# Supplementary material for: Gene Expressing and sRNA Sequencing Show That Gene Differentiation Associates with a YellowAcer palmatumMutant Leaf in Different Light Conditions
Source: Hindawi journal article supplement (doi:10.1155/2015/843470), 2015-01-01
Supplement: f1 [file 843470.f1.zip]

[illegible]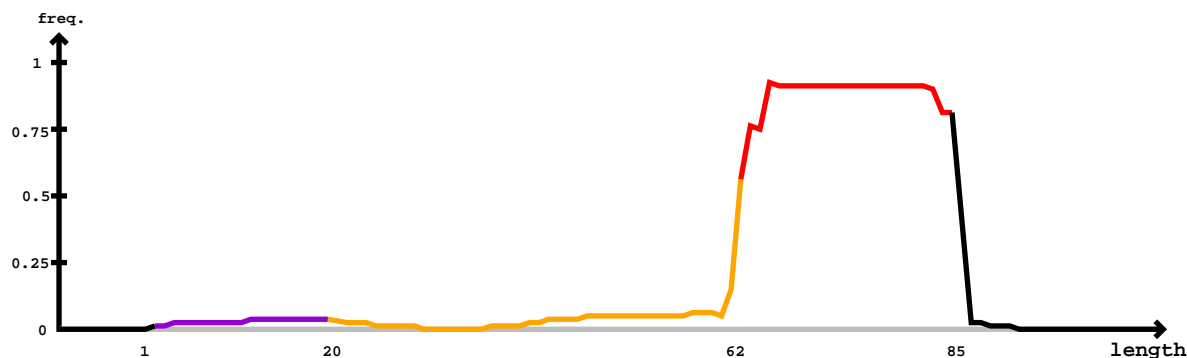

## Mature

[illegible]

Star

**Mature**

[illegible]

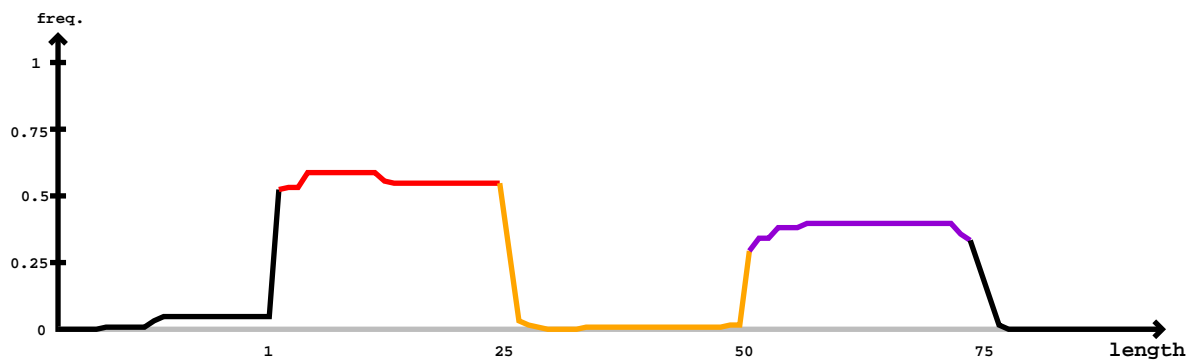

## Mature

Star

[illegible]

Mature

Star

|                                                                                                               |   |   |     |
|---------------------------------------------------------------------------------------------------------------|---|---|-----|
| ccgaaaaauuguaaaccucuaucuccaagcgaagcaaaucuggcccgacauuauuuuauuggaugggucagaaugucgaccguuggagauaggaggucuuacaauuuua |   |   |     |
| .....agaauugucgaccguuggagau.....                                                                              | 1 | 0 | S02 |
| .....agaauugucgaccguuggagau.....                                                                              | 1 | 0 | S02 |
| .....aaauugucgaccguuggaga.....                                                                                | 1 | 0 | S02 |
| .....aaauugucgaccguuggagU.....                                                                                | 1 | 1 | S02 |
| .....aaauugucgaccguuggagagg.....                                                                              | 2 | 0 | S02 |
| .....uguUgaccguuggagagg.....                                                                                  | 1 | 1 | S02 |





| Star                                                                                                                                                                              | Mature |   |     |
|-----------------------------------------------------------------------------------------------------------------------------------------------------------------------------------|--------|---|-----|
| uucccuagaa <u>uuuuuccau</u> agaucuaaggcuuuu <u>gaacu</u> acuuuuuau <u>gua</u> uuacagaauc <u>ccu</u> cucaugcuuuuagaucuagggaaaauu <u>cu</u> agggaaa <u>uu</u> caugucua <u>u</u> acu |        |   |     |
| .....uuuGgauc <u>u</u> agggaaaa <u>uu</u> cu.....                                                                                                                                 | 1      | 1 | S02 |
| .....uuuagaucuagggaaaa <u>uu</u> U.....                                                                                                                                           | 3      | 1 | S02 |
| .....uuuagaucuagggaaaa <u>uu</u> cu.....                                                                                                                                          | 8      | 0 | S02 |
| .....uuuagaucuagggaaaa <u>uu</u> cu.....                                                                                                                                          | 5      | 0 | S02 |
| .....uuuagaucuagggaaaa <u>uu</u> cuU.....                                                                                                                                         | 2      | 1 | S02 |
| .....uuuagaucuagggaaaa <u>uu</u> cuU.....                                                                                                                                         | 1      | 1 | S02 |
| .....uuuagaucuagggaaaa <u>uu</u> cuag.....                                                                                                                                        | 1      | 0 | S02 |
| .....uuuagaucuagggaaaa <u>uu</u> cuagA.....                                                                                                                                       | 1      | 1 | S02 |
| .....uuuagaucuagggaaaa <u>uu</u> cuagg.....                                                                                                                                       | 1      | 0 | S02 |
| .....uagaucuagggaaaa <u>uu</u> U.....                                                                                                                                             | 1      | 1 | S02 |
| .....uagaucuagggaaaa <u>uu</u> cu.....                                                                                                                                            | 2      | 0 | S02 |

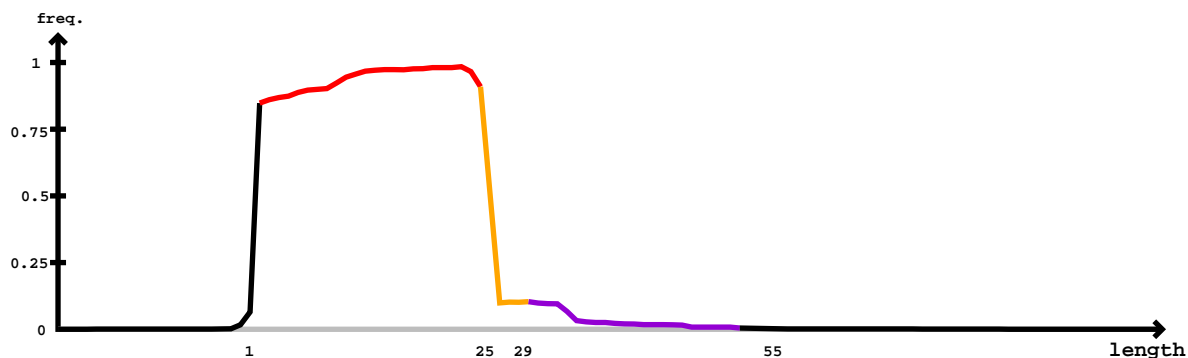[illegible]

## Mature

## Star

gacugcgugacacaccuauagcuaaacuugguugguucugacggguuuuuuugguugguuuuagggaguaagacauaugggaaaucucgggccacacccccggccacaaaaaagaugca

|                                        |    |   |     |
|----------------------------------------|----|---|-----|
| .....cCaacuugguugguucugacgg.....       | 1  | 1 | S01 |
| .....cCaacuugguugguucugacgggu.....     | 2  | 1 | S01 |
| .....cuaacuugguugguucugacggguCu.....   | 1  | 1 | S01 |
| .....uaacuugguugguucugacgggu.....      | 1  | 0 | S01 |
| .....Caacuugguugguucugacgggu.....      | 3  | 1 | S01 |
| .....aacuugguugguucugacA.....          | 1  | 1 | S01 |
| .....aaUuugguugguucugacgg.....         | 1  | 1 | S01 |
| .....aacuugguugguucugacggC.....        | 1  | 1 | S01 |
| .....aaUuugguugguucugacgggu.....       | 2  | 1 | S01 |
| .....aacuugguugguucugacgggu.....       | 3  | 0 | S01 |
| .....aacuugguuAguucugacgggu.....       | 2  | 1 | S01 |
| .....aacuugguugguucugacggguC.....      | 1  | 1 | S01 |
| .....acuugguugguucugacAgu.....         | 1  | 1 | S01 |
| .....acuugguugguucugacggC.....         | 1  | 1 | S01 |
| .....acuugguugguucugacgggu.....        | 2  | 0 | S01 |
| .....acuugguugguucugacggguCuauu.....   | 2  | 1 | S01 |
| .....uugguugguucugacggguCuauuug.....   | 1  | 1 | S01 |
| .....uguugguucugacggguuuuuuugu.....    | 1  | 0 | S01 |
| .....uguugguucugacggguCuauuugu.....    | 17 | 1 | S01 |
| .....uguugguucugacggguCuauuuguu.....   | 1  | 1 | S01 |
| .....guugguucugacggguCuauuugu.....     | 1  | 1 | S01 |
| .....guugguucugacggguCuauuuguu.....    | 18 | 1 | S01 |
| .....uugguucugacggguCuauuugu.....      | 1  | 1 | S01 |
| .....uugguucugacggguCuauuuguu.....     | 6  | 1 | S01 |
| .....uugguucugacggguCuauuuguug.....    | 2  | 1 | S01 |
| .....ugguucugacggguCuauuugu.....       | 3  | 1 | S01 |
| .....ugguucugacggguCuauuuguu.....      | 2  | 1 | S01 |
| .....ugguucugacggguCuauuuguug.....     | 2  | 1 | S01 |
| .....ugguucugacggguCuauuuguugg.....    | 2  | 1 | S01 |
| .....gguucugacggguCuauuugu.....        | 1  | 1 | S01 |
| .....gguucugacggguCuauuuguu.....       | 1  | 1 | S01 |
| .....guucugacggguuuuuuAuggau.....      | 1  | 1 | S01 |
| .....cugacggguCuauuuguuggau.....       | 1  | 1 | S01 |
| .....cugacggguCuauuuguuggauuu.....     | 2  | 1 | S01 |
| .....gacggguCuauuuguuggau.....         | 1  | 1 | S01 |
| .....gacggguCuauuuguuggauu.....        | 2  | 1 | S01 |
| .....gacggguCuauuuguuggauuaugga.....   | 1  | 1 | S01 |
| .....gguCuauuuguuggauuauggagu.....     | 4  | 1 | S01 |
| .....guCuauuuguuggauuauggagu.....      | 1  | 1 | S01 |
| .....auuuguuAgaauauggag.....           | 1  | 1 | S01 |
| .....auuuguuggauuuUgaguaagac.....      | 3  | 1 | S01 |
| .....uuguuggauuuUgaguaagaca.....       | 1  | 1 | S01 |
| .....uuguuggauuauggaguaagacaA.....     | 1  | 1 | S01 |
| .....auuauuggaguaagacauauAggaa.....    | 1  | 1 | S01 |
| .....aucucgggcUcacaccccccg.....        | 1  | 1 | S01 |
| .....cCauagcuaacuugguugguucuga.....    | 1  | 1 | S02 |
| .....uauagUuaacuugguuggu.....          | 1  | 1 | S02 |
| .....auagcuaacuugguugguucugacA.....    | 2  | 1 | S02 |
| .....auaAcuacuugguugguucugacg.....     | 1  | 1 | S02 |
| .....auagcuaacuugguugguucugacg.....    | 3  | 0 | S02 |
| .....auagcCaacuugguugguucugacg.....    | 10 | 1 | S02 |
| .....auagcCaacuugguugguucugacgg.....   | 1  | 1 | S02 |
| .....auagcuaacuugguugguucugacgU.....   | 1  | 1 | S02 |
| .....auagcuaacuugguugguucugacgg.....   | 1  | 0 | S02 |
| .....uagcCaacuugguugguucugacgg.....    | 28 | 1 | S02 |
| .....uagcuaaacuCuugguugguucugacgg..... | 1  | 1 | S02 |
| .....uagcuaacuugguugguucugacgg.....    | 10 | 0 | S02 |
| .....uagcuaacuugguugguucugacgggu.....  | 4  | 0 | S02 |
| .....uagcCaacuugguugguucugacgggu.....  | 6  | 1 | S02 |
| .....agcCaacuugguugguucugac.....       | 5  | 1 | S02 |
| .....agcuaacuugguugguucugacg.....      | 1  | 0 | S02 |
| .....agcCaacuugguugguucugacg.....      | 3  | 1 | S02 |
| .....agcuaacuugguugguucugacgA.....     | 1  | 1 | S02 |
| .....agcuaacuugguugguucugacgg.....     | 2  | 0 | S02 |
| .....agcCaacuugguugguucugacgg.....     | 5  | 1 | S02 |
| .....aAcuacuugguugguucugacgg.....      | 1  | 1 | S02 |
| .....agcuaacuugguugguucugacgC.....     | 1  | 1 | S02 |
| .....agcuaacuugguugguuUgacgggu.....    | 1  | 1 | S02 |
| .....agcuaacuugguCgguucugacgggu.....   | 1  | 1 | S02 |

## Mature

## Star

gacugcgugacacaccuauagcuaaacuugguugguucugacgguuuuuuuugguuggauuuagggaguaagacauaugggaaaucucggccccacacccccggccacaaaaaagaugca

|                                       |     |   |     |
|---------------------------------------|-----|---|-----|
| .....agcuaaacuugguugguucugacggg.....  | 127 | 0 | S02 |
| .....agcuaaacuugguugguucugCcggu.....  | 1   | 1 | S02 |
| .....agcuaaacuGguugguucugacggg.....   | 1   | 1 | S02 |
| .....agcuGacuugguugguucugacggg.....   | 2   | 1 | S02 |
| .....Ngcuaaacuugguugguucugacggg.....  | 1   | 1 | S02 |
| .....agcuaaacuugguugguucugacggC.....  | 13  | 1 | S02 |
| .....aAcuaaacuugguugguucugacggg.....  | 4   | 1 | S02 |
| .....Ggcuaaacuugguugguucugacggg.....  | 3   | 1 | S02 |
| .....agGuaaacuugguugguucugacggg.....  | 1   | 1 | S02 |
| .....agcuaaacuugguugguucugacAGu.....  | 11  | 1 | S02 |
| .....agcuaaacuugguugguucugacggG.....  | 7   | 1 | S02 |
| .....agcuaaacuugguugguucugacggA.....  | 1   | 1 | S02 |
| .....agcAaacuugguugguucugacggg.....   | 9   | 1 | S02 |
| .....agcCaacuugguugguucugacggg.....   | 365 | 1 | S02 |
| .....agcuaaacuugguugguucugGcggu.....  | 2   | 1 | S02 |
| .....agcuaaacuugguugguucugacgggu..... | 1   | 0 | S02 |
| .....gcCaacuugguugguucugacg.....      | 2   | 1 | S02 |
| .....gcCaacuugguugguucugacgg.....     | 3   | 1 | S02 |
| .....gcuaaacuugguugguucugacAGu.....   | 1   | 1 | S02 |
| .....gcCaacuugguugguucugacggg.....    | 7   | 1 | S02 |
| .....cuaacuugguugguucugacA.....       | 1   | 1 | S02 |
| .....cCaacuugguugguucugacgg.....      | 1   | 1 | S02 |
| .....cuaacuugguugguucugacgg.....      | 1   | 0 | S02 |
| .....cAaacuugguugguucugacgg.....      | 1   | 1 | S02 |
| .....cCaacuugguugguucugacggg.....     | 4   | 1 | S02 |
| .....cuaacuugguugguucugacAGu.....     | 1   | 1 | S02 |
| .....Caacuugguugguucugacg.....        | 1   | 1 | S02 |
| .....Caacuugguugguucugacgg.....       | 1   | 1 | S02 |
| .....Caacuugguugguucugacggg.....      | 3   | 1 | S02 |
| .....uaacuugguugguucugacgggCu.....    | 1   | 1 | S02 |
| .....aacuugguugguucugacg.....         | 1   | 0 | S02 |
| .....aacuugguugguucugacA.....         | 1   | 1 | S02 |
| .....aacuugguugguucugacCg.....        | 1   | 1 | S02 |
| .....aacuugguugguucugacggg.....       | 5   | 0 | S02 |
| .....aaUuugguugguucugacggg.....       | 1   | 1 | S02 |
| .....aacuugguugguucugacggC.....       | 1   | 1 | S02 |
| .....aacuugguugguucugacAGu.....       | 1   | 1 | S02 |
| .....aacuugguugAuucugacggg.....       | 1   | 1 | S02 |
| .....aacuugguugguucugacgggCuauu.....  | 1   | 1 | S02 |
| .....acuugguugguucugacgg.....         | 1   | 0 | S02 |
| .....acuugguugguucugacggg.....        | 1   | 0 | S02 |
| .....aUuugguugguucugacggg.....        | 2   | 1 | S02 |
| .....acuugguugAuucugacggg.....        | 1   | 1 | S02 |
| .....acuugguugguucugacgggCuauu.....   | 4   | 1 | S02 |
| .....cuugguugguucugacAGu.....         | 1   | 1 | S02 |
| .....cuugguugguucugacgggCu.....       | 1   | 1 | S02 |
| .....cuugguugguucugacgggCuauu.....    | 3   | 1 | S02 |
| .....uugguugguucugacgggCuauuu.....    | 4   | 1 | S02 |
| .....ugguugguucugacgggCuauuuugu.....  | 16  | 1 | S02 |
| .....ugguugguucugacgggCuauuuuguu..... | 1   | 1 | S02 |
| .....guugguucugacgggCuauuuugu.....    | 3   | 1 | S02 |
| .....guugguucugacgggCuauuuuguu.....   | 15  | 1 | S02 |
| .....guuAGuucugacggguuuauuuugu.....   | 1   | 1 | S02 |
| .....uugguucugacgggCuauuuugu.....     | 1   | 1 | S02 |
| .....uugguucugacgggCuauuuuguu.....    | 10  | 1 | S02 |
| .....ugguucugacgggCuauuuugu.....      | 1   | 1 | S02 |
| .....ugguucugacggguuuauuuugu.....     | 1   | 0 | S02 |
| .....ugguucugacgggCuauuuugu.....      | 2   | 1 | S02 |
| .....ugguucugacgggCuauuuuguug.....    | 3   | 1 | S02 |
| .....ugguucugacgggCuauuuuguugg.....   | 3   | 1 | S02 |
| .....gguucugacgggCuauuuugu.....       | 2   | 1 | S02 |
| .....gguucugacgggCuauuuuguu.....      | 1   | 1 | S02 |
| .....gguucugacgggCuauuuuguug.....     | 1   | 1 | S02 |
| .....guucugacgggCuauuuugu.....        | 2   | 1 | S02 |
| .....guucugacgggCuauuuuguu.....       | 1   | 1 | S02 |
| .....cugacgggCuauuuuguuggauua.....    | 1   | 1 | S02 |
| .....cugacgggCuauuuuguuggauua.....    | 2   | 1 | S02 |
| .....ugacgggCuauuuuguuggau.....       | 1   | 1 | S02 |
| .....gacgggCuauuuuguuggau.....        | 3   | 1 | S02 |
| .....cgggCuauuuuguuggauuauggag.....   | 1   | 1 | S02 |

Mature

Star

|                                                                                                                     |   |   |     |
|---------------------------------------------------------------------------------------------------------------------|---|---|-----|
| gacugcgugacacaccuauagcuaacuuguugguucugacgguuuuuuuguugggauuuaggaguaagacauaugggaaaucucgggccacacccccgggccacaaaaagaugca |   |   |     |
| .....gguCuauuuuguuggauuuaggagu.....                                                                                 | 5 | 1 | S02 |
| .....gguuuuuuuguuGgauuuaggagu.....                                                                                  | 1 | 1 | S02 |
| .....gguuuuuuuguuggauuuaggagu.....                                                                                  | 2 | 0 | S02 |
| .....guCuauuuuguuggauuuaggagu.....                                                                                  | 1 | 1 | S02 |
| .....auuuuguuggauuuaggaguaagac.....                                                                                 | 1 | 0 | S02 |
| .....auuuguuuAgauuuaggaguaagac.....                                                                                 | 1 | 1 | S02 |
| .....auuuguuggauuuaggaguaUgaca.....                                                                                 | 1 | 1 | S02 |
| .....auuuguuggauuuaggaguaagaca.....                                                                                 | 1 | 0 | S02 |
| .....uuguuggauuuaggaguaagac.....                                                                                    | 1 | 0 | S02 |
| .....uuguuggauuuaggaguaGgaca.....                                                                                   | 1 | 1 | S02 |
| .....uguuggauuuaggaguaagacaGa.....                                                                                  | 1 | 1 | S02 |
| .....aagacauaugggaaaucUggccc.....                                                                                   | 1 | 1 | S02 |

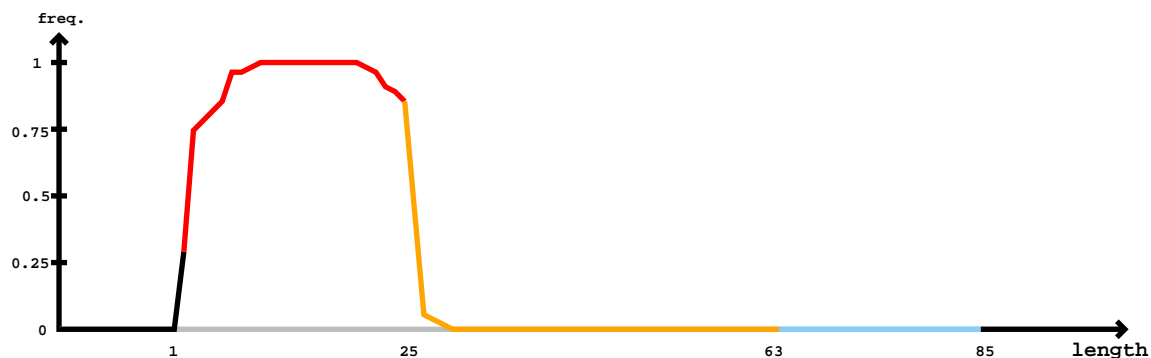

Star

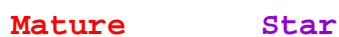[illegible]



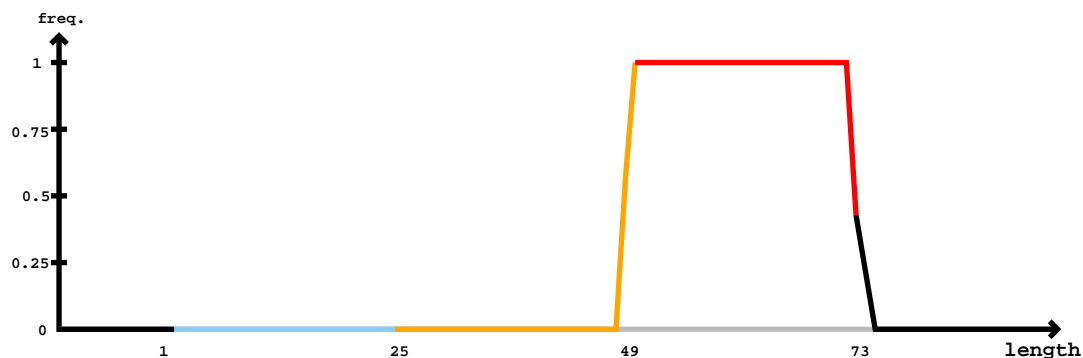

## Mature

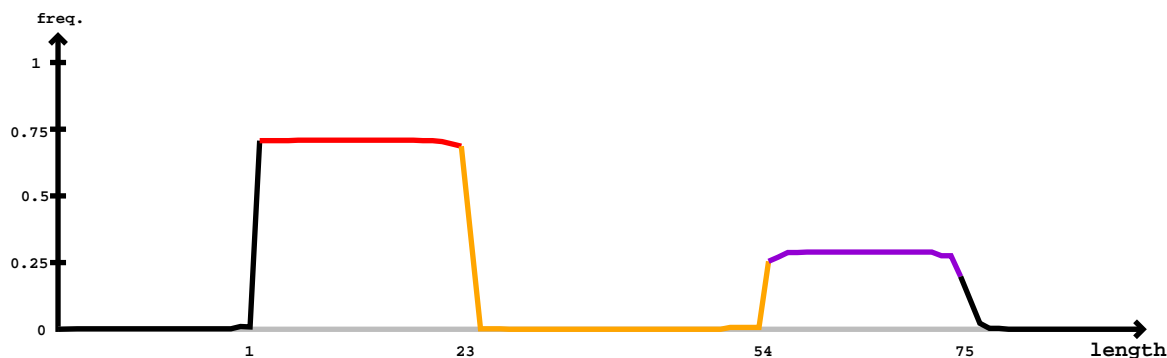

Star

[illegible]

## Mature

## Star

aaaagacguucagggagucuugucgcaagagcgauggcaccaccuggcaagaaacuugugggaacugggaagugccagcacucugugacaagacacccugcaacuucuuua

|                                           |     |   |     |
|-------------------------------------------|-----|---|-----|
| .....ugcAagcacucugugacaaga.....           | 1   | 1 | S01 |
| .....ugccagcacucugugaAaaga.....           | 1   | 1 | S01 |
| .....ugccagcacAcugugacaaga.....           | 1   | 1 | S01 |
| .....ugccagcacucugugacaUga.....           | 2   | 1 | S01 |
| .....Cgccagcacucugugacaaga.....           | 1   | 1 | S01 |
| .....ugccagcacGcugugacaaga.....           | 1   | 1 | S01 |
| .....ugccagcacucugugaGaaga.....           | 1   | 1 | S01 |
| .....ugccagcacucugugacaagaA.....          | 1   | 1 | S01 |
| .....ugccagcacucugugacaagaUa.....         | 1   | 1 | S01 |
| .....gccagcacucugugacaag.....             | 3   | 0 | S01 |
| .....Uccagcacucugugacaaga.....            | 1   | 1 | S01 |
| .....gccagcacucugugacaaga.....            | 3   | 0 | S01 |
| .....ccagcacucugugacaagac.....            | 1   | 0 | S01 |
| .....ccagcacucugugacaagacC.....           | 1   | 1 | S01 |
| .....ccagcacucugugacaagaca.....           | 4   | 0 | S01 |
| .....agcacucugugacaagacacc.....           | 1   | 0 | S01 |
| .....uc <u>uugucgcaagagcg</u> auggca..... | 2   | 0 | S02 |
| .....uugucgcaagagcgauggcac.....           | 1   | 0 | S02 |
| .....uugucgcaagagcgauggcacU.....          | 21  | 1 | S02 |
| .....uugucgcaagagcgauggcaUc.....          | 1   | 1 | S02 |
| .....uugucgcaagagcgCggcacc.....           | 2   | 1 | S02 |
| .....uugucgcaagagcgauAgcacc.....          | 1   | 1 | S02 |
| .....uugucgcaagGgcgauggcacc.....          | 1   | 1 | S02 |
| .....uugGcgcaagagcgauggcacc.....          | 1   | 1 | S02 |
| .....uugucgcaagagcgauggcacA.....          | 9   | 1 | S02 |
| .....uugucgcaagagcgauggcacc.....          | 118 | 0 | S02 |
| .....Nugucgcaagagcgauggcacc.....          | 1   | 1 | S02 |
| .....uugucgcaagagcgauggcGcc.....          | 1   | 1 | S02 |
| .....uugucgcaagagcgauggcacG.....          | 3   | 1 | S02 |
| .....uugucgcaagaUcgauggcacc.....          | 1   | 1 | S02 |
| .....Cugucgcaagagcgauggcacc.....          | 1   | 1 | S02 |
| .....uugucgcaGgagcgauggcacc.....          | 1   | 1 | S02 |
| .....uugCcgcaagagcgauggcacc.....          | 1   | 1 | S02 |
| .....uugucgcaagagUgauggcacc.....          | 1   | 1 | S02 |
| .....uugucgcaagagGgauggcacc.....          | 1   | 1 | S02 |
| .....uugucgcaagagcggaGggcacc.....         | 1   | 1 | S02 |
| .....uugucgUaagagcgauggcacc.....          | 1   | 1 | S02 |
| .....uugucgcGagagcgauggcacc.....          | 1   | 1 | S02 |
| .....uugucgcaagagcgauggcaccaccC.....      | 1   | 1 | S02 |
| .....ugccagcacucugugaca.....              | 1   | 0 | S02 |
| .....ugccagcacucugugacG.....              | 1   | 1 | S02 |
| .....ugccagcacucugugacaag.....            | 8   | 0 | S02 |
| .....ugccagcacucugugacaaga.....           | 18  | 0 | S02 |
| .....ugccagcacucugGgacaaga.....           | 1   | 1 | S02 |
| .....Agccagcacucugugacaaga.....           | 1   | 1 | S02 |
| .....gccagcacucugugacaagacU.....          | 1   | 1 | S02 |
| .....gccagcacucugugacaagacacU.....        | 1   | 1 | S02 |
| .....ccagcacucugUcaagaca.....             | 1   | 1 | S02 |
| .....ccagcacucugugacaagaca.....           | 3   | 0 | S02 |



## Mature

## Star

|                                                                                                                        |    |   |     |
|------------------------------------------------------------------------------------------------------------------------|----|---|-----|
| gaccggccaucagggggcuagcucagcuggguggaaggaacgggcuuagggcauggaauaacuccagguacagcgauucggaauucuaacccaagcgaaggcaaguucugauuuaccu |    |   |     |
| .uagcucagcuggguaAagg.                                                                                                  | 1  | 1 | S01 |
| .uagcucagcugggugaaaggacgg.                                                                                             | 4  | 0 | S01 |
| .uagcucagcugggugaaaggacgU.                                                                                             | 1  | 1 | S01 |
| .uagcucaAcugggugaaaggacgg.                                                                                             | 1  | 1 | S01 |
| .uagcucagcuCugggaaaggacgg.                                                                                             | 1  | 1 | S01 |
| .uagcuUagcugggugaaaggacgg.                                                                                             | 1  | 1 | S01 |
| .uagcucagcugggugaaaggacgg.                                                                                             | 1  | 1 | S01 |
| .uagcucagcCggugaaaggacggg.                                                                                             | 1  | 1 | S01 |
| .uagcCcagcugggugaaaggacggg.                                                                                            | 1  | 1 | S01 |
| .uagcucagcugggugaaaggacggg.                                                                                            | 10 | 0 | S01 |
| .uagcucagcugggugaaAgacggg.                                                                                             | 3  | 1 | S01 |
| .uagcucagcugggugaaaggacAg.                                                                                             | 1  | 1 | S01 |
| .uagcucagcugggugaaaggacAagg.                                                                                           | 1  | 1 | S01 |
| .uagcucaAcugggugaaaggacggg.                                                                                            | 3  | 1 | S01 |
| .uagcucagcugggugaaaggacggg.                                                                                            | 4  | 1 | S01 |
| .uagcucagcuAguggaaggacggg.                                                                                             | 5  | 1 | S01 |
| .uagcucUgcugggugaaaggacggg.                                                                                            | 3  | 1 | S01 |
| .uagUucagcugggugaaaggacggg.                                                                                            | 1  | 1 | S01 |
| .uaAcucagcugggugaaaggacggg.                                                                                            | 1  | 1 | S01 |
| .uagcucagcugggugaaaggacgCg.                                                                                            | 2  | 1 | S01 |
| .uagcucagcugggugaaaggacggA.                                                                                            | 9  | 1 | S01 |
| .uagcucagUgguggaaggacggg.                                                                                              | 6  | 1 | S01 |
| .agcucagcugggugaaaggacA.                                                                                               | 2  | 1 | S01 |
| .aAcucagcugggugaaaggacg.                                                                                               | 1  | 1 | S01 |
| .agUucagcugggugaaaggacgg.                                                                                              | 1  | 1 | S01 |
| .agcucagcugggugaaaggacgg.                                                                                              | 2  | 0 | S01 |
| .agcucagcuggAggaaggacgg.                                                                                               | 1  | 1 | S01 |
| .agcucagUgguggaaggacggg.                                                                                               | 2  | 1 | S01 |
| .agcucagcugggugaaaggacggA.                                                                                             | 1  | 1 | S01 |
| .agcucagcuAguggaaggacggg.                                                                                              | 1  | 1 | S01 |
| .agcucagcugggugaaaggacggg.                                                                                             | 4  | 0 | S01 |
| .agcucaAcugggugaaaggacggg.                                                                                             | 1  | 1 | S01 |
| .agcucagcugggugaaAgacgggc.                                                                                             | 30 | 1 | S01 |
| .agUucagcugggugaaaggacgggc.                                                                                            | 5  | 1 | S01 |
| .agcucUgcugggugaaaggacgggc.                                                                                            | 3  | 1 | S01 |
| .agcucagcugggugaaaggacgggc.                                                                                            | 2  | 1 | S01 |
| .agcucagcugUggaaaggacgggc.                                                                                             | 6  | 1 | S01 |
| .agcucagcugggugaaaggacgggG.                                                                                            | 3  | 1 | S01 |
| .agcucagcugggugaaGggacgggc.                                                                                            | 1  | 1 | S01 |
| .agcucagcugAuggaaggacgggc.                                                                                             | 2  | 1 | S01 |
| .aAcucagcugggugaaaggacgggc.                                                                                            | 1  | 1 | S01 |
| .agcucagcugggugaaaggacAggc.                                                                                            | 2  | 1 | S01 |
| .agcucagcugggugaaaggacgggc.                                                                                            | 86 | 0 | S01 |
| .agcucagcugggugaaaggGcgggc.                                                                                            | 1  | 1 | S01 |
| .agcucagcugggugGaggacgggc.                                                                                             | 1  | 1 | S01 |
| .agcucagcuggAggaaggacgggc.                                                                                             | 1  | 1 | S01 |
| .agcucGgcugggugaaaggacgggc.                                                                                            | 1  | 1 | S01 |
| .agcucagcugggugaaaggacUggc.                                                                                            | 1  | 1 | S01 |
| .agcucagcuggCggaaggacgggc.                                                                                             | 1  | 1 | S01 |
| .agcucagcuAguggaaggacgggc.                                                                                             | 7  | 1 | S01 |
| .agcucagcugggugaaaggCcgggc.                                                                                            | 1  | 1 | S01 |
| .agcucagcugggugaaaggacgggU.                                                                                            | 74 | 1 | S01 |
| .agcuAagcugggugaaaggacgggc.                                                                                            | 1  | 1 | S01 |
| .Ggcucagcugggugaaaggacgggc.                                                                                            | 3  | 1 | S01 |
| .agcucaAcugggugaaaggacgggc.                                                                                            | 6  | 1 | S01 |
| .agcucagcAgguugaaaggacgggc.                                                                                            | 1  | 1 | S01 |
| .agcucagcugggugaaaggacgggA.                                                                                            | 6  | 1 | S01 |
| .agcucagUgguggaaggacgggc.                                                                                              | 6  | 1 | S01 |
| .gcucagcugguAgaagga.                                                                                                   | 1  | 1 | S01 |
| .gUucagcugggugaaaggac.                                                                                                 | 1  | 1 | S01 |
| .gcucagcuAguggaaggacg.                                                                                                 | 1  | 1 | S01 |
| .gcucagcugggugaaAgacgg.                                                                                                | 1  | 1 | S01 |
| .gUucagcugggugaaaggacgg.                                                                                               | 1  | 1 | S01 |
| .gcucagcuggGggaaggacgg.                                                                                                | 1  | 1 | S01 |
| .gcucagcugggugaaaggacgg.                                                                                               | 5  | 0 | S01 |
| .gcucagcugggugaaaggacAg.                                                                                               | 1  | 1 | S01 |
| .gcucagcuAguggaaggacgg.                                                                                                | 2  | 1 | S01 |
| .gcucagcugggugaaAgacggg.                                                                                               | 1  | 1 | S01 |
| .gcucagcugggugaaaggacgggc.                                                                                             | 1  | 0 | S01 |
| .gcucagcugggugaaaggacgggcC.                                                                                            | 1  | 1 | S01 |

## Mature

## Star

gaccggcccaucagggggcuagcucagcugggggaaggacgggcuuagggcaguggaauaacuccagguacagcgaauucgaaauccuacccaagcgaaggcaaguucugauuuaccu

|                                     |    |   |     |
|-------------------------------------|----|---|-----|
| .....cucagcuAguuggaaggacg.....      | 1  | 1 | S01 |
| .....cucagcugguuggaaggacgg.....     | 2  | 0 | S01 |
| .....cucagcugguuggaAagacgg.....     | 1  | 1 | S01 |
| .....cucagcuAguuggaaggacgg.....     | 1  | 1 | S01 |
| .....cucagcugAguuggaaggacggg.....   | 1  | 1 | S01 |
| .....cucagcugguuggaaggacggAcuu..... | 1  | 1 | S01 |
| .....ucagUugguuggaaggacg.....       | 1  | 1 | S01 |
| .....ucagcugguuggaaggacgg.....      | 2  | 0 | S01 |
| .....ucaAucugguuggaaggacgg.....     | 2  | 1 | S01 |
| .....ucagcuAguuggaaggacgg.....      | 1  | 1 | S01 |
| .....ucagcuAguuggaaggacggg.....     | 1  | 1 | S01 |
| .....ucagcugguuggaAagacggg.....     | 1  | 1 | S01 |
| .....ucagcugguuggaaggacggg.....     | 3  | 0 | S01 |
| .....ucagcugguuggaaggacgggc.....    | 2  | 0 | S01 |
| .....ucagcugguuggaUggacgggc.....    | 1  | 1 | S01 |
| .....ucagcugAguuggaaggacgggc.....   | 1  | 1 | S01 |
| .....ucagcuAguuggaaggacgggc.....    | 1  | 1 | S01 |
| .....ucagcugguuggaaggacgggU.....    | 1  | 1 | S01 |
| .....ucagcugguuggaaggacgggcuu.....  | 2  | 0 | S01 |
| .....ucaAucugguuggaaggacgggcuu..... | 1  | 1 | S01 |
| .....cagcugguuggaAagacgg.....       | 1  | 1 | S01 |
| .....cagcugguuggaUgacgg.....        | 1  | 1 | S01 |
| .....cagcugguuggaaggacgg.....       | 3  | 0 | S01 |
| .....cagcugguuggaaggacggU.....      | 1  | 1 | S01 |
| .....cagcuAguuggaaggacggg.....      | 1  | 1 | S01 |
| .....cagcugguugAaaggacggg.....      | 1  | 1 | S01 |
| .....agcugguuggaaggacgggU.....      | 1  | 1 | S01 |
| .....agcugguuggaaggacgggcuC.....    | 1  | 1 | S01 |
| .....agcugguuggaaggacggAcuua.....   | 1  | 1 | S01 |
| .....agcugguuggaaggacgggcuuG.....   | 1  | 1 | S01 |
| .....agcugguuggaaggacggAcuuagg..... | 3  | 1 | S01 |
| .....agcugguuggaaggacgggcuuGgg..... | 1  | 1 | S01 |
| .....agcugguuggaaggacgggcuuagg..... | 2  | 0 | S01 |
| .....gguggaaggacgggcuuagA.....      | 1  | 1 | S01 |
| .....ggacgggcuuagggcauggauaacu..... | 1  | 0 | S01 |
| .....agggcauggGuaacuccca.....       | 1  | 1 | S01 |
| .....agggcauggauaacuUcagguc.....    | 1  | 1 | S01 |
| .....aacucccagguacagcgGuucgaa.....  | 1  | 1 | S01 |
| .....cucUcaggucagcgauucgaa.....     | 1  | 1 | S01 |
| .....ccaggucagcgauucgaaaucc.....    | 1  | 0 | S01 |
| .....caggucagcgauucgaaaucc.....     | 1  | 0 | S01 |
| .....ggucagcgGuucgaaaucc.....       | 1  | 1 | S01 |
| .....gucaAagcgaauucgaaaucc.....     | 1  | 1 | S01 |
| .....cagcgauucgaaauccuacccaagc..... | 1  | 0 | S01 |
| .....uucgaaauccuaccUaagc.....       | 1  | 1 | S01 |
| .....ucagggCgcuaagcucagcuggu.....   | 1  | 1 | S02 |
| .....ucagggCgcuaagcucagcuggu.....   | 1  | 1 | S02 |
| .....cGgggggcuagcucagcuggu.....     | 1  | 1 | S02 |
| .....cagggUgcuaagcucagcuggu.....    | 1  | 1 | S02 |
| .....agggCgcuaagcucagcuggu.....     | 1  | 1 | S02 |
| .....agggCgcuaagcucagcuggu.....     | 1  | 1 | S02 |
| .....gggggcuagcucagcuggu.....       | 1  | 0 | S02 |
| .....gggggcuagcucagcuggu.....       | 1  | 0 | S02 |
| .....gggggcuagcucagcCgguggaagg..... | 1  | 1 | S02 |
| .....gCgcuaagcucagcuggu.....        | 1  | 1 | S02 |
| .....Aucagcucagcuggu.....           | 1  | 1 | S02 |
| .....gcuagUucagcuggu.....           | 1  | 1 | S02 |
| .....gUuagcucagcuggu.....           | 5  | 1 | S02 |
| .....gcuagcucaAucuggu.....          | 1  | 1 | S02 |
| .....cuaAucagcuggu.....             | 1  | 1 | S02 |
| .....cuagcucagcuggu.....            | 1  | 1 | S02 |
| .....cuagcucagcucguggaaggacg.....   | 1  | 1 | S02 |
| .....cuagcucagcuggu.....            | 1  | 1 | S02 |
| .....cuagcucagcuggu.....            | 1  | 1 | S02 |
| .....cuagUucagcuggu.....            | 1  | 1 | S02 |
| .....cuagcucaAucuggu.....           | 1  | 1 | S02 |
| .....cuagcucagUuguggu.....          | 1  | 1 | S02 |
| .....cuagcucagcuggu.....            | 3  | 0 | S02 |
| .....cuagcucagUuguggu.....          | 1  | 1 | S02 |
| .....cuagcucaAucuggu.....           | 16 | 1 | S02 |

## Mature

## Star

gaccggcccaucagggggcuagcucagcuggggaaaggacgggcuuagggcauggaauaacuccagguacgagcgaauucgaauucuaacccaagcgaaggcaaguucugauuuaccu

|                                      |    |   |     |
|--------------------------------------|----|---|-----|
| .....cuagcucagcugggCggaaaggacgg..... | 1  | 1 | S02 |
| .....cuagcucagcCgguggaaggacgg.....   | 1  | 1 | S02 |
| .....cuagcucagcugAuggaaggacgg.....   | 4  | 1 | S02 |
| .....Uuagcucagcuggggaaaggacgg.....   | 3  | 1 | S02 |
| .....cuagcucagcuggggaaaggacCg.....   | 2  | 1 | S02 |
| .....cuagcucagcuAugggaaggacgg.....   | 3  | 1 | S02 |
| .....cuagcucagcugggAaaggacgg.....    | 1  | 1 | S02 |
| .....cuagcCcagcuggggaaaggacgg.....   | 2  | 1 | S02 |
| .....cuagcucagUugguggaaggacgg.....   | 5  | 1 | S02 |
| .....cuagcucagcuggggaaUgacgg.....    | 2  | 1 | S02 |
| .....cuagcucagcuCuggaaggacgg.....    | 6  | 1 | S02 |
| .....cuaAcucagcuggggaaaggacgg.....   | 1  | 1 | S02 |
| .....cuagcAcagcuggggaaaggacgg.....   | 1  | 1 | S02 |
| .....cuagUucagcuggggaaaggacgg.....   | 9  | 1 | S02 |
| .....cuagcucagcuggggaaAgacgg.....    | 1  | 1 | S02 |
| .....cuagcucagcuggggaaaggacGA.....   | 1  | 1 | S02 |
| .....cuagcucUgcuggggaaaggacgg.....   | 2  | 1 | S02 |
| .....cuagcucagcuggggaaaggacgg.....   | 38 | 0 | S02 |
| .....cuagcucagcuggggaaaggacggg.....  | 1  | 0 | S02 |
| .....cuagcucagcugAuggaaggacggg.....  | 2  | 1 | S02 |
| .....cuagcucagcuggggaaAgacggg.....   | 1  | 1 | S02 |
| .....cuagcucagcuggggaaaggauGgg.....  | 1  | 1 | S02 |
| .....uagUucagcuggggaaagg.....        | 1  | 1 | S02 |
| .....uagcucagcuggggaaaggacg.....     | 2  | 0 | S02 |
| .....uagUucagcuggggaaaggacg.....     | 1  | 1 | S02 |
| .....uagcuUagcuggggaaaggacg.....     | 1  | 1 | S02 |
| .....uagcucagcuggggaaaggauGg.....    | 1  | 1 | S02 |
| .....uagcucagcuAuggaaggacgg.....     | 1  | 1 | S02 |
| .....uagcucCgcuggggaaaggacgg.....    | 1  | 1 | S02 |
| .....uagcucagUugguggaaggacgg.....    | 1  | 1 | S02 |
| .....uagcucagcuggggaaaggacgg.....    | 14 | 0 | S02 |
| .....uagcucagcGgguggaaggacgg.....    | 1  | 1 | S02 |
| .....uagcucagcugggugAaaggacgg.....   | 1  | 1 | S02 |
| .....uagcucagcugAuggaaggacgg.....    | 2  | 1 | S02 |
| .....uagUucagcuggggaaaggacgg.....    | 4  | 1 | S02 |
| .....uagcucagcuggggaaUgacggg.....    | 1  | 1 | S02 |
| .....uagcucagUugguggaaggacggg.....   | 6  | 1 | S02 |
| .....uagcucagcuggggaaaggacggA.....   | 5  | 1 | S02 |
| .....uagcucagcuggggaaaggacggU.....   | 1  | 1 | S02 |
| .....uagcucagcuggggaaaggacGAg.....   | 3  | 1 | S02 |
| .....uagcucagcuAuggaaggacggg.....    | 3  | 1 | S02 |
| .....uagcucAAcuggggaaaggacggg.....   | 6  | 1 | S02 |
| .....uagcucagcugCuggaaaggacggg.....  | 1  | 1 | S02 |
| .....uagcucUgcuggggaaaggacggg.....   | 2  | 1 | S02 |
| .....uagcucagcugggugAaaggacggg.....  | 1  | 1 | S02 |
| .....uagcucagcuggggaaAgacggg.....    | 11 | 1 | S02 |
| .....uagcucagcuggggaaaggacggg.....   | 27 | 0 | S02 |
| .....uagcucagcCgguggaaggacggg.....   | 1  | 1 | S02 |
| .....uagcucagcuggggaaaggacggC.....   | 1  | 1 | S02 |
| .....uagcucagcugAuggaaggacgggc.....  | 1  | 1 | S02 |
| .....agcucagcuggggaaagg.....         | 1  | 0 | S02 |
| .....agcucagcuggggaaaggau.....       | 1  | 1 | S02 |
| .....agcucagcuggggaaaggacA.....      | 2  | 1 | S02 |
| .....agcucagcuAuggaaggacg.....       | 1  | 1 | S02 |
| .....agcucagcuggggaaAgacg.....       | 1  | 1 | S02 |
| .....agcucagcuggggaaaggacgg.....     | 4  | 0 | S02 |
| .....aAcucagcuggggaaaggacgg.....     | 1  | 1 | S02 |
| .....agcucagcuggggaaaggacGA.....     | 1  | 1 | S02 |
| .....agUucagcuggggaaaggacgg.....     | 1  | 1 | S02 |
| .....agcucagcuggggaaaggauGg.....     | 1  | 1 | S02 |
| .....agcucagUugguggaaggacgg.....     | 1  | 1 | S02 |
| .....agcucAAcuggggaaaggacgg.....     | 1  | 1 | S02 |
| .....agcucagcuggggaaAgacgg.....      | 3  | 1 | S02 |
| .....agcucagcuggggaaaggacggg.....    | 7  | 0 | S02 |
| .....agcucagUugguggaaggacggg.....    | 1  | 1 | S02 |
| .....agcucagcuggggaaaggacggA.....    | 2  | 1 | S02 |
| .....agcucagcuggggaaAgacggg.....     | 1  | 1 | S02 |
| .....agcucAAcuggggaaaggacggg.....    | 2  | 1 | S02 |
| .....agcucagcuggggaaaggacAgg.....    | 1  | 1 | S02 |
| .....agcucagcuggggaaAgacgggc.....    | 12 | 1 | S02 |

## Mature

## Star

|                                                                                                                      |     |   |     |
|----------------------------------------------------------------------------------------------------------------------|-----|---|-----|
| gaccggccaucagggggcuagcucagcuggguggaaggaacgggcuuagggcauggaauaacuccagguagcgcgaauucgaaucuaacccaagcgaaggcaagucugauuuaccu |     |   |     |
| .....agcucGgcuggguggaaggaacgggc.....                                                                                 | 1   | 1 | S02 |
| .....agcucagcuggguggaaggaacgggU.....                                                                                 | 46  | 1 | S02 |
| .....agcucagcuggguggaagAacgggc.....                                                                                  | 1   | 1 | S02 |
| .....agcucagcuggguggaaggaacgggc.....                                                                                 | 110 | 0 | S02 |
| .....agcucagcuggguggaaggaacggAac.....                                                                                | 3   | 1 | S02 |
| .....agcucagcugAuggaaggaacgggc.....                                                                                  | 2   | 1 | S02 |
| .....agcucagcuAuggaaggaacgggc.....                                                                                   | 12  | 1 | S02 |
| .....agcucagcuggguggaaggaacAggc.....                                                                                 | 2   | 1 | S02 |
| .....agcucagUugguggaaggaacgggc.....                                                                                  | 12  | 1 | S02 |
| .....agcucagcuggguggaaggaacgggA.....                                                                                 | 6   | 1 | S02 |
| .....agcucagcuggguggaaggaacgAgc.....                                                                                 | 1   | 1 | S02 |
| .....agcucagcugggCggaaggaacgggc.....                                                                                 | 1   | 1 | S02 |
| .....aAcucagcuggguggaaggaacgggc.....                                                                                 | 5   | 1 | S02 |
| .....agcucagcugggGaggacgggc.....                                                                                     | 1   | 1 | S02 |
| .....agUucagcuggguggaaggaacgggc.....                                                                                 | 6   | 1 | S02 |
| .....agcucAacuggguggaaggaacgggc.....                                                                                 | 7   | 1 | S02 |
| .....agcucagcuggguggaGggacgggc.....                                                                                  | 1   | 1 | S02 |
| .....Ggcucagcuggguggaaggaacgggc.....                                                                                 | 1   | 1 | S02 |
| .....agcucUgcuggguggaaggaacgggc.....                                                                                 | 3   | 1 | S02 |
| .....agcucagcuggguggaaggaAagggc.....                                                                                 | 1   | 1 | S02 |
| .....agcucagcugggUAgaaggaacgggc.....                                                                                 | 1   | 1 | S02 |
| .....agcucagcugUuggaaggaacgggc.....                                                                                  | 12  | 1 | S02 |
| .....gcucagUugguggaaggaacg.....                                                                                      | 1   | 1 | S02 |
| .....Acucagcuggguggaaggaacgg.....                                                                                    | 1   | 1 | S02 |
| .....gcucagcugggugaaAgaacgg.....                                                                                     | 1   | 1 | S02 |
| .....gcucagcuggguggaaggaacgg.....                                                                                    | 2   | 0 | S02 |
| .....gcucagcuggguggaaggaacgggU.....                                                                                  | 1   | 1 | S02 |
| .....gcucagcuggguggaaggaacgggc.....                                                                                  | 1   | 0 | S02 |
| .....cucAacuggguggaaggaacgg.....                                                                                     | 2   | 1 | S02 |
| .....cucagcuggguggaaggaacgg.....                                                                                     | 1   | 0 | S02 |
| .....cucagcugAuggaaggaacgg.....                                                                                      | 1   | 1 | S02 |
| .....cucagcuggguggaaggaacgggc.....                                                                                   | 1   | 0 | S02 |
| .....cucagcuggguggaaggaacgggcu.....                                                                                  | 3   | 0 | S02 |
| .....cucagcuAuggaaggaacgggcuu.....                                                                                   | 1   | 1 | S02 |
| .....cucagcuggguggaaggaacgggUuu.....                                                                                 | 1   | 1 | S02 |
| .....cucagcuggguggaaggaUgggcuu.....                                                                                  | 1   | 1 | S02 |
| .....ucagcuggguggaaggaacA.....                                                                                       | 1   | 1 | S02 |
| .....ucagcuggguggaaggaacg.....                                                                                       | 1   | 0 | S02 |
| .....ucagcuggguggaaggaacC.....                                                                                       | 2   | 1 | S02 |
| .....ucagcugAuggaaggaacg.....                                                                                        | 2   | 1 | S02 |
| .....ucagcuggguggaaggaacgU.....                                                                                      | 1   | 1 | S02 |
| .....ucagcuggguggaaggaacgg.....                                                                                      | 2   | 0 | S02 |
| .....ucUgcuggguggaaggaacgggc.....                                                                                    | 1   | 1 | S02 |
| .....ucagcugggugaaAgaacgggc.....                                                                                     | 1   | 1 | S02 |
| .....ucagcuggguggaaggaacgUg.....                                                                                     | 1   | 1 | S02 |
| .....ucagcuAuggaaggaacgggc.....                                                                                      | 1   | 1 | S02 |
| .....ucagcuggguggaaggaacgggc.....                                                                                    | 1   | 0 | S02 |
| .....Acagcuggguggaaggaacgggc.....                                                                                    | 1   | 1 | S02 |
| .....ucUgcuggguggaaggaacgggc.....                                                                                    | 1   | 1 | S02 |
| .....ucagcuAuggaaggaacgggcuu.....                                                                                    | 1   | 1 | S02 |
| .....ucagcuggguggaaggaUgggcuu.....                                                                                   | 1   | 1 | S02 |
| .....ucagcuggguggaaggaacgggcuuU.....                                                                                 | 1   | 1 | S02 |
| .....ucagcuggguggaaggaacgggcuuG.....                                                                                 | 1   | 1 | S02 |
| .....ucagcuggguggaaggaacgggcuua.....                                                                                 | 1   | 0 | S02 |
| .....ucagcuggguggaaggaacgggcuuC.....                                                                                 | 2   | 1 | S02 |
| .....cagcCgguggaaggaacgg.....                                                                                        | 1   | 1 | S02 |
| .....cagcugggugaaAgaacgg.....                                                                                        | 1   | 1 | S02 |
| .....cagcuAuggaaggaacgg.....                                                                                         | 1   | 1 | S02 |
| .....cagcuggguggaaggaacgUg.....                                                                                      | 1   | 1 | S02 |
| .....cagcuggguggaaggaacggA.....                                                                                      | 1   | 1 | S02 |
| .....cagcugAuggaaggaacgggc.....                                                                                      | 1   | 1 | S02 |
| .....cagcuAuggaaggaacgggc.....                                                                                       | 1   | 1 | S02 |
| .....agcuggguggaaggaacggA.....                                                                                       | 1   | 1 | S02 |
| .....agcuAuggaaggaacgggc.....                                                                                        | 1   | 1 | S02 |
| .....agcuggguggaaggaacgggAcuuagg.....                                                                                | 1   | 1 | S02 |
| .....agUugguggaaggaacgggcuuagg.....                                                                                  | 1   | 1 | S02 |
| .....agcuggguggaaggaacgggcuUGgg.....                                                                                 | 2   | 1 | S02 |
| .....gcuggguggaaggaacgggc.....                                                                                       | 1   | 0 | S02 |



## Mature

## Star

|                     |                                                                                             |   |   |     |
|---------------------|---------------------------------------------------------------------------------------------|---|---|-----|
| gaccggccaucagggggcu | agcucagcuggggaaggacgggcuuagggcauggauaacuccaggucagcgauucgaaucuaaccaagcgaaggcaaguucugauuuaccu |   |   |     |
| .....               | .Ccugguggaaggacgggc.....                                                                    | 1 | 1 | S02 |
| .....               | .gcugguggaaggacgggU.....                                                                    | 1 | 1 | S02 |
| .....               | .gcugguggaaggacgggcuuGggg.....                                                              | 1 | 1 | S02 |
| .....               | .gguggaaggacgggAcuuagg.....                                                                 | 1 | 1 | S02 |
| .....               | .ggaaggacgggcuuaggg.....                                                                    | 1 | 0 | S02 |
| .....               | .gaaggacgggcuuagggc.....                                                                    | 1 | 0 | S02 |
| .....               | .aggacgggcuuGgggcauggaua.....                                                               | 1 | 1 | S02 |
| .....               | .gacgggcuuagggcaugg.....                                                                    | 1 | 0 | S02 |
| .....               | .acgggcuuGgggcauggauaacu.....                                                               | 1 | 1 | S02 |
| .....               | .uuagggcauggauaacuccagggu.....                                                              | 2 | 0 | S02 |
| .....               | .agggcauggauaacuccagguc.....                                                                | 1 | 0 | S02 |
| .....               | .aacuccaggucagcgGuucgaa.....                                                                | 2 | 1 | S02 |
| .....               | .ccaggucagcgauucgaaucua.....                                                                | 1 | 0 | S02 |
| .....               | .caggucagcgauucgaaucuu.....                                                                 | 1 | 0 | S02 |
| .....               | .caggucagcgacCucgaaucua.....                                                                | 1 | 1 | S02 |
| .....               | .caggucagcgacCucgaaucua.....                                                                | 2 | 1 | S02 |
| .....               | .aggucaAcgauucgaaucua.....                                                                  | 2 | 1 | S02 |
| .....               | .aggucaAcgauucgaaucua.....                                                                  | 1 | 0 | S02 |
| .....               | .gucagcgauucgaaucua.....                                                                    | 1 | 0 | S02 |
| .....               | .ucagcgauucgaaucua.....                                                                     | 1 | 0 | S02 |
| .....               | .gcgauucgaaucuaA.....                                                                       | 1 | 1 | S02 |
| .....               | .acccaUgcgaaggcaaguucugau.....                                                              | 1 | 1 | S02 |
| .....               | .aagcgaaggcaaAuuucugau.....                                                                 | 1 | 1 | S02 |
| .....               | .aGgcgaaggcaaguucugauuuac.....                                                              | 1 | 1 | S02 |
| .....               | .aaggcaaguucugauuuacUu.....                                                                 | 1 | 1 | S02 |
| .....               | .aaggcGaguucugauuuaccu.....                                                                 | 1 | 1 | S02 |

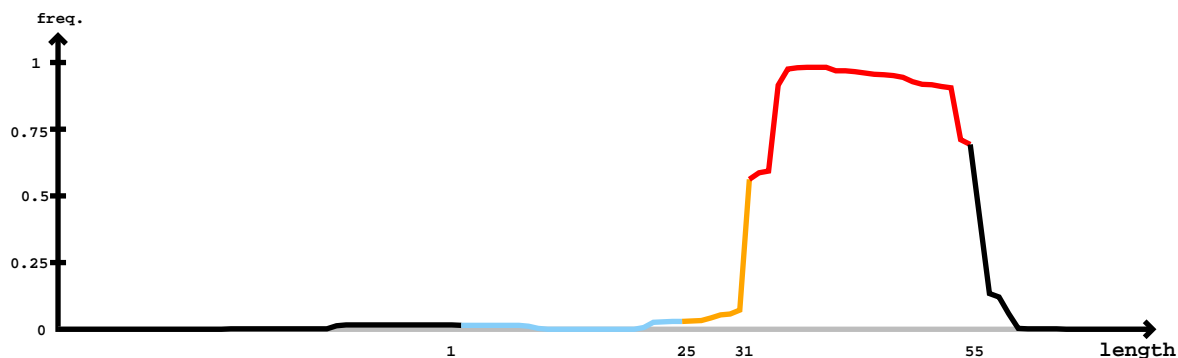

## Star

## Mature

uuugauuuuuuuuauaaagagauagauuuugguggaaguccauauuggauuuuccaccguucaucuauagagauggacgguggagauccaaucuggaucuccaacaauccaaa

|                                      |    |   |     |
|--------------------------------------|----|---|-----|
| .....auggacgguggagauccaaUugg.....    | 1  | 1 | S01 |
| .....auggacgguggaUauccaaucugg.....   | 1  | 1 | S01 |
| .....augAacgguggagauccaaucugg.....   | 2  | 1 | S01 |
| .....auggacgAuggagauccaaucugg.....   | 1  | 1 | S01 |
| .....auggacgguggagauccaaucugU.....   | 1  | 1 | S01 |
| .....auggacgguggagauccaaucugA.....   | 4  | 1 | S01 |
| .....auAacgguggagauccaaucugg.....    | 1  | 1 | S01 |
| .....auggacgguggagauccaaucuggU.....  | 1  | 1 | S01 |
| .....auggacgguggagauccaaucuggG.....  | 2  | 1 | S01 |
| .....uggacggugUagauccaa.....         | 1  | 1 | S01 |
| .....uggacgguggagauccaaUugg.....     | 1  | 1 | S01 |
| .....uggacggugUagauccaaucugg.....    | 1  | 1 | S01 |
| .....ugAacgguggagauccaaucugga.....   | 1  | 1 | S01 |
| .....uggacgguggagauccaaucugga.....   | 2  | 0 | S01 |
| .....Agacgguggagauccaaucugg.....     | 2  | 1 | S01 |
| .....Agacgguggagauccaaucuggau.....   | 1  | 1 | S01 |
| .....gacgguggagauccaUucu.....        | 5  | 1 | S01 |
| .....gacgguggagauccaauc.....         | 6  | 0 | S01 |
| .....Aacgguggagauccaauc.....         | 3  | 1 | S01 |
| .....gacgguggagaucaUaauc.....        | 1  | 1 | S01 |
| .....gacgguggagauccaaucC.....        | 1  | 1 | S01 |
| .....gacggugAagauccaauc.....         | 1  | 1 | S01 |
| .....gacAuggagauccaaucugg.....       | 1  | 1 | S01 |
| .....Aacgguggagauccaaucugg.....      | 2  | 1 | S01 |
| .....gacgguggagauccaaUugg.....       | 2  | 1 | S01 |
| .....gacgguggagauccaUucugg.....      | 14 | 1 | S01 |
| .....gacggugAagauccaaucugg.....      | 2  | 1 | S01 |
| .....gacgguggagauccaaucugU.....      | 1  | 1 | S01 |
| .....gacgguggagauccaaucugg.....      | 5  | 0 | S01 |
| .....gacgguggagauccaaucugA.....      | 1  | 1 | S01 |
| .....gacgguggagaCccaaucugg.....      | 1  | 1 | S01 |
| .....gacgguggagauccaaucuggG.....     | 1  | 1 | S01 |
| .....gacgguggagauccaaucuggau.....    | 1  | 0 | S01 |
| .....gacgguggagauccaaucuggaG.....    | 1  | 1 | S01 |
| .....gacggugUagauccaaucuggauc.....   | 1  | 1 | S01 |
| .....gacgguggGgauccaaucuggauc.....   | 1  | 1 | S01 |
| .....gacgguggagaucaAaauucuggauc..... | 2  | 1 | S01 |
| .....gacgguggagauccaaucuggauU.....   | 1  | 1 | S01 |
| .....gacgguggagauccaGucuggauc.....   | 1  | 1 | S01 |
| .....gacgguggagauccaaucuggauc.....   | 9  | 0 | S01 |
| .....gacgguggagauccGaucuggauc.....   | 1  | 1 | S01 |
| .....gacgguggagauUcaauucuggauc.....  | 5  | 1 | S01 |
| .....gacgguggagauccaaCucuggauc.....  | 1  | 1 | S01 |
| .....gacgguggagauUcaauucuggauc.....  | 2  | 1 | S01 |
| .....acgguggagauccaaucuggauA.....    | 1  | 1 | S01 |
| .....acgguggagauUcaauucuggauc.....   | 12 | 1 | S01 |
| .....acgguggagaucaAaauucuggauc.....  | 1  | 1 | S01 |
| .....acgguggagauccaaucuggauc.....    | 2  | 0 | S01 |
| .....acgguggagauccaaucuggaucC.....   | 3  | 1 | S01 |
| .....uugguggaaguccaGauugg.....       | 2  | 1 | S02 |
| .....uugguggaaguccaGauugga.....      | 2  | 1 | S02 |
| .....uugguggaaguccaGauuggau.....     | 1  | 1 | S02 |
| .....caucuCaugagauggacgguggag.....   | 1  | 1 | S02 |
| .....aucuCaugagauggacgggu.....       | 2  | 1 | S02 |
| .....aucuCaugagauggacggugg.....      | 1  | 1 | S02 |
| .....aucuCaugagauggacgguggaga.....   | 1  | 1 | S02 |
| .....ucuCaugagauggacggugga.....      | 1  | 1 | S02 |
| .....Uugagauggacgguggagaucca.....    | 1  | 1 | S02 |
| .....ugagauggacggugAagaucc.....      | 1  | 1 | S02 |
| .....ugagauggacgguggagaucca.....     | 1  | 0 | S02 |
| .....ugagauUgacgguggagaucca.....     | 1  | 1 | S02 |
| .....ugagauggacgguggagauccaaU.....   | 1  | 1 | S02 |
| .....gagauggaUgguggagaucc.....       | 1  | 1 | S02 |
| .....gagauggacgguggagauccaa.....     | 1  | 0 | S02 |
| .....agauggacgguggaCaucc.....        | 1  | 1 | S02 |
| .....gauggacgCuggagaucc.....         | 1  | 1 | S02 |
| .....gauggGcgguggagaucc.....         | 1  | 1 | S02 |
| .....gauggacAuggagaucc.....          | 2  | 1 | S02 |
| .....gauggacAuggagauccaaucug.....    | 1  | 1 | S02 |

## Star

## Mature

uuugauuuuuuuuauaaagagauagauuuugguggaaguccauauuggauuuuccaccguucaucuauugagauggacgggagauccaauucggauuccaacaauccaaa

|                                       |    |   |     |
|---------------------------------------|----|---|-----|
| .....gauggacggugAagauccaauucg.....    | 1  | 1 | S02 |
| .....auggacgguggagaucca.....          | 1  | 0 | S02 |
| .....auggacgguggagauccaUu.....        | 1  | 1 | S02 |
| .....auggacgguggagauccaauuc.....      | 1  | 0 | S02 |
| .....auggacgguggagauccaauuc.....      | 38 | 0 | S02 |
| .....Guggacgguggagauccaauuc.....      | 1  | 1 | S02 |
| .....auggacggugAagauccaauuc.....      | 1  | 1 | S02 |
| .....auggacgguggagauccaauAu.....      | 3  | 1 | S02 |
| .....auggacgguggagauGcaaauuc.....     | 1  | 1 | S02 |
| .....auggacgguggagauccaUucu.....      | 1  | 1 | S02 |
| .....auggacgguggagauccaauucA.....     | 1  | 1 | S02 |
| .....auggacgguggagGuccaaauuc.....     | 1  | 1 | S02 |
| .....augUacgguggagauccaauuc.....      | 1  | 1 | S02 |
| .....auggacgguggagauccaauucC.....     | 2  | 1 | S02 |
| .....auggacggugCagauccaaauuc.....     | 1  | 1 | S02 |
| .....auggacgguggagauccaauucG.....     | 1  | 1 | S02 |
| .....auggGcgguggagauccaauuc.....      | 1  | 1 | S02 |
| .....auggacgguggagauccaauucg.....     | 1  | 0 | S02 |
| .....auggacgguggagauccaauAuug.....    | 1  | 1 | S02 |
| .....auggacggugUagauccaauucgg.....    | 1  | 1 | S02 |
| .....auggaGgguggagauccaauucgg.....    | 1  | 1 | S02 |
| .....auggacgguggagauGaaucugg.....     | 1  | 1 | S02 |
| .....augUacgguggagauccaauucgg.....    | 1  | 1 | S02 |
| .....auggacgguggagauccaCucugg.....    | 1  | 1 | S02 |
| .....auggacgguggagauAcaauucgg.....    | 1  | 1 | S02 |
| .....auggacgguggagauccaauucgA.....    | 10 | 1 | S02 |
| .....auggacggugAagauccaauucgg.....    | 1  | 1 | S02 |
| .....augAacgguggagauccaauucgg.....    | 4  | 1 | S02 |
| .....auggacgguggagauUcaauucgg.....    | 1  | 1 | S02 |
| .....auggacgguggagauccaUucugg.....    | 20 | 1 | S02 |
| .....auggacgguggagauccaauAuugg.....   | 22 | 1 | S02 |
| .....auggacAaguggagauccaauucgg.....   | 2  | 1 | S02 |
| .....auggacggugCagauccaaucugg.....    | 1  | 1 | S02 |
| .....auggacgguggagauccaauucugg.....   | 91 | 0 | S02 |
| .....auggacgguggagauccaauucgU.....    | 1  | 1 | S02 |
| .....auggacgguggaAauccaaucugg.....    | 1  | 1 | S02 |
| .....auggacgguggagauccaauucgC.....    | 1  | 1 | S02 |
| .....auggacgguggagauccaauucgguU.....  | 3  | 1 | S02 |
| .....auggacgguggagauccaauucgguUu..... | 1  | 1 | S02 |
| .....auggacgguggagauccaauucggaA.....  | 1  | 1 | S02 |
| .....uggacgguggagauccaC.....          | 1  | 1 | S02 |
| .....uggacggugAagauccaauuc.....       | 1  | 1 | S02 |
| .....uggacgguggagauccaGaucu.....      | 1  | 1 | S02 |
| .....ugAacgguggagauccaauuc.....       | 1  | 1 | S02 |
| .....uggacgguggagauccaauuc.....       | 1  | 0 | S02 |
| .....uggacgguggagauccaauucU.....      | 1  | 1 | S02 |
| .....uggacgguggagauccaauucg.....      | 1  | 0 | S02 |
| .....uggacgguggagauccaauucg.....      | 1  | 0 | S02 |
| .....uggacgguggagauccaUucugg.....     | 1  | 1 | S02 |
| .....Agacgguggagauccaauucggau.....    | 1  | 1 | S02 |
| .....Aacgguggagauccaauuc.....         | 3  | 1 | S02 |
| .....gacggugUagauccaauuc.....         | 1  | 1 | S02 |
| .....gacgguggagauccaUucu.....         | 12 | 1 | S02 |
| .....gacgguggagauccaauuc.....         | 1  | 0 | S02 |
| .....gacgguggagauccaauAu.....         | 1  | 1 | S02 |
| .....gacgguggagauccaauucA.....        | 1  | 1 | S02 |
| .....gacggugAagauccaauuc.....         | 1  | 1 | S02 |
| .....gacgguggagauccaauAuug.....       | 1  | 1 | S02 |
| .....gacgguggagauccaUucug.....        | 1  | 1 | S02 |
| .....Aacgguggagauccaauucg.....        | 2  | 1 | S02 |
| .....gacgguggagauccaUucugg.....       | 61 | 1 | S02 |
| .....gacgguggagauccaauUugg.....       | 1  | 1 | S02 |
| .....gacggugAagauccaauucgg.....       | 1  | 1 | S02 |
| .....Aacgguggagauccaauucgg.....       | 8  | 1 | S02 |
| .....gacgguggagaCccaauucgg.....       | 1  | 1 | S02 |
| .....gacgguggagauccaauAuug.....       | 1  | 1 | S02 |
| .....gacgguggaUauccaauucgg.....       | 1  | 1 | S02 |
| .....gacgguggagauccaauucgg.....       | 12 | 0 | S02 |
| .....gacgguggagauccaauucggauU.....    | 3  | 1 | S02 |
| .....gacgguggagauccaauucggauuc.....   | 8  | 0 | S02 |

## Star

## Mature

|                                                                                                                      |   |   |     |
|----------------------------------------------------------------------------------------------------------------------|---|---|-----|
| uuugauuuuuuuuauaaagagauagauuuugguggaaguccauauugggauuuuccacccguucaucuaaugagauaggacgguggagauccaaucuggaucuccaacaauccaaa |   |   |     |
| .....gacgguggagauccGaucuggauc.....                                                                                   | 1 | 1 | S02 |
| .....gacgguggagauccaaucuggaCc.....                                                                                   | 1 | 1 | S02 |
| .....gacggugUagauccaaucuggauc.....                                                                                   | 1 | 1 | S02 |
| .....acgguggagauccaUucugg.....                                                                                       | 1 | 1 | S02 |
| .....acgguggagauccaaucugg.....                                                                                       | 1 | 0 | S02 |
| .....acgguggagauccaaUugga.....                                                                                       | 1 | 1 | S02 |
| .....acgguggagauccaaucuggauc.....                                                                                    | 1 | 0 | S02 |
| .....acgguggagauccAaauucuggaucu.....                                                                                 | 2 | 1 | S02 |
| .....acgguggagauUcaauucuggaucu.....                                                                                  | 8 | 1 | S02 |
| .....acgguggagauccaaucuggaucu.....                                                                                   | 1 | 0 | S02 |
| .....acgguggagauccaaucuggaCc.....                                                                                    | 2 | 1 | S02 |
| .....acgguggagauccaaucuggauAuc.....                                                                                  | 1 | 1 | S02 |
| .....cgguggagauccAaauucugg.....                                                                                      | 1 | 1 | S02 |
| .....cgguggagauccaaucuggaG.....                                                                                      | 1 | 1 | S02 |
| .....cggugUagauccaaucuggaucu.....                                                                                    | 1 | 1 | S02 |
| .....gguggagauccaaucuggaG.....                                                                                       | 1 | 1 | S02 |
| .....uccaaucuggaucuccaCc.....                                                                                        | 1 | 1 | S02 |

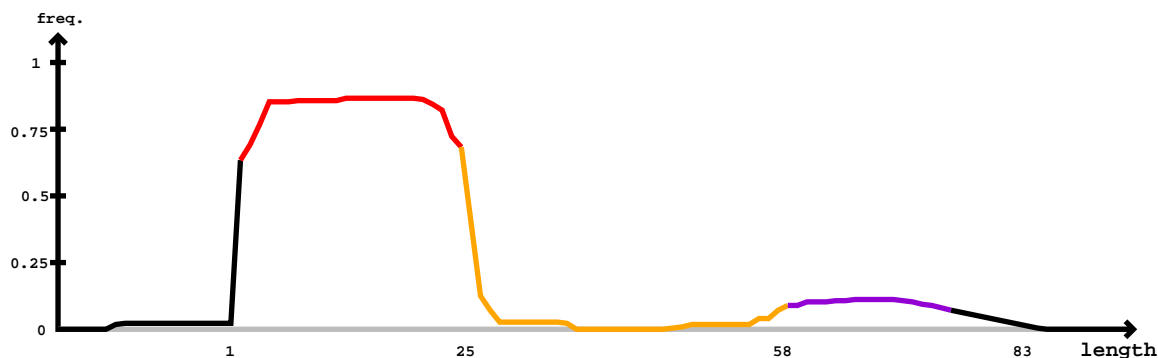

Star

[illegible]

## Mature

## Star

uuaccuuccucccaacauuugacauguauccaggaggaggguacuuuuuguuaaaaacuuuaaacagaaaacaucccuccuccuggacacauaucaaaugcuaggaagggag

|                                      |    |   |     |
|--------------------------------------|----|---|-----|
| ...cuuccucccaacaCuugacaug.....       | 1  | 1 | S02 |
| ...cuuccucccaacaCuugacaugu.....      | 1  | 1 | S02 |
| .....aCuugacauguauccaggga.....       | 1  | 1 | S02 |
| .....aCuugacauguauccaggagg.....      | 2  | 1 | S02 |
| .....aCuugacauguauccaggaggagg.....   | 2  | 1 | S02 |
| .....aCuugacauguauccaggaggaggg.....  | 38 | 1 | S02 |
| .....aCuugacauguauccaggaggagggg..... | 1  | 1 | S02 |
| .....Cuugacauguauccaggaggagg.....    | 7  | 1 | S02 |
| .....uugacauguGuccaggagg.....        | 1  | 1 | S02 |
| .....uugacauguGuccaggaggagggu.....   | 4  | 1 | S02 |
| .....uugacauguauccaggaggagggu.....   | 1  | 0 | S02 |
| .....ugacauguauccaggaggaggA.....     | 1  | 1 | S02 |
| .....ugacauguauccaggaggaggCg.....    | 1  | 1 | S02 |
| .....ugacauguauccaggaggagggg.....    | 2  | 0 | S02 |
| .....ugacauguauccaggaggaggggg.....   | 1  | 0 | S02 |
| .....ugacauguauccaggaggagggggu.....  | 2  | 1 | S02 |
| .....auguGuccaggaggaggagg.....       | 1  | 1 | S02 |
| .....uauccaggAaggggguacuuuugu.....   | 1  | 1 | S02 |
| .....auccaggaggaggggguGeuuuuguu..... | 1  | 1 | S02 |
| .....aacagaaUcauccccucccuggaca.....  | 1  | 1 | S02 |
| .....acagaaauccuccucccuggac.....     | 1  | 0 | S02 |
| .....cagaaUcauccccucccuggacac.....   | 1  | 1 | S02 |
| .....cagaaacaCccccucccuggacac.....   | 1  | 1 | S02 |
| .....aCccccucccuggacaca.....         | 1  | 1 | S02 |
| .....aucccccucccuggacacUu.....       | 1  | 1 | S02 |
| .....aucccccucUcuggacacauauca.....   | 1  | 1 | S02 |
| .....ccccucccuggacacauaucaaGu.....   | 1  | 1 | S02 |
| .....ccucccuggacacauGu.....          | 3  | 1 | S02 |
| .....cucUcuggacacauauca.....         | 1  | 1 | S02 |
| .....cucccuggacacauGucaa.....        | 1  | 1 | S02 |
| .....cucccuggacacauGucaaaugc.....    | 1  | 1 | S02 |
| .....ccuggacacauaucaaaauAcu.....     | 1  | 1 | S02 |
| .....uggacacauaucaaaugcuG.....       | 1  | 1 | S02 |

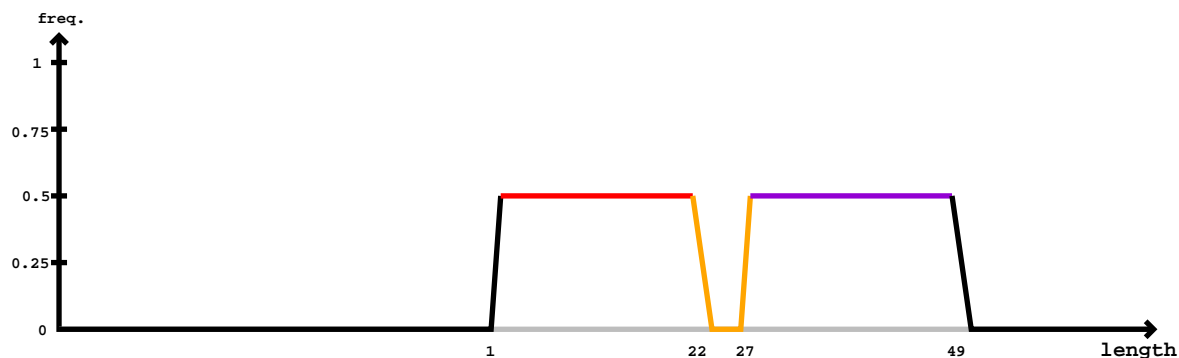

| 5' | uacaagaguu                                                                          | aaggccau | caagaag | uugugcu | caagccaa | uuucagagucuu | acaaggaac | uucuggu | uuauau | uuggcugaga | auuggga | gggu | ugagacac | auagaccuc | -3'   | obs |        |
|----|-------------------------------------------------------------------------------------|----------|---------|---------|----------|--------------|-----------|---------|--------|------------|---------|------|----------|-----------|-------|-----|--------|
|    | uacaagaguu                                                                          | aaggccau | caagaag | uugugcu | caagccaa | uuucagagucuu | acaaggaac | uucuggu | uuauau | uuggcugaga | auuggga | gggu | ugagacac | auagaccuc |       | exp |        |
|    | .....((.((((((((((((.(.((((((.....((.(.(((.....)))..)))..)))..)))..))..)))..)))..)) |          |         |         |          |              |           |         |        |            |         |      |          |           | reads | mm  | sample |
|    | .....uuucagagucuuacaaggaacu.....                                                    |          |         |         |          |              |           |         |        |            |         |      |          |           | 1     | 0   | S01    |
|    | .....guuauauuggcugagaauuggga.....                                                   |          |         |         |          |              |           |         |        |            |         |      |          |           | 1     | 0   | S02    |



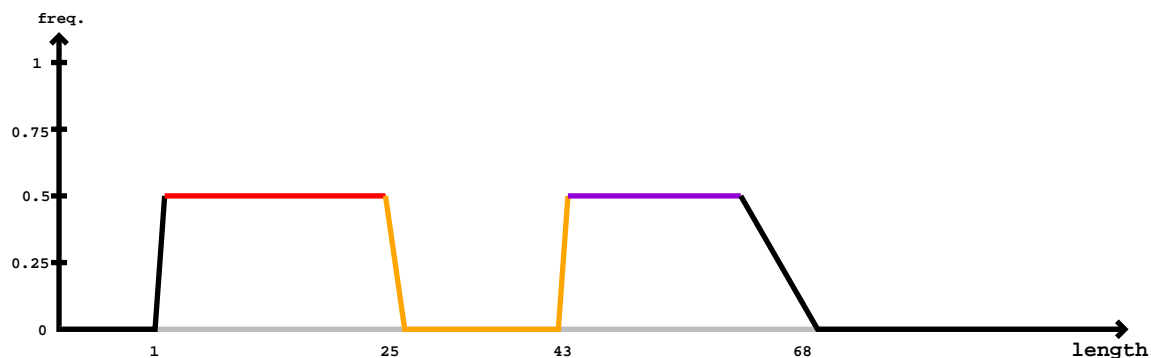

Star

| 5'                                                                                                                                                                                                                                                                                                                                                                                                                                                                   | obs | exp | reads | mm | sample |
|----------------------------------------------------------------------------------------------------------------------------------------------------------------------------------------------------------------------------------------------------------------------------------------------------------------------------------------------------------------------------------------------------------------------------------------------------------------------|-----|-----|-------|----|--------|
| aucauguga <u>uuuguuuuuuuuagaaccu</u> augcu <u>uucgggugucuccu</u> guag <u>caugaucucuacaagcu</u> aa <u>uau</u> guaacuuuuggugagggguuuauagauaucucaccuc<br>aucauguga <u>uuuguuuuuuuuagaaccu</u> augcu <u>uucgggugucuccu</u> guag <u>caugaucucuacaagcu</u> aa <u>uau</u> guaacuuuuggugagggguuuauagauaucucaccuc<br>.....(((.....(((.....(((.....(((.....(((.....))).....)))).....)))).....))).....)).....(((.....(((.....))).....)))).....<br>.....caugaucucuacaagcuaa..... |     |     | 1     | 0  | S01    |
| .....uuuguuuuuuuuagaaccuaugcu.....                                                                                                                                                                                                                                                                                                                                                                                                                                   |     |     | 1     | 0  | S02    |

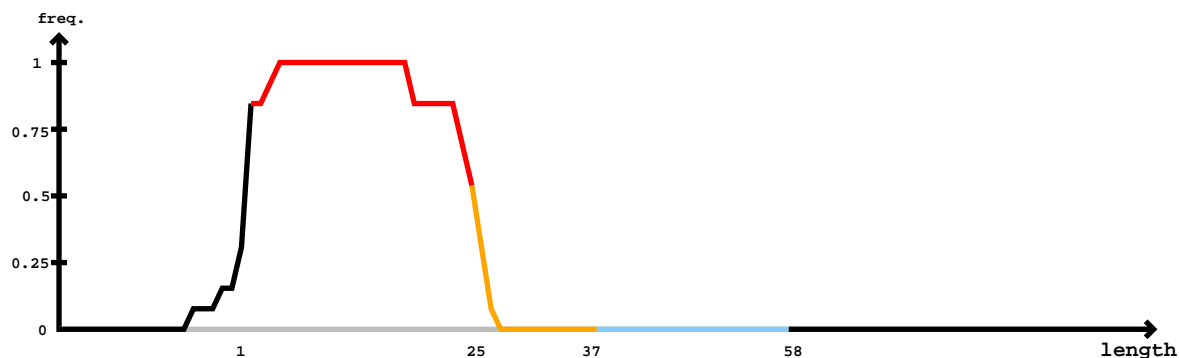

Star

[illegible]

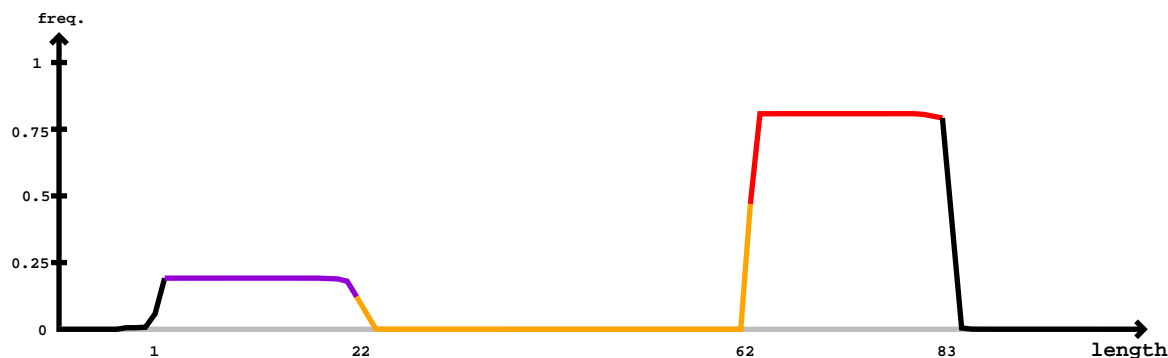

## Mature

[illegible]

## Star

## Mature

|                                                                                                                     |      |   |     |
|---------------------------------------------------------------------------------------------------------------------|------|---|-----|
| agacaaaagacgggggaacagacagagcauggaugcagcuauuaacagucuuuuacuguuuugguuccaccccaugcacugccucuucccugggcucugacuccuuucuccucuc |      |   |     |
| .....acgggggaacagacagagca.....                                                                                      | 15   | 0 | S01 |
| .....acgggggaacagacagagcaC.....                                                                                     | 1    | 1 | S01 |
| .....acgggggaacagacGgagcau.....                                                                                     | 1    | 1 | S01 |
| .....acgggggaacagacagagcau.....                                                                                     | 11   | 0 | S01 |
| .....acAggggaacagacagagcaug.....                                                                                    | 3    | 1 | S01 |
| .....acgggggaacagacagagcGug.....                                                                                    | 7    | 1 | S01 |
| .....acgggggaacagacagaUcaug.....                                                                                    | 2    | 1 | S01 |
| .....acgggggaacagacagagcCug.....                                                                                    | 1    | 1 | S01 |
| .....acgggggaacagacagagGaug.....                                                                                    | 2    | 1 | S01 |
| .....acgggggaacagacagagcauU.....                                                                                    | 7    | 1 | S01 |
| .....acggggAaacagacagagcaug.....                                                                                    | 1    | 1 | S01 |
| .....acgggggaacagacagagcauA.....                                                                                    | 53   | 1 | S01 |
| .....acgggggaAagacagagcaug.....                                                                                     | 1    | 1 | S01 |
| .....acgggggCacagacagagcaug.....                                                                                    | 3    | 1 | S01 |
| .....acgggggaacagacagcGcgaug.....                                                                                   | 2    | 1 | S01 |
| .....acgggggaacagagGagagcaug.....                                                                                   | 1    | 1 | S01 |
| .....aUgggggaacagacagagcaug.....                                                                                    | 5    | 1 | S01 |
| .....acgCggaacagacagagcaug.....                                                                                     | 1    | 1 | S01 |
| .....acgggggaacGgacagagcaug.....                                                                                    | 5    | 1 | S01 |
| .....Ucgggggaacagacagagcaug.....                                                                                    | 1    | 1 | S01 |
| .....acgggggaacagCagagcaug.....                                                                                     | 1    | 1 | S01 |
| .....aAggggaacagacagagcaug.....                                                                                     | 1    | 1 | S01 |
| .....acgggggaagagacagagcaug.....                                                                                    | 1    | 1 | S01 |
| .....acgggggaacagGcagagcaug.....                                                                                    | 4    | 1 | S01 |
| .....Gcgggggaacagacagagcaug.....                                                                                    | 5    | 1 | S01 |
| .....acgggggaacagagAagagcaug.....                                                                                   | 2    | 1 | S01 |
| .....acgggggaacagacagAagcaug.....                                                                                   | 4    | 1 | S01 |
| .....acgggggaGcagacagagcaug.....                                                                                    | 8    | 1 | S01 |
| .....acgggggaacagacagagcaug.....                                                                                    | 1046 | 0 | S01 |
| .....acgggggaacagacagUagcaug.....                                                                                   | 1    | 1 | S01 |
| .....acgggggaacagacagUgcaug.....                                                                                    | 1    | 1 | S01 |
| .....acgggggaacagacagGgcaug.....                                                                                    | 5    | 1 | S01 |
| .....acgggggaacagacagagUaug.....                                                                                    | 2    | 1 | S01 |
| .....acgggggaacaCacagagcaug.....                                                                                    | 1    | 1 | S01 |
| .....acgggggaacaAacagagcaug.....                                                                                    | 2    | 1 | S01 |
| .....acgggggaacagagUagagcaug.....                                                                                   | 1    | 1 | S01 |
| .....acgggggGacagacagagcaug.....                                                                                    | 1    | 1 | S01 |
| .....Ncgggggaacagacagagcaug.....                                                                                    | 1    | 1 | S01 |
| .....acgUggaacagacagagcaug.....                                                                                     | 5    | 1 | S01 |
| .....acgggggaacagacagagAcaug.....                                                                                   | 1    | 1 | S01 |
| .....acggggCaacagacagagcaug.....                                                                                    | 2    | 1 | S01 |
| .....acgggggaacagacGgagcaug.....                                                                                    | 4    | 1 | S01 |
| .....acgggggaacagacagagcaGg.....                                                                                    | 1    | 1 | S01 |
| .....acgAggaacagacagagcaug.....                                                                                     | 2    | 1 | S01 |
| .....acgggggaacagacCgagcaug.....                                                                                    | 1    | 1 | S01 |
| .....acgggggaacagacagagcaCg.....                                                                                    | 11   | 1 | S01 |
| .....acgggggaacagacagagcaugg.....                                                                                   | 5    | 0 | S01 |
| .....Ccgggggaacagacagagcaugg.....                                                                                   | 1    | 1 | S01 |
| .....acgggggaacagacagagcaugU.....                                                                                   | 4    | 1 | S01 |
| .....acgggggaacagacagagcaugA.....                                                                                   | 3    | 1 | S01 |
| .....acgggggaacagacagagcaugC.....                                                                                   | 1    | 1 | S01 |
| .....acgggggaacagacagagcaugUa.....                                                                                  | 1    | 1 | S01 |
| .....acgggggaacagacagagcauggUu.....                                                                                 | 1    | 1 | S01 |
| .....acgggggaacagacagagcaugggaug.....                                                                               | 1    | 0 | S01 |
| .....acgggggaacagacagagcauggaugU.....                                                                               | 1    | 1 | S01 |
| .....cgggggCacagacagagca.....                                                                                       | 1    | 1 | S01 |
| .....cgggggaacGgacagagca.....                                                                                       | 1    | 1 | S01 |
| .....cgggggaacagacagagca.....                                                                                       | 16   | 0 | S01 |
| .....cgggggaacagacagagcG.....                                                                                       | 1    | 1 | S01 |
| .....cgggggaacagacagagUcau.....                                                                                     | 1    | 1 | S01 |
| .....cgggggaacagacagagcaG.....                                                                                      | 7    | 1 | S01 |
| .....cgggggCacagacagagcau.....                                                                                      | 1    | 1 | S01 |
| .....cgggggaacagacagagAau.....                                                                                      | 1    | 1 | S01 |
| .....cgggggaacagGcagagcau.....                                                                                      | 1    | 1 | S01 |
| .....cgggggaacagacagagcaC.....                                                                                      | 15   | 1 | S01 |
| .....cggUgaacagacagagcau.....                                                                                       | 2    | 1 | S01 |
| .....cggggaGcagacagagcau.....                                                                                       | 1    | 1 | S01 |
| .....cgggggaacagacagagcau.....                                                                                      | 169  | 0 | S01 |
| .....cgggggaagagacagagcau.....                                                                                      | 1    | 1 | S01 |
| .....cgggggaacagacUgagcau.....                                                                                      | 1    | 1 | S01 |

## Star

## Mature

agacaaaagacgggggaacagacagagcauggaugcagcuauuaacagucuuuuacuguuuugguuccaccccaugacacugccucucccugggcucugacuccuuucucuccuc

|                                  |     |   |     |
|----------------------------------|-----|---|-----|
| .....cgggggaacagacagagcaA.....   | 5   | 1 | S01 |
| .....cgggggaacagacGgagcau.....   | 1   | 1 | S01 |
| .....cgggggaacagacGgagcaug.....  | 2   | 1 | S01 |
| .....cgggggaacagacagagcGug.....  | 2   | 1 | S01 |
| .....cgggggaacagacUgagcaug.....  | 1   | 1 | S01 |
| .....cggAGaacagacagagcaug.....   | 1   | 1 | S01 |
| .....cgggggaacagacagGgcaug.....  | 2   | 1 | S01 |
| .....cgggggaacagacagagcaGg.....  | 1   | 1 | S01 |
| .....cgggggaacagacagagcaCG.....  | 1   | 1 | S01 |
| .....cgggggaacagacagagcauU.....  | 5   | 1 | S01 |
| .....Agggggaacagacagagcaug.....  | 1   | 1 | S01 |
| .....cgggggCacagacagagcaug.....  | 1   | 1 | S01 |
| .....cgggggGacagacagagcaug.....  | 1   | 1 | S01 |
| .....cgggggaacagacagagcaug.....  | 106 | 0 | S01 |
| .....cgggggaacagacagagcauA.....  | 6   | 1 | S01 |
| .....cgggggaGcagacagagcaug.....  | 3   | 1 | S01 |
| .....cgggggaacagacUgagcaugg..... | 4   | 1 | S01 |
| .....cgggggaacagUcagagcaugg..... | 4   | 1 | S01 |
| .....cgggggaacagAagagcaugg.....  | 1   | 1 | S01 |
| .....cggCGaacagacagagcaugg.....  | 2   | 1 | S01 |
| .....cgAGgaacagacagagcaugg.....  | 3   | 1 | S01 |
| .....cgggggaacagacagagcauA.....  | 190 | 1 | S01 |
| .....cgggggaacagagagagcaugg..... | 1   | 1 | S01 |
| .....Agggggaacagacagagcaugg..... | 2   | 1 | S01 |
| .....cgggggaacagacGgagcaugg..... | 12  | 1 | S01 |
| .....cgggggaacagauagagcaugg..... | 4   | 1 | S01 |
| .....cgggggaacagacagagcaugU..... | 35  | 1 | S01 |
| .....cgggggaacUgacagagcaugg..... | 5   | 1 | S01 |
| .....cgggggaAagacagagcaugg.....  | 9   | 1 | S01 |
| .....cgggAaacagacagagcaugg.....  | 2   | 1 | S01 |
| .....cgggggaacaUacagagcaugg..... | 2   | 1 | S01 |
| .....cgggggaacagacagagcaGgg..... | 5   | 1 | S01 |
| .....cgggggaacagGcagagcaugg..... | 10  | 1 | S01 |
| .....cgggggaagagacagagcaugg..... | 2   | 1 | S01 |
| .....cgggggaacagacagagUaugg..... | 2   | 1 | S01 |
| .....cgggggaauagacagagcaugg..... | 5   | 1 | S01 |
| .....cgggggaacagacagagcGugg..... | 10  | 1 | S01 |
| .....cgUgggaacagacagagcaugg..... | 1   | 1 | S01 |
| .....cGgggaacagacagagcaugg.....  | 5   | 1 | S01 |
| .....cgggggaacagacagagcCugg..... | 3   | 1 | S01 |
| .....cgggUaacagacagagcaugg.....  | 1   | 1 | S01 |
| .....cgggggUacagacagagcaugg..... | 4   | 1 | S01 |
| .....cgggggaacagacagagcauAg..... | 2   | 1 | S01 |
| .....cgggggaacagacagagcaugC..... | 16  | 1 | S01 |
| .....cgggggaacagacagUgcaugg..... | 4   | 1 | S01 |
| .....cgggggaacagacaAgcgaugg..... | 3   | 1 | S01 |
| .....cgggggaacagacagagcaAgg..... | 4   | 1 | S01 |
| .....Ngggggaacagacagagcaugg..... | 1   | 1 | S01 |
| .....cgggggaacagacagaCcaugg..... | 1   | 1 | S01 |
| .....cUggggaacagacagagcaugg..... | 1   | 1 | S01 |
| .....cgggggaacaAacagagcaugg..... | 2   | 1 | S01 |
| .....cggUgaacagacagagcaugg.....  | 17  | 1 | S01 |
| .....cgggggaacagacaUagcaugg..... | 1   | 1 | S01 |
| .....cgggggaacagacagagcauUg..... | 1   | 1 | S01 |
| .....Ggggggaacagacagagcaugg..... | 2   | 1 | S01 |
| .....cgggggaacagacagagcUugg..... | 1   | 1 | S01 |
| .....cgggggaacagacagaUcaugg..... | 2   | 1 | S01 |
| .....cgggggCacagacagagcaugg..... | 2   | 1 | S01 |
| .....cgggggaacagacagagGaugg..... | 5   | 1 | S01 |
| .....cgggggaacagacagagcauCG..... | 8   | 1 | S01 |
| .....cggggCaacagacagagcaugg..... | 1   | 1 | S01 |
| .....cAggggaacagacagagcaugg..... | 2   | 1 | S01 |
| .....cgggggGacagacagagcaugg..... | 17  | 1 | S01 |
| .....Ugggggaacagacagagcaugg..... | 4   | 1 | S01 |
| .....cgggggaGcagacagagcaugg..... | 7   | 1 | S01 |
| .....cgggggaacagacagaAcaugg..... | 7   | 1 | S01 |
| .....cgggggaacagacagGgcaugg..... | 14  | 1 | S01 |
| .....cggAGaacagacagagcaugg.....  | 5   | 1 | S01 |
| .....cgggggaUcagacagagcaugg..... | 1   | 1 | S01 |
| .....cgggggaacGgacagagcaugg..... | 10  | 1 | S01 |

| Star                                                                                                              | Mature |   |     |
|-------------------------------------------------------------------------------------------------------------------|--------|---|-----|
| agacaaaagacggggaacagacagagcauggaugcagcuauuaacagucuuuuacuguuuugguuccacccaugcacugccucuucccugggcucugacuccuuucucuccuc |        |   |     |
| .....cggggaacagacCgagcaugg.....                                                                                   | 3      | 1 | S01 |
| .....cggggaacagacagagcaCgg.....                                                                                   | 6      | 1 | S01 |
| .....cggggaacagacagagcaugg.....                                                                                   | 2752   | 0 | S01 |
| .....cggAgaacagacagagcaugga.....                                                                                  | 1      | 1 | S01 |
| .....cggggaacagacagagcauggG.....                                                                                  | 2      | 1 | S01 |
| .....cggggaaUagacagagcaugga.....                                                                                  | 1      | 1 | S01 |
| .....cggggaacagacagagcauggU.....                                                                                  | 9      | 1 | S01 |
| .....cggggaacagacagagcaugga.....                                                                                  | 5      | 0 | S01 |
| .....cggggaacagacagagcauggC.....                                                                                  | 2      | 1 | S01 |
| .....cggggaacagacagagcauggUu.....                                                                                 | 2      | 1 | S01 |
| .....cggggaacagacagagcauggau.....                                                                                 | 2      | 0 | S01 |
| .....cggggaacagacagagcauggaug.....                                                                                | 1      | 0 | S01 |
| .....Cgggaacagacagagcaug.....                                                                                     | 1      | 1 | S01 |
| .....Cgggaacagacagagcaugg.....                                                                                    | 1      | 1 | S01 |
| .....ggaacagacagagcaugaA.....                                                                                     | 1      | 1 | S01 |
| .....ggaacagacagagcaugg.....                                                                                      | 1      | 0 | S01 |
| .....ggaacagacagagcauggaug.....                                                                                   | 1      | 0 | S01 |
| .....cagacagagcauggaugcagc.....                                                                                   | 1      | 0 | S01 |
| .....cagagcauggaugcagcuauuaaca.....                                                                               | 1      | 0 | S01 |
| .....uggaugcagcuauuaaca.....                                                                                      | 1      | 0 | S01 |
| .....cAaugcacugccucuuccc.....                                                                                     | 1      | 1 | S01 |
| .....caugcacugccucuucccuggc.....                                                                                  | 3      | 0 | S01 |
| .....augcacugccucuucccA.....                                                                                      | 1      | 1 | S01 |
| .....augcacuUccucuuccc.....                                                                                       | 1      | 1 | S01 |
| .....augUacugccucuuccc.....                                                                                       | 1      | 1 | S01 |
| .....augcacugccucuCccu.....                                                                                       | 1      | 1 | S01 |
| .....augcacugccucuuccc.....                                                                                       | 55     | 0 | S01 |
| .....augcacugUcucuuccc.....                                                                                       | 1      | 1 | S01 |
| .....augcacugccucuucccC.....                                                                                      | 6      | 1 | S01 |
| .....augcacugccucuucccG.....                                                                                      | 2      | 1 | S01 |
| .....augcacCgccucuuccc.....                                                                                       | 1      | 1 | S01 |
| .....augcacugccucuucccuU.....                                                                                     | 3      | 1 | S01 |
| .....augcacugccucuucccCg.....                                                                                     | 1      | 1 | S01 |
| .....augcacugccucuucccug.....                                                                                     | 9      | 0 | S01 |
| .....augcacuUccucuucccug.....                                                                                     | 1      | 1 | S01 |
| .....augcacugccucuucccuA.....                                                                                     | 2      | 1 | S01 |
| .....augcacugccucuucccGgg.....                                                                                    | 1      | 1 | S01 |
| .....augcacugccucuucccugU.....                                                                                    | 3      | 1 | S01 |
| .....augcacugccucuucccugC.....                                                                                    | 4      | 1 | S01 |
| .....augcacugccucuucccugg.....                                                                                    | 19     | 0 | S01 |
| .....Gugcacugccucuucccuggc.....                                                                                   | 35     | 1 | S01 |
| .....augcacugccucuucccCggc.....                                                                                   | 36     | 1 | S01 |
| .....augcacugccucuuAcccuggc.....                                                                                  | 10     | 1 | S01 |
| .....augcaUugccucuucccuggc.....                                                                                   | 10     | 1 | S01 |
| .....augcacugccucGucccuggc.....                                                                                   | 3      | 1 | S01 |
| .....augcacugccucuuGcccuggc.....                                                                                  | 6      | 1 | S01 |
| .....aGgcacugccucuucccuggc.....                                                                                   | 6      | 1 | S01 |
| .....augcacuUccucuucccuggc.....                                                                                   | 14     | 1 | S01 |
| .....augcacugccuUuucccuggc.....                                                                                   | 6      | 1 | S01 |
| .....augcacugccucuuGcuggc.....                                                                                    | 13     | 1 | S01 |
| .....augGacugccucuucccuggc.....                                                                                   | 21     | 1 | S01 |
| .....augcacugccucuucccuggU.....                                                                                   | 1680   | 1 | S01 |
| .....augcacugccucuucccuggA.....                                                                                   | 386    | 1 | S01 |
| .....Nugcacugccucuucccuggc.....                                                                                   | 6      | 1 | S01 |
| .....augcacugccucuucccGggc.....                                                                                   | 8      | 1 | S01 |
| .....augcGcugccucuucccuggc.....                                                                                   | 36     | 1 | S01 |
| .....augcacugccucCucccuggc.....                                                                                   | 51     | 1 | S01 |
| .....augcacugccucuuCacuggc.....                                                                                   | 10     | 1 | S01 |
| .....augcaGugccucuucccuggc.....                                                                                   | 18     | 1 | S01 |
| .....augcCcugccucuucccuggc.....                                                                                   | 12     | 1 | S01 |
| .....augcacugccucuuCcguggc.....                                                                                   | 10     | 1 | S01 |
| .....augcacugccucuuCcguggc.....                                                                                   | 10     | 1 | S01 |
| .....Cugcacugccucuucccuggc.....                                                                                   | 5      | 1 | S01 |
| .....augcacGgccucuucccuggc.....                                                                                   | 9      | 1 | S01 |
| .....augcacCgccucuucccuggc.....                                                                                   | 37     | 1 | S01 |
| .....auAcacugccucuucccuggc.....                                                                                   | 22     | 1 | S01 |
| .....augcacugccucuuAcccuggc.....                                                                                  | 6      | 1 | S01 |
| .....augcacugcGucuucccuggc.....                                                                                   | 19     | 1 | S01 |
| .....augcacugcUucuucccuggc.....                                                                                   | 23     | 1 | S01 |
| .....augcacugccucuucccuCgc.....                                                                                   | 7      | 1 | S01 |

## Star

## Mature

|                                                                                                                 |       |   |     |
|-----------------------------------------------------------------------------------------------------------------|-------|---|-----|
| agacaaaagacggggaacagacagagcauggaugcagcuauuaacagucuuuuacuguuuugguuccacccaugcacugccucuucccuggcucugacucuuucucuccuc |       |   |     |
| .....augcacugcAucuucccuggc.....                                                                                 | 15    | 1 | S01 |
| .....aCgcacugccucuucccuggc.....                                                                                 | 40    | 1 | S01 |
| .....aAgcacugccucuucccuggc.....                                                                                 | 11    | 1 | S01 |
| .....augcacugccucuucccAggc.....                                                                                 | 14    | 1 | S01 |
| .....augcacugccGcucccuggc.....                                                                                  | 10    | 1 | S01 |
| .....augcacugccucuucccugCc.....                                                                                 | 8     | 1 | S01 |
| .....augcacAgccucuucccuggc.....                                                                                 | 15    | 1 | S01 |
| .....Uugcacugccucuucccuggc.....                                                                                 | 7     | 1 | S01 |
| .....augcacugccucuucccUgc.....                                                                                  | 20    | 1 | S01 |
| .....augcacugccucuucccugUc.....                                                                                 | 9     | 1 | S01 |
| .....augcaAugccucuucccuggc.....                                                                                 | 10    | 1 | S01 |
| .....augcacugccuAuucccuggc.....                                                                                 | 12    | 1 | S01 |
| .....augcacugAcucuucccuggc.....                                                                                 | 19    | 1 | S01 |
| .....augcacugccucuucccuggc.....                                                                                 | 10460 | 0 | S01 |
| .....auUcacugccucuucccuggc.....                                                                                 | 3     | 1 | S01 |
| .....augcacugccucuucccuggG.....                                                                                 | 39    | 1 | S01 |
| .....augcacugccucuuUccuggc.....                                                                                 | 10    | 1 | S01 |
| .....augcacugccucuucccUuggc.....                                                                                | 9     | 1 | S01 |
| .....augcacugccucuuGcccuggc.....                                                                                | 9     | 1 | S01 |
| .....augcacugccucuucccugAc.....                                                                                 | 25    | 1 | S01 |
| .....augcacugccucuucccUgc.....                                                                                  | 7     | 1 | S01 |
| .....augcacugccCcucccuggc.....                                                                                  | 38    | 1 | S01 |
| .....augAacugccucuucccuggc.....                                                                                 | 7     | 1 | S01 |
| .....augcacugccAcuucccuggc.....                                                                                 | 9     | 1 | S01 |
| .....augcacugccucuuCcccuggc.....                                                                                | 29    | 1 | S01 |
| .....augcacugGcucuucccuggc.....                                                                                 | 13    | 1 | S01 |
| .....auCcacugccucuucccuggc.....                                                                                 | 4     | 1 | S01 |
| .....augcacugccucAucccuggc.....                                                                                 | 7     | 1 | S01 |
| .....augcacugccucuuUcuggc.....                                                                                  | 15    | 1 | S01 |
| .....augUacugccucuucccuggc.....                                                                                 | 21    | 1 | S01 |
| .....augcacugUcucuucccuggc.....                                                                                 | 20    | 1 | S01 |
| .....augcacuAccucuucccuggc.....                                                                                 | 25    | 1 | S01 |
| .....augcacuCccucuucccuggc.....                                                                                 | 18    | 1 | S01 |
| .....augcUcugccucuucccuggc.....                                                                                 | 6     | 1 | S01 |
| .....augcacugccuGuucccuggc.....                                                                                 | 10    | 1 | S01 |
| .....augcacugccucuucccuggcG.....                                                                                | 2     | 1 | S01 |
| .....augcacugccucuucccuggcA.....                                                                                | 1     | 1 | S01 |
| .....augcacugccucuucccuggcu.....                                                                                | 2     | 0 | S01 |
| .....augcacugccucuucccuggcCcug.....                                                                             | 1     | 1 | S01 |
| .....ugcacugccucuucccuU.....                                                                                    | 26    | 1 | S01 |
| .....ugcaUugccucuucccug.....                                                                                    | 2     | 1 | S01 |
| .....ugcacugAcucuucccug.....                                                                                    | 1     | 1 | S01 |
| .....ugcacAgccucuucccug.....                                                                                    | 1     | 1 | S01 |
| .....ugcacugcUucuucccug.....                                                                                    | 1     | 1 | S01 |
| .....ugcacuAccucuucccug.....                                                                                    | 1     | 1 | S01 |
| .....uAacugccucuucccug.....                                                                                     | 1     | 1 | S01 |
| .....Ggcacugccucuucccug.....                                                                                    | 1     | 1 | S01 |
| .....ugcacuUccucuucccug.....                                                                                    | 1     | 1 | S01 |
| .....ugcacugcAucuucccug.....                                                                                    | 1     | 1 | S01 |
| .....ugcacugccucuucccug.....                                                                                    | 122   | 0 | S01 |
| .....ugcacGccucuucccug.....                                                                                     | 3     | 1 | S01 |
| .....ugcacugccucuucccCg.....                                                                                    | 1     | 1 | S01 |
| .....ugcacugccucCucccug.....                                                                                    | 1     | 1 | S01 |
| .....Agcacugccucuucccug.....                                                                                    | 1     | 1 | S01 |
| .....ugcacugccucuucccuA.....                                                                                    | 8     | 1 | S01 |
| .....ugcacugccucuucccuC.....                                                                                    | 7     | 1 | S01 |
| .....ugcacugccucuuccGug.....                                                                                    | 1     | 1 | S01 |
| .....uAacugccucuucccugg.....                                                                                    | 1     | 1 | S01 |
| .....ugcacugccucuucccuAg.....                                                                                   | 2     | 1 | S01 |
| .....ugcacugccucuucccugA.....                                                                                   | 9     | 1 | S01 |
| .....ugcacugccucuucccugU.....                                                                                   | 50    | 1 | S01 |
| .....ugcacAgccucuucccugg.....                                                                                   | 1     | 1 | S01 |
| .....ugcacugccucuuCcccugg.....                                                                                  | 1     | 1 | S01 |
| .....ugcacugccAcuucccugg.....                                                                                   | 1     | 1 | S01 |
| .....ugcUcugccucuucccugg.....                                                                                   | 1     | 1 | S01 |
| .....ugcacugccucuucccugg.....                                                                                   | 92    | 0 | S01 |
| .....Ggcacugccucuucccugg.....                                                                                   | 1     | 1 | S01 |
| .....ugcacugccuGuucccugg.....                                                                                   | 1     | 1 | S01 |
| .....ugcacugccucuucccugC.....                                                                                   | 9     | 1 | S01 |
| .....ugcGcugccucuucccugg.....                                                                                   | 1     | 1 | S01 |

## Star

## Mature

agacaaaagacggggaacagacagagcauggaugcagcuauuaacagucuuuuacuguuuugguuccaccccaugcacugccucuucccugggcucugacucuuucucuccuc

|                                  |      |   |     |
|----------------------------------|------|---|-----|
| .....ugcacugcUucuucccugg.....    | 1    | 1 | S01 |
| .....ugcacugccucuaAcccuggc.....  | 1    | 1 | S01 |
| .....ugUacugccucuucccuggc.....   | 10   | 1 | S01 |
| .....ugcacugccucuucccugAc.....   | 17   | 1 | S01 |
| .....ugcacugccucuuUccuggc.....   | 6    | 1 | S01 |
| .....ugcacugccucuucccGggc.....   | 4    | 1 | S01 |
| .....ugcacugccucuucccUgc.....    | 4    | 1 | S01 |
| .....ugcacugccuAuucccuggc.....   | 5    | 1 | S01 |
| .....uUcacugccucuucccuggc.....   | 5    | 1 | S01 |
| .....ugcacugccucUcccuggc.....    | 18   | 1 | S01 |
| .....ugcacugccucGucccuggc.....   | 8    | 1 | S01 |
| .....ugGacugccucuucccuggc.....   | 5    | 1 | S01 |
| .....ugcacugccucUcccuggc.....    | 16   | 1 | S01 |
| .....ugcGcugccucuucccuggc.....   | 32   | 1 | S01 |
| .....ugcacugcUucuucccuggc.....   | 5    | 1 | S01 |
| .....ugcacugccuGuucccuggc.....   | 3    | 1 | S01 |
| .....ugcUcugccucuucccuggc.....   | 7    | 1 | S01 |
| .....ugcacugccucuuGcuggc.....    | 3    | 1 | S01 |
| .....ugcacugcAucuucccuggc.....   | 7    | 1 | S01 |
| .....ugcaAugccucuucccuggc.....   | 2    | 1 | S01 |
| .....ugcacugccucuuGcuggc.....    | 7    | 1 | S01 |
| .....ugcacugccGcuucccuggc.....   | 6    | 1 | S01 |
| .....ugcacCgcccucuucccuggc.....  | 17   | 1 | S01 |
| .....ugcacugccucuuAccuggc.....   | 9    | 1 | S01 |
| .....Cgcacugccucuucccuggc.....   | 18   | 1 | S01 |
| .....ugcCcugccucuucccuggc.....   | 8    | 1 | S01 |
| .....ugcacugccucuucccuggG.....   | 23   | 1 | S01 |
| .....ugAacugccucuucccuggc.....   | 7    | 1 | S01 |
| .....ugcacugccucuucccuggA.....   | 194  | 1 | S01 |
| .....ugcacugAcucuucccuggc.....   | 19   | 1 | S01 |
| .....ugcaUugccucuucccuggc.....   | 3    | 1 | S01 |
| .....ugcacugccucuuUcuggc.....    | 12   | 1 | S01 |
| .....uCcacugccucuucccuggc.....   | 4    | 1 | S01 |
| .....ugcacGgcccucuucccuggc.....  | 3    | 1 | S01 |
| .....ugcacugccAcuucccuggc.....   | 8    | 1 | S01 |
| .....ugcacugccucuuUcuggc.....    | 10   | 1 | S01 |
| .....ugcacugccucuucccugCc.....   | 9    | 1 | S01 |
| .....ugcacuAccucuucccuggc.....   | 18   | 1 | S01 |
| .....ugcacAgccucuucccuggc.....   | 10   | 1 | S01 |
| .....ugcacugccucuucccuggU.....   | 890  | 1 | S01 |
| .....ugcacugccucuuUccAggc.....   | 11   | 1 | S01 |
| .....ugcacugccCuucccuggc.....    | 16   | 1 | S01 |
| .....ugcacugccucUgcccuggc.....   | 6    | 1 | S01 |
| .....ugcacugccucuuAcuggc.....    | 4    | 1 | S01 |
| .....ugcacugccuAuucccuggc.....   | 6    | 1 | S01 |
| .....ugcacugcGucuucccuggc.....   | 4    | 1 | S01 |
| .....ugcacugccuUuucccuggc.....   | 9    | 1 | S01 |
| .....ugcacUccucuucccuggc.....    | 9    | 1 | S01 |
| .....ugcacugccucuucccugUc.....   | 10   | 1 | S01 |
| .....ugcacugccucuuUccCggc.....   | 20   | 1 | S01 |
| .....ugcacugGcucuucccuggc.....   | 8    | 1 | S01 |
| .....Ggcacugccucuucccuggc.....   | 5    | 1 | S01 |
| .....ugcacugccucuuUccCgc.....    | 2    | 1 | S01 |
| .....ugcacuCcucuucccuggc.....    | 5    | 1 | S01 |
| .....uAcacugccucuucccuggc.....   | 16   | 1 | S01 |
| .....ugcacugccucuuUccAuggc.....  | 5    | 1 | S01 |
| .....ugcacugccucuucccuggc.....   | 5391 | 0 | S01 |
| .....ugcacugUcucuucccuggc.....   | 8    | 1 | S01 |
| .....ugcacugccucuuUccuAgc.....   | 9    | 1 | S01 |
| .....Ngcacugccucuucccuggc.....   | 5    | 1 | S01 |
| .....Agcacugccucuucccuggc.....   | 12   | 1 | S01 |
| .....ugcacugccucuuUccuAgcu.....  | 2    | 1 | S01 |
| .....ugcacugccCuucccuggcu.....   | 4    | 1 | S01 |
| .....ugcacugccucuuAcuggcu.....   | 1    | 1 | S01 |
| .....ugcacugccuAuucccuggcu.....  | 2    | 1 | S01 |
| .....ugcacCgcccucuucccuggcu..... | 4    | 1 | S01 |
| .....ugcacugUcucuucccuggcu.....  | 4    | 1 | S01 |
| .....ugcacugccuGuucccuggcu.....  | 1    | 1 | S01 |
| .....Ggcacugccucuucccuggcu.....  | 3    | 1 | S01 |
| .....ugcacuUccucuucccuggcu.....  | 6    | 1 | S01 |



## Star

## Mature

|                                                                                                                    |      |   |     |
|--------------------------------------------------------------------------------------------------------------------|------|---|-----|
| agacaaaagacgggggaacagacagagcauggaugcagcuauuaacagucuuuuacuguuuugguuccacccaugcacugccucuucccugggcucugacuccuuucucuccuc |      |   |     |
| .....ugcacugccucuucccGuggcu.....                                                                                   | 3    | 1 | S01 |
| .....ugcacugccucuucccAggcu.....                                                                                    | 4    | 1 | S01 |
| .....ugcacugccucuuUccuggcu.....                                                                                    | 1    | 1 | S01 |
| .....ugcacugccGcuuucccuggcu.....                                                                                   | 1    | 1 | S01 |
| .....ugcacugccucuuUcuggcu.....                                                                                     | 4    | 1 | S01 |
| .....ugcacugcGcuuucccuggcu.....                                                                                    | 3    | 1 | S01 |
| .....ugcacugcUcuuucccuggcu.....                                                                                    | 3    | 1 | S01 |
| .....ugcacugccucuucccugCcu.....                                                                                    | 1    | 1 | S01 |
| .....ugcacugccucuaAcccuggcu.....                                                                                   | 3    | 1 | S01 |
| .....ugUacugccucuuucccuggcu.....                                                                                   | 3    | 1 | S01 |
| .....Ngcacugccucuuucccuggcu.....                                                                                   | 1    | 1 | S01 |
| .....uAcacugccucuuucccuggcu.....                                                                                   | 3    | 1 | S01 |
| .....ugcacugccucuuucccuggcu.....                                                                                   | 1479 | 0 | S01 |
| .....ugcGcugccucuuucccuggcu.....                                                                                   | 9    | 1 | S01 |
| .....ugcacugccucuuucccugAcu.....                                                                                   | 4    | 1 | S01 |
| .....ugcacugccucuuuccAuggcu.....                                                                                   | 3    | 1 | S01 |
| .....ugcacugAcucuuucccuggcu.....                                                                                   | 6    | 1 | S01 |
| .....ugcacugccuUuuucccuggcu.....                                                                                   | 1    | 1 | S01 |
| .....ugcacugccucuuucccuggUu.....                                                                                   | 9    | 1 | S01 |
| .....Agcacugccucuuucccuggcu.....                                                                                   | 4    | 1 | S01 |
| .....ugcaUugccucuuucccuggcu.....                                                                                   | 4    | 1 | S01 |
| .....uUcacugccucuuucccuggcu.....                                                                                   | 1    | 1 | S01 |
| .....ugcacugccucuuGccuggcu.....                                                                                    | 1    | 1 | S01 |
| .....ugcacugccucuuucccuggcG.....                                                                                   | 47   | 1 | S01 |
| .....ugcCcugccucuuucccuggcu.....                                                                                   | 1    | 1 | S01 |
| .....ugcacugccucGucccuggcu.....                                                                                    | 3    | 1 | S01 |
| .....ugcacugccucuuucccuggcC.....                                                                                   | 190  | 1 | S01 |
| .....ugcacugccucuCcccuggcu.....                                                                                    | 1    | 1 | S01 |
| .....ugcacugccucugcccuggcu.....                                                                                    | 1    | 1 | S01 |
| .....ugcacuCccucuuucccuggcu.....                                                                                   | 3    | 1 | S01 |
| .....ugcacAgccucuuucccuggcu.....                                                                                   | 3    | 1 | S01 |
| .....ugcacugccucCucccuggcu.....                                                                                    | 6    | 1 | S01 |
| .....ugcacuAccucuuucccuggcu.....                                                                                   | 7    | 1 | S01 |
| .....ugcacugccucuucccGggcu.....                                                                                    | 2    | 1 | S01 |
| .....ugcacugccucuuucccuggcA.....                                                                                   | 72   | 1 | S01 |
| .....uCcacugccucuuucccuggcu.....                                                                                   | 1    | 1 | S01 |
| .....ugcacugccucuuuccUuggcu.....                                                                                   | 1    | 1 | S01 |
| .....ugcacugGcucuuucccuggcu.....                                                                                   | 1    | 1 | S01 |
| .....Cgcacugccucuuucccuggcu.....                                                                                   | 5    | 1 | S01 |
| .....ugcacugccucuuAccuggcu.....                                                                                    | 3    | 1 | S01 |
| .....ugcacugccucuuuccCggcu.....                                                                                    | 3    | 1 | S01 |
| .....ugcacugccucuuuccugUcu.....                                                                                    | 5    | 1 | S01 |
| .....ugcacugccAcuuucccuggcu.....                                                                                   | 2    | 1 | S01 |
| .....ugcacugccucuuucccuggcuG.....                                                                                  | 2    | 1 | S01 |
| .....ugcacugccucuuucccuggcAc.....                                                                                  | 1    | 1 | S01 |
| .....ugcacugccucuuucccugggcuc.....                                                                                 | 54   | 0 | S01 |
| .....ugcacugccucuuucccuggcuA.....                                                                                  | 7    | 1 | S01 |
| .....ugcacugccucuuucccuggcuU.....                                                                                  | 46   | 1 | S01 |
| .....ugcacugccuAuucccugggcuc.....                                                                                  | 1    | 1 | S01 |
| .....ugcacugccucuuucccuggcuAu.....                                                                                 | 1    | 1 | S01 |
| .....ugcacugccucuuucccugggcuC.....                                                                                 | 2    | 1 | S01 |
| .....ugcacugccucuuucccuggcuGu.....                                                                                 | 1    | 1 | S01 |
| .....ugcacugccucuuucccuggcuUu.....                                                                                 | 8    | 1 | S01 |
| .....ugcacugccucuuucccugggcucugac.....                                                                             | 1    | 0 | S01 |
| .....gcacugccucuuucccugggc.....                                                                                    | 1    | 0 | S01 |
| .....gcacugccucuuucccuggU.....                                                                                     | 1    | 1 | S01 |
| .....cacugccucuuucccugggc.....                                                                                     | 4    | 0 | S01 |
| .....cacugccucuuucccuggU.....                                                                                      | 1    | 1 | S01 |
| .....ccugggcucugacuccuuucu.....                                                                                    | 1    | 0 | S01 |
| ...caaagacgggggaacagacagaga.....                                                                                   | 1    | 0 | S02 |
| ....aagacgggggaacagacagag.....                                                                                     | 1    | 0 | S02 |
| ....aagacgggggaacagacagagU.....                                                                                    | 1    | 1 | S02 |
| ....aagacgggggaacagacagagc.....                                                                                    | 5    | 0 | S02 |
| ....aagacgggggaacagacagagca.....                                                                                   | 1    | 0 | S02 |
| ....aagacgggggaAagacagagca.....                                                                                    | 1    | 1 | S02 |
| ....aagacgggggaacagacagagcauA.....                                                                                 | 1    | 1 | S02 |
| ....aagacgggggaacagacGgagcaug.....                                                                                 | 1    | 1 | S02 |
| ....aagacgggggaacagacagagcaug.....                                                                                 | 48   | 0 | S02 |
| ....aagacgggggaacagacagagcaCg.....                                                                                 | 3    | 1 | S02 |

## Star

## Mature

|           |                          |                                         |                      |                   |     |  |  |
|-----------|--------------------------|-----------------------------------------|----------------------|-------------------|-----|--|--|
| agacaaaga | cggggaacagacagagcaugg    | augcagcuauuaacagucuuuuacuguuuugguuccacc | caugcacugccuucccuggc | cugacuccuuucuccuc |     |  |  |
| .....U    | agacggggaacagacagagcaug  | .....                                   | 1                    | 1                 | S02 |  |  |
| .....a    | agacggggaacagacagagcaugC | .....                                   | 1                    | 1                 | S02 |  |  |
| .....a    | gacggggaacagacagagcaugg  | .....                                   | 1                    | 0                 | S02 |  |  |
| .....g    | acggggaacagacagagcau     | .....                                   | 2                    | 0                 | S02 |  |  |
| .....g    | acggggaacagacagagcaug    | .....                                   | 10                   | 0                 | S02 |  |  |
| .....g    | acggggaacagacagagcaCg    | .....                                   | 1                    | 1                 | S02 |  |  |
| .....g    | acggggaacagacagagcauA    | .....                                   | 2                    | 1                 | S02 |  |  |
| .....C    | acggggaacagacagagcaug    | .....                                   | 1                    | 1                 | S02 |  |  |
| .....g    | acggggaacagacagagcaugU   | .....                                   | 2                    | 1                 | S02 |  |  |
| .....a    | cggggaacagacagagc        | .....                                   | 5                    | 0                 | S02 |  |  |
| .....a    | cggggaacagacagagU        | .....                                   | 1                    | 1                 | S02 |  |  |
| .....a    | cggggaacagacagagA        | .....                                   | 1                    | 1                 | S02 |  |  |
| .....a    | cggggaacUgacagagca       | .....                                   | 1                    | 1                 | S02 |  |  |
| .....a    | cggggaacagacagagca       | .....                                   | 7                    | 0                 | S02 |  |  |
| .....a    | cggggaacagacagagcau      | .....                                   | 8                    | 0                 | S02 |  |  |
| .....a    | cggggaacagacagagcaC      | .....                                   | 1                    | 1                 | S02 |  |  |
| .....a    | cggggaacagacCgagcaug     | .....                                   | 1                    | 1                 | S02 |  |  |
| .....a    | cggggaacagacagCgcaug     | .....                                   | 1                    | 1                 | S02 |  |  |
| .....a    | cggggaagagacagagcaug     | .....                                   | 1                    | 1                 | S02 |  |  |
| .....a    | cggggaalagacagagcaug     | .....                                   | 1                    | 1                 | S02 |  |  |
| .....a    | cggggaacagacagagcaug     | .....                                   | 341                  | 0                 | S02 |  |  |
| .....a    | cggggaacagacagagcCug     | .....                                   | 1                    | 1                 | S02 |  |  |
| .....a    | cggggaacagacagagcaug     | .....                                   | 1                    | 1                 | S02 |  |  |
| .....a    | cggggGacagacagagcaug     | .....                                   | 2                    | 1                 | S02 |  |  |
| .....a    | cggggaacagacagagcaug     | .....                                   | 1                    | 1                 | S02 |  |  |
| .....a    | cggggaacagacCgagcaug     | .....                                   | 2                    | 1                 | S02 |  |  |
| .....a    | cggggaCcagacagagcaug     | .....                                   | 1                    | 1                 | S02 |  |  |
| .....a    | cggggaacagacagagcaCg     | .....                                   | 24                   | 1                 | S02 |  |  |
| .....G    | cggggaacagacagagcaug     | .....                                   | 1                    | 1                 | S02 |  |  |
| .....a    | cggggaGcagacagagcaug     | .....                                   | 1                    | 1                 | S02 |  |  |
| .....a    | cggggaacCgacagagcaug     | .....                                   | 1                    | 1                 | S02 |  |  |
| .....a    | cggggaacagGcagagcaug     | .....                                   | 3                    | 1                 | S02 |  |  |
| .....a    | cguGgaacagacagagcaug     | .....                                   | 1                    | 1                 | S02 |  |  |
| .....a    | aggggaacagacagagcaug     | .....                                   | 1                    | 1                 | S02 |  |  |
| .....a    | cgggaacagacagagcaug      | .....                                   | 1                    | 1                 | S02 |  |  |
| .....a    | cggggaacagacagaaAug      | .....                                   | 2                    | 1                 | S02 |  |  |
| .....a    | cgaGgaacagacagagcaug     | .....                                   | 1                    | 1                 | S02 |  |  |
| .....a    | cggggaacagacagagcauA     | .....                                   | 9                    | 1                 | S02 |  |  |
| .....a    | cggggaacagacagagcauU     | .....                                   | 1                    | 1                 | S02 |  |  |
| .....a    | cggggaacagacagagcaGg     | .....                                   | 3                    | 1                 | S02 |  |  |
| .....a    | cgggCaacagacagagcaug     | .....                                   | 2                    | 1                 | S02 |  |  |
| .....a    | cggggaacGgacagagcaug     | .....                                   | 3                    | 1                 | S02 |  |  |
| .....a    | cggggaacagacagagcaugU    | .....                                   | 1                    | 1                 | S02 |  |  |
| .....a    | cggggaacagacagagcaugg    | .....                                   | 3                    | 0                 | S02 |  |  |
| .....a    | cggggaacagacagagcaugA    | .....                                   | 1                    | 1                 | S02 |  |  |
| .....a    | cggggaacagacagagcaugC    | .....                                   | 1                    | 1                 | S02 |  |  |
| .....a    | cggggaacagacagagcauggauA | .....                                   | 1                    | 1                 | S02 |  |  |
| .....a    | cggggaacagacagagcauggauU | .....                                   | 1                    | 1                 | S02 |  |  |
| .....c    | ggggaacagacagagca        | .....                                   | 3                    | 0                 | S02 |  |  |
| .....c    | ggggaacagacagagcU        | .....                                   | 2                    | 1                 | S02 |  |  |
| .....c    | ggUgaacagacagagcau       | .....                                   | 1                    | 1                 | S02 |  |  |
| .....c    | ggggGacagacagagcau       | .....                                   | 1                    | 1                 | S02 |  |  |
| .....c    | ggggaacagacagagcaA       | .....                                   | 1                    | 1                 | S02 |  |  |
| .....c    | ggggaacagacagagcaC       | .....                                   | 2                    | 1                 | S02 |  |  |
| .....c    | ggggaacagaAagagcau       | .....                                   | 1                    | 1                 | S02 |  |  |
| .....c    | ggggaacagacagagcau       | .....                                   | 47                   | 0                 | S02 |  |  |
| .....c    | ggggaacagacagagcaGg      | .....                                   | 1                    | 1                 | S02 |  |  |
| .....c    | Ugggaacagacagagcaug      | .....                                   | 1                    | 1                 | S02 |  |  |
| .....c    | ggggaacagacagagcauA      | .....                                   | 5                    | 1                 | S02 |  |  |
| .....c    | ggggaacagacagagcaug      | .....                                   | 29                   | 0                 | S02 |  |  |
| .....c    | ggggaacagacagagcaCg      | .....                                   | 2                    | 1                 | S02 |  |  |
| .....c    | ggUgaacagacagagcaug      | .....                                   | 1                    | 1                 | S02 |  |  |
| .....c    | ggggaacagacCgagcaug      | .....                                   | 1                    | 1                 | S02 |  |  |
| .....c    | gggggaalagacagagcaugg    | .....                                   | 3                    | 1                 | S02 |  |  |
| .....G    | ggggaacagacagagcaugg     | .....                                   | 2                    | 1                 | S02 |  |  |
| .....c    | ggggaacagacagagcaugA     | .....                                   | 48                   | 1                 | S02 |  |  |
| .....c    | Cgggaacagacagagcaugg     | .....                                   | 1                    | 1                 | S02 |  |  |
| .....c    | ggggaacagacagGgcaugg     | .....                                   | 2                    | 1                 | S02 |  |  |
| .....c    | ggggaacagacagagcGugg     | .....                                   | 3                    | 1                 | S02 |  |  |
| .....c    | ggggaacagacaAagcaugg     | .....                                   | 1                    | 1                 | S02 |  |  |

## Star

## Mature

|                                                                                                                   |     |   |     |
|-------------------------------------------------------------------------------------------------------------------|-----|---|-----|
| agacaaaagacgggggaacagacagagcauggaugcagcuauuaacagucuuuuacuguuuugguuccacccaugcacugccucuucccuggcucugacuccuuucucuccuc |     |   |     |
| .....cgggggaacagaUagagcaugg.....                                                                                  | 2   | 1 | S02 |
| .....cggggUacagacagagcaugg.....                                                                                   | 1   | 1 | S02 |
| .....cgggggaacagacagagcaGgg.....                                                                                  | 1   | 1 | S02 |
| .....cgggggaacagaGagagcaugg.....                                                                                  | 1   | 1 | S02 |
| .....cggggAaacagacagagcaugg.....                                                                                  | 1   | 1 | S02 |
| .....cgggggaacagacagagcaugU.....                                                                                  | 7   | 1 | S02 |
| .....cgggggaacagacagagcaugC.....                                                                                  | 3   | 1 | S02 |
| .....cgggggaacagacGgagcaugg.....                                                                                  | 1   | 1 | S02 |
| .....cgggggaacagacagCgcaugg.....                                                                                  | 2   | 1 | S02 |
| .....cgggggaacagGcagagcaugg.....                                                                                  | 2   | 1 | S02 |
| .....cgggggaGcagacagagcaugg.....                                                                                  | 2   | 1 | S02 |
| .....cggggGacagacagagcaugg.....                                                                                   | 2   | 1 | S02 |
| .....cgggggaacCgacagagcaugg.....                                                                                  | 1   | 1 | S02 |
| .....cAggggaacagacagagcaugg.....                                                                                  | 2   | 1 | S02 |
| .....cggAgaacagacagagcaugg.....                                                                                   | 1   | 1 | S02 |
| .....cgggggaacagacagagcaCgg.....                                                                                  | 1   | 1 | S02 |
| .....cgggggaacagacagagcauCg.....                                                                                  | 5   | 1 | S02 |
| .....cggUgaacagacagagcaugg.....                                                                                   | 8   | 1 | S02 |
| .....cgggggaacagacagagcaUg.....                                                                                   | 1   | 1 | S02 |
| .....cgggggaacagacagagGaugg.....                                                                                  | 1   | 1 | S02 |
| .....cgggggaCcagacagagcaugg.....                                                                                  | 1   | 1 | S02 |
| .....cgggggaacagacagagcaugg.....                                                                                  | 761 | 0 | S02 |
| .....cgggggaUagacagagcaugg.....                                                                                   | 4   | 1 | S02 |
| .....cgggggaacagacaCagcaugg.....                                                                                  | 1   | 1 | S02 |
| .....Ugggggaacagacagagcaugg.....                                                                                  | 2   | 1 | S02 |
| .....cgggggaacagacagaAcaugg.....                                                                                  | 1   | 1 | S02 |
| .....cgggggaacagacagagAaugg.....                                                                                  | 1   | 1 | S02 |
| .....cgggggaacGgacagagcaugg.....                                                                                  | 4   | 1 | S02 |
| .....cgggggaacagacagagcaAgg.....                                                                                  | 2   | 1 | S02 |
| .....cggggGacagacagagcaugg.....                                                                                   | 1   | 1 | S02 |
| .....cgggggaacagacagagcauggC.....                                                                                 | 1   | 1 | S02 |
| .....cgggggaacagacagagcaugga.....                                                                                 | 5   | 0 | S02 |
| .....cgggggaacagacagagcauggU.....                                                                                 | 1   | 1 | S02 |
| .....cgggggaacagGcagagcaugga.....                                                                                 | 1   | 1 | S02 |
| .....cgggaacagacagagcaugg.....                                                                                    | 1   | 1 | S02 |
| .....ggggaacagacagagcaugg.....                                                                                    | 1   | 0 | S02 |
| .....gggaacagacagagcaug.....                                                                                      | 1   | 0 | S02 |
| .....uggaugcagcuauuaacU.....                                                                                      | 1   | 1 | S02 |
| .....caugcacugccucuucccuggc.....                                                                                  | 1   | 0 | S02 |
| .....augcacugccucuucccG.....                                                                                      | 1   | 1 | S02 |
| .....augcacugccucuucccu.....                                                                                      | 9   | 0 | S02 |
| .....augcacugccucuucccC.....                                                                                      | 1   | 1 | S02 |
| .....augcacugccucuucccug.....                                                                                     | 1   | 0 | S02 |
| .....augcacugccucuucccuU.....                                                                                     | 1   | 1 | S02 |
| .....augcacugccucuucccugg.....                                                                                    | 7   | 0 | S02 |
| .....augcacuUccucuucccuggc.....                                                                                   | 4   | 1 | S02 |
| .....augcacugccucuuUcuggc.....                                                                                    | 5   | 1 | S02 |
| .....augcacuUccucuucccuggc.....                                                                                   | 3   | 1 | S02 |
| .....augcacugccucuuccGuggc.....                                                                                   | 1   | 1 | S02 |
| .....augAacugccucuucccuggc.....                                                                                   | 3   | 1 | S02 |
| .....aAgcacugccucuucccuggc.....                                                                                   | 2   | 1 | S02 |
| .....augcacugccucuucccAggc.....                                                                                   | 1   | 1 | S02 |
| .....augcacugccuGuucccuggc.....                                                                                   | 1   | 1 | S02 |
| .....augcacugccAcuucccuggc.....                                                                                   | 1   | 1 | S02 |
| .....Uugcacugccucuucccuggc.....                                                                                   | 1   | 1 | S02 |
| .....augcacugccuCucccuggc.....                                                                                    | 5   | 1 | S02 |
| .....augcacugcGucuucccuggc.....                                                                                   | 4   | 1 | S02 |
| .....augcacugccucuuAcuggc.....                                                                                    | 2   | 1 | S02 |
| .....augcacugccucuucccGggc.....                                                                                   | 2   | 1 | S02 |
| .....augcacugccucuucccugAc.....                                                                                   | 4   | 1 | S02 |
| .....augcacugccucuuUccuggc.....                                                                                   | 3   | 1 | S02 |
| .....aGcacugccucuucccuggc.....                                                                                    | 9   | 1 | S02 |
| .....aGcacugccucuucccuggc.....                                                                                    | 1   | 1 | S02 |
| .....augcacugcAucuucccuggc.....                                                                                   | 4   | 1 | S02 |
| .....augcacugccucuCcccuggc.....                                                                                   | 9   | 1 | S02 |
| .....augcacugccucuuGcuggc.....                                                                                    | 4   | 1 | S02 |
| .....augcaGugccucuucccuggc.....                                                                                   | 2   | 1 | S02 |
| .....augcacugccucuucccuggU.....                                                                                   | 271 | 1 | S02 |
| .....augcacugccucuucccAuggc.....                                                                                  | 1   | 1 | S02 |
| .....augGacugccucuucccuggc.....                                                                                   | 6   | 1 | S02 |

## Star

## Mature

agacaaaagacggggaacagacagagcauggaugcagcuauuaacagucuuuuacuguuuugguuccacccaugcacugccucuucccuggcucugacucuuucucuccuc

|                                  |      |   |     |
|----------------------------------|------|---|-----|
| .....augcacuAccucuucccuggc.....  | 12   | 1 | S02 |
| .....augUacugccucuucccuggc.....  | 3    | 1 | S02 |
| .....Gugcacugccucuucccuggc.....  | 6    | 1 | S02 |
| .....augcacugAcucuucccuggc.....  | 3    | 1 | S02 |
| .....auAacugccucuucccuggc.....   | 7    | 1 | S02 |
| .....augcUcugccucuucccuggc.....  | 2    | 1 | S02 |
| .....augcacugccucuucccuggc.....  | 1975 | 0 | S02 |
| .....auCcacugccucuucccuggc.....  | 1    | 1 | S02 |
| .....augcacugccucuucccugG.....   | 12   | 1 | S02 |
| .....augcGcugccucuucccuggc.....  | 10   | 1 | S02 |
| .....augcacugccucuucccCggc.....  | 10   | 1 | S02 |
| .....augcacugccucAuccuggc.....   | 3    | 1 | S02 |
| .....augcacugccucuucccuUgc.....  | 4    | 1 | S02 |
| .....augcacugccucGuccuggc.....   | 3    | 1 | S02 |
| .....augcacugccucuuGccuggc.....  | 1    | 1 | S02 |
| .....augcacugccucuucccuggA.....  | 60   | 1 | S02 |
| .....augcacugccCuucccuggc.....   | 10   | 1 | S02 |
| .....augcacugccucuuAccuggc.....  | 2    | 1 | S02 |
| .....Nugcacugccucuucccuggc.....  | 4    | 1 | S02 |
| .....augcacugccuAuuccuggc.....   | 1    | 1 | S02 |
| .....augcaUugccucuucccuggc.....  | 2    | 1 | S02 |
| .....augcacugccucuuAccuggc.....  | 2    | 1 | S02 |
| .....augcacugccucuucccugCc.....  | 1    | 1 | S02 |
| .....Cugcacugccucuucccuggc.....  | 1    | 1 | S02 |
| .....auUcacugccucuucccuggc.....  | 1    | 1 | S02 |
| .....augcacugccucuucccuAgc.....  | 9    | 1 | S02 |
| .....augcacugccucuucccUuggc..... | 1    | 1 | S02 |
| .....augcacugUcucuucccuggc.....  | 3    | 1 | S02 |
| .....augcCcugccucuucccuggc.....  | 4    | 1 | S02 |
| .....augcacCgcccucuucccuggc..... | 4    | 1 | S02 |
| .....augcaAugccucuucccuggc.....  | 3    | 1 | S02 |
| .....augcacugGcucuucccuggc.....  | 2    | 1 | S02 |
| .....augcacugccucuucccuggcC..... | 1    | 1 | S02 |
| .....augcacugccucuucccuggcG..... | 1    | 1 | S02 |
| .....Cgcacugccucuucccug.....     | 1    | 1 | S02 |
| .....ugcacugccucuucccuA.....     | 2    | 1 | S02 |
| .....ugcacugccucuucccug.....     | 30   | 0 | S02 |
| .....ugcacugccucuucccuU.....     | 4    | 1 | S02 |
| .....ugcacugccucuucccCg.....     | 2    | 1 | S02 |
| .....ugcacugccucuucccugC.....    | 1    | 1 | S02 |
| .....ugcacugccucuucccugU.....    | 5    | 1 | S02 |
| .....ugcacugccucuucccugg.....    | 18   | 0 | S02 |
| .....uAacacugccucuucccugg.....   | 1    | 1 | S02 |
| .....ugcacugccucuucccugA.....    | 1    | 1 | S02 |
| .....ugcacugccucuucccuUg.....    | 1    | 1 | S02 |
| .....Agcacugccucuucccuggc.....   | 1    | 1 | S02 |
| .....ugcacugccucuuUcuggc.....    | 3    | 1 | S02 |
| .....ugcacugccucuucccuggA.....   | 39   | 1 | S02 |
| .....ugcacugccucuuAccuggc.....   | 1    | 1 | S02 |
| .....ugcacugccucuuAccuggc.....   | 2    | 1 | S02 |
| .....ugcacugccucuucccuggc.....   | 1136 | 0 | S02 |
| .....uUcacugccucuucccuggc.....   | 1    | 1 | S02 |
| .....ugcacugccucuuGccuggc.....   | 1    | 1 | S02 |
| .....ugcacuAccucuucccuggc.....   | 3    | 1 | S02 |
| .....ugcacAgccucuucccuggc.....   | 2    | 1 | S02 |
| .....ugcacugccucuucccCggc.....   | 6    | 1 | S02 |
| .....ugcacugccucuucccuUgc.....   | 2    | 1 | S02 |
| .....ugcacugAcucuucccuggc.....   | 1    | 1 | S02 |
| .....ugcacCgcccucuucccuggc.....  | 1    | 1 | S02 |
| .....ugcacugccucuucccuggU.....   | 180  | 1 | S02 |
| .....ugcacuCcucuucccuggc.....    | 2    | 1 | S02 |
| .....ugcacugccucuucccuggG.....   | 7    | 1 | S02 |
| .....ugcacugccucAuccuggc.....    | 1    | 1 | S02 |
| .....ugcacugccucuuccAuggc.....   | 3    | 1 | S02 |
| .....ugcacugccucuucccuAgc.....   | 3    | 1 | S02 |
| .....ugcacugccGuucccuggc.....    | 1    | 1 | S02 |
| .....ugcacugccuAuuccuggc.....    | 2    | 1 | S02 |
| .....ugcacugccucCuccuggc.....    | 5    | 1 | S02 |
| .....ugcacGgcccucuucccuggc.....  | 1    | 1 | S02 |
| .....ugcacugccucuuGcuggc.....    | 2    | 1 | S02 |

## Star

## Mature

|                                                                                                                   |     |   |     |
|-------------------------------------------------------------------------------------------------------------------|-----|---|-----|
| agacaaaagacggggaacagacagagcauggaugcagcuauuaacagucuuuuacuguuuugguuccaccccaugcacugccucuuucccuggcucugacucuuucucuccuc |     |   |     |
| .....ugcacugccuUuucccuggc.....                                                                                    | 5   | 1 | S02 |
| .....ugUacugccucuucccuggc.....                                                                                    | 1   | 1 | S02 |
| .....ugcacugccuGuucccuggc.....                                                                                    | 1   | 1 | S02 |
| .....ugcacugccucuucccugAc.....                                                                                    | 4   | 1 | S02 |
| .....ugcacugUcucuucccuggc.....                                                                                    | 4   | 1 | S02 |
| .....ugcacugcGuucccuggc.....                                                                                      | 1   | 1 | S02 |
| .....ugcacuUccucuucccuggc.....                                                                                    | 5   | 1 | S02 |
| .....ugcacugccucuuAcuggc.....                                                                                     | 1   | 1 | S02 |
| .....ugcacugccucuCcccuggc.....                                                                                    | 6   | 1 | S02 |
| .....ugcacugccucuuUccuggc.....                                                                                    | 4   | 1 | S02 |
| .....ugcacugccucuucccugUc.....                                                                                    | 2   | 1 | S02 |
| .....uAcacugccucuucccuggc.....                                                                                    | 2   | 1 | S02 |
| .....ugcacugccAcucccuggc.....                                                                                     | 1   | 1 | S02 |
| .....ugcacugcUucuucccuggc.....                                                                                    | 2   | 1 | S02 |
| .....ugcacugccCuucccuggc.....                                                                                     | 3   | 1 | S02 |
| .....Cgcacugccucuucccuggc.....                                                                                    | 4   | 1 | S02 |
| .....ugcacugGcucuucccuggc.....                                                                                    | 1   | 1 | S02 |
| .....ugcUcugccucuucccuggc.....                                                                                    | 1   | 1 | S02 |
| .....ugcGcugccucuucccuggc.....                                                                                    | 10  | 1 | S02 |
| .....ugcacugccucuucccAggc.....                                                                                    | 3   | 1 | S02 |
| .....ugcacugccucuucccUuggc.....                                                                                   | 1   | 1 | S02 |
| .....Ggcacugccucuucccuggc.....                                                                                    | 2   | 1 | S02 |
| .....ugcacugccucuuGccuggc.....                                                                                    | 1   | 1 | S02 |
| .....Cgcacugccucuucccuggc.....                                                                                    | 3   | 1 | S02 |
| .....ugcacugccucuucccuggUu.....                                                                                   | 1   | 1 | S02 |
| .....ugcacugccucuucccuggcG.....                                                                                   | 61  | 1 | S02 |
| .....ugcacugccucuucccuggcA.....                                                                                   | 28  | 1 | S02 |
| .....uUcacugccucuucccuggcu.....                                                                                   | 1   | 1 | S02 |
| .....ugcacugccucuuAccuggc.....                                                                                    | 1   | 1 | S02 |
| .....ugcacAgccucuucccuggcu.....                                                                                   | 1   | 1 | S02 |
| .....ugcacuUccucuucccuggcu.....                                                                                   | 3   | 1 | S02 |
| .....ugcacugccuAcucccuggcu.....                                                                                   | 1   | 1 | S02 |
| .....Ggcacugccucuucccuggcu.....                                                                                   | 1   | 1 | S02 |
| .....ugcacugccuGuucccuggcu.....                                                                                   | 1   | 1 | S02 |
| .....ugcacugcUucuucccuggcu.....                                                                                   | 1   | 1 | S02 |
| .....ugcUcugccucuucccuggcu.....                                                                                   | 1   | 1 | S02 |
| .....ugcGcugccucuucccuggcu.....                                                                                   | 3   | 1 | S02 |
| .....ugcacugccucuucccugAcu.....                                                                                   | 1   | 1 | S02 |
| .....ugcacugccucuucccUgcu.....                                                                                    | 2   | 1 | S02 |
| .....Agcacugccucuucccuggcu.....                                                                                   | 2   | 1 | S02 |
| .....ugcacugccucuucccuggcC.....                                                                                   | 56  | 1 | S02 |
| .....ugcacugccucuucccugUcu.....                                                                                   | 1   | 1 | S02 |
| .....ugcacugAcucuucccuggcu.....                                                                                   | 1   | 1 | S02 |
| .....ugcacugccucuucccuggcu.....                                                                                   | 444 | 0 | S02 |
| .....ugcacGccucuucccuggcu.....                                                                                    | 1   | 1 | S02 |
| .....ugcacugccucuucccGggcu.....                                                                                   | 1   | 1 | S02 |
| .....ugcacugcAucuucccuggcu.....                                                                                   | 2   | 1 | S02 |
| .....ugcacugccCuucccuggcu.....                                                                                    | 3   | 1 | S02 |
| .....ugcacugccGcuucccuggcu.....                                                                                   | 1   | 1 | S02 |
| .....ugcacuAccucuucccuggcu.....                                                                                   | 3   | 1 | S02 |
| .....ugcacugccucuucccAuggc.....                                                                                   | 1   | 1 | S02 |
| .....ugcacugccucuuGccuggc.....                                                                                    | 2   | 1 | S02 |
| .....ugcacugccucuuUccuggc.....                                                                                    | 1   | 1 | S02 |
| .....ugGacugccucuucccuggcu.....                                                                                   | 1   | 1 | S02 |
| .....uCcacugccucuucccuggcu.....                                                                                   | 1   | 1 | S02 |
| .....ugcacuCcucuucccuggcu.....                                                                                    | 2   | 1 | S02 |
| .....ugcacugccucuucccuggcuG.....                                                                                  | 1   | 1 | S02 |
| .....ugcacuCcucuucccuggcuc.....                                                                                   | 1   | 1 | S02 |
| .....ugcacugccucuucccuggcuA.....                                                                                  | 3   | 1 | S02 |
| .....ugcacugccucuucccuggcuc.....                                                                                  | 15  | 0 | S02 |
| .....ugcacugccucuucccuggcuU.....                                                                                  | 14  | 1 | S02 |
| .....ugcacugccucuucccuggcucG.....                                                                                 | 1   | 1 | S02 |
| .....ugcacugccucuucccuggcucug.....                                                                                | 1   | 0 | S02 |
| .....ccuggcucugacuccuuucucu.....                                                                                  | 2   | 0 | S02 |

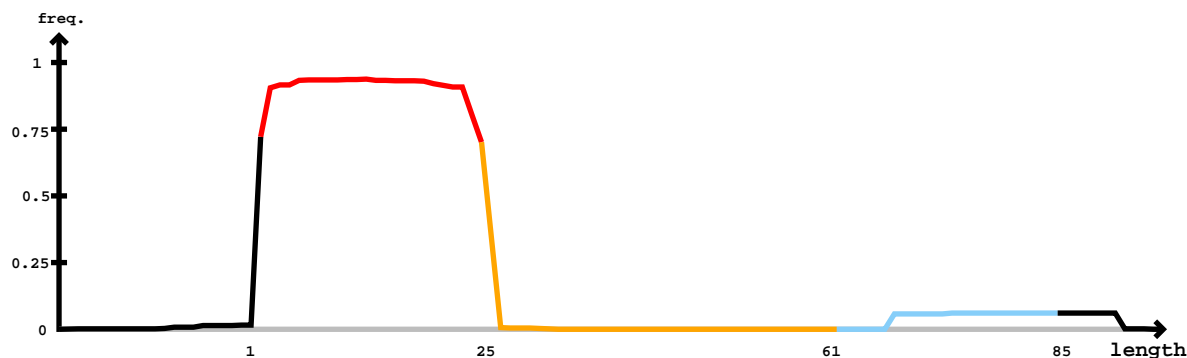

Star

| 5'-                                                                                         |                                    | -3' | exp    |
|---------------------------------------------------------------------------------------------|------------------------------------|-----|--------|
| cauugcugggguugugucccagcuacugcggaauagacuugggcugccacauaugugccacguaacaauuuucugcca              | caugccuaauccucauuggcugggugcaccacuc |     |        |
| .....((((((( (((((((((((( (((((((((( (((((((((( .....)))))))).) ))))))) .) ))))))).))) .))) | reads                              | mm  | sample |
| cauugcugggguuguguccU.....                                                                   | 1                                  | 1   | S01    |
| .....uuguguccccagcuacugcgg.....                                                             | 1                                  | 0   | S01    |
| .....uuguguccUagcuacugcgg.....                                                              | 1                                  | 1   | S01    |
| .....ugcuccUagcuacugcggaauaag.....                                                          | 1                                  | 1   | S01    |
| .....ugcuccUagcuacugcggaauaaga.....                                                         | 2                                  | 1   | S01    |
| .....ugcucccagcuacugcggaauaagac.....                                                        | 1                                  | 0   | S01    |
| .....Uagcuacugcggaauaaga.....                                                               | 3                                  | 1   | S01    |
| .....cagcuacugcggaauaaga.....                                                               | 1                                  | 0   | S01    |
| .....cagcuacugcggaauaagacu.....                                                             | 1                                  | 0   | S01    |
| .....cagcuacugcggaauaagacuug.....                                                           | 12                                 | 0   | S01    |
| .....cagcuacugcggaCaagacuug.....                                                            | 1                                  | 1   | S01    |
| .....cagcuacugcggaauaagacuuU.....                                                           | 1                                  | 1   | S01    |
| .....cagcuacugcggaauaagacuugC.....                                                          | 5                                  | 1   | S01    |
| .....cagcuacugcggaGaagacuugu.....                                                           | 1                                  | 1   | S01    |
| .....cagcuacugcggaauaagacuugu.....                                                          | 11                                 | 0   | S01    |
| .....cagcuacugcggaauaagacCugug.....                                                         | 1                                  | 1   | S01    |
| .....cagcuacugcggaauaagaGuugug.....                                                         | 1                                  | 1   | S01    |
| .....cagcuacugcggaauaagacuuguA.....                                                         | 7                                  | 1   | S01    |
| .....cagcuacugcUgauaagacuugug.....                                                          | 1                                  | 1   | S01    |
| .....cagcuacugcggaauaUacuugug.....                                                          | 1                                  | 1   | S01    |
| .....cagcuacugcggaauaagacAugug.....                                                         | 2                                  | 1   | S01    |
| .....cagcuacugcggaauaagacuugug.....                                                         | 87                                 | 0   | S01    |
| .....cagcuacugcggaauaagacuugCg.....                                                         | 1                                  | 1   | S01    |
| .....cagcuacugcggaauaagacuuguC.....                                                         | 1                                  | 1   | S01    |
| .....cagcuacugAggaauaagacuugug.....                                                         | 1                                  | 1   | S01    |
| .....cagcuGcugcggaauaagacuugug.....                                                         | 2                                  | 1   | S01    |
| .....cagcuacugcggaauaagacuCgug.....                                                         | 1                                  | 1   | S01    |
| .....cagcuacugcggaCaagacuugug.....                                                          | 1                                  | 1   | S01    |
| .....cagcuacAgcggaauaagacuugug.....                                                         | 2                                  | 1   | S01    |
| .....cGgcuaucugcggaauaagacuugug.....                                                        | 1                                  | 1   | S01    |
| .....cagcuacugcggaauaagacCugug.....                                                         | 1                                  | 1   | S01    |
| .....Uagcuacugcggaauaagacuugug.....                                                         | 1                                  | 1   | S01    |
| .....cagcuacugcggaauaagacuUug.....                                                          | 1                                  | 1   | S01    |
| .....cagcuacugcggaGaagacuugug.....                                                          | 1                                  | 1   | S01    |

## Mature

## Star

|                                   |                                                             |                                   |     |   |     |
|-----------------------------------|-------------------------------------------------------------|-----------------------------------|-----|---|-----|
| cauugcuggguugugcucc               | cagcuacugcggauaagacuugugcugccacauaugugccacguaacauuuuccugcca | cagccuuauucccauuggcugggugcaccacuc |     |   |     |
| .....agcuacugcggauaagacAug.       |                                                             |                                   | 5   | 1 | S01 |
| .....agcuacugcggauaagacuAg.       |                                                             |                                   | 1   | 1 | S01 |
| .....agcuacugcggauaagacuug.       |                                                             |                                   | 2   | 0 | S01 |
| .....agcuauugcggauaagacuugu.      |                                                             |                                   | 1   | 1 | S01 |
| .....agcuacugcggauaagacuugu.      |                                                             |                                   | 3   | 0 | S01 |
| .....agcuacugcggauaagacAugu.      |                                                             |                                   | 3   | 1 | S01 |
| .....agcuacugcggauaagacuugug.     |                                                             |                                   | 1   | 0 | S01 |
| .....agcuacugcggauaagacAugug.     |                                                             |                                   | 13  | 1 | S01 |
| .....agcuacugcggauaagacGugugg.    |                                                             |                                   | 1   | 1 | S01 |
| .....agcuacugcggauaagacuugugA.    |                                                             |                                   | 3   | 1 | S01 |
| .....agcuacugcggauaagacuugugg.    |                                                             |                                   | 15  | 0 | S01 |
| .....agcuacugcggauaagacAugugg.    |                                                             |                                   | 2   | 1 | S01 |
| .....gcuacugcggauaagacuugu.       |                                                             |                                   | 1   | 0 | S01 |
| .....gcuacugcggauaagacAugu.       |                                                             |                                   | 1   | 1 | S01 |
| .....gcuacugcggauaagacAugug.      |                                                             |                                   | 1   | 1 | S01 |
| .....gcuacugcggauaagacuugggc.     |                                                             |                                   | 1   | 0 | S01 |
| .....uacugcggauaagacAug.          |                                                             |                                   | 1   | 1 | S01 |
| .....uacugcggauaagacuuguU.        |                                                             |                                   | 1   | 1 | S01 |
| .....uacugcggauaagacAugug.        |                                                             |                                   | 2   | 1 | S01 |
| .....gauaagacuuguggcugcca.        |                                                             |                                   | 1   | 0 | S01 |
| .....uuauucccauuggcugggugcacA...  |                                                             |                                   | 1   | 1 | S01 |
| .....uuauucccauuggcugggugcacU...  |                                                             |                                   | 3   | 1 | S01 |
| .....uuauuccAcauuggcugggugcacc... |                                                             |                                   | 1   | 1 | S01 |
| .....uuauucccauuggcugggugcacc...  |                                                             |                                   | 21  | 0 | S01 |
| .....ucauuggcugggugcacc...        |                                                             |                                   | 1   | 0 | S01 |
| .....guugugcucccagcuacugUggau.    |                                                             |                                   | 1   | 1 | S02 |
| .....uugugcuccUagcuacugcgg.       |                                                             |                                   | 1   | 1 | S02 |
| .....cccagcuacugcggauaagacuug.    |                                                             |                                   | 1   | 0 | S02 |
| .....Uagcuacugcggauaagac.         |                                                             |                                   | 3   | 1 | S02 |
| .....cagcuacugcggauaagacu.        |                                                             |                                   | 3   | 0 | S02 |
| .....cagcuacugcggauaagacuU.       |                                                             |                                   | 1   | 1 | S02 |
| .....cagcuacugcggauaagacuA.       |                                                             |                                   | 1   | 1 | S02 |
| .....cagcuacugcggauaagacuug.      |                                                             |                                   | 7   | 0 | S02 |
| .....cagcuacugcggauaAaacuugu.     |                                                             |                                   | 1   | 1 | S02 |
| .....cagcuacugcggauaagacuugu.     |                                                             |                                   | 27  | 0 | S02 |
| .....cagcuacugcggauaagacuugA.     |                                                             |                                   | 2   | 1 | S02 |
| .....cagcuacugcggauaagacuAa.      |                                                             |                                   | 1   | 1 | S02 |
| .....cagcuacugcggauaagacuCgu.     |                                                             |                                   | 1   | 1 | S02 |
| .....cagcuacugUggauaagacuugu.     |                                                             |                                   | 1   | 1 | S02 |
| .....cagUuacugcggauaagacuugug.    |                                                             |                                   | 1   | 1 | S02 |
| .....cagcuacugcggauaagacuugug.    |                                                             |                                   | 201 | 0 | S02 |
| .....cagcuacugcggauaagacuuguU.    |                                                             |                                   | 6   | 1 | S02 |
| .....cagcuacugUggauaagacuugug.    |                                                             |                                   | 1   | 1 | S02 |
| .....cagcuacugcggauaagacuugug.    |                                                             |                                   | 2   | 1 | S02 |
| .....cagcuacugcggauaagacuuguA.    |                                                             |                                   | 17  | 1 | S02 |
| .....cagcuacugcggauaagaGuugug.    |                                                             |                                   | 1   | 1 | S02 |
| .....cagcuacugcggauaagacuCgug.    |                                                             |                                   | 1   | 1 | S02 |
| .....cagcuacugcggauaagacAugug.    |                                                             |                                   | 4   | 1 | S02 |
| .....cagcuacugcggauaagacuuguC.    |                                                             |                                   | 1   | 1 | S02 |
| .....cagcuacugcggauCagacuugug.    |                                                             |                                   | 1   | 1 | S02 |
| .....cagcuacugcCgauaagacuugug.    |                                                             |                                   | 1   | 1 | S02 |
| .....cagcuUcugcggauaagacuugug.    |                                                             |                                   | 1   | 1 | S02 |
| .....cagcuacugAggauaagacuugug.    |                                                             |                                   | 2   | 1 | S02 |
| .....cagcuacugcggauaagacuugCg.    |                                                             |                                   | 10  | 1 | S02 |
| .....cagcuacugGggauaagacuugug.    |                                                             |                                   | 1   | 1 | S02 |
| .....Uagcuacugcggauaagacuugug.    |                                                             |                                   | 3   | 1 | S02 |
| .....cagcuacugcggauaagGcuugug.    |                                                             |                                   | 1   | 1 | S02 |
| .....cagcuacugcggauaagaAuugug.    |                                                             |                                   | 1   | 1 | S02 |
| .....agcuacugcggauaagacuug.       |                                                             |                                   | 7   | 0 | S02 |
| .....agcuacugcggauaagacAug.       |                                                             |                                   | 24  | 1 | S02 |
| .....agcuacAgcggauaagacuug.       |                                                             |                                   | 1   | 1 | S02 |
| .....agcuacugcggauaagacuugu.      |                                                             |                                   | 4   | 0 | S02 |
| .....agcuacugcggauaagacAugu.      |                                                             |                                   | 2   | 1 | S02 |
| .....agcuacugcggauaagacuugug.     |                                                             |                                   | 5   | 0 | S02 |
| .....agcuacugcggauaagacAugug.     |                                                             |                                   | 9   | 1 | S02 |
| .....agcuacugcggauaagacAugugg.    |                                                             |                                   | 1   | 1 | S02 |
| .....agcuacugcggauaagacuugCgg.    |                                                             |                                   | 1   | 1 | S02 |
| .....agcuacugcggauaagacuugugg.    |                                                             |                                   | 15  | 0 | S02 |
| .....gcuacugcggCaagacuug.         |                                                             |                                   | 1   | 1 | S02 |

## Mature

## Star

|                                                                                                                                    |   |   |     |
|------------------------------------------------------------------------------------------------------------------------------------|---|---|-----|
| cauugcuggguugugcuccagc <u>uacugcggauaagacuuguggcugcc</u> cauauugugccacguaacauuuuccugcca <u>caugccuuauccucauugggcugggugcaccacuc</u> |   |   |     |
| .....gc <u>uacugcggauaagacuug</u> .....                                                                                            | 1 | 0 | S02 |
| .....gc <u>uacugcggauaagacuugu</u> .....                                                                                           | 1 | 0 | S02 |
| .....uacugcggauaagacuugu <u>U</u> .....                                                                                            | 1 | 1 | S02 |
| .....uacugcggauaagac <u>Augug</u> .....                                                                                            | 2 | 1 | S02 |
| .....uacugcggauaagacuugug.....                                                                                                     | 3 | 0 | S02 |
| .....uacugcggauaagacuugugg.....                                                                                                    | 1 | 0 | S02 |
| .....acugcggauaagacuugggcugc.....                                                                                                  | 1 | 0 | S02 |
| .....cggauaagac <u>Auguggcugcc</u> .....                                                                                           | 1 | 1 | S02 |
| .....uuauccucauugggcugggugcacc....                                                                                                 | 8 | 0 | S02 |
| .....uuauccucauugggcugggugcacA....                                                                                                 | 1 | 1 | S02 |
| .....uuauccucauugggcugggugcacU....                                                                                                 | 2 | 1 | S02 |
| .....ucauugggcugggugcaccacu.....                                                                                                   | 1 | 0 | S02 |



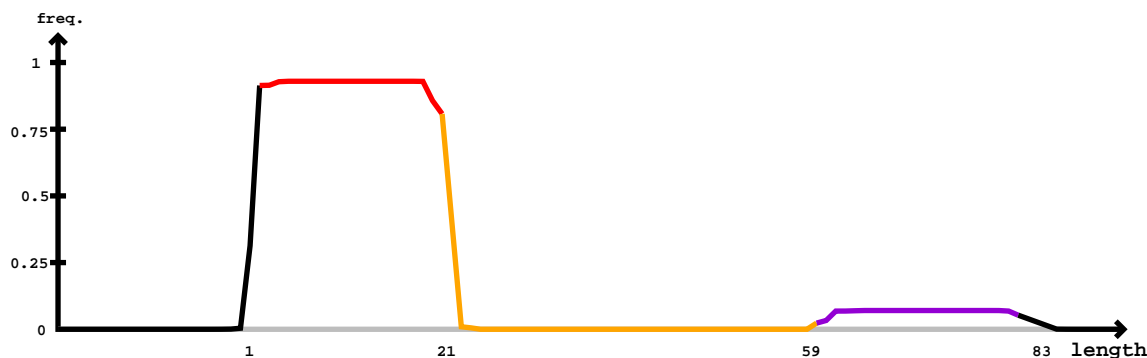

Star

| 5' | auucuuugcgacauagaauugacagaagagagugagcacacagaggccauuguauaagcuuaauacuuuugcuuuugcgugucacuuucucugucagcuuccagug   | -3'   | obs |        |
|----|--------------------------------------------------------------------------------------------------------------|-------|-----|--------|
|    | auucuuugcgacauagaauugacagaagagagugagcacacagaggccauuguauaagcuuaauacuuuugcuuuugcgugucacuuucucugucagcuuccagug   |       | exp |        |
|    | .....(((.(((.(((((((((((((((((((((((((((((((((((((((((((.)))))))).)))))))).)))))))).)))))))).)))))))).)))))) | reads | mm  | sample |
|    | .....aaauugacagaagagagugagU.....                                                                             | 1     | 1   | S01    |
|    | .....aaauugacagaagagagGgagc.....                                                                             | 1     | 1   | S01    |
|    | .....auugacagaagagGgugagc.....                                                                               | 1     | 1   | S01    |
|    | .....auugacagaagagagugagc.....                                                                               | 12    | 0   | S01    |
|    | .....auugacagaagagagugagU.....                                                                               | 2     | 1   | S01    |
|    | .....auugacagaagagagugagcU.....                                                                              | 1     | 1   | S01    |
|    | .....auugacagaagagagugagca.....                                                                              | 1     | 0   | S01    |
|    | .....Cuugacagaagagagugagcac.....                                                                             | 3     | 1   | S01    |
|    | .....auugacagaagagagugagcac.....                                                                             | 1     | 0   | S01    |
|    | .....uugacagaagagagugaU.....                                                                                 | 1     | 1   | S01    |
|    | .....uugacagaagagagugagU.....                                                                                | 6     | 1   | S01    |
|    | .....uugacagaagagagGgagc.....                                                                                | 1     | 1   | S01    |
|    | .....uugacagaagagCgugagc.....                                                                                | 1     | 1   | S01    |
|    | .....uugacagaagagGgugagc.....                                                                                | 1     | 1   | S01    |
|    | .....uugacagaagagagugagc.....                                                                                | 57    | 0   | S01    |
|    | .....uugacagaagagagugagA.....                                                                                | 1     | 1   | S01    |
|    | .....uugUcagaagagagugagc.....                                                                                | 1     | 1   | S01    |
|    | .....uugGcagaagagagugagc.....                                                                                | 1     | 1   | S01    |
|    | .....uugacCgaagagagugagc.....                                                                                | 1     | 1   | S01    |
|    | .....uugacagaagGgagugagca.....                                                                               | 1     | 1   | S01    |
|    | .....uugacagaagagagugagcG.....                                                                               | 1     | 1   | S01    |
|    | .....uugacagGagagagugagca.....                                                                               | 1     | 1   | S01    |
|    | .....uugacagaagagagugagca.....                                                                               | 48    | 0   | S01    |
|    | .....uugacagaagagagugagcU.....                                                                               | 1     | 1   | S01    |
|    | .....uugacagaGgagagugagcac.....                                                                              | 4     | 1   | S01    |
|    | .....uugacagaagagagugagcaA.....                                                                              | 12    | 1   | S01    |
|    | .....uugacagaagagagugagcaG.....                                                                              | 1     | 1   | S01    |
|    | .....uugacGgaagagagugagcac.....                                                                              | 2     | 1   | S01    |
|    | .....Nuugacagaagagagugagcac.....                                                                             | 1     | 1   | S01    |
|    | .....uugacagGagagagugagcac.....                                                                              | 5     | 1   | S01    |
|    | .....uugaGagaagagagugagcac.....                                                                              | 1     | 1   | S01    |
|    | .....uugacaUaagagagugagcac.....                                                                              | 1     | 1   | S01    |
|    | .....uugacagaagagagAugagcac.....                                                                             | 2     | 1   | S01    |

## Mature

## Star

|                                                                                                                                                    |      |   |     |
|----------------------------------------------------------------------------------------------------------------------------------------------------|------|---|-----|
| auucuugcgacauagaaa <u>ugacagagaagagagugagcacacagaggc</u> acuuguauaagcuuauacu <u>uuugc</u> uuuugc <u>gugcucacacuu</u> cuuuc <u>uguca</u> gcuuccagug |      |   |     |
| .....uugacagagaagagagu <u>AAgcac</u> .....                                                                                                         | 1    | 1 | S01 |
| .....uugacUgaagagagugagcac.....                                                                                                                    | 1    | 1 | S01 |
| .....uugacagagaagagagugUgcac.....                                                                                                                  | 2    | 1 | S01 |
| .....uugCcagaagagagugagcac.....                                                                                                                    | 2    | 1 | S01 |
| .....uugacagagaagagagGgagcac.....                                                                                                                  | 5    | 1 | S01 |
| .....uugacagagaagagagugagcGc.....                                                                                                                  | 2    | 1 | S01 |
| .....uugacagagaagGgagugagcac.....                                                                                                                  | 3    | 1 | S01 |
| .....uugacagagaagagagugagcaU.....                                                                                                                  | 83   | 1 | S01 |
| .....uugacagagaagagagugGgcac.....                                                                                                                  | 9    | 1 | S01 |
| .....uGgacagagaagagagugagcac.....                                                                                                                  | 2    | 1 | S01 |
| .....uugGcagaagagagugagcac.....                                                                                                                    | 5    | 1 | S01 |
| .....uugacagagaagagagugagAAC.....                                                                                                                  | 1    | 1 | S01 |
| .....Aagacagagaagagagugagcac.....                                                                                                                  | 4    | 1 | S01 |
| .....uugacagCagagagugagcac.....                                                                                                                    | 1    | 1 | S01 |
| .....uugUcagaagagagugagcac.....                                                                                                                    | 2    | 1 | S01 |
| .....uugacagagaagagagCgagcac.....                                                                                                                  | 6    | 1 | S01 |
| .....uugacagagaagagagugagUac.....                                                                                                                  | 1    | 1 | S01 |
| .....uugacacAAagagagugagcac.....                                                                                                                   | 1    | 1 | S01 |
| .....uugacagagaagaUagugagcac.....                                                                                                                  | 1    | 1 | S01 |
| .....uugacagagaagagagugagcac.....                                                                                                                  | 754  | 0 | S01 |
| .....uugacagagaagagagugagcacac.....                                                                                                                | 1    | 0 | S01 |
| .....uugacagagaagagagugagcacC.....                                                                                                                 | 10   | 1 | S01 |
| .....uugacagagaagagagugagcacG.....                                                                                                                 | 2    | 1 | S01 |
| .....uugacagagaagagagugagcacU.....                                                                                                                 | 13   | 1 | S01 |
| .....uugacagagaagagagugagcacacC.....                                                                                                               | 1    | 1 | S01 |
| .....ugacagagaagagagugagU.....                                                                                                                     | 21   | 1 | S01 |
| .....Ggacagagaagagagugagc.....                                                                                                                     | 1    | 1 | S01 |
| .....ugacagaaaAagagugagc.....                                                                                                                      | 2    | 1 | S01 |
| .....ugGcagaagagagugagc.....                                                                                                                       | 1    | 1 | S01 |
| .....uCaCagaagagagugagc.....                                                                                                                       | 1    | 1 | S01 |
| .....ugacagagaagagagugagA.....                                                                                                                     | 3    | 1 | S01 |
| .....ugacagagaagagGgugagc.....                                                                                                                     | 2    | 1 | S01 |
| .....ugacagagGgagagugagc.....                                                                                                                      | 1    | 1 | S01 |
| .....ugacagagaagagagugGgc.....                                                                                                                     | 1    | 1 | S01 |
| .....ugacGgaagagagugagc.....                                                                                                                       | 2    | 1 | S01 |
| .....ugacagagaagagagugagc.....                                                                                                                     | 152  | 0 | S01 |
| .....Agacagagaagagagugagc.....                                                                                                                     | 1    | 1 | S01 |
| .....ugUcagaagagagugagc.....                                                                                                                       | 1    | 1 | S01 |
| .....ugaGagaagagagugagc.....                                                                                                                       | 1    | 1 | S01 |
| .....ugacUgaagagagugagc.....                                                                                                                       | 1    | 1 | S01 |
| .....ugacagagaagagagCgagc.....                                                                                                                     | 3    | 1 | S01 |
| .....ugacagagaagagagCgagca.....                                                                                                                    | 1    | 1 | S01 |
| .....Ggacagagaagagagugagca.....                                                                                                                    | 2    | 1 | S01 |
| .....Cgacagagaagagagugagca.....                                                                                                                    | 2    | 1 | S01 |
| .....ugacagagaagagagugagcG.....                                                                                                                    | 6    | 1 | S01 |
| .....ugacagagaagCgagugagca.....                                                                                                                    | 1    | 1 | S01 |
| .....ugacagagaagagGgugagca.....                                                                                                                    | 1    | 1 | S01 |
| .....ugacagagaagagagugagcU.....                                                                                                                    | 5    | 1 | S01 |
| .....ugacagagaagagagugagca.....                                                                                                                    | 164  | 0 | S01 |
| .....ugacagagaagGgagugagca.....                                                                                                                    | 1    | 1 | S01 |
| .....ugacagagaagagagugGgca.....                                                                                                                    | 2    | 1 | S01 |
| .....ugaGagaagagagugagca.....                                                                                                                      | 1    | 1 | S01 |
| .....ugaUagaagagagugagcac.....                                                                                                                     | 2    | 1 | S01 |
| .....ugacagagaagagagugagcaU.....                                                                                                                   | 228  | 1 | S01 |
| .....ugacagagaagagaguAagcac.....                                                                                                                   | 1    | 1 | S01 |
| .....ugacagagaagagagugagcaG.....                                                                                                                   | 5    | 1 | S01 |
| .....ugacagagUgagagugagcac.....                                                                                                                    | 1    | 1 | S01 |
| .....Cgacagagaagagagugagcac.....                                                                                                                   | 9    | 1 | S01 |
| .....ugacagagaagagCgugagcac.....                                                                                                                   | 2    | 1 | S01 |
| .....ugacagagaagagagugagUac.....                                                                                                                   | 4    | 1 | S01 |
| .....ugacagagaagaUagugagcac.....                                                                                                                   | 3    | 1 | S01 |
| .....ugacagagCgagagugagcac.....                                                                                                                    | 1    | 1 | S01 |
| .....ugacagagaagagagugagcac.....                                                                                                                   | 1840 | 0 | S01 |
| .....Agacagagaagagagugagcac.....                                                                                                                   | 6    | 1 | S01 |
| .....ugacagagaagagagUugagcac.....                                                                                                                  | 3    | 1 | S01 |
| .....ugacagCagagagugagcac.....                                                                                                                     | 2    | 1 | S01 |
| .....ugacagagaagagaguUagcac.....                                                                                                                   | 1    | 1 | S01 |
| .....ugacagagaagagagugagGac.....                                                                                                                   | 1    | 1 | S01 |
| .....ugacUgaagagagugagcac.....                                                                                                                     | 2    | 1 | S01 |
| .....ugacagagaagagUgugagcac.....                                                                                                                   | 1    | 1 | S01 |

## Mature

## Star

|                                                                                                                        |    |   |     |
|------------------------------------------------------------------------------------------------------------------------|----|---|-----|
| auucuugcgacauagaaa <u>ugacagagaagagagugagcacacagaggcacuuguauaagcuuauacuuuugcuuuugcgugcucacuuucuuucuguca</u> gcuuccagug |    |   |     |
| .....ugacagagaagagagugUgcac.....                                                                                       | 3  | 1 | S01 |
| .....ugacagagaagagagCgagcac.....                                                                                       | 14 | 1 | S01 |
| .....ugacagagaagagagugGgcac.....                                                                                       | 6  | 1 | S01 |
| .....ugacagagaagagagugagAAC.....                                                                                       | 1  | 1 | S01 |
| .....ugacagagaagagagGgagcac.....                                                                                       | 17 | 1 | S01 |
| .....uAACagagaagagagugagcac.....                                                                                       | 1  | 1 | S01 |
| .....ugacagagaagagGgugagcac.....                                                                                       | 12 | 1 | S01 |
| .....ugacagagaagagagugagNac.....                                                                                       | 1  | 1 | S01 |
| .....ugacagagaagagagugaACac.....                                                                                       | 4  | 1 | S01 |
| .....ugacagagaagGgagugagcac.....                                                                                       | 6  | 1 | S01 |
| .....ugacagagGgagagugagcac.....                                                                                        | 9  | 1 | S01 |
| .....ugacGgaagagagugagcac.....                                                                                         | 8  | 1 | S01 |
| .....Ngacagagaagagagugagcac.....                                                                                       | 3  | 1 | S01 |
| .....ugacagagaagUgagugagcac.....                                                                                       | 1  | 1 | S01 |
| .....ugacagagaagagagugaUcac.....                                                                                       | 1  | 1 | S01 |
| .....ugacagaaaAagagugagcac.....                                                                                        | 2  | 1 | S01 |
| .....ugacagagaagagagugagcGc.....                                                                                       | 12 | 1 | S01 |
| .....ugaAagaagagagugagcac.....                                                                                         | 3  | 1 | S01 |
| .....ugacagagaAagugagcac.....                                                                                          | 2  | 1 | S01 |
| .....ugacagagaagCagugagcac.....                                                                                        | 1  | 1 | S01 |
| .....ugacagagaagagaCugagcac.....                                                                                       | 1  | 1 | S01 |
| .....Ggacagagaagagugagcac.....                                                                                         | 2  | 1 | S01 |
| .....ugaGagaagagagugagcac.....                                                                                         | 1  | 1 | S01 |
| .....ugacagagaagagugagcaA.....                                                                                         | 18 | 1 | S01 |
| .....ugacagUagagagugagcac.....                                                                                         | 3  | 1 | S01 |
| .....ugacaAaagagagugagcac.....                                                                                         | 1  | 1 | S01 |
| .....ugGcagaagagagugagcac.....                                                                                         | 10 | 1 | S01 |
| .....ugUcagaagagagugagcac.....                                                                                         | 1  | 1 | S01 |
| .....uCacagaagagagugagcac.....                                                                                         | 1  | 1 | S01 |
| .....ugacGgaagagagugagcacac.....                                                                                       | 1  | 1 | S01 |
| .....ugacagagaagagugagcacC.....                                                                                        | 42 | 1 | S01 |
| .....ugacagCagagagugagcacac.....                                                                                       | 1  | 1 | S01 |
| .....ugacagagaagagugagcacG.....                                                                                        | 2  | 1 | S01 |
| .....ugacagagaagagugagcacU.....                                                                                        | 31 | 1 | S01 |
| .....ugacagagaagagugagcacac.....                                                                                       | 16 | 0 | S01 |
| .....ugacagagaagagugagcacac.....                                                                                       | 1  | 0 | S01 |
| .....ugacagagaagagugagcacCc.....                                                                                       | 1  | 1 | S01 |
| .....gacagagaagagugagca.....                                                                                           | 2  | 0 | S01 |
| .....gacagagaagagugagcac.....                                                                                          | 1  | 0 | S01 |
| .....gacagagaagagugagcacac.....                                                                                        | 2  | 0 | S01 |
| .....acagagaagagugagcac.....                                                                                           | 6  | 0 | S01 |
| .....acagaagagagugagcacac.....                                                                                         | 25 | 0 | S01 |
| .....acagaagagagugagcacU.....                                                                                          | 3  | 1 | S01 |
| .....acagaagagagugagcacC.....                                                                                          | 1  | 1 | S01 |
| .....acagaagagagugagcacG.....                                                                                          | 2  | 1 | S01 |
| .....acagaagGgagugagcacac.....                                                                                         | 1  | 1 | S01 |
| .....acagaagagagugagcacac.....                                                                                         | 14 | 0 | S01 |
| .....acagaagagagugagcacacC.....                                                                                        | 12 | 1 | S01 |
| .....acagaagagagugagcacacU.....                                                                                        | 12 | 1 | S01 |
| .....cagaagagagugagcacac.....                                                                                          | 1  | 0 | S01 |
| .....cagaagagagugagcacU.....                                                                                           | 2  | 1 | S01 |
| .....cagaagaAagugagcacac.....                                                                                          | 1  | 1 | S01 |
| .....cagaagagagugagcacac.....                                                                                          | 3  | 0 | S01 |
| .....cagaagagagugagcacCc.....                                                                                          | 1  | 1 | S01 |
| .....cagaagagagugagcacacU.....                                                                                         | 1  | 1 | S01 |
| .....gugcucacuuucuuucug.....                                                                                           | 1  | 0 | S01 |
| .....gugcucacuuucuuucugG.....                                                                                          | 1  | 1 | S01 |
| .....gugcucaAuuucuuucuguc.....                                                                                         | 1  | 1 | S01 |
| .....gugcucacuuucuuuUuguc.....                                                                                         | 1  | 1 | S01 |
| .....gugcucacuuucuuucCguc.....                                                                                         | 1  | 1 | S01 |
| .....gugcucacuuucuuucuguU.....                                                                                         | 4  | 1 | S01 |
| .....gugcucacuuucuuucugCc.....                                                                                         | 1  | 1 | S01 |
| .....gugcucacuuucuuucuguA.....                                                                                         | 1  | 1 | S01 |
| .....gugcucacuCcuuuucuguc.....                                                                                         | 1  | 1 | S01 |
| .....gugcucacuuucuuucuguc.....                                                                                         | 32 | 0 | S01 |
| .....gugcucacuuucuuuUuguca.....                                                                                        | 1  | 1 | S01 |
| .....gugcucacuuucuuucugucG.....                                                                                        | 3  | 1 | S01 |
| .....gugcucacuuucuuucugucC.....                                                                                        | 4  | 1 | S01 |
| .....gugcucacuuucuuucugucU.....                                                                                        | 2  | 1 | S01 |
| .....gugcucacuuuCcuuuucuguca.....                                                                                      | 1  | 1 | S01 |

## Mature

## Star

auucuugcgacauagaaaauugacagaagagagagacacacagaggcacuuguauaagcuuauacuuuugcuuuugcgugcucacuuucucuucugucagcuuccagug

|                                    |    |   |     |
|------------------------------------|----|---|-----|
| .....gugcucacuuucucuucucuUuca..... | 3  | 1 | S01 |
| .....gugcucacuuucucuucuguca.....   | 67 | 0 | S01 |
| .....Nugcucacuuucucuucuguca.....   | 1  | 1 | S01 |
| .....gugcucCcuucucuucuguca.....    | 2  | 1 | S01 |
| .....gCgucacuuucucuucuguca.....    | 1  | 1 | S01 |
| .....gugcucacuuUucuucuguca.....    | 1  | 1 | S01 |
| .....gugcucacuuucucuGcuguca.....   | 1  | 1 | S01 |
| .....gugcucacuuucucuucUuca.....    | 1  | 1 | S01 |
| .....Augcucacuuucucuucuguca.....   | 1  | 1 | S01 |
| .....gugcucacuuucucuucugucag.....  | 2  | 0 | S01 |
| .....gugcucacuuucucuucugucaC.....  | 1  | 1 | S01 |
| .....ugcucacCucuucuucugu.....      | 1  | 1 | S01 |
| .....ugcucacuuucucuuuAuguc.....    | 1  | 1 | S01 |
| .....ugcucacuuucucuucuguc.....     | 16 | 0 | S01 |
| .....ugcucacuuucucuucuguU.....     | 1  | 1 | S01 |
| .....ugcucacuuucucuucuguca.....    | 4  | 0 | S01 |
| .....ugcucacuuucucuucugucag.....   | 25 | 0 | S01 |
| .....ugcucacuuucucuucugucaA.....   | 3  | 1 | S01 |
| .....ugcucacuAucuucugucag.....     | 1  | 1 | S01 |
| .....ugcucacuuucucuucugucagU.....  | 2  | 1 | S01 |
| .....ugcucacuuucucuucugucagA.....  | 1  | 1 | S01 |
| .....ugcucacuuucucuucugucagc.....  | 3  | 0 | S01 |
| .....ugcucacuuucucuucugucagcA..... | 1  | 1 | S01 |
| .....gcucacuuucucuucugC.....       | 2  | 1 | S01 |
| .....gcucacuuucucuucugu.....       | 6  | 0 | S01 |
| .....gcucacuuucGcuucuguc.....      | 1  | 1 | S01 |
| .....gcucacuuucucuucuguc.....      | 35 | 0 | S01 |
| .....gcucacuuucucuucuguU.....      | 2  | 1 | S01 |
| .....gcucCcuucucuucuguc.....       | 1  | 1 | S01 |
| .....gcucacuuucucuucuguA.....      | 1  | 1 | S01 |
| .....gcucacuuucucuucuguca.....     | 5  | 0 | S01 |
| .....gcucacuuucucuucugucG.....     | 1  | 1 | S01 |
| .....gcucacuuucucuucugucU.....     | 1  | 1 | S01 |
| .....Acucacuuucucuucugucag.....    | 1  | 1 | S01 |
| .....gcucacuuUucuucugucag.....     | 2  | 1 | S01 |
| .....gcucacuuucGcuucugucag.....    | 1  | 1 | S01 |
| .....gcucacuuucucuucugucaU.....    | 1  | 1 | S01 |
| .....gcucacCucuucuucugucag.....    | 2  | 1 | S01 |
| .....gcucacuuAucuucugucag.....     | 1  | 1 | S01 |
| .....Ucucacuuucucuucugucag.....    | 1  | 1 | S01 |
| .....gcucacuuucucuucCgucag.....    | 3  | 1 | S01 |
| .....gcucacuuucucuuuUugucag.....   | 1  | 1 | S01 |
| .....gcucacuuucucuucugucag.....    | 70 | 0 | S01 |
| .....gcucacuuucucuucugucaA.....    | 4  | 1 | S01 |
| .....gcucacuuucucuucugucGg.....    | 2  | 1 | S01 |
| .....gcucacuuucucuCucugucag.....   | 1  | 1 | S01 |
| .....Acucacuuucucuucugucagc.....   | 1  | 1 | S01 |
| .....gcucacuuucucuucugucagc.....   | 1  | 1 | S01 |
| .....gcucacuuucucuucugGeagc.....   | 1  | 1 | S01 |
| .....gcucacuuucucuucugucUgc.....   | 1  | 1 | S01 |
| .....gcucacuuucucuucugucagc.....   | 40 | 0 | S01 |
| .....gcucacuuucucuucugucagA.....   | 2  | 1 | S01 |
| .....gcucCcuucucuucugucagc.....    | 1  | 1 | S01 |
| .....gcucacuuucucuuuUugucagc.....  | 1  | 1 | S01 |
| .....gcCcacuuucucuucugucagc.....   | 1  | 1 | S01 |
| .....gcucacuuucucuucugucagU.....   | 5  | 1 | S01 |
| .....gcucacuGcuuucugucagc.....     | 1  | 1 | S01 |
| .....gcucacuuucucuucUucagc.....    | 1  | 1 | S01 |
| .....gcucacuuucucuucugucagcu.....  | 16 | 0 | S01 |
| .....gcucacuuucucuucugucagcA.....  | 1  | 1 | S01 |
| .....geuUacuucucuucugucagcu.....   | 1  | 1 | S01 |
| .....gcucacuuucucuucugucagUu.....  | 1  | 1 | S01 |
| .....gcucacuuucucuucugucagcuu..... | 1  | 0 | S01 |
| .....cucacuuucucuucugucag.....     | 1  | 0 | S01 |
| .....ucacuuucucuucugucGgc.....     | 1  | 1 | S01 |
| .....ucacuuucucuucugucagc.....     | 1  | 0 | S01 |
| .....ucacuuucucuucugucagcu.....    | 1  | 0 | S01 |
| .....ucacuuucucuucugucagcA.....    | 1  | 1 | S01 |
| .....ucacuuucucuucugucagcC.....    | 1  | 1 | S01 |
| .....ucacuuucucuucugucagcuu.....   | 2  | 0 | S01 |

## Mature

## Star

auucuuugcgacauagaaaugacagagaagagugagcacacagaggcacuuguuaaagcuuauacuuuuugcuuuugcgugcucacuuucuuucugucagcuuccagug

|                                      |     |   |     |
|--------------------------------------|-----|---|-----|
| .....ucacuuucuuucuuucugucagcuuc..... | 1   | 0 | S01 |
| .....cacuuucuuucugucag.....          | 3   | 0 | S01 |
| .....cacuuucuuucugucagc.....         | 4   | 0 | S01 |
| .....                                |     |   |     |
| .....aaugacagaagagagAgagc.....       | 1   | 1 | S02 |
| .....aaugacagaagagagugagc.....       | 2   | 0 | S02 |
| .....auugacagaagagagugagc.....       | 6   | 0 | S02 |
| .....auugacagaagagagAgagc.....       | 1   | 1 | S02 |
| .....auugacagaagagagugagcac.....     | 1   | 0 | S02 |
| .....uugacagaagagagugaA.....         | 1   | 1 | S02 |
| .....uugacagaagagagugag.....         | 2   | 0 | S02 |
| .....uugacagaagagagugaCc.....        | 1   | 1 | S02 |
| .....uugacagaagagagugagU.....        | 9   | 1 | S02 |
| .....uugacagaagagagCgagc.....        | 1   | 1 | S02 |
| .....uugacCgaagagagugagc.....        | 1   | 1 | S02 |
| .....uugacagaagagGgugagc.....        | 1   | 1 | S02 |
| .....uugacagaGgagagugagc.....        | 2   | 1 | S02 |
| .....uugacagaagagaguuAagc.....       | 1   | 1 | S02 |
| .....uugacagaagagagugagA.....        | 2   | 1 | S02 |
| .....uugacagaagagagugagc.....        | 100 | 0 | S02 |
| .....uugacagaagagagugagG.....        | 1   | 1 | S02 |
| .....uugacagaagagagGgagca.....       | 1   | 1 | S02 |
| .....uugacagaagagagugagAa.....       | 1   | 1 | S02 |
| .....uugacGgaagagagugagca.....       | 1   | 1 | S02 |
| .....uugacagaagagagugagcG.....       | 5   | 1 | S02 |
| .....uugacagGagagagugagca.....       | 1   | 1 | S02 |
| .....uugGcagaagagagugagca.....       | 1   | 1 | S02 |
| .....uugacagaagagagugagcU.....       | 1   | 1 | S02 |
| .....uugacagaaUagagugagca.....       | 1   | 1 | S02 |
| .....uugacagaagagagugagca.....       | 32  | 0 | S02 |
| .....uugacagaagagagugaAcac.....      | 2   | 1 | S02 |
| .....uAgacagaagagagugagcac.....      | 1   | 1 | S02 |
| .....uugacagaagagagugagUac.....      | 4   | 1 | S02 |
| .....Gugacagaagagagugagcac.....      | 1   | 1 | S02 |
| .....uugacagaagagaguuUagcac.....     | 1   | 1 | S02 |
| .....uugacagaagGgagugagcac.....      | 9   | 1 | S02 |
| .....uugaGagaagagagugagcac.....      | 1   | 1 | S02 |
| .....uugacagaagagagugagcGc.....      | 10  | 1 | S02 |
| .....uugacagaagagagGgagcac.....      | 13  | 1 | S02 |
| .....uuUacagaagagagugagcac.....      | 2   | 1 | S02 |
| .....uugacagaGgagagugagcac.....      | 1   | 1 | S02 |
| .....uugacacAaagagagugagcac.....     | 1   | 1 | S02 |
| .....uugacagaagagagugagGac.....      | 3   | 1 | S02 |
| .....uugacagaagagagugagcUc.....      | 1   | 1 | S02 |
| .....uugacagaagagagugGgcac.....      | 9   | 1 | S02 |
| .....uugacCgaagagagugagcac.....      | 1   | 1 | S02 |
| .....uuCacagaagagagugagcac.....      | 1   | 1 | S02 |
| .....uCgacagaagagagugagcac.....      | 4   | 1 | S02 |
| .....uugacagaCgagagugagcac.....      | 1   | 1 | S02 |
| .....uugacaCaagagagugagcac.....      | 1   | 1 | S02 |
| .....uugacagaagCgagugagcac.....      | 2   | 1 | S02 |
| .....uugacagaagagagCgagcac.....      | 5   | 1 | S02 |
| .....Cugacagaagagagugagcac.....      | 3   | 1 | S02 |
| .....uugacagaagagagugagcaA.....      | 15  | 1 | S02 |
| .....uugacagaagagagugUgcac.....      | 2   | 1 | S02 |
| .....uugaUagaagagagugagcac.....      | 1   | 1 | S02 |
| .....uugacagaagagagugagcaG.....      | 4   | 1 | S02 |
| .....uugacagaagagaguuAagcac.....     | 1   | 1 | S02 |
| .....uugacGgaagagagugagcac.....      | 5   | 1 | S02 |
| .....uugacagaagagagugagcaU.....      | 119 | 1 | S02 |
| .....uugacagaagagagugaCcac.....      | 1   | 1 | S02 |
| .....uugaAagaagagagugagcac.....      | 1   | 1 | S02 |
| .....uugGcagaagagagugagcac.....      | 10  | 1 | S02 |
| .....uugacagaagagagCgugagcac.....    | 1   | 1 | S02 |
| .....uugacagaagagagugaUcac.....      | 2   | 1 | S02 |
| .....uugacagaagagagugagcCc.....      | 2   | 1 | S02 |
| .....uugacUgaagagagugagcac.....      | 2   | 1 | S02 |
| .....uugacagGagagagugagcac.....      | 4   | 1 | S02 |
| .....uugacagaagagGgugagcac.....      | 7   | 1 | S02 |
| .....uugacagaaAagagugagcac.....      | 3   | 1 | S02 |

## Mature

## Star

auucuuugcgacauagaaaauugacagagaagagagugagcacacagaggccacuuguuaaagcuuauacuunuuugcunuuugcgugcucacacuuucuuugucagcuuccagug

|                                      |      |   |     |
|--------------------------------------|------|---|-----|
| .....uugCcagaagagagugagcac.....      | 1    | 1 | S02 |
| .....uugacagagaagagagugagAAC.....    | 4    | 1 | S02 |
| .....uugacagagaagagagugagcac.....    | 1150 | 0 | S02 |
| .....uugacagUagagagugagcac.....      | 2    | 1 | S02 |
| .....uugacagagaagagagugagcacC.....   | 26   | 1 | S02 |
| .....uugacagagaagagagugagcacU.....   | 16   | 1 | S02 |
| .....uugacagagaagagagugagcacaca..... | 4    | 0 | S02 |
| .....uugacagagaagagagAgagcacaca..... | 1    | 1 | S02 |
| .....uugacagagaagagagugagcacG.....   | 2    | 1 | S02 |
| .....uugacagagaagagagugagcacacU..... | 1    | 1 | S02 |
| .....uugacagagaagagagugagcacUc.....  | 1    | 1 | S02 |
| .....ugacagagaagagagugagU.....       | 29   | 1 | S02 |
| .....ugacagaaCagagugagc.....         | 1    | 1 | S02 |
| .....ugacagagaagagagugGgc.....       | 1    | 1 | S02 |
| .....ugacagagaagagagugagA.....       | 1    | 1 | S02 |
| .....ugacagagaagagagUagc.....        | 1    | 1 | S02 |
| .....ugacCGaagagagugagc.....         | 1    | 1 | S02 |
| .....ugacagagaagagagugagc.....       | 179  | 0 | S02 |
| .....ugacagaCgagagugagc.....         | 2    | 1 | S02 |
| .....ugacagagaagGgagugagc.....       | 1    | 1 | S02 |
| .....ugacagagaagagGgugagc.....       | 2    | 1 | S02 |
| .....Cgacagagaagagagugagca.....      | 1    | 1 | S02 |
| .....ugacagagaagagagugagcG.....      | 19   | 1 | S02 |
| .....ugacagagaagagagugagca.....      | 120  | 0 | S02 |
| .....ugacagaGgagagugagca.....        | 2    | 1 | S02 |
| .....ugacagagaagagagCgagca.....      | 1    | 1 | S02 |
| .....ugacagagaagagagugagcU.....      | 4    | 1 | S02 |
| .....ugacagagaagagagugUgcac.....     | 3    | 1 | S02 |
| .....ugacagagaagaAagugagcac.....     | 3    | 1 | S02 |
| .....ugacagagaagagagugagUac.....     | 2    | 1 | S02 |
| .....ugacagagaagagagugagAAC.....     | 1    | 1 | S02 |
| .....ugacagagaagagagugaAAC.....      | 3    | 1 | S02 |
| .....Ngacagagaagagagugagcac.....     | 2    | 1 | S02 |
| .....uAACagaagagagugagcac.....       | 3    | 1 | S02 |
| .....ugacagagaagagaAagagcac.....     | 2    | 1 | S02 |
| .....Agacagagaagagagugagcac.....     | 1    | 1 | S02 |
| .....ugaUagaagagagugagcac.....       | 1    | 1 | S02 |
| .....ugacagaGgagagugagcac.....       | 3    | 1 | S02 |
| .....ugacagagaagagaUagagcac.....     | 1    | 1 | S02 |
| .....ugacagagaagagagugagcac.....     | 1689 | 0 | S02 |
| .....ugacaAaagagagugagcac.....       | 2    | 1 | S02 |
| .....ugacagaaGcagugagcac.....        | 1    | 1 | S02 |
| .....ugGcagaagagagugagcac.....       | 10   | 1 | S02 |
| .....Cgacagagaagagagugagcac.....     | 2    | 1 | S02 |
| .....ugacGgaagagagugagcac.....       | 10   | 1 | S02 |
| .....ugacagagaagagaCugagcac.....     | 1    | 1 | S02 |
| .....ugacagagaagagagCgagcac.....     | 13   | 1 | S02 |
| .....ugacagaaGugagugagcac.....       | 4    | 1 | S02 |
| .....ugacagaUgagagugagcac.....       | 1    | 1 | S02 |
| .....ugacagagaagGgagugagcac.....     | 14   | 1 | S02 |
| .....ugacagagaagagagugagcGc.....     | 5    | 1 | S02 |
| .....ugacagagaagagagugagcUc.....     | 1    | 1 | S02 |
| .....ugacagagaagagaguUagcac.....     | 2    | 1 | S02 |
| .....Ggacagagaagagugagcac.....       | 3    | 1 | S02 |
| .....ugacagagaagagugagcaA.....       | 15   | 1 | S02 |
| .....ugaGagaagagagugagcac.....       | 2    | 1 | S02 |
| .....ugacagaaaAagagugagcac.....      | 2    | 1 | S02 |
| .....ugacagagaagagagugGgcac.....     | 12   | 1 | S02 |
| .....ugCcagaagagagugagcac.....       | 1    | 1 | S02 |
| .....ugacagagaagagagGgagcac.....     | 9    | 1 | S02 |
| .....ugacagagaagagGgugagcac.....     | 9    | 1 | S02 |
| .....ugacagaCgagagugagcac.....       | 1    | 1 | S02 |
| .....ugacagagaagagagugagcaU.....     | 183  | 1 | S02 |
| .....ugacagagaagagugagcaG.....       | 9    | 1 | S02 |
| .....ugacagCagagagugagcac.....       | 3    | 1 | S02 |
| .....ugacagagaagagCgugagcac.....     | 2    | 1 | S02 |
| .....ugaAagaagagagugagcac.....       | 3    | 1 | S02 |
| .....ugacUgaagagagugagcac.....       | 2    | 1 | S02 |
| .....ugacagagaagagagugagcacU.....    | 24   | 1 | S02 |
| .....ugGcagaagagagugagcacaca.....    | 1    | 1 | S02 |

## Mature

## Star

|                                                                                                                |    |   |     |
|----------------------------------------------------------------------------------------------------------------|----|---|-----|
| auucuuugcgacauagaaaauugacagaagagagugagcacacagaggcacuuguauaagcuuauacuuuugcuuuugcgugcucacuuucuuucugucagcuuccagug |    |   |     |
| .....ugacagaagagagugagcacG.....                                                                                | 8  | 1 | S02 |
| .....ugacagaagagagugagcacC.....                                                                                | 44 | 1 | S02 |
| .....ugacagaagagagugagcacaca.....                                                                              | 28 | 0 | S02 |
| .....ugacagaagagagugagcgca.....                                                                                | 1  | 1 | S02 |
| .....gacagaagagagugagcgG.....                                                                                  | 1  | 1 | S02 |
| .....gacagaagagagugagcac.....                                                                                  | 1  | 0 | S02 |
| .....acagaagagagugagcac.....                                                                                   | 2  | 0 | S02 |
| .....acagaagagagugagcgaca.....                                                                                 | 7  | 0 | S02 |
| .....acagaagagagugagcgacC.....                                                                                 | 2  | 1 | S02 |
| .....acagaagagagugagcgacac.....                                                                                | 10 | 0 | S02 |
| .....acagaagagagugagcgacaU.....                                                                                | 1  | 1 | S02 |
| .....acagaagagagugagcgacacU.....                                                                               | 5  | 1 | S02 |
| .....acagaagagagugagcgacacG.....                                                                               | 1  | 1 | S02 |
| .....acagaagagagugagcgacacC.....                                                                               | 12 | 1 | S02 |
| .....cagaagagagugagcgaca.....                                                                                  | 1  | 0 | S02 |
| .....cagaagagagugagcgacU.....                                                                                  | 1  | 1 | S02 |
| .....cagaagagagugaAcacac.....                                                                                  | 1  | 1 | S02 |
| .....cagaagagagugagcgacac.....                                                                                 | 1  | 0 | S02 |
| .....cagaagagagugagcgacacU.....                                                                                | 1  | 1 | S02 |
| .....cagaagagagugagcgacacC.....                                                                                | 1  | 1 | S02 |
| .....gugcucacuuucuuucugug.....                                                                                 | 2  | 0 | S02 |
| .....gugcucacuuucuuucugugU.....                                                                                | 1  | 1 | S02 |
| .....gugcucacuuucuuucuguc.....                                                                                 | 14 | 0 | S02 |
| .....gugcCcacuuucuuucuguc.....                                                                                 | 1  | 1 | S02 |
| .....gugcucacuuucuuucuguca.....                                                                                | 1  | 1 | S02 |
| .....gugcucCcuucuuucuguca.....                                                                                 | 1  | 1 | S02 |
| .....gugcucacuuucuuucuguca.....                                                                                | 34 | 0 | S02 |
| .....gugcucacuuucuuucugucG.....                                                                                | 4  | 1 | S02 |
| .....guCcuacuuucuuucuguca.....                                                                                 | 1  | 1 | S02 |
| .....gugcucacuuucuuucugucC.....                                                                                | 2  | 1 | S02 |
| .....gugcucacuuucuuucugucU.....                                                                                | 2  | 1 | S02 |
| .....Ugugcucacuuucuuucugucag.....                                                                              | 1  | 1 | S02 |
| .....gugcucacuuucuuucugucag.....                                                                               | 1  | 0 | S02 |
| .....ugcucacuuucuuucugug.....                                                                                  | 1  | 0 | S02 |
| .....ugcucacuuucuuucuguc.....                                                                                  | 6  | 0 | S02 |
| .....ugcucacuuucuuucuguca.....                                                                                 | 3  | 0 | S02 |
| .....ugcucacuuucuuucugucG.....                                                                                 | 1  | 1 | S02 |
| .....ugcucacuuucuuucugucaA.....                                                                                | 1  | 1 | S02 |
| .....ugcucacuuucuuucugucag.....                                                                                | 14 | 0 | S02 |
| .....ugcucacuuucuuucugucagc.....                                                                               | 2  | 0 | S02 |
| .....gcucacuuucuuucugC.....                                                                                    | 1  | 1 | S02 |
| .....gcucacuuucuuucugug.....                                                                                   | 3  | 0 | S02 |
| .....gcCcacuuucuuucuguc.....                                                                                   | 1  | 1 | S02 |
| .....gcucacuuucuuucugugU.....                                                                                  | 1  | 1 | S02 |
| .....gcucacuuucuuucuguc.....                                                                                   | 11 | 0 | S02 |
| .....gcucacuuucuuucuguca.....                                                                                  | 1  | 0 | S02 |
| .....gcucacuuucuuucugucG.....                                                                                  | 1  | 1 | S02 |
| .....gcucacuuucuuucugugUag.....                                                                                | 1  | 1 | S02 |
| .....gcucacuuucuuucugucaA.....                                                                                 | 2  | 1 | S02 |
| .....gcCcacuuucuuucugucag.....                                                                                 | 1  | 1 | S02 |
| .....gcucacuuucuuucugucag.....                                                                                 | 25 | 0 | S02 |
| .....gcucacuuucuuucugucagU.....                                                                                | 3  | 1 | S02 |
| .....gcucacuuucuuucugucagc.....                                                                                | 1  | 1 | S02 |
| .....gcucacuuucuuucugucagA.....                                                                                | 1  | 1 | S02 |
| .....gcucacuuucuuucugucagc.....                                                                                | 18 | 0 | S02 |
| .....gcucaAuucuuucugucagc.....                                                                                 | 1  | 1 | S02 |
| .....gcucacuuucuuucugucagcu.....                                                                               | 10 | 0 | S02 |
| .....gcucCcuucuuucugucagcu.....                                                                                | 1  | 1 | S02 |
| .....gcucacuuucuuucugucagcC.....                                                                               | 2  | 1 | S02 |
| .....gcucacuuucuuucugucagcA.....                                                                               | 1  | 1 | S02 |
| .....ucacuuucuuucugucag.....                                                                                   | 1  | 0 | S02 |
| .....cacuuucuuucugucag.....                                                                                    | 1  | 1 | S02 |

[illegible]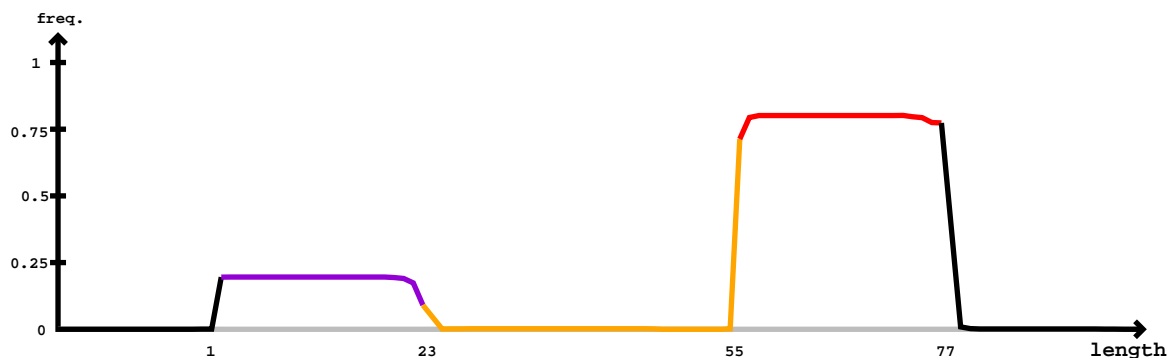

## Mature



## Star

## Mature

|                                                                                                                  |     |   |     |
|------------------------------------------------------------------------------------------------------------------|-----|---|-----|
| gguggaaguuuuugguauaggagggaauugggcaagacuauccuuugaucgguugaugaggcuaaaaguuuuucccaacaccccccauaccguugauuuucccucuacuccu |     |   |     |
| .....uauaggagggaauugggcaaCacu.....                                                                               | 1   | 1 | S01 |
| .....uauaggagggaauugggcaagacu.....                                                                               | 69  | 0 | S01 |
| .....uauaggagggaauugggcaagacuG.....                                                                              | 1   | 1 | S01 |
| .....uauaggagggaauugggcaagacuU.....                                                                              | 1   | 1 | S01 |
| .....uauaggagggaauugggcaagacuCucc.....                                                                           | 1   | 1 | S01 |
| .....auggagggaauugggcaagac.....                                                                                  | 1   | 0 | S01 |
| .....uauccuuugaucgguugCugaggcu.....                                                                              | 1   | 1 | S01 |
| .....ccuuugaucgguugaugaggcu.....                                                                                 | 1   | 0 | S01 |
| .....uuuuCcccaacaccccccauacc.....                                                                                | 1   | 1 | S01 |
| .....uuuuucccaacaccccccauacc.....                                                                                | 1   | 0 | S01 |
| .....uuuuucccaacacccccca.....                                                                                    | 10  | 0 | S01 |
| .....uuuuucccaacaccccccau.....                                                                                   | 1   | 1 | S01 |
| .....uuuuucccaacaccccccau.....                                                                                   | 4   | 0 | S01 |
| .....uuuuucccaacaccccccaua.....                                                                                  | 27  | 0 | S01 |
| .....uuuucUcaacaccccccaua.....                                                                                   | 1   | 1 | S01 |
| .....uuuuucccaaGaccccccauac.....                                                                                 | 1   | 1 | S01 |
| .....uuuuucccaacaccccccauac.....                                                                                 | 2   | 0 | S01 |
| .....uuuuucccGacaccccccauacc.....                                                                                | 5   | 1 | S01 |
| .....uuuuucccaacaccccAcauacc.....                                                                                | 2   | 1 | S01 |
| .....uuGucccaacaccccccauacc.....                                                                                 | 1   | 1 | S01 |
| .....uuuuucccaacaccccccaCacc.....                                                                                | 1   | 1 | S01 |
| .....uuuuUccaacaccccccauacc.....                                                                                 | 1   | 1 | S01 |
| .....Nuuuucccaacaccccccauacc.....                                                                                | 1   | 1 | S01 |
| .....uuuuucccaacacccccCuacc.....                                                                                 | 1   | 1 | S01 |
| .....uuuuucccaacaccccAccauacc.....                                                                               | 2   | 1 | S01 |
| .....uuuuucccaacacGccccauacc.....                                                                                | 1   | 1 | S01 |
| .....uuuuucccaacaccccccauUcc.....                                                                                | 6   | 1 | S01 |
| .....uuuuucccaacacUccccauacc.....                                                                                | 1   | 1 | S01 |
| .....uuuuucccaacaccccUcauacc.....                                                                                | 1   | 1 | S01 |
| .....uuuuucccaacacccccAauacc.....                                                                                | 1   | 1 | S01 |
| .....uuuuucccaacGcccccauacc.....                                                                                 | 2   | 1 | S01 |
| .....uuuuucccCacaccccccauacc.....                                                                                | 1   | 1 | S01 |
| .....uuuuucccaacaccccccauUcc.....                                                                                | 2   | 1 | S01 |
| .....uuuuucccaacaccccccaAacc.....                                                                                | 2   | 1 | S01 |
| .....uuuuucUcaacaccccccauacc.....                                                                                | 1   | 1 | S01 |
| .....uuuuucccaacaccccccauacU.....                                                                                | 175 | 1 | S01 |
| .....Cuuuucccaacaccccccauacc.....                                                                                | 3   | 1 | S01 |
| .....uuuUcccaacaccccccauacc.....                                                                                 | 3   | 1 | S01 |
| .....uuuuucccaacaccccccauUcc.....                                                                                | 1   | 1 | S01 |
| .....uuuuucccaaGaccccccauacc.....                                                                                | 1   | 1 | S01 |
| .....uCuuuucccaacaccccccauacc.....                                                                               | 1   | 1 | S01 |
| .....uuuuucccaCcaccccccauacc.....                                                                                | 1   | 1 | S01 |
| .....uuuuucAcaacaccccccauacc.....                                                                                | 5   | 1 | S01 |
| .....uuuGcccaacaccccccauacc.....                                                                                 | 4   | 1 | S01 |
| .....uuuuucccaaAaccccccauacc.....                                                                                | 4   | 1 | S01 |
| .....uuuuAccaacaccccccauacc.....                                                                                 | 4   | 1 | S01 |
| .....uuuuucccaacacAcccauacc.....                                                                                 | 1   | 1 | S01 |
| .....uuuuucGcaacaccccccauacc.....                                                                                | 3   | 1 | S01 |
| .....uuuuucccaacCcccccauacc.....                                                                                 | 1   | 1 | S01 |
| .....uuuuucccaacaccccccauacG.....                                                                                | 4   | 1 | S01 |
| .....uuuuucccaacaccccccauacA.....                                                                                | 60  | 1 | S01 |
| .....uuuuucccaacacccccUauacc.....                                                                                | 3   | 1 | S01 |
| .....uuuuucccaacaccccccauacc.....                                                                                | 795 | 0 | S01 |
| .....uuuuucccaacacccccGauacc.....                                                                                | 1   | 1 | S01 |
| .....uuuuGccaacaccccccauacc.....                                                                                 | 1   | 1 | S01 |
| .....uuuuucccaacaccccccauaccU.....                                                                               | 2   | 1 | S01 |
| .....uuuuucccaacaccccccauaccgG.....                                                                              | 1   | 1 | S01 |
| .....uuuuucccaacaccccccauaccgu.....                                                                              | 1   | 0 | S01 |
| .....uuuuucccaacaccccccauaccguC.....                                                                             | 1   | 1 | S01 |
| .....uuuuucccaacaccccccauaccguu.....                                                                             | 1   | 0 | S01 |
| .....uuuuucccaacaccccccau.....                                                                                   | 2   | 0 | S01 |
| .....uuuuucccaacaccccccaua.....                                                                                  | 1   | 0 | S01 |
| .....uuAcccaacaccccccauacc.....                                                                                  | 1   | 1 | S01 |
| .....uuuuucccaacacUccccauacc.....                                                                                | 1   | 1 | S01 |
| .....uuuUccaacaccccccauacc.....                                                                                  | 3   | 1 | S01 |
| .....uuuAccaacaccccccauacc.....                                                                                  | 1   | 1 | S01 |
| .....uuuuucccaacaccccccauGcc.....                                                                                | 1   | 1 | S01 |
| .....uuuuucccaacacAccccccauacc.....                                                                              | 1   | 1 | S01 |
| .....uuuuucccaacaccccccauacc.....                                                                                | 87  | 0 | S01 |
| .....uuuuucccaaUaccccccauacc.....                                                                                | 1   | 1 | S01 |

## Star

## Mature

gguggaaguuuuugguauaggagggaauugggcaagacuauccuuugauccguugaugaggcuaaaaguuuuucccaacaccccccauaccguugauuuucccucuacuccu

|                                     |     |   |     |
|-------------------------------------|-----|---|-----|
| .....uuucccGacaccccccauacc.....     | 3   | 1 | S01 |
| .....uuucccaacGcccccauacc.....      | 1   | 1 | S01 |
| .....uuucccaacaccccccauacA.....     | 3   | 1 | S01 |
| .....Guucccaacaccccccauacc.....     | 2   | 1 | S01 |
| .....uuucccaacaccccccauacU.....     | 22  | 1 | S01 |
| .....uuucccaacacAcccccauacc.....    | 1   | 1 | S01 |
| .....uuucccaacaccccccaGacc.....     | 1   | 1 | S01 |
| .....uuucAcaacaccccccauacc.....     | 1   | 1 | S01 |
| .....uuucccaacaccccccauaccg.....    | 2   | 0 | S01 |
| .....uucccaacaccUcccaua.....        | 1   | 1 | S01 |
| .....uucccaacaccccccaua.....        | 1   | 0 | S01 |
| .....uuUccaacaccccccauaccgu.....    | 4   | 1 | S01 |
| .....uucccaacaccUcccauaccgu.....    | 3   | 1 | S01 |
| .....uuUccaacaccccccauaccguu.....   | 1   | 1 | S01 |
| .....gguauggagggaauugggcaag.....    | 1   | 0 | S02 |
| .....uauggagggaauugggcaU.....       | 1   | 1 | S02 |
| .....uauggagggaauugggcaag.....      | 2   | 0 | S02 |
| .....uauggagggaauugggcaaga.....     | 7   | 0 | S02 |
| .....uauggagggaauugggcaagac.....    | 46  | 0 | S02 |
| .....uauAgagggaauugggcaagac.....    | 1   | 1 | S02 |
| .....uauUgagggaauugggcaagac.....    | 1   | 1 | S02 |
| .....uauggagggaauugggcaagaU.....    | 8   | 1 | S02 |
| .....uauggagggauggggcaagac.....     | 1   | 1 | S02 |
| .....uauggagggaauugggGaaagac.....   | 1   | 1 | S02 |
| .....uauggagggaauugggcaagacC.....   | 5   | 1 | S02 |
| .....uauggagggaauugggcaagacu.....   | 48  | 0 | S02 |
| .....uauggagggaauugggcaaAacu.....   | 1   | 1 | S02 |
| .....uauggagggaauugggcaagacG.....   | 6   | 1 | S02 |
| .....uauggagggaauugggcaagGcu.....   | 1   | 1 | S02 |
| .....uauggagggUuugggcaagacu.....    | 1   | 1 | S02 |
| .....uauggagggaauugggcaagaUu.....   | 3   | 1 | S02 |
| .....uauggagggaauugggcaagacA.....   | 3   | 1 | S02 |
| .....uauggagggaauugggcaagacuC.....  | 1   | 1 | S02 |
| .....uauggagggaauugggcaagacuU.....  | 1   | 1 | S02 |
| .....uuugauccguugaugaggA.....       | 1   | 1 | S02 |
| .....uuugauccguugaugaggcu.....      | 1   | 0 | S02 |
| .....uuuuucccaacaccccccauacG.....   | 1   | 1 | S02 |
| .....uuuuucccaacaccccccaua.....     | 5   | 0 | S02 |
| .....uuuuucccaacaccccccauU.....     | 1   | 1 | S02 |
| .....uuuuucccaaAaccccccauacc.....   | 1   | 1 | S02 |
| .....uuuuucccaacacGcccccauacc.....  | 1   | 1 | S02 |
| .....uuGuucccaacaccccccauacc.....   | 1   | 1 | S02 |
| .....Cuuuucccaacaccccccauacc.....   | 2   | 1 | S02 |
| .....uuuuucccaacGcccccauacc.....    | 1   | 1 | S02 |
| .....uuuuucccaacaccccccauacG.....   | 12  | 1 | S02 |
| .....uuuuucccaacaccccccauacA.....   | 12  | 1 | S02 |
| .....uuuucAcaacaccccccauacc.....    | 1   | 1 | S02 |
| .....uuuuucccaacaccccccaCacc.....   | 1   | 1 | S02 |
| .....uuuuucccaaGaccccccauacc.....   | 1   | 1 | S02 |
| .....uuuuucccaacaccccccauaAc.....   | 1   | 1 | S02 |
| .....uAuucccaacaccccccauacc.....    | 1   | 1 | S02 |
| .....uuuuucccGacaccccccauacc.....   | 2   | 1 | S02 |
| .....uuuuucccaacaUcccccauacc.....   | 1   | 1 | S02 |
| .....uuuuucccaacaccUccauacc.....    | 1   | 1 | S02 |
| .....uuuuucccaacaccccccauacc.....   | 197 | 0 | S02 |
| .....uuuuucccaacacccccccGuacc.....  | 2   | 1 | S02 |
| .....uuuuucccaacaccccccauacU.....   | 35  | 1 | S02 |
| .....uuuuucccaacaccccccauGcc.....   | 1   | 1 | S02 |
| .....uuuuucccaGcaccccccauacc.....   | 1   | 1 | S02 |
| .....uuuuUccaacaccccccauacc.....    | 1   | 1 | S02 |
| .....uuuuuccGaacaccccccauacc.....   | 1   | 1 | S02 |
| .....uuuuucccaacaccccccauaccUu..... | 1   | 1 | S02 |
| .....uuuuucccaacaccccccaua.....     | 1   | 0 | S02 |
| .....uuuuucccaacaccccccauacc.....   | 14  | 0 | S02 |
| .....uuuuucccaacaccccccauacU.....   | 5   | 1 | S02 |
| .....uuuuucccaacaccccccauacG.....   | 2   | 1 | S02 |
| .....uuuuucccaacaccccccauacA.....   | 3   | 1 | S02 |
| .....uuuuucccaacacccccAcauacc.....  | 1   | 1 | S02 |
| .....uuucccaGcaccccccauacc.....     | 1   | 1 | S02 |

## Star

## Mature

|                                                                                                                |   |   |     |
|----------------------------------------------------------------------------------------------------------------|---|---|-----|
| gguggaaguuuuugguauggagggauugggcaagacuauccuuugauccguugaugaggcuaaaaguuuuucccaacaccccccauaccguugauuuucccucuaucucu |   |   |     |
| .....uuCcccaacaccccccauacc.....                                                                                | 1 | 1 | S02 |
| .....uucccaacaccccccauacc.....                                                                                 | 1 | 0 | S02 |
| .....uucccaacacccUcccauacc.....                                                                                | 1 | 1 | S02 |
| .....uucccaacacccUcccauaccgu.....                                                                              | 2 | 1 | S02 |
| .....uucccaacaccccccauaccgu.....                                                                               | 1 | 0 | S02 |
| .....auaccguugauuuucccucua.....                                                                                | 1 | 0 | S02 |
| .....ccguugauuuucccucuauc.....                                                                                 | 1 | 0 | S02 |

5' UTR of the 18S rRNA of the green alga *Chlamydomonas reinhardtii*. The structure is shown as a 3D ribbon diagram with various colored loops and stems. The 5' end is labeled '5' and the 3' end is labeled '3'.

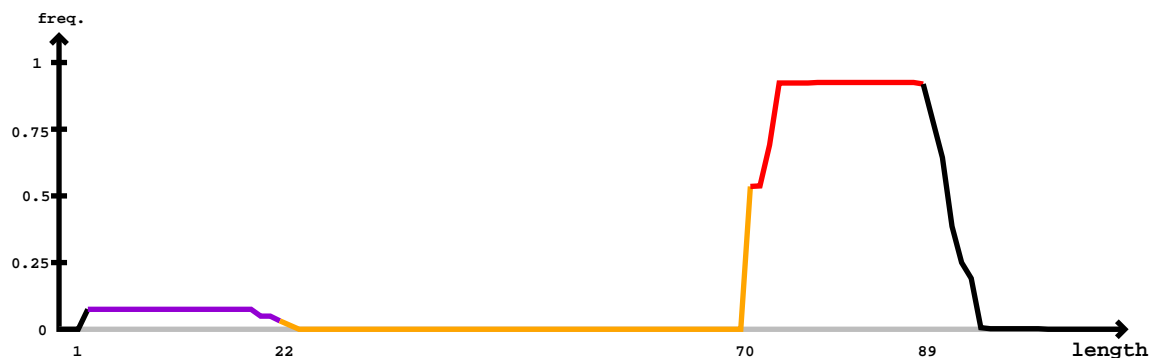

## Mature

## Star

## Mature

ccuaaaacgaccccauaaaagagguguauccucuguggcggcagcggcgggcggcuguggaucgggucaguuuuugauggauccuuaagggguagguaguugggugguagccuug

|                                            |    |   |     |
|--------------------------------------------|----|---|-----|
| .....uugauggauc <u>cuua</u> agggA.....     | 1  | 1 | S01 |
| .....uugauggGucc <u>uuau</u> agggg.....    | 1  | 1 | S01 |
| .....uugauggauc <u>cuua</u> uagggg.....    | 22 | 0 | S01 |
| .....uugauggauc <u>cuua</u> uagggG.....    | 1  | 1 | S01 |
| .....uugauggauc <u>cuua</u> uaggggua.....  | 18 | 0 | S01 |
| .....ugauggauc <u>cuua</u> uagggg.....     | 11 | 0 | S01 |
| .....ugauggauc <u>cuua</u> agggA.....      | 1  | 1 | S01 |
| .....ugauggauc <u>cuua</u> uaggggG.....    | 1  | 1 | S01 |
| .....ugauggauc <u>cuua</u> uAagguag.....   | 1  | 1 | S01 |
| .....ugauggGucc <u>uuau</u> agggguag.....  | 1  | 1 | S01 |
| .....ugauggauc <u>cuua</u> uagggAag.....   | 1  | 1 | S01 |
| .....ugauggauc <u>cuua</u> uagggguaA.....  | 2  | 1 | S01 |
| .....ugauggauc <u>cuua</u> uagggguag.....  | 43 | 0 | S01 |
| .....ugauggauc <u>cu</u> Cauagggguag.....  | 1  | 1 | S01 |
| .....ugauggauc <u>cuua</u> uagCguag.....   | 1  | 1 | S01 |
| .....ugauggauc <u>cu</u> Gauagggguag.....  | 1  | 1 | S01 |
| .....ugauggauc <u>cuua</u> uagggguagu..... | 2  | 0 | S01 |
|                                            |    |   |     |
| .cuaua <u>aacgaccc</u> caucaaaG.....       | 2  | 1 | S02 |
| .cuaua <u>aacgaccc</u> cauaaa.....         | 5  | 0 | S02 |
| .cuaua <u>aacgaccc</u> cauaaaag.....       | 3  | 0 | S02 |
| .cuauaG <u>c</u> gaccccauaaaaga.....       | 1  | 1 | S02 |
| .cuaua <u>aacgaccc</u> cauaaaaga.....      | 5  | 0 | S02 |
| .....uuuugauggauc <u>cuua</u> a.....       | 1  | 0 | S02 |
| .....uuuugauggauA <u>cuua</u> uag.....     | 1  | 1 | S02 |
| .....uuuugauggauc <u>cuua</u> uag.....     | 35 | 0 | S02 |
| .....uuuugauggauc <u>cuua</u> aA.....      | 2  | 1 | S02 |
| .....uuuugauggauc <u>cu</u> Cuag.....      | 1  | 1 | S02 |
| .....uuuugauggauc <u>cuua</u> uagg.....    | 1  | 0 | S02 |
| .....uuuugauggauc <u>cuua</u> uagggA.....  | 4  | 1 | S02 |
| .....uuuugauggauc <u>cuua</u> uaggU.....   | 1  | 1 | S02 |
| .....uuuugauggauc <u>cuua</u> uagCg.....   | 2  | 1 | S02 |
| .....uuuugauggauc <u>cuua</u> uaggg.....   | 35 | 0 | S02 |
| .....uugauggauc <u>cuua</u> uagg.....      | 2  | 0 | S02 |
| .....uugauggauG <u>cuua</u> uagggg.....    | 1  | 1 | S02 |
| .....uugauggauc <u>cuua</u> uagggg.....    | 11 | 0 | S02 |
| .....uugauggauc <u>cuua</u> uagggG.....    | 2  | 1 | S02 |
| .....uugauggauc <u>cuua</u> uagggC.....    | 2  | 1 | S02 |
| .....uugauggauc <u>cuua</u> uaggggU.....   | 1  | 1 | S02 |
| .....uugauggauc <u>cuua</u> uaggggua.....  | 10 | 0 | S02 |
| .....ugauggauc <u>cuua</u> uagggg.....     | 4  | 0 | S02 |
| .....ugauggauc <u>cuua</u> uagggG.....     | 2  | 1 | S02 |
| .....ugauggauc <u>cuua</u> uagggC.....     | 2  | 1 | S02 |
| .....ugauggauc <u>cuua</u> uagggA.....     | 1  | 1 | S02 |
| .....ugauggauc <u>cuua</u> uagggguag.....  | 39 | 0 | S02 |
| .....uAauggauc <u>cuua</u> uagggguag.....  | 1  | 1 | S02 |
| .....ugauggauc <u>cuua</u> uaggggG.....    | 1  | 1 | S02 |
| .....ugaGgggauc <u>cuua</u> uagggguag..... | 1  | 1 | S02 |
| .....ugGuggauc <u>cuua</u> uagggguag.....  | 1  | 1 | S02 |
| .....ggaucc <u>uuau</u> agggguaguuggg..... | 1  | 0 | S02 |

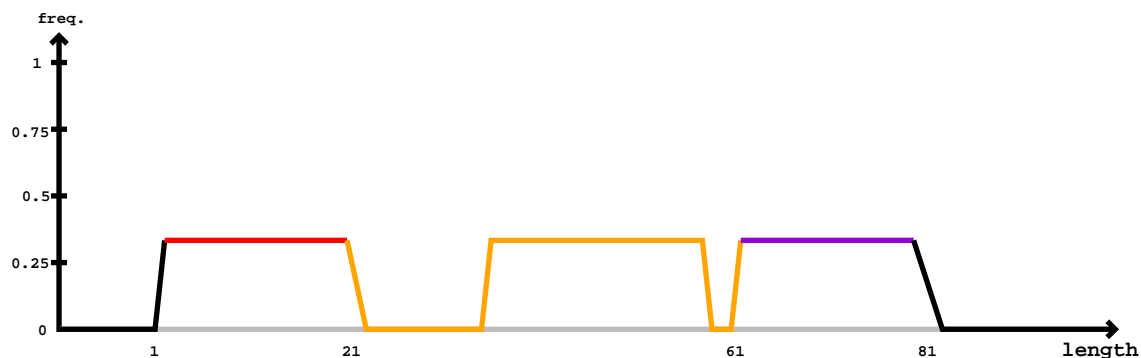

Star

|      |                                                                                                                                   |       |     |
|------|-----------------------------------------------------------------------------------------------------------------------------------|-------|-----|
| 5' - | uguaaucaaa <u>uguaguugcugugaucg</u> uauguuuggguuagaggcgggggugucagaaa <u>uuuuuccuugcgacgauauaugcucugcuu</u> ggau guccacu uucauaugu | -3'   | obs |
|      | uguaaucaaa <u>uguaguugcugugaucg</u> uauguuuggguuagaggcgggggugucagaaa <u>uuuuuccuugcgacgauauaugcucugcuu</u> ggau guccacu uucauaugu |       | exp |
|      | ..(((((((.((((.(.....(((((((((.(((((((.....))))). ....)))...)).)))).))))....)).))))).....                                         | reads | mm  |
|      | ..... <u>uguaguugcugugaucg</u> uaug.....                                                                                          | 1     | 0   |
|      | ..... <u>.gacgauauaugcucugcuC</u> .....                                                                                           | 1     | 1   |
|      | .....gggggugucagaaa <u>uuuuuccu</u> .....                                                                                         | 1     | 0   |
|      |                                                                                                                                   |       | S01 |
|      |                                                                                                                                   |       | S01 |
|      |                                                                                                                                   |       | S02 |



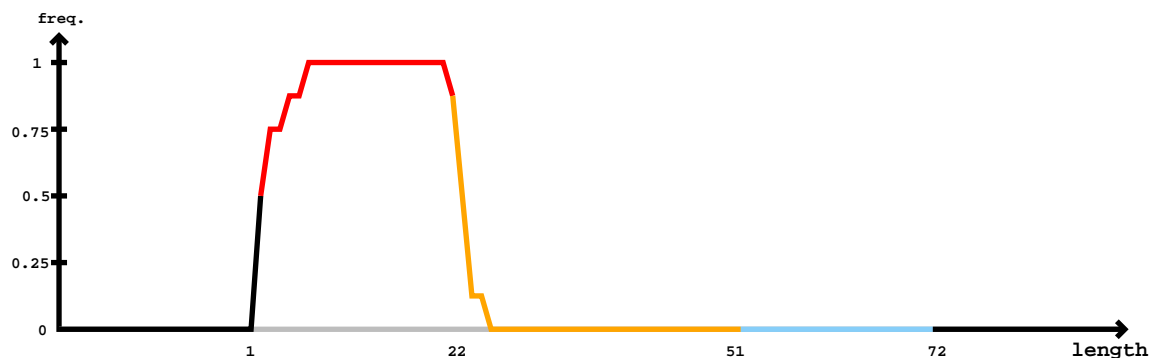

Star



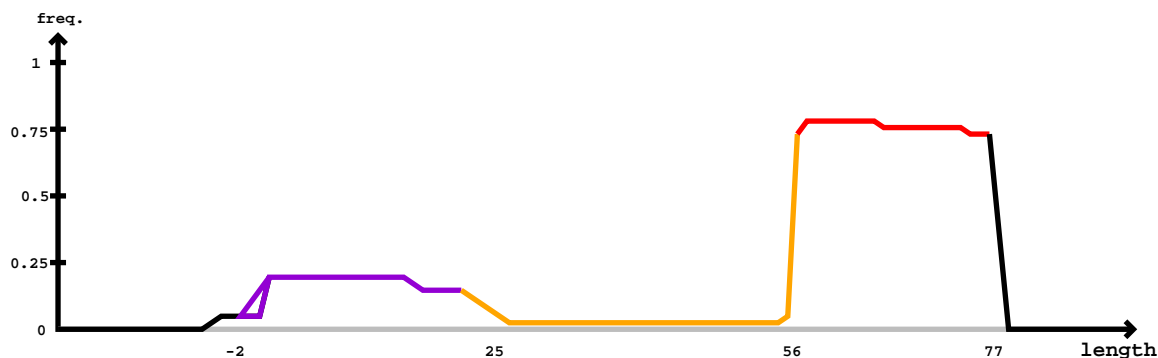

## Mature

[illegible]



Provisional ID : Maple\_Unigene\_BMK.21056\_57975  
Score total : 1.8  
Score for star read(s) : -1.3  
Score for read counts : 0  
Score for mfe : 0.1  
Score for randfold : 0  
Score for cons. seed : 3  
Total read count : 20  
Mature read count : 9  
Loop read count : 5  
Star read count : 6

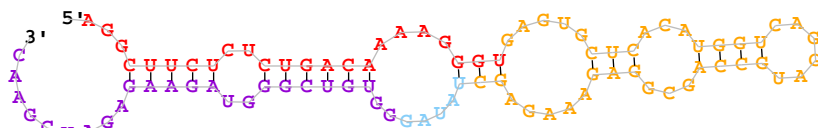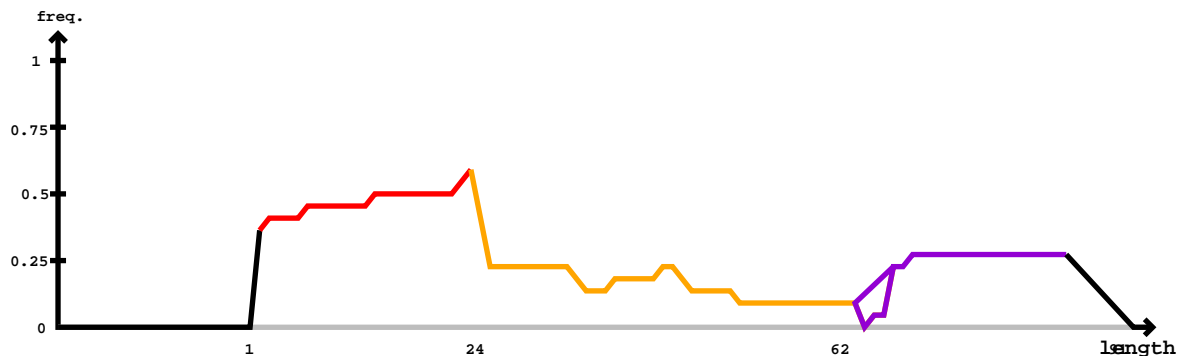

### Mature

### Star

| 5' -                                                                                                               | obs | reads | mm | sample |
|--------------------------------------------------------------------------------------------------------------------|-----|-------|----|--------|
| agaaagacgaagaaggaagaggcuucucucugacaaaagggugagugcucacauaggucaggaugccagcggagaaagagcuaauaggguugucggguagaagagaucaacgaa | -3' |       |    |        |
| agaaagacgaagaaggaagaggcuucucucugacaaaagggugagugcucacauaggucaggaugccagcggagaaagagcuaauaggguugucggguagaagagaucaacgaa | exp |       |    |        |
| .....((.....(((.....(((.....(((.....(((.....)))))).....)))).....)))).....)))).....)))).....)))).....)))).....      |     |       |    |        |
| .....aggcuucucucugacaaaaggggu.....                                                                                 |     | 2     | 0  | S01    |
| .....aggcuucucucugacaaaagAgu.....                                                                                  |     | 1     | 1  | S01    |
| .....aggcuucucGcugacaaaaggggu.....                                                                                 |     | 1     | 1  | S01    |
| .....aggcuucCucugacaaaaggggu.....                                                                                  |     | 1     | 1  | S01    |
| .....aggcuucucucugacaaaagggguA.....                                                                                |     | 1     | 1  | S01    |
| .....ggcuucucucugacaaaaggggu.....                                                                                  |     | 1     | 0  | S01    |
| .....ucucucugacaaaagggugagugcucacC.....                                                                            |     | 1     | 1  | S01    |
| .....gugagugcucacauaggucaggaC.....                                                                                 |     | 1     | 1  | S01    |
| .....ugagugcucacauaggucaggaugccaAc.....                                                                            |     | 1     | 1  | S01    |
| .....gagugcucacauaggucaggaA.....                                                                                   |     | 1     | 1  | S01    |
| .....augccagcgAagaaagagcua.....                                                                                    |     | 1     | 1  | S01    |
| .....aggguugucggguagaagagaucg.....                                                                                 |     | 1     | 0  | S01    |
| .....ggugucggguagaagagauc.....                                                                                     |     | 1     | 0  | S01    |
| .....ggugucggguagaagagaucgaCc.....                                                                                 |     | 1     | 1  | S01    |
| .....ugucggguagaagagaucgaC.....                                                                                    |     | 1     | 1  | S01    |
| .....aggcuucucucugacaaaaggggu.....                                                                                 |     | 2     | 0  | S02    |
| .....gacaaaaggAagagugcucac.....                                                                                    |     | 1     | 1  | S02    |
| .....ucaggaugccagcgAagaaagagcua.....                                                                               |     | 1     | 1  | S02    |
| .....ggugucggguagaagagaucgaCc.....                                                                                 |     | 2     | 1  | S02    |

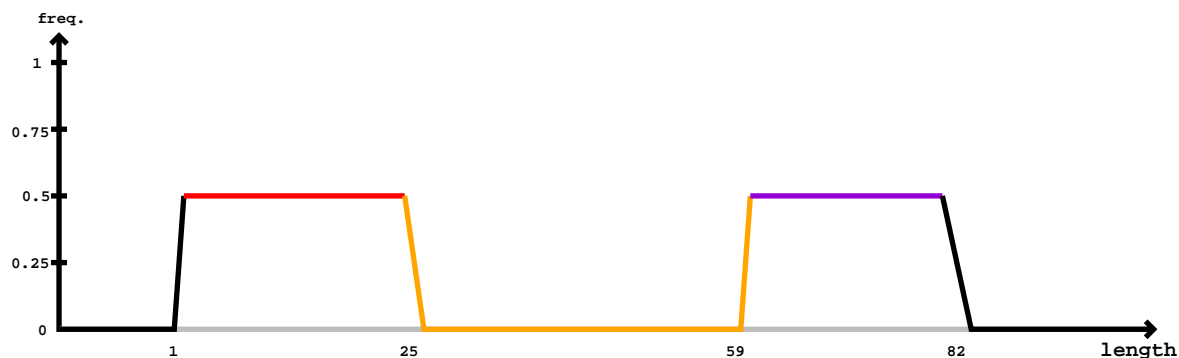

Star

[illegible]

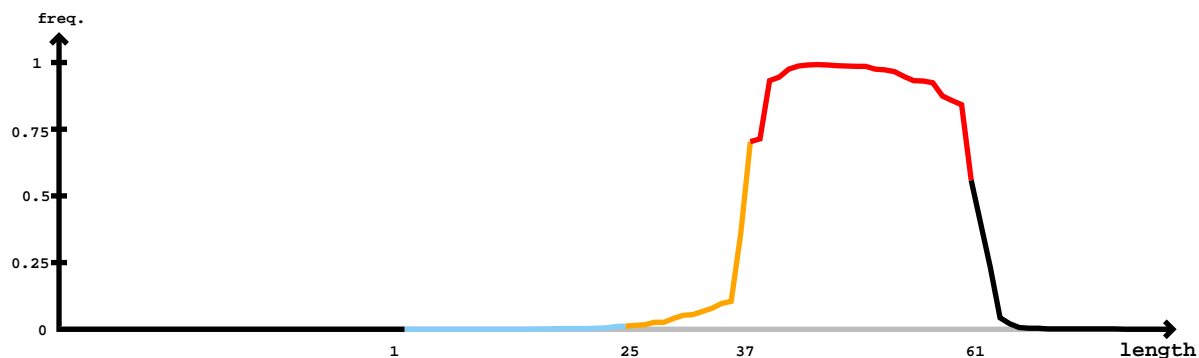

## Mature

[illegible]

## Star

## Mature

uacagauugucuuccucuaaaaauaagggccaguuugggcaugcuuucccaguguuuuuuggggccaaaaagugaauuccggaccaaugacaagguuuuugguaagauuguagaga

|                                        |    |   |     |
|----------------------------------------|----|---|-----|
| .....agugaauuccggaccaaugacaGgg.....    | 9  | 1 | S01 |
| .....Ggugaauuccggaccaaugacaagg.....    | 1  | 1 | S01 |
| .....agugaauuccggaccaaugacaaggu.....   | 1  | 0 | S01 |
| .....gugaauuccggaccaaugaca.....        | 8  | 0 | S01 |
| .....gugaauuccggaccaaugacaa.....       | 3  | 0 | S01 |
| .....gugaauuccggaccaaugacaaA.....      | 1  | 1 | S01 |
| .....gugaauuccggaccaaugacaGgg.....     | 2  | 1 | S01 |
| .....gugaauuccggaccaaugacaagg.....     | 7  | 0 | S01 |
| .....gugauCccggaccaaugacaaggu.....     | 1  | 1 | S01 |
| .....gugaauuccggaccaaugacaGggu.....    | 3  | 1 | S01 |
| .....gugaauuccggaccaaugacaaggu.....    | 79 | 0 | S01 |
| .....gugaauuccggaccaaugacaaggA.....    | 2  | 1 | S01 |
| .....gugaauuccUgaccaaugacaaggu.....    | 1  | 1 | S01 |
| .....gGgaauuccggaccaaugacaaggu.....    | 1  | 1 | S01 |
| .....gugaauuccggaccaaugacaaggG.....    | 3  | 1 | S01 |
| .....gugaauuccggaccaAagacaaggu.....    | 1  | 1 | S01 |
| .....gCgaauuccggaccaaugacaaggu.....    | 1  | 1 | S01 |
| .....gugaauuccggaccaaugacaaggC.....    | 11 | 1 | S01 |
| .....gugaCuccggaccaaugacaaggu.....     | 1  | 1 | S01 |
| .....gugaauuccggaccaauAacaaggu.....    | 1  | 1 | S01 |
| .....ugaauuccAgaccaaugacaaggu.....     | 1  | 1 | S01 |
| .....ugaauuccggaccaaugacaaggug.....    | 1  | 0 | S01 |
| .....gaauuccggaccaaugacaG.....         | 1  | 1 | S01 |
| .....gaauuccggaccaaugacaGg.....        | 1  | 1 | S01 |
| .....gaauuccggaccaaugacaagg.....       | 3  | 0 | S01 |
| .....gauCccggaccaaugacaaggu.....       | 1  | 1 | S01 |
| .....gaauuccggaccaaugacaGggu.....      | 1  | 1 | S01 |
| .....gaauuccggaccaaugacaaggu.....      | 1  | 0 | S01 |
| .....gaauuccggaccaaugacaaggug.....     | 4  | 0 | S01 |
| .....gauCccggaccaaugacaaggug.....      | 1  | 1 | S01 |
| .....gauCccggaccaaugacaaggugu.....     | 4  | 1 | S01 |
| .....gauuccggaccaaugacaaggugC.....     | 2  | 1 | S01 |
| .....gaauuccggaccaaugaaAaggugu.....    | 1  | 1 | S01 |
| .....gaauuccggaccaGugacaaggugu.....    | 1  | 1 | S01 |
| .....gaauuccggaccaaugacaGggugu.....    | 2  | 1 | S01 |
| .....gaauuccggaccaaugacaaggugu.....    | 26 | 0 | S01 |
| .....gaauuccggaccaAagacaaggugu.....    | 1  | 1 | S01 |
| .....gauCccggaccaaugacaagguguu.....    | 1  | 1 | S01 |
| .....gaauuccggaccaaugacaGgguguu.....   | 1  | 1 | S01 |
| .....auuccggaccaaugacaaggu.....        | 1  | 0 | S01 |
| .....auuccggaccaaugacaaggugu.....      | 1  | 0 | S01 |
| .....auuccggaccaaugacaGgguguu.....     | 1  | 1 | S01 |
| .....auCccggaccaaugacaagguguu.....     | 1  | 1 | S01 |
| .....uuccggaccaaugacaaggug.....        | 1  | 0 | S01 |
| .....uCccggaccaaugacaaggug.....        | 1  | 1 | S01 |
| .....uuccggaccaaugacaagguguu.....      | 3  | 0 | S01 |
| .....uuccggaccaaugacaGgguguu.....      | 2  | 1 | S01 |
| .....Cccggaccaaugacaagg.....           | 2  | 1 | S01 |
| .....uccggaccaaugacaaggu.....          | 1  | 0 | S01 |
| .....Cccggaccaaugacaagguguuug.....     | 1  | 1 | S01 |
| .....uccggaccaaugacaagguguuug.....     | 1  | 0 | S01 |
| .....ccggaccaaugacaaggu.....           | 1  | 0 | S01 |
| .....ccggaccaaugacaGggug.....          | 1  | 1 | S01 |
| .....ccggaUcaaugacaaggug.....          | 1  | 1 | S01 |
| .....ugacaagguguuuuguaagauugC.....     | 1  | 1 | S01 |
| .....aguuguuuuugggccaaaaguga.....      | 1  | 0 | S02 |
| .....Cuuuugggccaaaagugaauuccg.....     | 1  | 1 | S02 |
| .....uuuugggccAaaaagugau.....          | 1  | 1 | S02 |
| .....uuuugggAccaaaagugauu.....         | 1  | 1 | S02 |
| .....uuuugggccaaaagugaauuccA.....      | 1  | 1 | S02 |
| .....uuuuAgggccaaaagugaauuccgg.....    | 1  | 1 | S02 |
| .....uggggccaaaagugaauuccggacc.....    | 1  | 0 | S02 |
| .....Gggggccaaaagugaauuccggacc.....    | 2  | 1 | S02 |
| .....ggggccaaaagugaauuccgga.....       | 1  | 0 | S02 |
| .....ggggccaaaagugaauuccgAacc.....     | 1  | 1 | S02 |
| .....gggAccaaaagugaauuccggacca.....    | 1  | 1 | S02 |
| .....gggAccaaaagugaauuccggaccaaug..... | 1  | 1 | S02 |
| .....gAccaaaagugaauuccggacc.....       | 1  | 1 | S02 |
| .....gAccaaaagugaauuccggaccaau.....    | 6  | 1 | S02 |

## Star

## Mature

uacagauugucuuccucuuaaaauuagggccaguuuggcaugcuuucccaguuuguuuuuuggggccaaaagugauuccggaccaaugacaagguuuuugguaagauuguagaga

|                                     |    |   |     |
|-------------------------------------|----|---|-----|
| .....Accaaaagugauuccggaccaaug.....  | 5  | 1 | S02 |
| .....ccaaaagugauuccggaccaag.....    | 1  | 1 | S02 |
| .....caaaagugauuUcggacca.....       | 1  | 1 | S02 |
| .....caaaagugauuccggaccaag.....     | 2  | 1 | S02 |
| .....caaaagugauuccggaccaaugac.....  | 1  | 0 | S02 |
| .....caaaagugauCccggaccaaugaca..... | 1  | 1 | S02 |
| .....aaaagugauuccggaccaagAc.....    | 1  | 1 | S02 |
| .....aaaagugauuccggaccaaugaca.....  | 1  | 0 | S02 |
| .....aaaagugauuccggaccaagAcaca..... | 3  | 1 | S02 |
| .....aaagugauuccggaccaC.....        | 1  | 1 | S02 |
| .....aaagugauuccggaccaA.....        | 1  | 1 | S02 |
| .....aaagugauuccggaccaagAc.....     | 1  | 1 | S02 |
| .....aaagugauuccggaccaaugac.....    | 1  | 0 | S02 |
| .....aaagugauuccggaccaaugaca.....   | 3  | 0 | S02 |
| .....aaagugauuccggaccaugacaCg.....  | 1  | 1 | S02 |
| .....aagugauCccggaccaaugaca.....    | 1  | 1 | S02 |
| .....aagugauuccggaccaugacaGg.....   | 1  | 1 | S02 |
| .....aagugauuccggaccaaugacaag.....  | 2  | 0 | S02 |
| .....agugauuccggaccaaugaca.....     | 1  | 0 | S02 |
| .....agugauuccggaccaugacaG.....     | 3  | 1 | S02 |
| .....agugauuccggaccaugacaCg.....    | 1  | 1 | S02 |
| .....agugauuccggaccaugacaGg.....    | 1  | 1 | S02 |
| .....Ggugauuccggaccaugacaagg.....   | 2  | 1 | S02 |
| .....agugauCccggaccaugacaagg.....   | 12 | 1 | S02 |
| .....aguAauuccggaccaugacaagg.....   | 1  | 1 | S02 |
| .....agugauuccggaccaugacaagg.....   | 60 | 0 | S02 |
| .....agugauuccggaccaugacaagA.....   | 5  | 1 | S02 |
| .....agugauuccggaccaGugacaagg.....  | 1  | 1 | S02 |
| .....agugauuccggaccaugacaGgg.....   | 12 | 1 | S02 |
| .....agugUuuccggaccaugacaagg.....   | 1  | 1 | S02 |
| .....agugauuccggaccaugacaagCg.....  | 2  | 1 | S02 |
| .....agugauuccggaccaagAcagg.....    | 3  | 1 | S02 |
| .....gugauuccggaccaugaca.....       | 7  | 0 | S02 |
| .....gugauuccggaccaugaGa.....       | 1  | 1 | S02 |
| .....gugauuccggaccaagAcaca.....     | 1  | 1 | S02 |
| .....gugauuccggaUcaaugaca.....      | 1  | 1 | S02 |
| .....gugauuccggaccaaugacG.....      | 1  | 1 | S02 |
| .....gugauuccggaccaugacaa.....      | 4  | 0 | S02 |
| .....gugauuccggaccaugacaag.....     | 2  | 0 | S02 |
| .....gugauuccggaccaugacaGg.....     | 1  | 1 | S02 |
| .....gugauuccggaccaagAcagg.....     | 2  | 1 | S02 |
| .....gugauuccggaccaugacaagg.....    | 5  | 0 | S02 |
| .....gugauuccggaccaugacaaggC.....   | 10 | 1 | S02 |
| .....gugauuccggaccaugacaaggu.....   | 80 | 0 | S02 |
| .....gugauuccggaccaugacaaggA.....   | 2  | 1 | S02 |
| .....gugauuccgAaccaugacaaggu.....   | 1  | 1 | S02 |
| .....gugauuccggGccaugacaaggu.....   | 1  | 1 | S02 |
| .....gugauuccggaccaugacaGggu.....   | 3  | 1 | S02 |
| .....gugauuccggaccaagAcaggu.....    | 5  | 1 | S02 |
| .....gugauuccGgaccaugacaaggu.....   | 1  | 1 | S02 |
| .....gugauuccggaccaugacaaggG.....   | 6  | 1 | S02 |
| .....gugauuccggaccaugGcaaggu.....   | 1  | 1 | S02 |
| .....gugauuccggaccaugacaagguA.....  | 1  | 1 | S02 |
| .....gugauuccggaccaugacaaggugu..... | 1  | 0 | S02 |
| .....uguauuccggaccaugacaagg.....    | 1  | 0 | S02 |
| .....uguauuccggaccaugacaaggC.....   | 1  | 1 | S02 |
| .....uguauuccggaccaugacaaggu.....   | 4  | 0 | S02 |
| .....gauuccggaccaugacaGg.....       | 1  | 1 | S02 |
| .....gauuccggaccaugacaGgg.....      | 1  | 1 | S02 |
| .....gauuccggaccaagAcagg.....       | 1  | 1 | S02 |
| .....gauuccggaccaugacaagg.....      | 4  | 0 | S02 |
| .....gauuccggaccaugacaGggu.....     | 1  | 1 | S02 |
| .....gauuccggaccaugacaaggu.....     | 2  | 0 | S02 |
| .....gauuccggaccaugacaaggC.....     | 1  | 1 | S02 |
| .....gauuccggaccaugacaaggug.....    | 3  | 0 | S02 |
| .....gauuccggaccaugacaaggGgu.....   | 1  | 1 | S02 |
| .....Aauuccggaccaugacaaggugu.....   | 2  | 1 | S02 |
| .....gauuccggaccaugacaaggugG.....   | 3  | 1 | S02 |
| .....gauuccggaccaugacaaggugu.....   | 70 | 0 | S02 |

## Star

## Mature

|                                                                                                                  |    |   |     |
|------------------------------------------------------------------------------------------------------------------|----|---|-----|
| uacagauugucuuccucuuaaaauuaggcccaguuuggcaugcuuucccaguguuuuuggggccaaaagugauuccggaccaaugacaaggguuuugguaagauuguagaga |    |   |     |
| .....gauuccggacUaaugacaaggugu.....                                                                               | 1  | 1 | S02 |
| .....gauuccggaccaGugacaaggugu.....                                                                               | 1  | 1 | S02 |
| .....gauuccggaccaaugacaaggugC.....                                                                               | 4  | 1 | S02 |
| .....gauuccggaccaaugacaGggugu.....                                                                               | 14 | 1 | S02 |
| .....gauuccggaccaUugacaaggugu.....                                                                               | 1  | 1 | S02 |
| .....gauuccggaccaAAgacaaggugu.....                                                                               | 2  | 1 | S02 |
| .....gauuccggaccaaugacaCggugu.....                                                                               | 1  | 1 | S02 |
| .....Uauuccggaccaaugacaaggugu.....                                                                               | 1  | 1 | S02 |
| .....gauuccggaccaaugacaaggugu.....                                                                               | 1  | 0 | S02 |
| .....auuccggaccaaugacaGggugu.....                                                                                | 1  | 1 | S02 |
| .....auuccggaccaaugacaagguguC.....                                                                               | 1  | 1 | S02 |
| .....auuccggaccaaugacaagguguu.....                                                                               | 3  | 0 | S02 |
| .....auuccggaccaAAgacaagguguu.....                                                                               | 1  | 1 | S02 |
| .....uuccggaccaaugacaagg.....                                                                                    | 2  | 0 | S02 |
| .....uuccggaccaaugacaaggug.....                                                                                  | 2  | 0 | S02 |
| .....uuccggaccaaugacaaggugu.....                                                                                 | 2  | 0 | S02 |
| .....uuccggaccaaugacaagguguu.....                                                                                | 1  | 0 | S02 |
| .....uuccggaccaaugacaGgguguu.....                                                                                | 2  | 1 | S02 |
| .....uCCcggaaccaaugacaagguguu.....                                                                               | 3  | 1 | S02 |
| .....uuccggaccaaugacaGgguguuu.....                                                                               | 2  | 1 | S02 |
| .....uuccggaccaaugacaaggAguuu.....                                                                               | 1  | 1 | S02 |
| .....uuccggaccaaugacaagguguuu.....                                                                               | 2  | 0 | S02 |
| .....uccggaccaaugacaagg.....                                                                                     | 1  | 0 | S02 |
| .....uccggaccaaugacaaggu.....                                                                                    | 1  | 0 | S02 |
| .....uccggaccaaugacaaggug.....                                                                                   | 1  | 0 | S02 |
| .....uccggaccaaugacaaggugu.....                                                                                  | 1  | 0 | S02 |
| .....Cccggaccaaugacaagguguuu.....                                                                                | 1  | 1 | S02 |
| .....ccggaccaaugacaaggug.....                                                                                    | 1  | 0 | S02 |
| .....ccggaccaaugacaagguguuuggu.....                                                                              | 1  | 0 | S02 |
| .....cggaccaaugacaagguguuuggu.....                                                                               | 1  | 0 | S02 |



Provisional ID : Maple\_Unigene\_BMK.23022\_69686  
Score total : 2.5  
Score for star read(s) : 3.9  
Score for read counts : -4.9  
Score for mfe : 0.5  
Score for randfold : 0  
Score for cons. seed : 3  
Total read count : 2  
Mature read count : 1  
Loop read count : 0  
Star read count : 1

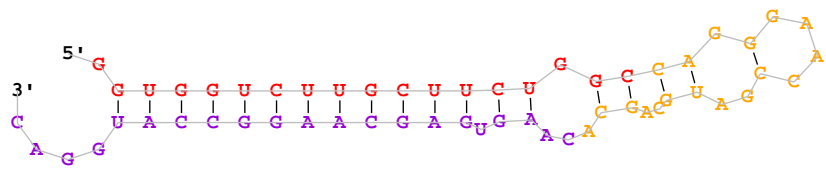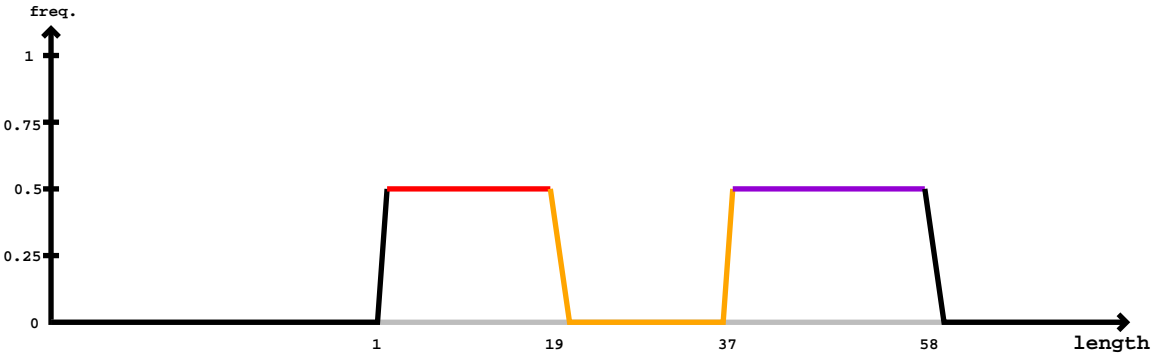

| Mature |                                                                                              |  |  |  |  |  |  |  |  | Star |  |  |  |  |  |  |  |  |  |  |                       |  |  |  |  |  |  |  |  |  |  |  |  |  |  |  |  |  |  |  |               |  |  |  |  |  |  |  |  |  |  |  |  |  |  |  |  |  |  |  |          |  |  |  |  |  |  |  |  |  |  |  |  |  |  |  |  |  |  |  |                   |  |  |  |  |  |  |  |  |  |  |  |  |  |  |  |  |  |  |  |       |  |  |  |  |  |  |  |  |  |  |  |  |  |  |  |  |  |  |  |                  |  |  |  |  |  |  |  |  |  |  |  |  |  |  |  |  |  |  |  |       |  |  |  |  |  |  |  |  |  |  |  |  |  |  |  |  |  |  |  |     |     |  |  |  |  |  |  |  |  |  |  |  |  |  |  |  |  |  |  |  |  |  |  |  |  |  |  |  |  |  |  |  |  |  |  |  |  |  |  |  |  |  |  |  |  |  |  |  |  |  |  |  |  |  |  |  |  |  |  |  |  |  |  |  |  |  |  |  |  |  |  |  |  |  |  |  |  |  |  |  |  |  |  |  |  |  |  |  |  |  |  |  |  |  |  |  |  |  |  |  |  |  |  |  |  |  |  |  |  |  |  |  |  |  |  |  |  |  |  |  |  |  |  |  |  |  |  |  |  |  |  |  |  |  |  |  |  |  |  |  |  |  |  |  |  |  |  |  |  |  |  |  |  |  |  |  |  |  |  |  |  |  |  |  |  |  |  |  |  |  |  |  |  |  |  |  |  |  |  |  |  |  |  |  |  |  |  |  |  |  |  |  |  |  |  |  |  |  |  |  |  |  |  |  |  |  |  |  |  |  |  |  |  |  |  |  |  |  |  |  |  |  |  |  |  |  |  |  |  |  |  |  |  |  |  |  |  |  |  |  |  |  |  |  |  |  |  |  |  |  |  |  |  |  |  |  |  |  |  |  |  |  |  |  |  |  |  |  |  |  |  |  |  |  |  |  |  |  |  |  |  |  |  |  |  |  |  |  |  |  |  |  |  |  |  |  |  |  |  |  |  |  |  |  |  |  |  |  |  |  |  |  |  |  |  |  |  |  |  |  |  |  |  |  |  |  |  |  |  |  |  |  |  |  |  |  |  |  |  |  |  |  |  |  |  |  |  |  |  |  |  |  |  |  |  |  |  |  |  |  |  |  |  |  |  |  |  |  |  |  |  |  |  |  |  |  |  |  |  |  |  |  |  |  |  |  |  |  |  |  |  |  |  |  |  |  |  |  |  |  |  |  |  |  |  |  |  |  |  |  |  |  |  |  |  |  |  |  |  |  |  |  |  |  |  |  |  |  |  |  |  |  |  |  |  |  |  |  |  |  |  |  |  |  |  |  |  |  |  |  |  |  |  |  |  |  |  |  |  |  |  |  |  |  |  |  |  |  |  |  |  |  |  |  |  |  |  |  |  |  |  |  |  |  |  |  |  |  |  |  |  |  |  |  |  |  |  |  |  |  |  |  |  |  |  |  |  |  |  |  |  |  |  |  |  |  |  |  |  |  |  |  |  |  |  |  |  |  |  |  |  |  |  |  |  |  |  |  |  |  |  |  |  |  |  |  |  |  |  |  |  |  |  |  |  |  |  |  |  |  |  |  |  |  |  |  |  |  |  |  |  |  |  |  |  |  |  |  |  |  |  |  |  |  |  |  |  |  |  |  |  |  |  |  |  |  |  |  |  |  |  |  |  |  |  |  |  |  |  |  |  |  |  |  |  |  |  |  |  |  |  |  |  |  |  |  |  |  |  |  |  |  |  |  |  |  |  |  |  |  |  |  |  |  |  |  |  |  |  |  |  |  |  |  |  |  |  |  |  |  |  |  |  |  |  |  |  |  |  |  |  |  |  |  |  |  |  |  |  |  |  |  |  |  |  |  |  |  |  |  |  |  |  |  |  |  |  |  |  |  |  |  |  |  |  |  |  |  |  |  |  |  |  |  |  |  |  |  |  |  |  |  |  |  |  |  |  |  |  |  |  |  |  |  |  |  |  |  |  |  |  |  |  |  |  |  |  |  |  |  |  |  |  |  |  |  |  |  |  |  |  |  |  |  |  |  |  |  |  |  |  |  |  |  |  |  |  |  |  |  |  |  |  |  |  |  |  |  |  |  |  |  |  |  |  |  |  |  |  |  |  |  |  |  |  |  |  |  |  |  |  |  |  |  |  |  |  |  |  |  |  |  |  |  |  |  |  |  |  |  |  |  |  |  |  |  |  |  |  |  |  |  |  |  |  |  |  |  |  |  |  |  |  |  |  |  |  |  |  |  |  |  |  |  |  |  |  |  |  |  |  |  |  |  |  |  |  |  |  |  |  |  |  |  |  |  |  |  |  |  |  |  |  |  |  |  |  |  |  |  |  |  |  |  |  |  |  |  |  |  |  |  |  |  |  |  |  |  |  |  |  |  |  |  |  |  |  |  |  |  |  |  |  |  |  |  |  |  |  |  |  |  |  |  |  |  |  |  |  |  |  |  |  |  |  |  |  |  |  |  |  |  |  |  |  |  |  |  |  |  |  |  |  |  |  |  |  |  |  |  |  |  |  |  |  |  |  |  |  |  |  |  |  |  |  |  |  |  |  |  |  |  |  |  |  |  |  |  |  |  |  |  |  |  |  |  |  |  |  |  |  |  |  |  |  |  |  |  |  |  |  |  |  |  |  |  |  |  |  |  |  |  |  |  |  |  |  |  |  |  |  |  |  |  |  |  |  |  |  |  |  |  |  |  |  |  |  |  |  |  |  |  |  |  |  |  |  |  |  |  |  |  |  |  |  |  |  |  |  |  |  |  |  |  |  |  |  |  |  |  |  |  |  |  |  |  |  |  |  |  |  |  |  |  |  |  |  |  |  |  |  |  |  |  |  |  |  |  |  |  |  |  |  |  |  |  |  |  |  |  |  |  |  |  |  |  |  |  |  |  |  |  |  |  |  |  |  |  |  |  |  |  |  |  |  |  |  |  |  |  |  |  |  |  |  |  |  |  |  |  |  |  |  |  |  |  |  |  |  |  |  |  |  |  |  |  |  |  |  |  |  |  |  |  |  |  |  |  |  |  |  |  |  |  |  |  |  |  |  |  |  |  |  |  |  |  |  |  |  |  |  |  |  |  |  |  |  |  |  |  |  |  |  |  |  |  |  |  |  |  |  |  |  |  |  |  |  |  |  |  |  |  |  |  |  |  |  |  |  |  |  |  |  |  |  |  |  |  |  |  |  |  |  |  |  |  |  |  |  |  |  |  |  |  |  |  |  |  |  |  |  |  |  |  |  |  |  |  |  |  |  |  |  |  |  |  |  |  |  |  |  |  |  |  |  |  |  |  |  |  |  |  |  |  |  |  |  |  |  |  |  |  |  |  |  |  |  |  |  |  |  |  |  |  |  |  |  |  |  |  |  |  |  |  |  |  |  |  |  |  |  |  |  |  |  |  |  |  |  |  |  |  |  |  |  |  |  |  |  |  |  |  |  |  |  |  |  |  |  |  |  |  |  |  |  |  |  |  |  |  |  |  |  |  |  |  |  |  |  |  |  |  |  |  |  |  |  |  |  |  |  |  |  |  |  |  |  |  |  |  |  |  |  |  |  |  |  |  |  |  |  |  |  |  |  |  |  |  |  |  |  |  |  |  |  |  |  |  |  |  |  |  |  |  |  |  |  |  |  |  |  |  |  |  |  |  |  |  |  |  |  |  |  |  |  |  |  |  |  |  |  |  |  |  |  |  |  |  |  |  |  |  |  |  |  |  |  |  |  |  |  |  |  |  |  |  |  |  |  |  |  |  |  |  |  |  |  |  |  |  |  |  |  |  |  |  |  |  |  |  |  |  |  |  |  |  |  |  |  |  |  |  |  |  |  |  |  |  |  |  |  |  |  |  |  |  |  |  |  |  |  |  |  |  |  |  |  |  |  |  |  |  |  |  |  |  |  |  |  |  |  |  |  |  |  |  |  |  |  |  |  |  |  |  |  |  |  |  |  |  |  |  |  |  |  |  |  |  |  |  |  |  |  |  |  |  |  |  |  |  |  |  |  |  |  |  |  |  |  |  |  |  |  |  |  |  |  |  |  |  |  |  |  |  |  |  |  |  |  |  |  |  |  |  |  |  |  |  |  |  |  |  |  |  |  |  |  |  |  |  |  |  |  |  |  |  |  |  |  |  |  |  |  |  |  |  |  |  |  |  |  |  |  |  |  |  |  |  |  |  |  |  |  |  |  |  |  |  |  |  |  |  |  |  |  |  |  |  |  |  |  |  |  |  |  |  |  |  |  |  |  |  |  |  |  |  |  |  |  |  |  |  |  |  |  |  |  |  |  |  |  |  |  |  |  |  |  |  |  |  |  |  |  |  |  |  |  |  |  |  |  |  |  |  |  |  |  |  |  |  |  |  |  |  |  |  |  |  |  |  |  |  |  |  |  |  |  |  |  |  |  |  |  |  |  |  |  |  |  |  |  |  |  |  |  |  |  |  |  |  |  |  |  |  |  |  |  |  |  |  |  |  |  |  |  |  |  |  |  |  |  |  |  |  |  |  |  |  |  |  |  |  |  |  |  |  |  |  |  |  |  |  |  |  |  |  |  |  |  |  |  |  |  |  |  |  |  |  |  |  |  |  |  |  |  |  |  |  |  |  |  |  |  |  |  |  |  |  |  |  |  |  |  |  |  |  |  |  |  |  |  |  |  |  |  |  |  |  |  |  |  |  |  |  |  |  |  |  |  |  |  |  |  |  |  |  |  |  |  |  |  |  |  |  |  |  |  |  |  |  |  |  |  |  |  |  |  |  |  |  |  |  |  |  |  |  |  |  |  |  |  |  |  |  |  |  |  |  |  |  |  |  |  |  |  |  |  |  |  |  |  |  |  |  |  |  |  |  |  |  |  |  |  |  |  |  |  |  |  |  |  |  |  |  |  |  |  |  |  |  |  |  |  |  |  |  |  |  |  |  |  |  |  |  |  |  |  |  |  |  |  |  |  |  |  |  |  |  |  |  |  |  |  |  |  |  |  |  |  |  |  |  |  |  |  |  |  |  |  |  |  |  |  |  |  |  |  |  |  |  |  |  |  |  |  |  |  |  |  |  |  |  |  |  |  |  |  |  |  |  |  |  |  |  |  |  |  |  |  |  |  |  |  |  |  |  |  |  |  |  |  |  |  |  |  |  |  |  |  |  |  |  |  |  |  |  |  |  |  |  |  |  |  |  |  |  |  |  |  |  |  |  |  |  |  |  |  |  |  |  |  |  |  |  |  |  |  |  |  |  |  |  |  |  |  |  |  |  |  |  |  |  |  |  |  |  |  |  |  |  |  |  |  |  |  |  |  |  |  |  |  |  |  |  |  |  |  |  |  |  |  |  |  |  |  |  |  |  |  |  |  |  |  |  |  |  |  |  |  |  |  |  |  |  |  |  |  |  |  |  |  |  |  |  |  |  |  |  |  |  |  |  |  |  |  |  |  |  |  |  |  |  |  |  |  |  |  |  |  |  |  |  |  |  |  |  |  |  |  |  |  |  |  |  |  |  |  |  |  |  |  |  |  |  |  |  |  |  |  |  |  |  |  |  |  |  |  |  |  |  |  |  |  |  |  |  |  |  |  |  |  |  |  |  |  |  |  |  |  |  |  |  |  |  |  |  |  |  |  |  |  |  |  |  |  |  |  |  |  |  |  |  |  |  |  |  |  |  |  |  |  |  |  |  |  |  |  |  |  |  |  |  |  |  |  |  |  |  |  |  |  |  |  |  |  |  |  |  |  |  |  |  |  |  |  |  |  |  |  |  |  |  |  |  |  |  |  |  |  |  |  |  |  |  |  |  |  |  |  |  |  |  |  |  |  |  |  |  |  |  |  |  |  |  |  |  |  |  |  |  |  |  |  |  |  |  |  |  |  |  |  |  |  |  |  |  |  |  |  |  |  |  |  |  |  |  |  |  |  |  |  |  |  |  |  |  |  |  |  |  |  |  |  |  |  |  |  |  |  |  |  |  |  |  |  |  |  |  |  |  |  |  |  |  |  |  |  |  |  |  |  |  |  |  |  |  |  |  |  |  |  |  |  |  |  |  |  |  |  |  |  |  |  |  |  |  |  |  |  |  |  |  |  |  |  |  |  |  |  |  |  |  |  |  |  |  |  |  |  |  |  |  |  |  |  |  |  |  |  |  |  |  |  |  |  |  |  |  |  |  |  |  |  |  |  |  |  |  |  |  |  |  |  |  |  |  |  |  |  |  |  |  |  |  |  |  |  |  |  |  |  |  |  |  |  |  |  |  |  |  |  |  |  |  |  |  |  |  |  |  |  |  |  |  |  |  |  |  |  |  |  |  |  |  |  |  |  |  |  |  |  |  |  |  |  |  |  |  |  |  |  |  |  |  |  |  |  |  |  |  |  |  |  |  |  |  |  |  |  |  |  |  |  |  |  |  |  |  |  |  |  |  |  |  |  |  |  |  |  |  |  |  |  |  |  |  |  |  |  |  |  |  |  |  |  |  |  |  |  |  |  |  |  |  |  |  |  |  |  |  |  |  |  |  |  |  |  |  |  |  |  |  |  |  |  |  |  |  |  |  |  |  |  |  |  |  |  |  |  |  |  |  |  |  |  |  |  |  |  |  |  |  |  |  |  |  |  |  |  |  |  |  |  |  |  |  |  |  |  |  |  |  |  |  |  |  |  |  |  |  |  |  |  |  |  |  |  |  |  |  |  |  |  |  |  |  |  |  |  |  |  |  |  |  |  |  |  |  |  |  |  |  |  |  |  |  |  |  |  |  |  |  |  |  |  |  |  |  |  |  |  |  |  |  |  |  |  |  |  |  |  |  |  |  |  |  |  |  |  |  |  |  |  |  |  |  |  |  |  |  |  |  |  |  |  |  |  |  |  |  |  |  |  |  |  |  |  |  |  |  |  |  |  |  |  |  |  |  |  |  |  |  |  |  |  |  |  |  |  |  |  |  |  |  |  |  |  |  |  |  |  |  |  |  |  |  |  |  |  |  |  |  |  |  |  |  |  |  |  |  |  |  |  |  |  |  |  |  |  |  |  |  |  |  |  |  |  |  |  |  |  |  |  |  |  |  |  |  |  |  |  |  |  |  |  |  |  |  |  |  |  |  |  |  |  |  |  |  |  |  |  |  |  |  |  |  |  |  |  |  |  |  |  |  |  |  |  |  |  |  |  |  |  |  |  |  |  |  |  |  |  |  |  |  |  |  |  |  |  |  |  |  |  |  |  |  |  |  |  |  |  |  |  |  |  |  |  |  |  |  |  |  |  |  |  |  |  |  |  |  |  |  |  |  |  |  |  |  |  |  |  |  |  |  |  |  |  |  |  |  |  |  |  |  |  |  |  |  |  |  |  |  |  |  |  |  |  |  |  |  |  |  |  |  |  |  |  |  |  |  |  |  |  |  |  |  |  |  |  |  |  |  |  |  |  |  |  |  |  |  |  |  |  |  |  |  |  |  |  |  |  |  |  |  |  |  |  |  |  |  |  |  |  |  |  |  |  |  |  |  |  |  |  |  |  |  |  |  |  |  |  |  |  |  |  |  |  |  |  |  |  |  |  |  |  |  |  |  |  |  |  |  |  |  |  |  |  |  |  |  |  |  |  |  |  |  |  |  |  |  |  |  |  |  |  |  |  |  |  |  |  |  |  |  |  |  |  |  |  |  |  |  |  |  |  |  |  |  |  |  |  |  |  |  |  |  |  |  |  |  |  |  |  |  |  |  |  |  |  |  |  |  |  |  |  |  |  |  |  |  |  |  |  |  |  |  |  |  |  |  |  |  |  |  |  |  |  |  |  |  |  |  |  |  |  |  |  |  |  |  |  |  |  |  |  |  |  |  |  |  |  |  |  |  |  |  |  |  |  |  |  |  |  |  |  |  |  |  |  |  |  |  |  |  |  |  |  |  |  |  |  |  |  |  |  |  |  |  |  |  |  |  |  |  |  |  |  |  |  |  |  |  |  |  |  |  |  |  |  |  |  |  |  |  |  |  |  |  |  |  |  |  |  |  |  |  |  |  |  |  |  |  |  |  |  |  |  |  |  |  |  |  |  |  |  |  |  |  |  |  |  |  |  |  |  |  |  |  |  |  |  |  |  |  |  |  |  |  |  |  |  |  |  |  |  |  |  |  |  |  |  |  |  |  |  |  |  |  |  |  |  |  |  |  |  |  |  |  |  |  |  |  |  |  |  |  |  |  |  |  |  |  |  |  |  |  |  |  |  |  |  |  |  |  |  |  |  |  |  |  |  |  |  |  |  |  |  |  |  |  |  |  |  |  |  |  |  |  |  |  |  |  |  |  |  |  |  |  |  |  |  |  |  |  |  |  |  |  |  |  |  |  |  |  |  |  |  |  |  |  |  |  |  |  |  |  |  |  |  |  |  |  |  |  |  |  |  |  |  |  |  |  |  |  |  |  |  |  |  |  |  |  |  |  |  |  |  |  |  |  |  |  |  |  |  |  |  |  |  |  |  |  |  |  |  |  |  |  |  |  |  |  |  |  |  |  |  |  |  |  |  |  |  |  |  |  |  |  |  |  |  |  |  |  |  |  |  |  |  |  |  |  |  |  |  |  |  |  |  |  |  |  |  |  |  |  |  |  |  |  |  |  |  |  |  |  |  |  |  |  |  |  |  |  |  |  |  |  |  |  |  |  |  |  |  |  |  |  |  |  |  |  |  |  |  |  |  |  |  |  |  |  |  |  |  |  |  |  |  |  |  |  |  |  |  |  |  |  |  |  |  |  |  |  |  |  |  |  |  |  |  |  |  |  |  |  |  |  |  |  |  |  |  |  |  |  |  |  |  |  |  |  |  |  |  |  |  |  |  |  |  |  |  |  |  |  |  |  |  |  |  |  |  |  |  |  |  |  |  |  |  |  |  |  |  |  |  |  |  |  |  |  |  |  |  |  |  |  |  |  |  |  |  |  |  |  |  |  |  |  |  |  |  |  |  |  |  |  |  |  |  |  |  |  |  |  |  |  |  |  |  |  |  |  |  |  |  |  |  |  |  |  |  |  |  |  |  |  |  |  |  |  |  |  |  |  |  |  |  |  |  |  |  |  |  |  |  |  |  |  |  |  |  |  |  |  |  |  |  |  |  |  |  |  |  |  |  |  |  |  |  |  |  |  |  |  |  |  |  |  |  |  |  |  |  |  |  |  |  |  |  |  |  |  |  |  |  |  |  |  |  |  |  |  |  |  |  |  |  |  |  |  |  |  |  |  |  |  |  |  |  |  |  |  |  |  |  |  |  |  |  |  |  |  |  |  |  |  |  |  |  |  |  |  |  |  |  |  |  |  |  |  |  |  |  |  |  |  |  |  |  |  |  |  |  |  |  |  |  |  |  |  |  |  |  |  |  |  |  |  |  |  |  |  |  |  |  |  |  |  |  |  |  |  |  |  |  |  |  |  |  |  |  |  |  |  |  |  |  |  |  |  |  |  |  |  |  |  |  |  |  |  |  |  |  |  |  |  |  |  |  |  |  |  |  |  |  |  |  |  |  |  |  |  |  |  |  |  |  |  |  |  |  |  |  |  |  |  |  |  |  |  |  |  |  |  |  |  |  |  |  |  |  |  |  |  |  |  |  |  |  |  |  |  |  |  |  |  |  |  |  |  |  |  |  |  |  |  |  |  |  |  |  |  |  |  |  |  |  |  |  |  |  |  |  |  |  |  |  |  |  |  |  |  |  |  |  |  |  |  |  |  |  |  |  |  |  |  |  |  |  |  |  |  |  |  |  |  |  |  |  |  |  |  |  |  |  |  |  |  |  |  |  |  |  |  |  |  |  |  |  |  |  |  |  |  |  |  |  |  |  |  |  |  |  |  |  |  |  |  |  |  |  |  |  |  |  |  |  |  |  |  |  |  |  |  |  |  |  |  |  |  |  |  |  |  |  |  |  |  |  |  |  |  |  |  |  |  |  |  |  |  |  |  |  |  |  |  |  |  |  |  |  |  |  |  |  |  |  |  |  |  |  |  |  |  |  |  |  |  |  |  |  |  |  |  |  |  |  |  |  |  |  |  |  |  |  |  |  |  |  |  |  |  |  |  |  |  |  |  |  |  |  |  |  |  |  |  |  |  |  |  |  |  |  |  |  |  |  |  |  |  |  |  |  |  |  |  |  |  |  |  |  |  |  |  |  |  |  |  |  |  |  |  |  |  |  |  |  |  |  |  |  |  |  |  |  |  |  |  |  |  |  |  |  |  |  |  |  |  |  |  |  |  |  |  |  |  |  |  |  |  |  |  |  |  |  |  |  |  |  |  |  |  |  |  |  |  |  |  |  |  |  |  |  |  |  |  |  |  |  |  |  |  |  |  |  |  |  |  |  |  |  |  |  |  |  |  |  |  |  |  |  |  |  |  |  |  |  |  |  |  |  |  |  |  |  |  |  |  |  |  |  |  |  |  |  |  |  |  |  |  |  |  |  |  |  |  |  |  |  |  |  |  |  |  |  |  |  |  |  |  |  |  |  |  |  |  |  |  |  |  |  |  |  |  |  |  |  |  |  |  |  |  |  |  |  |  |  |  |  |  |  |  |  |  |  |  |  |  |  |  |  |  |  |  |  |  |  |  |  |  |  |  |  |  |  |  |  |  |  |  |  |  |  |  |  |  |  |  |  |  |  |  |  |  |  |  |  |  |  |  |  |  |  |  |  |  |  |  |  |  |  |  |  |  |  |  |  |  |  |  |  |  |  |  |  |  |  |  |  |  |  |  |  |  |  |  |  |  |  |  |  |  |  |  |  |  |  |  |  |  |  |  |  |  |  |  |  |  |  |  |  |  |  |  |  |  |  |  |  |  |  |  |  |  |  |  |  |  |  |  |  |  |  |  |  |  |  |  |  |  |  |  |  |  |  |  |  |  |  |  |  |  |  |  |  |  |  |  |  |  |  |  |  |  |  |  |  |  |  |  |  |  |  |  |  |  |  |  |  |  |  |  |  |  |  |  |  |  |  |  |  |  |  |  |  |  |  |  |  |  |  |  |  |  |  |  |  |  |  |  |  |  |  |  |  |  |  |  |  |  |  |  |  |  |  |  |  |  |  |  |  |  |  |  |  |  |  |  |  |  |  |  |  |  |  |  |  |  |  |  |  |  |  |  |  |  |  |  |  |  |  |  |  |  |  |  |  |  |  |  |  |  |  |  |  |  |  |  |  |  |  |  |  |  |  |  |  |  |  |  |  |  |  |  |  |  |  |  |  |  |  |  |  |  |  |  |  |  |  |  |  |  |  |  |  |  |  |  |  |  |  |  |  |  |  |  |  |  |  |  |  |  |  |  |  |  |  |  |  |  |  |  |  |  |  |  |  |  |  |  |  |  |  |  |  |  |  |  |  |  |  |  |  |  |  |  |  |  |  |  |  |  |  |  |  |  |  |  |  |  |  |  |  |  |  |  |  |  |  |  |  |  |  |  |  |  |  |  |  |  |  |  |  |  |  |  |  |  |  |  |  |  |  |  |  |  |  |  |  |  |  |  |  |  |  |  |  |  |  |  |  |  |  |  |  |  |  |  |  |  |  |  |  |  |  |  |  |  |  |  |  |  |  |  |  |  |  |  |  |  |  |  |  |  |  |  |  |  |  |  |  |  |  |  |  |  |  |  |  |  |  |  |  |  |  |  |  |  |  |  |  |  |  |  |  |  |  |  |  |  |  |  |  |  |  |  |  |  |  |  |  |  |  |  |  |  |  |  |  |  |  |  |  |  |  |  |  |  |  |  |  |  |  |  |  |  |  |  |  |  |  |  |  |  |  |  |  |  |  |  |  |  |  |  |  |  |  |  |  |  |  |  |  |  |  |  |  |  |  |  |  |  |  |  |  |  |  |  |  |  |  |  |  |  |  |  |  |  |  |  |  |  |  |  |  |  |  |  |  |  |  |  |  |  |  |  |  |  |  |  |  |  |  |  |  |  |  |  |  |  |  |  |  |  |  |  |  |  |  |  |  |  |  |  |  |  |  |  |  |  |  |  |  |  |  |  |  |  |  |  |  |  |  |  |  |  |  |  |  |  |  |  |  |  |  |  |  |  |  |  |  |  |  |  |  |  |  |  |  |  |  |  |  |  |  |  |  |  |  |  |  |  |  |  |  |  |  |  |  |  |  |  |  |  |  |  |  |  |  |  |  |  |  |  |  |  |  |  |  |  |  |  |  |  |  |  |  |  |  |  |  |  |  |  |  |  |  |  |  |  |  |  |  |  |  |  |  |  |  |  |  |  |  |  |  |  |  |  |  |  |  |  |  |  |  |  |  |  |  |  |  |  |  |  |  |  |  |  |  |  |  |  |  |  |  |  |  |  |  |  |  |  |  |  |  |  |  |  |  |  |  |  |  |  |  |  |  |  |  |  |  |  |  |  |  |  |  |  |  |  |  |  |  |  |  |  |  |  |  |  |  |  |  |  |  |  |  |  |  |  |  |  |  |  |  |  |  |  |  |  |  |  |  |  |  |  |  |  |  |  |  |  |  |  |  |  |  |  |  |  |  |  |  |  |  |  |  |  |  |  |  |  |  |  |  |  |  |  |  |  |  |  |  |  |  |  |  |  |  |  |  |  |  |  |  |  |  |  |  |  |  |  |  |  |  |  |  |  |  |  |  |  |  |  |  |  |  |  |  |  |  |  |  |  |  |  |  |  |  |  |  |  |  |  |  |  |  |  |  |  |  |  |  |  |  |  |  |  |  |  |  |  |  |  |  |  |  |  |  |  |  |  |  |  |  |  |  |  |  |  |  |  |  |  |  |  |  |  |  |  |  |  |  |  |  |  |  |  |  |  |  |  |  |  |  |  |  |  |  |  |  |  |  |  |  |  |  |  |  |  |  |  |  |  |  |  |  |  |  |  |  |  |  |  |  |  |  |  |  |  |  |  |  |  |  |  |  |  |  |  |  |  |  |  |  |  |  |  |  |  |  |  |  |  |  |  |  |  |  |  |  |  |  |  |  |  |  |  |  |  |  |  |  |  |  |  |  |  |  |  |  |  |  |  |  |  |  |  |  |  |  |  |  |  |  |  |  |  |  |  |  |  |  |  |  |  |  |  |  |  |  |  |  |  |  |  |  |  |  |  |  |  |  |  |  |  |  |  |  |  |  |  |  |  |  |  |  |  |  |  |  |  |  |  |  |  |  |  |  |  |  |  |  |  |  |  |  |  |  |  |  |  |  |  |  |  |  |  |  |  |  |  |  |  |  |  |  |  |  |  |  |  |  |  |  |  |  |  |  |  |  |  |  |  |  |  |  |  |  |  |  |  |  |  |  |  |  |  |  |  |  |  |  |  |  |  |  |  |  |  |  |  |  |  |  |  |  |  |  |  |  |  |  |  |  |  |  |  |  |  |  |  |  |  |  |  |  |  |  |  |  |  |  |  |  |  |  |  |  |  |  |  |  |  |  |  |  |  |  |  |  |  |  |  |  |  |  |  |  |  |  |  |  |  |  |  |  |  |  |  |  |  |  |  |  |  |  |  |  |  |  |  |  |  |  |  |  |  |  |  |  |  |  |  |  |  |  |  |  |  |  |  |  |  |  |  |  |  |  |  |  |  |  |  |  |  |  |  |  |  |  |  |  |  |  |  |  |  |  |  |  |  |  |  |  |  |  |  |  |  |  |  |  |  |  |  |  |  |  |  |  |  |  |  |  |  |  |  |  |  |  |  |  |  |  |  |  |  |  |  |  |  |  |  |  |  |  |  |  |  |  |  |  |  |  |  |  |  |  |  |  |  |  |  |  |  |  |  |  |  |  |  |  |  |  |  |  |  |  |  |  |  |  |  |  |  |  |  |  |  |  |  |  |  |  |  |  |  |  |  |  |  |  |  |  |  |  |  |  |  |  |  |  |  |  |  |  |  |  |  |  |  |  |  |  |  |  |  |  |  |  |  |  |  |  |  |  |  |  |  |  |  |  |  |  |  |  |  |  |  |  |  |  |  |  |  |  |  |  |  |  |  |  |  |  |  |  |  |  |  |  |  |  |  |  |  |  |  |  |  |  |  |  |  |  |  |  |  |  |  |  |  |  |  |  |  |  |  |  |  |  |  |  |  |  |  |  |  |  |  |  |  |  |  |  |  |  |  |  |  |  |  |  |  |  |  |  |  |  |  |  |  |  |  |  |  |  |  |  |  |  |  |  |  |  |  |  |  |  |  |  |  |  |  |  |  |  |  |  |  |  |  |  |  |  |  |  |  |  |  |  |  |  |  |  |  |  |  |  |  |  |  |  |  |  |  |  |  |  |  |  |  |  |  |  |  |  |  |  |  |  |  |  |  |  |  |  |  |  |  |  |  |  |  |  |  |  |  |  |  |  |  |  |  |  |  |  |  |  |  |  |  |  |  |  |  |  |  |  |  |  |  |  |  |  |  |  |  |  |  |  |  |  |  |  |  |  |  |  |  |  |  |  |  |  |  |  |  |  |  |  |  |  |  |  |  |  |  |  |  |  |  |  |  |  |  |  |  |  |  |  |  |  |  |  |  |  |  |  |  |  |  |  |  |  |  |  |  |  |  |  |  |  |  |  |  |  |  |  |  |  |  |  |  |  |  |  |  |  |  |  |  |  |  |  |  |  |  |  |  |  |  |  |  |  |  |  |  |  |  |  |  |  |  |  |  |  |  |  |  |  |  |  |  |  |  |  |  |  |  |  |  |  |  |  |  |  |  |  |  |  |  |  |  |  |  |  |  |  |  |  |  |  |  |  |  |  |  |  |  |  |  |  |  |  |  |  |  |  |  |  |  |  |  |  |  |  |  |  |  |  |  |  |  |  |  |  |  |  |  |  |  |  |  |  |  |  |  |  |  |  |  |  |  |  |  |  |  |  |  |  |  |  |  |  |  |  |  |  |  |  |  |  |  |  |  |  |  |  |  |  |  |  |  |  |  |  |  |  |  |  |  |  |  |  |  |  |  |  |  |  |  |  |  |  |  |  |  |  |  |  |  |  |  |  |  |  |  |  |  |  |  |  |  |  |  |  |  |  |  |  |  |  |  |  |  |  |  |  |  |  |  |  |  |  |  |  |  |  |  |  |  |  |  |  |  |  |  |  |  |  |  |  |  |  |  |  |  |  |  |  |  |  |  |  |  |  |  |  |  |  |  |  |  |  |  |  |  |  |  |  |  |  |  |  |  |  |  |  |  |  |  |  |  |  |  |  |  |  |  |  |  |  |  |  |  |  |  |  |  |  |  |  |  |  |  |  |  |  |  |  |  |  |  |  |  |  |  |  |  |  |  |  |  |  |  |  |  |  |  |  |  |  |  |  |  |  |  |  |  |  |  |  |  |  |  |  |  |  |  |  |  |  |  |  |  |  |  |  |  |  |  |  |  |  |  |  |  |  |  |  |  |  |  |  |  |  |  |  |  |  |  |  |  |  |  |  |  |  |  |  |  |  |  |  |  |  |  |  |  |  |  |  |  |  |  |  |  |  |  |  |  |  |  |  |  |  |  |  |  |  |  |  |  |  |  |  |  |  |  |  |  |  |  |  |  |  |  |  |  |  |  |  |  |  |  |  |  |  |  |  |  |  |  |  |  |  |  |  |  |  |  |  |  |  |  |  |  |  |  |  |  |  |  |  |  |  |  |  |  |  |  |  |  |  |  |  |  |  |  |  |  |  |  |  |  |  |  |  |  |  |  |  |  |  |  |  |  |  |  |  |  |  |  |  |  |  |  |  |  |  |  |  |  |  |  |  |  |  |  |  |  |  |  |  |  |  |  |  |  |  |  |  |  |  |  |  |  |  |  |  |  |  |  |  |  |  |  |  |  |  |  |  |  |  |  |  |  |  |  |  |  |  |  |  |  |  |  |  |  |  |  |  |  |  |  |  |  |  |  |  |  |  |  |  |  |  |  |  |  |  |  |  |  |  |  |  |  |  |  |  |  |  |  |  |  |  |  |  |  |  |  |  |  |  |  |  |  |  |  |  |  |  |  |  |  |  |  |  |  |  |  |  |  |  |  |  |  |  |  |  |  |  |  |  |  |  |  |  |  |  |  |  |  |  |  |  |  |  |  |  |  |  |  |  |  |  |  |  |  |  |  |  |  |  |  |  |  |  |  |  |  |  |  |  |  |  |  |  |  |  |  |  |  |  |  |  |  |  |  |  |  |  |  |  |  |  |  |  |  |  |  |  |  |  |  |  |  |  |  |  |  |  |  |  |  |  |  |  |  |  |  |  |  |  |  |  |  |  |  |  |  |  |  |  |  |  |  |  |  |  |  |  |  |  |  |  |  |  |  |  |  |  |  |  |  |  |  |  |  |  |  |  |  |  |  |  |  |  |  |  |  |  |  |  |  |  |  |  |  |  |  |  |  |  |  |  |  |  |  |  |  |  |  |  |  |  |  |  |  |  |  |  |  |  |  |  |  |  |  |  |  |  |  |  |  |  |  |  |  |  |  |  |  |  |  |  |  |  |  |  |  |  |  |  |  |  |  |  |  |  |  |  |  |  |  |  |  |  |  |  |  |  |  |  |  |  |  |  |  |  |  |  |  |  |  |  |  |  |  |  |  |  |  |  |  |  |  |  |  |  |  |  |  |  |  |  |  |  |  |  |  |  |  |  |  |  |  |  |  |  |  |  |  |  |  |  |  |  |  |  |  |  |  |  |  |  |  |  |  |  |  |  |  |  |  |  |  |  |  |  |  |  |  |  |  |  |  |  |  |  |  |  |  |  |  |  |  |  |  |  |  |  |  |  |  |  |  |  |  |  |  |  |  |  |  |  |  |  |  |  |  |  |  |  |  |  |  |  |  |  |  |  |  |  |  |  |  |  |  |  |  |  |  |  |  |  |  |  |  |  |  |  |  |  |  |  |  |  |  |  |  |  |  |  |  |  |  |  |  |  |  |  |  |  |  |  |  |  |  |  |  |  |  |  |  |  |  |  |  |  |  |  |  |  |  |  |  |  |  |  |  |  |  |  |  |  |  |  |  |  |  |  |  |  |  |  |  |  |  |  |  |  |  |  |  |  |  |  |  |  |  |  |  |  |  |  |  |  |  |  |  |  |  |  |  |  |  |  |  |  |  |  |  |  |  |  |  |  |  |  |  |  |  |  |  |  |  |  |  |  |  |  |  |  |  |  |  |  |  |  |  |  |  |  |  |  |  |  |  |  |  |  |  |  |  |  |  |  |  |  |  |  |  |  |  |  |  |  |  |  |  |  |  |  |  |  |  |  |  |  |  |  |  |  |  |  |  |  |  |  |  |  |  |  |  |  |  |  |  |  |  |  |  |  |  |  |  |  |  |  |  |  |  |  |  |  |  |  |  |  |  |  |  |  |  |  |  |  |  |  |  |  |  |  |  |  |  |  |  |  |  |  |  |  |  |  |  |  |  |  |  |  |  |  |  |  |  |  |  |  |  |  |  |  |  |  |  |  |  |  |  |  |  |  |  |  |  |  |  |  |  |  |  |  |  |  |  |  |  |  |  |  |  |  |  |  |  |  |  |  |  |  |  |  |  |  |  |  |  |  |  |  |  |  |  |  |  |  |  |  |  |  |  |  |  |  |  |  |  |  |  |  |  |  |  |  |  |  |  |  |  |  |  |  |  |  |  |  |  |  |  |  |  |  |  |  |  |  |  |  |  |  |  |  |  |  |  |  |  |  |  |  |  |  |  |  |  |  |  |  |  |  |  |  |  |  |  |  |  |  |  |  |  |  |  |  |  |  |  |  |  |  |  |  |  |  |  |  |  |  |  |  |  |  |  |  |  |  |  |  |  |  |  |  |  |  |  |  |  |  |  |  |  |  |  |  |  |  |  |  |  |  |  |  |  |  |  |  |  |  |  |  |  |  |  |  |  |  |  |  |  |  |  |  |  |  |  |  |  |  |  |  |  |  |  |  |  |  |  |  |  |  |  |  |  |  |  |  |  |  |  |  |  |  |  |  |  |  |  |  |  |  |  |  |  |  |  |  |  |  |  |  |  |  |  |  |  |  |  |  |  |  |  |  |  |  |  |  |  |  |  |  |  |  |  |  |  |  |  |  |  |  |  |  |  |  |  |  |  |  |  |  |  |  |  |  |  |  |  |  |  |  |  |  |  |  |  |  |  |  |  |  |  |  |  |  |  |  |  |  |  |  |  |  |  |  |  |  |  |  |  |  |  |  |  |  |  |  |  |  |  |  |  |  |  |  |  |  |  |  |  |  |  |  |  |  |  |  |  |  |  |  |  |  |  |  |  |  |  |  |  |  |  |  |  |  |  |  |  |  |  |  |  |  |  |  |  |  |  |  |  |  |  |  |  |  |  |  |  |  |  |  |  |  |  |  |  |  |  |  |  |  |  |  |  |  |  |  |  |  |  |  |  |  |  |  |  |  |  |  |  |  |  |  |  |  |  |  |  |  |  |  |  |  |  |  |  |  |  |  |  |  |  |  |  |  |  |  |  |  |  |  |  |  |  |  |  |  |  |  |  |  |  |  |  |  |  |  |  |  |  |  |  |  |  |  |  |  |  |  |  |  |  |  |  |  |  |  |  |  |  |  |  |  |  |  |  |  |  |  |  |  |  |  |  |  |  |  |  |  |  |  |  |  |  |  |  |  |  |  |  |  |  |  |  |  |  |  |  |  |  |  |  |  |  |  |  |  |  |  |  |  |  |  |  |  |  |  |  |  |  |  |  |  |  |  |  |  |  |  |  |  |  |  |  |  |  |  |  |  |  |  |  |  |  |  |  |  |  |  |  |  |  |  |  |  |  |  |  |  |  |  |  |  |  |  |  |  |  |  |  |  |  |  |  |  |  |  |  |  |  |  |  |  |  |  |  |  |  |  |  |  |  |  |  |  |  |  |  |  |  |  |  |  |  |  |  |  |  |  |  |  |  |  |  |  |  |  |  |  |  |  |  |  |  |  |  |  |  |  |  |  |  |  |  |  |  |  |  |  |  |  |  |  |  |  |  |  |  |  |  |  |  |  |  |  |  |  |  |  |  |  |  |  |  |  |  |  |  |  |  |  |  |  |  |  |  |  |  |  |  |  |  |  |  |  |  |  |  |  |  |  |  |  |  |  |  |  |  |  |  |  |  |  |  |  |  |  |  |  |  |  |  |  |  |  |  |  |  |  |  |  |  |  |  |  |  |  |  |  |  |  |  |  |  |  |  |  |  |  |  |  |  |  |  |  |  |  |  |  |  |  |  |  |  |  |  |  |  |  |  |  |  |  |  |  |  |  |  |  |  |  |  |  |  |  |  |  |  |  |  |  |  |  |  |  |  |  |  |  |  |  |  |  |  |  |  |  |  |  |  |  |  |  |  |  |  |  |  |  |  |  |  |  |  |  |  |  |  |  |  |  |  |  |  |  |  |  |  |  |  |  |  |  |  |  |  |  |  |  |  |  |  |  |  |  |  |  |  |  |  |  |  |  |  |  |  |  |  |  |  |  |  |  |  |  |  |  |  |  |  |  |  |  |  |  |  |  |  |  |  |  |  |  |  |  |  |  |  |  |  |  |  |  |  |  |  |  |  |  |  |  |  |  |  |  |  |  |  |  |  |  |  |  |  |  |  |  |  |  |  |  |  |  |  |  |  |  |  |  |  |  |  |  |  |  |  |  |  |  |  |  |  |  |  |  |  |  |  |  |  |  |  |  |  |  |  |  |  |  |  |  |  |  |  |  |  |  |  |  |  |  |  |  |  |  |  |  |  |  |  |  |  |  |  |  |  |  |  |  |  |  |  |  |  |  |  |  |  |  |  |  |  |  |  |  |  |  |  |  |  |  |  |  |  |  |  |  |  |  |  |  |  |  |  |  |  |  |  |  |  |  |  |  |  |  |  |  |  |  |  |  |  |  |  |  |  |  |  |  |  |  |  |  |  |  |  |  |  |  |  |  |  |  |  |  |  |  |  |  |  |  |  |  |  |  |  |  |  |  |  |  |  |  |  |  |  |  |  |  |  |  |  |  |  |  |  |  |  |  |  |  |  |  |  |  |  |  |  |  |  |  |  |  |  |  |  |  |  |  |  |  |  |  |  |  |  |  |  |  |  |  |  |  |  |  |  |  |  |  |  |  |  |  |  |  |  |  |  |  |  |  |  |  |  |  |  |  |  |  |  |  |  |  |  |  |  |  |  |  |  |  |  |  |  |  |  |  |  |  |  |  |  |  |  |  |  |  |  |  |  |  |  |  |  |  |  |  |  |  |  |  |  |  |  |  |  |  |  |  |  |  |  |  |  |  |  |  |  |  |  |  |  |  |  |  |  |  |  |  |  |  |  |  |  |  |  |  |  |  |  |  |  |  |  |  |  |  |  |  |  |  |  |  |  |  |  |  |  |  |  |  |  |  |  |  |  |  |  |  |  |  |  |  |  |  |  |  |  |  |  |  |  |  |  |  |  |  |  |  |  |  |  |  |  |  |  |  |  |  |  |  |  |  |  |  |  |  |  |  |  |  |  |  |  |  |  |  |  |  |  |  |  |  |  |  |  |  |  |  |  |  |  |  |  |  |  |  |  |  |  |  |  |  |  |  |  |  |  |  |  |  |  |  |  |  |  |  |  |  |  |  |  |  |  |  |  |  |  |  |  |  |  |  |  |  |  |  |  |  |  |  |  |  |  |  |  |  |  |  |  |  |  |  |  |  |  |  |  |  |  |  |  |  |  |  |  |  |  |  |  |  |  |  |  |  |  |  |  |  |  |  |  |  |  |  |  |  |  |  |  |  |  |  |  |  |  |  |  |  |  |  |  |  |  |  |  |  |  |  |  |  |  |  |  |  |  |  |  |  |  |  |  |  |  |  |  |  |  |  |  |  |  |  |  |  |  |  |  |  |  |  |  |  |  |  |  |  |  |  |  |  |  |  |  |  |  |  |  |  |  |  |  |  |  |  |  |  |  |  |  |  |  |  |  |  |  |  |  |  |  |  |  |  |  |  |  |  |  |  |  |  |  |  |  |  |  |  |  |  |  |  |  |  |  |  |  |  |  |  |  |  |  |  |  |  |  |  |  |  |  |  |  |  |  |  |  |  |  |  |  |  |  |  |  |  |  |  |  |  |  |  |  |  |  |  |  |  |  |  |  |  |  |  |  |  |  |  |  |  |  |  |  |  |  |  |  |  |  |  |  |  |  |  |  |  |  |  |  |  |  |  |  |  |  |  |  |  |  |  |  |  |  |  |  |  |  |  |  |  |  |  |  |  |  |  |  |  |  |  |  |  |  |  |  |  |  |  |  |  |  |  |  |  |  |  |  |  |  |  |  |  |  |  |  |  |  |  |  |  |  |  |  |  |  |  |  |  |  |  |  |  |  |  |  |  |  |  |  |  |  |  |  |  |  |  |  |  |  |  |  |  |  |  |  |  |  |  |  |  |  |  |  |  |  |  |  |  |  |  |  |  |  |  |  |  |  |  |  |  |  |  |  |  |  |  |  |  |  |  |  |  |  |  |  |  |  |  |  |  |  |  |  |  |  |  |  |  |  |  |  |  |  |  |  |  |  |  |  |  |  |  |  |  |  |  |  |  |  |  |  |  |  |  |  |  |  |  |  |  |  |  |  |  |  |  |  |  |  |  |  |  |  |  |  |  |  |  |  |  |  |  |  |  |  |  |  |  |  |  |  |  |  |  |  |  |  |  |  |  |  |  |  |  |  |  |  |  |  |  |  |  |  |  |  |  |  |  |  |  |  |  |  |  |  |  |  |  |  |  |  |  |  |  |  |  |  |  |  |  |  |  |  |  |  |  |  |  |  |  |  |  |  |  |  |  |  |  |  |  |  |  |  |  |  |  |  |  |  |  |  |  |  |  |  |  |  |  |  |  |  |  |  |  |  |  |  |  |  |  |  |  |  |  |  |  |  |  |  |  |  |  |  |  |  |  |  |  |  |  |  |  |  |  |  |  |  |  |  |  |  |  |  |  |  |  |  |  |  |  |  |  |  |  |  |  |  |  |  |  |  |  |  |  |  |  |  |  |  |  |  |  |  |  |  |  |  |  |  |  |  |  |  |  |  |  |  |  |  |  |  |  |  |  |  |  |  |  |  |  |  |  |  |  |  |  |  |  |  |  |  |  |  |  |  |  |  |  |  |  |  |  |  |  |  |  |  |  |  |  |  |  |  |  |  |  |  |  |  |  |  |  |  |  |  |  |  |  |  |  |  |  |  |  |  |  |  |  |  |  |  |  |  |  |  |  |  |  |  |  |  |  |  |  |  |  |  |  |  |  |  |  |  |  |  |  |  |  |  |  |  |  |  |  |  |  |  |  |  |  |  |  |  |  |  |  |  |  |  |  |  |  |  |  |  |  |  |  |  |  |  |  |  |  |  |  |  |  |  |  |  |  |  |  |  |  |  |  |  |  |  |  |  |  |  |  |  |  |  |  |  |  |  |  |  |  |  |  |  |  |  |  |  |  |  |  |  |  |  |  |  |  |  |  |  |  |  |  |  |  |  |  |  |  |  |  |  |  |  |  |  |  |  |  |  |  |  |  |  |  |  |  |  |  |  |  |  |  |  |  |  |  |  |  |  |  |  |  |  |  |  |  |  |  |  |  |  |  |  |  |  |  |  |  |  |  |  |  |  |  |  |  |  |  |  |  |  |  |  |  |  |  |  |  |  |  |  |  |  |  |  |  |  |  |  |  |  |  |  |  |  |  |  |  |  |  |  |  |  |  |  |  |  |  |  |  |  |  |  |  |  |  |  |  |  |  |  |  |  |  |  |  |  |  |  |  |  |  |  |  |  |  |  |  |  |  |  |  |  |  |  |  |  |  |  |  |  |  |  |  |  |  |  |  |  |  |  |  |  |  |  |  |  |  |  |  |  |  |  |  |  |  |  |  |  |  |  |  |  |  |  |  |  |  |  |  |  |  |  |  |  |  |  |  |  |  |  |  |  |  |  |  |  |  |  |  |  |  |  |  |  |  |  |  |  |  |  |  |  |  |  |  |  |  |  |  |  |  |  |  |  |  |  |  |  |  |  |  |  |  |  |  |  |  |  |  |  |  |  |  |  |  |  |  |  |  |  |  |  |  |  |  |  |  |  |  |  |  |  |  |  |  |  |  |  |  |  |  |  |  |  |  |  |  |  |  |  |  |  |  |  |  |  |  |  |  |  |  |  |  |  |  |  |  |  |  |  |  |  |  |  |  |  |  |  |  |  |  |  |  |  |  |  |  |  |  |  |  |  |  |  |  |  |  |  |  |  |  |  |  |  |  |  |  |  |  |  |  |  |  |  |  |  |  |  |  |  |  |  |  |  |  |  |  |  |  |  |  |  |  |  |  |  |  |  |  |  |  |  |  |  |  |  |  |  |  |  |  |  |  |  |  |  |  |  |  |  |  |  |  |  |  |  |  |  |  |  |  |  |  |  |  |  |  |  |  |  |  |  |  |  |  |  |  |  |  |  |  |  |  |  |  |  |  |  |  |  |  |  |  |  |  |  |  |  |  |  |  |  |  |  |  |  |  |  |  |  |  |  |  |  |  |  |  |  |  |  |  |  |  |  |  |  |  |  |  |  |  |  |  |  |  |  |  |  |  |  |  |  |  |  |  |  |  |  |  |  |  |  |  |  |  |  |  |  |  |  |  |  |  |  |  |  |  |  |  |  |  |  |  |  |  |  |  |  |  |  |  |  |  |  |  |  |  |  |  |  |  |  |  |  |  |  |  |  |  |  |  |  |  |  |  |  |  |  |  |  |  |  |  |  |  |  |  |  |  |  |  |  |  |  |  |  |  |  |  |  |  |  |  |  |  |  |  |  |  |  |  |  |  |  |  |  |  |  |  |  |  |  |  |  |  |  |  |  |  |  |  |  |  |  |  |  |  |  |  |  |  |  |  |  |  |  |  |  |  |  |  |  |  |  |  |  |  |  |  |  |  |  |  |  |  |  |  |  |  |  |  |  |  |  |  |  |  |  |  |  |  |  |  |  |  |  |  |  |  |  |  |  |  |  |  |  |  |  |  |  |  |  |  |  |  |  |  |  |  |  |  |  |  |  |  |  |  |  |  |  |  |  |  |  |  |  |  |  |  |  |  |  |  |  |  |  |  |  |  |  |  |  |  |  |  |  |  |  |  |  |  |  |  |  |  |  |  |  |  |  |  |  |  |  |  |  |  |  |  |  |  |  |  |  |  |  |  |  |  |  |  |  |  |  |  |  |  |  |  |  |  |  |  |  |  |  |  |  |  |  |  |  |  |  |  |  |  |  |  |  |  |  |  |  |  |  |  |  |  |  |  |  |  |  |  |  |  |  |  |  |  |  |  |  |  |  |  |  |  |  |  |  |  |  |  |  |  |  |  |  |  |  |  |  |  |  |  |  |  |  |  |  |  |  |  |  |  |  |  |  |  |  |  |  |  |  |  |  |  |  |  |  |  |  |  |  |  |  |  |  |  |  |  |  |  |  |  |  |  |  |  |  |  |  |  |  |  |  |  |  |  |  |  |  |  |  |  |  |  |  |  |  |  |  |  |  |  |  |  |  |  |  |  |  |  |  |  |  |  |  |  |  |  |  |  |  |  |  |  |  |  |  |  |  |  |  |  |  |  |  |  |  |  |  |  |  |  |  |  |  |  |  |  |  |  |  |  |  |  |  |  |  |  |  |  |  |  |  |  |  |  |  |  |  |  |  |  |  |  |  |  |  |  |  |  |  |  |  |  |  |  |  |  |  |  |  |  |  |  |  |  |  |  |  |  |  |  |  |  |  |  |  |  |  |  |  |  |  |  |  |  |  |  |  |  |  |  |  |  |  |  |  |  |  |  |  |  |  |  |  |  |  |  |  |  |  |  |  |  |  |  |  |  |  |  |  |  |  |  |  |  |  |  |  |  |  |  |  |  |  |  |  |  |  |  |  |  |  |  |  |  |  |  |  |  |  |  |  |  |  |  |  |  |  |  |  |  |  |  |  |  |  |  |  |  |  |  |  |  |  |  |  |  |  |  |  |  |  |  |  |  |  |  |  |  |  |  |  |  |  |  |  |  |  |  |  |  |  |  |  |  |  |  |  |  |  |  |  |  |  |  |  |  |  |  |  |  |  |  |  |  |  |  |  |  |  |  |  |  |  |  |  |  |  |  |  |  |  |  |  |  |  |  |  |  |  |  |  |  |  |  |  |  |  |  |  |  |  |  |  |  |  |  |  |  |  |  |  |  |  |  |  |  |  |  |  |  |  |  |  |  |  |  |  |  |  |  |  |  |  |  |  |  |  |  |  |  |  |  |  |  |  |  |  |  |  |  |  |  |  |  |  |  |  |  |  |  |  |  |  |  |  |  |  |  |  |  |  |  |  |  |  |  |  |  |  |  |  |  |  |  |  |  |  |  |  |  |  |  |  |  |  |  |  |  |  |  |  |  |  |  |  |  |  |  |  |  |  |  |  |  |  |  |  |  |  |  |  |  |  |  |  |  |  |  |  |  |  |  |  |  |  |  |  |  |  |  |  |  |  |  |  |  |  |  |  |  |  |  |  |  |  |  |  |  |  |  |  |  |  |  |  |  |  |  |  |  |  |  |  |  |  |  |  |  |  |  |  |  |  |  |  |  |  |  |  |  |  |  |  |  |  |  |  |  |  |  |  |  |  |  |  |  |  |  |  |  |  |  |  |  |  |  |  |  |  |  |  |  |  |  |  |  |  |  |  |  |  |  |  |  |  |  |  |  |  |  |  |  |
|--------|----------------------------------------------------------------------------------------------|--|--|--|--|--|--|--|--|------|--|--|--|--|--|--|--|--|--|--|-----------------------|--|--|--|--|--|--|--|--|--|--|--|--|--|--|--|--|--|--|--|---------------|--|--|--|--|--|--|--|--|--|--|--|--|--|--|--|--|--|--|--|----------|--|--|--|--|--|--|--|--|--|--|--|--|--|--|--|--|--|--|--|-------------------|--|--|--|--|--|--|--|--|--|--|--|--|--|--|--|--|--|--|--|-------|--|--|--|--|--|--|--|--|--|--|--|--|--|--|--|--|--|--|--|------------------|--|--|--|--|--|--|--|--|--|--|--|--|--|--|--|--|--|--|--|-------|--|--|--|--|--|--|--|--|--|--|--|--|--|--|--|--|--|--|--|-----|-----|--|--|--|--|--|--|--|--|--|--|--|--|--|--|--|--|--|--|--|--|--|--|--|--|--|--|--|--|--|--|--|--|--|--|--|--|--|--|--|--|--|--|--|--|--|--|--|--|--|--|--|--|--|--|--|--|--|--|--|--|--|--|--|--|--|--|--|--|--|--|--|--|--|--|--|--|--|--|--|--|--|--|--|--|--|--|--|--|--|--|--|--|--|--|--|--|--|--|--|--|--|--|--|--|--|--|--|--|--|--|--|--|--|--|--|--|--|--|--|--|--|--|--|--|--|--|--|--|--|--|--|--|--|--|--|--|--|--|--|--|--|--|--|--|--|--|--|--|--|--|--|--|--|--|--|--|--|--|--|--|--|--|--|--|--|--|--|--|--|--|--|--|--|--|--|--|--|--|--|--|--|--|--|--|--|--|--|--|--|--|--|--|--|--|--|--|--|--|--|--|--|--|--|--|--|--|--|--|--|--|--|--|--|--|--|--|--|--|--|--|--|--|--|--|--|--|--|--|--|--|--|--|--|--|--|--|--|--|--|--|--|--|--|--|--|--|--|--|--|--|--|--|--|--|--|--|--|--|--|--|--|--|--|--|--|--|--|--|--|--|--|--|--|--|--|--|--|--|--|--|--|--|--|--|--|--|--|--|--|--|--|--|--|--|--|--|--|--|--|--|--|--|--|--|--|--|--|--|--|--|--|--|--|--|--|--|--|--|--|--|--|--|--|--|--|--|--|--|--|--|--|--|--|--|--|--|--|--|--|--|--|--|--|--|--|--|--|--|--|--|--|--|--|--|--|--|--|--|--|--|--|--|--|--|--|--|--|--|--|--|--|--|--|--|--|--|--|--|--|--|--|--|--|--|--|--|--|--|--|--|--|--|--|--|--|--|--|--|--|--|--|--|--|--|--|--|--|--|--|--|--|--|--|--|--|--|--|--|--|--|--|--|--|--|--|--|--|--|--|--|--|--|--|--|--|--|--|--|--|--|--|--|--|--|--|--|--|--|--|--|--|--|--|--|--|--|--|--|--|--|--|--|--|--|--|--|--|--|--|--|--|--|--|--|--|--|--|--|--|--|--|--|--|--|--|--|--|--|--|--|--|--|--|--|--|--|--|--|--|--|--|--|--|--|--|--|--|--|--|--|--|--|--|--|--|--|--|--|--|--|--|--|--|--|--|--|--|--|--|--|--|--|--|--|--|--|--|--|--|--|--|--|--|--|--|--|--|--|--|--|--|--|--|--|--|--|--|--|--|--|--|--|--|--|--|--|--|--|--|--|--|--|--|--|--|--|--|--|--|--|--|--|--|--|--|--|--|--|--|--|--|--|--|--|--|--|--|--|--|--|--|--|--|--|--|--|--|--|--|--|--|--|--|--|--|--|--|--|--|--|--|--|--|--|--|--|--|--|--|--|--|--|--|--|--|--|--|--|--|--|--|--|--|--|--|--|--|--|--|--|--|--|--|--|--|--|--|--|--|--|--|--|--|--|--|--|--|--|--|--|--|--|--|--|--|--|--|--|--|--|--|--|--|--|--|--|--|--|--|--|--|--|--|--|--|--|--|--|--|--|--|--|--|--|--|--|--|--|--|--|--|--|--|--|--|--|--|--|--|--|--|--|--|--|--|--|--|--|--|--|--|--|--|--|--|--|--|--|--|--|--|--|--|--|--|--|--|--|--|--|--|--|--|--|--|--|--|--|--|--|--|--|--|--|--|--|--|--|--|--|--|--|--|--|--|--|--|--|--|--|--|--|--|--|--|--|--|--|--|--|--|--|--|--|--|--|--|--|--|--|--|--|--|--|--|--|--|--|--|--|--|--|--|--|--|--|--|--|--|--|--|--|--|--|--|--|--|--|--|--|--|--|--|--|--|--|--|--|--|--|--|--|--|--|--|--|--|--|--|--|--|--|--|--|--|--|--|--|--|--|--|--|--|--|--|--|--|--|--|--|--|--|--|--|--|--|--|--|--|--|--|--|--|--|--|--|--|--|--|--|--|--|--|--|--|--|--|--|--|--|--|--|--|--|--|--|--|--|--|--|--|--|--|--|--|--|--|--|--|--|--|--|--|--|--|--|--|--|--|--|--|--|--|--|--|--|--|--|--|--|--|--|--|--|--|--|--|--|--|--|--|--|--|--|--|--|--|--|--|--|--|--|--|--|--|--|--|--|--|--|--|--|--|--|--|--|--|--|--|--|--|--|--|--|--|--|--|--|--|--|--|--|--|--|--|--|--|--|--|--|--|--|--|--|--|--|--|--|--|--|--|--|--|--|--|--|--|--|--|--|--|--|--|--|--|--|--|--|--|--|--|--|--|--|--|--|--|--|--|--|--|--|--|--|--|--|--|--|--|--|--|--|--|--|--|--|--|--|--|--|--|--|--|--|--|--|--|--|--|--|--|--|--|--|--|--|--|--|--|--|--|--|--|--|--|--|--|--|--|--|--|--|--|--|--|--|--|--|--|--|--|--|--|--|--|--|--|--|--|--|--|--|--|--|--|--|--|--|--|--|--|--|--|--|--|--|--|--|--|--|--|--|--|--|--|--|--|--|--|--|--|--|--|--|--|--|--|--|--|--|--|--|--|--|--|--|--|--|--|--|--|--|--|--|--|--|--|--|--|--|--|--|--|--|--|--|--|--|--|--|--|--|--|--|--|--|--|--|--|--|--|--|--|--|--|--|--|--|--|--|--|--|--|--|--|--|--|--|--|--|--|--|--|--|--|--|--|--|--|--|--|--|--|--|--|--|--|--|--|--|--|--|--|--|--|--|--|--|--|--|--|--|--|--|--|--|--|--|--|--|--|--|--|--|--|--|--|--|--|--|--|--|--|--|--|--|--|--|--|--|--|--|--|--|--|--|--|--|--|--|--|--|--|--|--|--|--|--|--|--|--|--|--|--|--|--|--|--|--|--|--|--|--|--|--|--|--|--|--|--|--|--|--|--|--|--|--|--|--|--|--|--|--|--|--|--|--|--|--|--|--|--|--|--|--|--|--|--|--|--|--|--|--|--|--|--|--|--|--|--|--|--|--|--|--|--|--|--|--|--|--|--|--|--|--|--|--|--|--|--|--|--|--|--|--|--|--|--|--|--|--|--|--|--|--|--|--|--|--|--|--|--|--|--|--|--|--|--|--|--|--|--|--|--|--|--|--|--|--|--|--|--|--|--|--|--|--|--|--|--|--|--|--|--|--|--|--|--|--|--|--|--|--|--|--|--|--|--|--|--|--|--|--|--|--|--|--|--|--|--|--|--|--|--|--|--|--|--|--|--|--|--|--|--|--|--|--|--|--|--|--|--|--|--|--|--|--|--|--|--|--|--|--|--|--|--|--|--|--|--|--|--|--|--|--|--|--|--|--|--|--|--|--|--|--|--|--|--|--|--|--|--|--|--|--|--|--|--|--|--|--|--|--|--|--|--|--|--|--|--|--|--|--|--|--|--|--|--|--|--|--|--|--|--|--|--|--|--|--|--|--|--|--|--|--|--|--|--|--|--|--|--|--|--|--|--|--|--|--|--|--|--|--|--|--|--|--|--|--|--|--|--|--|--|--|--|--|--|--|--|--|--|--|--|--|--|--|--|--|--|--|--|--|--|--|--|--|--|--|--|--|--|--|--|--|--|--|--|--|--|--|--|--|--|--|--|--|--|--|--|--|--|--|--|--|--|--|--|--|--|--|--|--|--|--|--|--|--|--|--|--|--|--|--|--|--|--|--|--|--|--|--|--|--|--|--|--|--|--|--|--|--|--|--|--|--|--|--|--|--|--|--|--|--|--|--|--|--|--|--|--|--|--|--|--|--|--|--|--|--|--|--|--|--|--|--|--|--|--|--|--|--|--|--|--|--|--|--|--|--|--|--|--|--|--|--|--|--|--|--|--|--|--|--|--|--|--|--|--|--|--|--|--|--|--|--|--|--|--|--|--|--|--|--|--|--|--|--|--|--|--|--|--|--|--|--|--|--|--|--|--|--|--|--|--|--|--|--|--|--|--|--|--|--|--|--|--|--|--|--|--|--|--|--|--|--|--|--|--|--|--|--|--|--|--|--|--|--|--|--|--|--|--|--|--|--|--|--|--|--|--|--|--|--|--|--|--|--|--|--|--|--|--|--|--|--|--|--|--|--|--|--|--|--|--|--|--|--|--|--|--|--|--|--|--|--|--|--|--|--|--|--|--|--|--|--|--|--|--|--|--|--|--|--|--|--|--|--|--|--|--|--|--|--|--|--|--|--|--|--|--|--|--|--|--|--|--|--|--|--|--|--|--|--|--|--|--|--|--|--|--|--|--|--|--|--|--|--|--|--|--|--|--|--|--|--|--|--|--|--|--|--|--|--|--|--|--|--|--|--|--|--|--|--|--|--|--|--|--|--|--|--|--|--|--|--|--|--|--|--|--|--|--|--|--|--|--|--|--|--|--|--|--|--|--|--|--|--|--|--|--|--|--|--|--|--|--|--|--|--|--|--|--|--|--|--|--|--|--|--|--|--|--|--|--|--|--|--|--|--|--|--|--|--|--|--|--|--|--|--|--|--|--|--|--|--|--|--|--|--|--|--|--|--|--|--|--|--|--|--|--|--|--|--|--|--|--|--|--|--|--|--|--|--|--|--|--|--|--|--|--|--|--|--|--|--|--|--|--|--|--|--|--|--|--|--|--|--|--|--|--|--|--|--|--|--|--|--|--|--|--|--|--|--|--|--|--|--|--|--|--|--|--|--|--|--|--|--|--|--|--|--|--|--|--|--|--|--|--|--|--|--|--|--|--|--|--|--|--|--|--|--|--|--|--|--|--|--|--|--|--|--|--|--|--|--|--|--|--|--|--|--|--|--|--|--|--|--|--|--|--|--|--|--|--|--|--|--|--|--|--|--|--|--|--|--|--|--|--|--|--|--|--|--|--|--|--|--|--|--|--|--|--|--|--|--|--|--|--|--|--|--|--|--|--|--|--|--|--|--|--|--|--|--|--|--|--|--|--|--|--|--|--|--|--|--|--|--|--|--|--|--|--|--|--|--|--|--|--|--|--|--|--|--|--|--|--|--|--|--|--|--|--|--|--|--|--|--|--|--|--|--|--|--|--|--|--|--|--|--|--|--|--|--|--|--|--|--|--|--|--|--|--|--|--|--|--|--|--|--|--|--|--|--|--|--|--|--|--|--|--|--|--|--|--|--|--|--|--|--|--|--|--|--|--|--|--|--|--|--|--|--|--|--|--|--|--|--|--|--|--|--|--|--|--|--|--|--|--|--|--|--|--|--|--|--|--|--|--|--|--|--|--|--|--|--|--|--|--|--|--|--|--|--|--|--|--|--|--|--|--|--|--|--|--|--|--|--|--|--|--|--|--|--|--|--|--|--|--|--|--|--|--|--|--|--|--|--|--|--|--|--|--|--|--|--|--|--|--|--|--|--|--|--|--|--|--|--|--|--|--|--|--|--|--|--|--|--|--|--|--|--|--|--|--|--|--|--|--|--|--|--|--|--|--|--|--|--|--|--|--|--|--|--|--|--|--|--|--|--|--|--|--|--|--|--|--|--|--|--|--|--|--|--|--|--|--|--|--|--|--|--|--|--|--|--|--|--|--|--|--|--|--|--|--|--|--|--|--|--|--|--|--|--|--|--|--|--|--|--|--|--|--|--|--|--|--|--|--|--|--|--|--|--|--|--|--|--|--|--|--|--|--|--|--|--|--|--|--|--|--|--|--|--|--|--|--|--|--|--|--|--|--|--|--|--|--|--|--|--|--|--|--|--|--|--|--|--|--|--|--|--|--|--|--|--|--|--|--|--|--|--|--|--|--|--|--|--|--|--|--|--|--|--|--|--|--|--|--|--|--|--|--|--|--|--|--|--|--|--|--|--|--|--|--|--|--|--|--|--|--|--|--|--|--|--|--|--|--|--|--|--|--|--|--|--|--|--|--|--|--|--|--|--|--|--|--|--|--|--|--|--|--|--|--|--|--|--|--|--|--|--|--|--|--|--|--|--|--|--|--|--|--|--|--|--|--|--|--|--|--|--|--|--|--|--|--|--|--|--|--|--|--|--|--|--|--|--|--|--|--|--|--|--|--|--|--|--|--|--|--|--|--|--|--|--|--|--|--|--|--|--|--|--|--|--|--|--|--|--|--|--|--|--|--|--|--|--|--|--|--|--|--|--|--|--|--|--|--|--|--|--|--|--|--|--|--|--|--|--|--|--|--|--|--|--|--|--|--|--|--|--|--|--|--|--|--|--|--|--|--|--|--|--|--|--|--|--|--|--|--|--|--|--|--|--|--|--|--|--|--|--|--|--|--|--|--|--|--|--|--|--|--|--|--|--|--|--|--|--|--|--|--|--|--|--|--|--|--|--|--|--|--|--|--|--|--|--|--|--|--|--|--|--|--|--|--|--|--|--|--|--|--|--|--|--|--|--|--|--|--|--|--|--|--|--|--|--|--|--|--|--|--|--|--|--|--|--|--|--|--|--|--|--|--|--|--|--|--|--|--|--|--|--|--|--|--|--|--|--|--|--|--|--|--|--|--|--|--|--|--|--|--|--|--|--|--|--|--|--|--|--|--|--|--|--|--|--|--|--|--|--|--|--|--|--|--|--|--|--|--|--|--|--|--|--|--|--|--|--|--|--|--|--|--|--|--|--|--|--|--|--|--|--|--|--|--|--|--|--|--|--|--|--|--|--|--|--|--|--|--|--|--|--|--|--|--|--|--|--|--|--|--|--|--|--|--|--|--|--|--|--|--|--|--|--|--|--|--|--|--|--|--|--|--|--|--|--|--|--|--|--|--|--|--|--|--|--|--|--|--|--|--|--|--|--|--|--|--|--|--|--|--|--|--|--|--|--|--|--|--|--|--|--|--|--|--|--|--|--|--|--|--|--|--|--|--|--|--|--|--|--|--|--|--|--|--|--|--|--|--|--|--|--|--|--|--|--|--|--|--|--|--|--|--|--|--|--|--|--|--|--|--|--|--|--|--|--|--|--|--|--|--|--|--|--|--|--|--|--|--|--|--|--|--|--|--|--|--|--|--|--|--|--|--|--|--|--|--|--|--|--|--|--|--|--|--|--|--|--|--|--|--|--|--|--|--|--|--|--|--|--|--|--|--|--|--|--|--|--|--|--|--|--|--|--|--|--|--|--|--|--|--|--|--|--|--|--|--|--|--|--|--|--|--|--|--|--|--|--|--|--|--|--|--|--|--|--|--|--|--|--|--|--|--|--|--|--|--|--|--|--|--|--|--|--|--|--|--|--|--|--|--|--|--|--|--|--|--|--|--|--|--|--|--|--|--|--|--|--|--|--|--|--|--|--|--|--|--|--|--|--|--|--|--|--|--|--|--|--|--|--|--|--|--|--|--|--|--|--|--|--|--|--|--|--|--|--|--|--|--|--|--|--|--|--|--|--|--|--|--|--|--|--|--|--|--|--|--|--|--|--|--|--|--|--|--|--|--|--|--|--|--|--|--|--|--|--|--|--|--|--|--|--|--|--|--|--|--|--|--|--|--|--|--|--|--|--|--|--|--|--|--|--|--|--|--|--|--|--|--|--|--|--|--|--|--|--|--|--|--|--|--|--|--|--|--|--|--|--|--|--|--|--|--|--|--|--|--|--|--|--|--|--|--|--|--|--|--|--|--|--|--|--|--|--|--|--|--|--|--|--|--|--|--|--|--|--|--|--|--|--|--|--|--|--|--|--|--|--|--|--|--|--|--|--|--|--|--|--|--|--|--|--|--|--|--|--|--|--|--|--|--|--|--|--|--|--|--|--|--|--|--|--|--|--|--|--|--|--|--|--|--|--|--|--|--|--|--|--|--|--|--|--|--|--|--|--|--|--|--|--|--|--|--|--|--|--|--|--|--|--|--|--|--|--|--|--|--|--|--|--|--|--|--|--|--|--|--|--|--|--|--|--|--|--|--|--|--|--|--|--|--|--|--|--|--|--|--|--|--|--|--|--|--|--|--|--|--|--|--|--|--|--|--|--|--|--|--|--|--|--|--|--|--|--|--|--|--|--|--|--|--|--|--|--|--|--|--|--|--|--|--|--|--|--|--|--|--|--|--|--|--|--|--|--|--|--|--|--|--|--|--|--|--|--|--|--|--|--|--|--|--|--|--|--|--|--|--|--|--|--|--|--|--|--|--|--|--|--|--|--|--|--|--|--|--|--|--|--|--|--|--|--|--|--|--|--|--|--|--|--|--|--|--|--|--|--|--|--|--|--|--|--|--|--|--|--|--|--|--|--|--|--|--|--|--|--|--|--|--|--|--|--|--|--|--|--|--|--|--|--|--|--|--|--|--|--|--|--|--|--|--|--|--|--|--|--|--|--|--|--|--|--|--|--|--|--|--|--|--|--|--|--|--|--|--|--|--|--|--|--|--|--|--|--|--|--|--|--|--|--|--|--|--|--|--|--|--|--|--|--|--|--|--|--|--|--|--|--|--|--|--|--|--|--|--|--|--|--|--|--|--|--|--|--|--|--|--|--|--|--|--|--|--|--|--|--|--|--|--|--|--|--|--|--|--|--|--|--|--|--|--|--|--|--|--|--|--|--|--|--|--|--|--|--|--|--|--|--|--|--|--|--|--|--|--|--|--|--|--|--|--|--|--|--|--|--|--|--|--|--|--|--|--|--|--|--|--|--|--|--|--|--|--|--|--|--|--|--|--|--|--|--|--|--|--|--|--|--|--|--|--|--|--|--|--|--|--|--|--|--|--|--|--|--|--|--|--|--|--|--|--|--|--|--|--|--|--|--|--|--|--|--|--|--|--|--|--|--|--|--|--|--|--|--|--|--|--|--|--|--|--|--|--|--|--|--|--|--|--|--|--|--|--|--|--|--|--|--|--|--|--|--|--|--|--|--|--|--|--|--|--|--|--|--|--|--|--|--|--|--|--|--|--|--|--|--|--|--|--|--|--|--|--|--|--|--|--|--|--|--|--|--|--|--|--|--|--|--|--|--|--|--|--|--|--|--|--|--|--|--|--|--|--|--|--|--|--|--|--|--|--|--|--|--|--|--|--|--|--|--|--|--|--|--|--|--|--|--|--|--|--|--|--|--|--|--|--|--|--|--|--|--|--|--|--|--|--|--|--|--|--|--|--|--|--|--|--|--|--|--|--|--|--|--|--|--|--|--|--|--|--|--|--|--|--|--|--|--|--|--|--|--|--|--|--|--|--|--|--|--|--|--|--|--|--|--|--|--|--|--|--|--|--|--|--|--|--|--|--|--|--|--|--|--|--|--|--|--|--|--|--|--|--|--|--|--|--|--|--|--|--|--|--|--|--|--|--|--|--|--|--|--|--|--|--|--|--|--|--|--|--|--|--|--|--|--|--|--|--|--|--|--|--|--|--|--|--|--|--|--|--|--|--|--|--|--|--|--|--|--|--|--|--|--|--|--|--|--|--|--|--|--|--|--|--|--|--|--|--|--|--|--|--|--|--|--|--|--|--|--|--|--|--|--|--|--|--|--|--|--|--|--|--|--|--|--|--|--|--|--|--|--|--|--|--|--|--|--|--|--|--|--|--|--|--|--|--|--|--|--|--|--|--|--|--|--|--|--|--|--|--|--|--|--|--|--|--|--|--|--|--|--|--|--|--|--|--|--|--|--|--|--|--|--|--|--|--|--|--|--|--|--|--|--|--|--|--|--|--|--|--|--|--|--|--|--|--|--|--|--|--|--|--|--|--|--|--|--|--|--|--|--|--|--|--|--|--|--|--|--|--|--|--|--|--|--|--|--|--|--|--|--|--|--|--|--|--|--|--|--|--|--|--|--|--|--|--|--|--|--|--|--|--|--|--|--|--|--|--|--|--|--|--|--|--|--|--|--|--|--|--|--|--|--|--|--|--|--|--|--|--|--|--|--|--|--|--|--|--|--|--|--|--|--|--|--|--|--|--|--|--|--|--|--|--|--|--|--|--|--|--|--|--|--|--|--|--|--|--|--|--|--|--|--|--|--|--|--|--|--|--|--|--|--|--|--|--|--|--|--|--|--|--|--|--|--|--|--|--|--|--|--|--|--|--|--|--|--|--|--|--|--|--|--|--|--|--|--|--|--|--|--|--|--|--|--|--|--|--|--|--|--|--|--|--|--|--|--|--|--|--|--|--|--|--|--|--|--|--|--|--|--|--|--|--|--|--|--|--|--|--|--|--|--|--|--|--|--|--|--|--|--|--|--|--|--|--|--|--|--|--|--|--|--|--|--|--|--|--|--|--|--|--|--|--|--|--|--|--|--|--|--|--|--|--|--|--|--|--|--|--|--|--|--|--|--|--|--|--|--|--|--|--|--|--|--|--|--|--|--|--|--|--|--|--|--|--|--|--|--|--|--|--|--|--|--|--|--|--|--|--|--|--|--|--|--|--|--|--|--|--|--|--|--|--|--|--|--|--|--|--|--|--|--|--|--|--|--|--|--|--|--|--|--|--|--|--|--|--|--|--|--|--|--|--|--|--|--|--|--|--|--|--|--|--|--|--|--|--|--|--|--|--|--|--|--|--|--|--|--|--|--|--|--|--|--|--|--|--|--|--|--|--|--|--|--|--|--|--|--|--|--|--|--|--|--|--|--|--|--|--|--|--|--|--|--|--|--|--|--|--|--|--|--|--|--|--|--|--|--|--|--|--|--|--|--|--|--|--|--|--|--|--|--|--|--|--|--|--|--|--|--|--|--|--|--|--|--|--|--|--|--|--|--|--|--|--|--|--|--|--|--|--|--|--|--|--|--|--|--|--|--|--|--|--|--|--|--|--|--|--|--|--|--|--|--|--|--|--|--|--|--|--|--|--|--|--|--|--|--|--|--|--|--|--|--|--|--|--|--|--|--|--|--|--|--|--|--|--|--|--|--|--|--|--|--|--|--|--|--|--|--|--|--|--|--|--|--|--|--|--|--|--|--|--|--|--|--|--|--|--|--|--|--|--|--|--|--|--|--|--|--|--|--|--|--|--|--|--|--|--|--|--|--|--|--|--|--|--|--|--|--|--|--|--|--|--|--|--|--|--|--|--|--|--|--|--|--|--|--|--|--|--|--|--|--|--|--|--|--|--|--|--|--|--|--|--|--|--|--|--|--|--|--|--|--|--|--|--|--|--|--|--|--|--|--|--|--|--|--|--|--|--|--|--|--|--|--|--|--|--|--|--|--|--|--|--|--|--|--|--|--|--|--|--|--|--|--|--|--|--|--|--|--|--|--|--|--|--|--|--|--|--|--|--|--|--|--|--|--|--|--|--|--|--|--|--|--|--|--|--|--|--|--|--|--|--|--|--|--|--|--|--|--|--|--|--|--|--|--|--|--|--|--|--|--|--|--|--|--|--|--|--|--|--|--|--|--|--|--|--|--|--|--|--|--|--|--|--|--|--|--|--|--|--|--|--|--|--|--|--|--|--|--|--|--|--|--|--|--|--|--|--|--|--|--|--|--|--|--|--|--|--|--|--|--|--|--|--|--|--|--|--|--|--|--|--|--|--|--|--|--|--|--|--|--|--|--|--|--|--|--|--|--|--|--|--|--|--|--|--|--|--|--|--|--|--|--|--|--|--|--|--|--|--|--|--|--|--|--|--|--|--|--|--|--|--|--|--|--|--|--|--|--|--|--|--|--|--|--|--|--|--|--|--|--|--|--|--|--|--|--|--|--|--|--|--|--|--|--|--|--|--|--|--|--|--|--|--|--|--|--|--|--|--|--|--|--|--|--|--|--|--|--|--|--|--|--|--|--|--|--|--|--|--|--|--|--|--|--|--|--|--|--|--|--|--|--|--|--|--|--|--|--|--|--|--|--|--|--|--|--|--|--|--|--|--|--|--|--|--|--|--|--|--|--|--|--|--|--|--|--|--|--|--|--|--|--|--|--|--|--|--|--|--|--|--|--|--|--|--|--|--|--|--|--|--|--|--|--|--|--|--|--|--|--|--|--|--|--|--|--|--|--|--|--|--|--|--|--|--|--|--|--|--|--|--|--|--|--|--|--|--|--|--|--|--|--|--|--|--|--|--|--|--|--|--|--|--|--|--|--|--|--|--|--|--|--|--|--|--|--|--|--|--|--|--|--|--|--|--|--|--|--|--|--|--|--|--|--|--|--|--|--|--|--|--|--|--|--|--|--|--|--|--|--|--|--|--|--|--|--|--|--|--|--|--|--|--|--|--|--|--|--|--|--|--|--|--|--|--|--|--|--|--|--|--|--|--|--|--|--|--|--|--|--|--|--|--|--|--|--|--|--|--|--|--|--|--|--|--|--|--|--|--|--|--|--|--|--|--|--|--|--|--|--|--|--|--|--|--|--|--|--|--|--|--|--|--|--|--|--|--|--|--|--|--|--|--|--|--|--|--|--|--|--|--|--|--|--|--|--|--|--|--|--|--|--|--|--|--|--|--|--|--|--|--|--|--|--|--|--|--|--|--|--|--|--|--|--|--|--|--|--|--|--|--|--|--|--|--|--|--|--|--|--|--|--|--|--|--|--|--|--|--|--|--|--|--|--|--|--|--|--|--|--|--|--|--|--|--|--|--|--|--|--|--|--|--|--|--|--|--|--|--|--|--|--|--|--|--|--|--|--|--|--|--|--|--|--|--|--|--|--|--|--|--|--|--|--|--|--|--|--|--|--|--|--|--|--|--|--|--|--|--|--|--|--|--|--|--|--|--|--|--|--|--|--|--|--|--|--|--|--|--|--|--|--|--|--|--|--|--|--|--|--|--|--|--|--|--|--|--|--|--|--|--|--|--|--|--|--|--|--|--|--|--|--|--|--|--|--|--|--|--|--|--|--|--|--|--|--|--|--|--|--|--|--|--|--|--|--|--|--|--|--|--|--|--|--|--|--|--|--|--|--|--|--|--|--|--|--|--|--|--|--|--|--|--|--|--|--|--|--|--|--|--|--|--|--|--|--|--|--|--|--|--|--|--|--|--|--|--|--|--|--|--|--|--|--|--|--|--|--|--|--|--|--|--|--|--|--|--|--|--|--|--|--|--|--|--|--|--|--|--|--|--|--|--|--|--|--|--|--|--|--|--|--|--|--|--|--|--|--|--|--|--|--|--|--|--|--|--|--|--|--|--|--|--|--|--|--|--|--|--|--|--|--|--|--|--|--|--|--|--|--|--|--|--|--|--|--|--|--|--|--|--|--|--|--|--|--|--|--|--|--|--|--|--|--|--|--|--|--|--|--|--|--|--|--|--|--|--|--|--|--|--|--|--|--|--|--|--|--|--|--|--|--|--|--|--|--|--|--|--|--|--|--|--|--|--|--|--|--|--|--|--|--|--|--|--|--|--|--|--|--|--|--|--|--|--|--|--|--|--|--|--|--|--|--|--|--|--|--|--|--|--|--|--|--|--|--|--|--|--|--|--|--|--|--|--|--|--|--|--|--|--|--|--|--|--|--|--|--|--|--|--|--|--|--|--|--|--|--|--|--|--|--|--|--|--|--|--|--|--|--|--|--|--|--|--|--|--|--|--|--|--|--|--|--|--|--|--|--|--|--|--|--|--|--|--|--|--|--|--|--|--|--|--|--|--|--|--|--|--|--|--|--|--|--|--|--|--|--|--|--|--|--|--|--|--|--|--|--|--|--|--|--|--|--|--|--|--|--|--|--|--|--|--|--|--|--|--|--|--|--|--|--|--|--|--|--|--|--|--|--|--|--|--|--|--|--|--|--|--|--|--|--|--|--|--|--|--|--|--|--|--|--|--|--|--|--|--|--|--|--|--|--|--|--|--|--|--|--|--|--|--|--|--|--|--|--|--|--|--|--|--|--|--|--|--|--|--|--|--|--|--|--|--|--|--|--|--|--|--|--|--|--|--|--|--|--|--|--|--|--|--|--|--|--|--|--|--|--|--|--|--|--|--|--|--|--|--|--|--|--|--|--|--|--|--|--|--|--|--|--|--|--|--|--|--|--|--|--|--|--|--|--|--|--|--|--|--|--|--|--|--|--|--|--|--|--|--|--|--|--|--|--|--|--|--|--|--|--|--|--|--|--|--|--|--|--|--|--|--|--|--|--|--|--|--|--|--|--|--|--|--|--|--|--|--|--|--|--|--|--|--|--|--|--|--|--|--|--|--|--|--|--|--|--|--|--|--|--|--|--|--|--|--|--|--|--|--|--|--|--|--|--|--|--|--|--|--|--|--|--|--|--|--|--|--|--|--|--|--|--|--|--|--|--|--|--|--|--|--|--|--|--|--|--|--|--|--|--|--|--|--|--|--|--|--|--|--|--|--|--|--|--|--|--|--|--|--|--|--|--|--|--|--|--|--|--|--|--|--|--|--|--|--|--|--|--|--|--|--|--|--|--|--|--|--|--|--|--|--|--|--|--|--|--|--|--|--|--|--|--|--|--|--|--|--|--|--|--|--|--|--|--|--|--|--|--|--|--|--|--|--|--|--|--|--|--|--|--|--|--|--|--|--|--|--|--|--|--|--|--|--|--|--|--|--|--|--|--|--|--|--|--|--|--|--|--|--|--|--|--|--|--|--|--|--|--|--|--|--|--|--|--|--|--|--|--|--|--|--|--|--|--|--|--|--|--|--|--|--|--|--|--|--|--|--|--|--|--|--|--|--|--|--|--|--|--|--|--|--|--|--|--|--|--|--|--|--|--|--|--|--|--|--|--|--|--|--|--|--|--|--|--|--|--|--|--|--|--|--|--|--|--|--|--|--|--|--|--|--|--|--|--|--|--|--|--|--|--|--|--|--|--|--|--|--|--|--|--|--|--|--|--|--|--|--|--|--|--|--|--|--|--|--|--|--|--|--|--|--|--|--|--|--|--|--|--|--|--|--|--|--|--|--|--|--|--|--|--|--|--|--|--|--|--|--|--|--|--|--|--|--|--|--|--|--|--|--|--|--|--|--|--|--|--|--|--|--|--|--|--|--|--|--|--|--|--|--|--|--|--|--|--|--|--|--|--|--|--|--|--|--|--|--|--|--|--|--|--|--|--|--|--|--|--|--|--|--|--|--|--|--|--|--|--|--|--|--|--|--|--|--|--|--|--|--|--|--|--|--|--|--|--|--|--|--|--|--|--|--|--|--|--|--|--|--|--|--|--|--|--|--|--|--|--|--|--|--|--|--|--|--|--|--|--|--|--|--|--|--|--|--|--|--|--|--|--|--|--|--|--|--|--|--|--|--|--|--|--|--|--|--|--|--|--|--|--|--|--|--|--|--|--|--|--|--|--|--|--|--|--|--|--|--|--|--|--|--|--|--|--|--|--|--|--|--|--|--|--|--|--|--|--|--|--|--|--|--|--|--|--|--|--|--|--|--|--|--|--|--|--|--|--|--|--|--|--|--|--|--|--|--|--|--|--|--|--|--|--|--|--|--|--|--|--|--|--|--|--|--|--|--|--|--|--|--|--|--|--|--|--|--|--|--|--|--|--|--|--|--|--|--|--|--|--|--|--|--|--|--|--|--|--|--|--|--|--|--|--|--|--|--|--|--|--|--|--|--|--|--|--|--|--|--|--|--|--|--|--|--|--|--|--|--|--|--|--|--|--|--|--|--|--|--|--|--|--|--|--|--|--|--|--|--|--|--|--|--|--|--|--|--|--|--|--|--|--|--|--|--|--|--|--|--|--|--|--|--|--|--|--|--|--|--|--|--|--|--|--|--|--|--|--|--|--|--|--|--|--|--|--|--|--|--|--|--|--|--|--|--|--|--|--|--|--|--|--|--|--|--|--|--|--|--|--|--|--|--|--|--|--|--|--|--|--|--|--|--|--|--|--|--|--|--|--|--|--|--|--|--|--|--|--|--|--|--|--|--|--|--|--|--|--|--|--|--|--|--|--|--|--|--|--|--|--|--|--|--|--|--|--|--|--|--|--|--|--|--|--|--|--|--|--|--|--|--|--|--|--|--|--|--|--|--|--|--|--|--|--|--|--|--|--|--|--|--|--|--|--|--|--|--|--|--|--|--|--|--|--|--|--|--|--|--|--|--|--|--|--|--|--|--|--|--|--|--|--|--|--|--|--|--|--|--|--|--|--|--|--|--|--|--|--|--|--|--|--|--|--|--|--|--|--|--|--|--|--|--|--|--|--|--|--|--|--|--|--|--|--|--|--|--|--|--|--|--|--|--|--|--|--|--|--|--|--|--|--|--|--|--|--|--|--|--|--|--|--|--|--|--|--|--|--|--|--|--|--|--|--|--|--|--|--|--|--|--|--|--|--|--|--|--|--|--|--|--|--|--|--|--|--|--|--|--|--|--|--|--|--|--|--|--|--|--|--|--|--|--|--|--|--|--|--|--|--|--|--|--|--|--|--|--|--|--|--|--|--|--|--|--|--|--|--|--|--|--|--|--|--|--|--|--|--|--|--|--|--|--|--|--|--|--|--|--|--|--|--|--|--|--|--|--|--|--|--|--|--|--|--|--|--|--|--|--|--|--|--|--|--|--|--|--|--|--|--|--|--|--|--|--|--|--|--|--|--|--|--|--|--|--|--|--|--|--|--|--|--|--|--|--|--|--|--|--|--|--|--|--|--|--|--|--|--|--|--|--|--|--|--|--|--|--|--|--|--|--|--|--|--|--|--|--|--|--|--|--|--|--|--|--|--|--|--|--|--|--|--|--|--|--|--|--|--|--|--|--|--|--|--|--|--|--|--|--|--|--|--|--|--|--|--|--|--|--|--|--|--|--|--|--|--|--|--|--|--|--|--|--|--|--|--|--|--|--|--|--|--|--|--|--|--|--|--|--|--|--|--|--|--|--|--|--|--|--|--|--|--|--|--|--|--|--|--|--|--|--|--|--|--|--|--|--|--|--|--|--|--|--|--|--|--|--|--|--|--|--|--|--|--|--|--|--|--|--|--|--|--|--|--|--|--|--|--|--|--|--|--|--|--|--|--|--|--|--|--|--|--|--|--|--|--|--|--|--|--|--|--|--|--|--|--|--|--|--|--|--|--|--|--|--|--|--|--|--|--|--|--|--|--|--|--|--|--|--|--|--|--|--|--|--|--|--|--|--|--|--|--|--|--|--|--|--|--|--|--|--|--|--|--|--|--|--|--|--|--|--|--|--|--|--|--|--|--|--|--|--|--|--|--|--|--|--|--|--|--|--|--|--|--|--|--|--|--|--|--|--|--|--|--|--|--|--|--|--|--|--|--|--|--|--|--|--|--|--|--|--|--|--|--|--|--|--|--|--|--|--|--|--|--|--|--|--|--|--|--|--|--|--|--|--|--|--|--|--|--|--|--|--|--|--|--|--|--|--|--|--|--|--|--|--|--|--|--|--|--|--|--|--|--|--|--|--|--|--|--|--|--|--|--|--|--|--|--|--|--|--|--|--|--|--|--|--|--|--|--|--|--|--|--|--|--|--|--|--|--|--|--|--|--|--|--|--|--|--|--|--|--|--|--|--|--|--|--|--|--|--|--|--|--|--|--|--|--|--|--|--|--|--|--|--|--|--|--|--|--|--|--|--|--|--|--|--|--|--|--|--|--|--|--|--|--|--|--|--|--|--|--|--|--|--|--|--|--|--|--|--|--|--|--|--|--|--|--|--|--|--|--|--|--|--|--|--|--|--|--|--|--|--|--|--|--|--|--|--|--|--|--|--|--|--|--|--|--|--|--|--|--|--|--|--|--|--|--|--|--|--|--|--|--|--|--|--|--|--|--|--|--|--|--|--|--|--|--|--|--|--|--|--|--|--|--|--|--|--|--|--|--|--|--|--|--|--|--|--|--|--|--|--|--|--|--|--|--|--|--|--|--|--|--|--|--|--|--|--|--|--|--|--|--|--|--|--|--|--|--|--|--|--|--|--|--|--|--|--|--|--|--|--|--|--|--|--|--|--|--|--|--|--|--|--|--|--|--|--|--|--|--|--|--|--|--|--|--|--|--|--|--|--|--|--|--|--|--|--|--|--|--|--|--|--|--|--|--|--|--|--|--|--|--|--|--|--|--|--|--|--|--|--|--|--|--|--|--|--|--|--|--|--|--|--|--|--|--|--|--|--|--|--|--|--|--|--|--|--|--|--|--|--|--|--|--|--|--|--|--|--|--|--|--|--|--|--|--|--|--|--|--|--|--|--|--|--|--|--|--|--|--|--|--|--|--|--|--|--|--|--|--|--|--|--|--|--|--|--|--|--|--|--|--|--|--|--|--|--|--|--|--|--|--|--|--|--|--|--|--|--|--|--|--|--|--|--|--|--|--|--|--|--|--|--|--|--|--|--|--|--|--|--|--|--|--|--|--|--|--|--|--|--|--|--|--|--|--|--|--|--|--|--|--|--|--|--|--|--|--|--|--|--|--|--|--|--|--|--|--|--|--|--|--|--|--|--|--|--|--|--|--|--|--|--|--|--|--|--|--|--|--|--|--|--|--|--|--|--|--|--|--|--|--|--|--|--|--|--|--|--|--|--|--|--|--|--|--|--|--|--|--|--|--|--|--|--|--|--|--|--|--|--|--|--|--|--|--|--|--|--|--|--|--|--|--|--|--|--|--|--|--|--|--|--|--|--|--|--|--|--|--|--|--|--|--|--|--|--|--|--|--|--|--|--|--|--|--|--|--|--|--|--|--|--|--|--|--|--|--|--|--|--|--|--|--|--|--|--|--|--|--|--|--|--|--|--|--|--|--|--|--|--|--|--|--|--|--|--|--|--|--|--|--|--|--|--|--|--|--|--|--|--|--|--|--|--|--|--|--|--|--|--|--|--|--|--|--|--|--|--|--|--|--|--|--|--|--|--|--|--|--|--|--|--|--|--|--|--|--|--|--|--|--|--|--|--|--|--|--|--|--|--|--|--|--|--|--|--|--|--|--|--|--|--|--|--|--|--|--|--|--|--|--|--|--|--|--|--|--|--|--|--|--|--|--|--|--|--|--|--|--|--|--|--|--|--|--|--|--|--|--|--|--|--|--|--|--|--|--|--|--|--|--|--|--|--|--|--|--|--|--|--|--|--|--|--|--|--|--|--|--|--|--|--|--|--|--|--|--|--|--|--|--|--|--|--|--|--|--|--|--|--|--|--|--|--|--|--|--|--|--|--|--|--|--|--|--|--|--|--|--|--|--|--|--|--|--|--|--|--|--|--|--|--|--|--|--|--|--|--|--|--|--|--|--|--|--|--|--|--|--|--|--|--|--|--|--|--|--|--|--|--|--|--|--|--|--|--|--|--|--|--|--|--|--|--|--|--|--|--|--|--|--|--|--|--|--|--|--|--|--|--|--|--|--|--|--|--|--|--|--|--|--|--|--|--|--|--|--|--|--|--|--|--|--|--|--|--|--|--|--|--|--|--|--|--|--|--|--|--|--|--|--|--|--|--|--|--|--|--|--|--|--|--|--|--|--|--|--|--|--|--|--|--|--|--|--|--|--|--|--|--|--|--|--|--|--|--|--|--|--|--|--|--|--|--|--|--|--|--|--|--|--|--|--|--|--|--|--|--|--|--|--|--|--|--|--|--|--|--|--|--|--|--|--|--|--|--|--|--|--|--|--|--|--|--|--|--|--|--|--|--|--|--|--|--|--|--|--|--|--|--|--|--|--|--|--|--|--|--|--|--|--|--|--|--|--|--|--|--|--|--|--|--|--|--|--|--|--|--|--|--|--|--|--|--|--|--|--|--|--|--|--|--|--|--|--|--|--|--|--|--|--|--|--|--|--|--|--|--|--|--|--|--|--|--|--|--|--|--|--|--|--|--|--|--|--|--|--|--|--|--|--|--|--|--|--|--|--|--|--|--|--|--|--|--|--|--|--|--|--|--|--|--|--|--|--|--|--|--|--|--|--|--|--|--|--|--|--|--|--|--|--|--|--|--|--|--|--|--|--|--|--|--|--|--|--|--|--|--|--|--|--|--|--|--|--|--|--|--|--|--|--|--|--|--|--|--|--|--|--|--|--|--|--|--|--|--|--|--|--|--|--|--|--|--|--|--|--|--|--|--|--|--|--|--|--|--|--|--|--|--|--|--|--|--|--|--|--|--|--|--|--|--|--|--|--|--|--|--|--|--|--|--|--|--|--|--|--|--|--|--|--|--|--|--|--|--|--|--|--|--|--|--|--|--|--|--|--|--|--|--|--|--|--|--|--|--|--|--|--|--|--|--|--|--|--|--|--|--|--|--|--|--|--|--|--|--|--|--|--|--|--|--|--|--|--|--|--|--|--|--|--|--|--|--|--|--|--|--|--|--|--|--|--|--|--|--|--|--|--|--|--|--|--|--|--|--|--|--|--|--|--|--|--|--|--|--|--|--|--|--|--|--|--|--|--|--|--|--|--|--|--|--|--|--|--|--|--|--|--|--|--|--|--|--|--|--|--|--|--|--|--|--|--|--|--|--|--|--|--|--|--|--|--|--|--|--|--|--|--|--|--|--|--|--|--|--|--|--|--|--|--|--|--|--|--|--|--|--|--|--|--|--|--|--|--|--|--|--|--|--|--|--|--|--|--|--|--|--|--|--|--|--|--|--|--|--|--|--|--|--|--|--|--|--|--|--|--|--|--|--|--|--|--|--|--|--|--|--|--|--|--|--|--|--|--|--|--|--|--|--|--|--|--|--|--|--|--|--|--|--|--|--|--|--|--|--|--|--|--|--|--|--|--|--|--|--|--|--|--|--|--|--|--|--|--|--|--|--|--|--|--|--|--|--|--|--|--|--|--|--|--|--|--|--|--|--|--|--|--|--|--|--|--|--|--|--|--|--|--|--|--|--|--|--|--|--|--|--|--|--|--|--|--|--|--|--|--|--|--|--|--|--|--|--|--|--|--|--|--|--|--|--|--|--|--|--|--|--|--|--|--|--|--|--|--|--|--|--|--|--|--|--|--|--|--|--|--|--|--|--|--|--|--|--|--|--|--|--|--|--|--|--|--|--|--|--|--|--|--|--|--|--|--|--|--|--|--|--|--|--|--|--|--|--|--|--|--|--|--|--|--|--|--|--|--|--|--|--|--|--|--|--|--|--|--|--|--|--|--|--|--|--|--|--|--|--|--|--|--|--|--|--|--|--|--|--|--|--|--|--|--|--|--|--|--|--|--|--|--|--|--|--|--|--|--|--|--|--|--|--|--|--|--|--|--|--|--|--|--|--|--|--|--|--|--|--|--|--|--|--|--|--|--|--|--|--|--|--|--|--|--|--|--|--|--|--|--|--|--|--|--|--|--|--|--|--|--|--|--|--|--|--|--|--|--|--|--|--|--|--|--|--|--|--|--|--|--|--|--|--|--|--|--|--|--|--|--|--|--|--|--|--|--|--|--|--|--|--|--|--|--|--|--|--|--|--|--|--|--|--|--|--|--|--|--|--|--|--|--|--|--|--|--|--|--|--|--|--|--|--|--|--|--|--|--|--|--|--|--|--|--|--|--|--|--|--|--|--|--|--|--|--|--|--|--|--|--|--|--|--|--|--|--|--|--|--|--|--|--|--|--|--|--|--|--|--|--|--|--|--|--|--|--|--|--|--|--|--|--|--|--|--|--|--|--|--|--|--|--|--|--|--|--|--|--|--|--|--|--|--|--|--|--|--|--|--|--|--|--|--|--|--|--|--|--|--|--|--|--|--|--|--|--|--|--|--|--|--|--|--|--|--|--|--|--|--|--|--|--|--|--|--|--|--|--|--|--|--|--|--|--|--|--|--|--|--|--|--|--|--|--|--|--|--|--|--|--|--|--|--|--|--|--|--|--|--|--|--|--|--|--|--|--|--|--|--|--|--|--|--|--|--|--|--|--|--|--|--|--|--|--|--|--|--|--|--|--|--|--|--|--|--|--|--|--|--|--|--|--|--|--|--|--|--|--|--|--|--|--|--|--|--|--|--|--|--|--|--|--|--|--|--|--|--|--|--|--|--|--|--|--|--|--|--|--|--|--|--|--|--|--|--|--|--|--|--|--|--|--|--|--|--|--|--|--|--|--|--|--|--|--|--|--|--|--|--|--|--|--|--|--|--|--|--|--|--|--|--|--|--|--|--|--|--|--|--|--|--|--|--|--|--|--|--|--|--|--|--|--|--|--|--|--|--|--|--|--|--|--|--|--|--|--|--|--|--|--|--|--|--|--|--|--|--|--|--|--|--|--|--|--|--|--|--|--|--|--|--|--|--|--|--|--|--|--|--|--|--|--|--|--|--|--|--|--|--|--|--|--|--|--|--|--|--|--|--|--|--|--|--|--|--|--|--|--|--|--|--|--|--|--|--|--|--|--|--|--|--|--|--|--|--|--|--|--|--|--|--|--|--|--|--|--|--|--|--|--|--|--|--|--|--|--|--|--|--|--|--|--|--|--|--|--|--|--|--|--|--|--|--|--|--|--|--|--|--|--|--|--|--|--|--|--|--|--|--|--|--|--|--|--|--|--|--|--|--|--|--|--|--|--|--|--|--|--|--|--|--|--|--|--|--|--|--|--|--|--|--|--|--|--|--|--|--|--|--|--|--|--|--|--|--|--|--|--|--|--|--|--|--|--|--|--|--|--|--|--|--|--|--|--|--|--|--|--|--|--|--|--|--|--|--|--|--|--|--|--|--|--|--|--|--|--|--|--|--|--|--|--|--|--|--|--|--|--|--|--|--|--|--|--|--|--|--|--|--|--|--|--|--|--|--|--|--|--|--|--|--|--|--|--|--|--|--|--|--|--|--|--|--|--|--|--|--|--|--|--|--|--|--|--|--|--|--|--|--|--|--|--|--|--|--|--|--|--|--|--|--|--|--|--|--|--|--|--|--|--|--|--|--|--|--|--|--|--|--|--|--|--|--|--|--|--|--|--|--|--|--|--|--|--|--|--|--|--|--|--|--|--|--|--|--|--|--|--|--|--|--|--|--|--|--|--|--|--|--|--|--|--|--|--|--|--|--|--|--|--|--|--|--|--|--|--|--|--|--|--|--|--|--|--|--|--|--|--|--|--|--|--|--|--|--|--|--|--|--|--|--|--|--|--|--|--|--|--|--|--|--|--|--|--|--|--|--|--|--|--|--|--|--|--|--|--|--|--|--|--|--|--|--|--|--|--|--|--|--|--|--|--|--|--|--|--|--|--|--|--|--|--|--|--|--|--|--|--|--|--|--|--|--|--|--|--|--|--|--|--|--|--|--|--|--|--|--|--|--|--|--|--|--|--|--|--|--|--|--|--|--|--|--|--|--|--|--|--|--|--|--|--|--|--|--|--|--|--|--|--|--|--|--|--|--|--|--|--|--|--|--|--|--|--|--|--|--|--|--|--|--|--|--|--|--|--|--|--|--|--|--|--|--|--|--|--|--|--|--|--|--|--|--|--|--|--|--|--|--|--|--|--|--|--|--|--|--|--|--|--|--|--|--|--|--|--|--|--|--|--|--|--|--|--|--|--|--|--|--|--|--|--|--|--|--|--|--|--|--|--|--|--|--|--|--|--|--|--|--|--|--|--|--|--|--|--|--|--|--|--|--|--|--|--|--|--|--|--|--|--|--|--|--|--|--|--|--|--|--|--|--|--|--|--|--|--|--|--|--|--|--|--|--|--|--|--|--|--|--|--|--|--|--|--|--|--|--|--|--|--|--|--|--|--|--|--|--|--|--|--|--|--|--|--|--|--|--|--|--|--|--|--|--|--|--|--|--|--|--|--|--|--|--|--|--|--|--|--|--|--|--|--|--|--|--|--|--|--|--|--|--|--|--|--|--|--|--|--|--|--|--|--|--|--|--|--|--|--|--|--|--|--|--|--|--|--|--|--|--|--|--|--|--|--|--|--|--|--|--|--|--|--|--|--|--|--|--|--|--|--|--|--|--|--|--|--|--|--|--|--|--|--|--|--|--|--|--|--|--|--|--|--|--|--|--|--|--|--|--|--|--|--|--|--|--|--|--|--|--|--|--|--|--|--|--|--|--|--|--|--|--|--|--|--|--|--|--|--|--|--|--|--|--|--|--|--|--|--|--|--|--|--|--|--|--|--|--|--|--|--|--|--|--|--|--|--|--|--|--|--|--|--|--|--|--|--|--|--|--|--|--|--|--|--|--|--|--|--|--|--|--|--|--|--|--|--|--|--|--|--|--|--|--|--|--|--|--|--|--|--|--|--|--|--|--|--|--|--|--|--|--|--|--|--|--|--|--|--|--|--|--|--|--|--|--|--|--|--|--|--|--|--|--|--|--|--|--|--|--|--|--|--|--|--|--|--|--|--|--|--|--|--|--|--|--|--|--|--|--|--|--|--|--|--|--|--|--|--|--|--|--|--|--|--|--|--|--|--|--|--|--|--|--|--|--|--|--|--|--|--|--|--|--|--|--|--|--|--|--|--|--|--|--|--|--|--|--|--|--|--|--|--|--|--|--|--|--|--|--|--|--|--|--|--|--|--|--|--|--|--|--|--|--|--|--|--|--|--|--|--|--|--|--|--|--|--|--|--|--|--|--|--|--|--|--|--|--|--|--|--|--|--|--|--|--|--|--|--|--|--|--|--|--|--|--|--|--|--|--|--|--|--|--|--|--|--|--|--|--|--|--|--|--|--|--|--|--|--|--|--|--|--|--|--|--|--|--|--|--|--|--|--|--|--|--|--|--|--|--|--|--|--|--|--|--|--|--|--|--|--|--|--|--|--|--|--|--|--|--|--|--|--|--|--|--|--|--|--|--|--|--|--|--|--|--|--|--|--|--|--|--|--|--|--|--|--|--|--|--|--|--|--|--|--|--|--|--|--|--|--|--|--|--|--|--|--|--|--|--|--|--|--|--|--|--|--|--|--|--|--|--|--|--|--|--|--|--|--|--|--|--|--|--|--|--|--|--|--|--|--|--|--|--|--|--|--|--|--|--|--|--|--|--|--|--|--|--|--|--|--|--|--|--|--|--|--|--|--|--|--|--|--|--|--|--|--|--|--|--|--|--|--|--|--|--|--|--|--|--|--|--|--|--|--|--|--|--|--|--|--|--|--|--|--|--|--|--|--|--|--|--|--|--|--|--|--|--|--|--|--|--|--|--|--|--|--|--|--|--|--|--|--|--|--|--|--|--|--|--|--|--|--|--|--|--|--|--|--|--|--|--|--|--|--|--|--|--|--|--|--|--|--|--|--|--|--|--|--|--|--|--|--|--|--|--|--|--|--|--|--|--|--|--|--|--|--|--|--|--|--|--|--|--|--|--|--|--|--|--|--|--|--|--|--|--|--|--|--|--|--|--|--|--|--|--|--|--|--|--|--|--|--|--|--|--|--|--|--|--|--|--|--|--|--|--|--|--|--|--|--|--|--|--|--|--|--|--|--|--|--|--|--|--|--|--|--|--|--|--|--|--|--|--|--|--|--|--|--|--|--|--|--|--|--|--|--|--|--|--|--|--|--|--|--|--|--|
| 5'     | gagccucucuaaaaggggagauuguguaaaagggaaa                                                        |  |  |  |  |  |  |  |  |      |  |  |  |  |  |  |  |  |  |  | ggugugucucugcucucuggc |  |  |  |  |  |  |  |  |  |  |  |  |  |  |  |  |  |  |  | caggggaaccgau |  |  |  |  |  |  |  |  |  |  |  |  |  |  |  |  |  |  |  | gagcagca |  |  |  |  |  |  |  |  |  |  |  |  |  |  |  |  |  |  |  | caagugagcaagggcca |  |  |  |  |  |  |  |  |  |  |  |  |  |  |  |  |  |  |  | augga |  |  |  |  |  |  |  |  |  |  |  |  |  |  |  |  |  |  |  | cuuggcgacagcauuu |  |  |  |  |  |  |  |  |  |  |  |  |  |  |  |  |  |  |  | gcguc |  |  |  |  |  |  |  |  |  |  |  |  |  |  |  |  |  |  |  | -3' | obs |  |  |  |  |  |  |  |  |  |  |  |  |  |  |  |  |  |  |  |  |  |  |  |  |  |  |  |  |  |  |  |  |  |  |  |  |  |  |  |  |  |  |  |  |  |  |  |  |  |  |  |  |  |  |  |  |  |  |  |  |  |  |  |  |  |  |  |  |  |  |  |  |  |  |  |  |  |  |  |  |  |  |  |  |  |  |  |  |  |  |  |  |  |  |  |  |  |  |  |  |  |  |  |  |  |  |  |  |  |  |  |  |  |  |  |  |  |  |  |  |  |  |  |  |  |  |  |  |  |  |  |  |  |  |  |  |  |  |  |  |  |  |  |  |  |  |  |  |  |  |  |  |  |  |  |  |  |  |  |  |  |  |  |  |  |  |  |  |  |  |  |  |  |  |  |  |  |  |  |  |  |  |  |  |  |  |  |  |  |  |  |  |  |  |  |  |  |  |  |  |  |  |  |  |  |  |  |  |  |  |  |  |  |  |  |  |  |  |  |  |  |  |  |  |  |  |  |  |  |  |  |  |  |  |  |  |  |  |  |  |  |  |  |  |  |  |  |  |  |  |  |  |  |  |  |  |  |  |  |  |  |  |  |  |  |  |  |  |  |  |  |  |  |  |  |  |  |  |  |  |  |  |  |  |  |  |  |  |  |  |  |  |  |  |  |  |  |  |  |  |  |  |  |  |  |  |  |  |  |  |  |  |  |  |  |  |  |  |  |  |  |  |  |  |  |  |  |  |  |  |  |  |  |  |  |  |  |  |  |  |  |  |  |  |  |  |  |  |  |  |  |  |  |  |  |  |  |  |  |  |  |  |  |  |  |  |  |  |  |  |  |  |  |  |  |  |  |  |  |  |  |  |  |  |  |  |  |  |  |  |  |  |  |  |  |  |  |  |  |  |  |  |  |  |  |  |  |  |  |  |  |  |  |  |  |  |  |  |  |  |  |  |  |  |  |  |  |  |  |  |  |  |  |  |  |  |  |  |  |  |  |  |  |  |  |  |  |  |  |  |  |  |  |  |  |  |  |  |  |  |  |  |  |  |  |  |  |  |  |  |  |  |  |  |  |  |  |  |  |  |  |  |  |  |  |  |  |  |  |  |  |  |  |  |  |  |  |  |  |  |  |  |  |  |  |  |  |  |  |  |  |  |  |  |  |  |  |  |  |  |  |  |  |  |  |  |  |  |  |  |  |  |  |  |  |  |  |  |  |  |  |  |  |  |  |  |  |  |  |  |  |  |  |  |  |  |  |  |  |  |  |  |  |  |  |  |  |  |  |  |  |  |  |  |  |  |  |  |  |  |  |  |  |  |  |  |  |  |  |  |  |  |  |  |  |  |  |  |  |  |  |  |  |  |  |  |  |  |  |  |  |  |  |  |  |  |  |  |  |  |  |  |  |  |  |  |  |  |  |  |  |  |  |  |  |  |  |  |  |  |  |  |  |  |  |  |  |  |  |  |  |  |  |  |  |  |  |  |  |  |  |  |  |  |  |  |  |  |  |  |  |  |  |  |  |  |  |  |  |  |  |  |  |  |  |  |  |  |  |  |  |  |  |  |  |  |  |  |  |  |  |  |  |  |  |  |  |  |  |  |  |  |  |  |  |  |  |  |  |  |  |  |  |  |  |  |  |  |  |  |  |  |  |  |  |  |  |  |  |  |  |  |  |  |  |  |  |  |  |  |  |  |  |  |  |  |  |  |  |  |  |  |  |  |  |  |  |  |  |  |  |  |  |  |  |  |  |  |  |  |  |  |  |  |  |  |  |  |  |  |  |  |  |  |  |  |  |  |  |  |  |  |  |  |  |  |  |  |  |  |  |  |  |  |  |  |  |  |  |  |  |  |  |  |  |  |  |  |  |  |  |  |  |  |  |  |  |  |  |  |  |  |  |  |  |  |  |  |  |  |  |  |  |  |  |  |  |  |  |  |  |  |  |  |  |  |  |  |  |  |  |  |  |  |  |  |  |  |  |  |  |  |  |  |  |  |  |  |  |  |  |  |  |  |  |  |  |  |  |  |  |  |  |  |  |  |  |  |  |  |  |  |  |  |  |  |  |  |  |  |  |  |  |  |  |  |  |  |  |  |  |  |  |  |  |  |  |  |  |  |  |  |  |  |  |  |  |  |  |  |  |  |  |  |  |  |  |  |  |  |  |  |  |  |  |  |  |  |  |  |  |  |  |  |  |  |  |  |  |  |  |  |  |  |  |  |  |  |  |  |  |  |  |  |  |  |  |  |  |  |  |  |  |  |  |  |  |  |  |  |  |  |  |  |  |  |  |  |  |  |  |  |  |  |  |  |  |  |  |  |  |  |  |  |  |  |  |  |  |  |  |  |  |  |  |  |  |  |  |  |  |  |  |  |  |  |  |  |  |  |  |  |  |  |  |  |  |  |  |  |  |  |  |  |  |  |  |  |  |  |  |  |  |  |  |  |  |  |  |  |  |  |  |  |  |  |  |  |  |  |  |  |  |  |  |  |  |  |  |  |  |  |  |  |  |  |  |  |  |  |  |  |  |  |  |  |  |  |  |  |  |  |  |  |  |  |  |  |  |  |  |  |  |  |  |  |  |  |  |  |  |  |  |  |  |  |  |  |  |  |  |  |  |  |  |  |  |  |  |  |  |  |  |  |  |  |  |  |  |  |  |  |  |  |  |  |  |  |  |  |  |  |  |  |  |  |  |  |  |  |  |  |  |  |  |  |  |  |  |  |  |  |  |  |  |  |  |  |  |  |  |  |  |  |  |  |  |  |  |  |  |  |  |  |  |  |  |  |  |  |  |  |  |  |  |  |  |  |  |  |  |  |  |  |  |  |  |  |  |  |  |  |  |  |  |  |  |  |  |  |  |  |  |  |  |  |  |  |  |  |  |  |  |  |  |  |  |  |  |  |  |  |  |  |  |  |  |  |  |  |  |  |  |  |  |  |  |  |  |  |  |  |  |  |  |  |  |  |  |  |  |  |  |  |  |  |  |  |  |  |  |  |  |  |  |  |  |  |  |  |  |  |  |  |  |  |  |  |  |  |  |  |  |  |  |  |  |  |  |  |  |  |  |  |  |  |  |  |  |  |  |  |  |  |  |  |  |  |  |  |  |  |  |  |  |  |  |  |  |  |  |  |  |  |  |  |  |  |  |  |  |  |  |  |  |  |  |  |  |  |  |  |  |  |  |  |  |  |  |  |  |  |  |  |  |  |  |  |  |  |  |  |  |  |  |  |  |  |  |  |  |  |  |  |  |  |  |  |  |  |  |  |  |  |  |  |  |  |  |  |  |  |  |  |  |  |  |  |  |  |  |  |  |  |  |  |  |  |  |  |  |  |  |  |  |  |  |  |  |  |  |  |  |  |  |  |  |  |  |  |  |  |  |  |  |  |  |  |  |  |  |  |  |  |  |  |  |  |  |  |  |  |  |  |  |  |  |  |  |  |  |  |  |  |  |  |  |  |  |  |  |  |  |  |  |  |  |  |  |  |  |  |  |  |  |  |  |  |  |  |  |  |  |  |  |  |  |  |  |  |  |  |  |  |  |  |  |  |  |  |  |  |  |  |  |  |  |  |  |  |  |  |  |  |  |  |  |  |  |  |  |  |  |  |  |  |  |  |  |  |  |  |  |  |  |  |  |  |  |  |  |  |  |  |  |  |  |  |  |  |  |  |  |  |  |  |  |  |  |  |  |  |  |  |  |  |  |  |  |  |  |  |  |  |  |  |  |  |  |  |  |  |  |  |  |  |  |  |  |  |  |  |  |  |  |  |  |  |  |  |  |  |  |  |  |  |  |  |  |  |  |  |  |  |  |  |  |  |  |  |  |  |  |  |  |  |  |  |  |  |  |  |  |  |  |  |  |  |  |  |  |  |  |  |  |  |  |  |  |  |  |  |  |  |  |  |  |  |  |  |  |  |  |  |  |  |  |  |  |  |  |  |  |  |  |  |  |  |  |  |  |  |  |  |  |  |  |  |  |  |  |  |  |  |  |  |  |  |  |  |  |  |  |  |  |  |  |  |  |  |  |  |  |  |  |  |  |  |  |  |  |  |  |  |  |  |  |  |  |  |  |  |  |  |  |  |  |  |  |  |  |  |  |  |  |  |  |  |  |  |  |  |  |  |  |  |  |  |  |  |  |  |  |  |  |  |  |  |  |  |  |  |  |  |  |  |  |  |  |  |  |  |  |  |  |  |  |  |  |  |  |  |  |  |  |  |  |  |  |  |  |  |  |  |  |  |  |  |  |  |  |  |  |  |  |  |  |  |  |  |  |  |  |  |  |  |  |  |  |  |  |  |  |  |  |  |  |  |  |  |  |  |  |  |  |  |  |  |  |  |  |  |  |  |  |  |  |  |  |  |  |  |  |  |  |  |  |  |  |  |  |  |  |  |  |  |  |  |  |  |  |  |  |  |  |  |  |  |  |  |  |  |  |  |  |  |  |  |  |  |  |  |  |  |  |  |  |  |  |  |  |  |  |  |  |  |  |  |  |  |  |  |  |  |  |  |  |  |  |  |  |  |  |  |  |  |  |  |  |  |  |  |  |  |  |  |  |  |  |  |  |  |  |  |  |  |  |  |  |  |  |  |  |  |  |  |  |  |  |  |  |  |  |  |  |  |  |  |  |  |  |  |  |  |  |  |  |  |  |  |  |  |  |  |  |  |  |  |  |  |  |  |  |  |  |  |  |  |  |  |  |  |  |  |  |  |  |  |  |  |  |  |  |  |  |  |  |  |  |  |  |  |  |  |  |  |  |  |  |  |  |  |  |  |  |  |  |  |  |  |  |  |  |  |  |  |  |  |  |  |  |  |  |  |  |  |  |  |  |  |  |  |  |  |  |  |  |  |  |  |  |  |  |  |  |  |  |  |  |  |  |  |  |  |  |  |  |  |  |  |  |  |  |  |  |  |  |  |  |  |  |  |  |  |  |  |  |  |  |  |  |  |  |  |  |  |  |  |  |  |  |  |  |  |  |  |  |  |  |  |  |  |  |  |  |  |  |  |  |  |  |  |  |  |  |  |  |  |  |  |  |  |  |  |  |  |  |  |  |  |  |  |  |  |  |  |  |  |  |  |  |  |  |  |  |  |  |  |  |  |  |  |  |  |  |  |  |  |  |  |  |  |  |  |  |  |  |  |  |  |  |  |  |  |  |  |  |  |  |  |  |  |  |  |  |  |  |  |  |  |  |  |  |  |  |  |  |  |  |  |  |  |  |  |  |  |  |  |  |  |  |  |  |  |  |  |  |  |  |  |  |  |  |  |  |  |  |  |  |  |  |  |  |  |  |  |  |  |  |  |  |  |  |  |  |  |  |  |  |  |  |  |  |  |  |  |  |  |  |  |  |  |  |  |  |  |  |  |  |  |  |  |  |  |  |  |  |  |  |  |  |  |  |  |  |  |  |  |  |  |  |  |  |  |  |  |  |  |  |  |  |  |  |  |  |  |  |  |  |  |  |  |  |  |  |  |  |  |  |  |  |  |  |  |  |  |  |  |  |  |  |  |  |  |  |  |  |  |  |  |  |  |  |  |  |  |  |  |  |  |  |  |  |  |  |  |  |  |  |  |  |  |  |  |  |  |  |  |  |  |  |  |  |  |  |  |  |  |  |  |  |  |  |  |  |  |  |  |  |  |  |  |  |  |  |  |  |  |  |  |  |  |  |  |  |  |  |  |  |  |  |  |  |  |  |  |  |  |  |  |  |  |  |  |  |  |  |  |  |  |  |  |  |  |  |  |  |  |  |  |  |  |  |  |  |  |  |  |  |  |  |  |  |  |  |  |  |  |  |  |  |  |  |  |  |  |  |  |  |  |  |  |  |  |  |  |  |  |  |  |  |  |  |  |  |  |  |  |  |  |  |  |  |  |  |  |  |  |  |  |  |  |  |  |  |  |  |  |  |  |  |  |  |  |  |  |  |  |  |  |  |  |  |  |  |  |  |  |  |  |  |  |  |  |  |  |  |  |  |  |  |  |  |  |  |  |  |  |  |  |  |  |  |  |  |  |  |  |  |  |  |  |  |  |  |  |  |  |  |  |  |  |  |  |  |  |  |  |  |  |  |  |  |  |  |  |  |  |  |  |  |  |  |  |  |  |  |  |  |  |  |  |  |  |  |  |  |  |  |  |  |  |  |  |  |  |  |  |  |  |  |  |  |  |  |  |  |  |  |  |  |  |  |  |  |  |  |  |  |  |  |  |  |  |  |  |  |  |  |  |  |  |  |  |  |  |  |  |  |  |  |  |  |  |  |  |  |  |  |  |  |  |  |  |  |  |  |  |  |  |  |  |  |  |  |  |  |  |  |  |  |  |  |  |  |  |  |  |  |  |  |  |  |  |  |  |  |  |  |  |  |  |  |  |  |  |  |  |  |  |  |  |  |  |  |  |  |  |  |  |  |  |  |  |  |  |  |  |  |  |  |  |  |  |  |  |  |  |  |  |  |  |  |  |  |  |  |  |  |  |  |  |  |  |  |  |  |  |  |  |  |  |  |  |  |  |  |  |  |  |  |  |  |  |  |  |  |  |  |  |  |  |  |  |  |  |  |  |  |  |  |  |  |  |  |  |  |  |  |  |  |  |  |  |  |  |  |  |  |  |  |  |  |  |  |  |  |  |  |  |  |  |  |  |  |  |  |  |  |  |  |  |  |  |  |  |  |  |  |  |  |  |  |  |  |  |  |  |  |  |  |  |  |  |  |  |  |  |  |  |  |  |  |  |  |  |  |  |  |  |  |  |  |  |  |  |  |  |  |  |  |  |  |  |  |  |  |  |  |  |  |  |  |  |  |  |  |  |  |  |  |  |  |  |  |  |  |  |  |  |  |  |  |  |  |  |  |  |  |  |  |  |  |  |  |  |  |  |  |  |  |  |  |  |  |  |  |  |  |  |  |  |  |  |  |  |  |  |  |  |  |  |  |  |  |  |  |  |  |  |  |  |  |  |  |  |  |  |  |  |  |  |  |  |  |  |  |  |  |  |  |  |  |  |  |  |  |  |  |  |  |  |  |  |  |  |  |  |  |  |  |  |  |  |  |  |  |  |  |  |  |  |  |  |  |  |  |  |  |  |  |  |  |  |  |  |  |  |  |  |  |  |  |  |  |  |  |  |  |  |  |  |  |  |  |  |  |  |  |  |  |  |  |  |  |  |  |  |  |  |  |  |  |  |  |  |  |  |  |  |  |  |  |  |  |  |  |  |  |  |  |  |  |  |  |  |  |  |  |  |  |  |  |  |  |  |  |  |  |  |  |  |  |  |  |  |  |  |  |  |  |  |  |  |  |  |  |  |  |  |  |  |  |  |  |  |  |  |  |  |  |  |  |  |  |  |  |  |  |  |  |  |  |  |  |  |  |  |  |  |  |  |  |  |  |  |  |  |  |  |  |  |  |  |  |  |  |  |  |  |  |  |  |  |  |  |  |  |  |  |  |  |  |  |  |  |  |  |  |  |  |  |  |  |  |  |  |  |  |  |  |  |  |  |  |  |  |  |  |  |  |  |  |  |  |  |  |  |  |  |  |  |  |  |  |  |  |  |  |  |  |  |  |  |  |  |  |  |  |  |  |  |  |  |  |  |  |  |  |  |  |  |  |  |  |  |  |  |  |  |  |  |  |  |  |  |  |  |  |  |  |  |  |  |  |  |  |  |  |  |  |  |  |  |  |  |  |  |  |  |  |  |  |  |  |  |  |  |  |  |  |  |  |  |  |  |  |  |  |  |  |  |  |  |  |  |  |  |  |  |  |  |  |  |  |  |  |  |  |  |  |  |  |  |  |  |  |  |  |  |  |  |  |  |  |  |  |  |  |  |  |  |  |  |  |  |  |  |  |  |  |  |  |  |  |  |  |  |  |  |  |  |  |  |  |  |  |  |  |  |  |  |  |  |  |  |  |  |  |  |  |  |  |  |  |  |  |  |  |  |  |  |  |  |  |  |  |  |  |  |  |  |  |  |  |  |  |  |  |  |  |  |  |  |  |  |  |  |  |  |  |  |  |  |  |  |  |  |  |  |  |  |  |  |  |  |  |  |  |  |  |  |  |  |  |  |  |  |  |  |  |  |  |  |  |  |  |  |  |  |  |  |  |  |  |  |  |  |  |  |  |  |  |  |  |  |  |  |  |  |  |  |  |  |  |  |  |  |  |  |  |  |  |  |  |  |  |  |  |  |  |  |  |  |  |  |  |  |  |  |  |  |  |  |  |  |  |  |  |  |  |  |  |  |  |  |  |  |  |  |  |  |  |  |  |  |  |  |  |  |  |  |  |  |  |  |  |  |  |  |  |  |  |  |  |  |  |  |  |  |  |  |  |  |  |  |  |  |  |  |  |  |  |  |  |  |  |  |  |  |  |  |  |  |  |  |  |  |  |  |  |  |  |  |  |  |  |  |  |  |  |  |  |  |  |  |  |  |  |  |  |  |  |  |  |  |  |  |  |  |  |  |  |  |  |  |  |  |  |  |  |  |  |  |  |  |  |  |  |  |  |  |  |  |  |  |  |  |  |  |  |  |  |  |  |  |  |  |  |  |  |  |  |  |  |  |  |  |  |  |  |  |  |  |  |  |  |  |  |  |  |  |  |  |  |  |  |  |  |  |  |  |  |  |  |  |  |  |  |  |  |  |  |  |  |  |  |  |  |  |  |  |  |  |  |  |  |  |  |  |  |  |  |  |  |  |  |  |  |  |  |  |  |  |  |  |  |  |  |  |  |  |  |  |  |  |  |  |  |  |  |  |  |  |  |  |  |  |  |  |  |  |  |  |  |  |  |  |  |  |  |  |  |  |  |  |  |  |  |  |  |  |  |  |  |  |  |  |  |  |  |  |  |  |  |  |  |  |  |  |  |  |  |  |  |  |  |  |  |  |  |  |  |  |  |  |  |  |  |  |  |  |  |  |  |  |  |  |  |  |  |  |  |  |  |  |  |  |  |  |  |  |  |  |  |  |  |  |  |  |  |  |  |  |  |  |  |  |  |  |  |  |  |  |  |  |  |  |  |  |  |  |  |  |  |  |  |  |  |  |  |  |  |  |  |  |  |  |  |  |  |  |  |  |  |  |  |  |  |  |  |  |  |  |  |  |  |  |  |  |  |  |  |  |  |  |  |  |  |  |  |  |  |  |  |  |  |  |  |  |  |  |  |  |  |  |  |  |  |  |  |  |  |  |  |  |  |  |  |  |  |  |  |  |  |  |  |  |  |  |  |  |  |  |  |  |  |  |  |  |  |  |  |  |  |  |  |  |  |  |  |  |  |  |  |  |  |  |  |  |  |  |  |  |  |  |  |  |  |  |  |  |  |  |  |  |  |  |  |  |  |  |  |  |  |  |  |  |  |  |  |  |  |  |  |  |  |  |  |  |  |  |  |  |  |  |  |  |  |  |  |  |  |  |  |  |  |  |  |  |  |  |  |  |  |  |  |  |  |  |  |  |  |  |  |  |  |  |  |  |  |  |  |  |  |  |  |  |  |  |  |  |  |  |  |  |  |  |  |  |  |  |  |  |  |  |  |  |  |  |  |  |  |  |  |  |  |  |  |  |  |  |  |  |  |  |  |  |  |  |  |  |  |  |  |  |  |  |  |  |  |  |  |  |  |  |  |  |  |  |  |  |  |  |  |  |  |  |  |  |  |  |  |  |  |  |  |  |  |  |  |  |  |  |  |  |  |  |  |  |  |  |  |  |  |  |  |  |  |  |  |  |  |  |  |  |  |  |  |  |  |  |  |  |  |  |  |  |  |  |  |  |  |  |  |  |  |  |  |  |  |  |  |  |  |  |  |  |  |  |  |  |  |  |  |  |  |  |  |  |  |  |  |  |  |  |  |  |  |  |  |  |  |  |  |  |  |  |  |  |  |  |  |  |  |  |  |  |  |  |  |  |  |  |  |  |  |  |  |  |  |  |  |  |  |  |  |  |  |  |  |  |  |  |  |  |  |  |  |  |  |  |  |  |  |  |  |  |  |  |  |  |  |  |  |  |  |  |  |  |  |  |  |  |  |  |  |  |  |  |  |  |  |  |  |  |  |  |  |  |  |  |  |  |  |  |  |  |  |  |  |  |  |  |  |  |  |  |  |  |  |  |  |  |  |  |  |  |  |  |  |  |  |  |  |  |  |  |  |  |  |  |  |  |  |  |  |  |  |  |  |  |  |  |  |  |  |  |  |  |  |  |  |  |  |  |  |  |  |  |  |  |  |  |  |  |  |  |  |  |  |  |  |  |  |  |  |  |  |  |  |  |  |  |  |  |  |  |  |  |  |  |  |  |  |  |  |  |  |  |  |  |  |  |  |  |  |  |  |  |  |  |  |  |  |  |  |  |  |  |  |  |  |  |  |  |  |  |  |  |  |  |  |  |  |  |  |  |  |  |  |  |  |  |  |  |  |  |  |  |  |  |  |  |  |  |  |  |  |  |  |  |  |  |  |  |  |  |  |  |  |  |  |  |  |  |  |  |  |  |  |  |  |  |  |  |  |  |  |  |  |  |  |  |  |  |  |  |  |  |  |  |  |  |  |  |  |  |  |  |  |  |  |  |  |  |  |  |  |  |  |  |  |  |  |  |  |  |  |  |  |  |  |  |  |  |  |  |  |  |  |  |  |  |  |  |  |  |  |  |  |  |  |  |  |  |  |  |  |  |  |  |  |  |  |  |  |  |  |  |  |  |  |  |  |  |  |  |  |  |  |  |  |  |  |  |  |  |  |  |  |  |  |  |  |  |  |  |  |  |  |  |  |  |  |  |  |  |  |  |  |  |  |  |  |  |  |  |  |  |  |  |  |  |  |  |  |  |  |  |  |  |  |  |  |  |  |  |  |  |  |  |  |  |  |  |  |  |  |  |  |  |  |  |  |  |  |  |  |  |  |  |  |  |  |  |  |  |  |  |  |  |  |  |  |  |  |  |  |  |  |  |  |  |  |  |  |  |  |  |  |  |  |  |  |  |  |  |  |  |  |  |  |  |  |  |  |  |  |  |  |  |  |  |  |  |  |  |  |  |  |  |  |  |  |  |  |  |  |  |  |  |  |  |  |  |  |  |  |  |  |  |  |  |  |  |  |  |  |  |  |  |  |  |  |  |  |  |  |  |  |  |  |  |  |  |  |  |  |  |  |  |  |  |  |  |  |  |  |  |  |  |  |  |  |  |  |  |  |  |  |  |  |  |  |  |  |  |  |  |  |  |  |  |  |  |  |  |  |  |  |  |  |  |  |  |  |  |  |  |  |  |  |  |  |  |  |  |  |  |  |  |  |  |  |  |  |  |  |  |  |  |  |  |  |  |  |  |  |  |  |  |  |  |  |  |  |  |  |  |  |  |  |  |  |  |  |  |  |  |  |  |  |  |  |  |  |  |  |  |  |  |  |  |  |  |  |  |  |  |  |  |  |  |  |  |  |  |  |  |  |  |  |  |  |  |  |  |  |  |  |  |  |  |  |  |  |  |  |  |  |  |  |  |  |  |  |  |  |  |  |  |  |  |  |  |  |  |  |  |  |  |  |  |  |  |  |  |  |  |  |  |  |  |  |  |  |  |  |  |  |  |  |  |  |  |  |  |  |  |  |  |  |  |  |  |  |  |  |  |  |  |  |  |  |  |  |  |  |  |  |  |  |  |  |  |  |  |  |  |  |  |  |  |  |  |  |  |  |  |  |  |  |  |  |  |  |  |  |  |  |  |  |  |  |  |  |  |  |  |  |  |  |  |  |  |  |  |  |  |  |  |  |  |  |  |  |  |  |  |  |  |  |  |  |  |  |  |  |  |  |  |  |  |  |  |  |  |  |  |  |  |  |  |  |  |  |  |  |  |  |  |  |  |  |  |  |  |  |  |  |  |  |  |  |  |  |  |  |  |  |  |  |  |  |  |  |  |  |  |  |  |  |  |  |  |  |  |  |  |  |  |  |  |  |  |  |  |  |  |  |  |  |  |  |  |  |  |  |  |  |  |  |  |  |  |  |  |  |  |  |  |  |  |  |  |  |  |  |  |  |  |  |  |  |  |  |  |  |  |  |  |  |  |  |  |  |  |  |  |  |  |  |  |  |  |  |  |  |  |  |  |  |  |  |  |  |  |  |  |  |  |  |  |  |  |  |  |  |  |  |  |  |  |  |  |  |  |  |  |  |  |  |  |  |  |  |  |  |  |  |  |  |  |  |  |  |  |  |  |  |  |  |  |  |  |  |  |  |  |  |  |  |  |  |  |  |  |  |  |  |  |  |  |  |  |  |  |  |  |  |  |  |  |  |  |  |  |  |  |  |  |  |  |  |  |  |  |  |  |  |  |  |  |  |  |  |  |  |  |  |  |  |  |  |  |  |  |  |  |  |  |  |  |  |  |  |  |  |  |  |  |  |  |  |  |  |  |  |  |  |  |  |  |  |  |  |  |  |  |  |  |  |  |  |  |  |  |  |  |  |  |  |  |  |  |  |  |  |  |  |  |  |  |  |  |  |  |  |  |  |  |  |  |  |  |  |  |  |  |  |  |  |  |  |  |  |  |  |  |  |  |  |  |  |  |  |  |  |  |  |  |  |  |  |  |  |  |  |  |  |  |  |  |  |  |  |  |  |  |  |  |  |  |  |  |  |  |  |  |  |  |  |  |  |  |  |  |  |  |  |  |  |  |  |  |  |  |  |  |  |  |  |  |  |  |  |  |  |  |  |  |  |  |  |  |  |  |  |  |  |  |  |  |  |  |  |  |  |  |  |  |  |  |  |  |  |  |  |  |  |  |  |  |  |  |  |  |  |  |  |  |  |  |  |  |  |  |  |  |  |  |  |  |  |  |  |  |  |  |  |  |  |  |  |  |  |  |  |  |  |  |  |  |  |  |  |  |  |  |  |  |  |  |  |  |  |  |  |  |  |  |  |  |  |  |  |  |  |  |  |  |  |  |  |  |  |  |  |  |  |  |  |  |  |  |  |  |  |  |  |  |  |  |  |  |  |  |  |  |  |  |  |  |  |  |  |  |  |  |  |  |  |  |  |  |  |  |  |  |  |  |  |  |  |  |  |  |  |  |  |  |  |  |  |  |  |  |  |  |  |  |  |  |  |  |  |  |  |  |  |  |  |  |  |  |  |  |  |  |  |  |  |  |  |  |  |  |  |  |  |  |  |  |  |  |  |  |  |  |  |  |  |  |  |  |  |  |  |  |  |  |  |  |  |  |  |  |  |  |  |  |  |  |  |  |  |  |  |  |  |  |  |  |  |  |  |  |  |  |  |  |  |  |  |  |  |  |  |  |  |  |  |  |  |  |  |  |  |  |  |  |  |  |  |  |  |  |  |  |  |  |  |  |  |  |  |  |  |  |  |  |  |  |  |  |  |  |  |  |  |  |  |  |  |  |  |  |  |  |  |  |  |  |  |  |  |  |  |  |  |  |  |  |  |  |  |  |  |  |  |  |  |  |  |  |  |  |  |  |  |  |  |  |  |  |  |  |  |  |  |  |  |  |  |  |  |  |  |  |  |  |  |  |  |  |  |  |  |  |  |  |  |  |  |  |  |  |  |  |  |  |  |  |  |  |  |  |  |  |  |  |  |  |  |  |  |  |  |  |  |  |  |  |  |  |  |  |  |  |  |  |  |  |  |  |  |  |  |  |  |  |  |  |  |  |  |  |  |  |  |  |  |  |  |  |  |  |  |  |  |  |  |  |  |  |  |  |  |  |  |  |  |  |  |  |  |  |  |  |  |  |  |  |  |  |  |  |  |  |  |  |  |  |  |  |  |  |  |  |  |  |  |  |  |  |  |  |  |  |  |  |  |  |  |  |  |  |  |  |  |  |  |  |  |  |  |  |  |  |  |  |  |  |  |  |  |  |  |  |  |  |  |  |  |  |  |  |  |  |  |  |  |  |  |  |  |  |  |  |  |  |  |  |  |  |  |  |  |  |  |  |  |  |  |  |  |  |  |  |  |  |  |  |  |  |  |  |  |  |  |  |  |  |  |  |  |  |  |  |  |  |  |  |  |  |  |  |  |  |  |  |  |  |  |  |  |  |  |  |  |  |  |  |  |  |  |  |  |  |  |  |  |  |  |  |  |  |  |  |  |  |  |  |  |  |  |  |  |  |  |  |  |  |  |  |  |  |  |  |  |  |  |  |  |  |  |  |  |  |  |  |  |  |  |  |  |  |  |  |  |  |  |  |  |  |  |  |  |  |  |  |  |  |  |  |  |  |  |  |  |  |  |  |  |  |  |  |  |  |  |  |  |  |  |  |  |  |  |  |  |  |  |  |  |  |  |  |  |  |  |  |  |  |  |  |  |  |  |  |  |  |  |  |  |  |  |  |  |  |  |  |  |  |  |  |  |  |  |  |  |  |  |  |  |  |  |  |  |  |  |  |  |  |  |  |  |  |  |  |  |  |  |  |  |  |  |  |  |  |  |  |  |  |  |  |  |  |  |  |  |  |  |  |  |  |  |  |  |  |  |  |  |  |  |  |  |  |  |  |  |  |  |  |  |  |  |  |  |  |  |  |  |  |  |  |  |  |  |  |  |  |  |  |  |  |  |  |  |  |  |  |  |  |  |  |  |  |  |  |  |  |  |  |  |  |  |  |  |  |  |  |  |  |  |  |  |  |  |  |  |  |  |  |  |  |  |  |  |  |  |  |  |  |  |  |  |  |  |  |  |  |  |  |  |  |  |  |  |  |  |  |  |  |  |  |  |  |  |  |  |  |  |  |  |  |  |  |  |  |  |  |  |  |  |  |  |  |  |  |  |  |  |  |  |  |  |  |  |  |  |  |  |  |  |  |  |  |  |  |  |  |  |  |  |  |  |  |  |  |  |  |  |  |  |  |  |  |  |  |  |  |  |  |  |  |  |  |  |  |  |  |  |  |  |  |  |  |  |  |  |  |  |  |  |  |  |  |  |  |  |  |  |  |  |  |  |  |  |  |  |  |  |  |  |  |  |  |  |  |  |  |  |  |  |  |  |  |  |  |  |  |  |  |  |  |  |  |  |  |  |  |  |  |  |  |  |  |  |  |  |  |  |  |  |  |  |  |  |  |  |  |  |  |  |  |  |  |  |  |  |  |  |  |  |  |  |  |  |  |  |  |  |  |  |  |  |  |  |  |  |  |  |  |  |  |  |  |  |  |  |  |  |  |  |  |  |  |  |  |  |  |  |  |  |  |  |  |  |  |  |  |  |  |  |  |  |  |  |  |  |  |  |  |  |  |  |  |  |  |  |  |  |  |  |  |  |  |  |  |  |  |  |  |  |  |  |  |  |  |  |  |  |  |  |  |  |  |  |  |  |  |  |  |  |  |  |  |  |  |  |  |  |  |  |  |  |  |  |  |  |  |  |  |  |  |  |  |  |  |  |  |  |  |  |  |  |  |  |  |  |  |  |  |  |  |  |  |  |  |  |  |  |  |  |  |  |  |  |  |  |  |  |  |  |  |  |  |  |  |  |  |  |  |  |  |  |  |  |  |  |  |  |  |  |  |  |  |  |  |  |  |  |  |  |  |  |  |  |  |  |  |  |  |  |  |  |  |  |  |  |  |  |  |  |  |  |  |  |  |  |  |  |  |  |  |  |  |  |  |  |  |  |  |  |  |  |  |  |  |  |  |  |  |  |  |  |  |  |  |  |  |  |  |  |  |  |  |  |  |  |  |  |  |  |  |  |  |  |  |  |  |  |  |  |  |  |  |  |  |  |  |  |  |  |  |  |  |  |  |  |  |  |  |  |  |  |  |  |  |  |  |  |  |  |  |  |  |  |  |  |  |  |  |  |  |  |  |  |  |  |  |  |  |  |  |  |  |  |  |  |  |  |  |  |  |  |  |  |  |  |  |  |  |  |  |  |  |  |  |  |  |  |  |  |  |  |  |  |  |  |  |  |  |  |  |  |  |  |  |  |  |  |  |  |  |  |  |  |  |  |  |  |  |  |  |  |  |  |  |  |  |  |  |  |  |  |  |  |  |  |  |  |  |  |  |  |  |  |  |  |  |  |  |  |  |  |  |  |  |  |  |  |  |  |  |  |  |  |  |  |  |  |  |  |  |  |  |  |  |  |  |  |  |  |  |  |  |  |  |  |  |  |  |  |  |  |  |  |  |  |  |  |  |  |  |  |  |  |  |  |  |  |  |  |  |  |  |  |  |  |  |  |  |  |  |  |  |  |  |  |  |  |  |  |  |  |  |  |  |  |  |  |  |  |  |  |  |  |  |  |  |  |  |  |  |  |  |  |  |  |  |  |  |  |  |  |  |  |  |  |  |  |  |  |  |  |  |  |  |  |  |  |  |  |  |  |  |  |  |  |  |  |  |  |  |  |  |  |  |  |  |  |  |  |  |  |  |  |  |  |  |  |  |  |  |  |  |  |  |  |  |  |  |  |  |  |  |  |  |  |  |  |  |  |  |  |  |  |  |  |  |  |  |  |  |  |  |  |  |  |  |  |  |  |  |  |  |  |  |  |  |  |  |  |  |  |  |  |  |  |  |  |  |  |  |  |  |  |  |  |  |  |  |  |  |  |  |  |  |  |  |  |  |  |  |  |  |  |  |  |  |  |  |  |  |  |  |  |  |  |  |  |  |  |  |  |  |  |  |  |  |  |  |  |  |  |  |  |  |  |  |  |  |  |  |  |  |  |  |  |  |  |  |  |  |  |  |  |  |  |  |  |  |  |  |  |  |  |  |  |  |  |  |  |  |  |  |  |  |  |  |  |  |  |  |  |  |  |  |  |  |  |  |  |  |  |  |  |  |  |  |  |  |  |  |  |  |  |  |  |  |  |  |  |  |  |  |  |  |  |  |  |  |  |  |  |  |  |  |  |  |  |  |  |  |  |  |  |  |  |  |  |  |  |  |  |  |  |  |  |  |  |  |  |  |  |  |  |  |  |  |  |  |  |  |  |  |  |  |  |  |  |  |  |  |  |  |  |  |  |  |  |  |  |  |  |  |  |  |  |  |  |  |  |  |  |  |  |  |  |  |  |  |  |  |  |  |  |  |  |  |  |  |  |  |  |  |  |  |  |  |  |  |  |  |  |  |  |  |  |  |  |  |  |  |  |  |  |  |  |  |  |  |  |  |  |  |  |  |  |  |  |  |  |  |  |  |  |  |  |  |  |  |  |  |  |  |  |  |  |  |  |  |  |  |  |  |  |  |  |  |  |  |  |  |  |  |  |  |  |  |  |  |  |  |  |  |  |  |  |  |  |  |  |  |  |  |  |  |  |  |  |  |  |  |  |  |  |  |  |  |  |  |  |  |  |  |  |  |  |  |  |  |  |  |  |  |  |  |  |  |  |  |  |  |  |  |  |  |  |  |  |  |  |  |  |  |  |  |  |  |  |  |  |  |  |  |  |  |  |  |  |  |  |  |  |  |  |  |  |  |  |  |  |  |  |  |  |  |  |  |  |  |  |  |  |  |  |  |  |  |  |  |  |  |  |  |  |  |  |  |  |  |  |  |  |  |  |  |  |  |  |  |  |  |  |  |  |  |  |  |  |  |  |  |  |  |  |  |  |  |  |  |  |  |  |  |  |  |  |  |  |  |  |  |  |  |  |  |  |  |  |  |  |  |  |  |  |  |  |  |  |  |  |  |  |  |  |  |  |  |  |  |  |  |  |  |  |  |  |  |  |  |  |  |  |  |  |  |  |  |  |  |  |  |  |  |  |  |  |  |  |  |  |  |  |  |  |  |  |  |  |  |  |  |  |  |  |  |  |  |  |  |  |  |  |  |  |  |  |  |  |  |  |  |  |  |  |  |  |  |  |  |  |  |  |  |  |  |  |  |  |  |  |  |  |  |  |  |  |  |  |  |  |  |  |  |  |  |  |  |  |  |  |  |  |  |  |  |  |  |  |  |  |  |  |  |  |  |  |  |  |  |  |  |  |  |  |  |  |  |  |  |  |  |  |  |  |  |  |  |  |  |  |  |  |  |  |  |  |  |  |  |  |  |  |  |  |  |  |  |  |  |  |  |  |  |  |  |  |  |  |  |  |  |  |  |  |  |  |  |  |  |  |  |  |  |  |  |  |  |  |  |  |  |  |  |  |  |  |  |  |  |  |  |  |  |  |  |  |  |  |  |  |  |  |  |  |  |  |  |  |  |  |  |  |  |  |  |  |  |  |  |  |  |  |  |  |  |  |  |  |  |  |  |  |  |  |  |  |  |  |  |  |  |  |  |  |  |  |  |  |  |  |  |  |  |  |  |  |  |  |  |  |  |  |  |  |  |  |  |  |  |  |  |  |  |  |  |  |  |  |  |  |  |  |  |  |  |  |  |  |  |  |  |  |  |  |  |  |  |  |  |  |  |  |  |  |  |  |  |  |  |  |  |  |  |  |  |  |  |  |  |  |  |  |  |  |  |  |  |  |  |  |  |  |  |  |  |  |  |  |  |  |  |  |  |  |  |  |  |  |  |  |  |  |  |  |  |  |  |  |  |  |  |  |  |  |  |  |  |  |  |  |  |  |  |  |  |  |  |  |  |  |  |  |  |  |  |  |  |  |  |  |  |  |  |  |  |  |  |  |  |  |  |  |  |  |  |  |  |  |  |  |  |  |  |  |  |  |  |  |  |  |  |  |  |  |  |  |  |  |  |  |  |  |  |  |  |  |  |  |  |  |  |  |  |  |  |  |  |  |  |  |  |  |  |  |  |  |  |  |  |  |  |  |  |  |  |  |  |  |  |  |  |  |  |  |  |  |  |  |  |  |  |  |  |  |  |  |  |  |  |  |  |  |  |  |  |  |  |  |  |  |  |  |  |  |  |  |  |  |  |  |  |  |  |  |  |  |  |  |  |  |  |  |  |  |  |  |  |  |  |  |  |  |  |  |  |  |  |  |  |  |  |  |  |  |  |  |  |  |  |  |  |  |  |  |  |  |  |  |  |  |  |  |  |  |  |  |  |  |  |  |  |  |  |  |  |  |  |  |  |  |  |  |  |  |  |  |  |  |  |  |  |  |  |  |  |  |  |  |  |  |  |  |  |  |  |  |  |  |  |  |  |  |  |  |  |  |  |  |  |  |  |  |  |  |  |  |  |  |  |  |  |  |  |  |  |  |  |  |  |  |  |  |  |  |  |  |  |  |  |  |  |  |  |  |  |  |  |  |  |  |  |  |  |  |  |  |  |  |  |  |  |  |  |  |  |  |  |  |  |  |  |  |  |  |  |  |  |  |  |  |  |  |  |  |  |  |  |  |  |  |  |  |  |  |  |  |  |  |  |  |  |  |  |  |  |  |  |  |  |  |  |  |  |  |  |  |  |  |  |  |  |  |  |  |  |  |  |  |  |  |  |  |  |  |  |  |  |  |  |  |  |  |  |  |  |  |  |  |  |  |  |  |  |  |  |  |  |  |  |  |  |  |  |  |  |  |  |  |  |  |  |  |  |  |  |  |  |  |  |  |  |  |  |  |  |  |  |  |  |  |  |  |  |  |  |  |  |  |  |  |  |  |  |  |  |  |  |  |  |  |  |  |  |  |  |  |  |  |  |  |  |  |  |  |  |  |  |  |  |  |  |  |  |  |  |  |  |  |  |  |  |  |  |  |  |  |  |  |  |  |  |  |  |  |  |  |  |  |  |  |  |  |  |  |  |  |  |  |  |  |  |  |  |  |  |  |  |  |  |  |  |  |  |  |  |  |  |  |  |  |  |  |  |  |  |  |  |  |  |  |  |  |  |  |  |  |  |  |  |  |  |  |  |  |  |  |  |  |  |  |  |  |  |  |  |  |  |  |  |  |  |  |  |  |  |  |  |  |  |  |  |  |  |  |  |  |  |  |  |  |  |  |  |  |  |  |  |  |  |  |  |  |  |  |  |  |  |  |  |  |  |  |  |  |  |  |  |  |  |  |  |  |  |  |  |  |  |  |  |  |  |  |  |  |  |  |  |  |  |  |  |  |  |  |  |  |  |  |  |  |  |  |  |  |  |  |  |  |  |  |  |  |  |  |  |  |  |  |  |  |  |  |  |  |  |  |  |  |  |  |  |  |  |  |  |  |  |  |  |  |  |  |  |  |  |  |  |  |  |  |  |  |  |  |  |  |  |  |  |  |  |  |  |  |  |  |  |  |  |  |  |  |  |  |  |  |  |  |  |  |  |  |  |  |  |  |  |  |  |  |  |  |  |  |  |  |  |  |  |  |  |  |  |  |  |  |  |  |  |  |  |  |  |  |  |  |  |  |  |  |  |  |  |  |  |  |  |  |  |  |  |  |  |  |  |  |  |  |  |  |  |  |  |  |  |  |  |  |  |  |  |  |  |  |  |  |  |  |  |  |  |  |  |  |  |  |  |  |  |  |  |  |  |  |  |  |  |  |  |  |  |  |  |  |  |  |  |  |  |  |  |  |  |  |  |  |  |  |  |  |  |  |  |  |  |  |  |  |  |  |  |  |  |  |  |  |  |  |  |  |  |  |  |  |  |  |  |  |  |  |  |  |  |  |  |  |  |  |  |  |  |  |  |  |  |  |  |  |  |  |  |  |  |  |  |  |  |  |  |  |  |  |  |  |  |  |  |  |  |  |  |  |  |  |  |  |  |  |  |  |  |  |  |  |  |  |  |  |  |  |  |  |  |  |  |  |  |  |  |  |  |  |  |  |  |  |  |  |  |  |  |  |  |  |  |  |  |  |  |  |  |  |  |  |  |  |  |  |  |  |  |  |  |  |  |  |  |  |  |  |  |  |  |  |  |  |  |  |  |  |  |  |  |  |  |  |  |  |  |  |  |  |  |  |  |  |  |  |  |  |  |  |  |  |  |  |  |  |  |  |  |  |  |  |  |  |  |  |  |  |  |  |  |  |  |  |  |  |  |  |  |  |  |  |  |  |  |  |  |  |  |  |  |  |  |  |  |  |  |  |  |  |  |  |  |  |  |  |  |  |  |  |  |  |  |  |  |  |  |  |  |  |  |  |  |  |  |  |  |  |  |  |  |  |  |  |  |  |  |  |  |  |  |  |  |  |  |  |  |  |  |  |  |  |  |  |  |  |  |  |  |  |  |  |  |  |  |  |  |  |  |  |  |  |  |  |  |  |  |  |  |  |  |  |  |  |  |  |  |  |  |  |  |  |  |  |  |  |  |  |  |  |  |  |  |  |  |  |  |  |  |  |  |  |  |  |  |  |  |  |  |  |  |  |  |  |  |  |  |  |  |  |  |  |  |  |  |  |  |  |  |  |  |  |  |  |  |  |  |  |  |  |  |  |  |  |  |  |  |  |  |  |  |  |  |  |  |  |  |  |  |  |  |  |  |  |  |  |  |  |  |  |  |  |  |  |  |  |  |  |  |  |  |  |  |  |  |  |  |  |  |  |  |  |  |  |  |  |  |  |  |  |  |  |  |  |  |  |  |  |  |  |  |  |  |  |  |  |  |  |  |  |  |  |  |  |  |  |  |  |  |  |  |  |  |  |  |  |  |  |  |  |  |  |  |  |  |  |  |  |  |  |  |  |  |  |  |  |  |  |  |  |  |  |  |  |  |  |  |  |  |  |  |  |  |  |  |  |  |  |  |  |  |  |  |  |  |  |  |  |  |  |  |  |  |  |  |  |  |  |  |  |  |  |  |  |  |  |  |  |  |  |  |  |  |  |  |  |  |  |  |  |  |  |  |  |  |  |  |  |  |  |  |  |  |  |  |  |  |  |  |  |  |  |  |  |  |  |  |  |  |  |  |  |  |  |  |  |  |  |  |  |  |  |  |  |  |  |  |  |  |  |  |  |  |  |  |  |  |  |  |  |  |  |  |  |  |  |  |  |  |  |  |  |  |  |  |  |  |  |  |  |  |  |  |  |  |  |  |  |  |  |  |  |  |  |  |  |  |  |  |  |  |  |  |  |  |  |  |  |  |  |  |  |  |  |  |  |  |  |  |  |  |  |  |  |  |  |  |  |  |  |  |  |  |  |  |  |  |  |  |  |  |  |  |  |  |  |  |  |  |  |  |  |  |  |  |  |  |  |  |  |  |  |  |  |  |  |  |  |  |  |  |  |  |  |  |  |  |  |  |  |  |  |  |  |  |  |  |  |  |  |  |  |  |  |  |  |  |  |  |  |  |  |  |  |  |  |  |  |  |  |  |  |  |  |  |  |  |  |  |  |  |  |  |  |  |  |  |  |  |  |  |  |  |  |  |  |  |  |  |  |  |  |  |  |  |  |  |  |  |  |  |  |  |  |  |  |  |  |  |  |  |  |  |  |  |  |  |  |  |  |  |  |  |  |  |  |  |  |  |  |  |  |  |  |  |  |  |  |  |  |  |  |  |  |  |  |  |  |  |  |  |  |  |  |  |  |  |  |  |  |  |  |  |  |  |  |  |  |  |  |  |  |  |  |  |  |  |  |  |  |  |  |  |  |  |  |  |  |  |  |  |  |  |  |  |  |  |  |  |  |  |  |  |  |  |  |  |  |  |  |  |  |  |  |  |  |  |  |  |  |  |  |  |  |  |  |  |  |  |  |  |  |  |  |  |  |  |  |  |  |  |  |  |  |  |  |  |  |  |  |  |  |  |  |  |  |  |  |  |  |  |  |  |  |  |  |  |  |  |  |  |  |  |  |  |  |  |  |  |  |  |  |  |  |  |  |  |  |  |  |  |  |  |  |  |  |  |  |  |  |  |  |  |  |  |  |  |  |  |  |  |  |  |  |  |  |  |  |  |  |  |  |  |  |  |  |  |  |  |  |  |  |  |  |  |  |  |  |  |  |  |  |  |  |  |  |  |  |  |  |  |  |  |  |  |  |  |  |  |  |  |  |  |  |  |  |  |  |  |  |  |  |  |  |  |  |  |  |  |  |  |  |  |  |  |  |  |  |  |  |  |  |  |  |  |  |  |  |  |  |  |  |  |  |  |  |  |  |  |  |  |  |  |  |  |  |  |  |  |  |  |  |  |  |  |  |  |  |  |  |  |  |  |  |  |  |  |  |  |  |  |  |  |  |  |  |  |  |  |  |  |  |  |  |  |  |  |  |  |  |  |  |  |  |  |  |  |  |  |  |  |  |  |  |  |  |  |  |  |  |  |  |  |  |  |  |  |  |  |  |  |  |  |  |  |  |  |  |  |  |  |  |  |  |  |  |  |  |  |  |  |  |  |  |  |  |  |  |  |  |  |  |  |  |  |  |  |  |  |  |  |  |  |  |  |  |  |  |  |  |  |  |  |  |  |  |  |  |  |  |  |  |  |  |  |  |  |  |  |  |  |  |  |  |  |  |  |  |  |  |  |  |  |  |  |  |  |  |  |  |  |  |  |  |  |  |  |  |  |  |  |  |  |  |  |  |  |  |  |  |  |  |  |  |  |  |  |  |  |  |  |  |  |  |  |  |  |  |  |  |  |  |  |  |  |  |  |  |  |  |  |  |  |  |  |  |  |  |  |  |  |  |  |  |  |  |  |  |  |  |  |  |  |  |  |  |  |  |  |  |  |  |  |  |  |  |  |  |  |  |  |  |  |  |  |  |  |  |  |  |  |  |  |  |  |  |  |  |  |  |  |  |  |  |  |  |  |  |  |  |  |  |  |  |  |  |  |  |  |  |  |  |  |  |  |  |  |  |  |  |  |  |  |  |  |  |  |  |  |  |  |  |  |  |  |  |  |  |  |  |  |  |  |  |  |  |  |  |  |  |  |  |  |  |  |  |  |  |  |  |  |  |  |  |  |  |  |  |  |  |  |  |  |  |  |  |  |  |  |  |  |  |  |  |  |  |  |  |  |  |  |  |  |  |  |  |  |  |  |  |  |  |  |  |  |  |  |  |  |  |  |  |  |  |  |  |  |  |  |  |  |  |  |  |  |  |  |  |  |  |  |  |  |  |  |  |  |  |  |  |  |  |  |  |  |  |  |  |  |  |  |  |  |  |  |  |  |  |  |  |  |  |  |  |  |  |  |  |  |  |  |  |  |  |  |  |  |  |  |  |  |  |  |  |  |  |  |  |  |  |  |  |  |  |  |  |  |  |  |  |  |  |  |  |  |  |  |  |  |  |  |  |  |  |  |  |  |  |  |  |  |  |  |  |  |  |  |  |  |  |  |  |  |  |  |  |  |  |  |  |  |  |  |  |  |  |  |  |  |  |  |  |  |  |  |  |  |  |  |  |  |  |  |  |  |  |  |  |  |  |  |  |  |  |  |  |  |  |  |  |  |  |  |  |  |  |  |  |  |  |  |  |  |  |  |  |  |  |  |  |  |  |  |  |  |  |  |  |  |  |  |  |  |  |  |  |  |  |  |  |  |  |  |  |  |  |  |  |  |  |  |  |  |  |  |  |  |  |  |  |  |  |  |  |  |  |  |  |  |  |  |  |  |  |  |  |  |  |  |  |  |  |  |  |  |  |  |  |  |  |  |  |  |  |  |  |  |  |  |  |  |  |  |  |  |  |  |  |  |  |  |  |  |  |  |  |  |  |  |  |  |  |  |  |  |  |  |  |  |  |  |  |  |  |  |  |  |  |  |  |  |  |  |  |  |  |  |  |  |  |  |  |  |  |  |  |  |  |  |  |  |  |  |  |  |  |  |  |  |  |  |  |  |  |  |  |  |  |  |  |  |  |  |  |  |  |  |  |  |  |  |  |  |  |  |  |  |  |  |  |  |  |  |  |  |  |  |  |  |  |  |  |  |  |  |  |  |  |  |  |  |  |  |  |  |  |  |  |  |  |  |  |  |  |  |  |  |  |  |  |  |  |  |  |  |  |  |  |  |  |  |  |  |  |  |  |  |  |  |  |  |  |  |  |  |  |  |  |  |  |  |  |  |  |  |  |  |  |  |  |  |  |  |  |  |  |  |  |  |  |  |  |  |  |  |  |  |  |  |  |  |  |  |  |  |  |  |  |  |  |  |  |  |  |  |  |  |  |  |  |  |  |  |  |  |  |  |  |  |  |  |  |  |  |  |  |  |  |  |  |  |  |  |  |  |  |  |  |  |  |  |  |  |  |  |  |  |  |  |  |  |  |  |  |  |  |  |  |  |  |  |  |  |  |  |  |  |  |  |  |  |  |  |  |  |  |  |  |  |  |  |  |  |  |  |  |  |  |  |  |  |  |  |  |  |  |  |  |  |  |  |  |  |  |  |  |  |  |  |  |  |  |  |  |  |  |  |  |  |  |  |  |  |  |  |  |  |  |  |  |  |  |  |  |  |  |  |  |  |  |  |  |  |  |  |  |  |  |  |  |  |  |  |  |  |  |  |  |  |  |  |  |  |  |  |  |  |  |  |  |  |  |  |  |  |  |  |  |  |  |  |  |  |  |  |  |  |  |  |  |  |  |  |  |  |  |  |  |  |  |  |
|        | gagccucucuaaaaggggagauuguguaaaagggaaa                                                        |  |  |  |  |  |  |  |  |      |  |  |  |  |  |  |  |  |  |  | ggugugucucugcucucuggc |  |  |  |  |  |  |  |  |  |  |  |  |  |  |  |  |  |  |  | caggggaaccgau |  |  |  |  |  |  |  |  |  |  |  |  |  |  |  |  |  |  |  | gagcagca |  |  |  |  |  |  |  |  |  |  |  |  |  |  |  |  |  |  |  | aagugagcaagggcca  |  |  |  |  |  |  |  |  |  |  |  |  |  |  |  |  |  |  |  | augga |  |  |  |  |  |  |  |  |  |  |  |  |  |  |  |  |  |  |  | cuuggcgacagcauuu |  |  |  |  |  |  |  |  |  |  |  |  |  |  |  |  |  |  |  | gcguc |  |  |  |  |  |  |  |  |  |  |  |  |  |  |  |  |  |  |  |     | exp |  |  |  |  |  |  |  |  |  |  |  |  |  |  |  |  |  |  |  |  |  |  |  |  |  |  |  |  |  |  |  |  |  |  |  |  |  |  |  |  |  |  |  |  |  |  |  |  |  |  |  |  |  |  |  |  |  |  |  |  |  |  |  |  |  |  |  |  |  |  |  |  |  |  |  |  |  |  |  |  |  |  |  |  |  |  |  |  |  |  |  |  |  |  |  |  |  |  |  |  |  |  |  |  |  |  |  |  |  |  |  |  |  |  |  |  |  |  |  |  |  |  |  |  |  |  |  |  |  |  |  |  |  |  |  |  |  |  |  |  |  |  |  |  |  |  |  |  |  |  |  |  |  |  |  |  |  |  |  |  |  |  |  |  |  |  |  |  |  |  |  |  |  |  |  |  |  |  |  |  |  |  |  |  |  |  |  |  |  |  |  |  |  |  |  |  |  |  |  |  |  |  |  |  |  |  |  |  |  |  |  |  |  |  |  |  |  |  |  |  |  |  |  |  |  |  |  |  |  |  |  |  |  |  |  |  |  |  |  |  |  |  |  |  |  |  |  |  |  |  |  |  |  |  |  |  |  |  |  |  |  |  |  |  |  |  |  |  |  |  |  |  |  |  |  |  |  |  |  |  |  |  |  |  |  |  |  |  |  |  |  |  |  |  |  |  |  |  |  |  |  |  |  |  |  |  |  |  |  |  |  |  |  |  |  |  |  |  |  |  |  |  |  |  |  |  |  |  |  |  |  |  |  |  |  |  |  |  |  |  |  |  |  |  |  |  |  |  |  |  |  |  |  |  |  |  |  |  |  |  |  |  |  |  |  |  |  |  |  |  |  |  |  |  |  |  |  |  |  |  |  |  |  |  |  |  |  |  |  |  |  |  |  |  |  |  |  |  |  |  |  |  |  |  |  |  |  |  |  |  |  |  |  |  |  |  |  |  |  |  |  |  |  |  |  |  |  |  |  |  |  |  |  |  |  |  |  |  |  |  |  |  |  |  |  |  |  |  |  |  |  |  |  |  |  |  |  |  |  |  |  |  |  |  |  |  |  |  |  |  |  |  |  |  |  |  |  |  |  |  |  |  |  |  |  |  |  |  |  |  |  |  |  |  |  |  |  |  |  |  |  |  |  |  |  |  |  |  |  |  |  |  |  |  |  |  |  |  |  |  |  |  |  |  |  |  |  |  |  |  |  |  |  |  |  |  |  |  |  |  |  |  |  |  |  |  |  |  |  |  |  |  |  |  |  |  |  |  |  |  |  |  |  |  |  |  |  |  |  |  |  |  |  |  |  |  |  |  |  |  |  |  |  |  |  |  |  |  |  |  |  |  |  |  |  |  |  |  |  |  |  |  |  |  |  |  |  |  |  |  |  |  |  |  |  |  |  |  |  |  |  |  |  |  |  |  |  |  |  |  |  |  |  |  |  |  |  |  |  |  |  |  |  |  |  |  |  |  |  |  |  |  |  |  |  |  |  |  |  |  |  |  |  |  |  |  |  |  |  |  |  |  |  |  |  |  |  |  |  |  |  |  |  |  |  |  |  |  |  |  |  |  |  |  |  |  |  |  |  |  |  |  |  |  |  |  |  |  |  |  |  |  |  |  |  |  |  |  |  |  |  |  |  |  |  |  |  |  |  |  |  |  |  |  |  |  |  |  |  |  |  |  |  |  |  |  |  |  |  |  |  |  |  |  |  |  |  |  |  |  |  |  |  |  |  |  |  |  |  |  |  |  |  |  |  |  |  |  |  |  |  |  |  |  |  |  |  |  |  |  |  |  |  |  |  |  |  |  |  |  |  |  |  |  |  |  |  |  |  |  |  |  |  |  |  |  |  |  |  |  |  |  |  |  |  |  |  |  |  |  |  |  |  |  |  |  |  |  |  |  |  |  |  |  |  |  |  |  |  |  |  |  |  |  |  |  |  |  |  |  |  |  |  |  |  |  |  |  |  |  |  |  |  |  |  |  |  |  |  |  |  |  |  |  |  |  |  |  |  |  |  |  |  |  |  |  |  |  |  |  |  |  |  |  |  |  |  |  |  |  |  |  |  |  |  |  |  |  |  |  |  |  |  |  |  |  |  |  |  |  |  |  |  |  |  |  |  |  |  |  |  |  |  |  |  |  |  |  |  |  |  |  |  |  |  |  |  |  |  |  |  |  |  |  |  |  |  |  |  |  |  |  |  |  |  |  |  |  |  |  |  |  |  |  |  |  |  |  |  |  |  |  |  |  |  |  |  |  |  |  |  |  |  |  |  |  |  |  |  |  |  |  |  |  |  |  |  |  |  |  |  |  |  |  |  |  |  |  |  |  |  |  |  |  |  |  |  |  |  |  |  |  |  |  |  |  |  |  |  |  |  |  |  |  |  |  |  |  |  |  |  |  |  |  |  |  |  |  |  |  |  |  |  |  |  |  |  |  |  |  |  |  |  |  |  |  |  |  |  |  |  |  |  |  |  |  |  |  |  |  |  |  |  |  |  |  |  |  |  |  |  |  |  |  |  |  |  |  |  |  |  |  |  |  |  |  |  |  |  |  |  |  |  |  |  |  |  |  |  |  |  |  |  |  |  |  |  |  |  |  |  |  |  |  |  |  |  |  |  |  |  |  |  |  |  |  |  |  |  |  |  |  |  |  |  |  |  |  |  |  |  |  |  |  |  |  |  |  |  |  |  |  |  |  |  |  |  |  |  |  |  |  |  |  |  |  |  |  |  |  |  |  |  |  |  |  |  |  |  |  |  |  |  |  |  |  |  |  |  |  |  |  |  |  |  |  |  |  |  |  |  |  |  |  |  |  |  |  |  |  |  |  |  |  |  |  |  |  |  |  |  |  |  |  |  |  |  |  |  |  |  |  |  |  |  |  |  |  |  |  |  |  |  |  |  |  |  |  |  |  |  |  |  |  |  |  |  |  |  |  |  |  |  |  |  |  |  |  |  |  |  |  |  |  |  |  |  |  |  |  |  |  |  |  |  |  |  |  |  |  |  |  |  |  |  |  |  |  |  |  |  |  |  |  |  |  |  |  |  |  |  |  |  |  |  |  |  |  |  |  |  |  |  |  |  |  |  |  |  |  |  |  |  |  |  |  |  |  |  |  |  |  |  |  |  |  |  |  |  |  |  |  |  |  |  |  |  |  |  |  |  |  |  |  |  |  |  |  |  |  |  |  |  |  |  |  |  |  |  |  |  |  |  |  |  |  |  |  |  |  |  |  |  |  |  |  |  |  |  |  |  |  |  |  |  |  |  |  |  |  |  |  |  |  |  |  |  |  |  |  |  |  |  |  |  |  |  |  |  |  |  |  |  |  |  |  |  |  |  |  |  |  |  |  |  |  |  |  |  |  |  |  |  |  |  |  |  |  |  |  |  |  |  |  |  |  |  |  |  |  |  |  |  |  |  |  |  |  |  |  |  |  |  |  |  |  |  |  |  |  |  |  |  |  |  |  |  |  |  |  |  |  |  |  |  |  |  |  |  |  |  |  |  |  |  |  |  |  |  |  |  |  |  |  |  |  |  |  |  |  |  |  |  |  |  |  |  |  |  |  |  |  |  |  |  |  |  |  |  |  |  |  |  |  |  |  |  |  |  |  |  |  |  |  |  |  |  |  |  |  |  |  |  |  |  |  |  |  |  |  |  |  |  |  |  |  |  |  |  |  |  |  |  |  |  |  |  |  |  |  |  |  |  |  |  |  |  |  |  |  |  |  |  |  |  |  |  |  |  |  |  |  |  |  |  |  |  |  |  |  |  |  |  |  |  |  |  |  |  |  |  |  |  |  |  |  |  |  |  |  |  |  |  |  |  |  |  |  |  |  |  |  |  |  |  |  |  |  |  |  |  |  |  |  |  |  |  |  |  |  |  |  |  |  |  |  |  |  |  |  |  |  |  |  |  |  |  |  |  |  |  |  |  |  |  |  |  |  |  |  |  |  |  |  |  |  |  |  |  |  |  |  |  |  |  |  |  |  |  |  |  |  |  |  |  |  |  |  |  |  |  |  |  |  |  |  |  |  |  |  |  |  |  |  |  |  |  |  |  |  |  |  |  |  |  |  |  |  |  |  |  |  |  |  |  |  |  |  |  |  |  |  |  |  |  |  |  |  |  |  |  |  |  |  |  |  |  |  |  |  |  |  |  |  |  |  |  |  |  |  |  |  |  |  |  |  |  |  |  |  |  |  |  |  |  |  |  |  |  |  |  |  |  |  |  |  |  |  |  |  |  |  |  |  |  |  |  |  |  |  |  |  |  |  |  |  |  |  |  |  |  |  |  |  |  |  |  |  |  |  |  |  |  |  |  |  |  |  |  |  |  |  |  |  |  |  |  |  |  |  |  |  |  |  |  |  |  |  |  |  |  |  |  |  |  |  |  |  |  |  |  |  |  |  |  |  |  |  |  |  |  |  |  |  |  |  |  |  |  |  |  |  |  |  |  |  |  |  |  |  |  |  |  |  |  |  |  |  |  |  |  |  |  |  |  |  |  |  |  |  |  |  |  |  |  |  |  |  |  |  |  |  |  |  |  |  |  |  |  |  |  |  |  |  |  |  |  |  |  |  |  |  |  |  |  |  |  |  |  |  |  |  |  |  |  |  |  |  |  |  |  |  |  |  |  |  |  |  |  |  |  |  |  |  |  |  |  |  |  |  |  |  |  |  |  |  |  |  |  |  |  |  |  |  |  |  |  |  |  |  |  |  |  |  |  |  |  |  |  |  |  |  |  |  |  |  |  |  |  |  |  |  |  |  |  |  |  |  |  |  |  |  |  |  |  |  |  |  |  |  |  |  |  |  |  |  |  |  |  |  |  |  |  |  |  |  |  |  |  |  |  |  |  |  |  |  |  |  |  |  |  |  |  |  |  |  |  |  |  |  |  |  |  |  |  |  |  |  |  |  |  |  |  |  |  |  |  |  |  |  |  |  |  |  |  |  |  |  |  |  |  |  |  |  |  |  |  |  |  |  |  |  |  |  |  |  |  |  |  |  |  |  |  |  |  |  |  |  |  |  |  |  |  |  |  |  |  |  |  |  |  |  |  |  |  |  |  |  |  |  |  |  |  |  |  |  |  |  |  |  |  |  |  |  |  |  |  |  |  |  |  |  |  |  |  |  |  |  |  |  |  |  |  |  |  |  |  |  |  |  |  |  |  |  |  |  |  |  |  |  |  |  |  |  |  |  |  |  |  |  |  |  |  |  |  |  |  |  |  |  |  |  |  |  |  |  |  |  |  |  |  |  |  |  |  |  |  |  |  |  |  |  |  |  |  |  |  |  |  |  |  |  |  |  |  |  |  |  |  |  |  |  |  |  |  |  |  |  |  |  |  |  |  |  |  |  |  |  |  |  |  |  |  |  |  |  |  |  |  |  |  |  |  |  |  |  |  |  |  |  |  |  |  |  |  |  |  |  |  |  |  |  |  |  |  |  |  |  |  |  |  |  |  |  |  |  |  |  |  |  |  |  |  |  |  |  |  |  |  |  |  |  |  |  |  |  |  |  |  |  |  |  |  |  |  |  |  |  |  |  |  |  |  |  |  |  |  |  |  |  |  |  |  |  |  |  |  |  |  |  |  |  |  |  |  |  |  |  |  |  |  |  |  |  |  |  |  |  |  |  |  |  |  |  |  |  |  |  |  |  |  |  |  |  |  |  |  |  |  |  |  |  |  |  |  |  |  |  |  |  |  |  |  |  |  |  |  |  |  |  |  |  |  |  |  |  |  |  |  |  |  |  |  |  |  |  |  |  |  |  |  |  |  |  |  |  |  |  |  |  |  |  |  |  |  |  |  |  |  |  |  |  |  |  |  |  |  |  |  |  |  |  |  |  |  |  |  |  |  |  |  |  |  |  |  |  |  |  |  |  |  |  |  |  |  |  |  |  |  |  |  |  |  |  |  |  |  |  |  |  |  |  |  |  |  |  |  |  |  |  |  |  |  |  |  |  |  |  |  |  |  |  |  |  |  |  |  |  |  |  |  |  |  |  |  |  |  |  |  |  |  |  |  |  |  |  |  |  |  |  |  |  |  |  |  |  |  |  |  |  |  |  |  |  |  |  |  |  |  |  |  |  |  |  |  |  |  |  |  |  |  |  |  |  |  |  |  |  |  |  |  |  |  |  |  |  |  |  |  |  |  |  |  |  |  |  |  |  |  |  |  |  |  |  |  |  |  |  |  |  |  |  |  |  |  |  |  |  |  |  |  |  |  |  |  |  |  |  |  |  |  |  |  |  |  |  |  |  |  |  |  |  |  |  |  |  |  |  |  |  |  |  |  |  |  |  |  |  |  |  |  |  |  |  |  |  |  |  |  |  |  |  |  |  |  |  |  |  |  |  |  |  |  |  |  |  |  |  |  |  |  |  |  |  |  |  |  |  |  |  |  |  |  |  |  |  |  |  |  |  |  |  |  |  |  |  |  |  |  |  |  |  |  |  |  |  |  |  |  |  |  |  |  |  |  |  |  |  |  |  |  |  |  |  |  |  |  |  |  |  |  |  |  |  |  |  |  |  |  |  |  |  |  |  |  |  |  |  |  |  |  |  |  |  |  |  |  |  |  |  |  |  |  |  |  |  |  |  |  |  |  |  |  |  |  |  |  |  |  |  |  |  |  |  |  |  |  |  |  |  |  |  |  |  |  |  |  |  |  |  |  |  |  |  |  |  |  |  |  |  |  |  |  |  |  |  |  |  |  |  |  |  |  |  |  |  |  |  |  |  |  |  |  |  |  |  |  |  |  |  |  |  |  |  |  |  |  |  |  |  |  |  |  |  |  |  |  |  |  |  |  |  |  |  |  |  |  |  |  |  |  |  |  |  |  |  |  |  |  |  |  |  |  |  |  |  |  |  |  |  |  |  |  |  |  |  |  |  |  |  |  |  |  |  |  |  |  |  |  |  |  |  |  |  |  |  |  |  |  |  |  |  |  |  |  |  |  |  |  |  |  |  |  |  |  |  |  |  |  |  |  |  |  |  |  |  |  |  |  |  |  |  |  |  |  |  |  |  |  |  |  |  |  |  |  |  |  |  |  |  |  |  |  |  |  |  |  |  |  |  |  |  |  |  |  |  |  |  |  |  |  |  |  |  |  |  |  |  |  |  |  |  |  |  |  |  |  |  |  |  |  |  |  |  |  |  |  |  |  |  |  |  |  |  |  |  |  |  |  |  |  |  |  |  |  |  |  |  |  |  |  |  |  |  |  |  |  |  |  |  |  |  |  |  |  |  |  |  |  |  |  |  |  |  |  |  |  |  |  |  |  |  |  |  |  |  |  |  |  |  |  |  |  |  |  |  |  |  |  |  |  |  |  |  |  |  |  |  |  |  |  |  |  |  |  |  |  |  |  |  |  |  |  |  |  |  |  |  |  |  |  |  |  |  |  |  |  |  |  |  |  |  |  |  |  |  |  |  |  |  |  |  |  |  |  |  |  |  |  |  |  |  |  |  |  |  |  |  |  |  |  |  |  |  |  |  |  |  |  |  |  |  |  |  |  |  |  |  |  |  |  |  |  |  |  |  |  |  |  |  |  |  |  |  |  |  |  |  |  |  |  |  |  |  |  |  |  |  |  |  |  |  |  |  |  |  |  |  |  |  |  |  |  |  |  |  |  |  |  |  |  |  |  |  |  |  |  |  |  |  |  |  |  |  |  |  |  |  |  |  |  |  |  |  |  |  |  |  |  |  |  |  |  |  |  |  |  |  |  |  |  |  |  |  |  |  |  |  |  |  |  |  |  |  |  |  |  |  |  |  |  |  |  |  |  |  |  |  |  |  |  |  |  |  |  |  |  |  |  |  |  |  |  |  |  |  |  |  |  |  |  |  |  |  |  |  |  |  |  |  |  |  |  |  |  |  |  |  |  |  |  |  |  |  |  |  |  |  |  |  |  |  |  |  |  |  |  |  |  |  |  |  |  |  |  |  |  |  |  |  |  |  |  |  |  |  |  |  |  |  |  |  |  |  |  |  |  |  |  |  |  |  |  |  |  |  |  |  |  |  |  |  |  |  |  |  |  |  |  |  |  |  |  |  |  |  |  |  |  |  |  |  |  |  |  |  |  |  |  |  |  |  |  |  |  |  |  |  |  |  |  |  |  |  |  |  |  |  |  |  |  |  |  |  |  |  |  |  |  |  |  |  |  |  |  |  |  |  |  |  |  |  |  |  |  |  |  |  |  |  |  |  |  |  |  |  |  |  |  |  |  |  |  |  |  |  |  |  |  |  |  |  |  |  |  |  |  |  |  |  |  |  |  |  |  |  |  |  |  |  |  |  |  |  |  |  |  |  |  |  |  |  |  |  |  |  |  |  |  |  |  |  |  |  |  |  |  |  |  |  |  |  |  |  |  |  |  |  |  |  |  |  |  |  |  |  |  |  |  |  |  |  |  |  |  |  |  |  |  |  |  |  |  |  |  |  |  |  |  |  |  |  |  |  |  |  |  |  |  |  |  |  |  |  |  |  |  |  |  |  |  |  |  |  |  |  |  |  |  |  |  |  |  |  |  |  |  |  |  |  |  |  |  |  |  |  |  |  |  |  |  |  |  |  |  |  |  |  |  |  |  |  |  |  |  |  |  |  |  |  |  |  |  |  |  |  |  |  |  |  |  |  |  |  |  |  |  |  |  |  |  |  |  |  |  |  |  |  |  |  |  |  |  |  |  |  |  |  |  |  |  |  |  |  |  |  |  |  |  |  |  |  |  |  |  |  |  |  |  |  |  |  |  |  |  |  |  |  |  |  |  |  |  |  |  |  |  |  |  |  |  |  |  |  |  |  |  |  |  |  |  |  |  |  |  |  |  |  |  |  |  |  |  |  |  |  |  |  |  |  |  |  |  |  |  |  |  |  |  |  |  |  |  |  |  |  |  |  |  |  |  |  |  |  |  |  |  |  |  |  |  |  |  |  |  |  |  |  |  |  |  |  |  |  |  |  |  |  |  |  |  |  |  |  |  |  |  |  |  |  |  |  |  |  |  |  |  |  |  |  |  |  |  |  |  |  |  |  |  |  |  |  |  |  |  |  |  |  |  |  |  |  |  |  |  |  |  |  |  |  |  |  |  |  |  |  |  |  |  |  |  |  |  |  |  |  |  |  |  |  |  |  |  |  |  |  |  |  |  |  |  |  |  |  |  |  |  |  |  |  |  |  |  |  |  |  |  |  |  |  |  |  |  |  |  |  |  |  |  |  |  |  |  |  |  |  |  |  |  |  |  |  |  |  |  |  |  |  |  |  |  |  |  |  |  |  |  |  |  |  |  |  |  |  |  |  |  |  |  |  |  |  |  |  |  |  |  |  |  |  |  |  |  |  |  |  |  |  |  |  |  |  |  |  |  |  |  |  |  |  |  |  |  |  |  |  |  |  |  |  |  |  |  |  |  |  |  |  |  |  |  |  |  |  |  |  |  |  |  |  |  |  |  |  |  |  |  |  |  |  |  |  |  |  |  |  |  |  |  |  |  |  |  |  |  |  |  |  |  |  |  |  |  |  |  |  |  |  |  |  |  |  |  |  |  |  |  |  |  |  |  |  |  |  |  |  |  |  |  |  |  |  |  |  |  |  |  |  |  |  |  |  |  |  |  |  |  |  |  |  |  |  |  |  |  |  |  |  |  |  |  |  |  |  |  |  |  |  |  |  |  |  |  |  |  |  |  |  |  |  |  |  |  |  |  |  |  |  |  |  |  |  |  |  |  |  |  |  |  |  |  |  |  |  |  |  |  |  |  |  |  |  |  |  |  |  |  |  |  |  |  |  |  |  |  |  |  |  |  |  |  |  |  |  |  |  |  |  |  |  |  |  |  |  |  |  |  |  |  |  |  |  |  |  |  |  |  |  |  |  |  |  |  |  |  |  |  |  |  |  |  |  |  |  |  |  |  |  |  |  |  |  |  |  |  |  |  |  |  |  |  |  |  |  |  |  |  |  |  |  |  |  |  |  |  |  |  |  |  |  |  |  |  |  |  |  |  |  |  |  |  |  |  |  |  |  |  |  |  |  |  |  |  |  |  |  |  |  |  |  |  |  |  |  |  |  |  |  |  |  |  |  |  |  |  |  |  |  |  |  |  |  |  |  |  |  |  |  |  |  |  |  |  |  |  |  |  |  |  |  |  |  |  |  |  |  |  |  |  |  |  |  |  |  |  |  |  |  |  |  |  |  |  |  |  |  |  |  |  |  |  |  |  |  |  |  |  |  |  |  |  |  |  |  |  |  |  |  |  |  |  |  |  |  |  |  |  |  |  |  |  |  |  |  |  |  |  |  |  |  |  |  |  |  |  |  |  |  |  |  |  |  |  |  |  |  |  |  |  |  |  |  |  |  |  |  |  |  |  |  |  |  |  |  |  |  |  |  |  |  |  |  |  |  |  |  |  |  |  |  |  |  |  |  |  |  |  |  |  |  |  |  |  |  |  |  |  |  |  |  |  |  |  |  |  |  |  |  |  |  |  |  |  |  |  |  |  |  |  |  |  |  |  |  |  |  |  |  |  |  |  |  |  |  |  |  |  |  |  |  |  |  |  |  |  |  |  |  |  |  |  |  |  |  |  |  |  |  |  |  |  |  |  |  |  |  |  |  |  |  |  |  |  |  |  |  |  |  |  |  |  |  |  |  |  |  |  |  |  |  |  |  |  |  |  |  |  |  |  |  |  |  |  |  |  |  |  |  |  |  |  |  |  |  |  |  |  |  |  |  |  |  |  |  |  |  |  |  |  |  |  |  |  |  |  |  |  |  |  |  |  |  |  |  |  |  |  |  |  |  |  |  |  |  |  |  |  |  |  |  |  |  |  |  |  |  |  |  |  |  |  |  |  |  |  |  |  |  |  |  |  |  |  |  |  |  |  |  |  |  |  |  |  |  |  |  |  |  |  |  |  |  |  |  |  |  |  |  |  |  |  |  |  |  |  |  |  |  |  |  |  |  |  |  |  |  |  |  |  |  |  |  |  |  |  |  |  |  |  |  |  |  |  |  |  |  |  |  |  |  |  |  |  |  |  |  |  |  |  |  |  |  |  |  |  |  |  |  |  |  |  |  |  |  |  |  |  |  |  |  |  |  |  |  |  |  |  |  |  |  |  |  |  |  |  |  |  |  |  |  |  |  |  |  |  |  |  |  |  |  |  |  |  |  |  |  |  |  |  |  |  |  |  |  |  |  |  |  |  |  |  |  |  |  |  |  |  |  |  |  |  |  |  |  |  |  |  |  |  |  |  |  |  |  |  |  |  |  |  |  |  |  |  |  |  |  |  |  |  |  |  |  |  |  |  |  |  |  |  |  |  |  |  |  |  |  |  |  |  |  |  |  |  |  |  |  |  |  |  |  |  |  |  |  |  |  |  |  |  |  |  |  |  |  |  |  |  |  |  |  |  |  |  |  |  |  |  |  |  |  |  |  |  |  |  |  |  |  |  |  |  |  |  |  |  |  |  |  |  |  |  |  |  |  |  |  |  |  |  |  |  |  |  |  |  |  |  |  |  |  |  |  |  |  |  |  |  |  |  |  |  |  |  |  |  |  |  |  |  |  |  |  |  |  |  |  |  |  |  |  |  |  |  |  |  |  |  |  |  |  |  |  |  |  |  |  |  |  |  |  |  |  |  |  |  |  |  |  |  |  |  |  |  |  |  |  |  |  |  |  |  |  |  |  |  |  |  |  |  |  |  |  |  |  |  |  |  |  |  |  |  |  |  |  |  |  |  |  |  |  |  |  |  |  |  |  |  |  |  |  |  |  |  |  |  |  |  |  |  |  |  |  |  |  |  |  |  |  |  |  |  |  |  |  |  |  |  |  |  |  |  |  |  |  |  |  |  |  |  |  |  |  |  |  |  |  |  |  |  |  |  |  |  |  |  |  |  |  |  |  |  |  |  |  |  |  |  |  |  |  |  |  |  |  |  |  |  |  |  |  |  |  |  |  |  |  |  |  |  |  |  |  |  |  |  |  |  |  |  |  |  |  |  |  |  |  |  |  |  |  |  |  |  |  |  |  |  |  |  |  |  |  |  |  |  |  |  |  |  |  |  |  |  |  |  |  |  |  |  |  |  |  |  |  |  |  |  |  |  |  |  |  |  |  |  |  |  |  |  |  |  |  |  |  |  |  |  |  |  |  |  |  |  |  |  |  |  |  |  |  |  |  |  |  |  |  |  |  |  |  |  |  |  |  |  |  |  |  |  |  |  |  |  |  |  |  |  |  |  |  |  |  |  |  |  |  |  |  |  |  |  |  |  |  |  |  |  |  |  |  |  |  |  |  |  |  |  |  |  |  |  |  |  |  |  |  |  |  |  |  |  |  |  |  |  |  |  |  |  |  |  |  |  |  |  |  |  |  |  |  |  |  |  |  |  |  |  |  |  |  |  |  |  |  |  |  |  |  |  |  |  |  |  |  |  |  |  |  |  |  |  |  |  |  |  |  |  |  |  |  |  |  |  |  |  |  |  |  |  |  |  |  |  |  |  |  |  |  |  |  |  |  |  |  |  |  |  |  |  |  |  |  |  |  |  |  |  |  |  |  |  |  |  |  |  |  |  |  |  |  |  |  |  |  |  |  |  |  |  |  |  |  |  |  |  |  |  |  |  |  |  |  |  |  |  |  |  |  |  |  |  |  |  |  |  |  |  |  |  |  |  |  |  |  |  |  |  |  |  |  |  |  |  |  |  |  |  |  |  |  |  |  |  |  |  |  |  |  |  |  |  |  |  |  |  |  |  |  |  |  |  |  |  |  |  |  |  |  |  |  |  |  |  |  |  |  |  |  |  |  |  |  |  |  |  |  |  |  |  |  |  |  |  |  |  |  |  |  |  |  |  |  |  |  |  |  |  |  |  |  |  |  |  |  |  |  |  |  |  |  |  |  |  |  |  |  |  |  |  |  |  |  |  |  |  |  |  |  |  |  |  |  |  |  |  |  |  |  |  |  |  |  |  |  |  |  |  |  |  |  |  |  |  |  |  |  |  |  |  |  |  |  |  |  |  |  |  |  |  |  |  |  |  |  |  |  |  |  |  |  |  |  |  |  |  |  |  |  |  |  |  |  |  |  |  |  |  |  |  |  |  |  |  |  |  |  |  |  |  |  |  |  |  |  |  |  |  |  |  |  |  |  |  |  |  |  |  |  |  |  |  |  |  |  |  |  |  |  |  |  |  |  |  |  |  |  |  |  |  |  |  |  |  |  |  |  |  |  |  |  |  |  |  |  |  |  |  |  |  |  |  |  |  |  |  |  |  |  |  |  |  |  |  |  |  |  |  |  |  |  |  |  |  |  |  |  |  |  |  |  |  |  |  |  |  |  |  |  |  |  |  |  |  |  |  |  |  |  |  |  |  |  |  |  |  |  |  |  |  |  |  |  |  |  |  |  |  |  |  |  |  |  |  |  |  |  |  |  |  |  |  |  |  |  |  |  |  |  |  |  |  |  |  |  |  |  |  |  |  |  |  |  |  |  |  |  |  |  |  |  |  |  |  |  |  |  |  |  |  |  |  |  |  |  |  |  |  |  |  |  |  |  |  |  |  |  |  |  |  |  |  |  |  |  |  |  |  |  |  |  |  |  |  |  |  |  |  |  |  |  |  |  |  |  |  |  |  |  |  |  |  |  |  |  |  |  |  |  |  |  |  |  |  |  |  |  |  |  |  |  |  |  |  |  |  |  |  |  |  |  |  |  |  |  |  |  |  |  |  |  |  |  |  |  |  |  |  |  |  |  |  |  |  |  |  |  |  |  |  |  |  |  |  |  |  |  |  |  |  |  |  |  |  |  |  |  |  |  |  |  |  |  |  |  |  |  |  |  |  |  |  |  |  |  |  |  |  |  |  |  |  |  |  |  |  |  |  |  |  |  |  |  |  |  |  |  |  |  |  |  |  |  |  |  |  |  |  |  |  |  |  |  |  |  |  |  |  |  |  |  |  |  |  |  |  |  |  |  |  |  |  |  |  |  |  |  |  |  |  |  |  |  |  |  |  |  |  |  |  |  |  |  |  |  |  |  |  |  |  |  |  |  |  |  |  |  |  |  |  |  |  |  |  |  |  |  |  |  |  |  |  |  |  |  |  |  |  |  |  |  |  |  |  |  |  |  |  |  |  |  |  |  |  |  |  |  |  |  |  |  |  |  |  |  |  |  |  |  |  |  |  |  |  |  |  |  |  |  |  |  |  |  |  |  |  |  |  |  |  |  |  |  |  |  |  |  |  |  |  |  |  |  |  |  |  |  |  |  |  |  |  |  |  |  |  |  |  |  |  |  |  |  |  |  |  |  |  |  |  |  |  |  |  |  |  |  |  |  |  |  |  |  |  |  |  |  |  |  |  |  |  |  |  |  |  |  |  |  |  |  |  |  |  |  |  |  |  |  |  |  |  |  |  |  |  |  |  |  |  |  |  |  |  |  |  |  |  |  |  |  |  |  |  |  |  |  |  |  |  |  |  |  |  |  |  |  |  |  |  |  |  |  |  |  |  |  |  |  |  |  |  |  |  |  |  |  |  |  |  |  |  |  |  |  |  |  |  |  |  |  |  |  |  |  |  |  |  |  |  |  |  |  |  |  |  |  |  |  |  |  |  |  |  |  |  |  |  |  |  |  |  |  |  |  |  |  |  |  |  |  |  |  |  |  |  |  |  |  |  |  |  |  |  |  |  |  |  |  |  |  |  |  |  |  |  |  |  |  |  |  |  |  |  |  |  |  |  |  |  |  |  |  |  |  |  |  |  |  |  |  |  |  |  |  |  |  |  |  |  |  |  |  |  |  |  |  |  |  |  |  |  |  |  |  |  |  |  |  |  |  |  |  |  |  |  |  |  |  |  |  |  |  |  |  |  |  |  |  |  |  |  |  |  |  |  |  |  |  |  |  |  |  |  |  |  |  |  |  |  |  |  |  |  |  |  |  |  |  |  |  |  |  |  |  |  |  |  |  |  |  |  |  |  |  |  |  |  |  |  |  |  |  |  |  |  |  |  |  |  |  |  |  |  |  |  |  |  |  |  |  |  |  |  |  |  |  |  |  |  |  |  |  |  |  |  |  |  |  |  |  |  |  |  |  |  |  |  |  |  |  |  |  |  |  |  |  |  |  |  |  |  |  |  |  |  |  |  |  |  |  |  |  |  |  |  |  |  |  |  |  |  |  |  |  |  |  |  |  |  |  |  |  |  |  |  |  |  |  |  |  |  |  |  |  |  |  |  |  |  |  |  |  |  |  |  |  |  |  |  |  |  |  |  |  |  |  |  |  |  |  |  |  |  |  |  |  |  |  |  |  |  |  |  |  |  |  |  |  |  |  |  |  |  |  |  |  |  |  |  |  |  |  |  |  |  |  |  |  |  |  |  |  |  |  |  |  |  |  |  |  |  |  |  |  |  |  |  |  |  |  |  |  |  |  |  |  |  |  |  |  |  |  |  |  |  |  |  |  |  |  |  |  |  |  |  |  |  |  |  |  |  |  |  |  |  |  |  |  |  |  |  |  |  |  |  |  |  |  |  |  |  |  |  |  |  |  |  |  |  |  |  |  |  |  |  |  |  |  |  |  |  |  |  |  |  |  |  |  |  |  |  |  |  |  |  |  |  |  |  |  |  |  |  |  |  |  |  |  |  |  |  |  |  |  |  |  |  |  |  |  |  |  |  |  |  |  |  |  |  |  |  |  |  |  |  |  |  |  |  |  |  |  |  |  |  |  |  |  |  |  |  |  |  |  |  |  |  |  |  |  |  |  |  |  |  |  |  |  |  |  |  |  |  |  |  |  |  |  |  |  |  |  |  |  |  |  |  |  |  |  |  |  |  |  |  |  |  |  |  |  |  |  |  |  |  |  |  |  |  |  |  |  |  |  |  |  |  |  |  |  |  |  |  |  |  |  |  |  |  |  |  |  |  |  |  |  |  |  |  |  |  |  |  |  |  |  |  |  |  |  |  |  |  |  |  |  |  |  |  |  |  |  |  |  |  |  |  |  |  |  |  |  |  |  |  |  |  |  |  |  |  |  |  |  |  |  |  |  |  |  |  |  |  |  |  |  |  |  |  |  |  |  |  |  |  |  |  |  |  |  |  |  |  |  |  |  |  |  |  |  |  |  |  |  |  |  |  |  |  |  |  |  |  |  |  |  |  |  |  |  |  |  |  |  |  |  |  |  |  |  |  |  |  |  |  |  |  |  |  |  |  |  |  |  |  |  |  |  |  |  |  |  |  |  |  |  |  |  |  |  |  |  |  |  |  |  |  |  |  |  |  |  |  |  |  |  |  |  |  |  |  |  |  |  |  |  |  |  |  |  |  |  |  |  |  |  |  |  |  |  |  |  |  |  |  |  |  |  |  |  |  |  |  |  |  |  |  |  |  |  |  |  |  |  |  |  |  |  |  |  |  |  |  |  |  |  |  |  |  |  |  |  |  |  |  |  |  |  |  |  |  |  |  |  |  |  |  |  |  |  |  |  |  |  |  |  |  |  |  |  |  |  |  |  |  |  |  |  |  |  |  |  |  |  |  |  |  |  |  |  |  |  |  |  |  |  |  |  |  |  |  |  |  |  |  |  |  |  |  |  |  |  |  |  |  |  |  |  |  |  |  |  |  |  |  |  |  |  |  |  |  |  |  |  |  |  |  |  |  |  |  |  |  |  |  |  |  |  |  |  |  |  |  |  |  |  |  |  |  |  |  |  |  |  |  |  |  |  |  |  |  |  |  |  |  |  |  |  |  |  |  |  |  |  |  |  |  |  |  |  |  |  |  |  |  |  |  |  |  |  |  |  |  |  |  |  |  |  |  |  |  |  |  |  |  |  |  |  |  |  |  |  |  |  |  |  |  |  |  |  |  |  |  |  |  |  |  |  |  |  |  |  |  |  |  |  |  |  |  |  |  |  |  |  |  |  |  |  |  |  |  |  |  |  |  |  |  |  |  |  |  |  |  |  |  |  |  |  |  |  |  |  |  |  |  |  |  |  |  |  |  |  |  |  |  |  |  |  |  |  |  |  |  |  |  |  |  |  |  |  |  |  |  |  |  |  |  |  |  |  |  |  |  |  |  |  |  |  |  |  |  |  |  |  |  |  |  |  |  |  |  |  |  |  |  |  |  |  |  |  |  |  |  |  |  |  |  |  |  |  |  |  |  |  |  |  |  |  |  |  |  |  |  |  |  |  |  |  |  |  |  |  |  |  |  |  |  |  |  |  |  |  |  |  |  |  |  |  |  |  |  |  |  |  |  |  |  |  |  |  |  |  |  |  |  |  |  |  |  |  |  |  |  |  |  |  |  |  |  |  |  |  |  |  |  |  |  |  |  |  |  |  |  |  |  |  |  |  |  |  |  |  |  |  |  |  |  |  |  |  |  |  |  |  |  |  |  |  |  |  |  |  |  |  |  |  |  |  |  |  |  |  |  |  |  |  |  |  |  |  |  |  |  |  |  |  |  |  |  |  |  |  |  |  |  |  |  |  |  |  |  |  |  |  |  |  |  |  |  |  |  |  |  |  |  |  |  |  |  |  |  |  |  |  |  |  |  |  |  |  |  |  |  |  |  |  |  |  |  |  |  |  |  |  |  |  |  |  |  |  |  |  |  |  |  |  |  |  |  |  |  |  |  |  |  |  |  |  |  |  |  |  |  |  |  |  |  |  |  |  |  |  |  |  |  |  |  |  |  |  |  |  |  |  |  |  |  |  |  |  |  |  |  |  |  |  |  |  |  |  |  |  |  |  |  |  |  |  |  |  |  |  |  |  |  |  |  |  |  |  |  |  |  |  |  |  |  |  |  |  |  |  |  |  |  |  |  |  |  |  |  |  |  |  |  |  |  |  |  |  |  |  |  |  |  |  |  |  |  |  |  |  |  |  |  |  |  |  |  |  |  |  |  |  |  |  |  |  |  |  |  |  |  |  |  |  |  |  |  |  |  |  |  |  |  |  |  |  |  |  |  |  |  |  |  |  |  |  |  |  |  |  |  |  |  |  |  |  |  |  |  |  |  |  |  |  |  |  |  |  |  |  |  |  |  |  |  |  |  |  |  |  |  |  |  |  |  |  |  |  |  |  |  |  |  |  |  |  |  |  |  |  |  |  |  |  |  |  |  |  |  |  |  |  |  |  |  |  |  |  |  |  |  |  |  |  |  |  |  |  |  |  |  |  |  |  |  |  |  |  |  |  |  |  |  |  |  |  |  |  |  |  |  |  |  |  |  |  |  |  |  |  |  |  |  |  |  |  |  |  |  |  |  |  |  |  |  |  |  |  |  |  |  |  |  |  |  |  |  |  |  |  |  |  |  |  |  |  |  |  |  |  |  |  |  |  |  |  |  |  |  |  |  |  |  |  |  |  |  |  |  |  |  |  |  |  |  |  |  |  |  |  |  |  |  |  |  |  |  |  |  |  |  |  |  |  |  |  |  |  |  |  |  |  |  |  |  |  |  |  |  |  |  |  |  |  |  |  |  |  |  |  |  |  |  |  |  |  |  |  |  |  |  |  |  |  |  |  |  |  |  |  |  |  |  |  |  |  |  |  |  |  |  |  |  |  |  |  |  |  |  |  |  |  |  |  |  |  |  |  |  |  |  |  |  |  |  |  |  |  |  |  |  |  |  |  |  |  |  |  |  |  |  |  |  |  |  |  |  |  |  |  |  |  |  |  |  |  |  |  |  |  |  |  |  |  |  |  |  |  |  |  |  |  |  |  |  |  |  |  |  |  |  |  |  |  |  |  |  |  |  |  |  |  |  |  |  |  |  |  |  |  |  |  |  |  |  |  |  |  |  |  |  |  |  |  |  |  |  |  |  |  |  |  |  |  |  |  |  |  |  |  |  |  |  |  |  |  |  |  |  |  |  |  |  |  |  |  |  |  |  |  |  |  |  |  |  |  |  |  |  |  |  |  |  |  |  |  |  |  |  |  |  |  |  |  |  |  |  |  |  |  |  |  |  |  |  |  |  |  |  |  |  |  |  |  |  |  |  |  |  |  |  |  |  |  |  |  |  |  |  |  |  |  |  |  |  |  |  |  |  |  |  |  |  |  |  |  |  |  |  |  |  |  |  |  |  |  |  |  |  |  |  |  |  |  |  |  |  |  |  |  |  |  |  |  |  |  |  |  |  |  |  |  |  |  |  |  |  |  |  |  |  |  |  |  |  |  |  |  |  |  |  |  |  |  |  |  |  |  |  |  |  |  |  |  |  |  |  |  |  |  |  |  |  |  |  |  |  |  |  |  |  |  |  |  |  |  |  |  |  |  |  |  |  |  |  |  |  |  |  |  |  |  |  |  |  |  |  |  |  |  |  |  |  |  |  |  |  |  |  |  |  |  |  |  |  |  |  |  |  |  |  |  |  |  |  |  |  |  |  |  |  |  |  |  |  |  |  |  |  |  |  |  |  |  |  |  |  |  |  |  |  |  |  |  |  |  |  |  |  |  |  |  |  |  |  |  |  |  |  |  |  |  |  |  |  |  |  |  |  |  |  |  |  |  |  |  |  |  |  |  |  |  |  |  |  |  |  |  |  |  |  |  |  |  |  |  |  |  |  |  |  |  |  |  |  |  |  |  |  |  |  |  |  |  |  |  |  |  |  |  |  |  |  |  |  |  |  |  |  |  |  |  |  |  |  |  |  |  |  |  |  |  |  |  |  |  |  |  |  |  |  |  |  |  |  |  |  |  |  |  |  |  |  |  |  |  |  |  |  |  |  |  |  |  |  |  |  |  |  |  |  |  |  |  |  |  |  |  |  |  |  |  |  |  |  |  |  |  |  |  |  |  |  |  |  |  |  |  |  |  |  |  |  |  |  |  |  |  |  |  |  |  |  |  |  |  |  |  |  |  |  |  |  |  |  |  |  |  |  |  |  |  |  |  |  |  |  |  |  |  |  |  |  |  |  |  |  |  |  |  |  |  |  |  |  |  |  |  |  |  |  |  |  |  |  |  |  |  |  |  |  |  |  |  |  |  |  |  |  |  |  |  |  |  |  |  |  |  |  |  |  |  |  |  |  |  |  |  |  |  |  |  |  |  |  |  |  |  |  |  |  |  |  |  |  |  |  |  |  |  |  |  |  |  |  |  |  |  |  |  |  |  |  |  |  |  |  |  |  |  |  |  |  |  |  |  |  |  |  |  |  |  |  |  |  |  |  |  |  |  |  |  |  |  |  |  |  |  |  |  |  |  |  |  |  |  |  |  |  |  |  |  |  |  |  |  |  |  |  |  |  |  |  |  |  |  |  |  |  |  |  |  |  |  |  |  |  |  |  |  |  |  |  |  |  |  |  |  |  |  |  |  |  |  |  |  |  |  |  |  |  |  |  |  |  |  |  |  |  |  |  |  |  |  |  |  |  |  |  |  |  |  |  |  |  |  |  |  |  |  |  |  |  |  |  |  |  |  |  |  |  |  |  |  |  |  |  |  |  |  |  |  |  |  |  |  |  |  |  |  |  |  |  |  |  |  |  |  |  |  |  |  |  |  |  |  |  |  |  |  |  |  |  |  |  |  |  |  |  |  |  |  |  |  |  |  |  |  |  |  |  |  |  |  |  |  |  |  |  |  |  |  |  |  |  |  |  |  |  |  |  |  |  |  |  |  |  |  |  |  |  |  |  |  |  |  |  |  |  |  |  |  |  |  |  |  |  |  |  |  |  |  |  |  |  |  |  |  |  |  |  |  |  |  |  |  |  |  |  |  |  |  |  |  |  |  |  |  |  |  |  |  |  |  |  |  |  |  |  |  |  |  |  |  |  |  |  |  |  |  |  |  |  |  |  |  |  |  |  |  |  |  |  |  |  |  |  |  |  |  |  |  |  |  |  |  |  |  |  |  |  |  |  |  |  |  |  |  |  |  |  |  |  |  |  |  |  |  |  |  |  |  |  |  |  |  |  |  |  |  |  |  |  |  |  |  |  |  |  |  |  |  |  |  |  |  |  |  |  |  |  |  |  |  |  |  |  |  |  |  |  |  |  |  |  |  |  |  |  |  |  |  |  |  |  |  |  |  |  |  |  |  |  |  |  |  |  |  |  |  |  |  |  |  |  |  |  |  |  |  |  |  |  |  |  |  |  |  |  |  |  |  |  |  |  |  |  |  |  |  |  |  |  |  |  |  |  |  |  |  |  |  |  |  |  |  |  |  |  |  |  |  |  |  |  |  |  |  |  |  |  |  |  |  |  |  |  |  |  |  |  |  |  |  |  |  |  |  |  |  |  |  |  |  |  |  |  |  |  |  |  |  |  |  |  |  |  |  |  |  |  |  |  |  |  |  |  |  |  |  |  |  |  |  |  |  |  |  |  |  |  |  |  |  |  |  |  |  |  |  |  |  |  |  |  |  |  |  |  |  |  |  |  |  |  |  |  |  |  |  |  |  |  |  |  |  |  |  |  |  |  |  |  |  |  |  |  |  |  |  |  |  |  |  |  |  |  |  |  |  |  |  |  |  |  |  |  |  |  |  |  |  |  |  |  |  |  |  |  |  |  |  |  |  |  |  |  |  |  |  |  |  |  |  |  |  |  |  |  |  |  |  |  |  |  |  |  |  |  |  |  |  |  |  |  |  |  |  |  |  |  |  |  |  |  |  |  |  |  |  |  |  |  |  |  |  |  |  |  |  |  |  |  |  |  |  |  |  |  |  |  |  |  |  |  |  |  |  |  |  |  |  |  |  |  |  |  |  |  |  |  |  |  |  |  |  |  |  |  |  |  |  |  |  |  |  |  |  |  |  |  |  |  |  |  |  |  |  |  |  |  |  |  |  |  |  |  |  |  |  |  |  |  |  |  |  |  |  |  |  |  |  |  |  |  |  |  |  |  |  |  |  |  |  |  |  |  |  |  |  |  |  |  |  |  |  |  |  |  |  |  |  |  |  |  |  |  |  |  |  |  |  |  |  |  |  |  |  |  |  |  |  |  |  |  |  |  |  |  |  |  |  |  |  |  |  |  |  |  |  |  |  |  |  |  |  |  |  |  |  |  |  |  |  |  |  |  |  |  |  |  |  |  |  |  |  |  |  |  |  |  |  |  |  |  |  |  |  |  |  |  |  |  |  |  |  |  |  |  |  |  |  |  |  |  |  |  |  |  |  |  |  |  |  |  |  |  |  |  |  |  |  |  |  |  |  |  |  |  |  |  |  |  |  |  |  |  |  |  |  |  |  |  |  |  |  |  |  |  |  |  |  |  |  |  |  |  |  |  |  |  |  |  |  |  |  |  |  |  |  |  |  |  |  |  |  |  |  |  |  |  |  |  |  |  |  |  |  |  |  |  |  |  |  |  |  |  |  |  |  |  |  |  |  |  |  |  |  |  |  |  |  |  |  |  |  |  |  |  |  |  |  |  |  |  |  |  |  |  |  |  |  |  |  |  |  |  |  |  |  |  |  |  |  |  |  |  |  |  |  |  |  |  |  |  |  |  |  |  |  |  |  |  |  |  |  |  |  |  |  |  |  |  |  |  |  |  |  |  |  |  |  |  |  |  |  |  |  |  |  |  |  |  |  |  |  |  |  |  |  |  |  |  |  |  |  |  |  |  |  |  |  |  |  |  |  |  |  |  |  |  |  |  |  |  |  |  |  |  |  |  |  |  |  |  |  |  |  |  |  |  |  |  |  |  |  |  |  |  |  |  |  |  |  |  |  |  |  |  |  |  |  |  |  |  |  |  |  |  |  |  |  |  |  |  |  |  |  |  |  |  |  |  |  |  |  |  |  |  |  |  |  |  |  |  |  |  |  |  |  |  |  |  |  |  |  |  |  |  |  |  |  |  |  |  |  |  |  |  |  |  |  |  |  |  |  |  |  |  |  |  |  |  |  |  |  |  |  |  |  |  |  |  |  |  |  |  |  |  |  |  |  |  |  |  |  |  |  |  |  |  |  |  |  |  |  |  |  |  |  |  |  |  |  |  |  |  |  |  |  |  |  |  |  |  |  |  |  |  |  |  |  |  |  |  |  |  |  |  |  |  |  |  |  |  |  |  |  |  |  |  |  |  |  |  |  |  |  |  |  |  |  |  |  |  |  |  |  |  |  |  |  |  |  |  |  |  |  |  |  |  |  |  |  |  |  |  |  |  |  |  |  |  |  |  |  |  |  |  |  |  |  |  |  |  |  |  |  |  |  |  |  |  |  |  |  |  |  |  |  |  |  |  |  |  |  |  |  |  |  |  |  |  |  |  |  |  |  |  |  |  |  |  |  |  |  |  |  |  |  |  |  |  |  |  |  |  |  |  |  |  |  |  |  |  |  |  |  |  |  |  |  |  |  |  |  |  |  |  |  |  |  |  |  |  |  |  |  |  |  |  |  |  |  |  |  |  |  |  |  |  |  |  |  |  |  |  |  |  |  |  |  |  |  |  |  |  |  |  |  |  |  |  |  |  |  |  |  |  |  |  |  |  |  |  |  |  |  |  |  |  |  |  |  |  |  |  |  |  |  |  |  |  |  |  |  |  |  |  |  |  |  |  |  |  |  |  |  |  |  |  |  |  |  |  |  |  |  |  |  |  |  |  |  |  |  |  |  |  |  |  |  |  |  |  |  |  |  |  |  |  |  |  |  |  |  |  |  |  |  |  |  |  |  |  |  |  |  |  |  |  |  |  |  |  |  |  |  |  |  |  |  |  |  |  |  |  |  |  |  |  |  |  |  |  |  |  |  |  |  |  |  |  |  |  |  |  |  |  |  |  |  |  |  |  |  |  |  |  |  |  |  |  |  |  |  |  |  |  |  |  |  |  |  |  |  |  |  |  |  |  |  |  |  |  |  |  |  |  |  |  |  |  |  |  |  |  |  |  |  |  |  |  |  |  |  |  |  |  |  |  |  |  |  |  |  |  |  |  |  |  |  |  |  |  |  |  |  |  |  |  |  |  |  |  |  |  |  |  |  |  |  |  |  |  |  |  |  |  |  |  |  |  |  |  |  |  |  |  |  |  |  |  |  |  |  |  |  |  |  |  |  |  |  |  |  |  |  |  |  |  |  |  |  |  |  |  |  |  |  |  |  |  |  |  |  |  |  |  |  |  |  |  |  |  |  |  |  |  |  |  |  |  |  |  |  |  |  |  |  |  |  |  |  |  |  |  |  |  |  |  |  |  |  |  |  |  |  |  |  |  |  |  |  |  |  |  |  |  |  |  |  |  |  |  |  |  |  |  |  |  |  |  |  |  |  |  |  |  |  |  |  |  |  |  |  |  |  |  |  |  |  |  |  |  |  |  |  |  |  |  |  |  |  |  |  |  |  |  |  |  |  |  |  |  |  |  |  |  |  |  |  |  |  |  |  |  |  |  |  |  |  |  |  |  |  |  |  |  |  |  |  |  |  |  |  |  |  |  |  |  |  |  |  |  |  |  |  |  |  |  |  |  |  |  |  |  |  |  |  |  |  |  |  |  |  |  |  |  |  |  |  |  |  |  |  |  |  |  |  |  |  |  |  |  |  |  |  |  |  |  |  |  |  |  |  |  |  |  |  |  |  |  |  |  |  |  |  |  |  |  |  |  |  |  |  |  |  |  |  |  |  |  |  |  |  |  |  |  |  |  |  |  |  |  |  |  |  |  |  |  |  |  |  |  |  |  |  |  |  |  |  |  |  |  |  |  |  |  |  |  |  |  |  |  |  |  |  |  |  |  |  |  |  |  |  |  |  |  |  |  |  |  |  |  |  |  |  |  |  |  |  |  |  |  |  |  |  |  |  |  |  |  |  |  |  |  |  |  |  |  |  |  |  |  |  |  |  |  |  |  |  |  |  |  |  |  |  |  |  |  |  |  |  |  |  |  |  |  |  |  |  |  |  |  |  |  |  |  |  |  |  |  |  |  |  |  |  |  |  |  |  |  |  |  |  |  |  |  |  |  |  |  |  |  |  |  |  |  |  |  |  |  |  |  |  |  |  |  |  |  |  |  |  |  |  |  |  |  |  |  |  |  |  |  |  |  |  |  |  |  |  |  |  |  |  |  |  |  |  |  |  |  |  |  |  |  |  |  |  |  |  |  |  |  |  |  |  |  |  |  |  |  |  |  |  |  |  |  |  |  |  |  |  |  |  |  |  |  |  |  |  |  |  |  |  |  |  |  |  |  |  |  |  |  |  |  |  |  |  |  |  |  |  |  |  |  |  |  |  |  |  |  |  |  |  |  |  |  |  |  |  |  |  |  |  |  |  |  |  |  |  |  |  |  |  |  |  |  |  |  |  |  |  |  |  |  |  |  |  |  |  |  |  |  |  |  |  |  |  |  |  |  |  |  |  |  |  |  |  |  |  |  |  |  |  |  |  |  |  |  |  |  |  |  |  |  |  |  |  |  |  |  |  |  |  |  |  |  |  |  |  |  |  |  |  |
|        | ...(((.....)))..((.(.(((.....(((((((((((((((((.(...).)).)).)).))))))))))..)).).).((.....)).. |  |  |  |  |  |  |  |  |      |  |  |  |  |  |  |  |  |  |  |                       |  |  |  |  |  |  |  |  |  |  |  |  |  |  |  |  |  |  |  |               |  |  |  |  |  |  |  |  |  |  |  |  |  |  |  |  |  |  |  |          |  |  |  |  |  |  |  |  |  |  |  |  |  |  |  |  |  |  |  |                   |  |  |  |  |  |  |  |  |  |  |  |  |  |  |  |  |  |  |  |       |  |  |  |  |  |  |  |  |  |  |  |  |  |  |  |  |  |  |  |                  |  |  |  |  |  |  |  |  |  |  |  |  |  |  |  |  |  |  |  |       |  |  |  |  |  |  |  |  |  |  |  |  |  |  |  |  |  |  |  |     |     |  |  |  |  |  |  |  |  |  |  |  |  |  |  |  |  |  |  |  |  |  |  |  |  |  |  |  |  |  |  |  |  |  |  |  |  |  |  |  |  |  |  |  |  |  |  |  |  |  |  |  |  |  |  |  |  |  |  |  |  |  |  |  |  |  |  |  |  |  |  |  |  |  |  |  |  |  |  |  |  |  |  |  |  |  |  |  |  |  |  |  |  |  |  |  |  |  |  |  |  |  |  |  |  |  |  |  |  |  |  |  |  |  |  |  |  |  |  |  |  |  |  |  |  |  |  |  |  |  |  |  |  |  |  |  |  |  |  |  |  |  |  |  |  |  |  |  |  |  |  |  |  |  |  |  |  |  |  |  |  |  |  |  |  |  |  |  |  |  |  |  |  |  |  |  |  |  |  |  |  |  |  |  |  |  |  |  |  |  |  |  |  |  |  |  |  |  |  |  |  |  |  |  |  |  |  |  |  |  |  |  |  |  |  |  |  |  |  |  |  |  |  |  |  |  |  |  |  |  |  |  |  |  |  |  |  |  |  |  |  |  |  |  |  |  |  |  |  |  |  |  |  |  |  |  |  |  |  |  |  |  |  |  |  |  |  |  |  |  |  |  |  |  |  |  |  |  |  |  |  |  |  |  |  |  |  |  |  |  |  |  |  |  |  |  |  |  |  |  |  |  |  |  |  |  |  |  |  |  |  |  |  |  |  |  |  |  |  |  |  |  |  |  |  |  |  |  |  |  |  |  |  |  |  |  |  |  |  |  |  |  |  |  |  |  |  |  |  |  |  |  |  |  |  |  |  |  |  |  |  |  |  |  |  |  |  |  |  |  |  |  |  |  |  |  |  |  |  |  |  |  |  |  |  |  |  |  |  |  |  |  |  |  |  |  |  |  |  |  |  |  |  |  |  |  |  |  |  |  |  |  |  |  |  |  |  |  |  |  |  |  |  |  |  |  |  |  |  |  |  |  |  |  |  |  |  |  |  |  |  |  |  |  |  |  |  |  |  |  |  |  |  |  |  |  |  |  |  |  |  |  |  |  |  |  |  |  |  |  |  |  |  |  |  |  |  |  |  |  |  |  |  |  |  |  |  |  |  |  |  |  |  |  |  |  |  |  |  |  |  |  |  |  |  |  |  |  |  |  |  |  |  |  |  |  |  |  |  |  |  |  |  |  |  |  |  |  |  |  |  |  |  |  |  |  |  |  |  |  |  |  |  |  |  |  |  |  |  |  |  |  |  |  |  |  |  |  |  |  |  |  |  |  |  |  |  |  |  |  |  |  |  |  |  |  |  |  |  |  |  |  |  |  |  |  |  |  |  |  |  |  |  |  |  |  |  |  |  |  |  |  |  |  |  |  |  |  |  |  |  |  |  |  |  |  |  |  |  |  |  |  |  |  |  |  |  |  |  |  |  |  |  |  |  |  |  |  |  |  |  |  |  |  |  |  |  |  |  |  |  |  |  |  |  |  |  |  |  |  |  |  |  |  |  |  |  |  |  |  |  |  |  |  |  |  |  |  |  |  |  |  |  |  |  |  |  |  |  |  |  |  |  |  |  |  |  |  |  |  |  |  |  |  |  |  |  |  |  |  |  |  |  |  |  |  |  |  |  |  |  |  |  |  |  |  |  |  |  |  |  |  |  |  |  |  |  |  |  |  |  |  |  |  |  |  |  |  |  |  |  |  |  |  |  |  |  |  |  |  |  |  |  |  |  |  |  |  |  |  |  |  |  |  |  |  |  |  |  |  |  |  |  |  |  |  |  |  |  |  |  |  |  |  |  |  |  |  |  |  |  |  |  |  |  |  |  |  |  |  |  |  |  |  |  |  |  |  |  |  |  |  |  |  |  |  |  |  |  |  |  |  |  |  |  |  |  |  |  |  |  |  |  |  |  |  |  |  |  |  |  |  |  |  |  |  |  |  |  |  |  |  |  |  |  |  |  |  |  |  |  |  |  |  |  |  |  |  |  |  |  |  |  |  |  |  |  |  |  |  |  |  |  |  |  |  |  |  |  |  |  |  |  |  |  |  |  |  |  |  |  |  |  |  |  |  |  |  |  |  |  |  |  |  |  |  |  |  |  |  |  |  |  |  |  |  |  |  |  |  |  |  |  |  |  |  |  |  |  |  |  |  |  |  |  |  |  |  |  |  |  |  |  |  |  |  |  |  |  |  |  |  |  |  |  |  |  |  |  |  |  |  |  |  |  |  |  |  |  |  |  |  |  |  |  |  |  |  |  |  |  |  |  |  |  |  |  |  |  |  |  |  |  |  |  |  |  |  |  |  |  |  |  |  |  |  |  |  |  |  |  |  |  |  |  |  |  |  |  |  |  |  |  |  |  |  |  |  |  |  |  |  |  |  |  |  |  |  |  |  |  |  |  |  |  |  |  |  |  |  |  |  |  |  |  |  |  |  |  |  |  |  |  |  |  |  |  |  |  |  |  |  |  |  |  |  |  |  |  |  |  |  |  |  |  |  |  |  |  |  |  |  |  |  |  |  |  |  |  |  |  |  |  |  |  |  |  |  |  |  |  |  |  |  |  |  |  |  |  |  |  |  |  |  |  |  |  |  |  |  |  |  |  |  |  |  |  |  |  |  |  |  |  |  |  |  |  |  |  |  |  |  |  |  |  |  |  |  |  |  |  |  |  |  |  |  |  |  |  |  |  |  |  |  |  |  |  |  |  |  |  |  |  |  |  |  |  |  |  |  |  |  |  |  |  |  |  |  |  |  |  |  |  |  |  |  |  |  |  |  |  |  |  |  |  |  |  |  |  |  |  |  |  |  |  |  |  |  |  |  |  |  |  |  |  |  |  |  |  |  |  |  |  |  |  |  |  |  |  |  |  |  |  |  |  |  |  |  |  |  |  |  |  |  |  |  |  |  |  |  |  |  |  |  |  |  |  |  |  |  |  |  |  |  |  |  |  |  |  |  |  |  |  |  |  |  |  |  |  |  |  |  |  |  |  |  |  |  |  |  |  |  |  |  |  |  |  |  |  |  |  |  |  |  |  |  |  |  |  |  |  |  |  |  |  |  |  |  |  |  |  |  |  |  |  |  |  |  |  |  |  |  |  |  |  |  |  |  |  |  |  |  |  |  |  |  |  |  |  |  |  |  |  |  |  |  |  |  |  |  |  |  |  |  |  |  |  |  |  |  |  |  |  |  |  |  |  |  |  |  |  |  |  |  |  |  |  |  |  |  |  |  |  |  |  |  |  |  |  |  |  |  |  |  |  |  |  |  |  |  |  |  |  |  |  |  |  |  |  |  |  |  |  |  |  |  |  |  |  |  |  |  |  |  |  |  |  |  |  |  |  |  |  |  |  |  |  |  |  |  |  |  |  |  |  |  |  |  |  |  |  |  |  |  |  |  |  |  |  |  |  |  |  |  |  |  |  |  |  |  |  |  |  |  |  |  |  |  |  |  |  |  |  |  |  |  |  |  |  |  |  |  |  |  |  |  |  |  |  |  |  |  |  |  |  |  |  |  |  |  |  |  |  |  |  |  |  |  |  |  |  |  |  |  |  |  |  |  |  |  |  |  |  |  |  |  |  |  |  |  |  |  |  |  |  |  |  |  |  |  |  |  |  |  |  |  |  |  |  |  |  |  |  |  |  |  |  |  |  |  |  |  |  |  |  |  |  |  |  |  |  |  |  |  |  |  |  |  |  |  |  |  |  |  |  |  |  |  |  |  |  |  |  |  |  |  |  |  |  |  |  |  |  |  |  |  |  |  |  |  |  |  |  |  |  |  |  |  |  |  |  |  |  |  |  |  |  |  |  |  |  |  |  |  |  |  |  |  |  |  |  |  |  |  |  |  |  |  |  |  |  |  |  |  |  |  |  |  |  |  |  |  |  |  |  |  |  |  |  |  |  |  |  |  |  |  |  |  |  |  |  |  |  |  |  |  |  |  |  |  |  |  |  |  |  |  |  |  |  |  |  |  |  |  |  |  |  |  |  |  |  |  |  |  |  |  |  |  |  |  |  |  |  |  |  |  |  |  |  |  |  |  |  |  |  |  |  |  |  |  |  |  |  |  |  |  |  |  |  |  |  |  |  |  |  |  |  |  |  |  |  |  |  |  |  |  |  |  |  |  |  |  |  |  |  |  |  |  |  |  |  |  |  |  |  |  |  |  |  |  |  |  |  |  |  |  |  |  |  |  |  |  |  |  |  |  |  |  |  |  |  |  |  |  |  |  |  |  |  |  |  |  |  |  |  |  |  |  |  |  |  |  |  |  |  |  |  |  |  |  |  |  |  |  |  |  |  |  |  |  |  |  |  |  |  |  |  |  |  |  |  |  |  |  |  |  |  |  |  |  |  |  |  |  |  |  |  |  |  |  |  |  |  |  |  |  |  |  |  |  |  |  |  |  |  |  |  |  |  |  |  |  |  |  |  |  |  |  |  |  |  |  |  |  |  |  |  |  |  |  |  |  |  |  |  |  |  |  |  |  |  |  |  |  |  |  |  |  |  |  |  |  |  |  |  |  |  |  |  |  |  |  |  |  |  |  |  |  |  |  |  |  |  |  |  |  |  |  |  |  |  |  |  |  |  |  |  |  |  |  |  |  |  |  |  |  |  |  |  |  |  |  |  |  |  |  |  |  |  |  |  |  |  |  |  |  |  |  |  |  |  |  |  |  |  |  |  |  |  |  |  |  |  |  |  |  |  |  |  |  |  |  |  |  |  |  |  |  |  |  |  |  |  |  |  |  |  |  |  |  |  |  |  |  |  |  |  |  |  |  |  |  |  |  |  |  |  |  |  |  |  |  |  |  |  |  |  |  |  |  |  |  |  |  |  |  |  |  |  |  |  |  |  |  |  |  |  |  |  |  |  |  |  |  |  |  |  |  |  |  |  |  |  |  |  |  |  |  |  |  |  |  |  |  |  |  |  |  |  |  |  |  |  |  |  |  |  |  |  |  |  |  |  |  |  |  |  |  |  |  |  |  |  |  |  |  |  |  |  |  |  |  |  |  |  |  |  |  |  |  |  |  |  |  |  |  |  |  |  |  |  |  |  |  |  |  |  |  |  |  |  |  |  |  |  |  |  |  |  |  |  |  |  |  |  |  |  |  |  |  |  |  |  |  |  |  |  |  |  |  |  |  |  |  |  |  |  |  |  |  |  |  |  |  |  |  |  |  |  |  |  |  |  |  |  |  |  |  |  |  |  |  |  |  |  |  |  |  |  |  |  |  |  |  |  |  |  |  |  |  |  |  |  |  |  |  |  |  |  |  |  |  |  |  |  |  |  |  |  |  |  |  |  |  |  |  |  |  |  |  |  |  |  |  |  |  |  |  |  |  |  |  |  |  |  |  |  |  |  |  |  |  |  |  |  |  |  |  |  |  |  |  |  |  |  |  |  |  |  |  |  |  |  |  |  |  |  |  |  |  |  |  |  |  |  |  |  |  |  |  |  |  |  |  |  |  |  |  |  |  |  |  |  |  |  |  |  |  |  |  |  |  |  |  |  |  |  |  |  |  |  |  |  |  |  |  |  |  |  |  |  |  |  |  |  |  |  |  |  |  |  |  |  |  |  |  |  |  |  |  |  |  |  |  |  |  |  |  |  |  |  |  |  |  |  |  |  |  |  |  |  |  |  |  |  |  |  |  |  |  |  |  |  |  |  |  |  |  |  |  |  |  |  |  |  |  |  |  |  |  |  |  |  |  |  |  |  |  |  |  |  |  |  |  |  |  |  |  |  |  |  |  |  |  |  |  |  |  |  |  |  |  |  |  |  |  |  |  |  |  |  |  |  |  |  |  |  |  |  |  |  |  |  |  |  |  |  |  |  |  |  |  |  |  |  |  |  |  |  |  |  |  |  |  |  |  |  |  |  |  |  |  |  |  |  |  |  |  |  |  |  |  |  |  |  |  |  |  |  |  |  |  |  |  |  |  |  |  |  |  |  |  |  |  |  |  |  |  |  |  |  |  |  |  |  |  |  |  |  |  |  |  |  |  |  |  |  |  |  |  |  |  |  |  |  |  |  |  |  |  |  |  |  |  |  |  |  |  |  |  |  |  |  |  |  |  |  |  |  |  |  |  |  |  |  |  |  |  |  |  |  |  |  |  |  |  |  |  |  |  |  |  |  |  |  |  |  |  |  |  |  |  |  |  |  |  |  |  |  |  |  |  |  |  |  |  |  |  |  |  |  |  |  |  |  |  |  |  |  |  |  |  |  |  |  |  |  |  |  |  |  |  |  |  |  |  |  |  |  |  |  |  |  |  |  |  |  |  |  |  |  |  |  |  |  |  |  |  |  |  |  |  |  |  |  |  |  |  |  |  |  |  |  |  |  |  |  |  |  |  |  |  |  |  |  |  |  |  |  |  |  |  |  |  |  |  |  |  |  |  |  |  |  |  |  |  |  |  |  |  |  |  |  |  |  |  |  |  |  |  |  |  |  |  |  |  |  |  |  |  |  |  |  |  |  |  |  |  |  |  |  |  |  |  |  |  |  |  |  |  |  |  |  |  |  |  |  |  |  |  |  |  |  |  |  |  |  |  |  |  |  |  |  |  |  |  |  |  |  |  |  |  |  |  |  |  |  |  |  |  |  |  |  |  |  |  |  |  |  |  |  |  |  |  |  |  |  |  |  |  |  |  |  |  |  |  |  |  |  |  |  |  |  |  |  |  |  |  |  |  |  |  |  |  |  |  |  |  |  |  |  |  |  |  |  |  |  |  |  |  |  |  |  |  |  |  |  |  |  |  |  |  |  |  |  |  |  |  |  |  |  |  |  |  |  |  |  |  |  |  |  |  |  |  |  |  |  |  |  |  |  |  |  |  |  |  |  |  |  |  |  |  |  |  |  |  |  |  |  |  |  |  |  |  |  |  |  |  |  |  |  |  |  |  |  |  |  |  |  |  |  |  |  |  |  |  |  |  |  |  |  |  |  |  |  |  |  |  |  |  |  |  |  |  |  |  |  |  |  |  |  |  |  |  |  |  |  |  |  |  |  |  |  |  |  |  |  |  |  |  |  |  |  |  |  |  |  |  |  |  |  |  |  |  |  |  |  |  |  |  |  |  |  |  |  |  |  |  |  |  |  |  |  |  |  |  |  |  |  |  |  |  |  |  |  |  |  |  |  |  |  |  |  |  |  |  |  |  |  |  |  |  |  |  |  |  |  |  |  |  |  |  |  |  |  |  |  |  |  |  |  |  |  |  |  |  |  |  |  |  |  |  |  |  |  |  |  |  |  |  |  |  |  |  |  |  |  |  |  |  |  |  |  |  |  |  |  |  |  |  |  |  |  |  |  |  |  |  |  |  |  |  |  |  |  |  |  |  |  |  |  |  |  |  |  |  |  |  |  |  |  |  |  |  |  |  |  |  |  |  |  |  |  |  |  |  |  |  |  |  |  |  |  |  |  |  |  |  |  |  |  |  |  |  |  |  |  |  |  |  |  |  |  |  |  |  |  |  |  |  |  |  |  |  |  |  |  |  |  |  |  |  |  |  |  |  |  |  |  |  |  |  |  |  |  |  |  |  |  |  |  |  |  |  |  |  |  |  |  |  |  |  |  |  |  |  |  |  |  |  |  |  |  |  |  |  |  |  |  |  |  |  |  |  |  |  |  |  |  |  |  |  |  |  |  |  |  |  |  |  |  |  |  |  |  |  |  |  |  |  |  |  |  |  |  |  |  |  |  |  |  |  |  |  |  |  |  |  |  |  |  |  |  |  |  |  |  |  |  |  |  |  |  |  |  |  |  |  |  |  |  |  |  |  |  |  |  |  |  |  |  |  |  |  |  |  |  |  |  |  |  |  |  |  |  |  |  |  |  |  |  |  |  |  |  |  |  |  |  |  |  |  |  |  |  |  |  |  |  |  |  |  |  |  |  |  |  |  |  |  |  |  |  |  |  |  |  |  |  |  |  |  |  |  |  |  |  |  |  |  |  |  |  |  |  |  |  |  |  |  |  |  |  |  |  |  |  |  |  |  |  |  |  |  |  |  |  |  |  |  |  |  |  |  |  |  |  |  |  |  |  |  |  |  |  |  |  |  |  |  |  |  |  |  |  |  |  |  |  |  |  |  |  |  |  |  |  |  |  |  |  |  |  |  |  |  |  |  |  |  |  |  |  |  |  |  |  |  |  |  |  |  |  |  |  |  |  |  |  |  |  |  |  |  |  |  |  |  |  |  |  |  |  |  |  |  |  |  |  |  |  |  |  |  |  |  |  |  |  |  |  |  |  |  |  |  |  |  |  |  |  |  |  |  |  |  |  |  |  |  |  |  |  |  |  |  |  |  |  |  |  |  |  |  |  |  |  |  |  |  |  |  |  |  |  |  |  |  |  |  |  |  |  |  |  |  |  |  |  |  |  |  |  |  |  |  |  |  |  |  |  |  |  |  |  |  |  |  |  |  |  |  |  |  |  |  |  |  |  |  |  |  |  |  |  |  |  |  |  |  |  |  |  |  |  |  |  |  |  |  |  |  |  |  |  |  |  |  |  |  |  |  |  |  |  |  |  |  |  |  |  |  |  |  |  |  |  |  |  |  |  |  |  |  |  |  |  |  |  |  |  |  |  |  |  |  |  |  |  |  |  |  |  |  |  |  |  |  |  |  |  |  |  |  |  |  |  |  |  |  |  |  |  |  |  |  |  |  |  |  |  |  |  |  |  |  |  |  |  |  |  |  |  |  |  |  |  |  |  |  |  |  |  |  |  |  |  |  |  |  |  |  |  |  |  |  |  |  |  |  |  |  |  |  |  |  |  |  |  |  |  |  |  |  |  |  |  |  |  |  |  |  |  |  |  |  |  |  |  |  |  |  |  |  |  |  |  |  |  |  |  |  |  |  |  |  |  |  |  |  |  |  |  |  |  |  |  |  |  |  |  |  |  |  |  |  |  |  |  |  |  |  |  |  |  |  |  |  |  |  |  |  |  |  |  |  |  |  |  |  |  |  |  |  |  |  |  |  |  |  |  |  |  |  |  |  |  |  |  |  |  |  |  |  |  |  |  |  |  |  |  |  |  |  |  |  |  |  |  |  |  |  |  |  |  |  |  |  |  |  |  |  |  |  |  |  |  |  |  |  |  |  |  |  |  |  |  |  |  |  |  |  |  |  |  |  |  |  |  |  |  |  |  |  |  |  |  |  |  |  |  |  |  |  |  |  |  |  |  |  |  |  |  |  |  |  |  |  |  |  |  |  |  |  |  |  |  |  |  |  |  |  |  |  |  |  |  |  |  |  |  |  |  |  |  |  |  |  |  |  |  |  |  |  |  |  |  |  |  |  |  |  |  |  |  |  |  |  |  |  |  |  |  |  |  |  |  |  |  |  |  |  |  |  |  |  |  |  |  |  |  |  |  |  |  |  |  |  |  |  |  |  |  |  |  |  |  |  |  |  |  |  |  |  |  |  |  |  |  |  |  |  |  |  |  |  |  |  |  |  |  |  |  |  |  |  |  |  |  |  |  |  |  |  |  |  |  |  |  |  |  |  |  |  |  |  |  |  |  |  |  |  |  |  |  |  |  |  |  |  |  |  |  |  |  |  |  |  |  |  |  |  |  |  |  |  |  |  |  |  |  |  |  |  |  |  |  |  |  |  |  |  |  |  |  |  |  |  |  |  |  |  |  |  |  |  |  |  |  |  |  |  |  |  |  |  |  |  |  |  |  |  |  |  |  |  |  |  |  |  |  |  |  |  |  |  |  |  |  |  |  |  |  |  |  |  |  |  |  |  |  |  |  |  |  |  |  |  |  |  |  |  |  |  |  |  |  |  |  |  |  |  |  |  |  |  |  |  |  |  |  |  |  |  |  |  |  |  |  |  |  |  |  |  |  |  |  |  |  |  |  |  |  |  |  |  |  |  |  |  |  |  |  |  |  |  |  |  |  |  |  |  |  |  |  |  |  |  |  |  |  |  |  |  |  |  |  |  |  |  |  |  |  |  |  |  |  |  |  |  |  |  |  |  |  |  |  |  |  |  |  |  |  |  |  |  |  |  |  |  |  |  |  |  |  |  |  |  |  |  |  |  |  |  |  |  |  |  |  |  |  |  |  |  |  |  |  |  |  |  |  |  |  |  |  |  |  |  |  |  |  |  |  |  |  |  |  |  |  |  |  |  |  |  |  |  |  |  |  |  |  |  |  |  |  |  |  |  |  |  |  |  |  |  |  |  |  |  |  |  |  |  |  |  |  |  |  |  |  |  |  |  |  |  |  |  |  |  |  |  |  |  |  |  |  |  |  |  |  |  |  |  |  |  |  |  |  |  |  |  |  |  |  |  |  |  |  |  |  |  |  |  |  |  |  |  |  |  |  |  |  |  |  |  |  |  |  |  |  |  |  |  |  |  |  |  |  |  |  |  |  |  |  |  |  |  |  |  |  |  |  |  |  |  |  |  |  |  |  |  |  |  |  |  |  |  |  |  |  |  |  |  |  |  |  |  |  |  |  |  |  |  |  |  |  |  |  |  |  |  |  |  |  |  |  |  |  |  |  |  |  |  |  |  |  |  |  |  |  |  |  |  |  |  |  |  |  |  |  |  |  |  |  |  |  |  |  |  |  |  |  |  |  |  |  |  |  |  |  |  |  |  |  |  |  |  |  |  |  |  |  |  |  |  |  |  |  |  |  |  |  |  |  |  |  |  |  |  |  |  |  |  |  |  |  |  |  |  |  |  |  |  |  |  |  |  |  |  |  |  |  |  |  |  |  |  |  |  |  |  |  |  |  |  |  |  |  |  |  |  |  |  |  |  |  |  |  |  |  |  |  |  |  |  |  |  |  |  |  |  |  |  |  |  |  |  |  |  |  |  |  |  |  |  |  |  |  |  |  |  |  |  |  |  |  |  |  |  |  |  |  |  |  |  |  |  |  |  |  |  |  |  |  |  |  |  |  |  |  |  |  |  |  |  |  |  |  |  |  |  |  |  |  |  |  |  |  |  |  |  |  |  |  |  |  |  |  |  |  |  |  |  |  |  |  |  |  |  |  |  |  |  |  |  |  |  |  |  |  |  |  |  |  |  |  |  |  |  |  |  |  |  |  |  |  |  |  |  |  |  |  |  |  |  |  |  |  |  |  |  |  |  |  |  |  |  |  |  |  |  |  |  |  |  |  |  |  |  |  |  |  |  |  |  |  |  |  |  |  |  |  |  |  |  |  |  |  |  |  |  |  |  |  |  |  |  |  |  |  |  |  |  |  |  |  |  |  |  |  |  |  |  |  |  |  |  |  |  |  |  |  |  |  |  |  |  |  |  |  |  |  |  |  |  |  |  |  |  |  |  |  |  |  |  |  |  |  |  |  |  |  |  |  |  |  |  |  |  |  |  |  |  |  |  |  |  |  |  |  |  |  |  |  |  |  |  |  |  |  |  |  |  |  |  |  |  |  |  |  |  |  |  |  |  |  |  |  |  |  |  |  |  |  |  |  |  |  |  |  |  |  |  |  |  |  |  |  |  |  |  |  |  |  |  |  |  |  |  |  |  |  |  |  |  |  |  |  |  |  |  |  |  |  |  |  |  |  |  |  |  |  |  |  |  |  |  |  |  |  |  |  |  |  |  |  |  |  |  |  |  |  |  |  |  |  |  |  |  |  |  |  |  |  |  |  |  |  |  |  |  |  |  |  |  |  |  |  |  |  |  |  |  |  |  |  |  |  |  |  |  |  |  |  |  |  |  |  |  |  |  |  |  |  |  |  |  |  |  |  |  |  |  |  |  |  |  |  |  |  |  |  |  |  |  |  |  |  |  |  |  |  |  |  |  |  |  |  |  |  |  |  |  |  |  |  |  |  |  |  |  |  |  |  |  |  |  |  |  |  |  |  |  |  |  |  |  |  |  |  |  |  |  |  |  |  |  |  |  |  |  |  |  |  |  |  |  |  |  |  |  |  |  |  |  |  |  |  |  |  |  |  |  |  |  |  |  |  |  |  |  |  |  |  |  |  |  |  |  |  |  |  |  |  |  |  |  |  |  |  |  |  |  |  |  |  |  |  |  |  |  |  |  |  |  |  |  |  |  |  |  |  |  |  |  |  |  |  |  |  |  |  |  |  |  |  |  |  |  |  |  |  |  |  |  |  |  |  |  |  |  |  |  |  |  |  |  |  |  |  |  |  |  |  |  |  |  |  |  |  |  |  |  |  |  |  |  |  |  |  |  |  |  |  |  |  |  |  |  |  |  |  |  |  |  |  |  |  |  |  |  |  |  |  |  |  |  |  |  |  |  |  |  |  |  |  |  |  |  |  |  |  |  |  |  |  |  |  |  |  |  |  |  |  |  |  |  |  |  |  |  |  |  |  |  |  |  |  |  |  |  |  |  |  |  |  |  |  |  |  |  |  |  |  |  |  |  |  |  |  |  |  |  |  |  |  |  |  |  |  |  |  |  |  |  |  |  |  |  |  |  |  |  |  |  |  |  |  |  |  |  |  |  |  |  |  |  |  |  |  |  |  |  |  |  |  |  |  |  |  |  |  |  |  |  |  |  |  |  |  |  |  |  |  |  |  |  |  |  |  |  |  |  |  |  |  |  |  |  |  |  |  |  |  |  |  |  |  |  |  |  |  |  |  |  |  |  |  |  |  |  |  |  |  |  |  |  |  |  |  |  |  |  |  |  |  |  |  |  |  |  |  |  |  |  |  |  |  |  |  |  |  |  |  |  |  |  |  |  |  |  |  |  |  |  |  |  |  |  |  |  |  |  |  |  |  |  |  |  |  |  |  |  |  |  |  |  |  |  |  |  |  |  |  |  |  |  |  |  |  |  |  |  |  |  |  |  |  |  |  |  |  |  |  |  |  |  |  |  |  |  |  |  |  |  |  |  |  |  |  |  |  |  |  |  |  |  |  |  |  |  |  |  |  |  |  |  |  |  |  |  |  |  |  |  |  |  |  |  |  |  |  |  |  |  |  |  |  |  |  |  |  |  |  |  |  |  |  |  |  |  |  |  |  |  |  |  |  |  |  |  |  |  |  |  |  |  |  |  |  |  |  |  |  |  |  |  |  |  |  |  |  |  |  |  |  |  |  |  |  |  |  |  |  |  |  |  |  |  |  |  |  |  |  |  |  |  |  |  |  |  |  |  |  |  |  |  |  |  |  |  |  |  |  |  |  |  |  |  |  |  |  |  |  |  |  |  |  |  |  |  |  |  |  |  |  |  |  |  |  |  |  |  |  |  |  |  |  |  |  |  |  |  |  |  |  |  |  |  |  |  |  |  |  |  |  |  |  |  |  |  |  |  |  |  |  |  |  |  |  |  |  |  |  |  |  |  |  |  |  |  |  |  |  |  |  |  |  |  |  |  |  |  |  |  |  |  |  |  |  |  |  |  |  |  |  |  |  |  |  |  |  |  |  |  |  |  |  |  |  |  |  |  |  |  |  |  |  |  |  |  |  |  |  |  |  |  |  |  |  |  |  |  |  |  |  |  |  |  |  |  |  |  |  |  |  |  |  |  |  |  |  |  |  |  |  |  |  |  |  |  |  |  |  |  |  |  |  |  |  |  |  |  |  |  |  |  |  |  |  |  |  |  |  |  |  |  |  |  |  |  |  |  |  |  |  |  |  |  |  |  |  |  |  |  |  |  |  |  |  |  |  |  |  |  |  |  |  |  |  |  |  |  |  |  |  |  |  |  |  |  |  |  |  |  |  |  |  |  |  |  |  |  |  |  |  |  |  |  |  |  |  |  |  |  |  |  |  |  |  |  |  |  |  |  |  |  |  |  |  |  |  |  |  |  |  |  |  |  |  |  |  |  |  |  |  |  |  |  |  |  |  |  |  |  |  |  |  |  |  |  |  |  |  |  |  |  |  |  |  |  |  |  |  |  |  |  |  |  |  |  |  |  |  |  |  |  |  |  |  |  |  |  |  |  |  |  |  |  |  |  |  |  |  |  |  |  |  |  |  |  |  |  |  |  |  |  |  |  |  |  |  |  |  |  |  |  |  |  |  |  |  |  |  |  |  |  |  |  |  |  |  |  |  |  |  |  |  |  |  |  |  |  |  |  |  |  |  |  |  |  |  |  |  |  |  |  |  |  |  |  |  |  |  |  |  |  |  |  |  |  |  |  |  |  |  |  |  |  |  |  |  |  |  |  |  |  |  |  |  |  |  |  |  |  |  |  |  |  |  |  |  |  |  |  |  |  |  |  |  |  |  |  |  |  |  |  |  |  |  |  |  |  |  |  |  |  |  |  |  |  |  |  |  |  |  |  |  |  |  |  |  |  |  |  |  |  |  |  |  |  |  |  |  |  |  |  |  |  |  |  |  |  |  |  |  |  |  |  |  |  |  |  |  |  |  |  |  |  |  |  |  |  |  |  |  |  |  |  |  |  |  |  |  |  |  |  |  |  |  |  |  |  |  |  |  |  |  |  |  |  |  |  |  |  |  |  |  |  |  |  |  |  |  |  |  |  |  |  |  |  |  |  |  |  |  |  |  |  |  |  |  |  |  |  |  |  |  |  |  |  |  |  |  |  |  |  |  |  |  |  |  |  |  |  |  |  |  |  |  |  |  |  |  |  |  |  |  |  |  |  |  |  |  |  |  |  |  |  |  |  |  |  |  |  |  |  |  |  |  |  |  |  |  |  |  |  |  |  |  |  |  |  |  |  |  |  |  |  |  |  |  |  |  |  |  |  |  |  |  |  |  |  |  |  |  |  |  |  |  |  |  |  |  |  |  |  |  |  |  |  |  |  |  |  |  |  |  |  |  |  |  |  |  |  |  |  |  |  |  |  |  |  |  |  |  |  |  |  |  |  |  |  |  |  |  |  |  |  |  |  |  |  |  |  |  |  |  |  |  |  |  |  |  |  |  |  |  |  |  |  |  |  |  |  |  |  |  |  |  |  |  |  |  |  |  |  |  |  |  |  |  |  |  |  |  |  |  |  |  |  |  |  |  |  |  |  |  |  |  |  |  |  |  |  |  |  |  |  |  |  |  |  |  |  |  |  |  |  |  |  |  |  |  |  |  |  |  |  |  |  |  |  |  |  |  |  |  |  |  |  |  |  |  |  |  |  |  |  |  |  |  |  |  |  |  |  |  |  |  |  |  |  |  |  |  |  |  |  |  |  |  |  |  |  |  |  |  |  |  |  |  |  |  |  |  |  |  |  |  |  |  |  |  |  |  |  |  |  |  |  |  |  |  |  |  |  |  |  |  |  |  |  |  |  |  |  |  |  |  |  |  |  |  |  |  |  |  |  |  |  |  |  |  |  |  |  |  |  |  |  |  |  |  |  |  |  |  |  |  |  |  |  |  |  |  |  |  |  |  |  |  |  |  |  |  |  |  |  |  |  |  |  |  |  |  |  |  |  |  |  |  |  |  |  |  |  |  |  |  |  |  |  |  |  |  |  |  |  |  |  |  |  |  |  |  |  |  |  |  |  |  |  |  |  |  |  |  |  |  |  |  |  |  |  |  |  |  |  |  |  |  |  |  |  |  |  |  |  |  |  |  |  |  |  |  |  |  |  |  |  |  |  |  |  |  |  |  |  |  |  |  |  |  |  |  |  |  |  |  |  |  |  |  |  |  |  |  |  |  |  |  |  |  |  |  |  |  |  |  |  |  |  |  |  |  |  |  |  |  |  |  |  |  |  |  |  |  |  |  |  |  |  |  |  |  |  |  |  |  |  |  |  |  |  |  |  |  |  |  |  |  |  |  |  |  |  |  |  |  |  |  |  |  |  |  |  |  |  |  |  |  |  |  |  |  |  |  |  |  |  |  |  |  |  |  |  |  |  |  |  |  |  |  |  |  |  |  |  |  |  |  |  |  |  |  |  |  |  |  |  |  |  |  |  |  |  |  |  |  |  |  |  |  |  |  |  |  |  |  |  |  |  |  |  |  |  |  |  |  |  |  |  |  |  |  |  |  |  |  |  |  |  |  |  |  |  |  |  |  |  |  |  |  |  |  |  |  |  |  |  |  |  |  |  |  |  |  |  |  |  |  |  |  |  |  |  |  |  |  |  |  |  |  |  |  |  |  |  |  |  |  |  |  |  |  |  |  |  |  |  |  |  |  |  |  |  |  |  |  |  |  |  |  |  |  |  |  |  |  |  |  |  |  |  |  |  |  |  |  |  |  |  |  |  |  |  |  |  |  |  |  |  |  |  |  |  |  |  |  |  |  |  |  |  |  |  |  |  |  |  |  |  |  |  |  |  |  |  |  |  |  |  |  |  |  |  |  |  |  |  |  |  |  |  |  |  |  |  |  |  |  |  |  |  |  |  |  |  |  |  |  |  |  |  |  |  |  |  |  |  |  |  |  |  |  |  |  |  |  |  |  |  |  |  |  |  |  |  |  |  |  |  |  |  |  |  |  |  |  |  |  |  |  |  |  |  |  |  |  |  |  |  |  |  |  |  |  |  |  |  |  |  |  |  |  |  |  |  |  |  |  |  |  |  |  |  |  |  |  |  |  |  |  |  |  |  |  |  |  |  |  |  |  |  |  |  |  |  |  |  |  |  |  |  |  |  |  |  |  |  |  |  |  |  |  |  |  |  |  |  |  |  |  |  |  |  |  |  |  |  |  |  |  |  |  |  |  |  |  |  |  |  |  |  |  |  |  |  |  |  |  |  |  |  |  |  |  |  |  |  |  |  |  |  |  |  |  |  |  |  |  |  |  |  |  |  |  |  |  |  |  |  |  |  |  |  |  |  |  |  |  |  |  |  |  |  |  |  |  |  |  |  |  |  |  |  |  |  |  |  |  |  |  |  |  |  |  |  |  |  |  |  |  |  |  |  |  |  |  |  |  |  |  |  |  |  |  |  |  |  |  |  |  |  |  |  |  |  |  |  |  |  |  |  |  |  |  |  |  |  |  |  |  |  |  |  |  |  |  |  |  |  |  |  |  |  |  |  |  |  |  |  |  |  |  |  |  |  |  |  |  |  |  |  |  |  |  |  |  |  |  |  |  |  |  |  |  |  |  |  |  |  |  |  |  |  |  |  |  |  |  |  |  |  |  |  |  |  |  |  |  |  |  |  |  |  |  |  |  |  |  |  |  |  |  |  |  |  |  |  |  |  |  |  |  |  |  |  |  |  |  |  |  |  |  |  |  |  |  |  |  |  |  |  |  |  |  |  |  |  |  |  |  |  |  |  |  |  |  |  |  |  |  |  |  |  |  |  |  |  |  |  |  |  |  |  |  |  |  |  |  |  |  |  |  |  |  |  |  |  |  |  |  |  |  |  |  |  |  |  |  |  |  |  |  |  |  |  |  |  |  |  |  |  |  |  |  |  |  |  |  |  |  |  |  |  |  |  |  |  |  |  |  |  |  |  |  |  |  |  |  |  |  |  |  |  |  |  |  |  |  |  |  |  |  |  |  |  |  |  |  |  |  |  |  |  |  |  |  |  |  |  |  |  |  |  |  |  |  |  |  |  |  |  |  |  |  |  |  |  |  |  |  |  |  |  |  |  |  |  |  |  |  |  |  |  |  |  |  |  |  |  |  |  |  |  |  |  |  |  |  |  |  |  |  |  |  |  |  |  |  |  |  |  |  |  |  |  |  |  |  |  |  |  |  |  |  |  |  |  |  |  |  |  |  |  |  |  |  |  |  |  |  |  |  |  |  |  |  |  |  |  |  |  |  |  |  |  |  |  |  |  |  |  |  |  |  |  |  |  |  |  |  |  |  |  |  |  |  |  |  |  |  |  |  |  |  |  |  |  |  |  |  |  |  |  |  |  |  |  |  |  |  |  |  |  |  |  |  |  |  |  |  |  |  |  |  |  |  |  |  |  |  |  |  |  |  |  |  |  |  |  |  |  |  |  |  |  |  |  |  |  |  |  |  |  |  |  |  |  |  |  |  |  |  |  |  |  |  |  |  |  |  |  |  |  |  |  |  |  |  |  |  |  |  |  |  |  |  |  |  |  |  |  |  |  |  |  |  |  |  |  |  |  |  |  |  |  |  |  |  |  |  |  |  |  |  |  |  |  |  |  |  |  |  |  |  |  |  |  |  |  |  |  |  |  |  |  |  |  |  |  |  |  |  |  |  |  |  |  |  |  |  |  |  |  |  |  |  |  |  |  |  |  |  |  |  |  |  |  |  |  |  |  |  |  |  |  |  |  |  |  |  |  |  |  |  |  |  |  |  |  |  |  |  |  |  |  |  |  |  |  |  |  |  |  |  |  |  |  |  |  |  |  |  |  |  |  |  |  |  |  |  |  |  |  |  |  |  |  |  |  |  |  |  |  |  |  |  |  |  |  |  |  |  |  |  |  |  |  |  |  |  |  |  |  |  |  |  |  |  |  |  |  |  |  |  |  |  |  |  |  |  |  |  |  |  |  |  |  |  |  |  |  |  |  |  |  |  |  |  |  |  |  |  |  |  |  |  |  |  |  |  |  |  |  |  |  |  |  |  |  |  |  |  |  |  |  |  |  |  |  |  |  |  |  |  |  |  |  |  |  |  |  |  |  |  |  |  |  |  |  |  |  |  |  |  |  |  |  |  |  |  |  |  |  |  |  |  |  |  |  |  |  |  |  |  |  |  |  |  |  |  |  |  |  |  |  |  |  |  |  |  |  |  |  |  |  |  |  |  |  |  |  |  |  |  |  |  |  |  |  |  |  |  |  |  |  |  |  |  |  |  |  |  |  |  |  |  |  |  |  |  |  |  |  |  |  |  |  |  |  |  |  |  |  |  |  |  |  |  |  |  |  |  |  |  |  |  |  |  |  |  |  |  |  |  |  |  |  |  |  |  |  |  |  |  |  |  |  |  |  |  |  |  |  |  |  |  |  |  |  |  |  |  |  |  |  |  |  |  |  |  |  |  |  |  |  |  |  |  |  |  |  |  |  |  |  |  |  |  |  |  |  |  |  |  |  |  |  |  |  |  |  |  |  |  |  |  |  |  |  |  |  |  |  |  |  |  |  |  |  |  |  |  |  |  |  |  |  |  |  |  |  |  |  |  |  |  |  |  |  |  |  |  |  |  |  |  |  |  |  |  |  |  |  |  |  |  |  |  |  |  |  |  |  |  |  |  |  |  |  |  |  |  |  |  |  |  |  |  |  |  |  |  |  |  |  |  |  |  |  |  |  |  |  |  |  |  |  |  |  |  |  |  |  |  |  |  |  |  |  |  |  |  |  |  |  |  |  |  |  |  |  |  |  |  |  |  |  |  |  |  |  |  |  |  |  |  |  |  |  |  |  |  |  |  |  |  |  |  |  |  |  |  |  |  |  |  |  |  |  |  |  |  |  |  |  |  |  |  |  |  |  |  |  |  |  |  |  |  |  |  |  |  |  |  |  |  |  |  |  |  |  |  |  |  |  |  |  |  |  |  |  |  |  |  |  |  |  |  |  |  |  |  |  |  |  |  |  |  |  |  |  |  |  |  |  |  |  |  |  |  |  |  |  |  |  |  |  |  |  |  |  |  |  |  |  |  |  |  |  |  |  |  |  |  |  |  |  |  |  |  |  |  |  |  |  |  |  |  |  |  |  |  |  |  |  |  |  |  |  |  |  |  |  |  |  |  |  |  |  |  |  |  |  |  |  |  |  |  |  |  |  |  |  |  |  |  |  |  |  |  |  |  |  |  |  |  |  |  |  |  |  |  |  |  |  |  |  |  |  |  |  |  |  |  |  |  |  |  |  |  |  |  |  |  |  |  |  |  |  |  |  |  |  |  |  |  |  |  |  |  |  |  |  |  |  |  |  |  |  |  |  |  |  |  |  |  |  |  |  |  |  |  |  |  |  |  |  |  |  |  |  |  |  |  |  |  |  |  |  |  |  |  |  |  |  |  |  |  |  |  |  |  |  |  |  |  |  |  |  |  |  |  |  |  |  |  |  |  |  |  |  |  |  |  |  |  |  |  |  |  |  |  |  |  |  |  |  |  |  |  |  |  |  |  |  |  |  |  |  |  |  |  |  |  |  |  |  |  |  |  |  |  |  |  |  |  |  |  |  |  |  |  |  |  |  |  |  |  |  |  |  |  |  |  |  |  |  |  |  |  |  |  |  |  |  |  |  |  |  |  |  |  |  |  |  |  |  |  |  |  |  |  |  |  |  |  |  |  |  |  |  |  |  |  |  |  |  |  |  |  |  |  |  |  |  |  |  |  |  |  |  |  |  |  |  |  |  |  |  |  |  |  |  |  |  |  |  |  |  |  |  |  |  |  |  |  |  |  |  |  |  |  |  |  |  |  |  |  |  |  |  |  |  |  |  |  |  |  |  |  |  |  |  |  |  |  |  |  |  |  |  |  |  |  |  |  |  |  |  |  |  |  |  |  |  |  |  |  |  |  |  |  |  |  |  |  |  |  |  |  |  |  |  |  |  |  |  |  |  |  |  |  |  |  |  |  |  |  |  |  |  |  |  |  |  |  |  |  |  |  |  |  |  |  |  |  |  |  |  |  |  |  |  |  |  |  |  |  |  |  |  |  |  |  |  |  |  |  |  |  |  |  |  |  |  |  |  |  |  |  |  |  |  |  |  |  |  |  |  |  |  |  |  |  |  |  |  |  |  |  |  |  |  |  |  |  |  |  |  |  |  |  |  |  |  |  |  |  |  |  |  |  |  |  |  |  |  |  |  |  |  |  |  |  |  |  |  |  |  |  |  |  |  |  |  |  |  |  |  |  |  |  |  |  |  |  |  |  |  |  |  |  |  |  |  |  |  |  |  |  |  |  |  |  |  |  |  |  |  |  |  |  |  |  |  |  |  |  |  |  |  |  |  |  |  |  |  |  |  |  |  |  |  |  |  |  |  |  |  |  |  |  |  |  |  |  |  |  |  |  |  |  |  |  |  |  |  |  |  |  |  |  |  |  |  |  |  |  |  |  |  |  |  |  |  |  |  |  |  |  |  |  |  |  |  |  |  |  |  |  |  |  |  |  |  |  |  |  |  |  |  |  |  |  |  |  |  |  |  |  |  |  |  |  |  |  |  |  |  |  |  |  |  |  |  |  |  |  |  |  |  |  |  |  |  |  |  |  |  |  |  |  |  |  |  |  |  |  |  |  |  |  |  |  |  |  |  |  |  |  |  |  |  |  |  |  |  |  |  |  |  |  |  |  |  |  |  |  |  |  |  |  |  |  |  |  |  |  |  |  |  |  |  |  |  |  |  |  |  |  |  |  |  |  |  |  |  |  |  |  |  |  |  |  |  |  |  |  |  |  |  |  |  |  |  |  |  |  |  |  |  |  |  |  |  |  |  |  |  |  |  |  |  |  |  |  |  |  |  |  |  |  |  |  |  |  |  |  |  |  |  |  |  |  |  |  |  |  |  |  |  |  |  |  |  |  |  |  |  |  |  |  |  |  |  |  |  |  |  |  |  |  |  |  |  |  |  |  |  |  |  |  |  |  |  |  |  |  |  |  |  |  |  |  |  |  |  |  |  |  |  |  |  |  |  |  |  |  |  |  |  |  |  |  |  |  |  |  |  |  |  |  |  |  |  |  |  |  |  |  |  |  |  |  |  |  |  |  |  |  |  |  |  |  |  |  |  |  |  |  |  |  |  |  |  |  |  |  |  |  |  |  |  |  |  |  |  |  |  |  |  |  |  |  |  |  |  |  |  |  |  |  |  |  |  |  |  |  |  |  |  |  |  |  |  |  |  |  |  |  |  |  |  |  |  |  |  |  |  |  |  |  |  |  |  |  |  |  |  |  |  |  |  |  |  |  |  |  |  |  |  |  |  |  |  |  |  |  |  |  |  |  |  |  |  |  |  |  |  |  |  |  |  |  |  |  |  |  |  |  |  |  |  |  |  |  |  |  |  |  |  |  |  |  |  |  |  |  |  |  |  |  |  |  |  |  |  |  |  |  |  |  |  |  |  |  |  |  |  |  |  |  |  |  |  |  |  |  |  |  |  |  |  |  |  |  |  |  |  |  |  |  |  |  |  |  |  |  |  |  |  |  |  |  |  |  |  |  |  |  |  |  |  |  |  |  |  |  |  |  |  |  |  |  |  |  |  |  |  |  |  |  |  |  |  |  |  |  |  |  |  |  |  |  |  |  |  |  |  |  |  |  |  |  |  |  |  |  |  |  |  |  |  |  |  |  |  |  |  |  |  |  |  |  |  |  |  |  |  |  |  |  |  |  |  |  |  |  |  |  |  |  |  |  |  |  |  |  |  |  |  |  |  |  |  |  |  |  |  |  |  |  |  |  |  |  |  |  |  |  |  |  |  |  |  |  |  |  |  |  |  |  |  |  |  |  |  |  |  |  |  |  |  |  |  |  |  |  |  |  |  |  |  |  |  |  |  |  |  |  |  |  |  |  |  |  |  |  |  |  |  |  |  |  |  |  |  |  |  |  |  |  |  |  |  |  |  |  |  |  |  |  |  |  |  |  |  |  |  |  |  |  |  |  |  |  |  |  |  |  |  |  |  |  |  |  |  |  |  |  |  |  |  |  |  |  |  |  |  |  |  |  |  |  |  |  |  |  |  |  |  |  |  |  |  |  |  |  |  |  |  |  |  |  |  |  |  |  |  |  |  |  |  |  |  |  |  |  |  |  |  |  |  |  |  |  |  |  |  |  |  |  |  |  |  |  |  |  |  |  |  |  |  |  |  |  |  |  |  |  |  |  |  |  |  |  |  |  |  |  |  |  |  |  |  |  |  |  |  |  |  |  |  |  |  |  |  |  |  |  |  |  |  |  |  |  |  |  |  |  |  |  |  |  |  |  |  |  |  |  |  |  |  |  |  |  |  |  |  |  |  |  |  |  |  |  |  |  |  |  |  |  |  |  |  |  |  |  |  |  |  |  |  |  |  |  |  |  |  |  |  |  |  |  |  |  |  |  |  |  |  |  |  |  |  |  |  |  |  |  |  |  |  |  |  |  |  |  |  |  |  |  |  |  |  |  |  |  |  |  |  |  |  |  |  |  |  |  |  |  |  |  |  |  |  |  |  |  |  |  |  |  |  |  |  |  |  |  |  |  |  |  |  |  |  |  |  |  |  |  |  |  |  |  |  |  |  |  |  |  |  |  |  |  |  |  |  |  |  |  |  |  |  |  |  |  |  |  |  |  |  |  |  |  |  |  |  |  |  |  |  |  |  |  |  |  |  |  |  |  |  |  |  |  |  |  |  |  |  |  |  |  |  |  |  |  |  |  |  |  |  |  |  |  |  |  |  |  |  |  |  |  |  |  |  |  |  |  |  |  |  |  |  |  |  |  |  |  |  |  |  |  |  |  |  |  |  |  |  |  |  |  |  |  |  |  |  |  |  |  |  |  |  |  |  |  |  |  |  |  |  |  |  |  |  |  |  |  |  |  |  |  |  |  |  |  |  |  |  |  |  |  |  |  |  |  |  |  |  |  |  |  |  |  |  |  |  |  |  |  |  |  |  |  |  |  |  |  |  |  |  |  |  |  |  |  |  |  |  |  |  |  |  |  |  |  |  |  |  |  |  |  |  |  |  |  |  |  |  |  |  |  |  |  |  |  |  |  |  |  |  |  |  |  |  |  |  |  |  |  |  |  |  |  |  |  |  |  |  |  |  |  |  |  |  |  |  |  |  |  |  |  |  |  |  |  |  |  |  |  |  |  |  |  |  |  |  |  |  |  |  |  |  |  |  |  |  |  |  |  |  |  |  |  |  |  |  |  |  |  |  |  |  |  |  |  |  |  |  |  |  |  |  |  |  |  |  |  |  |  |  |  |  |  |  |  |  |  |  |  |  |  |  |  |  |  |  |  |  |  |  |  |  |  |  |  |  |  |  |  |  |  |  |  |  |  |  |  |  |  |  |  |  |  |  |  |  |  |  |  |  |  |  |  |  |  |  |  |  |  |  |  |  |  |  |  |  |  |  |  |  |  |  |  |  |  |  |  |  |  |  |  |  |  |  |  |  |  |  |  |  |  |  |  |  |  |  |  |  |  |  |  |  |  |  |  |  |  |  |  |  |  |  |  |  |  |  |  |  |  |  |  |  |  |  |  |  |  |  |  |  |  |  |  |  |  |  |  |  |  |  |  |  |  |  |  |  |  |  |  |  |  |  |  |  |  |  |  |  |  |  |  |  |  |  |  |  |  |  |  |  |  |  |  |  |  |  |  |  |  |  |  |  |  |  |  |  |  |  |  |  |  |  |  |  |  |  |  |  |  |  |  |  |  |  |  |  |  |  |  |  |  |  |  |  |  |  |  |  |  |  |  |  |  |  |  |  |  |  |  |  |  |  |  |  |  |  |  |  |  |  |  |  |  |  |  |  |  |  |  |  |  |  |  |  |  |  |  |  |  |  |  |  |  |  |  |  |  |  |  |  |  |  |  |  |  |  |  |  |  |  |  |  |  |  |  |  |  |  |  |  |  |  |  |  |  |  |  |  |  |  |  |  |  |  |  |  |  |  |  |  |  |  |  |  |  |  |  |  |  |  |  |  |  |  |  |  |  |  |  |  |  |  |  |  |  |  |  |  |  |  |  |  |  |  |  |  |  |  |  |  |  |  |  |  |  |  |  |  |  |  |  |  |  |  |  |  |  |  |  |  |  |  |  |  |  |  |  |  |  |  |  |  |  |  |  |  |  |  |  |  |  |  |  |  |  |  |  |  |  |  |  |  |  |  |  |  |  |  |  |  |  |  |  |  |  |  |  |  |  |  |  |  |  |  |  |  |  |  |  |  |  |  |  |  |  |  |  |  |  |  |  |  |  |  |  |  |  |  |  |  |  |  |  |  |  |  |  |  |  |  |  |  |  |  |  |  |  |  |  |  |  |  |  |  |  |  |  |  |  |  |  |  |  |  |  |  |  |  |  |  |  |  |  |  |  |  |  |  |  |  |  |  |  |  |  |  |  |  |  |  |  |  |  |  |  |  |  |  |  |  |  |  |  |  |  |  |  |  |  |  |  |  |  |  |  |  |  |  |  |  |  |  |  |  |  |  |  |  |  |  |  |  |  |  |  |  |  |  |  |  |  |  |  |  |  |  |  |  |  |  |  |  |  |  |  |  |  |  |  |  |  |  |  |  |  |  |  |  |  |  |  |  |  |  |  |  |  |  |  |  |  |  |  |  |  |  |  |  |  |  |  |  |  |  |  |  |  |  |  |  |  |  |  |  |  |  |  |  |  |  |  |  |  |  |  |  |  |  |  |  |  |  |  |  |  |  |  |  |  |  |  |  |  |  |  |  |  |  |  |  |  |  |  |  |  |  |  |  |  |  |  |  |  |  |  |  |  |  |  |  |  |  |  |  |  |  |  |  |  |  |  |  |  |  |  |  |  |  |  |  |  |  |  |  |  |  |  |  |  |  |  |  |  |  |  |  |  |  |  |  |  |  |  |  |  |  |  |  |  |  |  |  |  |  |  |

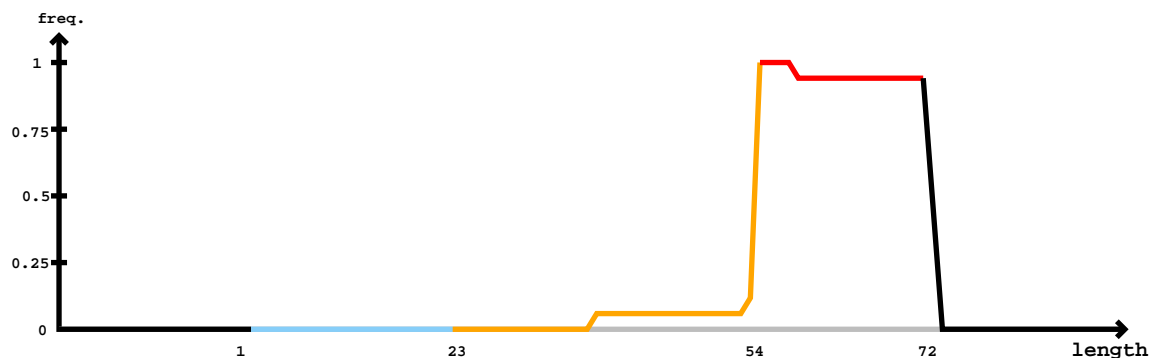

## Mature

|     |                                                                                                                                           |              |            |               |
|-----|-------------------------------------------------------------------------------------------------------------------------------------------|--------------|------------|---------------|
| 5'- | uaugcgcaauccagccag <u>aucagacaga<u>uucg</u>cgcgaag<u>augagg</u>gagaucauggucgccaaagcaacauc<u>uuggauuuugaagga</u>uuugguccuaaagucauuccug</u> | -3'          | <b>exp</b> |               |
|     | .(((.(.....(((((((..((((....((((((((((.(...)))..))))))))).....))).....)).....                                                             | <b>reads</b> | <b>mm</b>  | <b>sample</b> |
|     | .....gucgcccaaagcaacaucuugu.....                                                                                                          | 1            | 0          | S01           |
|     | .....uugugauuuAaaggauuu.....                                                                                                              | 8            | 1          | S01           |
|     | .....cuugugauuuugaaggauuu.....                                                                                                            | 1            | 0          | S02           |
|     | .....uugugauuuAaaggauuu.....                                                                                                              | 7            | 1          | S02           |

Provisional ID : Maple\_Unigene\_BMK.24178\_77414  
Score total : 0.5  
Score for star read(s) : -1.3  
Score for read counts : 0  
Score for mfe : -1.1  
Score for randfold : 0  
Score for cons. seed : 3  
Total read count : 15  
Mature read count : 15  
Loop read count : 0  
Star read count : 0

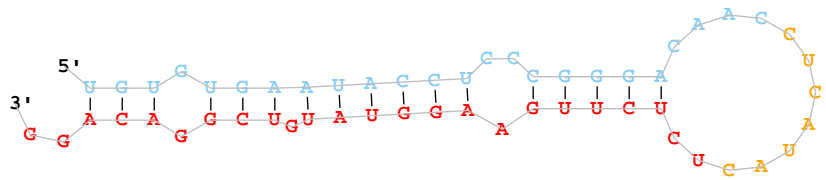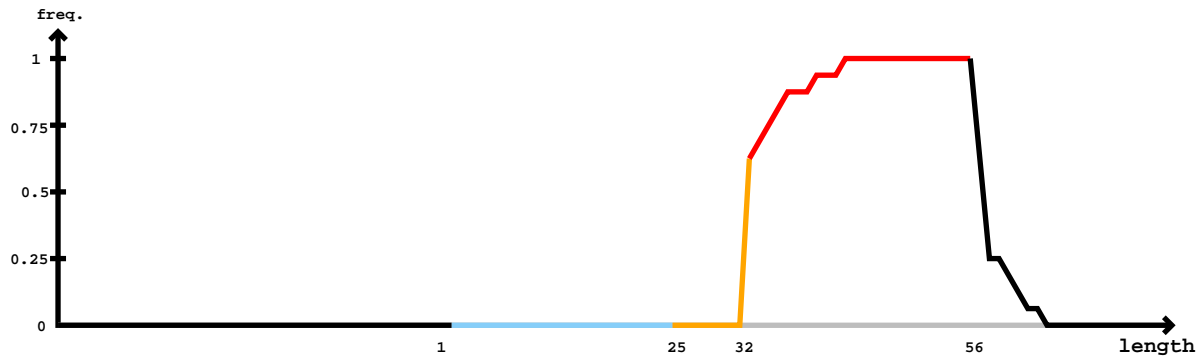

| Star |                                                                                                                   | Mature |     |  |  |  |        |
|------|-------------------------------------------------------------------------------------------------------------------|--------|-----|--|--|--|--------|
| 5' - | auccuugaucacaaacuuuuuuccuuccugaaaguaccuugugugaauaccuccgggacaaacucauacucucucugaagguaugucggacaggcggccaaaauucaggcccg | -3'    | exp |  |  |  |        |
|      | .....((((((((.....)))))).((((((((((((((((((((((((((((((((.....)))))).)))))).)))))).((((.....)))).....             | reads  | mm  |  |  |  | sample |
|      | .....ucucuugaagguaugucggacagg.....                                                                                | 6      | 0   |  |  |  | S01    |
|      | .....cucuugaagguauguaggacagg.....                                                                                 | 1      | 1   |  |  |  | S01    |
|      | .....aagguaugucggacaggcgca.....                                                                                   | 1      | 1   |  |  |  | S01    |
|      | .....ucucuugaagguaugucggacagg.....                                                                                | 4      | 0   |  |  |  | S02    |
|      | .....ucuugaagguaugucggacaggc.....                                                                                 | 1      | 0   |  |  |  | S02    |
|      | .....cuugaagguaugucggacaggcgg.....                                                                                | 1      | 0   |  |  |  | S02    |
|      | .....uugaagguaugucggacaggcggU.....                                                                                | 1      | 1   |  |  |  | S02    |
|      | .....guaugucggacaggcgAccaa.....                                                                                   | 1      | 1   |  |  |  | S02    |

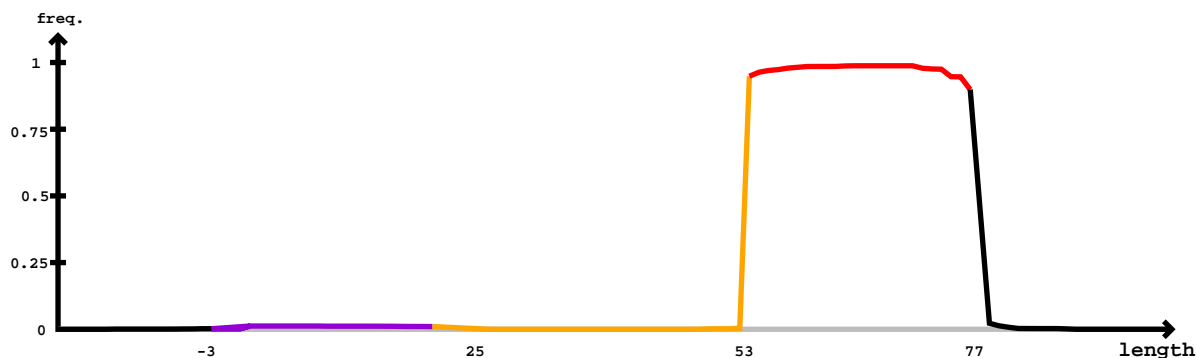

## Mature

[illegible]

## Star

## Mature

auauacuguguauuuuccauucaaauaacguuaugugguagaguaacuaaauucuaauuuauuuaucaugucacaugacgugauuuugaaggaagaacacgaugcaacguauugca

|                                       |      |   |     |
|---------------------------------------|------|---|-----|
| .....acaugacgugCuuugaauggaag.....     | 1    | 1 | S01 |
| .....acaugacgugauuuugaauggaag.....    | 80   | 0 | S01 |
| .....acauUacgugauuuugaauggaag.....    | 1    | 1 | S01 |
| .....acaCgacgugauuuugaauggaag.....    | 1    | 1 | S01 |
| .....acaugacgugGuuuugaauggaag.....    | 1    | 1 | S01 |
| .....acaugacgugGuuuugaauggaaga.....   | 8    | 1 | S01 |
| .....Ccaugacgugauuuugaauggaaga.....   | 1    | 1 | S01 |
| .....acaugacgugauuuugaGuggaaga.....   | 7    | 1 | S01 |
| .....acaugacgugCuuugaauggaaga.....    | 4    | 1 | S01 |
| .....acaugacgugauuuugaaGggaaga.....   | 2    | 1 | S01 |
| .....acaugacgugauuuugaauggaagU.....   | 9    | 1 | S01 |
| .....acaugacgugauuuugaauggaAa.....    | 4    | 1 | S01 |
| .....acaugacgugauuCgaauugaaga.....    | 7    | 1 | S01 |
| .....acaugaAgugauuuugaauggaaga.....   | 1    | 1 | S01 |
| .....acaugacguUauuuugaauggaaga.....   | 2    | 1 | S01 |
| .....Gcaugacgugauuuugaauggaaga.....   | 6    | 1 | S01 |
| .....acaugacgugauuuugaugCaaga.....    | 1    | 1 | S01 |
| .....acaugacgugaCuugaauggaaga.....    | 3    | 1 | S01 |
| .....acUugacgugauuuugaauggaaga.....   | 1    | 1 | S01 |
| .....acaugacgugauuuugaauggaagG.....   | 24   | 1 | S01 |
| .....acaugacgugauuuUaauggaaga.....    | 3    | 1 | S01 |
| .....acaugCcgugauuuugaauggaaga.....   | 1    | 1 | S01 |
| .....acaugacgugauuuAaauggaaga.....    | 3    | 1 | S01 |
| .....acaugaGgugauuuugaauggaaga.....   | 1    | 1 | S01 |
| .....acaugaUgugauuuugaauggaaga.....   | 2    | 1 | S01 |
| .....aAaugacgugauuuugaauggaaga.....   | 1    | 1 | S01 |
| .....aGaugacgugauuuugaauggaaga.....   | 1    | 1 | S01 |
| .....acaugacgugauuuugaaCggaaga.....   | 7    | 1 | S01 |
| .....acaugacgugauuuugaauggaGga.....   | 8    | 1 | S01 |
| .....acaugacgugauuuugaauggaUa.....    | 1    | 1 | S01 |
| .....Ucaugacgugauuuugaauggaaga.....   | 1    | 1 | S01 |
| .....acaAgacgugauuuugaauggaaga.....   | 1    | 1 | S01 |
| .....acaCgacgugauuuugaauggaaga.....   | 2    | 1 | S01 |
| .....acaugacgGgauuuugaauggaaga.....   | 3    | 1 | S01 |
| .....acaugacgugaAuugaauggaaga.....    | 3    | 1 | S01 |
| .....acaugacgugauCugaauggaaga.....    | 2    | 1 | S01 |
| .....acaugacgugauuuugaaugGaga.....    | 12   | 1 | S01 |
| .....acaugacgugauuGgauggaaga.....     | 2    | 1 | S01 |
| .....acaugacgugauuuugaauCgaaga.....   | 1    | 1 | S01 |
| .....acaugacguCauuuugaauggaaga.....   | 1    | 1 | S01 |
| .....acaugacgugauuuugaCuggaaga.....   | 2    | 1 | S01 |
| .....acaugacgugUuuugaauggaaga.....    | 2    | 1 | S01 |
| .....acaugacgugauuuugaauggaCa.....    | 3    | 1 | S01 |
| .....acaugacgugauuuugaauAgaaga.....   | 2    | 1 | S01 |
| .....acaugGcgugauuuugaauggaaga.....   | 5    | 1 | S01 |
| .....acaugacgCgauuuugaauggaaga.....   | 8    | 1 | S01 |
| .....acaugacAugauuuugaauggaaga.....   | 2    | 1 | S01 |
| .....acaugacgugauuuugaaugGaga.....    | 2    | 1 | S01 |
| .....acaGgacgugauuuugaauggaaga.....   | 4    | 1 | S01 |
| .....acGugacgugauuuugaauggaaga.....   | 4    | 1 | S01 |
| .....acauAacgugauuuugaauggaaga.....   | 2    | 1 | S01 |
| .....acaugacgAgaauugaauggaaga.....    | 1    | 1 | S01 |
| .....acaugacgugauuuugaauggaaga.....   | 1774 | 0 | S01 |
| .....acCugacgugauuuugaauggaaga.....   | 1    | 1 | S01 |
| .....acaugacgugauAugaauugaaga.....    | 3    | 1 | S01 |
| .....acaugacCugauuuugaauggaaga.....   | 1    | 1 | S01 |
| .....acaugacgugauuuGauggaaga.....     | 7    | 1 | S01 |
| .....acaugacgugauuuugaauUgaaga.....   | 1    | 1 | S01 |
| .....acaugacgugauuAgaauugaaga.....    | 3    | 1 | S01 |
| .....Ncaugacgugauuuugaauggaaga.....   | 2    | 1 | S01 |
| .....acaugUcgugauuuugaauggaaga.....   | 1    | 1 | S01 |
| .....acaugacgugauuuugaauggaagaA.....  | 3    | 1 | S01 |
| .....acaugacgugauuuugaauggaagau.....  | 18   | 0 | S01 |
| .....acaugacgugauuuugaauggaagaC.....  | 2    | 1 | S01 |
| .....acaugacgugauuuugaauggaagauU..... | 6    | 1 | S01 |
| .....caugacgugauuuugaaugga.....       | 1    | 0 | S01 |
| .....caugacgugauuuugaauggaag.....     | 2    | 0 | S01 |
| .....caugacgugauuuugaauggaaga.....    | 9    | 0 | S01 |
| .....cGugacgugauuuugaauggaagau.....   | 1    | 1 | S01 |
| .....caugacgugauuuugaauggaagau.....   | 28   | 0 | S01 |

## Star

## Mature

auauacuguguaauuuuccauucaaauaacguuaugugguagaguaacuaaauucuaauuuauuaucaugucacaugacgugauuuugaaggaagaUacacgaugcaacguaugca

|                                     |     |   |     |
|-------------------------------------|-----|---|-----|
| .....caugacgugauuuugaaggaagaG.....  | 1   | 1 | S01 |
| .....caugacgugauuuugaaggaagaC.....  | 6   | 1 | S01 |
| .....caugacAugauuuugaaggaagau.....  | 1   | 1 | S01 |
| .....caugacgugauuuugaaggaagauU..... | 2   | 1 | S01 |
| .....caugacgugauuuugaaggaagauC..... | 1   | 1 | S01 |
| .....caugacgugauuuugaaggaagauG..... | 1   | 1 | S01 |
| .....augacAugauuuugaagga.....       | 1   | 1 | S01 |
| .....augacAugauuuugaagggaa.....     | 1   | 1 | S01 |
| .....augacgugauuuugaaggaaga.....    | 2   | 0 | S01 |
| .....augacgugauuuugaaggaagau.....   | 2   | 0 | S01 |
| .....augacgugauuuugaaggaagauU.....  | 2   | 1 | S01 |
| .....augacgugauuuugaaggaagaua.....  | 6   | 0 | S01 |
| .....ugacgugauuuugaaggaaga.....     | 3   | 0 | S01 |
| .....ugacgugauuuugaaggaagauU.....   | 1   | 1 | S01 |
| .....ugacgugauuuugaaggaagauac.....  | 3   | 0 | S01 |
| .....ugacgugauuuugaaggaagauacC..... | 1   | 1 | S01 |
| .....gacgugauuuugaaggaaga.....      | 1   | 1 | S01 |
| .....gaUgugauuuugaaggaagauac.....   | 1   | 1 | S01 |
| .....gacgugauuuugaaggaagauaU.....   | 1   | 1 | S01 |
| .....gacgugauuuugaaggaagauac.....   | 1   | 0 | S01 |
| .....gaGgugauuuugaaggaagauac.....   | 1   | 1 | S01 |
| .....gacgugauuuugaaggaagauac.....   | 1   | 1 | S01 |
| .....gaUgugauuuugaaggaagauaca.....  | 1   | 1 | S01 |
| .....gacgugauuuugaaggaagauaca.....  | 8   | 0 | S01 |
| .....gacgugauuuugaaggaagauacaA..... | 1   | 1 | S01 |
| .....acgugauuuugaaggaaga.....       | 1   | 0 | S01 |
| .....acgugauuuugaaggaagaua.....     | 1   | 0 | S01 |
| .....acgugauuuugaaggaagauaca.....   | 1   | 0 | S01 |
| .....cgugauuuugaaggaaga.....        | 2   | 0 | S01 |
| .....cguaauuuugaaggaagauac.....     | 1   | 1 | S01 |
| .....cgugauuuugaaggaagauac.....     | 6   | 0 | S01 |
| .....gauuuugaaggaagauacacgaug.....  | 1   | 0 | S01 |
| .....auuuugaaggaagauacacgaug.....   | 1   | 0 | S01 |
| .....auuuugaaggaagauacacgaugC.....  | 2   | 0 | S01 |
| .....auuuugaaggaagauacacgaugU.....  | 1   | 1 | S01 |
| .....uuugaaggaagauacacgaug.....     | 2   | 0 | S01 |
| .....acCguguaauuuuccauucaaau.....   | 2   | 1 | S02 |
| .....auuuuccauucaaauaacguuGug.....  | 1   | 1 | S02 |
| .....uuuccauucaaauaacguuGu.....     | 1   | 1 | S02 |
| .....uuuccauucaaauaacguuGugug.....  | 1   | 1 | S02 |
| .....auucaaauaacguuGugugguaug.....  | 14  | 1 | S02 |
| .....auucaaauaacguuauugugguacG..... | 2   | 1 | S02 |
| .....auucaaauaacguuauugugguaug..... | 8   | 0 | S02 |
| .....augCcacaugacgugauuuugaau.....  | 1   | 1 | S02 |
| .....ugCcacaugacgugauuuugaau.....   | 3   | 1 | S02 |
| .....cacaugacgugauuuugaagga.....    | 2   | 0 | S02 |
| .....cacaugacgugauuuugaaggaag.....  | 5   | 0 | S02 |
| .....acGugacgugauuuugaau.....       | 1   | 1 | S02 |
| .....acaugacgugauuuugaacC.....      | 1   | 1 | S02 |
| .....acaugacgugauuuugaau.....       | 14  | 0 | S02 |
| .....acaugacgugGuuuugaug.....       | 1   | 1 | S02 |
| .....acaugacgugauuuugaau.....       | 2   | 0 | S02 |
| .....acaugacgugauuuugaagg.....      | 2   | 0 | S02 |
| .....acaugacgugGuuuugaagga.....     | 2   | 1 | S02 |
| .....Ucaugacgugauuuugaagga.....     | 1   | 1 | S02 |
| .....acaugacgugauuuugaauCga.....    | 1   | 1 | S02 |
| .....acaugacgugaGuugaagga.....      | 1   | 1 | S02 |
| .....acaugacgugauuuugaaggG.....     | 2   | 1 | S02 |
| .....acaugacgugauuuugaagga.....     | 60  | 0 | S02 |
| .....acauAacgugauuuugaagga.....     | 1   | 1 | S02 |
| .....acaCgacgugauuuugaagga.....     | 1   | 1 | S02 |
| .....acaugGcgugauuuugaaggaag.....   | 1   | 1 | S02 |
| .....acaugacgugauuuugaCuggaag.....  | 1   | 1 | S02 |
| .....acaugacgugauuuugaaggaag.....   | 110 | 0 | S02 |
| .....acaugacgugauuuugaaggaGg.....   | 2   | 1 | S02 |
| .....acaugacgugauuuCauggaag.....    | 1   | 1 | S02 |
| .....acaugacgugauCugaaggaag.....    | 1   | 1 | S02 |
| .....acaugacgugauuuugaaggUag.....   | 1   | 1 | S02 |
| .....acaugacgGgauuugaaggaag.....    | 1   | 1 | S02 |

## Star

## Mature

auauacuguguauuuuccauucaaauaacguuaugugguagaguaacuaaauucuaauuuauuuaucaugucacaugacgugauuuugaaggaagaacacgaugcaacguaugca

|                                       |      |   |     |
|---------------------------------------|------|---|-----|
| .....acaugacgAgaauuugaauuggaag.....   | 1    | 1 | S02 |
| .....aAaugacgugauuuugaauuggaag.....   | 1    | 1 | S02 |
| .....acaugacgugauuuugaauAgaag.....    | 1    | 1 | S02 |
| .....acaugacgugauuuugaauuggaAA.....   | 5    | 1 | S02 |
| .....acaCgacgugauuuugaauuggaag.....   | 1    | 1 | S02 |
| .....acaugacgugauuuugaauAaag.....     | 1    | 1 | S02 |
| .....acaugacgugauuuugaauuggaagG.....  | 89   | 1 | S02 |
| .....acaugacgugauuuugaauUgaaga.....   | 1    | 1 | S02 |
| .....acaugacgugauuGgauggaaga.....     | 3    | 1 | S02 |
| .....acaugacgugauuuugaauuggaGga.....  | 8    | 1 | S02 |
| .....acaugacgugauuuugaauuggaAUa.....  | 1    | 1 | S02 |
| .....acaAgacgugauuuugaauuggaaga.....  | 1    | 1 | S02 |
| .....acaugacgugauuugCauggaaga.....    | 1    | 1 | S02 |
| .....acaugacgGgaauugaauuggaaga.....   | 1    | 1 | S02 |
| .....acaugacgugauuuugaauugAaaga.....  | 6    | 1 | S02 |
| .....acaugacgugauuuugaCuggaaga.....   | 1    | 1 | S02 |
| .....acaugacguUauuuugaauuggaaga.....  | 1    | 1 | S02 |
| .....acaugacgugauuuugaauuggaagU.....  | 16   | 1 | S02 |
| .....Ucaugacgugauuuugaauuggaaga.....  | 1    | 1 | S02 |
| .....acaugacgugauuuugaAAggaaga.....   | 2    | 1 | S02 |
| .....Ncaugacgugauuuugaauuggaaga.....  | 1    | 1 | S02 |
| .....acaugacgugauCugaauuggaaga.....   | 4    | 1 | S02 |
| .....aGaugacgugauuuugaauuggaaga.....  | 1    | 1 | S02 |
| .....acGugacgugauuuugaauuggaaga.....  | 7    | 1 | S02 |
| .....acaugacgugaGuugaauuggaaga.....   | 1    | 1 | S02 |
| .....acaugCcgugauuuugaauuggaaga.....  | 1    | 1 | S02 |
| .....acaugacgugauuGgauggaaga.....     | 1    | 1 | S02 |
| .....acaugacgugauuuugaauugCaaga.....  | 1    | 1 | S02 |
| .....acaugacguCauuuugaauuggaaga.....  | 2    | 1 | S02 |
| .....acaugacgugauuuugaauuggaaga.....  | 1930 | 0 | S02 |
| .....acaugacAugauuuugaauuggaaga.....  | 5    | 1 | S02 |
| .....acaugacgugUuuugaauuggaaga.....   | 1    | 1 | S02 |
| .....acaugacgugauuuugaauuggUaga.....  | 1    | 1 | S02 |
| .....acaugacgugCuuuugaauuggaaga.....  | 3    | 1 | S02 |
| .....acaugacgugauuuugaauuggaUga.....  | 1    | 1 | S02 |
| .....acaugacgugauuuugaaGggaaga.....   | 2    | 1 | S02 |
| .....acaugaAgugauuuugaauuggaaga.....  | 2    | 1 | S02 |
| .....aUaugacgugauuuugaauuggaaga.....  | 4    | 1 | S02 |
| .....Gcaugacgugauuuugaauuggaaga.....  | 4    | 1 | S02 |
| .....acaugacgugauuuugaauuggGaga.....  | 7    | 1 | S02 |
| .....acaugacCugauuuugaauuggaaga.....  | 1    | 1 | S02 |
| .....acaugacguAAuuugaauuggaaga.....   | 1    | 1 | S02 |
| .....acaugacgugaCuugaauuggaaga.....   | 5    | 1 | S02 |
| .....acaugacgugauuuugaaCggaaga.....   | 5    | 1 | S02 |
| .....acaugaUgugauuuugaauuggaaga.....  | 1    | 1 | S02 |
| .....acaugacgugauuuugaauuggaAA.....   | 9    | 1 | S02 |
| .....acaugacUugauuuugaauuggaaga.....  | 1    | 1 | S02 |
| .....acaugacgugauGugaauuggaaga.....   | 2    | 1 | S02 |
| .....acaugacgugauuugGauggaaga.....    | 7    | 1 | S02 |
| .....acaugacgugauuuugaGuggaaga.....   | 9    | 1 | S02 |
| .....acaugacgugauuuugaauuggaagC.....  | 3    | 1 | S02 |
| .....acaugacgugauuuugaauAgaaga.....   | 3    | 1 | S02 |
| .....acaugGcgugauuuugaauuggaaga.....  | 7    | 1 | S02 |
| .....acaugacgugauuuUaauggaaga.....    | 6    | 1 | S02 |
| .....acaugacgugGuuuugaauuggaaga.....  | 9    | 1 | S02 |
| .....acaugUcgugauuuugaauuggaaga.....  | 1    | 1 | S02 |
| .....acaugacgugauuuCaauggaaga.....    | 1    | 1 | S02 |
| .....acaCgacgugauuuugaauuggaaga.....  | 3    | 1 | S02 |
| .....acaugacgCgaauugaauuggaaga.....   | 3    | 1 | S02 |
| .....acaGgacgugauuuugaauuggaaga.....  | 7    | 1 | S02 |
| .....acaugacgugauuAgaauuggaaga.....   | 1    | 1 | S02 |
| .....acaugacgugaAuugaauuggaaga.....   | 3    | 1 | S02 |
| .....acauAacgugauuuugaauuggaaga.....  | 2    | 1 | S02 |
| .....acaugacgugauuugUauggaaga.....    | 4    | 1 | S02 |
| .....acaugacgAgauuuugaauuggaaga.....  | 8    | 1 | S02 |
| .....acaugGcgugauuuugaauuggaagau..... | 1    | 1 | S02 |
| .....acaugacguAAuuugaauuggaagau.....  | 1    | 1 | S02 |
| .....acaugacgugauuGgauggaagau.....    | 1    | 1 | S02 |
| .....acaugacgugauuuugaauuggaagaG..... | 3    | 1 | S02 |
| .....acaugacgugauuuugaauuggaagaA..... | 9    | 1 | S02 |

## Star

## Mature

auauacuguguauuuuuccauucaaauaacguuuaugugguagaguaacuaaucucauuuauuuaucaugucacacgaugcgaugcaacguauugca

|                                       |    |   |     |
|---------------------------------------|----|---|-----|
| .....acaugacgugauAugaauggaagau.....   | 1  | 1 | S02 |
| .....acaugacgugauuugaauggaagau.....   | 19 | 0 | S02 |
| .....acaugacgugauuuugaauggaagaC.....  | 3  | 1 | S02 |
| .....acaugacgGgauuuugaauggaagau.....  | 1  | 1 | S02 |
| .....acaugacgugauuugaauggaagauU.....  | 1  | 1 | S02 |
| .....acaugacgugauuuugaauggaagauC..... | 1  | 1 | S02 |
| .....caugacgugauuuugaaugga.....       | 1  | 0 | S02 |
| .....caugacgugauuugaauggaag.....      | 2  | 0 | S02 |
| .....caugacgGgauuuugaauggaag.....     | 1  | 1 | S02 |
| .....caugacgugauuuugaauggaaga.....    | 4  | 0 | S02 |
| .....caugacgugauuugaauggaagau.....    | 8  | 0 | S02 |
| .....caugacgugauuuugaauggaagaA.....   | 1  | 1 | S02 |
| .....caugacgugauuuugaauggaagauU.....  | 3  | 1 | S02 |
| .....augacgugauuuugaaugga.....        | 1  | 0 | S02 |
| .....augacgugauuuugaauggaagau.....    | 3  | 0 | S02 |
| .....augacgugauuuugaauggaagauU.....   | 2  | 1 | S02 |
| .....augacgugauuuugaaCggaagaua.....   | 1  | 1 | S02 |
| .....augGcgugauuuugaauggaagaua.....   | 1  | 1 | S02 |
| .....augacgCgauuuugaauggaagaua.....   | 1  | 1 | S02 |
| .....augacgugauuuugaauggaagaua.....   | 10 | 0 | S02 |
| .....ugacgugauuuugaauggaaga.....      | 2  | 0 | S02 |
| .....ugacgugauuuugaauggaagauU.....    | 2  | 1 | S02 |
| .....ugacgugauuuugaauggaagauaU.....   | 1  | 1 | S02 |
| .....ugacgugauuuugaauggaagauac.....   | 3  | 0 | S02 |
| .....gacgugauuuugaauggGagauac.....    | 1  | 1 | S02 |
| .....gacgugauuuugaauggaagauac.....    | 2  | 0 | S02 |
| .....gacgugauuuugaauggaagauacG.....   | 2  | 1 | S02 |
| .....gacgugauuuugaauggaAauaca.....    | 1  | 1 | S02 |
| .....gaUgugauuuugaauggaagauaca.....   | 1  | 1 | S02 |
| .....gacgugauuuugaauggaagauacC.....   | 2  | 1 | S02 |
| .....gacgugauuuugaauggaagauaca.....   | 3  | 0 | S02 |
| .....acgugauuuugaauggaag.....         | 1  | 0 | S02 |
| .....acgugauuuugaauggaaga.....        | 2  | 0 | S02 |
| .....acgugauuuugaauggaagau.....       | 2  | 0 | S02 |
| .....acgugaGuugaauggaagaua.....       | 1  | 1 | S02 |
| .....acgugauuuugaauggaagaua.....      | 3  | 0 | S02 |
| .....acgugauuuugaauggaagauaca.....    | 1  | 0 | S02 |
| .....acgugauuuugaauggaagauacacU.....  | 1  | 1 | S02 |
| .....cgugauuuugaauggaagaua.....       | 1  | 0 | S02 |
| .....cgugauuuugaauUgaagauac.....      | 1  | 1 | S02 |
| .....cgugauuuugaauggaagauUc.....      | 1  | 1 | S02 |
| .....cgugauuuugaauggaagauac.....      | 1  | 0 | S02 |
| .....cgugauuuugaauggaagGuac.....      | 1  | 1 | S02 |
| .....cgugauuuugauggGagauac.....       | 1  | 1 | S02 |
| .....gugauuuugaauggaagauacU.....      | 1  | 1 | S02 |
| .....auuugaauggaagauacacgaug.....     | 2  | 0 | S02 |
| .....auuugaauggaagauacacgaugc.....    | 3  | 0 | S02 |
| .....uuugaauggaagauacacgaugc.....     | 1  | 0 | S02 |



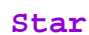[illegible]

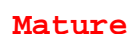[illegible]

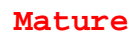

| 5'- | gaaagcuggggccuccaaagauuaacggaggggucuccug                                                         | <b>ucggacacaauguguaacguggucacucgugauggu</b> | <b>gauuggaauugccuuugcaucggauc</b> | gacaugaucgggguucggg               | -3'                 | obs |
|-----|--------------------------------------------------------------------------------------------------|---------------------------------------------|-----------------------------------|-----------------------------------|---------------------|-----|
|     | gaaagcuggggccuccaaagauuaacggaggggucuccug                                                         | <b>cggacacaauguguaacguggucac</b>            | <b>cugauggu</b>                   | <b>gauuggaauugccuuugcaucggauc</b> | gacaugaucgggguucggg | exp |
|     | .....((((((((.....(((((((((((((.(.(((.(((((.(((((((...)))))))).).)))))).).).)))))).).)))))))).). | reads                                       | mm                                | sample                            |                     |     |
|     | .....ucggacacaauguguaacG.....                                                                    | 1                                           | 1                                 | S01                               |                     |     |
|     | .....gauuggaauugccuuugcaucggaug.....                                                             | 1                                           | 0                                 | S01                               |                     |     |

Provisional ID : Maple\_Unigene\_BMK.29814\_121210  
 Score total : 2.7  
 Score for star read(s) : 3.9  
 Score for read counts : -4.9  
 Score for mfe : 0.8  
 Score for randfold : 0  
 Score for cons. seed : 3  
 Total read count : 2  
 Mature read count : 1  
 Loop read count : 0  
 Star read count : 1

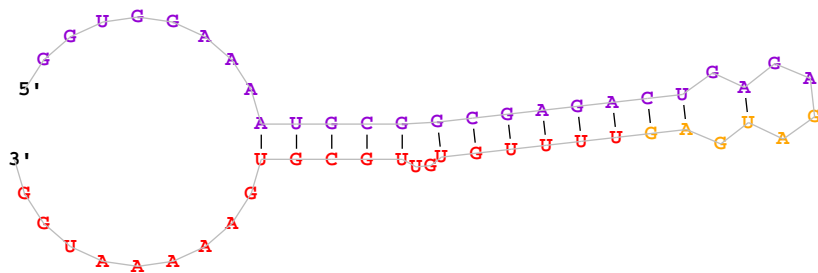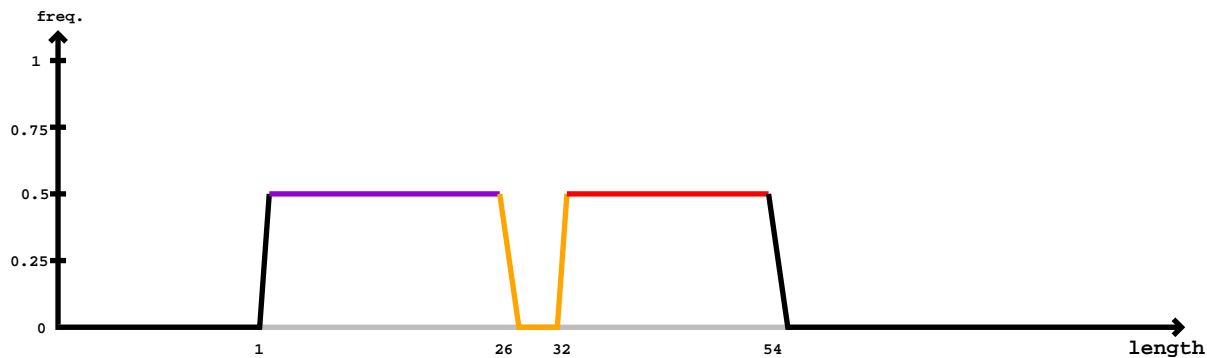

Star

Mature

| 5' - |                                                                                                                          | -3'   | obs |        |  |
|------|--------------------------------------------------------------------------------------------------------------------------|-------|-----|--------|--|
|      | gauuugguuucguuuucggcggugggaaaaugcggcgagacugagagaugaguuuuuguguugcgugaaaaaugggauguguguuucgggagagacgcgucggcggaagcagguaggaa  |       |     |        |  |
|      | gauuugguuucguuuucggcggugggaaaaugcggcgagacuagagagaugaguuuuuguguugcgugaaaaaugggauguguguuucgggagagacgcgucggcggaagcagguaggaa | exp   |     |        |  |
|      | .....(((((((.....((.....((((((((((((((.....)))))))))))))))).....))))(((((((.....)))))))))))).....                        | reads | mm  | sample |  |
|      | .....ggugggaaaaugcggcgagacugaga.....uuuuuguguugcgugaaaaaugg.....                                                         | 1     | 0   | S01    |  |
|      | .....uuuuuguguugcgugaaaaaugg.....                                                                                        | 1     | 0   | S02    |  |

Provisional ID : Maple\_Unigene\_BMK.30577\_128567  
Score total : 1.2  
Score for star read(s) : -1.3  
Score for read counts : 0  
Score for mfe : -0.4  
Score for randfold : 0  
Score for cons. seed : 3  
Total read count : 18  
Mature read count : 18  
Loop read count : 0  
Star read count : 0

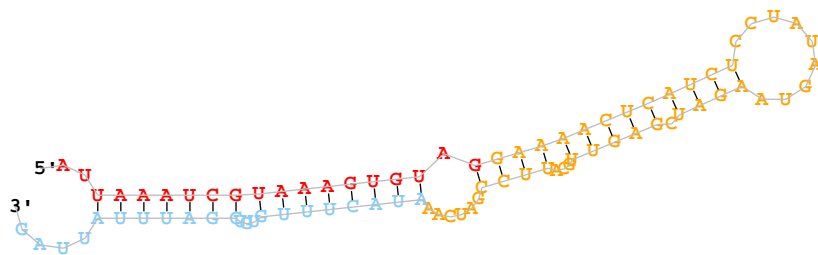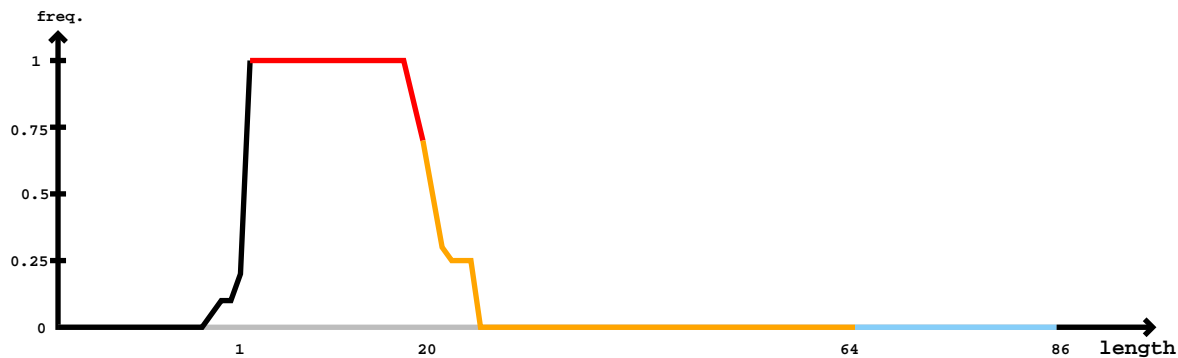

**Mature**

**Star**

| 5'                                                                                                              | -3'   | exp |        |
|-----------------------------------------------------------------------------------------------------------------|-------|-----|--------|
| ucucacauuugaccguuaauuaaaucguaaaguguaggaaaaucaucuccuauaguaagaucgaguugcauuccgaucaaaauacuuugugucgauuuuuaggucguugua | reads | mm  | sample |
| .....uuUauuaaaucguaaagugu.....                                                                                  | 1     | 1   | S01    |
| .....Cauuaaaucguaaagugu.....                                                                                    | 1     | 1   | S01    |
| .....aaauaaucguaaaguAuagga.....                                                                                 | 1     | 1   | S01    |
| .....auuaaaucguaaaguguG.....                                                                                    | 2     | 1   | S01    |
| .....auuaaaucguaaaguguGg.....                                                                                   | 1     | 1   | S01    |
| .....auuaaaucguaaaguguUg.....                                                                                   | 3     | 1   | S01    |
| .....auuaaaucguaaaguguAag.....                                                                                  | 1     | 1   | S01    |
| .....auuaaaucguaaaguguaggaaGa.....                                                                              | 2     | 1   | S01    |
| .....auuaaaucguaaaguguGggaaaa.....                                                                              | 1     | 1   | S01    |
| .....guCaauuaaaucguaaagugu.....                                                                                 | 1     | 1   | S02    |
| .....auuaaaucguaaaguguG.....                                                                                    | 1     | 1   | S02    |
| .....auuaaaucguaaaguguGg.....                                                                                   | 1     | 1   | S02    |
| .....auuaaaucguaaaguguGgg.....                                                                                  | 2     | 1   | S02    |
| .....auuaaaucguaaaguguaggaaGa.....                                                                              | 2     | 1   | S02    |

Provisional ID : Maple\_Unigene\_BMK.32446\_145133  
Score total : 19  
Score for star read(s) : 3.9  
Score for read counts : 18  
Score for mfe : -2.1  
Score for randfold : 0  
Score for cons. seed : -0.6  
Total read count : 47  
Mature read count : 46  
Loop read count : 0  
Star read count : 1

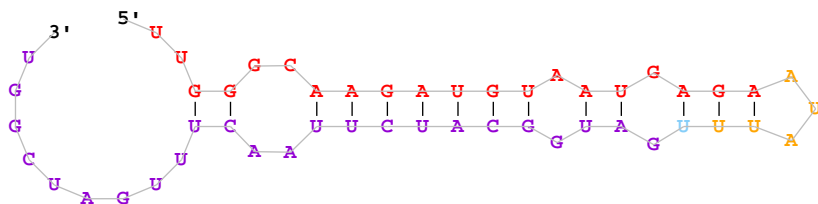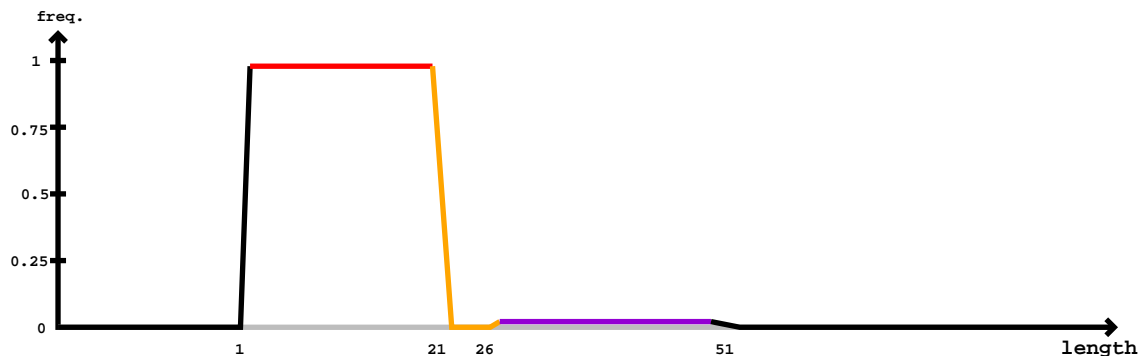

## Mature Star

| 5' - |                                                                                                                                                                    | -3' | obs   |     |        |
|------|--------------------------------------------------------------------------------------------------------------------------------------------------------------------|-----|-------|-----|--------|
|      |                                                                                                                                                                    |     | exp   |     |        |
|      |                                                                                                                                                                    |     | reads | mm  | sample |
|      | aacugaggcgaugauacaa <u>uggggcaag</u> auguaa <u>augaga</u> aa <u>uuuu</u> <u>gauggc</u> aucuua <u>acuu</u> <u>ugaucgg</u> ucauguuacggguaugaucagaagaacuaccaugagcucua |     |       |     |        |
|      | aacugaggcgaugauacaa <u>uggggcaag</u> auguaa <u>augaga</u> aa <u>uuuu</u> <u>gauggc</u> aucuua <u>acuu</u> <u>ugaucgg</u> ucauguuacggguaugaucagaagaacuaccaugagcucua |     |       |     |        |
|      | ..(((..(((.....((..(((.....((.....))))..))))..))..)).....))))..))..)).....(((.....))..))..                                                                         |     |       |     |        |
|      | .....uugggcaagauguaa <u>augag</u> U.....                                                                                                                           | 1   | 1     | S01 |        |
|      | .....uugggcaagauguaa <u>augag</u> C.....                                                                                                                           | 1   | 1     | S01 |        |
|      | .....uugAgcaagauguaa <u>augaga</u> .....                                                                                                                           | 7   | 1     | S01 |        |
|      | .....uugggcaagauguaa <u>augag</u> Ca.....                                                                                                                          | 1   | 1     | S01 |        |
|      | .....uugggcaagauguaa <u>augag</u> C.....                                                                                                                           | 3   | 1     | S02 |        |
|      | .....uugAgcaagauguaa <u>augaga</u> .....                                                                                                                           | 23  | 1     | S02 |        |
|      | .....uugAgcaagauguaa <u>augagaa</u> .....                                                                                                                          | 1   | 1     | S02 |        |
|      | .....uugggcaagauguaa <u>augag</u> Ca.....                                                                                                                          | 9   | 1     | S02 |        |
|      | .....gauggc <u>aucuua</u> acuu <u>ugaucgg</u> G.....                                                                                                               | 1   | 1     | S02 |        |

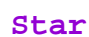[illegible]





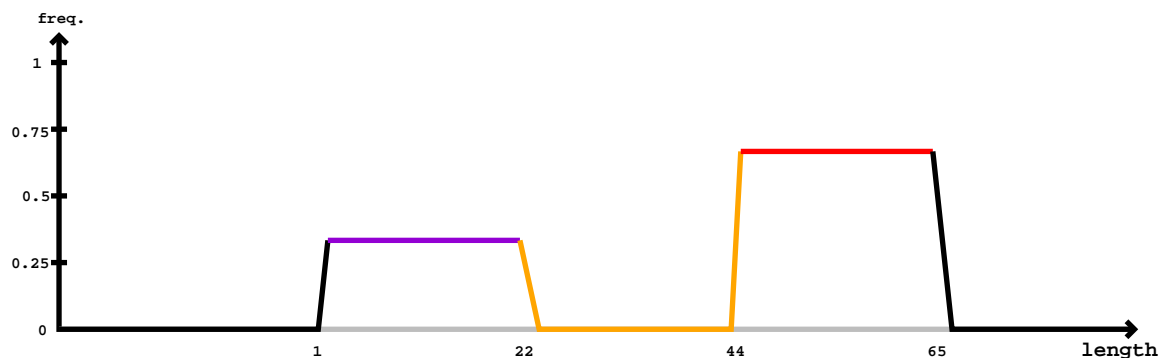

## Mature

[illegible]

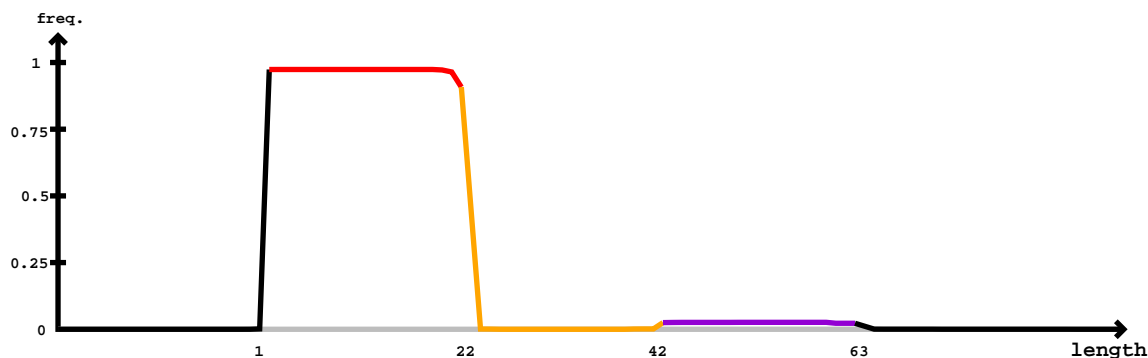

Star

[illegible]

## Mature

## Star

aaaugucucagauuuuguuaaugacagaagauacugaaagcuaaauuuuuuuuuugaucauaugcguucaguuucucugucauuaaugaauucuaagacaaauaucguuga

|                                           |      |   |     |
|-------------------------------------------|------|---|-----|
| .....ugacagaagUuacugaaagc.....            | 1    | 1 | S01 |
| .....ugacagaagauacugGaaagc.....           | 1    | 1 | S01 |
| .....ugacagaaggaGacugaaagcu.....          | 6    | 1 | S01 |
| .....ugacagaagauUcugaaagcu.....           | 2    | 1 | S01 |
| .....ugacagaagauacugaaaA <u>cu</u> .....  | 12   | 1 | S01 |
| .....Agacagaagauacugaaagcu.....           | 9    | 1 | S01 |
| .....ugacagaagauaUugaaagcu.....           | 4    | 1 | S01 |
| .....ugacagaagauCcugaaagcu.....           | 2    | 1 | S01 |
| .....ugacagaCgauacugaaagcu.....           | 5    | 1 | S01 |
| .....ugaAagaagauacugaaagcu.....           | 11   | 1 | S01 |
| .....ugCcagaagauacugaaagcu.....           | 3    | 1 | S01 |
| .....ugacagaA <u>C</u> auacugaaagcu.....  | 1    | 1 | S01 |
| .....ugacagaA <u>A</u> uacugaaagcu.....   | 3    | 1 | S01 |
| .....ugacagaagauacGgaaagcu.....           | 4    | 1 | S01 |
| .....ugacagaagauA <u>u</u> gaaagcu.....   | 6    | 1 | S01 |
| .....uAacagaagauacugaaagcu.....           | 12   | 1 | S01 |
| .....ugacGgaagauacugaaagcu.....           | 26   | 1 | S01 |
| .....ugacCgaagauacugaaagcu.....           | 1    | 1 | S01 |
| .....ugaGagaagauacugaaagcu.....           | 22   | 1 | S01 |
| .....Cgacagaagauacugaaagcu.....           | 19   | 1 | S01 |
| .....ugacagaagaCacugaaagcu.....           | 15   | 1 | S01 |
| .....ugacagaagauacuAaaagcu.....           | 11   | 1 | S01 |
| .....ugacagaagauacugaaagU <u>u</u> .....  | 49   | 1 | S01 |
| .....ugaUagaagauacugaaagcu.....           | 6    | 1 | S01 |
| .....ugacagaagCuacugaaagcu.....           | 2    | 1 | S01 |
| .....ugacagaGgauacugaaagcu.....           | 28   | 1 | S01 |
| .....ugacagaagauacugaaG <u>cu</u> .....   | 34   | 1 | S01 |
| .....ugacagaagauacugaUagcu.....           | 1    | 1 | S01 |
| .....ugacagaagaAacugaaagcu.....           | 3    | 1 | S01 |
| .....ugacagaagGuacugaaagcu.....           | 29   | 1 | S01 |
| .....ugacUgaagauacugaaagcu.....           | 5    | 1 | S01 |
| .....ugacagaUgauacugaaagcu.....           | 2    | 1 | S01 |
| .....ugacagaagauacAgaagcu.....            | 7    | 1 | S01 |
| .....ugacaCaagauacugaaagcu.....           | 5    | 1 | S01 |
| .....ugacagaagauacugaaagG.....            | 198  | 1 | S01 |
| .....ugGcagaagauacugaaagcu.....           | 35   | 1 | S01 |
| .....ugacaUaagauacugaaagcu.....           | 2    | 1 | S01 |
| .....ugacagaagauacugUaagcu.....           | 3    | 1 | S01 |
| .....ugacagaagauacugaCagcu.....           | 1    | 1 | S01 |
| .....Ngacagaagauacugaaagcu.....           | 5    | 1 | S01 |
| .....ugacagaagauaGugaagcu.....            | 3    | 1 | S01 |
| .....ugacagaagauacugaaC <u>cu</u> .....   | 1    | 1 | S01 |
| .....ugacagaagauacugaaU <u>cu</u> .....   | 2    | 1 | S01 |
| .....uCacagaagauacugaaagcu.....           | 4    | 1 | S01 |
| .....ugacagaagauacugaaaU <u>cu</u> .....  | 3    | 1 | S01 |
| .....uUacagaagauacugaaagcu.....           | 5    | 1 | S01 |
| .....ugacagaagauacugGaa <u>cu</u> .....   | 32   | 1 | S01 |
| .....ugacagGagauacugaaagcu.....           | 13   | 1 | S01 |
| .....ugacagaagauacugaaagG <u>u</u> .....  | 1    | 1 | S01 |
| .....ugacagaagauacugaGagcu.....           | 19   | 1 | S01 |
| .....ugacagaA <u>U</u> auacugaaagcu.....  | 2    | 1 | S01 |
| .....ugacagaagauacuCaaagcu.....           | 2    | 1 | S01 |
| .....ugacagaagauacugaaaC <u>cu</u> .....  | 5    | 1 | S01 |
| .....ugacagaagUuacugaaagcu.....           | 5    | 1 | S01 |
| .....ugacagaagauacugaaagA <u>u</u> .....  | 3    | 1 | S01 |
| .....ugacagaagauGcugaaagcu.....           | 15   | 1 | S01 |
| .....Ggacagaagauacugaaagcu.....           | 8    | 1 | S01 |
| .....ugacagUagauacugaaagcu.....           | 2    | 1 | S01 |
| .....ugacagaagauacugCaagcu.....           | 10   | 1 | S01 |
| .....ugacagaagauacCgaaagcu.....           | 17   | 1 | S01 |
| .....ugacagaagauacugaaagC <u>A</u> .....  | 272  | 1 | S01 |
| .....ugacaAaagauacugaaagcu.....           | 10   | 1 | S01 |
| .....ugacagaagauacugaaagC <u>C</u> .....  | 818  | 1 | S01 |
| .....ugUcagaagauacugaaagcu.....           | 4    | 1 | S01 |
| .....ugacagaagauacugaaagcu.....           | 6281 | 0 | S01 |
| .....ugacagaagauacugaaagC <u>Ca</u> ..... | 1    | 1 | S01 |
| .....ugacagaagauacugaaagC <u>U</u> .....  | 108  | 1 | S01 |
| .....ugGcagaagauacugaaagc <u>ua</u> ..... | 1    | 1 | S01 |
| .....ugacagaagauacugaaagc <u>ua</u> ..... | 8    | 0 | S01 |
| .....ugacagaagGuacugaaagc <u>ua</u> ..... | 1    | 1 | S01 |

## Mature

## Star

aaaugucugauuuuguuaaugacagaagauacugaaagcuaaauuuuuuuuuugaucauaugcguucaguuuucucugucauuaaugaauucuaagacaaauaucguuga

|                                     |     |   |     |
|-------------------------------------|-----|---|-----|
| .....ugacagaagauacugaaagcuG.....    | 4   | 1 | S01 |
| .....ugacagaagauacugaaagcuC.....    | 14  | 1 | S01 |
| .....ugacagaagauacugaaagUua.....    | 3   | 1 | S01 |
| .....ugacagaagauacCgaaagcua.....    | 1   | 1 | S01 |
| .....ugacagaagauacugaaagcuaC.....   | 1   | 1 | S01 |
| .....ugacagaagauacugaaagcuaau.....  | 1   | 0 | S01 |
| .....ugacagaagauacugaaagcuaUu.....  | 2   | 1 | S01 |
| .....gacagaagauacugaaagc.....       | 1   | 0 | S01 |
| .....augcguucaguuuucGcugucauu.....  | 1   | 1 | S01 |
| .....augcguucaguuuucucugucauu.....  | 5   | 0 | S01 |
| .....augcAuucaguuuucucugucauu.....  | 1   | 1 | S01 |
| .....ugcguucaguuuucucugucauC.....   | 1   | 1 | S01 |
| .....ugcguucaguuuucucugucauu.....   | 1   | 0 | S01 |
| .....cguucaguuuucucuguc.....        | 29  | 0 | S01 |
| .....cguucaguuuucucuguU.....        | 2   | 1 | S01 |
| .....cAuucaguuuucucuguc.....        | 6   | 1 | S01 |
| .....cguucaguuuucUuguc.....         | 1   | 1 | S01 |
| .....cguucaguuuUucuguc.....         | 1   | 1 | S01 |
| .....cguucagCauuucucuguc.....       | 1   | 1 | S01 |
| .....cguucaguuuucUgugucauu.....     | 1   | 1 | S01 |
| .....cguucaguuuucucugucauC.....     | 9   | 1 | S01 |
| .....cguucaguuuGcucugucauu.....     | 1   | 1 | S01 |
| .....cguucagAuucucugucauu.....      | 1   | 1 | S01 |
| .....cguucaguuuucucugucau.....      | 88  | 0 | S01 |
| .....cguucaguuuucucugucauu.....     | 1   | 1 | S01 |
| .....cguuGaguuuucucugucauu.....     | 1   | 1 | S01 |
| .....cguucaguuuucucugucGuu.....     | 1   | 1 | S01 |
| .....cAuucaguuuucucugucauu.....     | 80  | 1 | S01 |
| .....cguucaguuuucucugucauA.....     | 1   | 1 | S01 |
| .....cguucaguuuucucugucauuG.....    | 1   | 1 | S01 |
| .....Auucaguuuucucugucauu.....      | 4   | 1 | S01 |
| .....uucaguuuucucugucauu.....       | 1   | 0 | S01 |
| .....uucaguuuucucugucauC.....       | 1   | 1 | S01 |
| .....auucucugucauuaaugGauu.....     | 1   | 1 | S01 |
| .....auucucugucauuaaugaaau.....     | 1   | 0 | S01 |
| .....auucucugucauuaaugaaauucua..... | 1   | 0 | S01 |
| .....aaugacagaagauacCgaaag.....     | 1   | 1 | S02 |
| .....aCugacagaagauacugaaagcu.....   | 1   | 1 | S02 |
| .....augacagaagauacugaaagc.....     | 5   | 0 | S02 |
| .....augacagaagauacugaaagU.....     | 1   | 1 | S02 |
| .....augacagaagauacugaaagcC.....    | 1   | 1 | S02 |
| .....augacagaagauacugaaagcu.....    | 2   | 0 | S02 |
| .....augacagaagauacCaaagcu.....     | 1   | 1 | S02 |
| .....augacCgaagauacugaaagcu.....    | 1   | 1 | S02 |
| .....ugacagaagauacugaaU.....        | 3   | 1 | S02 |
| .....ugacaUaagauacugaaa.....        | 1   | 1 | S02 |
| .....ugacagaagauacugaaa.....        | 11  | 0 | S02 |
| .....ugacagaaaAuacugaaag.....       | 1   | 1 | S02 |
| .....ugacagaagauacugaGag.....       | 1   | 1 | S02 |
| .....ugacagaGgauacugaaag.....       | 1   | 1 | S02 |
| .....ugacagaagauacGgaaag.....       | 1   | 1 | S02 |
| .....ugacagaagauacugaaag.....       | 44  | 0 | S02 |
| .....ugacagaagauacugaaaA.....       | 1   | 1 | S02 |
| .....ugacagaagauacugaaaU.....       | 6   | 1 | S02 |
| .....ugacagaagauacugaaGgc.....      | 1   | 1 | S02 |
| .....ugacagaagauacugaaagG.....      | 2   | 1 | S02 |
| .....ugacagaagauacugGaaagc.....     | 1   | 1 | S02 |
| .....ugacagaagauacugaGagc.....      | 1   | 1 | S02 |
| .....ugacagaagGuacugaaagc.....      | 2   | 1 | S02 |
| .....ugacagUagauacugaaagc.....      | 1   | 1 | S02 |
| .....ugacagaagauacuCaaagc.....      | 1   | 1 | S02 |
| .....ugacagGagauacugaaagc.....      | 2   | 1 | S02 |
| .....ugacagaagauacugaaaUc.....      | 4   | 1 | S02 |
| .....Ngacagaagauacugaaagc.....      | 1   | 1 | S02 |
| .....ugacagaagauacugaaagc.....      | 256 | 0 | S02 |
| .....ugaAagaagauacugaaagc.....      | 1   | 1 | S02 |
| .....ugacagaCgauacugaaagc.....      | 1   | 1 | S02 |
| .....ugacagaagauacugaaagA.....      | 7   | 1 | S02 |
| .....ugacagaagauacCgaaagc.....      | 1   | 1 | S02 |

## Mature

## Star

|                                  |                                  |                                   |                                  |                                  |
|----------------------------------|----------------------------------|-----------------------------------|----------------------------------|----------------------------------|
| aaaugucugagauuuuguuaa            | ugacagaagauacugaaagcu            | aaauuauuauugaucauaug              | cguucaguuucugucugauu             | aaugaaauucuaagacaaauaucguuga     |
| .....uAacagaagauacugaaagc.....   | .....ugacagaagauacugaaagU.....   | .....ugacGgaagauacugaaagc.....    | .....ugacagaagauacugUaagc.....   | .....ugacagaagauGcugaaagc.....   |
| .....ugacagaagauacCgaaagcu.....  | .....ugacagaGgauacugaaagcu.....  | .....ugacagaaCauacugaaagcu.....   | .....ugacagaagauacAgaagcu.....   | .....ugacagaagauacuUaaagcu.....  |
| .....ugacagaagauacugaaCgcu.....  | .....ugaGagaagauacugaaagcu.....  | .....ugacagaagauCcugaaagcu.....   | .....ugacagaagauUcugaaagcu.....  | .....ugacagaagCuacugaaagcu.....  |
| .....ugacagGgaauacugaaagcu.....  | .....ugacagaagaGacugaaagcu.....  | .....ugacagaagauacugaaagcC.....   | .....ugacagaUauacugaaagcu.....   | .....ugacagaagauacugaaaAcu.....  |
| .....ugacagaagauacugaaagGu.....  | .....Agacagaagauacugaaagcu.....  | .....ugacCgaagauacugaaagcu.....   | .....ugacagaagauacugaGagcu.....  | .....ugacagaagauacugaCagcu.....  |
| .....ugacUgaagauacugaaagcu.....  | .....ugacagaagauacugCaagcu.....  | .....uCaagaagauacugaaagcu.....    | .....Ggacagaagauacugaaagcu.....  | .....ugacagUagauacugaaagcu.....  |
| .....ugacaCaagauacugaaagcu.....  | .....ugacagaagauacugaaagUu.....  | .....ugacagaaAauacugaaagcu.....   | .....uUacagaagauacugaaagcu.....  | .....Ngacagaagauacugaaagcu.....  |
| .....ugacagaagauacugaaagAu.....  | .....ugCcagaagauacugaaagcu.....  | .....ugacagaagaCacugaaagcu.....   | .....ugacagaagauacugaaaUcu.....  | .....ugacagaUgauacugaaagcu.....  |
| .....ugacaUaagauacugaaagcu.....  | .....ugacagaagauacugUaagcu.....  | .....ugacaAaagauacugaaagcu.....   | .....ugacagaagauaGugaaagcu.....  | .....ugacagaagauacuAaaagcu.....  |
| .....ugacagaagauacugaaGgcu.....  | .....ugacagaagauaAugaaagcu.....  | .....ugacagaagUuacugaaagcu.....   | .....ugaUagaagauacugaaagcu.....  | .....ugacagaagauacugaaagcA.....  |
| .....uAacagaagauacugaaagcu.....  | .....ugacagaagauacugaaagcG.....  | .....Cgacagaagauacugaaagcu.....   | .....ugaAgaagauacugaaagcu.....   | .....ugacagaagauGcugaaagcu.....  |
| .....ugGcagaagauacugaaagcu.....  | .....ugacagaagauacugGaaagcu..... | .....ugacagaagauacGgaaagcu.....   | .....ugGcagaagauacugaaagcu.....  | .....ugacagaagauacugGaaagcu..... |
| .....ugacagaagGuacugaaagcu.....  | .....ugacagaagauacugaaagcu.....  | .....ugUcagaagauacugaaagcu.....   | .....ugacagaagauacugaaUgcu.....  | .....ugacGgaagauacugaaagcu.....  |
| .....ugacagaagauacugaaagUua..... | .....ugacagaagauacugaaagcuG..... | .....ugacagaagauacugaaagcuua..... | .....ugacagaagauacugaaagcuU..... |                                  |

## Mature

## Star

aaaugucuagauuuuguuaaugacagaagauacugaaagcuaauuuuuuuuuugaucauaugcguucaguuuucucugucauuuaaugaauucuaagacaaauaucguuga

|                                     |    |   |     |
|-------------------------------------|----|---|-----|
| .....ugacagaagauacugaaagcuC.....    | 9  | 1 | S02 |
| .....ugacagaagauacugaaagcuUa.....   | 1  | 1 | S02 |
| .....ugacagaagauacugaaagcuU.....    | 1  | 1 | S02 |
| .....ugacagaagauacugaaagcuaaG.....  | 1  | 1 | S02 |
| .....ugacagaagauacugaaagcuauu.....  | 4  | 0 | S02 |
| .....ugacagaagauacugaaagcuUuu.....  | 1  | 1 | S02 |
| .....ugacagaagauacugaaagcuauuu..... | 1  | 0 | S02 |
| .....augcAuucaguuuucucuguc.....     | 1  | 1 | S02 |
| .....augcguucaguuuucucugucau.....   | 1  | 0 | S02 |
| .....augcguucaguuuucucugucauu.....  | 6  | 0 | S02 |
| .....augcAuucaguuuucucugucauu.....  | 1  | 1 | S02 |
| .....cguucaguuuucucuguc.....        | 9  | 0 | S02 |
| .....cAuucaguuuucucuguc.....        | 2  | 1 | S02 |
| .....cguucaguuuucucuguU.....        | 2  | 1 | S02 |
| .....cguucaguuuucugugucauu.....     | 1  | 1 | S02 |
| .....cguucGguuuuucucugucauu.....    | 1  | 1 | S02 |
| .....cguucaguuuucucugucauu.....     | 70 | 0 | S02 |
| .....cguucaguuuucucugucaGu.....     | 1  | 1 | S02 |
| .....cguucaguuuucucugucauC.....     | 7  | 1 | S02 |
| .....cguGcaguuuucucugucauu.....     | 1  | 1 | S02 |
| .....cCuucaguuuucucugucauu.....     | 1  | 1 | S02 |
| .....cguucaguuuucucugucauG.....     | 2  | 1 | S02 |
| .....cguucagAuuuucucugucauu.....    | 2  | 1 | S02 |
| .....cAuucaguuuucucugucauu.....     | 37 | 1 | S02 |
| .....Auucaguuuucucugucauu.....      | 4  | 1 | S02 |
| .....Auucaguuuucucugucauuu.....     | 1  | 1 | S02 |
| .....uucaguuuucucugucauuuA.....     | 1  | 1 | S02 |
| .....uucaguuuucucugucauuuu.....     | 1  | 0 | S02 |
| .....uucaguuuucucugucauuuuuU.....   | 1  | 1 | S02 |
| .....ucaguuuucucugucauu.....        | 1  | 0 | S02 |
| .....augaauuucuaagacaaauauc.....    | 1  | 0 | S02 |

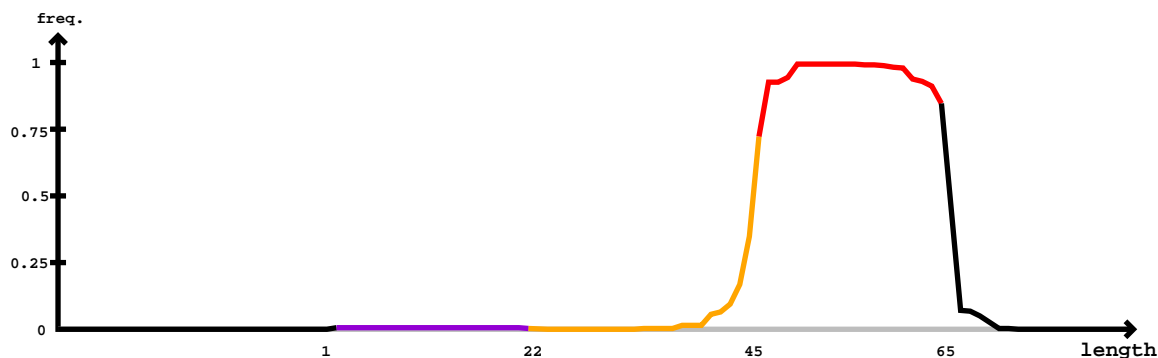

## Mature

[illegible]

## Star

## Mature

|                                |      |          |         |        |           |       |         |        |         |         |        |    |       |        |          |
|--------------------------------|------|----------|---------|--------|-----------|-------|---------|--------|---------|---------|--------|----|-------|--------|----------|
| uguuuauugguuucuaagaguauuuuacua | cagc | uuugccuu | aaauca  | uaaaca | cauca     | aagau | ugguuau | uguuuu | augauuu | aaaggcu | aaagcu | ua | aguaa | uuauca | aaagagaa |
| .....                          | uu   | augauuu  | aaaggcu | aaagcu | G         | ..... | 14      | 1      | S02     |         |        |    |       |        |          |
| .....                          | uu   | augauuu  | aaaggcu | aaagcu | Uu        | ..... | 1       | 1      | S02     |         |        |    |       |        |          |
| .....                          | u    | augauuu  | aaaggcu | aaagcu | Cu        | ..... | 1       | 1      | S02     |         |        |    |       |        |          |
| .....                          | u    | augauuu  | aaaggcu | aaagcu | Gu        | ..... | 44      | 1      | S02     |         |        |    |       |        |          |
| .....                          | u    | augauuu  | aaaggcu | aaagcu | au        | ..... | 1       | 0      | S02     |         |        |    |       |        |          |
| .....                          | a    | ugauuu   | aaaggcu | aaagcu | Gu        | ..... | 63      | 1      | S02     |         |        |    |       |        |          |
| .....                          | a    | ugauuu   | aaaggcu | aaagcu | Gua       | ..... | 15      | 1      | S02     |         |        |    |       |        |          |
| .....                          | u    | gauuuu   | aaaggcu | aaagcu | Gu        | ..... | 41      | 1      | S02     |         |        |    |       |        |          |
| .....                          | u    | gauuuu   | aaaggcu | aaagcu | Cua       | ..... | 1       | 1      | S02     |         |        |    |       |        |          |
| .....                          | u    | gauuuu   | aaaggcu | aaagcu | Guag      | ..... | 1       | 1      | S02     |         |        |    |       |        |          |
| .....                          | a    | uuuu     | aaaggcu | aaagcu | Guagu     | ..... | 5       | 1      | S02     |         |        |    |       |        |          |
| .....                          | a    | uuuu     | aaaggcu | aaagcu | Guagua    | ..... | 1       | 1      | S02     |         |        |    |       |        |          |
| .....                          | u    | uuu      | aaaggcu | aaagcu | Guagu     | ..... | 1       | 1      | S02     |         |        |    |       |        |          |
| .....                          | u    | uuu      | aaaggcu | aaagcu | Guagua    | ..... | 5       | 1      | S02     |         |        |    |       |        |          |
| .....                          | u    | uuu      | aaaggcu | aaagcu | Guaguaa   | ..... | 5       | 1      | S02     |         |        |    |       |        |          |
| .....                          | u    | uuu      | aaaggcu | aaagcu | Guaguaauu | ..... | 1       | 1      | S02     |         |        |    |       |        |          |



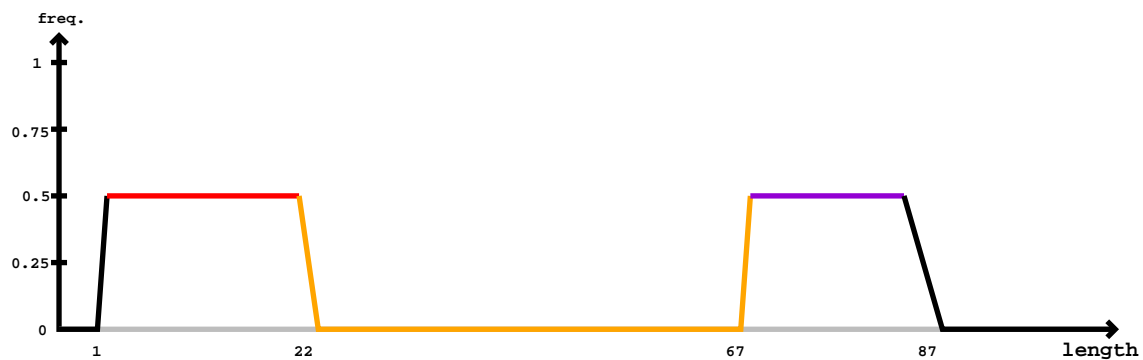

Star

[illegible]

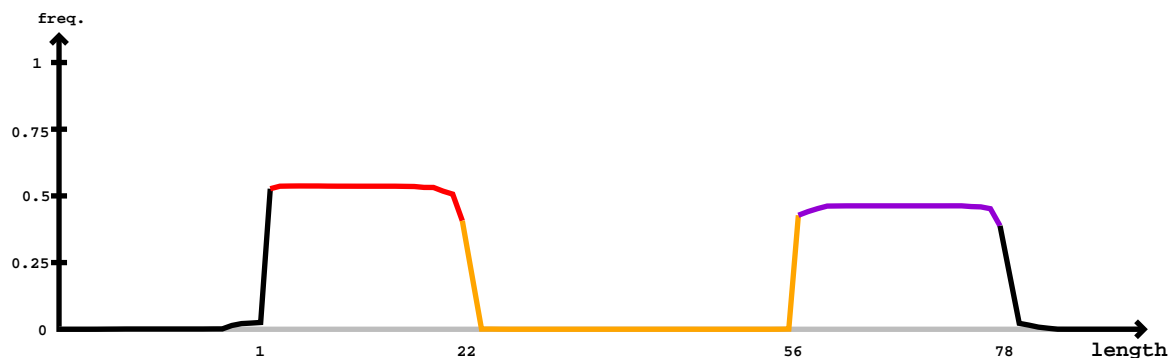

Star

| 5' -                                                                                                                    | 3'    | obs |        |
|-------------------------------------------------------------------------------------------------------------------------|-------|-----|--------|
|                                                                                                                         |       | exp |        |
| ggauuuuggggaagguuuuggugugugggugguuaggggaagauaacuaacuaguuugaauauguuaaggguuuuguuuaucuuucccuacuccacccaugcccauaguuuuucccauc |       |     |        |
| ggauuuuggggaagguuuuggugugugggugguuaggggaagauaacuaacuaguuugaauauguuaaggguuuuguuuaucuuucccuacuccacccaugcccauaguuuuucccauc |       |     |        |
| .....(((((((.(.(((((((((((((((.(((((((((((((((.(((((.(((((.(.....)))))).).)).)).)))))))))).).)))))))).).).))))))..      | reads | mm  | sample |
| .auuuuggggaagguuuuggugugug.....                                                                                         | 1     | 1   | S01    |
| ..uuuuuggggaagguuuugguguguggg.....                                                                                      | 1     | 0   | S01    |
| ..uuuuuggggaagguuuugguguggggu.....                                                                                      | 1     | 0   | S01    |
| ...uuuggggaagguuuuggugugggA.....                                                                                        | 1     | 1   | S01    |
| ..uuuggggaagguuuugguguguggg.....                                                                                        | 1     | 0   | S01    |
| ...uuggggaagguuuugguguguggg.....                                                                                        | 1     | 0   | S01    |
| ...uuggggaagguuuugguguggggu.....                                                                                        | 1     | 0   | S01    |
| .....uuuuggguguggggugggguuagg.....                                                                                      | 1     | 0   | S01    |
| .....uuuuggguguggggugguuaggggaA.....                                                                                    | 1     | 0   | S01    |
| .....uuuuggguguggggugguuaggggaag.....                                                                                   | 1     | 0   | S01    |
| .....uuggguguggggugguuagg.....                                                                                          | 3     | 0   | S01    |
| .....uuggguguggggugguuagggg.....                                                                                        | 2     | 0   | S01    |
| .....uuggguguggggugguuagggga.....                                                                                       | 5     | 0   | S01    |
| .....uuggguguggggCggguuagggga.....                                                                                      | 1     | 1   | S01    |
| .....uuggguguggggugguuaggggaag.....                                                                                     | 13    | 0   | S01    |
| .....uugggGuggggugguuaggggaag.....                                                                                      | 1     | 1   | S01    |
| .....uugggugugAgugggguuaggggaaga.....                                                                                   | 1     | 1   | S01    |
| .....uuggguguggggugguuaggggaaga.....                                                                                    | 34    | 0   | S01    |
| .....uuggguguggggugguuaggggaagG.....                                                                                    | 1     | 1   | S01    |
| .....uuUguguggggugguuaggggaaga.....                                                                                     | 1     | 1   | S01    |
| .....uuggguguggggugguuagggCaaga.....                                                                                    | 1     | 1   | S01    |
| .....uuggguguggggugguuaggggaagU.....                                                                                    | 1     | 1   | S01    |
| .....uuggguguggggugguuaggggaaga.....                                                                                    | 1     | 1   | S01    |
| .....uuggguguggggugguuaggggaagaC.....                                                                                   | 3     | 1   | S01    |
| .....uugggugugggAugguuaggggaagau.....                                                                                   | 1     | 1   | S01    |
| .....uuggGguggggugguuaggggaagau.....                                                                                    | 1     | 1   | S01    |
| .....uuggguguggggugguuaggggaagau.....                                                                                   | 15    | 0   | S01    |
| .....uCggguguggggugguuaggggaagau.....                                                                                   | 1     | 1   | S01    |
| .....uuggguguggggugguuaggggaagauU.....                                                                                  | 7     | 1   | S01    |
| .....uuggguguggggugguuaggggaagaua.....                                                                                  | 3     | 0   | S01    |
| .....uuggguguggggugguuagggga.....                                                                                       | 4     | 0   | S01    |
| .....uuggguguggggugguuaggggaA.....                                                                                      | 1     | 1   | S01    |
| .....uuggguguggggugguuaggggaag.....                                                                                     | 13    | 0   | S01    |

## Mature

## Star

|                                                                                                                        |      |   |     |
|------------------------------------------------------------------------------------------------------------------------|------|---|-----|
| ggauuuugggaagguuuuggguguggguggguuaggggaagauaacuaacuaguuugaauauguuuaggguuuuguuuauucuucccuacuccaccccaugcccauaguuuucccauc |      |   |     |
| .....ugguguggguggguuaggggaaga.....                                                                                     | 4    | 0 | S01 |
| .....ugguguggguggguuaggggaagau.....                                                                                    | 1    | 0 | S01 |
| .....ggGguggguggguuagggga.....                                                                                         | 1    | 1 | S01 |
| .....gguguggguggguuagggga.....                                                                                         | 4    | 0 | S01 |
| .....gguguggguggguuaggggaag.....                                                                                       | 1    | 0 | S01 |
| .....gguguggguggguuaggggaaga.....                                                                                      | 1    | 0 | S01 |
| .....gguguggguggguuaggggaagau.....                                                                                     | 1    | 0 | S01 |
| .....gguguggguggguuaggggaagaua.....                                                                                    | 2    | 0 | S01 |
| .....gguguggguggguuaggggaagauU.....                                                                                    | 1    | 1 | S01 |
| .....guguggguggguuaggaag.....                                                                                          | 1    | 1 | S01 |
| .....guguggguggguuaggggaaga.....                                                                                       | 1    | 0 | S01 |
| .....guguggguggguuaggggaagaC.....                                                                                      | 1    | 1 | S01 |
| .....guguggguggguuaggggaagau.....                                                                                      | 6    | 0 | S01 |
| .....Cuuggguggguuaggggaagaua.....                                                                                      | 1    | 1 | S01 |
| .....uguggguggguuaggggaGg.....                                                                                         | 1    | 1 | S01 |
| .....uguggguggguuagggUaag.....                                                                                         | 1    | 1 | S01 |
| .....uguggguggguuaggggaag.....                                                                                         | 36   | 0 | S01 |
| .....uguggguggguuaggggaA.....                                                                                          | 2    | 1 | S01 |
| .....uguggguggguuaggggaU.....                                                                                          | 1    | 1 | S01 |
| .....ugnuUgguggguuaggggaag.....                                                                                        | 1    | 1 | S01 |
| .....ugugggguAguuaggggaag.....                                                                                         | 1    | 1 | S01 |
| .....ugugAguggguuaggggaag.....                                                                                         | 1    | 1 | S01 |
| .....uguggguggguuaggggaagC.....                                                                                        | 1    | 1 | S01 |
| .....uguggguggguuaggggaaga.....                                                                                        | 19   | 0 | S01 |
| .....ugugggGgguuaggggaaga.....                                                                                         | 1    | 1 | S01 |
| .....uguggguggguuaggggaagU.....                                                                                        | 1    | 1 | S01 |
| .....ugugggAggguuaggggaaga.....                                                                                        | 1    | 1 | S01 |
| .....ugnuAgguggguuaggggaaga.....                                                                                       | 1    | 1 | S01 |
| .....uguggguggguuGgggaaga.....                                                                                         | 1    | 1 | S01 |
| .....uguggguggguuCgggaagau.....                                                                                        | 1    | 1 | S01 |
| .....ugCgguggguuaggggaagau.....                                                                                        | 1    | 1 | S01 |
| .....ugugggGgguuaggggaagau.....                                                                                        | 2    | 1 | S01 |
| .....uguggguggguuCagggaagau.....                                                                                       | 2    | 1 | S01 |
| .....uguggguggguuGagggaagau.....                                                                                       | 1    | 1 | S01 |
| .....uguggguggguuUgggaagau.....                                                                                        | 2    | 1 | S01 |
| .....uguggguggguuaggggaUau.....                                                                                        | 1    | 1 | S01 |
| .....uguggguggguuaggggaagGu.....                                                                                       | 2    | 1 | S01 |
| .....uguggAuggguuaggggaagau.....                                                                                       | 1    | 1 | S01 |
| .....uguggguggguuaggggaagaA.....                                                                                       | 2    | 1 | S01 |
| .....ugugggugggCuagggaagau.....                                                                                        | 3    | 1 | S01 |
| .....ugGgguggguuaggggaagau.....                                                                                        | 2    | 1 | S01 |
| .....ugugggugggAuagggaagau.....                                                                                        | 2    | 1 | S01 |
| .....uguggguggguuaggggaagau.....                                                                                       | 480  | 0 | S01 |
| .....uguggguggguuaggggaagaC.....                                                                                       | 42   | 1 | S01 |
| .....uguggguggguuaggggaagaG.....                                                                                       | 5    | 1 | S01 |
| .....ugnuUgguggguuaggggaagau.....                                                                                      | 1    | 1 | S01 |
| .....ugugggAggguuaggggaagau.....                                                                                       | 2    | 1 | S01 |
| .....ugugggCgguuaggggaagau.....                                                                                        | 1    | 1 | S01 |
| .....uguggguggguuagggGagau.....                                                                                        | 2    | 1 | S01 |
| .....ugugggugggGuagggaagau.....                                                                                        | 3    | 1 | S01 |
| .....uguggguggguuaggggaagaua.....                                                                                      | 1895 | 0 | S01 |
| .....uguggguggguuaggggaAaua.....                                                                                       | 1    | 1 | S01 |
| .....uguggguggguuaggggaCgaua.....                                                                                      | 2    | 1 | S01 |
| .....ugugggCgguuaggggaagaua.....                                                                                       | 13   | 1 | S01 |
| .....uguggguggguuaggggaagauG.....                                                                                      | 15   | 1 | S01 |
| .....uguggAuggguuaggggaagaua.....                                                                                      | 1    | 1 | S01 |
| .....uguggguggguuCagggaagaua.....                                                                                      | 2    | 1 | S01 |
| .....uguggguggguuaggggaagaCa.....                                                                                      | 2    | 1 | S01 |
| .....ugugggguUguuaggggaagaua.....                                                                                      | 1    | 1 | S01 |
| .....ugugggGgguuaggggaagaua.....                                                                                       | 15   | 1 | S01 |
| .....ugugggugggAuagggaagaua.....                                                                                       | 4    | 1 | S01 |
| .....uguggguggguuagggaagaua.....                                                                                       | 3    | 1 | S01 |
| .....uguggguggguuAggggaagaua.....                                                                                      | 1    | 1 | S01 |
| .....ugugggAggguuaggggaagaua.....                                                                                      | 15   | 1 | S01 |
| .....ugugggugggCuagggaagaua.....                                                                                       | 2    | 1 | S01 |
| .....uguggguggguuagggGagaua.....                                                                                       | 7    | 1 | S01 |
| .....ugugggugAuagggaagaua.....                                                                                         | 2    | 1 | S01 |
| .....ugnuCgguggguuaggggaagaua.....                                                                                     | 1    | 1 | S01 |
| .....Cguuggguggguuaggggaagaua.....                                                                                     | 4    | 1 | S01 |
| .....ugCgguggguuaggggaagaua.....                                                                                       | 3    | 1 | S01 |

## Mature

## Star

|                                             |                                      |                                     |     |   |     |
|---------------------------------------------|--------------------------------------|-------------------------------------|-----|---|-----|
| ggauuuugggaagguuuugguguggguggguuaggggaagaua | acuaacuaguuugaauauguuuaggguuuuguuuau | cuuuccuacuccacccaugccauaguuuucccauc |     |   |     |
| .....ugugguggguuuacGggaagaua.....           |                                      |                                     | 1   | 1 | S01 |
| .....ugugguggguuaggggaGgaua.....            |                                      |                                     | 9   | 1 | S01 |
| .....ugugguggguuuAaggaagaua.....            |                                      |                                     | 2   | 1 | S01 |
| .....uguggguAguuaggggaagaua.....            |                                      |                                     | 1   | 1 | S01 |
| .....ugugguggguuaggggaagauC.....            |                                      |                                     | 73  | 1 | S01 |
| .....ugugguggguuUgggaagaua.....             |                                      |                                     | 1   | 1 | S01 |
| .....uguggugugUuuaggggaagaua.....           |                                      |                                     | 1   | 1 | S01 |
| .....uUugguggguuaggggaagaua.....            |                                      |                                     | 2   | 1 | S01 |
| .....ugAggguggguuaggggaagaua.....           |                                      |                                     | 5   | 1 | S01 |
| .....ugugguggguuGgggaagaua.....             |                                      |                                     | 6   | 1 | S01 |
| .....ugugguggguuCgggaagaua.....             |                                      |                                     | 2   | 1 | S01 |
| .....ugugguggguuaggUaagaua.....             |                                      |                                     | 3   | 1 | S01 |
| .....Ggugguggguuaggggaagaua.....            |                                      |                                     | 1   | 1 | S01 |
| .....ugugguggguuaggCaagaua.....             |                                      |                                     | 2   | 1 | S01 |
| .....ugugguggguuaggggaagUua.....            |                                      |                                     | 2   | 1 | S01 |
| .....ugugguggguuaggggaagaAa.....            |                                      |                                     | 1   | 1 | S01 |
| .....ugnuUgguggguuaggggaagaua.....          |                                      |                                     | 9   | 1 | S01 |
| .....ugugguggguuaggggaagGua.....            |                                      |                                     | 10  | 1 | S01 |
| .....Agugguggguuaggggaagaua.....            |                                      |                                     | 2   | 1 | S01 |
| .....ugnuAgguggguuaggggaagaua.....          |                                      |                                     | 4   | 1 | S01 |
| .....ugugguggguuaggggaagauU.....            |                                      |                                     | 125 | 1 | S01 |
| .....uguggCugguuaggggaagaua.....            |                                      |                                     | 1   | 1 | S01 |
| .....Nguugguggguuaggggaagaua.....           |                                      |                                     | 2   | 1 | S01 |
| .....ugugAgugguuaggggaagaua.....            |                                      |                                     | 2   | 1 | S01 |
| .....uAugguggguuaggggaagaua.....            |                                      |                                     | 1   | 1 | S01 |
| .....uguggugggGuaggggaagaua.....            |                                      |                                     | 8   | 1 | S01 |
| .....ugugguggguuaggggCagaua.....            |                                      |                                     | 2   | 1 | S01 |
| .....ugugguggguuaggggaagauaG.....           |                                      |                                     | 2   | 1 | S01 |
| .....ugugguggguuaggggaagauaa.....           |                                      |                                     | 1   | 0 | S01 |
| .....ugugguggguuaggggaagauaC.....           |                                      |                                     | 2   | 1 | S01 |
| .....ugugguggguuaggggaagauaU.....           |                                      |                                     | 2   | 1 | S01 |
| .....ugugguggguuaggggaagauaGcu.....         |                                      |                                     | 1   | 1 | S01 |
| .....ugugguggguuaggggaagauaacu.....         |                                      |                                     | 1   | 0 | S01 |
| .....ugugguggguuaggggaagauaCcua.....        |                                      |                                     | 1   | 1 | S01 |
| .....gugguggguuaggggaCgau.....              |                                      |                                     | 1   | 1 | S01 |
| .....gugguggguuaggggaagGu.....              |                                      |                                     | 1   | 1 | S01 |
| .....gugguggguuaggggaagau.....              |                                      |                                     | 8   | 0 | S01 |
| .....gugguggguuuAaggaagau.....              |                                      |                                     | 1   | 1 | S01 |
| .....Auggguggguuaggggaagau.....             |                                      |                                     | 1   | 1 | S01 |
| .....gugguggguuCgggaagau.....               |                                      |                                     | 1   | 1 | S01 |
| .....gugguggguuaggggaagauC.....             |                                      |                                     | 1   | 1 | S01 |
| .....guggugGuuuaggggaagaua.....             |                                      |                                     | 1   | 1 | S01 |
| .....gugggGgguuaggggaagaua.....             |                                      |                                     | 1   | 1 | S01 |
| .....gugguggguuaggggaagCua.....             |                                      |                                     | 1   | 1 | S01 |
| .....guGAguggguuaggggaagaua.....            |                                      |                                     | 2   | 1 | S01 |
| .....gugguggguuaggggaagauU.....             |                                      |                                     | 7   | 1 | S01 |
| .....gugguggguuaggggaagaua.....             |                                      |                                     | 31  | 0 | S01 |
| .....uggguggguuaggggaagau.....              |                                      |                                     | 1   | 0 | S01 |
| .....uggguggguuGgggaagau.....               |                                      |                                     | 1   | 1 | S01 |
| .....uggguggguuaggggaagaua.....             |                                      |                                     | 1   | 0 | S01 |
| .....ggguggguuaggggaagaua.....              |                                      |                                     | 3   | 0 | S01 |
| .....aucuuccuacuccacccaugc.....             |                                      |                                     | 2   | 0 | S01 |
| .....aucuuccuacuccaaccaugA.....             |                                      |                                     | 1   | 1 | S01 |
| .....ucuuccuacuccacccU.....                 |                                      |                                     | 1   | 1 | S01 |
| .....ucuuccuacuccaccca.....                 |                                      |                                     | 13  | 0 | S01 |
| .....ucuuccuacuccaaccC.....                 |                                      |                                     | 1   | 1 | S01 |
| .....ucuuccuacuccacccaU.....                |                                      |                                     | 7   | 0 | S01 |
| .....ucuuccuacuccacccUu.....                |                                      |                                     | 1   | 1 | S01 |
| .....ucuuccuacuccaaccaug.....               |                                      |                                     | 33  | 0 | S01 |
| .....ucuGccuacuccacccaug.....               |                                      |                                     | 1   | 1 | S01 |
| .....ucuuccuacuccacccaAg.....               |                                      |                                     | 1   | 1 | S01 |
| .....ucuuccuacuccaaccuA.....                |                                      |                                     | 2   | 1 | S01 |
| .....ucuuccuacuccacGcaugc.....              |                                      |                                     | 1   | 1 | S01 |
| .....ucuuccuacuccacccaugU.....              |                                      |                                     | 54  | 1 | S01 |
| .....ucuucccAacuccaaccaugc.....             |                                      |                                     | 1   | 1 | S01 |
| .....ucCuccuacuccacccaugc.....              |                                      |                                     | 1   | 1 | S01 |
| .....Acuuccuacuccacccaugc.....              |                                      |                                     | 1   | 1 | S01 |
| .....ucuuccuacuccacccaGgc.....              |                                      |                                     | 1   | 1 | S01 |
| .....ucuuccuacCccacccaugc.....              |                                      |                                     | 3   | 1 | S01 |
| .....Ccuuccuacuccacccaugc.....              |                                      |                                     | 1   | 1 | S01 |

## Mature

## Star

ggauuuugggaagguuuugguguggguggguuaggggaagauaacuaacuaguuugaauauguuuagguuuuuguuuauucuucccuacuccacccaugccaaguuuucccauc

|                                   |      |   |     |
|-----------------------------------|------|---|-----|
| .....ucuuUcuacuccacccaugc.....    | 1    | 1 | S01 |
| .....ucuucccuacuccacccaugA.....   | 19   | 1 | S01 |
| .....ucuucccuAuccacccaugc.....    | 1    | 1 | S01 |
| .....ucuucccuacuccacccaUAc.....   | 1    | 1 | S01 |
| .....ucuucccuacuccaccUaugc.....   | 1    | 1 | S01 |
| .....ucuucccuGuccacccaugc.....    | 1    | 1 | S01 |
| .....ucuucccCacuccacccaugc.....   | 1    | 1 | S01 |
| .....ucuucccuacuccaccGaugc.....   | 1    | 1 | S01 |
| .....ucuucccuacuccaGccaugc.....   | 1    | 1 | S01 |
| .....ucuAcccuacuccacccaugc.....   | 1    | 1 | S01 |
| .....ucuucccuacuccacAcaugc.....   | 2    | 1 | S01 |
| .....ucuGcccuacuccacccaugc.....   | 1    | 1 | S01 |
| .....uGuucccuacuccacccaugc.....   | 1    | 1 | S01 |
| .....ucuucccuacuccacccaugc.....   | 323  | 0 | S01 |
| .....ucuucccuacuGacccaugc.....    | 1    | 1 | S01 |
| .....ucuuccAaacuccacccaugc.....   | 1    | 1 | S01 |
| .....ucuuAcccuacuccacccaugc.....  | 1    | 1 | S01 |
| .....ucuucccuacuccacccaUc.....    | 1    | 1 | S01 |
| .....ucuCcccuacuccacccaugc.....   | 1    | 1 | S01 |
| .....ucuucccuacuccGcccaugc.....   | 2    | 1 | S01 |
| .....ucuucccuacuUacccaugc.....    | 1    | 1 | S01 |
| .....uUuucccuacuccacccaugc.....   | 1    | 1 | S01 |
| .....ucGucccuacuccacccaugc.....   | 1    | 1 | S01 |
| .....ucuucccuacuccCcccaugc.....   | 2    | 1 | S01 |
| .....Guucccuacuccacccaugcc.....   | 1    | 1 | S01 |
| .....Ncuucccuacuccacccaugcc.....  | 2    | 1 | S01 |
| .....ucuCcccuacuccacccaugcc.....  | 4    | 1 | S01 |
| .....ucuucccuacucUacccaugcc.....  | 2    | 1 | S01 |
| .....ucCucccuacuccacccaugcc.....  | 5    | 1 | S01 |
| .....ucuucccuacuGacccaugcc.....   | 1    | 1 | S01 |
| .....ucuucccuAuccacccaugcc.....   | 3    | 1 | S01 |
| .....ucuucccuacuccacccaUcc.....   | 2    | 1 | S01 |
| .....ucuuAcuacuccacccaugcc.....   | 2    | 1 | S01 |
| .....ucuucccuacuccacccaUAcc.....  | 3    | 1 | S01 |
| .....ucuucccuacuccacccaugUc.....  | 5    | 1 | S01 |
| .....Acuucccuacuccacccaugcc.....  | 1    | 1 | S01 |
| .....ucuucccuacuAcacccaugcc.....  | 1    | 1 | S01 |
| .....ucuucccuacuccCcccaugcc.....  | 5    | 1 | S01 |
| .....ucuAcccuacuccacccaugcc.....  | 3    | 1 | S01 |
| .....ucuucccuacuccacccaugcU.....  | 446  | 1 | S01 |
| .....ucuucccuacuccUcccaugcc.....  | 1    | 1 | S01 |
| .....ucuuUccuacuccacccaugcc.....  | 1    | 1 | S01 |
| .....ucuucccuacuccacccaugcA.....  | 123  | 1 | S01 |
| .....ucuucccuacuUcaaccaugcc.....  | 7    | 1 | S01 |
| .....uAuucccuacuccacccaugcc.....  | 1    | 1 | S01 |
| .....ucuucccuGcuccacccaugcc.....  | 4    | 1 | S01 |
| .....ucuucccuacuccaaccAaugcc..... | 3    | 1 | S01 |
| .....ucuucccuacuccaUccaugcc.....  | 3    | 1 | S01 |
| .....Ccuucccuacuccacccaugcc.....  | 3    | 1 | S01 |
| .....ucuucccuacuccaaccUugcc.....  | 2    | 1 | S01 |
| .....ucuuccGuacuccacccaugcc.....  | 1    | 1 | S01 |
| .....ucuucccuGuccacccaugcc.....   | 3    | 1 | S01 |
| .....ucuucccuacAccaaccaugcc.....  | 1    | 1 | S01 |
| .....ucuucccuacuccacccaugcc.....  | 1417 | 0 | S01 |
| .....ucuucccuacuccaccccGugcc..... | 1    | 1 | S01 |
| .....ucuucccuacuccaaccaugAc.....  | 6    | 1 | S01 |
| .....ucuucccuacuccGcccaugcc.....  | 2    | 1 | S01 |
| .....ucuucccuacuccacAcaugcc.....  | 2    | 1 | S01 |
| .....ucuucccuacuccaaccCGcc.....   | 2    | 1 | S01 |
| .....uUuucccuacuccacccaugcc.....  | 2    | 1 | S01 |
| .....ucuucccuacuccaccGaugcc.....  | 1    | 1 | S01 |
| .....ucuGcccuacuccaaccaugcc.....  | 3    | 1 | S01 |
| .....ucuucccuacuccaAccaugcc.....  | 1    | 1 | S01 |
| .....ucuucccuacuccaccUaugcc.....  | 1    | 1 | S01 |
| .....ucAucccuacuccacccaugcc.....  | 1    | 1 | S01 |
| .....ucuucccuUuccacccaugcc.....   | 4    | 1 | S01 |
| .....ucuuUcUaacuccacccaugcc.....  | 1    | 1 | S01 |
| .....ucuucccGacuccacccaugcc.....  | 2    | 1 | S01 |
| .....ucuuGcuacuccacccaugcc.....   | 1    | 1 | S01 |
| .....ucuuAccuacuccacccaugcc.....  | 3    | 1 | S01 |

**Mature**

Star

ggauuuugggaagguuuuggugugggugguuaggaagauaacuaacuaguuugaauauguuaagguuuuguuuaucuuuccuacuccaccaugccauaguuuuuccauc

|                                      |    |   |     |
|--------------------------------------|----|---|-----|
| .....ucuucccuacuccacccaugcG.....     | 12 | 1 | S01 |
| .....ucuuccAuaucuccacccaugcc.....    | 2  | 1 | S01 |
| .....ucuucccAacuccacccaugcc.....     | 2  | 1 | S01 |
| .....ucuucccuCcuccacccaugcc.....     | 1  | 1 | S01 |
| .....ucuucccuacuccacccaAgcc.....     | 5  | 1 | S01 |
| .....ucuucccuacuccacccaGgcc.....     | 2  | 1 | S01 |
| .....ucuucccuacucAacccaugcc.....     | 1  | 1 | S01 |
| .....ucuucccuacuccacUcaugcc.....     | 2  | 1 | S01 |
| .....ucuucccuacCccacccaugcc.....     | 6  | 1 | S01 |
| .....ucuucccuacuccacccaugGc.....     | 1  | 1 | S01 |
| .....ucuucccCacuccacccaugcc.....     | 2  | 1 | S01 |
| .....ucuucccuacuccacccaugcca.....    | 2  | 0 | S01 |
| .....ucuucccuacuccacAcaugcca.....    | 1  | 1 | S01 |
| .....ucuucccuacuccacccaugccU.....    | 5  | 1 | S01 |
| .....ucuucccuacuccacccaugccC.....    | 2  | 1 | S01 |
| .....ucuucccuacuccacccaugccG.....    | 1  | 1 | S01 |
| .....ucuucccuacuccacccaugccau.....   | 2  | 0 | S01 |
| .....ucuucccuacuccacccaugccUu.....   | 2  | 1 | S01 |
| .....ucuucccuacCccacccaugccau.....   | 1  | 1 | S01 |
| .....ucuuccGuaucuccacccaugccaua..... | 1  | 1 | S01 |
| .....ucuucccuacuccacccaugccauC.....  | 1  | 1 | S01 |
| .....cuucccuacuccacccaau.....        | 1  | 0 | S01 |
| .....cuucccuacuccacccaug.....        | 2  | 0 | S01 |
| .....cuucccuacuccacccaauU.....       | 1  | 1 | S01 |
| .....cuucccuacuccacccaauA.....       | 1  | 1 | S01 |
| .....cuucccuacuccacccaugc.....       | 4  | 0 | S01 |
| .....cuucccuacuccacccaugU.....       | 1  | 1 | S01 |
| .....cuucccuacuccacccaugG.....       | 1  | 1 | S01 |
| .....cuucccuacuccacccaugcc.....      | 16 | 0 | S01 |
| .....cuucccuacuccacccaugcA.....      | 2  | 1 | S01 |
| .....cuucccuacuccacccaugcU.....      | 7  | 1 | S01 |
| .....cuucccuacuccaUcaugcc.....       | 1  | 1 | S01 |
| .....cuucccuacuccacccaugcG.....      | 1  | 1 | S01 |
| .....cuuGccuacuccacccaugcca.....     | 1  | 1 | S01 |
| .....cuucccuacuccacccaugcca.....     | 15 | 0 | S01 |
| .....cuucccuacuccacccaugccG.....     | 1  | 1 | S01 |
| .....cuucccuacuccacccaugccaC.....    | 2  | 1 | S01 |
| .....cuucccuacuccacccaugccau.....    | 8  | 0 | S01 |
| .....cuucccuacuccacccaugccaua.....   | 4  | 0 | S01 |
| .....cuucccuacuccacccaugccauU.....   | 1  | 1 | S01 |
| .....cuucccuacuccacccaugUcaua.....   | 1  | 1 | S01 |
| .....cuucccuacuccacccaugccauaA.....  | 4  | 1 | S01 |
| .....cuucccuacGccacccaugccauag.....  | 1  | 1 | S01 |
| .....cuucccuacuccacccaugccauag.....  | 18 | 0 | S01 |
| .....cGucccuacuccacccaugccauag.....  | 1  | 1 | S01 |
| .....cuucccuacuccacccaugccauagu..... | 6  | 0 | S01 |
| .....cuucccuacuccacccaugccauagC..... | 1  | 1 | S01 |
| .....uucccuacuccacccaug.....         | 1  | 0 | S01 |
| .....uucccuacuccacccaugc.....        | 1  | 0 | S01 |
| .....uucccuacuccacccGugcc.....       | 1  | 1 | S01 |
| .....uucccuacuccacccaugcc.....       | 6  | 0 | S01 |
| .....uucccuacuccacccaugccG.....      | 1  | 1 | S01 |
| .....uucccuacuccacccaugccaC.....     | 1  | 1 | S01 |
| .....uucccuacuccacccGugccau.....     | 1  | 1 | S01 |
| .....uucccuacuccacccaugccau.....     | 12 | 0 | S01 |
| .....uucccuacuccacccaugccaua.....    | 11 | 0 | S01 |
| .....uucccuacuccacccaugccauag.....   | 13 | 0 | S01 |
| .....uucccuacuccacccaugccauagC.....  | 1  | 1 | S01 |
| .....uucccuacuccacccaugccauagG.....  | 1  | 1 | S01 |
| .....uucccuacuccacccaugccauagu.....  | 8  | 0 | S01 |
| .....ucccuacuccacccaugc.....         | 1  | 0 | S01 |
| .....ucccuacuccacccaugcc.....        | 9  | 0 | S01 |
| .....ucccuacuccacccaugcG.....        | 1  | 1 | S01 |
| .....ucccuacuccacccaugcU.....        | 1  | 1 | S01 |
| .....ucccuacuccacccaugcca.....       | 2  | 0 | S01 |
| .....ucccuacuccacccaugccUu.....      | 1  | 1 | S01 |
| .....ucccuacuccaUcaugccau.....       | 1  | 1 | S01 |
| .....ucccuacuccacccaugccau.....      | 3  | 0 | S01 |
| .....ucUcuacuccacccaugccaua.....     | 1  | 1 | S01 |
| .....uGccuacuccacccaugccaua.....     | 1  | 1 | S01 |

## Mature

Star

[illegible]

## Mature

## Star

|                                                                                                                      |      |   |     |
|----------------------------------------------------------------------------------------------------------------------|------|---|-----|
| ggauuuugggaagguuuugguguggggugguuaggggaagauaacuaacuaguuugaauauguuuagguuuuuguuuauucuucccuacuccaccccaugccauaguuuucccauc |      |   |     |
| .....ugugggugguuaCggaagau.....                                                                                       | 1    | 1 | S02 |
| .....uAugggugguuaggggaagau.....                                                                                      | 2    | 1 | S02 |
| .....uCuugggugguuaggggaagau.....                                                                                     | 1    | 1 | S02 |
| .....ugugggugguuAugggaagau.....                                                                                      | 1    | 1 | S02 |
| .....ugugggGggguuaggggaagau.....                                                                                     | 3    | 1 | S02 |
| .....ugugggugguuaggggaagAA.....                                                                                      | 2    | 1 | S02 |
| .....ugugggugguuagCgaagaua.....                                                                                      | 1    | 1 | S02 |
| .....ugugggugguuaggggaagaua.....                                                                                     | 1548 | 0 | S02 |
| .....ugugggAugguuaggggaagaua.....                                                                                    | 3    | 1 | S02 |
| .....ugugggugguCaggggaagaua.....                                                                                     | 5    | 1 | S02 |
| .....ugugggugguuAaggggaagaua.....                                                                                    | 2    | 1 | S02 |
| .....uguuAgguugguuaggggaagaua.....                                                                                   | 2    | 1 | S02 |
| .....ugCgggugguuaggggaagaua.....                                                                                     | 5    | 1 | S02 |
| .....ugugggugguuaggggaagauC.....                                                                                     | 104  | 1 | S02 |
| .....Ngugggugguuaggggaagaua.....                                                                                     | 1    | 1 | S02 |
| .....ugugggugguuagggAaagaua.....                                                                                     | 2    | 1 | S02 |
| .....ugugggugAuuaggggaagaua.....                                                                                     | 1    | 1 | S02 |
| .....ugugggugguuaggggaagGua.....                                                                                     | 5    | 1 | S02 |
| .....ugugggugguuaAgggaagaua.....                                                                                     | 3    | 1 | S02 |
| .....ugugggugguuGgggaagaua.....                                                                                      | 4    | 1 | S02 |
| .....ugugggCggguuaggggaagaua.....                                                                                    | 6    | 1 | S02 |
| .....ugugUgugguuaggggaagaua.....                                                                                     | 1    | 1 | S02 |
| .....ugugggugguuaggggaagauU.....                                                                                     | 91   | 1 | S02 |
| .....uguCggugguuaggggaagaua.....                                                                                     | 1    | 1 | S02 |
| .....ugugggAgguuaggggaagaua.....                                                                                     | 8    | 1 | S02 |
| .....uguuGggugguuaggggaagaua.....                                                                                    | 14   | 1 | S02 |
| .....Cgugggugguuaggggaagaua.....                                                                                     | 4    | 1 | S02 |
| .....ugugggugguCuaggggaagaua.....                                                                                    | 5    | 1 | S02 |
| .....ugugggugguuaggggaAAuaa.....                                                                                     | 1    | 1 | S02 |
| .....ugugggugguuaggggUagaua.....                                                                                     | 3    | 1 | S02 |
| .....ugugggugguuaggggaCaua.....                                                                                      | 1    | 1 | S02 |
| .....ugAgggugguuaggggaagaua.....                                                                                     | 1    | 1 | S02 |
| .....ugugggugguuaggggaagaua.....                                                                                     | 4    | 1 | S02 |
| .....uAugggugguuaggggaagaua.....                                                                                     | 3    | 1 | S02 |
| .....Agugggugguuaggggaagaua.....                                                                                     | 3    | 1 | S02 |
| .....uguggguAguuaggggaagaua.....                                                                                     | 5    | 1 | S02 |
| .....ugugggugguuaggggaagaGa.....                                                                                     | 1    | 1 | S02 |
| .....ugugggugguGuaggggaagaua.....                                                                                    | 6    | 1 | S02 |
| .....ugugggugguuagUgaagaua.....                                                                                      | 1    | 1 | S02 |
| .....ugugggugguuaggggaGgaua.....                                                                                     | 3    | 1 | S02 |
| .....ugGgggugguuaggggaagaua.....                                                                                     | 1    | 1 | S02 |
| .....ugugggugguuaggggaagaCa.....                                                                                     | 6    | 1 | S02 |
| .....ugugggugguuaggggaagauG.....                                                                                     | 25   | 1 | S02 |
| .....ugugggugguuaggggCagaua.....                                                                                     | 1    | 1 | S02 |
| .....ugugggugguuagggUaagaua.....                                                                                     | 1    | 1 | S02 |
| .....ugugggugguuagggGagaua.....                                                                                      | 9    | 1 | S02 |
| .....ugugggGggguuaggggaagaua.....                                                                                    | 8    | 1 | S02 |
| .....ugugggugguuaggggaagauaC.....                                                                                    | 3    | 1 | S02 |
| .....ugugggugguuaggggaagauaa.....                                                                                    | 1    | 0 | S02 |
| .....ugugggugguuaggggaagauaaacu.....                                                                                 | 1    | 0 | S02 |
| .....ugugggugguuaggggaagauaacA.....                                                                                  | 1    | 1 | S02 |
| .....gugggugguuaggggaagau.....                                                                                       | 7    | 0 | S02 |
| .....Uugggugguuaggggaagau.....                                                                                       | 1    | 1 | S02 |
| .....gugggugguuaggggaagaua.....                                                                                      | 28   | 0 | S02 |
| .....gugggugguuaggggaagauG.....                                                                                      | 1    | 1 | S02 |
| .....gugggugguuaggggaagauU.....                                                                                      | 1    | 1 | S02 |
| .....gugggugguuaggggaagauC.....                                                                                      | 4    | 1 | S02 |
| .....gugggugguuaggggaagauaacu.....                                                                                   | 1    | 0 | S02 |
| .....ugggugguGuaggggaagau.....                                                                                       | 1    | 1 | S02 |
| .....ugggugguuaggggaagau.....                                                                                        | 1    | 0 | S02 |
| .....uggggugguuaggggaagaua.....                                                                                      | 2    | 0 | S02 |
| .....uaacuaguuugaauuuguuuag.....                                                                                     | 1    | 0 | S02 |
| .....uauuucccuacuccaccccaugcc.....                                                                                   | 2    | 0 | S02 |
| .....aucuucccuacuccaccccaugc.....                                                                                    | 1    | 0 | S02 |
| .....aucuucccuacuccaccccaugcc.....                                                                                   | 1    | 0 | S02 |
| .....ucuuccGuacuccaccca.....                                                                                         | 1    | 1 | S02 |
| .....ucuucccuacuccaccca.....                                                                                         | 11   | 0 | S02 |
| .....ucuucccuacuucUaccca.....                                                                                        | 1    | 1 | S02 |
| .....ucuucccuacuccaccccau.....                                                                                       | 3    | 0 | S02 |
| .....uUuucccuacuccaccccau.....                                                                                       | 1    | 1 | S02 |



## Mature

## Star

ggauuuugggaagguuuuggugugggugguuagggagauaacuaacuaguugaauauguuaagguuuuguuuaucuucccuacuccacccaugccauaguuuuccauc

|                                  |      |   |     |
|----------------------------------|------|---|-----|
| .....ucuucccuacuccaccaCg.....    | 1    | 1 | S02 |
| .....ucuucccuacuccaccaug.....    | 19   | 0 | S02 |
| .....ucuucccuacuccaccauU.....    | 2    | 1 | S02 |
| .....ucuucccuacuccaccGug.....    | 1    | 1 | S02 |
| .....ucuucccuacuccaccauA.....    | 1    | 1 | S02 |
| .....Ccuucccuacuccaccaugc.....   | 1    | 1 | S02 |
| .....ucuucccAacuccaccaugc.....   | 1    | 1 | S02 |
| .....ucuucccuacuccaccaCgc.....   | 1    | 1 | S02 |
| .....ucuCcccuacuccaccaugc.....   | 1    | 1 | S02 |
| .....ucuucccGacuccaccaugc.....   | 1    | 1 | S02 |
| .....ucuucccuacuccaccauUc.....   | 1    | 1 | S02 |
| .....Acuucccuacuccaccaugc.....   | 1    | 1 | S02 |
| .....ucuucccuacuccaAccaugc.....  | 1    | 1 | S02 |
| .....Ncuucccuacuccaccaugc.....   | 1    | 1 | S02 |
| .....ucuucccuacucUaccaugc.....   | 1    | 1 | S02 |
| .....uUuucccuacuccaccaugc.....   | 1    | 1 | S02 |
| .....ucuucccuacuccaccaugU.....   | 28   | 1 | S02 |
| .....ucuucccuacuccaccaugc.....   | 181  | 0 | S02 |
| .....ucuucccuacuccaUccaugc.....  | 1    | 1 | S02 |
| .....ucuucccuacuccaccaugG.....   | 1    | 1 | S02 |
| .....ucuucccuacuccaccaugA.....   | 6    | 1 | S02 |
| .....ucCucccuacuccaccaugc.....   | 1    | 1 | S02 |
| .....ucuucccuacuccaccaGgcc.....  | 2    | 1 | S02 |
| .....ucuucccuacuccaccaCgcc.....  | 4    | 1 | S02 |
| .....uUuucccuacuccaccaugcc.....  | 3    | 1 | S02 |
| .....ucuucccuacuccacGcaugcc..... | 1    | 1 | S02 |
| .....ucuCcccuacuccaccaugcc.....  | 2    | 1 | S02 |
| .....ucuuuAacuuccaccaugcc.....   | 5    | 1 | S02 |
| .....ucuucccuacuccaccauUcc.....  | 1    | 1 | S02 |
| .....ucuucccuacuccCccaugcc.....  | 2    | 1 | S02 |
| .....ucuucccuacuccGccaugcc.....  | 6    | 1 | S02 |
| .....ucuucccuacuccacUcaugcc..... | 1    | 1 | S02 |
| .....ucuucccGacuccaccaugcc.....  | 2    | 1 | S02 |
| .....ucuucccAacuccaccaugcc.....  | 1    | 1 | S02 |
| .....ucuuuUcuacuccaccaugcc.....  | 2    | 1 | S02 |
| .....ucCucccuacuccaccaugcc.....  | 3    | 1 | S02 |
| .....ucuucccuacuccaccCugcc.....  | 2    | 1 | S02 |
| .....ucuucccuacuccaccaugG.....   | 32   | 1 | S02 |
| .....ucuucccuacucAaccaugcc.....  | 1    | 1 | S02 |
| .....ucuucccuacuccaccauAcc.....  | 2    | 1 | S02 |
| .....Ccuucccuacuccaccaugcc.....  | 1    | 1 | S02 |
| .....ucuucccuacuccaccaugUc.....  | 2    | 1 | S02 |
| .....ucuucccuUcuccaccaugcc.....  | 1    | 1 | S02 |
| .....ucuuuGcuacuccaccaugcc.....  | 1    | 1 | S02 |
| .....ucuucccuacuccaccGugcc.....  | 3    | 1 | S02 |
| .....ucuucccuGcuccaccaugcc.....  | 2    | 1 | S02 |
| .....ucuuuUuacuccaccaugcc.....   | 1    | 1 | S02 |
| .....ucuucccuacuUaccaugcc.....   | 2    | 1 | S02 |
| .....ucuucccuAuccaccaugcc.....   | 1    | 1 | S02 |
| .....ucuucccuacuccaccaAgcc.....  | 1    | 1 | S02 |
| .....ucuucccuacuccaccaugU.....   | 283  | 1 | S02 |
| .....Ncuucccuacuccaccaugcc.....  | 3    | 1 | S02 |
| .....ucuucccuacuccaccaugcc.....  | 1090 | 0 | S02 |
| .....ucuucccuacuccaccUaugcc..... | 2    | 1 | S02 |
| .....ucuucccCacuccaccaugcc.....  | 3    | 1 | S02 |
| .....ucuucccuacCccaaccaugcc..... | 5    | 1 | S02 |
| .....ucuucccuacuccaAccaugcc..... | 2    | 1 | S02 |
| .....ucuucccuacuccacAcaugcc..... | 1    | 1 | S02 |
| .....ucuucccuacuccaccauCcc.....  | 1    | 1 | S02 |
| .....ucuucccuacGccaaccaugcc..... | 1    | 1 | S02 |
| .....ucuGcccuacuccaccaugcc.....  | 2    | 1 | S02 |
| .....ucuucccuacuccaUccaugcc..... | 1    | 1 | S02 |
| .....ucuucccuacuAaccaugcc.....   | 1    | 1 | S02 |
| .....ucuucccuacAccaccaugcc.....  | 2    | 1 | S02 |
| .....ucuucccuacuccaccaugAc.....  | 3    | 1 | S02 |
| .....ucuucccuacuccaccNugcc.....  | 1    | 1 | S02 |
| .....ucuucccuacuccaGccaugcc..... | 1    | 1 | S02 |
| .....ucuucccuacuccaccGaugcc..... | 1    | 1 | S02 |
| .....ucuucccuUuccaccaugcc.....   | 3    | 1 | S02 |
| .....ucuucccuacuccUccaugcc.....  | 2    | 1 | S02 |

**Mature**

Star

ggauuuuugggaagguuuuggugugggugguuaggaagauaacuaacuaguuugaauauguuaagguuuuguuuaucuuuccuacuccaccaugccauaguuuucccauc

|                                     |    |   |     |
|-------------------------------------|----|---|-----|
| .....ucuucccuacuccacccaugCA.....    | 76 | 1 | S02 |
| .....ucuucccuGuccacccaugcc.....     | 4  | 1 | S02 |
| .....Acuucccuacuccacccaugcc.....    | 2  | 1 | S02 |
| .....ucAuucccuacuccacccaugcc.....   | 2  | 1 | S02 |
| .....Gcuucccuacuccacccaugcc.....    | 1  | 1 | S02 |
| .....ucuucccuacuccacccaugccG.....   | 1  | 1 | S02 |
| .....ucuucccuacuccacccaugcca.....   | 1  | 0 | S02 |
| .....ucuucccuacuccacccaugccU.....   | 6  | 1 | S02 |
| .....ucuucccuacuccacccaugccUu.....  | 1  | 1 | S02 |
| .....ucuucccuacuccacccaugccaua..... | 1  | 0 | S02 |
| .....cuucccuacuccacccaug.....       | 1  | 0 | S02 |
| .....cuucccuacuccacccauC.....       | 1  | 1 | S02 |
| .....cuucccuacuccacccaU.....        | 1  | 1 | S02 |
| .....cuucccuacuccacccGugc.....      | 1  | 1 | S02 |
| .....cuucccuacuccacccaugc.....      | 3  | 0 | S02 |
| .....cuCcccuacuccacccaugcc.....     | 1  | 1 | S02 |
| .....cuucccuacuccacccaugcc.....     | 14 | 0 | S02 |
| .....cuucccuacuccacccaugcU.....     | 5  | 1 | S02 |
| .....cuucccuacuccacccaugccG.....    | 1  | 1 | S02 |
| .....cuucccuacuccacccaugcca.....    | 9  | 0 | S02 |
| .....cuucccuacuccacccaugccU.....    | 1  | 1 | S02 |
| .....cuucccuacuccacccaugccaC.....   | 1  | 1 | S02 |
| .....cuucccuacuccacccaugccau.....   | 1  | 0 | S02 |
| .....cuucccuacuccacccaugccaua.....  | 3  | 0 | S02 |
| .....uucccuacuccacccaug.....        | 2  | 0 | S02 |
| .....uucccuacuGcaccgaug.....        | 1  | 1 | S02 |
| .....uucccuacuccacccaUcc.....       | 1  | 1 | S02 |
| .....uucccuacuccacccaugcc.....      | 8  | 0 | S02 |
| .....uucccuacuccacccaugcU.....      | 2  | 1 | S02 |
| .....uucccuacuccacccaugcG.....      | 1  | 1 | S02 |
| .....uucccuacuccacccaugccG.....     | 1  | 1 | S02 |
| .....uucccuacuccacccaugcca.....     | 2  | 0 | S02 |
| .....uucccuacuccacccaugccaG.....    | 1  | 1 | S02 |
| .....uucccuacuccacccaugccaC.....    | 1  | 1 | S02 |
| .....uucccuacuccacccaCgcca.....     | 1  | 1 | S02 |
| .....uucccuacuccacccaugccau.....    | 15 | 0 | S02 |
| .....uucccuacuccacGcgaugcca.....    | 1  | 1 | S02 |
| .....uucccuacuccacccaugGcaua.....   | 1  | 1 | S02 |
| .....uucccuacuccacccaugccauC.....   | 1  | 1 | S02 |
| .....uucccuacuccacccaugccaua.....   | 11 | 0 | S02 |
| .....uucccuacuccacccaugccauU.....   | 1  | 1 | S02 |
| .....uucccuacuccacccaugccauG.....   | 2  | 1 | S02 |
| .....uucccuacuccacccaugccauag.....  | 2  | 0 | S02 |
| .....uucUcuacuccacccaugccauag.....  | 1  | 1 | S02 |
| .....uucccuacuccacccaugccauagu..... | 3  | 0 | S02 |
| .....uucccuacuccacccaugccauagA..... | 1  | 1 | S02 |
| .....ucccuacuccacccaugc.....        | 1  | 0 | S02 |
| .....ucccuacuccacccaugcc.....       | 2  | 0 | S02 |
| .....ucccuacuccacccaugcU.....       | 4  | 1 | S02 |
| .....ucccuacuccacccaugcca.....      | 2  | 0 | S02 |
| .....ucccuacuccacccaugccaC.....     | 1  | 1 | S02 |
| .....ucccuacuccacccaugccau.....     | 10 | 0 | S02 |
| .....ucccuacuccacccaugccaG.....     | 1  | 1 | S02 |
| .....Ncccuacuccacccaugccaua.....    | 1  | 1 | S02 |
| .....ucccuacuccacccaugccaua.....    | 19 | 0 | S02 |
| .....ucccuacuccacccaugccauag.....   | 1  | 0 | S02 |
| .....ucccuacuccacccaugccauagu.....  | 7  | 0 | S02 |
| .....ucccuacuccacccaugccauagG.....  | 2  | 1 | S02 |
| .....cccuacuccacccaugcc.....        | 1  | 0 | S02 |
| .....cccuacuccacccaugccaua.....     | 1  | 0 | S02 |
| .....ccuacuccacccaugccau.....       | 1  | 0 | S02 |
| .....cagcccauaguuucccauU.....       | 1  | 1 | S02 |

5' AUUUUUCAUUUUA GA AAACGACAUGUGGCAC AAG UAAUA  
3' UGAAGGUCAAUUUUUUGCUCUGCACUGUG GAG GUUUG GUUA

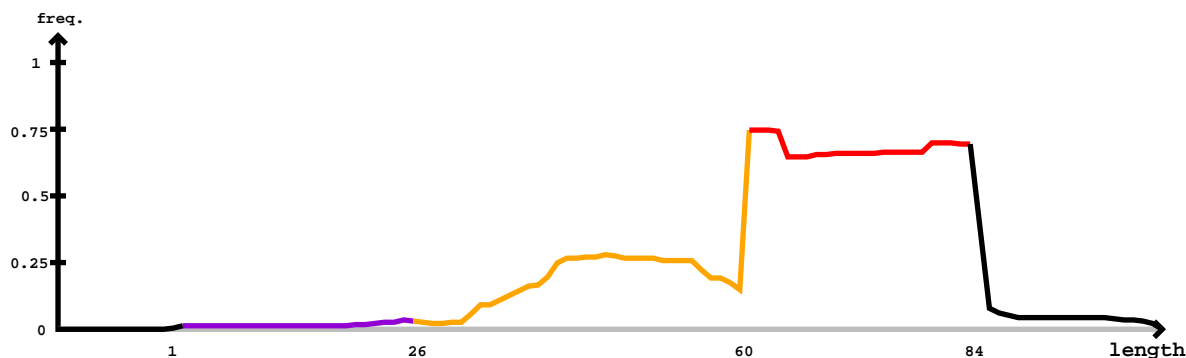

## Mature

## Star

## Mature

|                                                                                                  |                     |   |     |  |
|--------------------------------------------------------------------------------------------------|---------------------|---|-----|--|
| cucaccaugaaauuuucauuuuuagaaaaacgauguggcacaagauaaauaauaugauugguugggaggugucacgugucguuuuuuaguggaagu | cucacggugagaacguccc |   |     |  |
| .....gaagucucacggugagaacguc..                                                                    | 1                   | 0 | S01 |  |
| .....gaagucucacggugagaacgucc.                                                                    | 1                   | 0 | S01 |  |
| .....gaagucucacggugagaacguccc                                                                    | 3                   | 0 | S01 |  |
| .....auguggcacaagauaaauaauaugau..                                                                | 1                   | 0 | S02 |  |
| .....gugAcacaagauaaauaauaugauu..                                                                 | 1                   | 1 | S02 |  |
| .....aagauaaauaauaugauugUuuggag..                                                                | 2                   | 1 | S02 |  |
| .....aagauaaauaauaugauugguuggaUg..                                                               | 1                   | 1 | S02 |  |
| .....agauaaGauaugauugguu..                                                                       | 1                   | 1 | S02 |  |
| .....agauaaauaauaugauugguuggaUg..                                                                | 3                   | 1 | S02 |  |
| .....agauaaauaauaugauugguugAagg..                                                                | 1                   | 1 | S02 |  |
| .....agauaaauaauaugauugUuuggagg..                                                                | 1                   | 1 | S02 |  |
| .....uaauaauaugauugguuggaUgugu..                                                                 | 4                   | 1 | S02 |  |
| .....aaauaauaugauugguuggaUgugu..                                                                 | 1                   | 1 | S02 |  |
| .....aaauaauaugauugguuggaUguguc..                                                                | 3                   | 1 | S02 |  |
| .....auaauaugauugguuggaUgugucac..                                                                | 1                   | 1 | S02 |  |
| .....uaauaugauugguuggaUgugucac..                                                                 | 1                   | 1 | S02 |  |
| .....auaugauugguuggaUgugu..                                                                      | 1                   | 1 | S02 |  |
| .....auaugauugguuggaUgugucacg..                                                                  | 2                   | 1 | S02 |  |
| .....uaugauugguuggaUgugucacgu..                                                                  | 5                   | 1 | S02 |  |
| .....augauugguuggaUgugucacgu..                                                                   | 1                   | 1 | S02 |  |
| .....gauugguuggaUgugucacgu..                                                                     | 1                   | 1 | S02 |  |
| .....uugguuggaUgugucacgu..                                                                       | 1                   | 1 | S02 |  |
| .....acgCgucguuuuuuaguggaagu..                                                                   | 1                   | 1 | S02 |  |
| .....acgugucguuuuuuaguggaagG..                                                                   | 7                   | 1 | S02 |  |
| .....acgugucguuuuuuaguggaagu..                                                                   | 47                  | 0 | S02 |  |
| .....acgugCcguuuuuuuaguggaagu..                                                                  | 1                   | 1 | S02 |  |
| .....acgugucguuuuuCaaguggaagu..                                                                  | 1                   | 1 | S02 |  |
| .....acgugucguuuuuuaguggaagC..                                                                   | 4                   | 1 | S02 |  |
| .....acgAgucguuuuuuaguggaagu..                                                                   | 1                   | 1 | S02 |  |
| .....acgugucguuuuAuuuaguggaagu..                                                                 | 1                   | 1 | S02 |  |
| .....acgugucgGuuuuuuaguggaagu..                                                                  | 2                   | 1 | S02 |  |
| .....acgugucguuuuuuagugAaagu..                                                                   | 1                   | 1 | S02 |  |
| .....gugucguuuuuuaguggaagucu..                                                                   | 2                   | 0 | S02 |  |
| .....ugucguuuuuuaguggaagucuc..                                                                   | 1                   | 0 | S02 |  |
| .....guuuuuuaguggaagucuca..                                                                      | 2                   | 0 | S02 |  |
| .....aaguggaagucucacggugagaac....                                                                | 1                   | 0 | S02 |  |
| .....gaagucucacggugagaacgucc..                                                                   | 1                   | 0 | S02 |  |
| .....gaagucucacggugagaacguccU                                                                    | 1                   | 1 | S02 |  |
| .....gaagucucacggugagaacguccc                                                                    | 1                   | 0 | S02 |  |

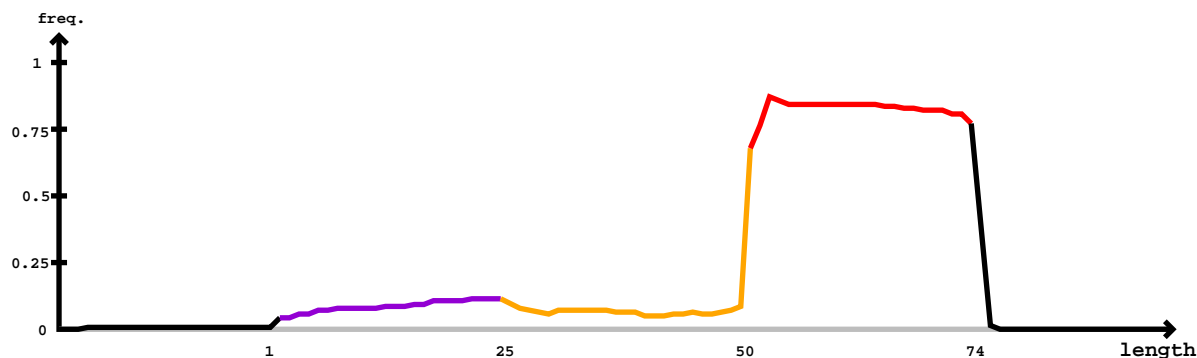

## Mature

[illegible]

Star

Mature

|                                                                                                                   |    |   |     |
|-------------------------------------------------------------------------------------------------------------------|----|---|-----|
| uaacugaaaaggcagauguuuauagcuuuggaauguagucauggagguuguuuguggaagaaagaauuuagaucgaucgcauucugaagggaugcauacauuugcuccuuuuu |    |   |     |
| .....aucgaucgcaGucugaagggaugc.....                                                                                | 4  | 1 | S01 |
| .....aucgaucCcauucugaagggaugc.....                                                                                | 1  | 1 | S01 |
| .....aucgaucgcauucugaagggaugca.....                                                                               | 2  | 0 | S01 |
| .....auagcuuuggaauguagucaugg.....                                                                                 | 2  | 0 | S02 |
| .....cuuuggGauuguagucauggaggu.....                                                                                | 1  | 1 | S02 |
| .....uuggaauguagucauggagguu.....                                                                                  | 1  | 0 | S02 |
| .....auuguagucauggagguuguCugu.....                                                                                | 1  | 1 | S02 |
| .....guagucauggagguuguCugugga.....                                                                                | 1  | 1 | S02 |
| .....agucauggaAguuguuugugga.....                                                                                  | 1  | 1 | S02 |
| .....aaagaauuuagaucgaucAcauu.....                                                                                 | 1  | 1 | S02 |
| .....aagaauuuagaucgaucgcaGucu.....                                                                                | 1  | 1 | S02 |
| .....gaaauuagaucgaucgcauucuaA.....                                                                                | 1  | 1 | S02 |
| .....uuuagaucgaucgcauucugaagg.....                                                                                | 1  | 0 | S02 |
| .....agaucgaucgcauucugaagggaCg.....                                                                               | 2  | 1 | S02 |
| .....agaucgaucgcaGucugaagggaug.....                                                                               | 2  | 1 | S02 |
| .....agaucgaucgcauucugaagggaUA.....                                                                               | 1  | 1 | S02 |
| .....agaucgaucgcauucugGagggaug.....                                                                               | 1  | 1 | S02 |
| .....agaucgaucgcauucugaagggaug.....                                                                               | 22 | 0 | S02 |
| .....gaucgaucgcaGucugaagggaugc.....                                                                               | 1  | 1 | S02 |
| .....gaucgaucgcauucugaagggaugc.....                                                                               | 1  | 0 | S02 |
| .....aucgaucgcaGucugaagggaugc.....                                                                                | 2  | 1 | S02 |
| .....aucgaucgcauucugaUgggaugc.....                                                                                | 1  | 1 | S02 |

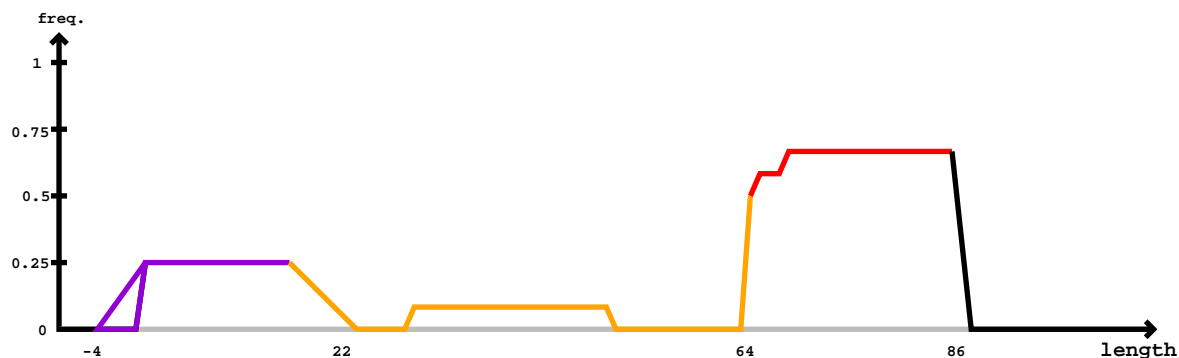

## Mature

[illegible]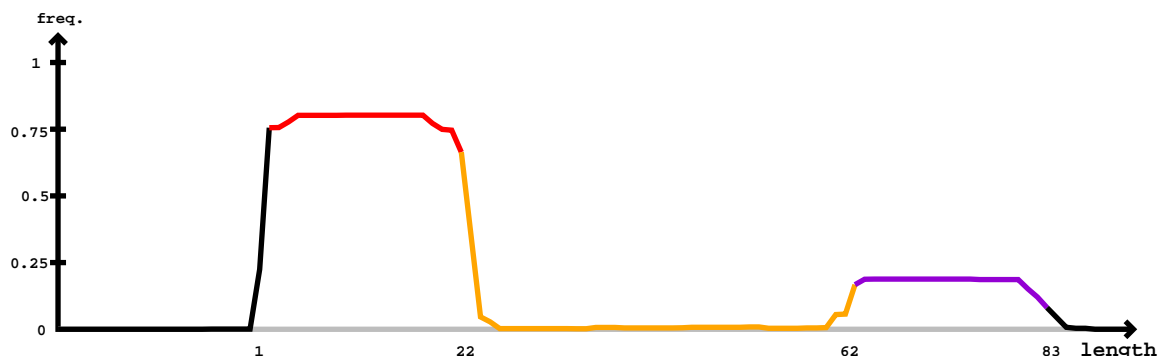

Star

[illegible]



## Mature

## Star

|                                                                                                               |     |   |     |
|---------------------------------------------------------------------------------------------------------------|-----|---|-----|
| agacuugaugcaucauuuuugaccaugagagagcagcgcuuguugguagucauucaaugagauauggcugcauacaagcgugcucuaucucguugucauauugauuugc |     |   |     |
| .....ugaccaugagagagUgcacgc.....                                                                               | 2   | 1 | S01 |
| .....Ngaccaugagagagcagcg.....                                                                                 | 1   | 1 | S01 |
| .....ugaccaugagagagaAcacgc.....                                                                               | 1   | 1 | S01 |
| .....ugaccaugagagagagcaAgc.....                                                                               | 3   | 1 | S01 |
| .....ugaccauAagagagagcagcg.....                                                                               | 2   | 1 | S01 |
| .....ugaccaugagagagagAacgc.....                                                                               | 1   | 1 | S01 |
| .....ugaccaugagagagGgcacgc.....                                                                               | 2   | 1 | S01 |
| .....ugaccaugagagagagcagG.....                                                                                | 2   | 1 | S01 |
| .....ugaccaugagagagagcagcA.....                                                                               | 12  | 1 | S01 |
| .....ugaccaugagagagagcagcU.....                                                                               | 66  | 1 | S01 |
| .....ugacCaugagagagagcagcg.....                                                                               | 1   | 1 | S01 |
| .....ugaccaugagagagagcagcC.....                                                                               | 2   | 1 | S01 |
| .....ugaccaugagagagagcagcg.....                                                                               | 399 | 0 | S01 |
| .....ugacaCugagagagagcagcg.....                                                                               | 1   | 1 | S01 |
| .....ugaccaauUagagagagcagcg.....                                                                              | 1   | 1 | S01 |
| .....ugaccaaugGgagagagcagcg.....                                                                              | 1   | 1 | S01 |
| .....ugaccaaugUgagagagcagcg.....                                                                              | 2   | 1 | S01 |
| .....ugaccaugagagagagcaUgc.....                                                                               | 2   | 1 | S01 |
| .....ugacaaCgagagagagcagcg.....                                                                               | 1   | 1 | S01 |
| .....ugaccaugagagagCgcacgc.....                                                                               | 1   | 1 | S01 |
| .....ugacGaugagagagagcagcg.....                                                                               | 2   | 1 | S01 |
| .....ugaccaugagagagagcGcg.....                                                                                | 1   | 1 | S01 |
| .....ugacaGugagagagagcagcg.....                                                                               | 1   | 1 | S01 |
| .....ugaccaugagaCagagcagcg.....                                                                               | 1   | 1 | S01 |
| .....ugaccaugagagagagUacgc.....                                                                               | 1   | 1 | S01 |
| .....ugaccaugagagagagcagcguU.....                                                                             | 2   | 1 | S01 |
| .....gaccaugagagagagcagcU.....                                                                                | 1   | 1 | S01 |
| .....acGaugagagagagcagcg.....                                                                                 | 1   | 1 | S01 |
| .....accaugagagagagcagcg.....                                                                                 | 1   | 0 | S01 |
| .....accaugagagagagcagcg.....                                                                                 | 1   | 0 | S01 |
| .....accaugagagagagcagcgu.....                                                                                | 2   | 0 | S01 |
| .....accaugagagagagcagcguu.....                                                                               | 9   | 0 | S01 |
| .....accaGugagagagagcagcguu.....                                                                              | 1   | 1 | S01 |
| .....accaugagagagagcagcguC.....                                                                               | 3   | 1 | S01 |
| .....accaugagagagagcagcguA.....                                                                               | 1   | 1 | S01 |
| .....caugagagagagcagcgu.....                                                                                  | 1   | 0 | S01 |
| .....caugagagagagcagcguu.....                                                                                 | 1   | 0 | S01 |
| .....caugagagagagcagcguuA.....                                                                                | 1   | 1 | S01 |
| .....caugagagagagcUcgcuug.....                                                                                | 1   | 1 | S01 |
| .....caugagagagagcagcguug.....                                                                                | 19  | 0 | S01 |
| .....caugagGgagagcagcguug.....                                                                                | 1   | 1 | S01 |
| .....caugagagagagcagcguuU.....                                                                                | 1   | 1 | S01 |
| .....agagagagcagcguCguugguagu.....                                                                            | 1   | 1 | S01 |
| .....acgcuuguugguagucauuU.....                                                                                | 2   | 1 | S01 |
| .....uucaaugagauauggcug.....                                                                                  | 2   | 0 | S01 |
| .....uauaggcugcauacaagcgugc.....                                                                              | 1   | 0 | S01 |
| .....uauaggcugcauacaagcgugU.....                                                                              | 1   | 1 | S01 |
| .....uauaggcugcauacaGgcgugc.....                                                                              | 1   | 1 | S01 |
| .....ugcauacaagcgugcucuaucucg.....                                                                            | 2   | 0 | S01 |
| .....caagcgugcCcuauucg.....                                                                                   | 1   | 1 | S01 |
| .....caagcguaCucuaucucguuguc.....                                                                             | 1   | 1 | S01 |
| .....agcgugcucuaucucguuguc.....                                                                               | 2   | 0 | S01 |
| .....gcgugcucuaucucgCuguc.....                                                                                | 1   | 1 | S01 |
| .....gcgugcucuaucucCuuguc.....                                                                                | 1   | 1 | S01 |
| .....gcgugcucuaucucguuguc.....                                                                                | 27  | 0 | S01 |
| .....gcgGgucuaucucguuguc.....                                                                                 | 1   | 1 | S01 |
| .....gcgugcucuaucucguuguU.....                                                                                | 1   | 1 | S01 |
| .....gcgugcucuaucucguuUuc.....                                                                                | 2   | 1 | S01 |
| .....gcgugcucuaucucguuUuca.....                                                                               | 1   | 1 | S01 |
| .....gcgugcucuUucguuguca.....                                                                                 | 1   | 1 | S01 |
| .....gcgugcucuaucucguuguca.....                                                                               | 25  | 0 | S01 |
| .....gcgugcucuaucucguugucU.....                                                                               | 2   | 1 | S01 |
| .....gcgugcucuaCucguuguca.....                                                                                | 2   | 1 | S01 |
| .....cgugcucuaucucguuguc.....                                                                                 | 1   | 0 | S01 |
| .....cgugcAcuauucguuguca.....                                                                                 | 1   | 1 | S01 |
| .....gugcucuaucucguuguU.....                                                                                  | 1   | 1 | S01 |
| .....gugcucuaucucguuguc.....                                                                                  | 9   | 0 | S01 |
| .....gugcucuaucucguuguca.....                                                                                 | 4   | 0 | S01 |
| .....gugcucuaucucguuUucau.....                                                                                | 1   | 1 | S01 |
| .....gugcucuaucucguugucau.....                                                                                | 18  | 0 | S01 |

## Mature

## Star

agacuugaugcaucauuuuuugacaaugagagagagcagcgcuuguugguagucauucaaugagauauggcugcauacaagcgugcucuaucucguugucauugauuugc

|                                     |     |   |     |
|-------------------------------------|-----|---|-----|
| .....gugcucuaucucguugucaA.....      | 1   | 1 | S01 |
| .....gugcucuaucucguugucCu.....      | 1   | 1 | S01 |
| .....gugcuUuaucucguugucau.....      | 1   | 1 | S01 |
| .....gugcucuaucucguugucaC.....      | 1   | 1 | S01 |
| .....gugcucuaucucguugCcau.....      | 2   | 1 | S01 |
| .....gugcucuaucucguugucau.....      | 51  | 0 | S01 |
| .....gugcucuaucucguugucauC.....     | 1   | 1 | S01 |
| .....gugcucuaucucguugucaAa.....     | 1   | 1 | S01 |
| .....gugcucuGucucguugucaua.....     | 1   | 1 | S01 |
| .....gugcucuaucucguugucauauU.....   | 2   | 1 | S01 |
| .....ugcucuaucAegugucau.....        | 1   | 1 | S01 |
| .....ugcucuaucucguugucau.....       | 6   | 0 | S01 |
| .....uCcucuaucucguugucau.....       | 1   | 1 | S01 |
| .....ugcucuaucucguugucaua.....      | 10  | 0 | S01 |
| .....ugcucuaucucguugucauau.....     | 3   | 0 | S01 |
| .....ugcucuaucucguugucauaC.....     | 1   | 1 | S01 |
| .....ugcucuaucucguugucauauug.....   | 1   | 0 | S01 |
| .....ugcucuaucucguugucauauC.....    | 1   | 1 | S01 |
| .....ugcucuaucucguugucauauaug.....  | 1   | 0 | S01 |
| .....ugcucuaucucguugucauauugaC..... | 1   | 1 | S01 |
| .....gcucuaucucguugucauauug.....    | 1   | 0 | S01 |
| .....ucuaucucguugucauauaug.....     | 2   | 0 | S01 |
| .....uugacaaugagagGgagc.....        | 1   | 1 | S02 |
| .....uugacaaugagagagagA.....        | 1   | 1 | S02 |
| .....uugacaaugagagagagU.....        | 5   | 1 | S02 |
| .....uugacaaugagagagagc.....        | 12  | 0 | S02 |
| .....uugacaaugagagagagcU.....       | 1   | 1 | S02 |
| .....uugacaaugagagagagcA.....       | 2   | 0 | S02 |
| .....uugacaaugGgagagagcag.....      | 1   | 1 | S02 |
| .....uugacaaugagagagagcag.....      | 43  | 0 | S02 |
| .....uugacaaugagagagagUacg.....     | 1   | 1 | S02 |
| .....uugGcaaugagagagagcag.....      | 1   | 1 | S02 |
| .....uugacaaCgagagagagcag.....      | 1   | 1 | S02 |
| .....uugacaaugagGgagagcag.....      | 1   | 1 | S02 |
| .....uugacaaugagagagagcA.....       | 5   | 1 | S02 |
| .....uGgacaaugagagagagcag.....      | 1   | 1 | S02 |
| .....uugacGaugagagagagcagcg.....    | 1   | 1 | S02 |
| .....uugacaauCagagagagcagcg.....    | 1   | 1 | S02 |
| .....uugacaaugagagagcaUgc.....      | 1   | 1 | S02 |
| .....uugacUaugagagagagcagcg.....    | 1   | 1 | S02 |
| .....uugacaaugaCagagagcagcg.....    | 1   | 1 | S02 |
| .....uugacaaugagagagagcagcg.....    | 63  | 0 | S02 |
| .....uugGcaaugagagagagcagcg.....    | 1   | 1 | S02 |
| .....uugacaaugagagagagcagA.....     | 1   | 1 | S02 |
| .....uugacaaugagagagagcagU.....     | 10  | 1 | S02 |
| .....uugacaaugagagUgagcagcg.....    | 1   | 1 | S02 |
| .....uugacaaugagagagagcagcgCu.....  | 1   | 1 | S02 |
| .....ugacaaugagagagagcG.....        | 3   | 1 | S02 |
| .....ugacaaugagagagagcA.....        | 8   | 0 | S02 |
| .....ugacaaugagagagagcAa.....       | 1   | 1 | S02 |
| .....ugacaaugagagagagcaU.....       | 1   | 1 | S02 |
| .....ugacaaugagagagagcac.....       | 1   | 0 | S02 |
| .....ugacaaugagagagagcag.....       | 7   | 0 | S02 |
| .....ugacaaugagagagagcacA.....      | 1   | 1 | S02 |
| .....uAacaaugagagagagcagcg.....     | 1   | 1 | S02 |
| .....ugacUaugagagagagcagcg.....     | 1   | 1 | S02 |
| .....ugacaaugagagagagcagU.....      | 34  | 1 | S02 |
| .....ugacaaugagagagagcagG.....      | 1   | 1 | S02 |
| .....ugacaaugagagagagcagcg.....     | 225 | 0 | S02 |
| .....ugGcaaugagagagagcagcg.....     | 1   | 1 | S02 |
| .....ugacGaugagagagagcagcg.....     | 1   | 1 | S02 |
| .....ugacaaugagagagagcaGgc.....     | 2   | 1 | S02 |
| .....ugacaaugagaAagagcagcg.....     | 2   | 1 | S02 |
| .....ugacaaugaAagagagcagcg.....     | 2   | 1 | S02 |
| .....ugacaaugagagagagcaUgc.....     | 1   | 1 | S02 |
| .....ugacaaugagagagaUcacgc.....     | 1   | 1 | S02 |
| .....ugacaaugagagagagcaAgc.....     | 2   | 1 | S02 |
| .....ugacaaugagagagagUacgc.....     | 1   | 1 | S02 |
| .....ugacaaugagagagagcacCc.....     | 1   | 1 | S02 |

## Mature

## Star

|                                                                                                             |    |   |     |
|-------------------------------------------------------------------------------------------------------------|----|---|-----|
| agacuugaugcauauuuuugacaaugagagagagcagcguuguugguagucuucaaugagauauggcugcauacaagcgugcucuaucucguugucauaugauuugc |    |   |     |
| .....ugacaaugagagagagcagcA.....                                                                             | 10 | 1 | S02 |
| .....ugacaaugagagagCgcacgc.....                                                                             | 1  | 1 | S02 |
| .....ugacaaugagagagGgcacgc.....                                                                             | 1  | 1 | S02 |
| .....ugacaaugagagCgagcagc.....                                                                              | 1  | 1 | S02 |
| .....ugacaaugGgagagagcagc.....                                                                              | 2  | 1 | S02 |
| .....ugacaaugagagagcagcAc.....                                                                              | 2  | 1 | S02 |
| .....ugacaaugagGgagagcagc.....                                                                              | 2  | 1 | S02 |
| .....ugacaaugagagagcagcgcG.....                                                                             | 1  | 1 | S02 |
| .....ugacaaugagagagcagcgcUg.....                                                                            | 1  | 1 | S02 |
| .....acaaugagagagagcagc.....                                                                                | 1  | 0 | S02 |
| .....acaaugagagagagcagcguu.....                                                                             | 11 | 0 | S02 |
| .....acaaugagagagagcagcguC.....                                                                             | 3  | 1 | S02 |
| .....caaugagagagagcagcguug.....                                                                             | 10 | 0 | S02 |
| .....caaugaCagagagcagcguug.....                                                                             | 1  | 1 | S02 |
| .....caaGgagagagagcagcguug.....                                                                             | 1  | 1 | S02 |
| .....caaugagUgagagcagcguug.....                                                                             | 1  | 1 | S02 |
| .....caaugagagagagcagcguCg.....                                                                             | 1  | 1 | S02 |
| .....caaugagagUgagcagcguug.....                                                                             | 1  | 1 | S02 |
| .....acgcuuguugguagucuuU.....                                                                               | 1  | 1 | S02 |
| .....uucaaugagauauggcug.....                                                                                | 6  | 0 | S02 |
| .....auauggcugcauacaagc.....                                                                                | 1  | 0 | S02 |
| .....gcgugcucuaucucguuguc.....                                                                              | 3  | 0 | S02 |
| .....gcgugcucuaUueguuguc.....                                                                               | 1  | 1 | S02 |
| .....gcgugcCcuauucucguuguc.....                                                                             | 1  | 1 | S02 |
| .....gcgugcucuaucucguuguca.....                                                                             | 7  | 0 | S02 |
| .....gcgugcucuaucucguugucC.....                                                                             | 1  | 1 | S02 |
| .....gcgugcucuaucucguugucU.....                                                                             | 2  | 1 | S02 |
| .....cgugcucuaucucguugucauuU.....                                                                           | 1  | 1 | S02 |
| .....gugcucuaucucguuguc.....                                                                                | 3  | 0 | S02 |
| .....gugcucuaucucguuUuc.....                                                                                | 1  | 1 | S02 |
| .....Cugcucuaucucguuguca.....                                                                               | 1  | 1 | S02 |
| .....gugcucuaucucguuguca.....                                                                               | 2  | 0 | S02 |
| .....gugcucuaucucguugucG.....                                                                               | 1  | 1 | S02 |
| .....gugcucuGucucguugucau.....                                                                              | 1  | 1 | S02 |
| .....gugcucuaUueguugucau.....                                                                               | 1  | 1 | S02 |
| .....gugcucuaucucguugucau.....                                                                              | 28 | 0 | S02 |
| .....gugGucuaucucguugucau.....                                                                              | 1  | 1 | S02 |
| .....Uugcucuaucucguugucau.....                                                                              | 1  | 1 | S02 |
| .....gugcucuaCcucguugucau.....                                                                              | 1  | 1 | S02 |
| .....Augcucuaucucguugucau.....                                                                              | 1  | 1 | S02 |
| .....gugcucuaucucguugucau.....                                                                              | 38 | 0 | S02 |
| .....gugcucuaucucguugucauG.....                                                                             | 1  | 1 | S02 |
| .....Cugcucuaucucguugucau.....                                                                              | 1  | 1 | S02 |
| .....gugcucGaucucguugucau.....                                                                              | 1  | 1 | S02 |
| .....gugcucuaucucguugucGua.....                                                                             | 1  | 1 | S02 |
| .....Cgcucuaucucguugucau.....                                                                               | 1  | 1 | S02 |
| .....ugcucuaucucguugucau.....                                                                               | 2  | 0 | S02 |
| .....ugcucuaucucguugucau.....                                                                               | 2  | 0 | S02 |
| .....ugcucuaucucguugucauu.....                                                                              | 1  | 0 | S02 |
| .....ugcucuaucucguugucauugau.....                                                                           | 1  | 0 | S02 |
| .....ucuauucucguugucauugau.....                                                                             | 1  | 0 | S02 |

Provisional ID : Maple\_Unigene\_BMK.34899\_169283  
Score total : 1.8  
Score for star read(s) : 3.9  
Score for read counts : 3.2  
Score for mfe : -4.6  
Score for randfold : 0  
Score for cons. seed : -0.6  
Total read count : 18  
Mature read count : 15  
Loop read count : 2  
Star read count : 1

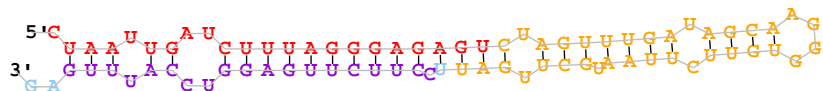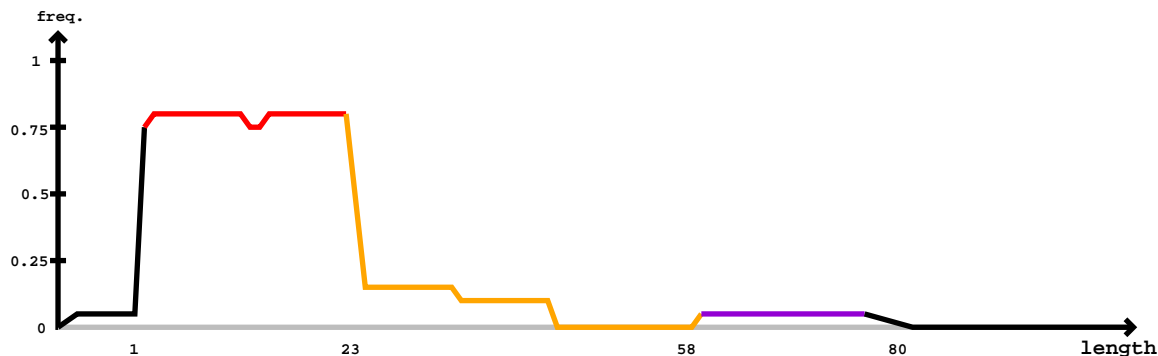

Mature

Star

| 5' -                                                                                        |                          | -3'   | obs |        |
|---------------------------------------------------------------------------------------------|--------------------------|-------|-----|--------|
| agaaguccuaauugaucuuuagggagagagucuaaguuuugauagcaaggguguuucuaaugcuugauuccuucuuagagguccauuug   | agaaaaaguuuaagcguuccaaua |       |     |        |
| agaaguccuaauugaucuuuagggagagagucuaaguuuugauagcaaggguguuucuaaugcuugauuccuucuuagagguccauuugag | uaaaaaguuuaagcguuccaaua  |       |     |        |
| ...(((((.....)))))).....                                                                    |                          | reads | mm  | sample |
| .....cuaauugaucuuuaggaagagu.....                                                            |                          | 9     | 1   | S01    |
| .....aggagagucuaaguugaua.....                                                               |                          | 1     | 0   | S01    |
| .....cUuucuuagagguccauuug.....                                                              |                          | 1     | 1   | S01    |
| aCaaguccuaauugaucu.....                                                                     |                          | 1     | 1   | S02    |
| .....cuaauugaucuuuaggaagagu.....                                                            |                          | 5     | 1   | S02    |
| .....uaauugaucuuuaggaagagu.....                                                             |                          | 1     | 1   | S02    |
| .....cuaguuuugauagcaagggugu.....                                                            |                          | 2     | 0   | S02    |

Provisional ID : Maple\_Unigene\_BMK.35372\_174784  
Score total : 408.4  
Score for star read(s) : 3.9  
Score for read counts : 404.9  
Score for mfe : -3.3  
Score for randfold : 0  
Score for cons. seed : 3  
Total read count : 806  
Mature read count : 587  
Loop read count : 218  
Star read count : 1

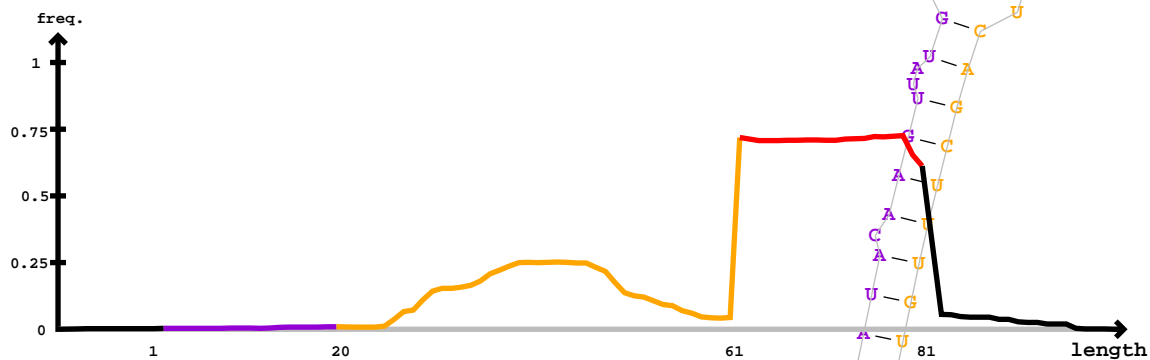

Star

Mature

| 5'                                                                                                            | 3' | obs | exp | reads | mm | sample |
|---------------------------------------------------------------------------------------------------------------|----|-----|-----|-------|----|--------|
| uaugaagcgcauggauacaaguuauugccuuggaauagaagacaauuccgaauacagcuuugucuaagcaaggaagcuauaaguuauugcaacuaugaaucauaggaga |    |     |     |       |    |        |
| uaugaagcgcauggauacaaguuauugccuuggaauagaagacaauuccgaauacagcuuugucuaagcaaggaagcuauaaguuauugcaacuaugaaucauaggaga |    |     |     |       |    |        |
| .....((((.....((((.....((((.....((((.....((((.....))))))))))))))))))))))))))))))))))))))))))))))))))))))))    |    |     |     |       |    |        |
| uaugaagcgcaCggauaca.....                                                                                      |    |     |     | 1     | 1  | S01    |
| .augaagcgcauggauacG.....                                                                                      |    |     |     | 1     | 1  | S01    |
| .....cauggauacaaguuauugcU.....                                                                                |    |     |     | 1     | 1  | S01    |
| .....uuauugccuuggaauagaagaU.....                                                                              |    |     |     | 1     | 1  | S01    |
| .....uuauugccuuggaauagaagacaauuU.....                                                                         |    |     |     | 1     | 1  | S01    |
| .....uauCccuuggaauagaaga.....                                                                                 |    |     |     | 1     | 1  | S01    |
| .....ccuuggaauagaagacaauucU.....                                                                              |    |     |     | 1     | 1  | S01    |
| .....aaugaaagacaauuccgaauca.....                                                                              |    |     |     | 1     | 0  | S01    |
| .....aaugaaagacaauuccgaaucaCc.....                                                                            |    |     |     | 1     | 1  | S01    |
| .....aaugaaagacaauuccgaauacagC.....                                                                           |    |     |     | 1     | 1  | S01    |
| .....aCgaaagacaauuccgaauuc.....                                                                               |    |     |     | 1     | 1  | S01    |
| .....augaaagacaauuccgaauca.....                                                                               |    |     |     | 1     | 0  | S01    |
| .....augaaagacaauuccgaauacag.....                                                                             |    |     |     | 2     | 0  | S01    |
| .....augaaagacaauuccgaauacagc.....                                                                            |    |     |     | 2     | 0  | S01    |
| .....augaaagacaauuccgaauacagcu.....                                                                           |    |     |     | 1     | 0  | S01    |
| .....augaaagacaauuccgaauacagcC.....                                                                           |    |     |     | 1     | 1  | S01    |
| .....augaaagacaauuccgaauacagcuu.....                                                                          |    |     |     | 1     | 0  | S01    |
| .....augaaagacaauuccgaauacagcuuug.....                                                                        |    |     |     | 1     | 0  | S01    |
| .....ugaaagacaauuccgaauacag.....                                                                              |    |     |     | 1     | 0  | S01    |
| .....ugaaagacaauuccgaauucaA.....                                                                              |    |     |     | 1     | 1  | S01    |
| .....ugaaagacaauuccgaauacagA.....                                                                             |    |     |     | 3     | 1  | S01    |
| .....ugaaagacaauuccgaauacagc.....                                                                             |    |     |     | 2     | 0  | S01    |
| .....ugaaagacaauuccgaauucaCc.....                                                                             |    |     |     | 1     | 1  | S01    |
| .....ugaaagacaauuccgaauacagcu.....                                                                            |    |     |     | 1     | 0  | S01    |
| .....ugaaagacaauuccgaauacagcG.....                                                                            |    |     |     | 1     | 1  | S01    |
| .....ugaaagacaauuccgaauacagcC.....                                                                            |    |     |     | 1     | 1  | S01    |
| .....ugaaagacaauuccgaauacagcuu.....                                                                           |    |     |     | 2     | 0  | S01    |
| .....gaaagacaauuccgaauuca.....                                                                                |    |     |     | 1     | 0  | S01    |
| .....gaaagacaauuccgaauucaCc.....                                                                              |    |     |     | 1     | 1  | S01    |
| .....gaaagacaauuccgaauacagc.....                                                                              |    |     |     | 1     | 0  | S01    |
| .....aaagacaauuccgaauuca.....                                                                                 |    |     |     | 4     | 0  | S01    |
| .....aaagacaauuccgaauacagc.....                                                                               |    |     |     | 5     | 0  | S01    |
| .....aaagacaauuccgaauucGgc.....                                                                               |    |     |     | 1     | 1  | S01    |

## Star

## Mature

uauagaagcgcauggauacaaguuaugccuuggaauagaaagacaaauccgaaucagcguuugucuaacgaacaaggaagcuauaaguaaugcaacuagaauucauggaga

|                                         |    |   |     |
|-----------------------------------------|----|---|-----|
| .....aaagacaaauccgaauucagU.....         | 1  | 1 | S01 |
| .....aaagacaaauccgaauucagcu.....        | 1  | 0 | S01 |
| .....Caagacaaauccgaauucagcu.....        | 1  | 1 | S01 |
| .....aaagacaaauccgaauucagcC.....        | 3  | 1 | S01 |
| .....aaagacaaauccgaauucagcuuug.....     | 1  | 0 | S01 |
| .....aagacaaauccgaauucag.....           | 3  | 0 | S01 |
| .....aagacaaauccgaauucagc.....          | 1  | 0 | S01 |
| .....aagacaaauccgaauucagU.....          | 2  | 1 | S01 |
| .....aagacaaauccgaauucagcA.....         | 1  | 1 | S01 |
| .....aagacaaauccgaauucagcu.....         | 4  | 0 | S01 |
| .....aagacaaauccgaauucagcC.....         | 1  | 1 | S01 |
| .....aagacaaauccgaauucagcuA.....        | 1  | 1 | S01 |
| .....aagacaaauccgaauucagcuC.....        | 1  | 1 | S01 |
| .....aagacaaauccgaauucagcuuu.....       | 1  | 0 | S01 |
| .....aagacaaauccgaauucagcuuug.....      | 1  | 0 | S01 |
| .....aagacaaauccgaauucagcuuugu.....     | 2  | 0 | S01 |
| .....agacaaauccgaauucagc.....           | 2  | 0 | S01 |
| .....agacaaauccgaauucagcu.....          | 1  | 0 | S01 |
| .....agacaaauccgaauucagcuu.....         | 1  | 0 | S01 |
| .....acaauuccgaauucagcuuugA.....        | 1  | 1 | S01 |
| .....caauuccgaauucagcuuu.....           | 1  | 0 | S01 |
| .....caauuccgaauucagcuuugucu.....       | 1  | 0 | S01 |
| .....aaauuccgaauucagcuuug.....          | 1  | 0 | S01 |
| .....aaauuccgaauucagcuuugu.....         | 1  | 0 | S01 |
| .....aaauuccgaauucagcuuuguc.....        | 1  | 0 | S01 |
| .....aaauuccgaauucagcuuugucua.....      | 1  | 0 | S01 |
| .....aaauuccgaauucagcuuugucuaU.....     | 1  | 1 | S01 |
| .....aaauuccgaauucagcuuugucuaU.....     | 1  | 1 | S01 |
| .....aaauuccgaauucagcuuugucuaCga.....   | 1  | 0 | S01 |
| .....aaauuccgaauucagcuuugucuaCgaac..... | 1  | 0 | S01 |
| .....auuccgaauucagcuuugu.....           | 1  | 0 | S01 |
| .....auuccgaauucagcuuuguc.....          | 1  | 0 | S01 |
| .....auuccgaauucagcuuugucC.....         | 1  | 1 | S01 |
| .....auuccgaauucagcuuugucu.....         | 3  | 0 | S01 |
| .....auuccgaauucagcuuugucua.....        | 1  | 0 | S01 |
| .....auuccgaauucagcuuugucuaU.....       | 1  | 1 | S01 |
| .....auuccgaauucagcuuugucuaC.....       | 1  | 1 | S01 |
| .....GuuccgaauucagcuuugucuaCgaac.....   | 1  | 1 | S01 |
| .....auuccgaauucagcuuugucuaCgaac.....   | 1  | 0 | S01 |
| .....uuccgaauucagcuuuguc.....           | 1  | 0 | S01 |
| .....uuccgaauucagcuuugucC.....          | 1  | 1 | S01 |
| .....uuccgaauucagcuuugucua.....         | 2  | 0 | S01 |
| .....uuccgaauucagcuuugucuaC.....        | 1  | 0 | S01 |
| .....uuccgaauucagcuuugucuaCgaac.....    | 1  | 0 | S01 |
| .....uccgaauucagcuuugucu.....           | 4  | 0 | S01 |
| .....uccgaauucagcuuugucuaC.....         | 2  | 0 | S01 |
| .....uccgaauucagcuuugucuaCg.....        | 1  | 0 | S01 |
| .....uccgaauucagcuuugucuaCgaac.....     | 1  | 0 | S01 |
| .....uccgaauucagcuuugucuaCgaaca.....    | 2  | 0 | S01 |
| .....ccgaauucagcuuugucua.....           | 2  | 0 | S01 |
| .....ccgaauucagcuuugucuaCgaaca.....     | 1  | 0 | S01 |
| .....ccgaauucagcuuugucuaCgaacaa.....    | 2  | 0 | S01 |
| .....cgaauucagcuuugucuaCgaacaa.....     | 1  | 0 | S01 |
| .....agcuuugucuaCgaacaa.....            | 1  | 0 | S01 |
| .....uacgaacaaggaagcuuaagC.....         | 1  | 1 | S01 |
| .....cgaacaaggaagcuuaaguaaC.....        | 1  | 1 | S01 |
| .....acaagAaagcuuaagua.....             | 1  | 1 | S01 |
| .....caaggaagcuuaaguaugA.....           | 1  | 1 | S01 |
| .....aaUgaagcuuaaguaau.....             | 1  | 1 | S01 |
| .....Gaggaagcuuaaguaau.....             | 1  | 1 | S01 |
| .....aaggaagcuuaaAuaau.....             | 1  | 1 | S01 |
| .....aaggaagcuuaaaguaaA.....            | 2  | 1 | S01 |
| .....aaggaagcuuaaaguaU.....             | 2  | 1 | S01 |
| .....aaggaagcuuaaGguaau.....            | 1  | 1 | S01 |
| .....aaggaagcuuaaaguaaC.....            | 24 | 1 | S01 |
| .....aaggaagAuaaaguaau.....             | 1  | 1 | S01 |
| .....aaggaagcuuaaagCaa.....             | 1  | 1 | S01 |
| .....aaggaagcuuaaagGaa.....             | 2  | 1 | S01 |
| .....aaggaagCauaaguaau.....             | 1  | 1 | S01 |
| .....aUggaagcuuaaguaau.....             | 1  | 1 | S01 |

## Star

## Mature

uaugaagcgccauggauacaaguuauagccuuggaaugaaagacaaauuccgaaucagcuuuugucuacggaacaaggaagcuauaaguaaugcaacuaugaaucucaugggaga

|                                         |     |   |     |
|-----------------------------------------|-----|---|-----|
| .....aaggaAAcuuaaaguaau.....            | 1   | 1 | S01 |
| .....aagUaagcuuaaaguaau.....            | 1   | 1 | S01 |
| .....Uaggaagcuuaaaguaau.....            | 1   | 1 | S01 |
| .....aagAAagcuuaaaguaau.....            | 1   | 1 | S01 |
| .....aaggaagcuUuaaguaau.....            | 1   | 1 | S01 |
| .....aGggaagcuuaaaguaau.....            | 2   | 1 | S01 |
| .....aaggaCgcuaaaguaaag.....            | 1   | 1 | S01 |
| .....Gaggaagcuuaaaguaaag.....           | 1   | 1 | S01 |
| .....aaggaagcuuaaaguaaA.....            | 12  | 1 | S01 |
| .....aaggaagcuauGaguaaag.....           | 1   | 1 | S01 |
| .....aaggaagcuuaaaguGaug.....           | 2   | 1 | S01 |
| .....aaggaagcuGuaaaguaaag.....          | 1   | 1 | S01 |
| .....aaggaagcuuaaaguaaCg.....           | 2   | 1 | S01 |
| .....aaggaagGuuaaaguaaag.....           | 1   | 1 | S01 |
| .....aaggaAAcuuaaaguaaag.....           | 1   | 1 | S01 |
| .....aaggaagcuuaaaguaCug.....           | 1   | 1 | S01 |
| .....aaggaGgcuuaaaguaaagc.....          | 1   | 1 | S01 |
| .....aaggaagcGuaaaguaaagc.....          | 1   | 1 | S01 |
| .....aaggCagcuuaaaguaaagc.....          | 1   | 1 | S01 |
| .....aaggaagcCuaaaguaaagc.....          | 1   | 1 | S01 |
| .....aaggaagcuCuaaaguaaagc.....         | 1   | 1 | S01 |
| .....aaggaagcuuaaaguaaagU.....          | 79  | 1 | S01 |
| .....aaggaAAcuuaaaguaaagc.....          | 1   | 1 | S01 |
| .....aGggaagcuuaaaguaaagc.....          | 1   | 1 | S01 |
| .....aaggaagAuuaaaguaaagc.....          | 1   | 1 | S01 |
| .....Gaggaagcuuaaaguaaagc.....          | 2   | 1 | S01 |
| .....aaggaagGuuaaaguaaagc.....          | 1   | 1 | S01 |
| .....aaggaagcuuaaaguaaCgc.....          | 2   | 1 | S01 |
| .....aaggaagcuCaaguaaagc.....           | 1   | 1 | S01 |
| .....aaggaagcuuaaaguaaagA.....          | 285 | 1 | S01 |
| .....aaggaagcuGuaaaguaaagc.....         | 1   | 1 | S01 |
| .....aaggaagcuuaaaguGaug.....           | 2   | 1 | S01 |
| .....aaUgaagcuuaaaguaaagc.....          | 1   | 1 | S01 |
| .....aaggaagcuuaaGguaaagc.....          | 1   | 1 | S01 |
| .....Naggaagcuuaaaguaaagc.....          | 3   | 1 | S01 |
| .....aaggaagcuuaaaguaaagG.....          | 5   | 1 | S01 |
| .....aagUaagcuuaaaguaaagc.....          | 5   | 1 | S01 |
| .....aaggaagcuuaaCguaaagc.....          | 2   | 1 | S01 |
| .....aaggaagcuuaaaguaaAgc.....          | 1   | 1 | S01 |
| .....aaggaagcuuaaaguaGugca.....         | 1   | 1 | S01 |
| .....aaggaagcuuaaaguaaagcG.....         | 1   | 1 | S01 |
| .....aaggaagcuuaaaguaaagAa.....         | 16  | 1 | S01 |
| .....aaggaagcuuaaaguaaagAaa.....        | 1   | 1 | S01 |
| .....aaggaagcuuaaaguGaugcaac.....       | 1   | 1 | S01 |
| .....aaggaagcuuaaGguaaagcaac.....       | 1   | 1 | S01 |
| .....aaggaagcuuaaaguaGugcaac.....       | 1   | 1 | S01 |
| .....aGggaagcuuaaaguaaagcaacuaug.....   | 1   | 1 | S01 |
| .....aaggaagcuuaaaguaaagcaGcuaug.....   | 1   | 1 | S01 |
| .....aaggaagcuuaaaguaaagcaacuaCg.....   | 2   | 1 | S01 |
| .....aaggaagcuuaaaguaaagcaacuaA.....    | 1   | 1 | S01 |
| .....aaggaagcuuaaaguaUugcaacuaugaa..... | 1   | 1 | S01 |
| .....gaagcuuaaaguaaagcaacuaugaaC.....   | 1   | 1 | S01 |
| .....cuuaaaguaaagcaacuaugaaC.....       | 1   | 1 | S01 |
| .....auaaguaauAcaacuaugaaucucau.....    | 1   | 1 | S01 |
| .....aaguaaagcaacuaugaGucu.....         | 1   | 1 | S01 |
| .....aaguaaagcGacuaugaaucu.....         | 1   | 1 | S01 |
| .....agGaaugcaacuaugaaucu.....          | 1   | 1 | S01 |
| .....guaaagcaacuaugaaucucaC.....        | 1   | 1 | S01 |
| .....uaaagcaacuaugaaucuC.....           | 1   | 1 | S01 |
| .....uaaagcaacuaugaaucucaG.....         | 1   | 1 | S01 |
| .....uaaagcaacuaugaaucucaC.....         | 2   | 1 | S01 |
| .....augcaacuaugaaucucaC.....           | 1   | 1 | S01 |
| .....ugcaacuaugaaucucaC.....            | 1   | 1 | S01 |
| .....gcaacuaugaaucucauU.....            | 1   | 1 | S01 |
| .....gcaacuaugaaucucauggaA.....         | 1   | 1 | S01 |
| .....acaaguuauagccuuggaauGaaagac.....   | 1   | 1 | S02 |
| .....aguuaagccuuggaauGaaagac.....       | 1   | 1 | S02 |
| .....guuaagccuugCaaugaaa.....           | 1   | 1 | S02 |
| .....augaagacaguuccgaa.....             | 1   | 1 | S02 |

## Star

## Mature

uaugaagcgcauggauacaaguuagccuuggaauaaaagacaauuccgaauccagcguuugucuaacgaacaagggaagcuauaaguaaagcacaugaaucaucgaggaga

|                                        |   |   |     |
|----------------------------------------|---|---|-----|
| .....augaaagacaauuccgaaA.....          | 1 | 1 | S02 |
| .....augaaagacaauuccgaaC.....          | 1 | 1 | S02 |
| .....augaaagacaauuccgaaucA.....        | 2 | 0 | S02 |
| .....augaaagacaauuccgaaucag.....       | 2 | 0 | S02 |
| .....augaaagacaauuccgaaucagc.....      | 1 | 0 | S02 |
| .....augaaagacaauuccgaaucagcu.....     | 1 | 0 | S02 |
| .....augaaagacaauuccgaaucagcuu.....    | 1 | 0 | S02 |
| .....augaaagacaauuccgaaucagcuuug.....  | 2 | 0 | S02 |
| .....ugaaagacaauuccgaaC.....           | 1 | 1 | S02 |
| .....ugaaagacaauuccgaaucA.....         | 2 | 0 | S02 |
| .....ugaaagacaauuccgaaucag.....        | 1 | 0 | S02 |
| .....ugaaagacaauuccgaaucagc.....       | 2 | 0 | S02 |
| .....ugaaagacaauuccgaauiagcu.....      | 1 | 1 | S02 |
| .....ugaaagacaauuccgaaucagcG.....      | 2 | 1 | S02 |
| .....ugaaagacaauuccgaaucagcu.....      | 2 | 0 | S02 |
| .....ugaaagacaauuccgaaucagcuuug.....   | 1 | 0 | S02 |
| .....gaaagacaauuccgaaucA.....          | 1 | 0 | S02 |
| .....gaaagacaauuccgaaucagcC.....       | 1 | 1 | S02 |
| .....aaagacaauuccgaaucA.....           | 2 | 0 | S02 |
| .....aaagacaauuccgaaucag.....          | 2 | 0 | S02 |
| .....aaagacaauuccgaaucagU.....         | 1 | 1 | S02 |
| .....aaagacaauuccgaaucagc.....         | 2 | 0 | S02 |
| .....aaagacaauuccgaaucagcu.....        | 4 | 0 | S02 |
| .....aaagacaauuccgaaucagcuG.....       | 1 | 1 | S02 |
| .....Gaagacaauuccgaaucagcuu.....       | 1 | 1 | S02 |
| .....aaagacaauuccgaaucagcuu.....       | 2 | 0 | S02 |
| .....aaagacaauuccgaaucagcuuug.....     | 1 | 0 | S02 |
| .....aGgacaauuccgaaucag.....           | 1 | 1 | S02 |
| .....aagacaauuccgaaucagc.....          | 4 | 0 | S02 |
| .....aagacaauuccgaaucagcu.....         | 1 | 0 | S02 |
| .....aagacaauuccgaauiagcu.....         | 1 | 1 | S02 |
| .....aagacaauuccgaaucagcuuu.....       | 2 | 0 | S02 |
| .....aagacaauuccgaaucagcuuug.....      | 1 | 0 | S02 |
| .....agacaauuccgaaucagc.....           | 2 | 0 | S02 |
| .....agacaCuuuccgaaucagc.....          | 1 | 1 | S02 |
| .....agacaauuccgaaucagcu.....          | 1 | 0 | S02 |
| .....agacaauuccgaaucagcuuuU.....       | 1 | 1 | S02 |
| .....gacaauuccgaaucagcu.....           | 1 | 0 | S02 |
| .....acaauuccgaaucagcuuug.....         | 2 | 0 | S02 |
| .....acaauuccgaauiagcuuugucuaC.....    | 1 | 1 | S02 |
| .....caauuccgaaucagcuuugucC.....       | 1 | 1 | S02 |
| .....caauuccgaaucagcuuugucu.....       | 1 | 0 | S02 |
| .....caauuccgaaucagcuuugucua.....      | 2 | 0 | S02 |
| .....caauuccgaaucagcuuugucuaCgaac..... | 1 | 0 | S02 |
| .....aaauuccgaaucagcuuug.....          | 1 | 0 | S02 |
| .....aaauuccgaauiagcuuugu.....         | 1 | 1 | S02 |
| .....aaauuccgaaucagcuuugu.....         | 1 | 0 | S02 |
| .....aaauuccgaaucagcuuugG.....         | 1 | 1 | S02 |
| .....aaauuccgaaucagcuuuguc.....        | 1 | 0 | S02 |
| .....aaauuccgaaucagcuuugucu.....       | 2 | 0 | S02 |
| .....aaauuccgaaucagcuuugucua.....      | 1 | 0 | S02 |
| .....aaauuccgaaucagcuuugucuaC.....     | 1 | 0 | S02 |
| .....aaauuccgaaucagcuuugu.....         | 3 | 0 | S02 |
| .....auuccgaaucagcuuugC.....           | 1 | 1 | S02 |
| .....auuccgaaucagcuuugucG.....         | 1 | 1 | S02 |
| .....auuccgaaucagcuuugucuaU.....       | 1 | 1 | S02 |
| .....auuccgaaucagcuuugucuaC.....       | 2 | 0 | S02 |
| .....auuccgaaucagcuuugucuaCga.....     | 1 | 0 | S02 |
| .....auuccgaaucagcuuugucuaCgaac.....   | 3 | 0 | S02 |
| .....uuccgaaucagcuuuguc.....           | 1 | 0 | S02 |
| .....uuccUaaucagcuuugucu.....          | 1 | 1 | S02 |
| .....uuccgaaucagcuuugucuaCgaac.....    | 2 | 0 | S02 |
| .....uuccgaaucagcuuugucuaCgaauU.....   | 1 | 1 | S02 |
| .....uuccgaaucagcuuugucuaCgaaca.....   | 1 | 0 | S02 |
| .....uuccgaaucagcuuugucu.....          | 1 | 0 | S02 |
| .....uuccgaaucagcuuugucCa.....         | 1 | 1 | S02 |
| .....uuccgaaucagcuuugucua.....         | 1 | 0 | S02 |
| .....ccgaaucagcuuugucuaC.....          | 1 | 0 | S02 |
| .....ccgaaucagcuuugucuaCgaac.....      | 4 | 0 | S02 |
| .....ccgaaucagGuuugucuaCgaaca.....     | 1 | 1 | S02 |



## Star

## Mature

uaugaagcgcauggauacaaguuauugccuuggaauagaaagacaaauccgaauacagcuuugucuaacgaacaaaggaagcuauaaguaaagcacaacuaugaaucuaggaga

|                                         |    |   |     |
|-----------------------------------------|----|---|-----|
| .....cgaaucagcuuugucuaacgaaU.....       | 1  | 1 | S02 |
| .....aaucagcuuugucuaacgaacaag.....      | 1  | 0 | S02 |
| .....auUagcuuugucuaacgaacaaggaagcu..... | 1  | 1 | S02 |
| .....cagcuuugulUuacgaacaa.....          | 1  | 1 | S02 |
| .....ugucuaacgaacaaggaagcC.....         | 1  | 1 | S02 |
| .....ucuaacgaacaaggaagcuauaagcC.....    | 1  | 1 | S02 |
| .....acgaacaaggaUgcuaauaaguaau.....     | 1  | 1 | S02 |
| .....cgaacaaggaagcuauaagcC.....         | 1  | 1 | S02 |
| .....cGaggaagcuauaaguaaag.....          | 1  | 1 | S02 |
| .....aaggGagcuauaaguaau.....            | 1  | 1 | S02 |
| .....aaCgaagcuauaaguaau.....            | 1  | 1 | S02 |
| .....aaggaagcuGuaaguaau.....            | 1  | 1 | S02 |
| .....aaggaagcuauGaguaau.....            | 1  | 1 | S02 |
| .....aaggaagcuauaaguaaC.....            | 3  | 1 | S02 |
| .....aagUaagcuauaaguaau.....            | 1  | 1 | S02 |
| .....aagCaagcuauaaguaau.....            | 1  | 1 | S02 |
| .....aGggaagcuauaaguaau.....            | 1  | 1 | S02 |
| .....aaggaagcuauaaguaaA.....            | 1  | 1 | S02 |
| .....aaggaagcuauaaguaaGu.....           | 2  | 1 | S02 |
| .....aaggaGgcuaauaaguaau.....           | 1  | 1 | S02 |
| .....aaggaagcGauaaguaau.....            | 1  | 1 | S02 |
| .....aaggaagcuauaaguaaG.....            | 1  | 1 | S02 |
| .....aaggaagGuauaaguaau.....            | 1  | 1 | S02 |
| .....aagCaagcuauaaguaaag.....           | 1  | 1 | S02 |
| .....aaggaagcuauaCguaaag.....           | 1  | 1 | S02 |
| .....Naggaagcuauaaguaaag.....           | 1  | 1 | S02 |
| .....aaggaagcuauCaguaaag.....           | 1  | 1 | S02 |
| .....aagUaagcuauaaguaaag.....           | 1  | 1 | S02 |
| .....aaggaGgcuaauaaguaaag.....          | 1  | 1 | S02 |
| .....aaggaagcuauaaguaaCg.....           | 2  | 1 | S02 |
| .....aaggaagcuauaaguaaGg.....           | 1  | 1 | S02 |
| .....aaggaagcuauaaguaaA.....            | 3  | 1 | S02 |
| .....aaggaagAuaaaguaaagcC.....          | 1  | 1 | S02 |
| .....NaggaagcuauaaguaaagcC.....         | 1  | 1 | S02 |
| .....aaggaagcuauaaguaaAgc.....          | 1  | 1 | S02 |
| .....aaggaagcuauaaguaaagA.....          | 38 | 1 | S02 |
| .....aaggaagcuuaagAaaagcC.....          | 1  | 1 | S02 |
| .....aaggaagcuauaaguaaagU.....          | 7  | 1 | S02 |
| .....aaggaagcuauaaguaaagG.....          | 4  | 1 | S02 |
| .....aaggaagcuauaaguaaagcG.....         | 2  | 1 | S02 |
| .....aaggaagcuGuaaguaaagca.....         | 1  | 1 | S02 |
| .....aaggaagcuauaaguaaagcC.....         | 1  | 1 | S02 |
| .....aaggaagcuauaaguaaagAa.....         | 4  | 1 | S02 |
| .....aagAaagcuauaaguaaagcaac.....       | 1  | 1 | S02 |
| .....aaggaagcuauaaguaaagcaau.....       | 2  | 1 | S02 |
| .....aaggaagcuauaaguaaagcaacG.....      | 1  | 1 | S02 |
| .....aaggaagcuAaaguaaagcaacu.....       | 1  | 1 | S02 |
| .....aaggaagcuauaagCaaugcaacuag.....    | 1  | 1 | S02 |
| .....aaggaagcuauaaguaaagcaacuauA.....   | 1  | 1 | S02 |
| .....aagUaagcuauaaguaaagcaacuagaa.....  | 1  | 1 | S02 |
| .....aaggaagcuauaaguaaagcaacuugaG.....  | 2  | 1 | S02 |
| .....aaggaagcuauaaguaaagcaacuagGa.....  | 1  | 1 | S02 |
| .....aaggaagcuUuaaguaaagcaacuugaa.....  | 1  | 1 | S02 |
| .....aGggaagcuauaaguaaagcaacuugaa.....  | 1  | 1 | S02 |
| .....agcuauaaguaaagcGacuugaa.....       | 1  | 1 | S02 |
| .....aaguaaagcaacuauaagaaucG.....       | 1  | 1 | S02 |
| .....aaguaaagcaacuauAaauucuau.....      | 1  | 1 | S02 |
| .....uaaagcaacuugaauucucGu.....         | 1  | 1 | S02 |
| .....uaaagcaacuugaauucucaC.....         | 1  | 1 | S02 |
| .....aaugcaacuugaauucucaC.....          | 1  | 1 | S02 |
| .....aaugcGacuugaauucucaug.....         | 1  | 1 | S02 |
| .....augcGacuugaauucucau.....           | 1  | 1 | S02 |
| .....augcaacuugaauucucaG.....           | 1  | 1 | S02 |
| .....ugcaacuugaauucucaC.....            | 1  | 1 | S02 |

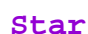[illegible]

Provisional ID : Maple\_Unigene\_BMK.35734\_178434  
Score total : 2.8  
Score for star read(s) : 3.9  
Score for read counts : -4.9  
Score for mfe : 0.9  
Score for randfold : 0  
Score for cons. seed : 3  
Total read count : 2  
Mature read count : 1  
Loop read count : 0  
Star read count : 1

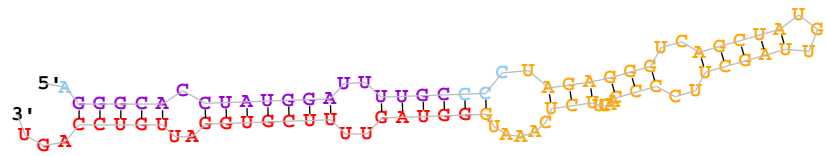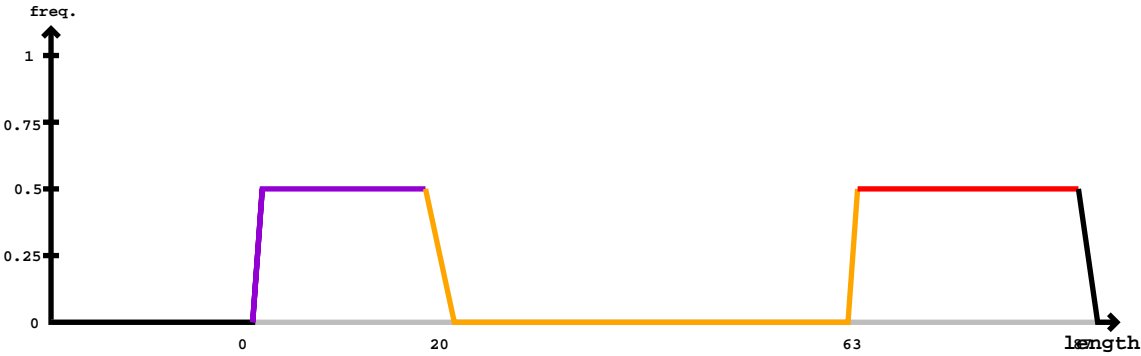

Star

Mature

|      |                    |                     |                                             |                              |     |       |    |        |
|------|--------------------|---------------------|---------------------------------------------|------------------------------|-----|-------|----|--------|
| 5' - | caugaauucuuuccagaa | gggcaccuauggauuuugc | cccuagagggucagcuauguuagcuuccccaacuucucaaaug | ggguaguuuucguggauuguccagucag | -3' | obs   |    |        |
|      | caugaauucuuuccagaa | gggcaccuauggauuuugc | cccuagagggucagcuauguuagcuuccccaacuucucaaaug | ggguaguuuucguggauuguccagucag |     | exp   |    |        |
|      | ..(((..(((.....))) | ..(((..(((.....)))  | ..(((..(((.....)))                          | ..(((..(((.....)))           |     | reads | mm | sample |
|      | .....              | .....               | .....                                       | .....                        |     | 1     | 0  | s02    |
|      | .....              | .....               | .....                                       | .....                        |     | 1     | 0  | s02    |

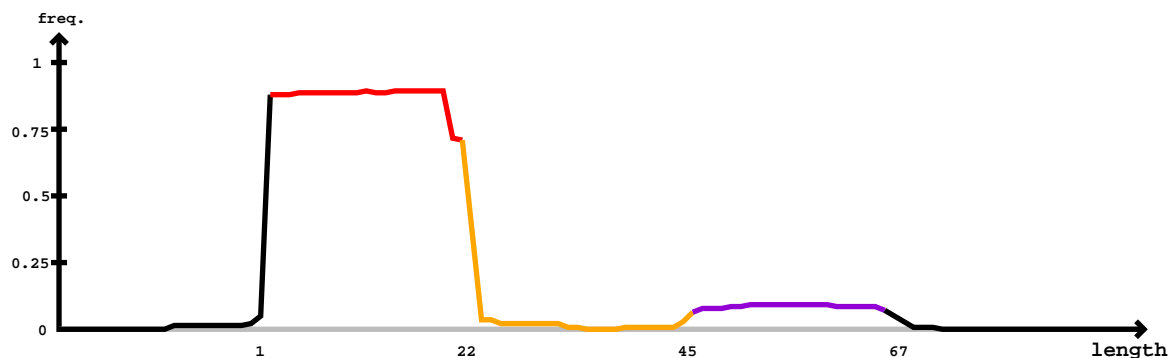

Star

[illegible]

Mature

Star

|                                                                                                                        |   |   |     |
|------------------------------------------------------------------------------------------------------------------------|---|---|-----|
| cuuaaagaauuaaaauaucacga <u>uucucuucaacucuuuaguuuaaacgcuuucaagcaaagcu</u> auccuauugaagaauuuugugccuuucaaaucagauucucucuau |   |   |     |
| .....uauccuauugaagaauuuug.....                                                                                         | 2 | 0 | S02 |
| .....uauccuauugaagaauuuugu.....                                                                                        | 1 | 0 | S02 |
| .....auccuauugaagaauuuugu.....                                                                                         | 3 | 0 | S02 |
| .....auccuauugaagaauuuuguc.....                                                                                        | 1 | 0 | S02 |
| .....uugaagaauuuugugccuu.....                                                                                          | 1 | 0 | S02 |

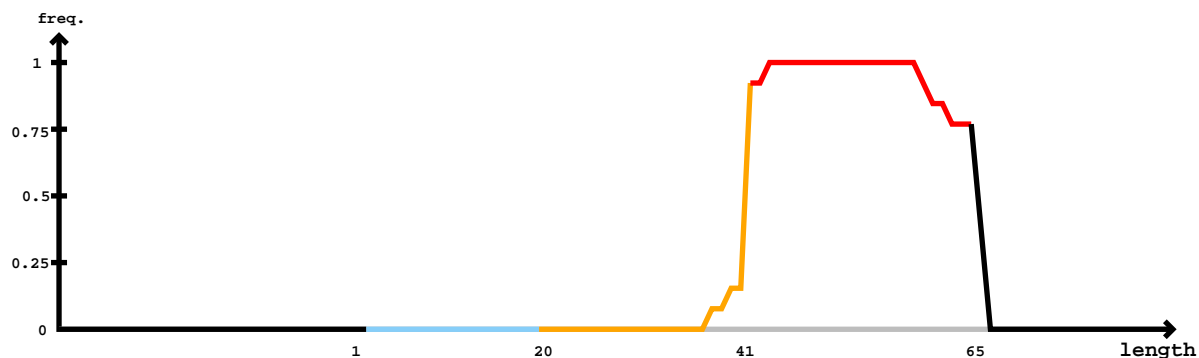

## Mature

[illegible]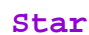

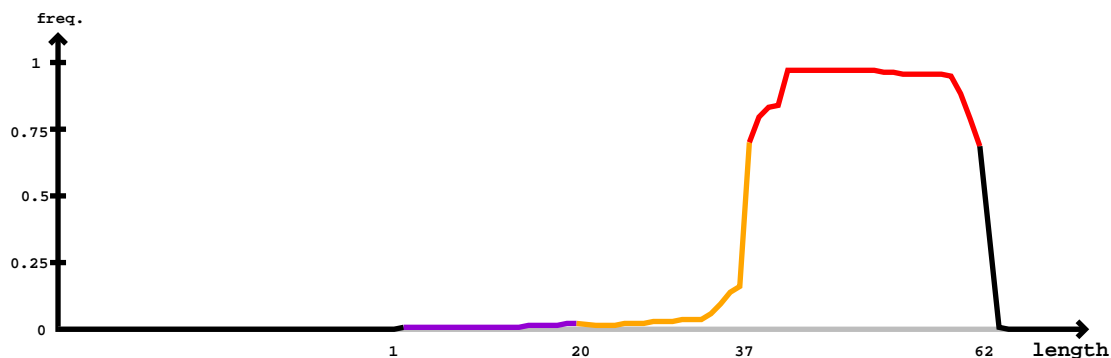

## Mature

| 5'                                                                                                                | -3' | obs | exp | reads | mm | sample |
|-------------------------------------------------------------------------------------------------------------------|-----|-----|-----|-------|----|--------|
| gguuugggcuuugggcagaaauuuuuucuaaagaagugagugaaauaucgauggcuuuuguuugaaaagcgaaacggacggcgaagugacuuugaucucacgcgggcuuaaua |     |     |     |       |    |        |
| gguuugggcuuugggcagaaauuuuuucuaaagaagugagugaaauaucgauggcuuuuguuugaaaagcgaaacggacggcgaagugacuuugaucucacgcgggcuuaaua |     |     |     |       |    |        |
| ...((((((((...((((...))))).(((((((...(((...((((((((...))))).)))...)))...)).).)))))...)))))))).                    |     |     |     |       |    |        |
| ...ugagugaaauaucgauggcu                                                                                           | 1   | 0   |     |       |    | S01    |
| ...auggcuuuuguugaaaagcgaacggacgg...                                                                               | 1   | 0   |     |       |    | S01    |
| ...cuuuuguugaaaagcgaacggacgg...                                                                                   | 1   | 0   |     |       |    | S01    |
| ...uugaaaagcgaacggacgg...                                                                                         | 1   | 0   |     |       |    | S01    |
| ...aaagcgaacggacggcgaagCgacu...                                                                                   | 1   | 1   |     |       |    | S01    |
| ...gcgaacggacggcgaagugacuuC...                                                                                    | 1   | 1   |     |       |    | S01    |
| ...aacggacggcgaagugacuuugaucucacA...                                                                              | 1   | 1   |     |       |    | S01    |
| ...aacggacggcgaagugacuuugaucucacU...                                                                              | 1   | 1   |     |       |    | S01    |
| ...aacggacggcgaagugacuuugaucucacg...                                                                              | 1   | 0   |     |       |    | S01    |
| ...acggacggcgaagugacuuugaucuca...                                                                                 | 1   | 0   |     |       |    | S01    |
| ...acggacggcgaagugacuuugaucucac...                                                                                | 2   | 0   |     |       |    | S01    |
| ...acggacggcgaagugacuuugaucucacA...                                                                               | 1   | 1   |     |       |    | S01    |
| ...acggacggcgaagugacuuugaucucacU...                                                                               | 1   | 1   |     |       |    | S01    |
| ...cggaacggcgaagugacuuugaucuuAa...                                                                                | 1   | 1   |     |       |    | S01    |
| ...cggaacggcgaagugacuuugaucucacC...                                                                               | 3   | 1   |     |       |    | S01    |
| ...cggaacggcgaagugacuuugaucucacA...                                                                               | 1   | 1   |     |       |    | S01    |
| ...Cgaacggcgaagugacuuugaucucac...                                                                                 | 1   | 1   |     |       |    | S01    |
| ...ggacggcgaagugacuuugaucucacA...                                                                                 | 1   | 1   |     |       |    | S01    |
| ...ggacggcgaagugacuuugaucucacU...                                                                                 | 1   | 1   |     |       |    | S01    |
| ...gacggcgaagugacuuugaucuuU...                                                                                    | 1   | 1   |     |       |    | S01    |
| ...gacggcgaagugacuuugaucuc...                                                                                     | 4   | 0   |     |       |    | S01    |
| ...gacggcgaagugacuuugaCcuca...                                                                                    | 1   | 1   |     |       |    | S01    |
| ...gacggcgaagugacuuugaucuca...                                                                                    | 1   | 0   |     |       |    | S01    |
| ...gaUggcgaagugacuuugaucucac...                                                                                   | 1   | 1   |     |       |    | S01    |
| ...gacggcgaagugacuuugaucucac...                                                                                   | 1   | 0   |     |       |    | S01    |
| ...gacggcgaagugacuuugaucucCc...                                                                                   | 1   | 1   |     |       |    | S01    |
| ...gacggcgaagugacuuugaucucacC...                                                                                  | 16  | 1   |     |       |    | S01    |
| ...gacggcgaagugacuuugaucucacU...                                                                                  | 3   | 1   |     |       |    | S01    |
| ...gacggcgaagugacuuugaucucacA...                                                                                  | 9   | 1   |     |       |    | S01    |
| ...gacggcgaagugacuuugaucucacg...                                                                                  | 3   | 0   |     |       |    | S01    |
| ...gacggcgaagugacuuugaucucacgc...                                                                                 | 1   | 0   |     |       |    | S01    |
| ...acggcgaagugacuuugaucu...                                                                                       | 1   | 0   |     |       |    | S01    |
| ...acggcgaagugacuuugaucucCc...                                                                                    | 1   | 1   |     |       |    | S01    |



## Star

## Mature

|                                                                                                            |   |   |     |
|------------------------------------------------------------------------------------------------------------|---|---|-----|
| gguuggggcuugggcagaaauuuuuucuaaagaagugagugaauaucgauggcuuuuguugaagcgaaacggacggcaagugacuuugaucucacgcgggcuuaua |   |   |     |
| .....acggcaagugacuuugaucucacU.....                                                                         | 1 | 1 | S01 |
| .....acggcaagugacuuugaucucacC.....                                                                         | 5 | 1 | S01 |
| .....acggcaagugacuuugaucucacA.....                                                                         | 2 | 1 | S01 |
| .....cggcaagugacuuugaucucC.....                                                                            | 1 | 1 | S01 |
| .....cggcaagugacuuugaucucacg.....                                                                          | 2 | 0 | S01 |
| .....ggcaagugacuuugaucucCc.....                                                                            | 1 | 1 | S01 |
| .....gcaagugacuuugaucucC.....                                                                              | 1 | 1 | S01 |
| .....gcaagugacuuugaucucacg.....                                                                            | 1 | 0 | S01 |
| .....gcaagugacuuugaucucacA.....                                                                            | 1 | 1 | S01 |
| .....gcaagugacuuugaucucacU.....                                                                            | 2 | 1 | S01 |
| .....gcaagugacuuugaucucacC.....                                                                            | 3 | 1 | S01 |
| .....gcaagugacuuugaucucacgU.....                                                                           | 1 | 1 | S01 |
| .....gcaagugacuuugaucucacgc.....                                                                           | 1 | 0 | S01 |
| .....caagugacuuugaucucacA.....                                                                             | 1 | 1 | S01 |
| .....cggacggcaagugacuuugaucucacC.....                                                                      | 1 | 1 | S02 |
| .....gacggcaagugacuuugaucuc.....                                                                           | 1 | 0 | S02 |
| .....gacggcaagAgacuuugaucuc.....                                                                           | 1 | 1 | S02 |
| .....gacggcaagugacuuugaucuA.....                                                                           | 1 | 1 | S02 |
| .....gacggcaagugacuuugaucucC.....                                                                          | 3 | 1 | S02 |
| .....gacggcaagugacuuugaucuca.....                                                                          | 2 | 0 | S02 |
| .....gacggcaagugacuuugaucucaA.....                                                                         | 1 | 1 | S02 |
| .....gacggcaagugCcuuugaucucac.....                                                                         | 1 | 1 | S02 |
| .....gacggAaagugacuuugaucucac.....                                                                         | 1 | 1 | S02 |
| .....gacggcaagugacuuugaucucac.....                                                                         | 3 | 0 | S02 |
| .....gacggcaagugacuuugaucucacC.....                                                                        | 7 | 1 | S02 |
| .....gacggcaagugacuuugaucucacA.....                                                                        | 5 | 1 | S02 |
| .....gacggcaagugacuuugaucucacg.....                                                                        | 4 | 0 | S02 |
| .....gacggUaagugacuuugaucucacg.....                                                                        | 1 | 1 | S02 |
| .....gUcggcaagugacuuugaucucacgcg.....                                                                      | 1 | 1 | S02 |
| .....acggcaagugacuuugaucucacC.....                                                                         | 2 | 1 | S02 |
| .....acggcaagugacuuugaucucacA.....                                                                         | 1 | 1 | S02 |
| .....cggcaagugacuuugaucucacg.....                                                                          | 1 | 0 | S02 |
| .....cggcaagugacuuugaucucacgc.....                                                                         | 1 | 0 | S02 |
| .....gcaagugacuuugaucuc.....                                                                               | 1 | 0 | S02 |
| .....gcaagugacuuugaucucacC.....                                                                            | 6 | 1 | S02 |
| .....gcaagugacuuugaucucacU.....                                                                            | 1 | 1 | S02 |
| .....caagugacuuugaucuca.....                                                                               | 2 | 0 | S02 |

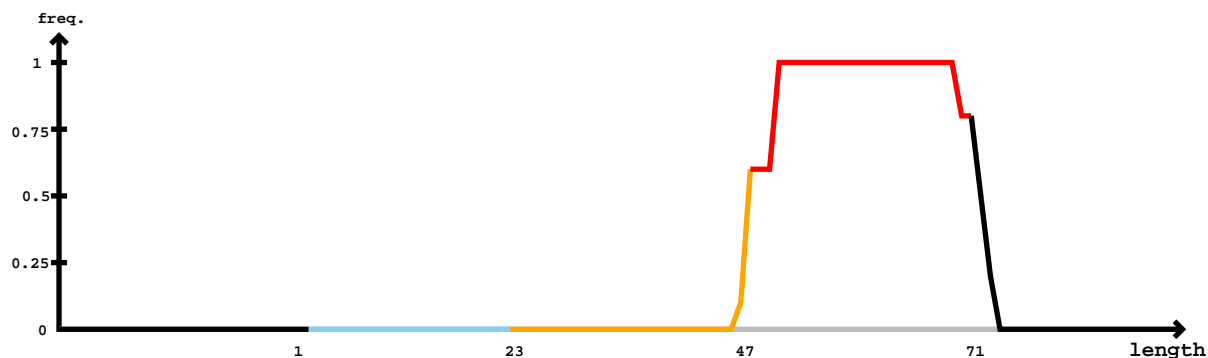

## Mature

[illegible]

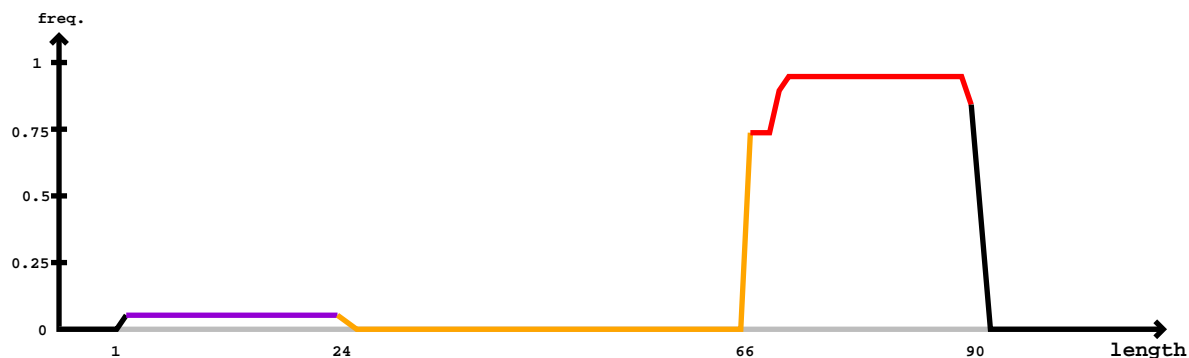

## Mature

[illegible]

[illegible]

5' UGACAG GA GAGAGUGAGCACA CGCAGCGGAAAUUUUUGUAUGUAGAA 3'

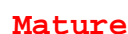

## Star

## Mature

|                                  |                                                                                  |     |   |     |
|----------------------------------|----------------------------------------------------------------------------------|-----|---|-----|
| gacugacaggagagagugagcaca         | cgacagggaauuuguuagagaaaguuacacuuuuugacuugugugugcucacuuccucugucagcucagcucaaccaacu |     |   |     |
| ...ugGcaggagagagugagcaca         |                                                                                  | 2   | 1 | S01 |
| ...ugacaggGgagagugagcaca         |                                                                                  | 1   | 1 | S01 |
| ...ugaUaggagagagugagcaca         |                                                                                  | 2   | 1 | S01 |
| ...ugacagggaUagagugagcaca        |                                                                                  | 1   | 1 | S01 |
| ...ugacaggagagagAgagcaca         |                                                                                  | 1   | 1 | S01 |
| ...ugacaggagagagugagUaca         |                                                                                  | 1   | 1 | S01 |
| ...ugacaggagagagugagcaca         |                                                                                  | 296 | 0 | S01 |
| ...ugacaggagagagugaAacaca        |                                                                                  | 1   | 1 | S01 |
| ...ugaGaggagagagugagcaca         |                                                                                  | 1   | 1 | S01 |
| ...ugacaAagagagagugagcaca        |                                                                                  | 1   | 1 | S01 |
| ...ugacaggagagagGgagcaca         |                                                                                  | 1   | 1 | S01 |
| ...ugacaggagagagugagcacU         |                                                                                  | 6   | 1 | S01 |
| ...Ggacaggagagagugagcaca         |                                                                                  | 1   | 1 | S01 |
| ...Cgacaggagagagugagcaca         |                                                                                  | 2   | 1 | S01 |
| ...ugacaggagagagugGgcaca         |                                                                                  | 1   | 1 | S01 |
| ...ugacaggagagagCgagcaca         |                                                                                  | 1   | 1 | S01 |
| ...ugacaggagagagugagcacaA        |                                                                                  | 1   | 1 | S01 |
| ...ugacaggagagagugagcacaU        |                                                                                  | 1   | 1 | S01 |
| ...ugacaggagagagugagcacac        |                                                                                  | 1   | 0 | S01 |
| ...ugacaggagagagugagcacaG        |                                                                                  | 1   | 1 | S01 |
| ...ugacaggagagagugagcacagU       |                                                                                  | 1   | 1 | S01 |
| ...ugacaggagagagugagcacaGgc      |                                                                                  | 1   | 1 | S01 |
| ...gacaggagagagugagca            |                                                                                  | 1   | 0 | S01 |
| ...acaggagagagugGgcaca           |                                                                                  | 1   | 1 | S01 |
| ...uuugacuugugugugcucacuucu      |                                                                                  | 1   | 0 | S01 |
| ...uugacuugugugugcucacuuc        |                                                                                  | 1   | 0 | S01 |
| ...uugacuugugugugcucacuucu       |                                                                                  | 3   | 0 | S01 |
| ...uugacuugugugugUacacuucuc      |                                                                                  | 1   | 1 | S01 |
| ...uugacuugugugugcucacuucuU      |                                                                                  | 3   | 1 | S01 |
| ...uugacuugugugugcucacuucuc      |                                                                                  | 2   | 0 | S01 |
| ...gacuugugugugcucacuuccu        |                                                                                  | 1   | 0 | S01 |
| ...uugugugugcucacuuccuuccugucagc |                                                                                  | 1   | 0 | S01 |
| ...Agugugcucacuuccuuccugucagc    |                                                                                  | 1   | 1 | S01 |
| ...ugugcucacuuccuuccuguc         |                                                                                  | 2   | 0 | S01 |
| ...ugugcucacuuccuuccugU          |                                                                                  | 1   | 1 | S01 |
| ...ugugcucacuuccuuccugCc         |                                                                                  | 1   | 1 | S01 |
| ...ugugcucacuuccuuccugucG        |                                                                                  | 1   | 1 | S01 |
| ...ugugcucacuuccuuccuguca        |                                                                                  | 1   | 0 | S01 |
| ...gugcucacuuccuuccuguc          |                                                                                  | 1   | 1 | S01 |
| ...gugcucacuuccuuccuguc          |                                                                                  | 13  | 0 | S01 |
| ...gugcucacuuccuuccuguc          |                                                                                  | 1   | 1 | S01 |
| ...gugcucacuuccuuccuguca         |                                                                                  | 2   | 0 | S01 |
| ...gugcucacuuccuuccuguca         |                                                                                  | 1   | 1 | S01 |
| ...gugcucacuuccuuccugucag        |                                                                                  | 37  | 0 | S01 |
| ...Augcucacuuccuuccugucag        |                                                                                  | 1   | 1 | S01 |
| ...gugcucacuuccuuccugucaA        |                                                                                  | 2   | 1 | S01 |
| ...guAcucacuuccuuccugucag        |                                                                                  | 1   | 1 | S01 |
| ...gugcucGcuuccuuccugucag        |                                                                                  | 1   | 1 | S01 |
| ...gugcucacuuccuuccugucag        |                                                                                  | 1   | 1 | S01 |
| ...ugcucacuuccuuccugU            |                                                                                  | 4   | 0 | S01 |
| ...uUcucacuuccuuccuguc           |                                                                                  | 1   | 1 | S01 |
| ...ugcucacuuccuuccuguc           |                                                                                  | 97  | 0 | S01 |
| ...ugcucacuuccuuccugU            |                                                                                  | 13  | 1 | S01 |
| ...ugcGcacuuccuuccuguc           |                                                                                  | 1   | 1 | S01 |
| ...ugcucacuuccuuccugua           |                                                                                  | 1   | 1 | S01 |
| ...ugcucacuuccuuccuguc           |                                                                                  | 1   | 1 | S01 |
| ...ugcucacuuccuuccuguc           |                                                                                  | 1   | 1 | S01 |
| ...ugcucacuuccuuccuguc           |                                                                                  | 1   | 1 | S01 |
| ...ugcucacuuccuuccugucG          |                                                                                  | 1   | 1 | S01 |
| ...ugcucacuuccuuccuguca          |                                                                                  | 4   | 0 | S01 |
| ...ugcucacuuccuuccugucaA         |                                                                                  | 3   | 1 | S01 |
| ...ugcucacuuccuuccugucag         |                                                                                  | 23  | 0 | S01 |
| ...ugcucacuUuccuuccugucag        |                                                                                  | 1   | 1 | S01 |
| ...ugcGcacuuccuuccugucagc        |                                                                                  | 1   | 1 | S01 |
| ...ugcucacuuccuuccugAcagc        |                                                                                  | 1   | 1 | S01 |
| ...ugcucacuuccuuccuguaAgc        |                                                                                  | 1   | 1 | S01 |
| ...ugcucacuuccuuccugucagc        |                                                                                  | 2   | 1 | S01 |
| ...Ggcucacuuccuuccugucagc        |                                                                                  | 2   | 1 | S01 |
| ...ugcucacuuccuuccugucagc        |                                                                                  | 3   | 1 | S01 |
| ...ugUcacuuccuuccugucagc         |                                                                                  | 1   | 1 | S01 |

## Star

## Mature

gacugacaggagagagugagcaca~~cg~~caggga~~aa~~uu~~u~~gu~~a~~ugag~~aa~~gu~~a~~uacacuuuu~~u~~gacuu~~g~~ugugugucacuu~~u~~ccucucugucagcucagcucaaccaacu

|                                    |     |   |     |
|------------------------------------|-----|---|-----|
| .....ugcuUacuucuccucugucagc.....   | 2   | 1 | S01 |
| .....uUcucacuuuccucugucagc.....    | 1   | 1 | S01 |
| .....uCcucacuuuccucugucagc.....    | 2   | 1 | S01 |
| .....ugcucacuuuccucugucGgc.....    | 3   | 1 | S01 |
| .....ugcucacuuuccucugucagG.....    | 3   | 1 | S01 |
| .....ugcucacuuuccucCgucagc.....    | 4   | 1 | S01 |
| .....ugcucacuuuccucugucUgc.....    | 1   | 1 | S01 |
| .....ugcucacCucuccucugucagc.....   | 2   | 1 | S01 |
| .....ugcucacuGcuccucugucagc.....   | 1   | 1 | S01 |
| .....ugcucacuuAccucugucagc.....    | 1   | 1 | S01 |
| .....ugcucacuCcuccucugucagc.....   | 3   | 1 | S01 |
| .....ugcAcacuuuccucugucagc.....    | 1   | 1 | S01 |
| .....ugcucGcuuccucugucagc.....     | 1   | 1 | S01 |
| .....ugcucacuuuccucugucagc.....    | 758 | 0 | S01 |
| .....ugcucacuuuccAcugucagc.....    | 1   | 1 | S01 |
| .....ugcucacuuCcucugucagc.....     | 2   | 1 | S01 |
| .....Ngcucacuuuccucugucagc.....    | 1   | 1 | S01 |
| .....ugcucacuuuccucugGcagc.....    | 1   | 1 | S01 |
| .....ugcucacuuuccucugGagc.....     | 1   | 1 | S01 |
| .....ugcucacuuUuccucugucagc.....   | 1   | 1 | S01 |
| .....uAcucacuuuccucugucagc.....    | 4   | 1 | S01 |
| .....ugcuGacuuccucugucagc.....     | 1   | 1 | S01 |
| .....ugcucacuuuccucugucagA.....    | 27  | 1 | S01 |
| .....ugGucacuuuccucugucagc.....    | 3   | 1 | S01 |
| .....ugcucaAuuccucucugucagc.....   | 1   | 1 | S01 |
| .....ugcucacuuAuuccucugucagc.....  | 3   | 1 | S01 |
| .....ugcucacuuuccuAugucagc.....    | 1   | 1 | S01 |
| .....ugcucacuuuccuGugucagc.....    | 3   | 1 | S01 |
| .....ugcucacuuGcucugucagc.....     | 1   | 1 | S01 |
| .....ugcucacuAcuccucugucagc.....   | 1   | 1 | S01 |
| .....ugcucacuuuccCcugucagc.....    | 4   | 1 | S01 |
| .....ugcucacAuuccucugucagc.....    | 1   | 1 | S01 |
| .....ugcucacuuGuccucugucagc.....   | 2   | 1 | S01 |
| .....Cgcucacuuuccucugucagc.....    | 1   | 1 | S01 |
| .....ugcucacuuuccucugucagU.....    | 141 | 1 | S01 |
| .....ugcCcacuuuccucugucagc.....    | 1   | 1 | S01 |
| .....ugcucacuuuccucugucagcu.....   | 2   | 0 | S01 |
| .....ugcucacuuuccucugucagcA.....   | 1   | 1 | S01 |
| .....ugcucacuuuccucugucagcAca..... | 1   | 1 | S01 |
| .....gcucacuuuccucuguca.....       | 1   | 0 | S01 |
| .....ucacuuuccucugucagc.....       | 1   | 0 | S01 |
| .....cacuuuccucugucagc.....        | 1   | 0 | S01 |
| ..Uugacaggagagagugagca.....        | 1   | 1 | S02 |
| ..Uugacaggagagagugagcac.....       | 4   | 1 | S02 |
| ..cugacagAagagagugagcac.....       | 3   | 1 | S02 |
| ..ugacaggagagagugagc.....          | 41  | 0 | S02 |
| ..ugacaggCgagagugagc.....          | 1   | 1 | S02 |
| ..ugacaggagGgagugagc.....          | 1   | 1 | S02 |
| ..ugacaggagagagugagU.....          | 5   | 1 | S02 |
| ..ugacaggagagagGgagc.....          | 2   | 1 | S02 |
| ..ugacaggagagagCgagc.....          | 1   | 1 | S02 |
| ..ugacaggagagagugagca.....         | 10  | 0 | S02 |
| ..ugacaggagagagugagcG.....         | 3   | 1 | S02 |
| ..ugacaggagagagGgagcac.....        | 2   | 1 | S02 |
| ..ugacaggagagagugagcUc.....        | 1   | 1 | S02 |
| ..ugacaggagagUgugagcac.....        | 1   | 1 | S02 |
| ..ugacaggagagugagcGc.....          | 1   | 1 | S02 |
| ..ugacagCagagagugagcac.....        | 3   | 1 | S02 |
| ..ugacaggagagagugCgcac.....        | 2   | 1 | S02 |
| ..ugacaggagagagugagcac.....        | 120 | 0 | S02 |
| ..ugacaggagagagugagcaU.....        | 16  | 1 | S02 |
| ..ugacaggaCagagugagcac.....        | 1   | 1 | S02 |
| ..ugacaggagGgagugagcac.....        | 2   | 1 | S02 |
| ..ugaAagagagagugagcac.....         | 1   | 1 | S02 |
| ..ugacaggagagagAgagcac.....        | 1   | 1 | S02 |
| ..ugGcaggagagagugagcac.....        | 1   | 1 | S02 |
| ..ugacaggagagagCgagcac.....        | 2   | 1 | S02 |
| ..ugacaggagagaCugagcac.....        | 1   | 1 | S02 |
| ..ugacaCgagagagugagcaca.....       | 1   | 1 | S02 |

## Star

## Mature

gacugacaggagagagugagcaca cgcagggaauuuguuagagaaaguuacacuuuuugacuugugugugucacuuuccucugucagcucagcucaaccaacu

|                                 |     |   |     |
|---------------------------------|-----|---|-----|
| ...ugacaggagagagCgagcaca.....   | 3   | 1 | S02 |
| ...ugacaggagGgagugagcaca.....   | 2   | 1 | S02 |
| ...ugacaggagagagAgagcaca.....   | 4   | 1 | S02 |
| ...ugacaggGgagagugagcaca.....   | 2   | 1 | S02 |
| ...ugacaggagagagugagcacC.....   | 7   | 1 | S02 |
| ...ugacaggagagagGgagcaca.....   | 3   | 1 | S02 |
| ...Cgacaggagagagugagcaca.....   | 1   | 1 | S02 |
| ...ugacaggagagagugagcacG.....   | 33  | 1 | S02 |
| ...uAacaggagagagugagcaca.....   | 1   | 1 | S02 |
| ...ugacaggagagagugagcaca.....   | 277 | 0 | S02 |
| ...Ggacaggagagagugagcaca.....   | 1   | 1 | S02 |
| ...ugacaggagagUgugagcaca.....   | 1   | 1 | S02 |
| ...ugacaggagagagugagcacU.....   | 2   | 1 | S02 |
| ...ugacaggUgagagugagcaca.....   | 1   | 1 | S02 |
| ...ugacaggagagagugaAcaca.....   | 1   | 1 | S02 |
| ...ugacaggagagagugGgcaca.....   | 3   | 1 | S02 |
| ...gacaggagagagugagcaca.....    | 1   | 0 | S02 |
| ...acagAagagagugagcacacg.....   | 1   | 1 | S02 |
| ...caggagagagugagcacacC.....    | 1   | 1 | S02 |
| ...uugacuugugugugucacuuuc.....  | 1   | 0 | S02 |
| ...uugacuugugGgugucacuuuc.....  | 1   | 1 | S02 |
| ...uugacuugugugugucacuuuc.....  | 1   | 0 | S02 |
| ...uugacuugugugugucacuuucU..... | 2   | 1 | S02 |
| ...uugacuugugCgugucacuuuc.....  | 1   | 1 | S02 |
| ...ugacuugugugugucacuuuc.....   | 1   | 0 | S02 |
| ...ugugucacuuuccucuguc.....     | 4   | 0 | S02 |
| ...ugugucacuuuccucuguca.....    | 3   | 0 | S02 |
| ...ugugucacuuuccucugucG.....    | 1   | 1 | S02 |
| ...gugucacuuuccucuguc.....      | 3   | 0 | S02 |
| ...gugucacuuuccucUguc.....      | 1   | 1 | S02 |
| ...gugucacuuuccucUucag.....     | 1   | 1 | S02 |
| ...gugucacuuuccucugucaA.....    | 2   | 1 | S02 |
| ...gugucacuuuccucugucag.....    | 15  | 0 | S02 |
| ...gugucacuuuccucugucGg.....    | 1   | 1 | S02 |
| ...ugcucacuuuccucuguc.....      | 34  | 0 | S02 |
| ...ugcucacuuuccucugU.....       | 3   | 1 | S02 |
| ...ugcucacuuuccucugucG.....     | 3   | 1 | S02 |
| ...ugcucacuuuccucuguca.....     | 1   | 0 | S02 |
| ...ugcucacuuuccucugucag.....    | 6   | 0 | S02 |
| ...ugcAcacuuuccucugucagc.....   | 1   | 1 | S02 |
| ...ugcucacuuuccucugugagc.....   | 1   | 1 | S02 |
| ...ugcucacuuuccUucugucagc.....  | 1   | 1 | S02 |
| ...uAcucacuuuccucugucagc.....   | 1   | 1 | S02 |
| ...ugcucacuCcuuccugucagc.....   | 2   | 1 | S02 |
| ...ugcucacuuuccucugucagU.....   | 40  | 1 | S02 |
| ...ugcuUacuuccucugucagc.....    | 1   | 1 | S02 |
| ...Cgcucacuuuccucugucagc.....   | 1   | 1 | S02 |
| ...ugcucacuuuccUugucagc.....    | 1   | 1 | S02 |
| ...ugcCcacuuccucugucagc.....    | 2   | 1 | S02 |
| ...ugcucacuucCcuuccugucagc..... | 1   | 1 | S02 |
| ...ugcuAacuuccucugucagc.....    | 2   | 1 | S02 |
| ...ugcucacuuccucugucagA.....    | 10  | 1 | S02 |
| ...ugcucacuuccucCgucagc.....    | 2   | 1 | S02 |
| ...ugcucUcuuccucugucagc.....    | 1   | 1 | S02 |
| ...ugcucacuuccucugucGgc.....    | 2   | 1 | S02 |
| ...ugcucacuuccucugucagc.....    | 230 | 0 | S02 |
| ...ugcGcacuuccucugucagc.....    | 1   | 1 | S02 |
| ...ugcucacuuccucugUagc.....     | 1   | 1 | S02 |
| ...ugcucGcuuccucugucagc.....    | 1   | 1 | S02 |
| ...ugcucUuuccucugucagc.....     | 2   | 1 | S02 |
| ...ugcucacuAcuuccucugucagc..... | 1   | 1 | S02 |
| ...ugUucacuuccucugucagc.....    | 1   | 1 | S02 |
| ...ugcucacuuccucuguaAgc.....    | 1   | 1 | S02 |
| ...ugcucacuuccucugucUgc.....    | 1   | 1 | S02 |
| ...ugcucacuuccucugucagG.....    | 1   | 1 | S02 |
| ...ugcucacuuccucugCcagc.....    | 1   | 1 | S02 |
| ...ugcucacuuccucugucagcC.....   | 2   | 1 | S02 |
| ...ugcucacuuccucugucagcuGa..... | 2   | 1 | S02 |
| ...cacuuccucugucagc.....        | 1   | 0 | S02 |



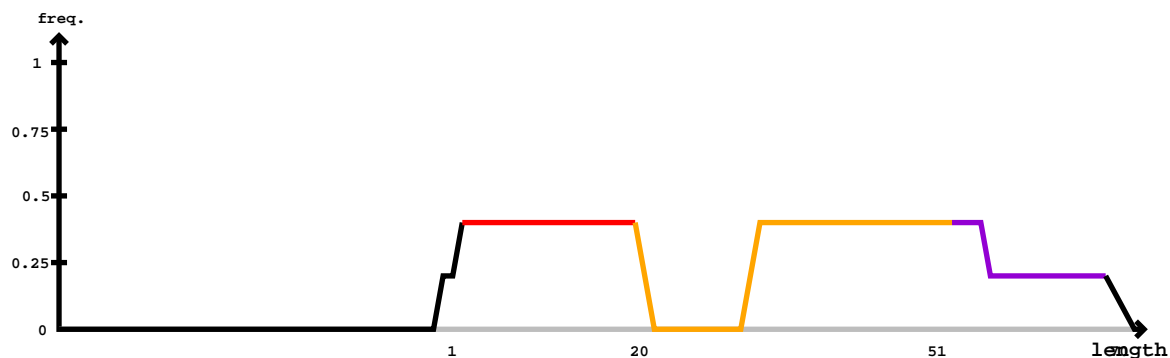

Star

[illegible]

Provisional ID : Maple\_Unigene\_BMK.44468\_203061  
 Score total : 2.1  
 Score for star read(s) : -1.3  
 Score for read counts : 0  
 Score for mfe : 0.4  
 Score for randfold : 0  
 Score for cons. seed : 3  
 Total read count : 37  
 Mature read count : 37  
 Loop read count : 0  
 Star read count : 0

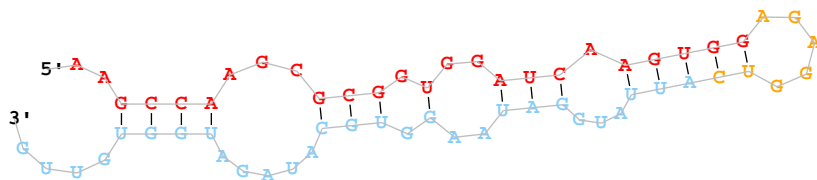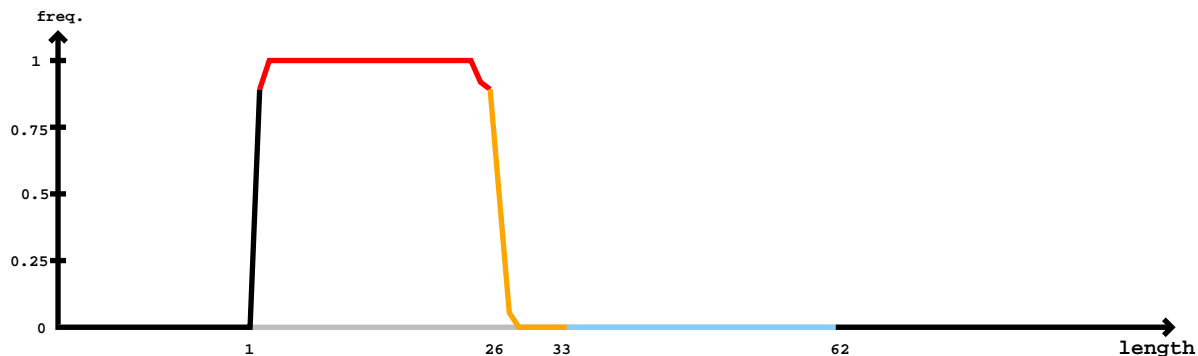

## Mature Star

| 5' -                                                                                                              |       | -3' | exp    |  |  |
|-------------------------------------------------------------------------------------------------------------------|-------|-----|--------|--|--|
|                                                                                                                   | reads | mm  | sample |  |  |
| auacaugguggcgacgacgaagccaagcgcgguggaucaaguggagaggucuuuauuggauaaggugcauagauggugugcauauugguguaaguggagaggucuuuccacag | 2     | 1   | S01    |  |  |
| .....aagccaagcgcggGggaucaagugg.....                                                                               | 1     | 1   | S01    |  |  |
| .....aagccaagcgcgguggaucaaguAg.....                                                                               | 11    | 0   | S01    |  |  |
| .....aagccaagcgcgguggaucaagugg.....                                                                               | 1     | 0   | S01    |  |  |
| .....agccaagcgcgguggaucaagugg.....                                                                                | 2     | 0   | S02    |  |  |
| .....aagccaagcgcgguggaucaagu.....                                                                                 | 1     | 0   | S02    |  |  |
| .....aagccaagcgcgguggaucaagugg.....                                                                               | 14    | 0   | S02    |  |  |
| .....aagccaagcgcgguggaucaaguggaA.....                                                                             | 1     | 1   | S02    |  |  |
| .....aagccaagcgcgguggaucaaguggaU.....                                                                             | 1     | 1   | S02    |  |  |
| .....agccaagcgcgguggaucaagu.....                                                                                  | 1     | 0   | S02    |  |  |
| .....agccaagcgcgguggaucaagugg.....                                                                                | 1     | 0   | S02    |  |  |
| .....agccaCgcgcgguggaucaagugga.....                                                                               | 1     | 1   | S02    |  |  |

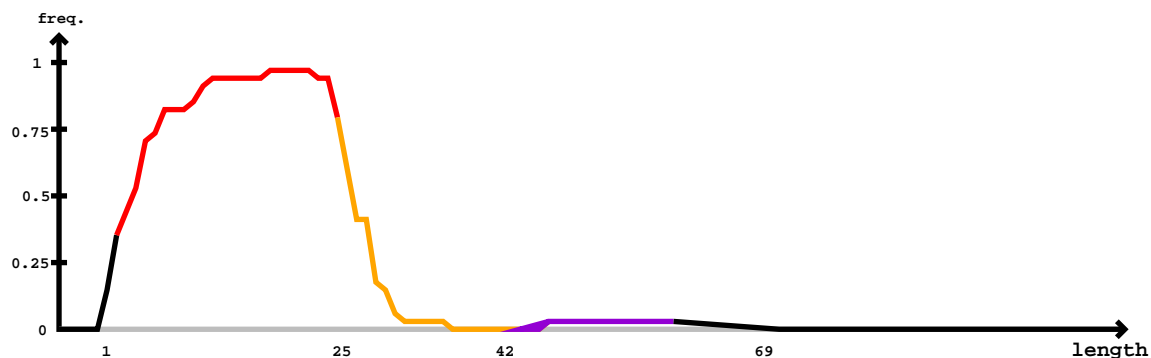

Star

|      |                                                                                                                         |       |     |
|------|-------------------------------------------------------------------------------------------------------------------------|-------|-----|
| 5' - | caca <u>cuugguuugaacuguggugacggaggc</u> uuuaggggaagcguccagccacauugauaaagaggccaaguguuacaaaagaaaagcuuuauucaaccaaaaaacacaa | -3'   | obs |
|      | caca <u>cuugguuugaacuguggugacggaggc</u> uuuaggggaagcguccagccacauugauaaagaggccaaguguuacaaaagaaaagcuuuauucaaccaaaaaacacaa |       | exp |
|      | .(((((((((((.....((((((....(((.((((((...))))).)))..)))).).....))))))))).....((((.....)))).....                          | reads | mm  |
|      | ..acuuggCuuugaacuguggugacg.....                                                                                         | 2     | 1   |
|      | ....uuggCuuugaacuguggugacgga.....                                                                                       | 1     | 1   |
|      | ....uggCuuugaacugugguga.....                                                                                            | 1     | 1   |
|      | ....ggCuuugaacuguggugacggagg.....                                                                                       | 3     | 1   |
|      | .....Cuugaacuguggugacgg.....                                                                                            | 1     | 1   |
|      | .....uuuugaacCguggugacggaggcu.....                                                                                      | 1     | 1   |
|      | .....ugaacCguggugacggaggcuu.....                                                                                        | 1     | 1   |
|      | .....gaacuguggugacggagC.....                                                                                            | 1     | 1   |
|      | .....aacuguggugacggagUcu.....                                                                                           | 1     | 1   |
|      | .....ggugacggaggcuuuaggg.....                                                                                           | 1     | 0   |
|      | .....ccacauugauaaagaggcU.....                                                                                           | 1     | 1   |
|      | ..acuuggCuuugaacuguggugacg.....                                                                                         | 3     | 1   |
|      | ....cuuggCuuugaacuguggugacgg.....                                                                                       | 7     | 1   |
|      | ....uuggCuuugaacuguggugacgga.....                                                                                       | 2     | 1   |
|      | ....uggCuuugaacuguggugacgg.....                                                                                         | 2     | 1   |
|      | ....ggCuuugaacuguggugacggagg.....                                                                                       | 3     | 1   |
|      | .....gCuuugaacuguggugacggaggc.....                                                                                      | 1     | 1   |
|      | .....Cuugaacuguggugacggagg.....                                                                                         | 1     | 1   |
|      | .....gaacuguggugacggaggcu.....                                                                                          | 1     | 0   |

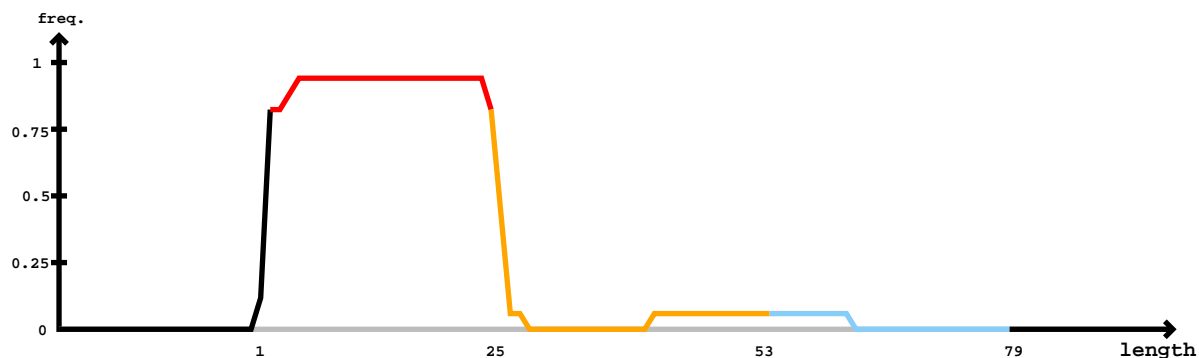

Star

| 5'-   | ucaaugggcacauugacucauuugugggcuuacacgaucucucaucgucagucucuccaucuuccgauagaucaugaagauguaagacagcuccauuaggauggggaucuccuca | -3'   | exp |        |
|-------|---------------------------------------------------------------------------------------------------------------------|-------|-----|--------|
|       | ((((((((.....))))))(((.....(((((((((((((((.....)))))).)))))))))).))..))..))..((.....)).                             | reads | mm  | sample |
| ..... | cauuugugggcuuacacgaucucucau.....                                                                                    | 1     | 0   | S01    |
| ..... | auuugugggcuuacacgaucucucauc.....                                                                                    | 4     | 0   | S01    |
| ..... | auuugugggcuuacacgaucuuAauc.....                                                                                     | 1     | 1   | S01    |
| ..... | ugugggcuuacacgaucucucaucguc.....                                                                                    | 1     | 0   | S01    |
| ..... | cauuugugggcuuacacgaucucucau.....                                                                                    | 1     | 0   | S02    |
| ..... | auuugugggcuuacGcgaucucucauc.....                                                                                    | 1     | 1   | S02    |
| ..... | auuugugggcuuacacgaucucucauc.....                                                                                    | 6     | 0   | S02    |
| ..... | uugugggcuuacacgaucucucauA.....                                                                                      | 1     | 1   | S02    |
| ..... | uccgauagaucaugaagaugu.....                                                                                          | 1     | 0   | S02    |

[illegible]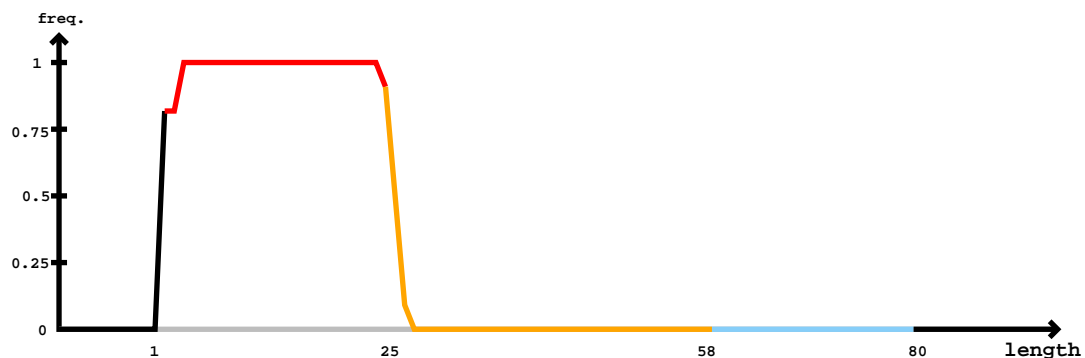

Star

| 5'-       | ugagagaggugagugaucgugagauugagagugaguucuuuuuuuaauuuuuuguuuuguggguucgaucaaauccaaaacaccacuccaagagauc- | -3'   | exp |        |
|-----------|----------------------------------------------------------------------------------------------------|-------|-----|--------|
|           |                                                                                                    | reads | mm  | sample |
| . . . . . | ugagugaucgugagauuugagagu.                                                                          | 5     | 0   | S01    |
| . . . . . | ugagugaucgugagauuugagagC.                                                                          | 1     | 1   | S01    |
| . . . . . | agugaGcgugagauuugagagu.                                                                            | 1     | 1   | S01    |
| . . . . . | agugaucgugagauuugagaguug.                                                                          | 1     | 0   | S01    |
| <br>      |                                                                                                    |       |     |        |
| . . . . . | ugagugaucgugagauuugagag.                                                                           | 1     | 0   | S02    |
| . . . . . | ugagugaucgugagauuugagagu.                                                                          | 2     | 0   | S02    |

The diagram illustrates a segment of a DNA double helix. The top strand is oriented 5' to 3' from left to right, with bases C, A, C, G, C, A, G, A, U, G, U, U, G, C, C, A, C, G. The bottom strand is oriented 3' to 5' from left to right, with bases G, C, U, G, G, U, C, U, A, U, A, A, C, G, C, U, G, U. Base pairs are connected by vertical lines representing hydrogen bonds: C-G, A-T, C-G, G-C, C-G, A-T, G-C, A-T, U-A, G-C, U-A, U-A, G-C, C-G, C-G, A-T, C-G.

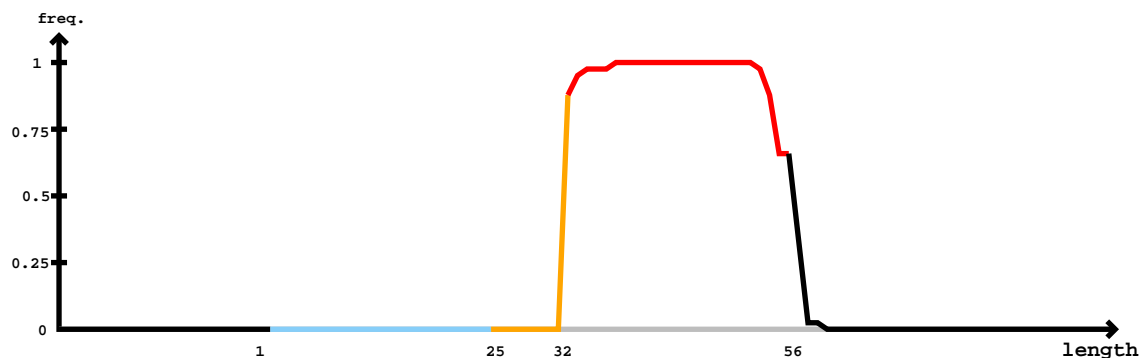

## Mature

[illegible]

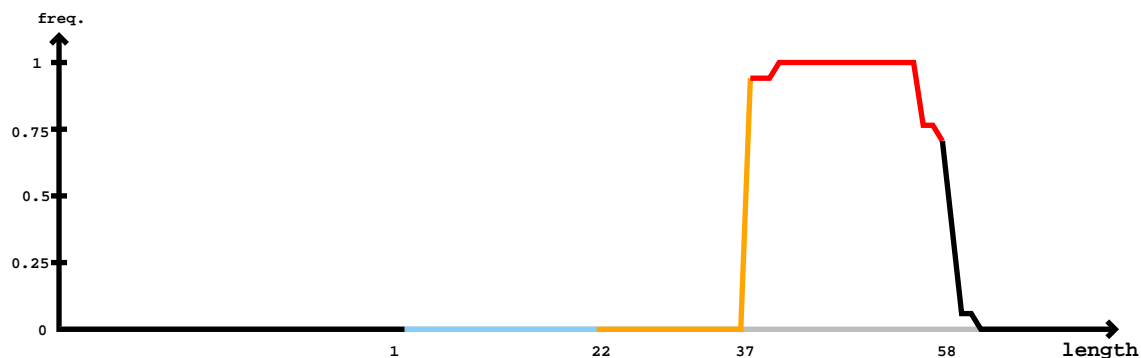

**Mature**

| 5'                                                                                                    | aaguuauuggguacaucugaugcaccaugcauccacccagauauugccacauaagcuuaguuuucguggcaacacucuggguggggaucacauaacaucuccg | -3' | exp |        |
|-------------------------------------------------------------------------------------------------------|---------------------------------------------------------------------------------------------------------|-----|-----|--------|
| .....((((.....((((((((((((((((((((((((((((((((.....((((((((.....))))))))))))))))))))))))))))))))..... | reads                                                                                                   | mm  |     | sample |
| .....cguggcaacacucugggug.....                                                                         | 3                                                                                                       | 0   |     | S01    |
| .....cguuAgcaacacucuggguggg.....                                                                      | 1                                                                                                       | 1   |     | S01    |
| .....cguggcaacacucugggugggg.....                                                                      | 1                                                                                                       | 0   |     | S01    |
| .....cguggcaacacucugggugAgg.....                                                                      | 3                                                                                                       | 1   |     | S01    |
| .....cguggcaacacucgAgugggg.....                                                                       | 1                                                                                                       | 1   |     | S01    |
| .....cguggcaacacucugggug.....                                                                         | 1                                                                                                       | 0   |     | S02    |
| .....cguggcaacacucugggugggg.....                                                                      | 1                                                                                                       | 0   |     | S02    |
| .....cguggcaacacucugggugAgg.....                                                                      | 4                                                                                                       | 1   |     | S02    |
| .....cguggcaacacucuggguggggaug.....                                                                   | 1                                                                                                       | 1   |     | S02    |
| .....ggcaacacucugggugggga.....                                                                        | 1                                                                                                       | 0   |     | S02    |
