# Supplementary material for: Gene Expressing and sRNA Sequencing Show That Gene Differentiation Associates with a Yellow Acer palmatum Mutant Leaf in Different Light Conditions
Source: Biomed Res Int. 2015 Dec 15;2015:843470. doi: 10.1155/2015/843470 (PMC4692996; doi:10.1155/2015/843470)
Supplement: Supplementary file 1 — Fig S1. Saturation Curve of high-throughput sequencing. Fig S2. KEGG annotation of DEGs in photosynthesis pathway. Fig S3. KEGG annotation of DEGs related to antenna proteins. [file 843470.f1.zip › SupMaterial.xlsx]

## Sheet: S1
Table S1. Annotation and classification of DEGs
#ID	FDR	log2FC	regulated	COG_class	COG_class_annotation	GO_annotation	KEGG_annotation	Swissprot_annotation	TrEMBL_annotation	nr_annotation	nt_annotation
Maple_Unigene_BMK.23261	0	-6.40398	down	[R]	General function prediction only	Cellular Component: vacuole (GO:0005773);; Cellular Component: plasma membrane (GO:0005886);; Biological Process: nitric oxide biosynthetic process (GO:0006809);; Molecular Function: electron carrier activity (GO:0009055);; Biological Process: response to light stimulus (GO:0009416);; Biological Process: response to symbiotic fungus (GO:0009610);; Molecular Function: nitrate reductase (NADH) acti…	--	sp|P08509|NIA2_TOBAC Nitrate reductase [NADH] 2 OS=Nicotiana tabacum GN=NIA2 PE=2 SV=2	Nitrate reductase GN=VIT_18s0001g03910 OS=Vitis vinifera (Grape) PE=3 SV=1	gi|225459455|ref|XP_002285831.1| PREDICTED: similar to nitrate reductase [Vitis vinifera]	Tilia platyphyllos nitrate reductase (nr1) mRNA, complete cds
Maple_Unigene_BMK.29020	0	-5.95076	down	--	--	--	--	--	Vegetative storage protein GN=VSP1 OS=Litchi chinensis (Lychee) PE=2 SV=1	gi|109895416|gb|ABG47463.1| vegetative storage protein [Litchi chinensis]	--
Maple_Unigene_BMK.3682	2.22e-15	-5.60643	down	--	--	Molecular Function: iron ion binding (GO:0005506);; Cellular Component: chloroplast thylakoid membrane (GO:0009535);; Cellular Component: chloroplast stroma (GO:0009570);; Biological Process: response to wounding (GO:0009611);; Biological Process: response to fungus (GO:0009620);; Biological Process: jasmonic acid biosynthetic process (GO:0009695);; Biological Process: response to jasmonic acid s…	--	sp|P38418|LOX2_ARATH Lipoxygenase 2, chloroplastic OS=Arabidopsis thaliana GN=LOX2 PE=1 SV=1	Putative uncharacterized protein GN=VIT_13s0064g01500 OS=Vitis vinifera (Grape) PE=4 SV=1	gi|50512304|gb|AAT77551.1| LoxC-like [Solanum pimpinellifolium]	Citrus jambhiri mRNA for lipoxygenase, complete cds
Maple_Unigene_BMK.29566	1.95e-10	-5.51786	down	--	--	Molecular Function: protein binding (GO:0005515);; Cellular Component: nucleus (GO:0005634);; Biological Process: signal transduction (GO:0007165);; Biological Process: response to wounding (GO:0009611);; Biological Process: response to jasmonic acid stimulus (GO:0009753);; Biological Process: cellular response to organic substance (GO:0071310);;	K13464|8e-29|rcu:RCOM_0684970|jasmonate ZIM domain-containing protein	sp|Q9C9E3|TI11B_ARATH Protein TIFY 11B OS=Arabidopsis thaliana GN=TIFY11B PE=1 SV=1	Putative uncharacterized protein GN=RCOM_0684970 OS=Ricinus communis (Castor bean) PE=4 SV=1	gi|255576619|ref|XP_002529200.1| conserved hypothetical protein [Ricinus communis]	Picea glauca clone GQ03914_P23 mRNA sequence
Maple_Unigene_BMK.29021	0	-5.42778	down	--	--	--	--	sp|P32765|ASP_THECC 21 kDa seed protein OS=Theobroma cacao GN=ASP PE=2 SV=1	Talisin (Fragment) OS=Talisia esculenta PE=2 SV=1	gi|213536447|gb|ACJ51124.1| talisin [Talisia esculenta]	--
Maple_Unigene_BMK.32355	0	-5.38162	down	--	--	Molecular Function: receptor activity (GO:0004872);; Molecular Function: protein binding (GO:0005515);; Cellular Component: nucleus (GO:0005634);; Cellular Component: cytoplasm (GO:0005737);; Biological Process: abscisic acid mediated signaling pathway (GO:0009738);; Molecular Function: abscisic acid binding (GO:0010427);;	K14496|1e-103|vvi:100267073|abscisic acid receptor PYR/PYL family	sp|O80920|PYL4_ARATH Abscisic acid receptor PYL4 OS=Arabidopsis thaliana GN=PYL4 PE=1 SV=1	Putative uncharacterized protein GN=VIT_08s0058g00470 OS=Vitis vinifera (Grape) PE=4 SV=1	gi|225439530|ref|XP_002264158.1| PREDICTED: hypothetical protein [Vitis vinifera]	Lotus japonicus genomic DNA, chromosome 3, clone: LjT46B01, TM0116, complete sequence
Maple_Unigene_BMK.26561	0	-5.22941	down	--	--	Cellular Component: plasma membrane (GO:0005886);; Biological Process: protein targeting to membrane (GO:0006612);; Biological Process: nucleotide transport (GO:0006862);; Biological Process: ER to Golgi vesicle-mediated transport (GO:0006888);; Biological Process: cellular membrane fusion (GO:0006944);; Biological Process: response to wounding (GO:0009611);; Biological Process: systemic acquired…	--	sp|Q9SB67|NRT32_ARATH High-affinity nitrate transporter 3.2 OS=Arabidopsis thaliana GN=NRT3.2 PE=2 SV=1	Predicted protein GN=POPTRDRAFT_570166 OS=Populus trichocarpa (Western balsam poplar) PE=4 SV=1	gi|224119494|ref|XP_002318088.1| predicted protein [Populus trichocarpa]	--
Maple_Unigene_BMK.11762	9.93e-09	-5.22555	down	--	--	Molecular Function: iron ion binding (GO:0005506);; Cellular Component: chloroplast thylakoid membrane (GO:0009535);; Cellular Component: chloroplast stroma (GO:0009570);; Biological Process: response to wounding (GO:0009611);; Biological Process: response to fungus (GO:0009620);; Biological Process: jasmonic acid biosynthetic process (GO:0009695);; Biological Process: response to jasmonic acid s…	--	sp|Q8GSM2|LOX23_HORVU Lipoxygenase 2.3, chloroplastic OS=Hordeum vulgare GN=LOX2.3 PE=1 SV=1	Predicted protein GN=POPTRDRAFT_940698 OS=Populus trichocarpa (Western balsam poplar) PE=4 SV=1	gi|224103783|ref|XP_002334016.1| predicted protein [Populus trichocarpa]	Ricinus communis lipoxygenase, putative, mRNA
Maple_Unigene_BMK.9576	8.22e-15	-5.16251	down	--	--	--	--	sp|P20144|WUN1_SOLTU Wound-induced protein 1 OS=Solanum tuberosum GN=WUN1 PE=2 SV=1	Predicted protein GN=POPTRDRAFT_777966 OS=Populus trichocarpa (Western balsam poplar) PE=4 SV=1	gi|224139286|ref|XP_002323037.1| predicted protein [Populus trichocarpa]	Populus trichocarpa predicted protein, mRNA
Maple_Unigene_BMK.30628	0	-5.0841	down	[E]	Amino acid transport and metabolism	Molecular Function: glutamate decarboxylase activity (GO:0004351);; Molecular Function: calmodulin binding (GO:0005516);; Cellular Component: nucleus (GO:0005634);; Cellular Component: cytosol (GO:0005829);; Biological Process: glutamate metabolic process (GO:0006536);; Molecular Function: pyridoxal phosphate binding (GO:0030170);; Biological Process: response to cadmium ion (GO:0046686);;	K01580|3e-94|pop:POPTR_884984|glutamate decarboxylase [EC:4.1.1.15]	sp|Q07346|DCE_PETHY Glutamate decarboxylase OS=Petunia hybrida GN=GAD PE=1 SV=1	Glutamate decarboxylase OS=Citrus sinensis (Sweet orange) PE=2 SV=1	gi|70609690|gb|AAZ05070.1| glutamate decarboxylase [Citrus sinensis]	Citrus sinensis glutamate decarboxylase mRNA, complete cds
Maple_Unigene_BMK.15266	0	-5.08262	down	--	--	Cellular Component: plant-type cell wall (GO:0009505);; Cellular Component: plasmodesma (GO:0009506);; Biological Process: root morphogenesis (GO:0010015);; Biological Process: response to karrikin (GO:0080167);;	--	--	Predicted protein GN=POPTRDRAFT_794276 OS=Populus trichocarpa (Western balsam poplar) PE=4 SV=1	gi|224157625|ref|XP_002337874.1| predicted protein [Populus trichocarpa]	Ricinus communis conserved hypothetical protein, mRNA
Maple_Unigene_BMK.32153	0	-4.98276	down	[P]	Inorganic ion transport and metabolism	Cellular Component: mitochondrion (GO:0005739);; Cellular Component: chloroplast stroma (GO:0009570);; Biological Process: response to nitrate (GO:0010167);; Cellular Component: membrane (GO:0016020);; Molecular Function: heme binding (GO:0020037);; Cellular Component: apoplast (GO:0048046);; Molecular Function: ferredoxin-nitrite reductase activity (GO:0048307);; Molecular Function: iron-sulfur …	K00366|0.0|rcu:RCOM_0813440|ferredoxin-nitrite reductase [EC:1.7.7.1]	sp|P05314|NIR_SPIOL Ferredoxin--nitrite reductase, chloroplastic OS=Spinacia oleracea GN=NIR PE=1 SV=1	Ferredoxin--nitrite reductase, chloroplast, putative GN=RCOM_0813440 OS=Ricinus communis (Castor bean) PE=4 SV=1	gi|255555453|ref|XP_002518763.1| Ferredoxin--nitrite reductase, chloroplast precursor, putative [Ricinus communis]	Populus trichocarpa predicted protein, mRNA
Maple_Unigene_BMK.22574	2.78e-07	-4.94856	down	--	--	--	--	sp|Q05091|PGIP_PYRCO Polygalacturonase inhibitor OS=Pyrus communis GN=PGIP PE=1 SV=1	Polygalacturonase-inhibitor protein GN=PGIP2 OS=Citrus hybrid cultivar PE=4 SV=1	gi|18148923|dbj|BAB83520.1| polygalacturonase-inhibitor protein [Citrus sp. cv. Sainumphung]	Microcitrus sp. citruspark01 PGIP gene for polygalacturonase-inhibiting protetin, complete cds
Maple_Unigene_BMK.54	4.57e-07	-4.90426	down	--	--	Molecular Function: hydrolase activity, hydrolyzing O-glycosyl compounds (GO:0004553);; Cellular Component: cell wall (GO:0005618);; Biological Process: cellular glucan metabolic process (GO:0006073);; Molecular Function: xyloglucan:xyloglucosyl transferase activity (GO:0016762);; Cellular Component: apoplast (GO:0048046);;	K08235|1e-51|pop:POPTR_711461|xyloglucan:xyloglucosyl transferase [EC:2.4.1.207]	sp|Q38911|XTH15_ARATH Probable xyloglucan endotransglucosylase/hydrolase protein 15 OS=Arabidopsis thaliana GN=XTH15 PE=1 SV=1	Predicted protein GN=POPTRDRAFT_711461 OS=Populus trichocarpa (Western balsam poplar) PE=2 SV=1	gi|224065278|ref|XP_002301752.1| predicted protein [Populus trichocarpa]	Litchi chinensis xyloglucan endotransglycosylase 3 (XET3) mRNA, complete cds
Maple_Unigene_BMK.26015	4.57e-07	-4.90426	down	--	--	--	--	--	Predicted protein GN=POPTRDRAFT_820001 OS=Populus trichocarpa (Western balsam poplar) PE=4 SV=1	gi|224094628|ref|XP_002310190.1| predicted protein [Populus trichocarpa]	PREDICTED: Vitis vinifera hypothetical protein LOC100255767 (LOC100255767), mRNA
Maple_Unigene_BMK.11761	7.57e-07	-4.85856	down	--	--	Molecular Function: oxidoreductase activity, acting on single donors with incorporation of molecular oxygen, incorporation of two atoms of oxygen (GO:0016702);; Biological Process: oxylipin biosynthetic process (GO:0031408);; Cellular Component: chloroplast part (GO:0044434);; Molecular Function: metal ion binding (GO:0046872);; Biological Process: response to stimulus (GO:0050896);;	--	sp|Q8GSM2|LOX23_HORVU Lipoxygenase 2.3, chloroplastic OS=Hordeum vulgare GN=LOX2.3 PE=1 SV=1	Lipoxygenase GN=RCOM_1576890 OS=Ricinus communis (Castor bean) PE=3 SV=1	gi|255544764|ref|XP_002513443.1| lipoxygenase, putative [Ricinus communis]	--
Maple_Unigene_BMK.18451	7.57e-07	-4.85856	down	[O]	Posttranslational modification, protein turnover, chaperones	Molecular Function: arsenate reductase (glutaredoxin) activity (GO:0008794);; Molecular Function: electron carrier activity (GO:0009055);; Molecular Function: protein disulfide oxidoreductase activity (GO:0015035);; Biological Process: methylglyoxal catabolic process to D-lactate (GO:0019243);; Biological Process: cell redox homeostasis (GO:0045454);; Biological Process: anther development (GO:00…	--	sp|Q9LYC8|GRXS6_ARATH Monothiol glutaredoxin-S6 OS=Arabidopsis thaliana GN=GRXS6 PE=3 SV=1	Glutaredoxin GN=PtrGrx20 OS=Populus trichocarpa (Western balsam poplar) PE=4 SV=1	gi|224132412|ref|XP_002321333.1| glutaredoxin [Populus trichocarpa]	PREDICTED: Vitis vinifera hypothetical protein LOC100259665 (LOC100259665), mRNA
Maple_Unigene_BMK.47676	7.57e-07	-4.85856	down	--	--	Biological Process: response to oxidative stress (GO:0006979);; Biological Process: signal transduction (GO:0007165);; Biological Process: response to organic substance (GO:0010033);; Biological Process: regulation of defense response (GO:0031347);; Biological Process: innate immune response (GO:0045087);; Biological Process: response to other organism (GO:0051707);;	--	--	Putative uncharacterized protein GN=RCOM_0632480 OS=Ricinus communis (Castor bean) PE=4 SV=1	gi|255557293|ref|XP_002519677.1| conserved hypothetical protein [Ricinus communis]	--
Maple_Unigene_BMK.19096	0	-4.84462	down	--	--	Cellular Component: Golgi apparatus (GO:0005794);; Cellular Component: cytosol (GO:0005829);; Cellular Component: plant-type cell wall (GO:0009505);; Cellular Component: plasmodesma (GO:0009506);; Cellular Component: membrane (GO:0016020);; Biological Process: response to arsenic-containing substance (GO:0046685);;	--	--	Predicted protein GN=POPTRDRAFT_559074 OS=Populus trichocarpa (Western balsam poplar) PE=4 SV=1	gi|224084630|ref|XP_002307366.1| predicted protein [Populus trichocarpa]	Populus trichocarpa predicted protein, mRNA
Maple_Unigene_BMK.21609	0	-4.78876	down	[P]	Inorganic ion transport and metabolism	Cellular Component: plasma membrane (GO:0005886);; Cellular Component: plant-type vacuole membrane (GO:0009705);; Molecular Function: nitrate transmembrane transporter activity (GO:0015112);; Biological Process: nitrate transport (GO:0015706);; Cellular Component: integral to membrane (GO:0016021);; Biological Process: transmembrane transport (GO:0055085);;	--	sp|Q9LPV5|NRT25_ARATH High affinity nitrate transporter 2.5 OS=Arabidopsis thaliana GN=NRT2.5 PE=2 SV=1	Nitrate transporter GN=tNit2.2 OS=Populus tremula x Populus tremuloides PE=2 SV=1	gi|57283317|emb|CAG26717.1| nitrate transporter [Populus tremula x Populus tremuloides]	Ricinus communis nitrate transporter, putative, mRNA
Maple_Unigene_BMK.24873	0	-4.7376	down	--	--	Biological Process: response to stress (GO:0006950);; Biological Process: response to abscisic acid stimulus (GO:0009737);; Biological Process: regulation of cellular process (GO:0050794);;	--	sp|Q9FGF8|ABR1_ARATH Ethylene-responsive transcription factor ABR1 OS=Arabidopsis thaliana GN=ABR1 PE=2 SV=1	DNA binding protein, putative GN=RCOM_0131910 OS=Ricinus communis (Castor bean) PE=4 SV=1	gi|255584052|ref|XP_002532770.1| DNA binding protein, putative [Ricinus communis]	TSA: Arachis duranensis DurSNP_c6987.Ardu mRNA sequence
Maple_Unigene_BMK.14641	0	-4.69	down	--	--	Biological Process: MAPK cascade (GO:0000165);; Biological Process: response to reactive oxygen species (GO:0000302);; Cellular Component: intracellular (GO:0005622);; Biological Process: protein targeting to membrane (GO:0006612);; Biological Process: response to cold (GO:0009409);; Biological Process: response to wounding (GO:0009611);; Biological Process: abscisic acid mediated signaling pathw…	--	sp|P32292|ARG2_VIGRR Indole-3-acetic acid-induced protein ARG2 OS=Vigna radiata var. radiata GN=ARG2 PE=2 SV=1	Putative uncharacterized protein GN=VIT_07s0005g00660 OS=Vitis vinifera (Grape) PE=4 SV=1	gi|225437412|ref|XP_002270639.1| PREDICTED: hypothetical protein isoform 1 [Vitis vinifera]	Gossypium herbaceum clone NBRI_D_1802 simple sequence repeat marker, mRNA sequence
Maple_Unigene_BMK.18328	0	-4.65167	down	--	--	Molecular Function: carboxylesterase activity (GO:0004091);;	--	sp|Q0ZPV7|CXE1_ACTER Carboxylesterase 1 OS=Actinidia eriantha GN=CXE1 PE=1 SV=1	Predicted protein GN=POPTRDRAFT_808220 OS=Populus trichocarpa (Western balsam poplar) PE=4 SV=1	gi|224136894|ref|XP_002322442.1| predicted protein [Populus trichocarpa]	Vitis vinifera, whole genome shotgun sequence, contig VV78X269430.6, clone ENTAV 115
Maple_Unigene_BMK.23926	3.55e-15	-4.59744	down	[NU]	--	Cellular Component: plasma membrane (GO:0005886);; Cellular Component: anchored to membrane (GO:0031225);;	--	sp|Q9FPR2|AGP18_ARATH Lysine-rich arabinogalactan protein 18 OS=Arabidopsis thaliana GN=AGP18 PE=2 SV=1	Copper ion binding protein, putative GN=RCOM_1155100 OS=Ricinus communis (Castor bean) PE=4 SV=1	gi|255567969|ref|XP_002524962.1| copper ion binding protein, putative [Ricinus communis]	--
Maple_Unigene_BMK.37628	1.78e-05	-4.54901	down	--	--	--	--	sp|P17816|GRP1_HORVU Glycine-rich cell wall structural protein OS=Hordeum vulgare GN=GRP PE=2 SV=1	Putative uncharacterized protein GN=VIT_12s0059g00440 OS=Vitis vinifera (Grape) PE=4 SV=1	gi|225446977|ref|XP_002265274.1| PREDICTED: hypothetical protein [Vitis vinifera]	--
Maple_Unigene_BMK.17049	3.09e-05	-4.49028	down	--	--	Molecular Function: transferase activity, transferring phosphorus-containing groups (GO:0016772);;	--	sp|C0LGR6|Y4291_ARATH Probable LRR receptor-like serine/threonine-protein kinase At4g29180 OS=Arabidopsis thaliana GN=At4g29180 PE=2 SV=2	Putative uncharacterized protein GN=VIT_09s0002g02880 OS=Vitis vinifera (Grape) PE=4 SV=1	gi|297743143|emb|CBI36010.3| unnamed protein product [Vitis vinifera]	--
Maple_Unigene_BMK.32060	3.11e-15	-4.48034	down	--	--	Molecular Function: lysozyme activity (GO:0003796);; Molecular Function: chitinase activity (GO:0004568);; Biological Process: chitin catabolic process (GO:0006032);; Biological Process: response to cold (GO:0009409);; Biological Process: response to wounding (GO:0009611);; Biological Process: response to light intensity (GO:0009642);; Biological Process: response to salt stress (GO:0009651);; Bi…	--	sp|P51614|CHIT3_VITVI Acidic endochitinase OS=Vitis vinifera GN=CHIT3 PE=2 SV=1	Predicted protein (Fragment) GN=POPTRDRAFT_244776 OS=Populus trichocarpa (Western balsam poplar) PE=3 SV=1	gi|224130442|ref|XP_002320838.1| predicted protein [Populus trichocarpa]	Populus trichocarpa predicted protein, mRNA
Maple_Unigene_BMK.27116	7.71e-10	-4.46658	down	--	--	Cellular Component: integral to membrane (GO:0016021);; Cellular Component: chloroplast membrane (GO:0031969);;	--	sp|Q09MB8|YCF1_CITSI Putative membrane protein ycf1 OS=Citrus sinensis GN=ycf1-A PE=3 SV=1	Hypothetical chloroplast RF1 GN=ycf1 OS=Theobroma cacao (Cacao) PE=4 SV=2	gi|313199747|ref|YP_004021361.1| hypothetical chloroplast RF19 [Theobroma cacao]	Staphylea colchica voucher FLAS:D.E. and P.S. Soltis 2711 putative RF1 protein (ycf1) gene, complete cds; chloroplast
Maple_Unigene_BMK.15265	0	-4.44187	down	--	--	Cellular Component: plant-type cell wall (GO:0009505);; Cellular Component: plasmodesma (GO:0009506);; Biological Process: root morphogenesis (GO:0010015);; Biological Process: response to karrikin (GO:0080167);;	--	--	Putative uncharacterized protein GN=VIT_04s0008g05010 OS=Vitis vinifera (Grape) PE=4 SV=1	gi|225430200|ref|XP_002284962.1| PREDICTED: hypothetical protein [Vitis vinifera]	Ricinus communis conserved hypothetical protein, mRNA
Maple_Unigene_BMK.8066	0	-4.41296	down	--	--	Biological Process: defense response to nematode (GO:0002215);; Molecular Function: peroxidase activity (GO:0004601);; Cellular Component: vacuolar membrane (GO:0005774);; Cellular Component: Golgi apparatus (GO:0005794);; Biological Process: response to oxidative stress (GO:0006979);; Biological Process: flower development (GO:0009908);; Molecular Function: heme binding (GO:0020037);; Biological…	--	sp|P11965|PERX_TOBAC Lignin-forming anionic peroxidase OS=Nicotiana tabacum PE=2 SV=1	Putative uncharacterized protein GN=VITISV_002523 OS=Vitis vinifera (Grape) PE=3 SV=1	gi|225435628|ref|XP_002285649.1| PREDICTED: hypothetical protein [Vitis vinifera]	Populus trichocarpa predicted protein, mRNA
Maple_Unigene_BMK.18977	0	-4.40051	down	--	--	Molecular Function: peroxidase activity (GO:0004601);; Molecular Function: protein binding (GO:0005515);; Cellular Component: cytoplasm (GO:0005737);; Biological Process: response to oxidative stress (GO:0006979);; Biological Process: response to salt stress (GO:0009651);; Biological Process: trichoblast differentiation (GO:0010054);; Molecular Function: heme binding (GO:0020037);; Biological Pro…	K00430|0.0|rcu:RCOM_0578390|peroxidase [EC:1.11.1.7]	sp|Q43873|PER73_ARATH Peroxidase 73 OS=Arabidopsis thaliana GN=PER73 PE=1 SV=1	Peroxidase 5 GN=POD5 OS=Litchi chinensis (Lychee) PE=2 SV=2	gi|210062500|gb|ACI42310.2| peroxidase 5 [Litchi chinensis]	Litchi chinensis peroxidase 5 (POD5) mRNA, complete cds
Maple_Unigene_BMK.12213	3.38e-09	-4.36362	down	--	--	Cellular Component: plasma membrane (GO:0005886);; Biological Process: response to cold (GO:0009409);; Biological Process: response to auxin stimulus (GO:0009733);; Biological Process: response to red light (GO:0010114);; Biological Process: response to far red light (GO:0010218);; Biological Process: defense response to bacterium (GO:0042742);;	K14488|1e-32|pop:POPTR_556560|SAUR family protein	sp|P33080|AX10A_SOYBN Auxin-induced protein X10A OS=Glycine max PE=2 SV=1	SAUR family protein GN=SAUR82 OS=Populus trichocarpa (Western balsam poplar) PE=4 SV=1	gi|224080524|ref|XP_002306150.1| SAUR family protein [Populus trichocarpa]	small auxin up RNA gene cluster: orf 10A5 [Glycine max=soybeans, cv. Wayne, Genomic, 646 nt]
Maple_Unigene_BMK.39736	3.38e-09	-4.36362	down	--	--	Cellular Component: plastid (GO:0009536);; Molecular Function: metal ion binding (GO:0046872);;	--	sp|P21260|YPRO_OWEFU Uncharacterized proline-rich protein (Fragment) OS=Owenia fusiformis PE=4 SV=1	Putative uncharacterized protein GN=VIT_19s0090g00740 OS=Vitis vinifera (Grape) PE=4 SV=1	gi|222628914|gb|EEE61046.1| hypothetical protein OsJ_14899 [Oryza sativa Japonica Group]	Brassica rapa subsp. pekinensis clone KBrB042O03, complete sequence
Maple_Unigene_BMK.29295	0	-4.35134	down	[R]	General function prediction only	Molecular Function: auxin:hydrogen symporter activity (GO:0009672);; Biological Process: auxin polar transport (GO:0009926);; Cellular Component: integral to membrane (GO:0016021);; Cellular Component: cytoplasmic membrane-bounded vesicle (GO:0016023);; Biological Process: para-aminobenzoic acid metabolic process (GO:0046482);; Biological Process: transmembrane transport (GO:0055085);;	K07088|0.0|rcu:RCOM_0875040| K07088	sp|P38355|YB8B_YEAST Uncharacterized transporter YBR287W OS=Saccharomyces cerevisiae GN=YBR287W PE=1 SV=1	Auxin:hydrogen symporter, putative GN=RCOM_0875040 OS=Ricinus communis (Castor bean) PE=4 SV=1	gi|255561457|ref|XP_002521739.1| auxin:hydrogen symporter, putative [Ricinus communis]	Ricinus communis auxin:hydrogen symporter, putative, mRNA
Maple_Unigene_BMK.17934	7.76e-13	-4.30545	down	--	--	Molecular Function: fatty acid binding (GO:0005504);; Molecular Function: zinc ion binding (GO:0008270);; Biological Process: systemic acquired resistance, salicylic acid mediated signaling pathway (GO:0009862);; Cellular Component: cytoplasmic membrane-bounded vesicle (GO:0016023);;	--	sp|Q8W453|DIR1_ARATH Putative lipid-transfer protein DIR1 OS=Arabidopsis thaliana GN=DIR1 PE=1 SV=1	Putative uncharacterized protein OS=Populus trichocarpa (Western balsam poplar) PE=4 SV=1	gi|118484938|gb|ABK94334.1| unknown [Populus trichocarpa]	Ricinus communis lipid binding protein, putative, mRNA
Maple_Unigene_BMK.21111	1.21e-06	-4.24565	down	--	--	Molecular Function: kinase activity (GO:0016301);;	--	sp|C0LGT6|EFR_ARATH LRR receptor-like serine/threonine-protein kinase EFR OS=Arabidopsis thaliana GN=EFR PE=1 SV=1	Predicted protein GN=POPTRDRAFT_817461 OS=Populus trichocarpa (Western balsam poplar) PE=4 SV=1	gi|224075305|ref|XP_002304590.1| predicted protein [Populus trichocarpa]	--
Maple_Unigene_BMK.36747	1.21e-06	-4.24565	down	[IR]	--	Biological Process: very long-chain fatty acid metabolic process (GO:0000038);; Molecular Function: carboxylesterase activity (GO:0004091);; Cellular Component: cell wall (GO:0005618);; Cellular Component: nucleus (GO:0005634);; Biological Process: water transport (GO:0006833);; Cellular Component: chloroplast thylakoid (GO:0009534);; Biological Process: response to salt stress (GO:0009651);; Bio…	--	sp|Q9C7N4|GDL15_ARATH GDSL esterase/lipase At1g29670 OS=Arabidopsis thaliana GN=At1g29670 PE=2 SV=1	Putative uncharacterized protein OS=Glycine max (Soybean) PE=2 SV=1	gi|255638815|gb|ACU19711.1| unknown [Glycine max]	Ricinus communis zinc finger protein, putative, mRNA
Maple_Unigene_BMK.33166	0	-4.24346	down	--	--	--	--	sp|P52408|E13B_PRUPE Glucan endo-1,3-beta-glucosidase, basic isoform OS=Prunus persica GN=GNS1 PE=3 SV=1	Beta-1,3-glucanase (Precursor) GN=gns1 OS=Citrus sinensis (Sweet orange) PE=2 SV=1	gi|2274915|emb|CAA03908.1| beta-1,3-glucanase [Citrus sinensis]	Litchi chinensis cultivar Feizixiao glucanase (GLUC) mRNA, complete cds
Maple_Unigene_BMK.36101	0.000301215	-4.2281	down	--	--	--	--	--	Putative uncharacterized protein GN=MTR_4g091430 OS=Medicago truncatula (Barrel medic) PE=4 SV=1	--	Citrus maxima large subunit ribosomal RNA gene, partial sequence; mitochondrial
Maple_Unigene_BMK.33346	1.11e-16	-4.20639	down	[RTKL]	--	Molecular Function: nucleotide binding (GO:0000166);; Molecular Function: protein kinase activity (GO:0004672);; Cellular Component: plastid (GO:0009536);; Cellular Component: membrane (GO:0016020);; Cellular Component: cytoplasmic membrane-bounded vesicle (GO:0016023);; Biological Process: phosphorylation (GO:0016310);; Molecular Function: oxidoreductase activity (GO:0016491);;	--	sp|C0LGP4|Y3475_ARATH Probable LRR receptor-like serine/threonine-protein kinase At3g47570 OS=Arabidopsis thaliana GN=At3g47570 PE=1 SV=1	Putative uncharacterized protein GN=VIT_09s0018g01440 OS=Vitis vinifera (Grape) PE=3 SV=1	gi|224139658|ref|XP_002323215.1| predicted protein [Populus trichocarpa]	Populus trichocarpa predicted protein, mRNA
Maple_Unigene_BMK.32290	1.93e-06	-4.20391	down	[R]	General function prediction only	Cellular Component: chloroplast thylakoid membrane (GO:0009535);; Biological Process: photosynthesis (GO:0015979);;	--	sp|Q2PMU4|YCF3_SOYBN Photosystem I assembly protein ycf3 OS=Glycine max GN=ycf3 PE=3 SV=1	Photosystem I assembly protein Ycf3 GN=MTR_6g092730 OS=Medicago truncatula (Barrel medic) PE=4 SV=1	gi|224096217|ref|XP_002334707.1| predicted protein [Populus trichocarpa]	Citrus sinensis chloroplast, complete genome
Maple_Unigene_BMK.16588	1.93e-06	-4.20391	down	--	--	--	--	sp|Q17Q32|ENOPH_AEDAE Enolase-phosphatase E1 OS=Aedes aegypti GN=AAEL000109 PE=3 SV=1	Putative uncharacterized protein GN=VITISV_026166 OS=Vitis vinifera (Grape) PE=4 SV=1	gi|147783375|emb|CAN59884.1| hypothetical protein VITISV_026166 [Vitis vinifera]	--
Maple_Unigene_BMK.21303	0	-4.20267	down	--	--	Molecular Function: nucleotide binding (GO:0000166);; Molecular Function: superoxide dismutase activity (GO:0004784);; Biological Process: L-fucose biosynthetic process (GO:0006005);; Biological Process: stomatal complex morphogenesis (GO:0010103);; Cellular Component: cytoplasmic membrane-bounded vesicle (GO:0016023);; Biological Process: L-ascorbic acid biosynthetic process (GO:0019853);; Biolo…	--	sp|P94040|GL31_ARATH Germin-like protein subfamily 3 member 1 OS=Arabidopsis thaliana GN=GLP1 PE=1 SV=1	Auxin-binding protein ABP19a, putative GN=RCOM_0652470 OS=Ricinus communis (Castor bean) PE=4 SV=1	gi|255560629|ref|XP_002521328.1| Auxin-binding protein ABP19a precursor, putative [Ricinus communis]	Ricinus communis Auxin-binding protein ABP19a precursor, putative, mRNA
Maple_Unigene_BMK.44041	0	-4.1813	down	--	--	--	--	sp|P32765|ASP_THECC 21 kDa seed protein OS=Theobroma cacao GN=ASP PE=2 SV=1	Talisin (Fragment) OS=Talisia esculenta PE=2 SV=1	gi|213536447|gb|ACJ51124.1| talisin [Talisia esculenta]	Talisia esculenta talisin mRNA, partial cds
Maple_Unigene_BMK.30627	0	-4.16937	down	[E]	Amino acid transport and metabolism	Biological Process: transition metal ion transport (GO:0000041);; Molecular Function: glutamate decarboxylase activity (GO:0004351);; Molecular Function: calmodulin binding (GO:0005516);; Cellular Component: nucleus (GO:0005634);; Cellular Component: cytosol (GO:0005829);; Biological Process: glutamate metabolic process (GO:0006536);; Biological Process: response to nitrate (GO:0010167);; Biologi…	K01580|1e-125|vvi:100266215|glutamate decarboxylase [EC:4.1.1.15]	sp|Q07346|DCE_PETHY Glutamate decarboxylase OS=Petunia hybrida GN=GAD PE=1 SV=1	Putative uncharacterized protein GN=VIT_01s0011g06600 OS=Vitis vinifera (Grape) PE=3 SV=1	gi|297737555|emb|CBI26756.3| unnamed protein product [Vitis vinifera]	Citrus sinensis glutamate decarboxylase mRNA, complete cds
Maple_Unigene_BMK.34556	7.88e-15	-4.15789	down	[R]	General function prediction only	Molecular Function: structural molecule activity (GO:0005198);; Cellular Component: cytosol (GO:0005829);; Biological Process: gluconeogenesis (GO:0006094);; Biological Process: phosphatidylinositol biosynthetic process (GO:0006661);; Biological Process: intracellular protein transport (GO:0006886);; Biological Process: cytoskeleton organization (GO:0007010);; Biological Process: proteasomal prot…	--	sp|Q8L828|COB23_ARATH Coatomer subunit beta&apos;-3 OS=Arabidopsis thaliana GN=At3g15980 PE=2 SV=1	Predicted protein (Fragment) GN=POPTRDRAFT_817095 OS=Populus trichocarpa (Western balsam poplar) PE=4 SV=1	gi|224073825|ref|XP_002304183.1| predicted protein [Populus trichocarpa]	Populus trichocarpa predicted protein, mRNA
Maple_Unigene_BMK.33155	0.00054289	-4.15437	down	--	--	--	--	sp|P16273|PRPX_HORVU Pathogen-related protein OS=Hordeum vulgare PE=2 SV=2	Predicted protein GN=POPTRDRAFT_559341 OS=Populus trichocarpa (Western balsam poplar) PE=4 SV=1	gi|224082406|ref|XP_002306682.1| predicted protein [Populus trichocarpa]	Populus trichocarpa predicted protein, mRNA
Maple_Unigene_BMK.37188	3.07e-13	-4.12993	down	--	--	Biological Process: metabolic process (GO:0008152);; Molecular Function: oxidoreductase activity, acting on diphenols and related substances as donors, oxygen as acceptor (GO:0016682);; Molecular Function: metal ion binding (GO:0046872);;	--	--	Laccase, putative GN=RCOM_0647160 OS=Ricinus communis (Castor bean) PE=4 SV=1	gi|255567618|ref|XP_002524788.1| laccase, putative [Ricinus communis]	--
Maple_Unigene_BMK.14490	0	-4.10131	down	[Q]	Secondary metabolites biosynthesis, transport and catabolism	Molecular Function: monooxygenase activity (GO:0004497);; Molecular Function: electron carrier activity (GO:0009055);; Molecular Function: oxidoreductase activity, acting on paired donors, with incorporation or reduction of molecular oxygen (GO:0016705);; Molecular Function: heme binding (GO:0020037);; Biological Process: oxidation-reduction process (GO:0055114);;	--	sp|O23976|C76B1_HELTU 7-ethoxycoumarin O-deethylase OS=Helianthus tuberosus GN=CYP76B1 PE=1 SV=1	Cytochrome P450 GN=CYP76F3 OS=Populus trichocarpa (Western balsam poplar) PE=3 SV=1	gi|224058639|ref|XP_002299579.1| cytochrome P450 [Populus trichocarpa]	Populus trichocarpa cytochrome P450 (CYP76F3), mRNA
Maple_Unigene_BMK.24592	0	-4.0979	down	[R]	General function prediction only	Molecular Function: copper ion binding (GO:0005507);; Cellular Component: cell wall (GO:0005618);; Cellular Component: plasma membrane (GO:0005886);; Biological Process: response to fungus (GO:0009620);; Biological Process: response to salt stress (GO:0009651);; Biological Process: ethylene biosynthetic process (GO:0009693);; Biological Process: detection of ethylene stimulus (GO:0009727);; Molec…	K05933|0.0|pop:POPTR_573016|aminocyclopropanecarboxylate oxidase [EC:1.14.17.4]	sp|Q9MB94|ACCO_PRUMU 1-aminocyclopropane-1-carboxylate oxidase OS=Prunus mume GN=ACO1 PE=2 SV=1	1-aminocyclopropane-1-carboxylate oxidase GN=peaco-1 OS=Populus canadensis (Canadian poplar) PE=2 SV=1	gi|7576446|dbj|BAA94601.1| 1-aminocyclopropane-1-carboxylate oxidase [Populus x canadensis]	Dimocarpus longan cultivar Songfengben ACC oxidase mRNA, complete cds
Maple_Unigene_BMK.14136	0	-4.05105	down	--	--	Cellular Component: Golgi apparatus (GO:0005794);; Cellular Component: cytosol (GO:0005829);; Cellular Component: plant-type cell wall (GO:0009505);; Cellular Component: plasmodesma (GO:0009506);; Biological Process: response to arsenic-containing substance (GO:0046685);;	--	--	Putative uncharacterized protein GN=VIT_07s0005g00870 OS=Vitis vinifera (Grape) PE=4 SV=1	gi|225437453|ref|XP_002272941.1| PREDICTED: hypothetical protein [Vitis vinifera]	Populus trichocarpa predicted protein, mRNA
Maple_Unigene_BMK.19794	1.32e-05	-4.02374	down	[R]	General function prediction only	Molecular Function: chitinase activity (GO:0004568);; Biological Process: chitin catabolic process (GO:0006032);; Molecular Function: chitin binding (GO:0008061);; Biological Process: cell wall macromolecule catabolic process (GO:0016998);;	--	sp|P24626|CHI3_ORYSJ Chitinase 3 OS=Oryza sativa subsp. japonica GN=Cht3 PE=2 SV=2	Chitinase (Precursor) GN=chit1b OS=Vitis vinifera (Grape) PE=4 SV=1	gi|10880381|emb|CAC14015.1| chitinase [Vitis vinifera]	Citrus unshiu Chi mRNA for chitinase, complete cds
Maple_Unigene_BMK.23388	3.93e-07	-4.00159	down	--	--	Molecular Function: ubiquitin-protein ligase activity (GO:0004842);; Molecular Function: zinc ion binding (GO:0008270);; Biological Process: protein ubiquitination (GO:0016567);;	--	sp|Q9LY41|ATL4_ARATH E3 ubiquitin-protein ligase ATL4 OS=Arabidopsis thaliana GN=ATL4 PE=1 SV=1	Predicted protein GN=POPTRDRAFT_781319 OS=Populus trichocarpa (Western balsam poplar) PE=4 SV=1	gi|224137074|ref|XP_002327015.1| predicted protein [Populus trichocarpa]	Ricinus communis ring finger protein, putative, mRNA
Maple_Unigene_BMK.17151	3.93e-07	-4.00159	down	[G]	Carbohydrate transport and metabolism	Biological Process: phloem or xylem histogenesis (GO:0010087);; Biological Process: leaf vascular tissue pattern formation (GO:0010305);; Biological Process: cotyledon vascular tissue pattern formation (GO:0010588);; Biological Process: leaf development (GO:0048366);;	--	sp|P10495|GRP1_PHAVU Glycine-rich cell wall structural protein 1.0 OS=Phaseolus vulgaris PE=2 SV=1	Glycine-rich_protein_(Aa1-291) (Precursor) GN=GRP22 OS=Brassica napus (Rape) PE=4 SV=1	gi|17821|emb|CAA78762.1| glycine-rich_protein_(aa1-291) [Brassica napus]	Volvox carteri f. nagariensis hypothetical protein, mRNA
Maple_Unigene_BMK.24582	0.00180788	-3.99454	down	[S]	Function unknown	Molecular Function: catalytic activity (GO:0003824);;	--	sp|Q9FN37|PSKR2_ARATH Phytosulfokine receptor 2 OS=Arabidopsis thaliana GN=PSKR2 PE=2 SV=1	Predicted protein GN=POPTRDRAFT_583646 OS=Populus trichocarpa (Western balsam poplar) PE=4 SV=1	gi|224120284|ref|XP_002331010.1| predicted protein [Populus trichocarpa]	--
Maple_Unigene_BMK.25804	8.8e-12	-3.94102	down	--	--	--	--	sp|Q17Q32|ENOPH_AEDAE Enolase-phosphatase E1 OS=Aedes aegypti GN=AAEL000109 PE=3 SV=1	Putative uncharacterized protein GN=VIT_14s0066g00610 OS=Vitis vinifera (Grape) PE=4 SV=1	gi|147783375|emb|CAN59884.1| hypothetical protein VITISV_026166 [Vitis vinifera]	--
Maple_Unigene_BMK.20307	3.54e-05	-3.92445	down	--	--	Cellular Component: plasmodesma (GO:0009506);; Cellular Component: membrane (GO:0016020);; Cellular Component: cytoplasmic membrane-bounded vesicle (GO:0016023);; Biological Process: response to other organism (GO:0051707);;	--	sp|P50699|TLPH_ARATH Thaumatin-like protein OS=Arabidopsis thaliana GN=At1g18250 PE=2 SV=2	Protein P21, putative GN=RCOM_0337100 OS=Ricinus communis (Castor bean) PE=4 SV=1	gi|255584165|ref|XP_002532822.1| Protein P21, putative [Ricinus communis]	Ricinus communis Protein P21, putative, mRNA
Maple_Unigene_BMK.18693	0.0033404	-3.90745	down	--	--	--	--	--	Putative uncharacterized protein GN=VITISV_017511 OS=Vitis vinifera (Grape) PE=4 SV=1	gi|225425498|ref|XP_002263440.1| PREDICTED: hypothetical protein [Vitis vinifera]	--
Maple_Unigene_BMK.14675	9.22e-08	-3.87854	down	--	--	Molecular Function: DNA binding (GO:0003677);; Cellular Component: intracellular (GO:0005622);; Biological Process: regulation of transcription, DNA-dependent (GO:0006355);; Biological Process: defense response (GO:0006952);; Biological Process: response to bacterium (GO:0009617);; Biological Process: response to nematode (GO:0009624);; Biological Process: response to auxin stimulus (GO:0009733);…	--	sp|Q9FGZ4|WRK48_ARATH Probable WRKY transcription factor 48 OS=Arabidopsis thaliana GN=WRKY48 PE=2 SV=1	WRKY transcription factor 31 (Fragment) OS=Dimocarpus longan PE=2 SV=1	gi|255556432|ref|XP_002519250.1| WRKY transcription factor, putative [Ricinus communis]	(Populus tomentosa x P. bolleana) x P. tomentosa WRKY transcription factor 31 mRNA, complete cds
Maple_Unigene_BMK.6068	2.15e-06	-3.85746	down	--	--	Molecular Function: serine-type carboxypeptidase activity (GO:0004185);; Biological Process: proteolysis (GO:0006508);;	--	sp|Q9LSV8|SCP21_ARATH Serine carboxypeptidase-like 21 OS=Arabidopsis thaliana GN=SCPL21 PE=2 SV=2	Serine carboxypeptidase, putative GN=RCOM_1383690 OS=Ricinus communis (Castor bean) PE=4 SV=1	gi|255562246|ref|XP_002522131.1| serine carboxypeptidase, putative [Ricinus communis]	Ricinus communis serine carboxypeptidase, putative, mRNA
Maple_Unigene_BMK.18176	0	-3.8507	down	--	--	--	--	sp|Q9LY05|EF106_ARATH Ethylene-responsive transcription factor ERF106 OS=Arabidopsis thaliana GN=ERF106 PE=2 SV=1	DNA binding protein, putative GN=RCOM_1501800 OS=Ricinus communis (Castor bean) PE=4 SV=1	gi|255539893|ref|XP_002511011.1| DNA binding protein, putative [Ricinus communis]	Malus x domestica AP2 domain class transcription factor (AP2D47) mRNA, complete cds
Maple_Unigene_BMK.185	1.35e-07	-3.84943	down	[S]	Function unknown	Cellular Component: cell wall (GO:0005618);; Biological Process: defense response (GO:0006952);; Biological Process: signal transduction (GO:0007165);; Cellular Component: plasmodesma (GO:0009506);; Cellular Component: chloroplast (GO:0009507);; Cellular Component: membrane (GO:0016020);; Molecular Function: kinase activity (GO:0016301);; Biological Process: phosphorylation (GO:0016310);; Molecul…	--	sp|Q00874|DR100_ARATH DNA-damage-repair/toleration protein DRT100 OS=Arabidopsis thaliana GN=DRT100 PE=2 SV=2	Predicted protein GN=POPTRDRAFT_722744 OS=Populus trichocarpa (Western balsam poplar) PE=4 SV=1	gi|118484783|gb|ABK94260.1| unknown [Populus trichocarpa]	Glycine max cDNA, clone: GMFL01-25-M10
Maple_Unigene_BMK.42475	1.35e-07	-3.84943	down	--	--	--	--	sp|Q766C2|NEP2_NEPGR Aspartic proteinase nepenthesin-2 OS=Nepenthes gracilis GN=nep2 PE=1 SV=1	Putative uncharacterized protein GN=VIT_04s0008g07140 OS=Vitis vinifera (Grape) PE=4 SV=1	gi|147809812|emb|CAN71447.1| hypothetical protein VITISV_040904 [Vitis vinifera]	--
Maple_Unigene_BMK.34569	4.44e-15	-3.83645	down	[S]	Function unknown	Biological Process: defense response (GO:0006952);; Molecular Function: hydrolase activity (GO:0016787);; Molecular Function: ADP binding (GO:0043531);;	--	sp|Q39214|RPM1_ARATH Disease resistance protein RPM1 OS=Arabidopsis thaliana GN=RPM1 PE=1 SV=1	Nbs-lrr resistance protein GN=POPTRDRAFT_590080 OS=Populus trichocarpa (Western balsam poplar) PE=4 SV=1	gi|224138292|ref|XP_002326566.1| nbs-lrr resistance protein [Populus trichocarpa]	Populus trichocarpa nbs-lrr resistance protein, mRNA
Maple_Unigene_BMK.24653	2.33e-15	-3.83567	down	--	--	Cellular Component: cell wall (GO:0005618);; Cellular Component: plasma membrane (GO:0005886);; Biological Process: oxygen transport (GO:0015671);; Molecular Function: oxygen binding (GO:0019825);; Molecular Function: heme binding (GO:0020037);;	--	sp|Q9FVL0|HBL1_MEDSA Non-symbiotic hemoglobin 1 OS=Medicago sativa GN=MHB1 PE=2 SV=1	Putative uncharacterized protein GN=VIT_03s0063g01970 OS=Vitis vinifera (Grape) PE=3 SV=1	gi|225428578|ref|XP_002284669.1| PREDICTED: similar to non-symbiotic hemoglobin class 1 [Vitis vinifera]	Citrus unshiu non-symbiotic hemoglobin class 1 (Glb1) mRNA, complete cds
Maple_Unigene_BMK.21570	7.77e-16	-3.82794	down	--	--	Molecular Function: structural constituent of cell wall (GO:0005199);; Biological Process: response to organic substance (GO:0010033);; Biological Process: cellular component organization (GO:0016043);; Biological Process: cellular component organization or biogenesis at cellular level (GO:0071841);;	--	sp|Q9FS16|EXTN3_ARATH Extensin-3 OS=Arabidopsis thaliana GN=EXT3 PE=2 SV=2	Predicted protein GN=POPTRDRAFT_761027 OS=Populus trichocarpa (Western balsam poplar) PE=4 SV=1	gi|224082422|ref|XP_002306688.1| predicted protein [Populus trichocarpa]	Populus trichocarpa predicted protein, mRNA
Maple_Unigene_BMK.30350	1.97e-07	-3.81973	down	[S]	Function unknown	Molecular Function: catalytic activity (GO:0003824);;	--	sp|Q9FRS6|PXL1_ARATH Leucine-rich repeat receptor-like protein kinase PXL1 OS=Arabidopsis thaliana GN=PXL1 PE=2 SV=1	Serine-threonine protein kinase, plant-type, putative GN=RCOM_1371710 OS=Ricinus communis (Castor bean) PE=4 SV=1	gi|255581263|ref|XP_002531443.1| serine-threonine protein kinase, plant-type, putative [Ricinus communis]	--
Maple_Unigene_BMK.14199	0.00622094	-3.81476	down	--	--	Molecular Function: iron ion binding (GO:0005506);; Cellular Component: chloroplast thylakoid membrane (GO:0009535);; Cellular Component: chloroplast stroma (GO:0009570);; Biological Process: response to wounding (GO:0009611);; Biological Process: response to fungus (GO:0009620);; Biological Process: jasmonic acid biosynthetic process (GO:0009695);; Biological Process: response to jasmonic acid s…	--	sp|P93184|LOX21_HORVU Lipoxygenase 2.1, chloroplastic OS=Hordeum vulgare GN=LOX2.1 PE=1 SV=1	Lipoxygenase GN=RCOM_1576890 OS=Ricinus communis (Castor bean) PE=3 SV=1	gi|255544764|ref|XP_002513443.1| lipoxygenase, putative [Ricinus communis]	Camellia sinensis lipoxygenase mRNA, complete cds
Maple_Unigene_BMK.25292	0	-3.7967	down	--	--	Molecular Function: receptor activity (GO:0004872);; Molecular Function: protein binding (GO:0005515);; Cellular Component: nucleus (GO:0005634);; Cellular Component: cytoplasm (GO:0005737);; Biological Process: abscisic acid mediated signaling pathway (GO:0009738);; Biological Process: regulation of seed germination (GO:0010029);; Molecular Function: abscisic acid binding (GO:0010427);;	K14496|5e-90|rcu:RCOM_0687410|abscisic acid receptor PYR/PYL family	sp|O80920|PYL4_ARATH Abscisic acid receptor PYL4 OS=Arabidopsis thaliana GN=PYL4 PE=1 SV=1	Putative uncharacterized protein GN=RCOM_0687410 OS=Ricinus communis (Castor bean) PE=4 SV=1	gi|255559545|ref|XP_002520792.1| conserved hypothetical protein [Ricinus communis]	Vitis vinifera contig VV78X108399.4, whole genome shotgun sequence
Maple_Unigene_BMK.22312	2.49e-08	-3.79552	down	--	--	Molecular Function: catalytic activity (GO:0003824);; Biological Process: response to stress (GO:0006950);; Biological Process: signal transduction (GO:0007165);; Biological Process: cellular response to organic substance (GO:0071310);;	--	sp|Q9ZWC8|BRL1_ARATH Serine/threonine-protein kinase BRI1-like 1 OS=Arabidopsis thaliana GN=BRL1 PE=1 SV=1	Putative uncharacterized protein GN=VIT_12s0057g00860 OS=Vitis vinifera (Grape) PE=4 SV=1	gi|147804670|emb|CAN66864.1| hypothetical protein VITISV_022039 [Vitis vinifera]	--
Maple_Unigene_BMK.13561	3.52e-08	-3.77046	down	[G]	Carbohydrate transport and metabolism	Molecular Function: hydrolase activity, hydrolyzing O-glycosyl compounds (GO:0004553);; Biological Process: cellular glucan metabolic process (GO:0006073);; Cellular Component: plant-type cell wall (GO:0009505);; Cellular Component: chloroplast (GO:0009507);; Biological Process: response to mechanical stimulus (GO:0009612);; Biological Process: response to low light intensity stimulus (GO:0009645…	K08235|0.0|pop:POPTR_708892|xyloglucan:xyloglucosyl transferase [EC:2.4.1.207]	sp|Q8LNZ5|XTHB_PHAAN Probable xyloglucan endotransglucosylase/hydrolase protein B OS=Phaseolus angularis GN=XTHB PE=2 SV=1	Predicted protein GN=POPTRDRAFT_708892 OS=Populus trichocarpa (Western balsam poplar) PE=4 SV=1	gi|224053607|ref|XP_002297895.1| predicted protein [Populus trichocarpa]	Shorea parvifolia subsp. parvifolia xyloglucan endotransglycosylase (XET1) mRNA, complete cds
Maple_Unigene_BMK.28052	4.14e-11	-3.76384	down	--	--	Biological Process: carbohydrate metabolic process (GO:0005975);; Molecular Function: cellulase activity (GO:0008810);;	--	sp|Q7XUK4|GUN12_ORYSJ Endoglucanase 12 OS=Oryza sativa subsp. japonica GN=GLU3 PE=2 SV=2	Endo-1,4-beta-glucanase GN=EG2 OS=Dimocarpus longan PE=2 SV=1	gi|254031739|gb|ACT54547.1| endo-1,4-beta-glucanase [Dimocarpus longan]	Dimocarpus longan endo-1,4-beta-glucanase (EG2) mRNA, complete cds
Maple_Unigene_BMK.9296	0.000162696	-3.76139	down	--	--	--	--	sp|Q32L04|LELP1_BOVIN Late cornified envelope-like proline-rich protein 1 OS=Bos taurus GN=LELP1 PE=3 SV=1	Antimicrobial peptide shep-GRP GN=GRP OS=Capsella bursa-pastoris (Shepherd's purse) PE=2 SV=1	gi|9957568|gb|AAG09424.1|AF180444_1 antimicrobial peptide shep-GRP [Capsella bursa-pastoris]	--
Maple_Unigene_BMK.22495	2.52e-10	-3.74026	down	--	--	Biological Process: polysaccharide catabolic process (GO:0000272);; Biological Process: starch metabolic process (GO:0005982);; Biological Process: glycerol metabolic process (GO:0006071);; Biological Process: lipid metabolic process (GO:0006629);; Biological Process: cell adhesion (GO:0007155);; Molecular Function: glycerophosphodiester phosphodiesterase activity (GO:0008889);; Cellular Componen…	--	sp|Q7Y208|GLPQ3_ARATH Probable glycerophosphoryl diester phosphodiesterase 3 OS=Arabidopsis thaliana GN=GPDL3 PE=1 SV=2	Predicted protein (Fragment) GN=POPTRDRAFT_175989 OS=Populus trichocarpa (Western balsam poplar) PE=4 SV=1	gi|224061111|ref|XP_002300351.1| predicted protein [Populus trichocarpa]	--
Maple_Unigene_BMK.29058	6.33e-07	-3.72676	down	--	--	Molecular Function: endopeptidase inhibitor activity (GO:0004866);; Cellular Component: cell wall (GO:0005618);; Biological Process: negative regulation of endopeptidase activity (GO:0010951);; Cellular Component: apoplast (GO:0048046);;	--	sp|P13087|MIRA_RICDU Miraculin OS=Richadella dulcifica PE=1 SV=3	Putative uncharacterized protein GN=VITISV_027379 OS=Vitis vinifera (Grape) PE=4 SV=1	gi|147805678|emb|CAN65022.1| hypothetical protein VITISV_027379 [Vitis vinifera]	PREDICTED: Vitis vinifera hypothetical protein LOC100250188 (LOC100250188), mRNA
Maple_Unigene_BMK.15189	0.000273581	-3.70266	down	--	--	Cellular Component: cytosol (GO:0005829);; Cellular Component: plasma membrane (GO:0005886);; Biological Process: transport (GO:0006810);; Cellular Component: chloroplast (GO:0009507);; Cellular Component: integral to membrane (GO:0016021);;	--	sp|Q56Z59|PATL3_ARATH Patellin-3 OS=Arabidopsis thaliana GN=PATL3 PE=1 SV=2	Putative uncharacterized protein GN=VIT_07s0031g03220 OS=Vitis vinifera (Grape) PE=4 SV=1	gi|224122762|ref|XP_002330469.1| predicted protein [Populus trichocarpa]	Populus trichocarpa predicted protein, mRNA
Maple_Unigene_BMK.14180	0	-3.69386	down	--	--	Molecular Function: iron ion binding (GO:0005506);; Cellular Component: chloroplast thylakoid membrane (GO:0009535);; Cellular Component: chloroplast stroma (GO:0009570);; Biological Process: response to wounding (GO:0009611);; Biological Process: response to fungus (GO:0009620);; Biological Process: jasmonic acid biosynthetic process (GO:0009695);; Biological Process: response to jasmonic acid s…	--	sp|P38418|LOX2_ARATH Lipoxygenase 2, chloroplastic OS=Arabidopsis thaliana GN=LOX2 PE=1 SV=1	Lipoxygenase GN=LOX1 OS=Populus deltoides (Eastern poplar) PE=2 SV=1	gi|71999169|gb|AAZ57444.1| lipoxygenase LOX1 [Populus deltoides]	Citrus jambhiri mRNA for lipoxygenase, complete cds
Maple_Unigene_BMK.32013	0	-3.6915	down	--	--	Biological Process: cell morphogenesis involved in differentiation (GO:0000904);; Molecular Function: catalytic activity (GO:0003824);; Molecular Function: structural constituent of cell wall (GO:0005199);; Molecular Function: protein binding (GO:0005515);; Cellular Component: plant-type cell wall (GO:0009505);; Cellular Component: plasmodesma (GO:0009506);; Biological Process: unidimensional cel…	--	sp|Q9T0K5|LRX3_ARATH Leucine-rich repeat extensin-like protein 3 OS=Arabidopsis thaliana GN=LRX3 PE=1 SV=1	Putative uncharacterized protein GN=VIT_11s0016g04190 OS=Vitis vinifera (Grape) PE=4 SV=1	gi|15235668|ref|NP_193070.1| leucine-rich repeat family protein / extensin family protein [Arabidopsis thaliana]	Populus trichocarpa clone POP092-M04, complete sequence
Maple_Unigene_BMK.23065	1.23e-14	-3.66617	down	--	--	Biological Process: metabolic process (GO:0008152);; Molecular Function: glucuronosyltransferase activity (GO:0015020);; Molecular Function: anthocyanidin 3-O-glucosyltransferase activity (GO:0047213);; Molecular Function: trans-zeatin O-beta-D-glucosyltransferase activity (GO:0050403);; Molecular Function: cis-zeatin O-beta-D-glucosyltransferase activity (GO:0050502);;	--	sp|Q9SK82|COGT2_ARATH Cytokinin-O-glucosyltransferase 2 OS=Arabidopsis thaliana GN=UGT85A1 PE=1 SV=1	Predicted protein GN=POPTRDRAFT_1071736 OS=Populus trichocarpa (Western balsam poplar) PE=4 SV=1	gi|224066971|ref|XP_002302305.1| predicted protein [Populus trichocarpa]	Vitis vinifera contig VV78X104977.5, whole genome shotgun sequence
Maple_Unigene_BMK.3013	1.45e-07	-3.66563	down	--	--	Molecular Function: hydrolase activity, hydrolyzing O-glycosyl compounds (GO:0004553);; Cellular Component: cell wall (GO:0005618);; Biological Process: cellular glucan metabolic process (GO:0006073);; Molecular Function: xyloglucan:xyloglucosyl transferase activity (GO:0016762);; Cellular Component: apoplast (GO:0048046);;	K08235|2e-59|pop:POPTR_711461|xyloglucan:xyloglucosyl transferase [EC:2.4.1.207]	sp|P35694|BRU1_SOYBN Brassinosteroid-regulated protein BRU1 OS=Glycine max PE=2 SV=1	Xyloglucan endotransglycosylase 3 GN=XET3 OS=Litchi chinensis (Lychee) PE=2 SV=1	gi|116871386|gb|ABK30789.1| xyloglucan endotransglycosylase 3 [Litchi chinensis]	Litchi chinensis xyloglucan endotransglycosylase 3 (XET3) mRNA, complete cds
Maple_Unigene_BMK.26836	1.98e-05	-3.65433	down	[RTKL]	--	Molecular Function: protein serine/threonine kinase activity (GO:0004674);; Molecular Function: ATP binding (GO:0005524);; Biological Process: protein phosphorylation (GO:0006468);; Biological Process: recognition of pollen (GO:0048544);; Biological Process: regulation of cellular process (GO:0050794);;	--	sp|Q8RWZ5|SD25_ARATH G-type lectin S-receptor-like serine/threonine-protein kinase SD2-5 OS=Arabidopsis thaliana GN=SD25 PE=1 SV=1	Putative uncharacterized protein GN=VIT_12s0028g01640 OS=Vitis vinifera (Grape) PE=3 SV=1	gi|225446687|ref|XP_002277429.1| PREDICTED: hypothetical protein [Vitis vinifera]	PREDICTED: Vitis vinifera hypothetical protein LOC100267773 (LOC100267773), mRNA
Maple_Unigene_BMK.10401	0	-3.64124	down	[O]	Posttranslational modification, protein turnover, chaperones	Molecular Function: protein binding (GO:0005515);; Cellular Component: nucleus (GO:0005634);; Biological Process: response to stress (GO:0006950);; Cellular Component: plastid (GO:0009536);; Biological Process: response to sucrose stimulus (GO:0009744);; Biological Process: response to fructose stimulus (GO:0009750);;	--	sp|Q9FYB5|DNJ11_ARATH Chaperone protein dnaJ 11, chloroplastic OS=Arabidopsis thaliana GN=ATJ11 PE=1 SV=2	DnaJ-like protein (Fragment) OS=Phaseolus vulgaris (Kidney bean) PE=2 SV=1	gi|1684851|gb|AAB36543.1| DnaJ-like protein [Phaseolus vulgaris]	Arabidopsis thaliana DNAJ heat shock protein, putative (AT2G17880) mRNA, complete cds
Maple_Unigene_BMK.12091	3.12e-05	-3.61003	down	--	--	Biological Process: fatty acid biosynthetic process (GO:0006633);; Biological Process: response to temperature stimulus (GO:0009266);; Cellular Component: chloroplast envelope (GO:0009941);; Molecular Function: oxidoreductase activity, acting on paired donors, with incorporation or reduction of molecular oxygen (GO:0016705);;	K10257|7e-16|rcu:RCOM_0186970|omega-3 fatty acid desaturase (delta-15 desaturase) [EC:1.14.19.-]	sp|P48619|FAD3C_RICCO Omega-3 fatty acid desaturase, chloroplastic OS=Ricinus communis GN=FAD7A-1 PE=2 SV=1	Omega-3 fatty acid desaturase (Fragment) OS=Vernicia fordii (Tung) PE=2 SV=1	gi|4240385|gb|AAD13527.1| omega-3 fatty acid desaturase precursor [Vernicia fordii]	Populus trichocarpa predicted protein, mRNA
Maple_Unigene_BMK.21110	3.12e-05	-3.61003	down	--	--	Molecular Function: transferase activity, transferring phosphorus-containing groups (GO:0016772);;	--	sp|C0LGF5|Y1341_ARATH Probable LRR receptor-like serine/threonine-protein kinase At1g34110 OS=Arabidopsis thaliana GN=At1g34110 PE=2 SV=2	Putative uncharacterized protein GN=VITISV_039533 OS=Vitis vinifera (Grape) PE=4 SV=1	gi|147852480|emb|CAN78527.1| hypothetical protein VITISV_039533 [Vitis vinifera]	--
Maple_Unigene_BMK.12304	3.31e-11	-3.57936	down	--	--	Cellular Component: exocyst (GO:0000145);; Cellular Component: nucleus (GO:0005634);; Cellular Component: cytosol (GO:0005829);; Biological Process: vesicle docking involved in exocytosis (GO:0006904);; Cellular Component: pollen tube (GO:0090406);;	K07195|4e-87|pop:POPTR_561517|exocyst complex component 7	--	Predicted protein GN=POPTRDRAFT_561517 OS=Populus trichocarpa (Western balsam poplar) PE=4 SV=1	gi|224088585|ref|XP_002308485.1| predicted protein [Populus trichocarpa]	TSA: Cajanus cajan cultivar UPAS 120 contig08431.UPAS mRNA sequence
Maple_Unigene_BMK.35209	0	-3.57925	down	--	--	Biological Process: cellular process (GO:0009987);;	--	sp|Q9LW50|ERF2_NICSY Ethylene-responsive transcription factor 2 OS=Nicotiana sylvestris GN=ERF2 PE=2 SV=1	AP2/ERF domain-containing transcription factor GN=ERF13 OS=Populus trichocarpa (Western balsam poplar) PE=4 SV=1	gi|224075319|ref|XP_002304592.1| AP2/ERF domain-containing transcription factor [Populus trichocarpa]	Actinidia deliciosa ethylene response factor 12 (ERF12) mRNA, complete cds
Maple_Unigene_BMK.24255	1.59e-08	-3.56851	down	--	--	--	--	sp|P14381|YTX2_XENLA Transposon TX1 uncharacterized 149 kDa protein OS=Xenopus laevis PE=4 SV=1	Putative uncharacterized protein OS=Beta vulgaris subsp. vulgaris PE=4 SV=1	gi|222629449|gb|EEE61581.1| hypothetical protein OsJ_15963 [Oryza sativa Japonica Group]	--
Maple_Unigene_BMK.2576	4.94e-05	-3.56433	down	--	--	Molecular Function: sequence-specific DNA binding transcription factor activity (GO:0003700);; Molecular Function: sequence-specific DNA binding (GO:0043565);; Biological Process: cellular metabolic process (GO:0044237);;	--	sp|Q8VWJ2|WRK28_ARATH Probable WRKY transcription factor 28 OS=Arabidopsis thaliana GN=WRKY28 PE=2 SV=1	Predicted protein GN=POPTRDRAFT_816178 OS=Populus trichocarpa (Western balsam poplar) PE=4 SV=1	gi|224066567|ref|XP_002302140.1| predicted protein [Populus trichocarpa]	Populus trichocarpa predicted protein, mRNA
Maple_Unigene_BMK.17415	4.94e-05	-3.56433	down	[G]	Carbohydrate transport and metabolism	Biological Process: phloem or xylem histogenesis (GO:0010087);; Biological Process: leaf vascular tissue pattern formation (GO:0010305);; Biological Process: cotyledon vascular tissue pattern formation (GO:0010588);; Biological Process: leaf development (GO:0048366);;	--	sp|P09789|GRP1_PETHY Glycine-rich cell wall structural protein 1 OS=Petunia hybrida GN=GRP-1 PE=1 SV=1	Predicted protein GN=POPTRDRAFT_590015 OS=Populus trichocarpa (Western balsam poplar) PE=4 SV=1	gi|224138928|ref|XP_002326725.1| predicted protein [Populus trichocarpa]	Populus trichocarpa predicted protein, mRNA
Maple_Unigene_BMK.33146	0	-3.53746	down	--	--	--	--	sp|P0CI03|PTR28_ARATH Putative peptide/nitrate transporter At2g37900 OS=Arabidopsis thaliana GN=At2g37900 PE=2 SV=1	Putative uncharacterized protein GN=VIT_08s0007g02020 OS=Vitis vinifera (Grape) PE=4 SV=1	gi|297740232|emb|CBI30414.3| unnamed protein product [Vitis vinifera]	--
Maple_Unigene_BMK.44593	0	-3.51077	down	--	--	Molecular Function: hydrolase activity, hydrolyzing O-glycosyl compounds (GO:0004553);; Cellular Component: cell wall (GO:0005618);; Biological Process: cellular glucan metabolic process (GO:0006073);; Biological Process: response to water deprivation (GO:0009414);; Molecular Function: xyloglucan:xyloglucosyl transferase activity (GO:0016762);; Cellular Component: apoplast (GO:0048046);;	K08235|1e-177|pop:POPTR_718004|xyloglucan:xyloglucosyl transferase [EC:2.4.1.207]	sp|Q8LF99|XTH6_ARATH Probable xyloglucan endotransglucosylase/hydrolase protein 6 OS=Arabidopsis thaliana GN=XTH6 PE=2 SV=2	Putative xyloglucan endotransglucosylase/hydrolase GN=XTH2 OS=Gossypium hirsutum (Upland cotton) PE=4 SV=1	gi|308229792|gb|ADO24304.1| putative xyloglucan endotransglucosylase/hydrolase [Gossypium hirsutum]	Gossypium hirsutum cultivar Coker 312 xyloglucan endotransglucosylase/hydrolase (XTH2) mRNA, complete cds
Maple_Unigene_BMK.16534	0.00134563	-3.51063	down	[L]	Replication, recombination and repair	Biological Process: base-excision repair (GO:0006284);; Biological Process: DNA methylation (GO:0006306);; Molecular Function: DNA-3-methyladenine glycosylase activity (GO:0008725);; Biological Process: response to blue light (GO:0009637);; Biological Process: regulation of proton transport (GO:0010155);; Biological Process: protein autophosphorylation (GO:0046777);;	K01246|5e-16|vvi:100256507|DNA-3-methyladenine glycosylase I [EC:3.2.2.20]	--	Putative uncharacterized protein GN=VIT_01s0010g00020 OS=Vitis vinifera (Grape) PE=4 SV=1	gi|225424952|ref|XP_002263612.1| PREDICTED: hypothetical protein [Vitis vinifera]	Solanum lycopersicum cDNA, clone: LEFL3145E24, HTC in root
Maple_Unigene_BMK.31244	7.77e-15	-3.49983	down	[RTKL]	--	Molecular Function: protein serine/threonine kinase activity (GO:0004674);; Molecular Function: protein tyrosine kinase activity (GO:0004713);; Molecular Function: ATP binding (GO:0005524);; Biological Process: protein phosphorylation (GO:0006468);; Cellular Component: cytoplasmic membrane-bounded vesicle (GO:0016023);;	--	sp|Q9LMN7|WAK5_ARATH Wall-associated receptor kinase 5 OS=Arabidopsis thaliana GN=WAK5 PE=1 SV=1	Serine/threonine protein kinase, putative GN=RCOM_0680330 OS=Ricinus communis (Castor bean) PE=4 SV=1	gi|255551685|ref|XP_002516888.1| serine/threonine protein kinase, putative [Ricinus communis]	Ricinus communis serine/threonine protein kinase, putative, mRNA
Maple_Unigene_BMK.28178	3.82e-13	-3.49203	down	[H]	Coenzyme transport and metabolism	Molecular Function: methionine adenosyltransferase activity (GO:0004478);; Molecular Function: ATP binding (GO:0005524);; Cellular Component: cell wall (GO:0005618);; Cellular Component: nucleolus (GO:0005730);; Cellular Component: cytoplasm (GO:0005737);; Cellular Component: plasma membrane (GO:0005886);; Biological Process: methionine metabolic process (GO:0006555);; Biological Process: S-adeno…	K00789|0.0|vvi:100244176|S-adenosylmethionine synthetase [EC:2.5.1.6]	sp|Q84MM2|METK_LITCN S-adenosylmethionine synthase OS=Litchi chinensis GN=SAMS PE=2 SV=1	S-adenosylmethionine synthase GN=RCOM_1436370 OS=Ricinus communis (Castor bean) PE=3 SV=1	gi|75297911|sp|Q84MM2.1|METK_LITCN RecName: Full=S-adenosylmethionine synthase; Short=AdoMet synthase; AltName: Full=Methionine adenosyltransferase; Short=MAT	Litchi chinensis S-adenosylmethionine synthetase (SAMS) mRNA, complete cds
Maple_Unigene_BMK.25504	0	-3.49164	down	--	--	Molecular Function: ubiquitin-protein ligase activity (GO:0004842);; Molecular Function: protein binding (GO:0005515);; Cellular Component: nucleus (GO:0005634);; Biological Process: ubiquitin-dependent protein catabolic process (GO:0006511);; Biological Process: response to auxin stimulus (GO:0009733);; Biological Process: negative regulation of ethylene mediated signaling pathway (GO:0010105);;…	--	sp|Q708Y0|EBF2_ARATH EIN3-binding F-box protein 2 OS=Arabidopsis thaliana GN=EBF2 PE=1 SV=1	Ein3-binding f-box protein 4 GN=EBF4 OS=Populus trichocarpa (Western balsam poplar) PE=4 SV=1	gi|224090409|ref|XP_002308982.1| ein3-binding f-box protein 4 [Populus trichocarpa]	Populus trichocarpa ein3-binding f-box protein 4 (EBF4), mRNA
Maple_Unigene_BMK.19731	0	-3.47252	down	--	--	Cellular Component: membrane (GO:0016020);;	--	sp|Q9M331|PTR45_ARATH Probable peptide/nitrate transporter At3g53960 OS=Arabidopsis thaliana GN=At3g53960 PE=2 SV=2	Putative uncharacterized protein GN=VIT_08s0007g02020 OS=Vitis vinifera (Grape) PE=4 SV=1	gi|297740232|emb|CBI30414.3| unnamed protein product [Vitis vinifera]	--
Maple_Unigene_BMK.18018	0.000125763	-3.46834	down	--	--	Molecular Function: AT DNA binding (GO:0003680);; Molecular Function: double-stranded DNA binding (GO:0003690);; Molecular Function: sequence-specific DNA binding transcription factor activity (GO:0003700);; Cellular Component: nucleus (GO:0005634);; Biological Process: chromatin organization (GO:0006325);; Biological Process: photomorphogenesis (GO:0009640);; Biological Process: embryo developme…	--	sp|Q9S7C9|ESCA_ARATH Putative DNA-binding protein ESCAROLA OS=Arabidopsis thaliana GN=ESC PE=2 SV=1	DNA binding protein, putative GN=RCOM_1602220 OS=Ricinus communis (Castor bean) PE=4 SV=1	gi|225457666|ref|XP_002273442.1| PREDICTED: hypothetical protein [Vitis vinifera]	Ricinus communis DNA binding protein, putative, mRNA
Maple_Unigene_BMK.23871	0	-3.45218	down	[T]	Signal transduction mechanisms	Molecular Function: protein serine/threonine phosphatase activity (GO:0004722);; Cellular Component: cytosol (GO:0005829);; Molecular Function: kinase activity (GO:0016301);; Biological Process: phosphorylation (GO:0016310);;	--	sp|Q9FX08|P2C12_ARATH Probable protein phosphatase 2C 12 OS=Arabidopsis thaliana GN=At1g47380 PE=2 SV=1	mRNA, clone: RTFL01-28-G13 OS=Thellungiella halophila (Salt cress) PE=2 SV=1	gi|312283003|dbj|BAJ34367.1| unnamed protein product [Thellungiella halophila]	PREDICTED: Vitis vinifera hypothetical protein LOC100260807 (LOC100260807), mRNA
Maple_Unigene_BMK.33125	4.09e-07	-3.44648	down	--	--	Molecular Function: catalytic activity (GO:0003824);;	--	sp|Q05091|PGIP_PYRCO Polygalacturonase inhibitor OS=Pyrus communis GN=PGIP PE=1 SV=1	Predicted protein GN=POPTRDRAFT_588091 OS=Populus trichocarpa (Western balsam poplar) PE=4 SV=1	gi|224145105|ref|XP_002336200.1| predicted protein [Populus trichocarpa]	--
Maple_Unigene_BMK.13413	0.0023139	-3.44048	down	--	--	Cellular Component: Golgi apparatus (GO:0005794);; Molecular Function: cellulose synthase (UDP-forming) activity (GO:0016760);; Molecular Function: mannan synthase activity (GO:0051753);;	K13680|1e-22|rcu:RCOM_1186280|beta-mannan synthase [EC:2.4.1.32]	sp|Q9FNI7|CSLA2_ARATH Glucomannan 4-beta-mannosyltransferase 2 OS=Arabidopsis thaliana GN=CSLA2 PE=2 SV=1	Transferase, transferring glycosyl groups, putative GN=RCOM_1186280 OS=Ricinus communis (Castor bean) PE=4 SV=1	gi|255573030|ref|XP_002527445.1| transferase, transferring glycosyl groups, putative [Ricinus communis]	Ricinus communis transferase, transferring glycosyl groups, putative, mRNA
Maple_Unigene_BMK.16806	0.0023139	-3.44048	down	[M]	Cell wall/membrane/envelope biogenesis	Molecular Function: polygalacturonase activity (GO:0004650);; Cellular Component: extracellular region (GO:0005576);; Cellular Component: vacuole (GO:0005773);; Biological Process: carbohydrate metabolic process (GO:0005975);; Biological Process: calcium ion transport (GO:0006816);; Biological Process: Golgi organization (GO:0007030);; Biological Process: cellular cell wall organization (GO:00070…	--	sp|A7PZL3|PGLR_VITVI Probable polygalacturonase OS=Vitis vinifera GN=GSVIVT00026920001 PE=1 SV=1	Putative uncharacterized protein GN=VIT_05s0077g01740 OS=Vitis vinifera (Grape) PE=4 SV=1	gi|225431820|ref|XP_002273305.1| PREDICTED: hypothetical protein [Vitis vinifera]	Ricinus communis Polygalacturonase, putative, mRNA
Maple_Unigene_BMK.25584	0.0023139	-3.44048	down	[PR]	--	Molecular Function: electron carrier activity (GO:0009055);; Cellular Component: chloroplast envelope (GO:0009941);; Molecular Function: chlorophyllide a oxygenase [overall] activity (GO:0010277);; Molecular Function: metal ion binding (GO:0046872);; Molecular Function: 2 iron, 2 sulfur cluster binding (GO:0051537);; Biological Process: oxidation-reduction process (GO:0055114);;	--	sp|Q9FYC2|PAO_ARATH Pheophorbide a oxygenase, chloroplastic OS=Arabidopsis thaliana GN=PAO PE=1 SV=1	Predicted protein GN=POPTRDRAFT_555212 OS=Populus trichocarpa (Western balsam poplar) PE=4 SV=1	gi|224075992|ref|XP_002304862.1| predicted protein [Populus trichocarpa]	Populus trichocarpa predicted protein, mRNA
Maple_Unigene_BMK.8401	0.0023139	-3.44048	down	--	--	--	--	--	Predicted protein GN=POPTRDRAFT_1106310 OS=Populus trichocarpa (Western balsam poplar) PE=4 SV=1	gi|224142001|ref|XP_002324349.1| predicted protein [Populus trichocarpa]	--
Maple_Unigene_BMK.35744	2.77e-06	-3.4299	down	[S]	Function unknown	Biological Process: metabolic process (GO:0008152);; Cellular Component: cytoplasmic membrane-bounded vesicle (GO:0016023);; Molecular Function: kinase activity (GO:0016301);;	--	sp|Q9C9H7|RLP12_ARATH Receptor-like protein 12 OS=Arabidopsis thaliana GN=RLP12 PE=2 SV=1	Serine/threonine-protein kinase bri1, putative GN=RCOM_0920670 OS=Ricinus communis (Castor bean) PE=4 SV=1	gi|255548694|ref|XP_002515403.1| serine/threonine-protein kinase bri1, putative [Ricinus communis]	--
Maple_Unigene_BMK.21942	0.00020187	-3.41784	down	--	--	Cellular Component: endoplasmic reticulum (GO:0005783);; Biological Process: response to auxin stimulus (GO:0009733);; Biological Process: brassinosteroid mediated signaling pathway (GO:0009742);; Biological Process: cell growth (GO:0016049);; Biological Process: regulation of cell proliferation (GO:0042127);; Biological Process: positive regulation of organ growth (GO:0046622);; Biological Proce…	--	--	Predicted protein GN=POPTRDRAFT_560379 OS=Populus trichocarpa (Western balsam poplar) PE=4 SV=1	gi|224086805|ref|XP_002307970.1| predicted protein [Populus trichocarpa]	--
Maple_Unigene_BMK.23731	1.42e-11	-3.4141	down	[I]	Lipid transport and metabolism	Molecular Function: acetyl-CoA carboxylase activity (GO:0003989);; Molecular Function: ATP binding (GO:0005524);; Biological Process: fatty acid biosynthetic process (GO:0006633);; Cellular Component: acetyl-CoA carboxylase complex (GO:0009317);; Cellular Component: chloroplast stroma (GO:0009570);; Molecular Function: transferase activity (GO:0016740);; Molecular Function: metal ion binding (GO:…	--	sp|B1A944|ACCD_CARPA Acetyl-coenzyme A carboxylase carboxyl transferase subunit beta, chloroplastic OS=Carica papaya GN=accD PE=3 SV=1	Acetyl-CoA carboxylase carboxyltransferase beta subunit protein GN=accD OS=Staphylea colchica PE=3 SV=1	gi|167391814|ref|YP_001671692.1| acetyl-CoA carboxylase beta subunit [Carica papaya]	Staphylea colchica voucher FLAS:D.E. and P.S. Soltis 2711 acetyl-CoA carboxylase carboxyltransferase beta subunit protein (accD) gene, complete cds; chloroplast
Maple_Unigene_BMK.35372	1.67e-15	-3.40682	down	[J]	Translation, ribosomal structure and biogenesis	Molecular Function: nucleotide binding (GO:0000166);; Cellular Component: plastid small ribosomal subunit (GO:0000312);; Molecular Function: structural constituent of ribosome (GO:0003735);; Molecular Function: ketol-acid reductoisomerase activity (GO:0004455);; Cellular Component: mitochondrial small ribosomal subunit (GO:0005763);; Biological Process: translation (GO:0006412);; Biological Proce…	--	sp|Q09MB7|RR7_CITSI 30S ribosomal protein S7, chloroplastic OS=Citrus sinensis GN=rps7-A PE=3 SV=1	Ribosomal protein S7 GN=MTR_3g035660 OS=Medicago truncatula (Barrel medic) PE=3 SV=1	gi|114329701|ref|YP_740522.1| ribosomal protein S7 [Citrus sinensis]	Citrus sinensis chloroplast, complete genome
Maple_Unigene_BMK.2584	4.06e-06	-3.39753	down	--	--	--	--	sp|Q8LA14|PSK6_ARATH Putative phytosulfokines 6 OS=Arabidopsis thaliana GN=PSK6 PE=2 SV=2	Putative uncharacterized protein GN=VIT_08s0007g03870 OS=Vitis vinifera (Grape) PE=4 SV=1	gi|297740068|emb|CBI30250.3| unnamed protein product [Vitis vinifera]	Lotus japonicus genomic DNA, chromosome 5, clone: LjT01C14, TM0359, complete sequence
Maple_Unigene_BMK.15810	4.06e-06	-3.39753	down	--	--	--	--	--	Putative uncharacterized protein GN=VIT_01s0011g03650 OS=Vitis vinifera (Grape) PE=4 SV=1	gi|147778590|emb|CAN73469.1| hypothetical protein VITISV_000273 [Vitis vinifera]	Ricinus communis hypothetical protein, mRNA
Maple_Unigene_BMK.35378	0.00399945	-3.36675	down	--	--	Cellular Component: vacuole (GO:0005773);; Cellular Component: plasma membrane (GO:0005886);; Biological Process: chitin catabolic process (GO:0006032);; Molecular Function: chitin binding (GO:0008061);; Molecular Function: endochitinase activity (GO:0008843);; Biological Process: jasmonic acid and ethylene-dependent systemic resistance, ethylene mediated signaling pathway (GO:0009871);; Molecula…	--	sp|P06215|CHIT_PHAVU Endochitinase OS=Phaseolus vulgaris PE=1 SV=1	Predicted protein GN=POPTRDRAFT_557015 OS=Populus trichocarpa (Western balsam poplar) PE=4 SV=1	gi|224103095|ref|XP_002312923.1| predicted protein [Populus trichocarpa]	TSA: Arachis duranensis DurSNP_c2251.Ardu mRNA sequence
Maple_Unigene_BMK.13060	0.00399945	-3.36675	down	--	--	Cellular Component: plastid small ribosomal subunit (GO:0000312);; Molecular Function: structural constituent of ribosome (GO:0003735);; Molecular Function: protein binding (GO:0005515);; Cellular Component: mitochondrial small ribosomal subunit (GO:0005763);; Cellular Component: plasma membrane (GO:0005886);; Biological Process: generation of precursor metabolites and energy (GO:0006091);; Biolo…	--	sp|P27754|RT03_OENBE Ribosomal protein S3, mitochondrial OS=Oenothera berteriana GN=RPS3 PE=3 SV=2	Ribosomal protein S3 GN=MTR_1g005680 OS=Medicago truncatula (Barrel medic) PE=4 SV=1	gi|255590603|ref|XP_002535312.1| 60S ribosomal protein L16, putative [Ricinus communis]	Ricinus communis mitochondrion, complete genome
Maple_Unigene_BMK.21189	1.17e-06	-3.36413	down	[Q]	Secondary metabolites biosynthesis, transport and catabolism	Molecular Function: copper ion binding (GO:0005507);; Molecular Function: L-ascorbate oxidase activity (GO:0008447);; Cellular Component: plant-type cell wall (GO:0009505);; Cellular Component: membrane (GO:0016020);; Cellular Component: apoplast (GO:0048046);; Biological Process: oxidation-reduction process (GO:0055114);;	--	sp|Q00624|ASOL_BRANA L-ascorbate oxidase homolog OS=Brassica napus GN=Bp10 PE=2 SV=1	Multicopper oxidase GN=POPTRDRAFT_710960 OS=Populus trichocarpa (Western balsam poplar) PE=4 SV=1	gi|224061929|ref|XP_002300669.1| multicopper oxidase [Populus trichocarpa]	Medicago truncatula clone MTYFL_FM_FN_FO1G-A-4 unknown mRNA
Maple_Unigene_BMK.14278	5.55e-16	-3.34236	down	--	--	Biological Process: very long-chain fatty acid metabolic process (GO:0000038);; Cellular Component: endoplasmic reticulum (GO:0005783);; Biological Process: fatty acid biosynthetic process (GO:0006633);; Biological Process: response to cold (GO:0009409);; Biological Process: response to light stimulus (GO:0009416);; Cellular Component: membrane (GO:0016020);; Molecular Function: transferase activ…	--	sp|Q9SIB2|KCS12_ARATH 3-ketoacyl-CoA synthase 12 OS=Arabidopsis thaliana GN=KCS12 PE=2 SV=1	3-ketoacyl-CoA synthase OS=Gossypium hirsutum (Upland cotton) PE=2 SV=1	gi|159895657|gb|ABX10439.1| 3-ketoacyl-CoA synthase 3 [Gossypium hirsutum]	Populus trichocarpa beta-ketoacyl-coa synthase family protein, mRNA
Maple_Unigene_BMK.2760	1.66e-06	-3.3356	down	--	--	Molecular Function: receptor activity (GO:0004872);; Biological Process: tryptophan catabolic process (GO:0006569);; Biological Process: indoleacetic acid biosynthetic process (GO:0009684);; Biological Process: abscisic acid mediated signaling pathway (GO:0009738);; Biological Process: regulation of seed germination (GO:0010029);; Molecular Function: abscisic acid binding (GO:0010427);; Biologica…	K14496|1e-116|rcu:RCOM_0864530|abscisic acid receptor PYR/PYL family	sp|Q8VZS8|PYL1_ARATH Abscisic acid receptor PYL1 OS=Arabidopsis thaliana GN=PYL1 PE=1 SV=1	Putative uncharacterized protein GN=RCOM_0864530 OS=Ricinus communis (Castor bean) PE=4 SV=1	gi|255557579|ref|XP_002519819.1| conserved hypothetical protein [Ricinus communis]	Populus trichocarpa predicted protein, mRNA
Maple_Unigene_BMK.18183	1.16e-10	-3.32977	down	--	--	Biological Process: defense response (GO:0006952);;	--	--	Putative uncharacterized protein GN=RCOM_0811140 OS=Ricinus communis (Castor bean) PE=4 SV=1	gi|255555255|ref|XP_002518664.1| conserved hypothetical protein [Ricinus communis]	Populus tremula isolate swl504-63E peptidase M gene, partial cds
Maple_Unigene_BMK.35998	4.78e-10	-3.32515	down	--	--	--	--	sp|Q8LPB4|PSKR1_DAUCA Phytosulfokine receptor 1 OS=Daucus carota GN=PSKR PE=1 SV=1	Predicted protein GN=POPTRDRAFT_675740 OS=Populus trichocarpa (Western balsam poplar) PE=4 SV=1	gi|224114071|ref|XP_002332449.1| predicted protein [Populus trichocarpa]	Ricinus communis serine-threonine protein kinase, plant-type, putative, mRNA
Maple_Unigene_BMK.20546	6.34e-09	-3.31512	down	--	--	Cellular Component: ubiquitin ligase complex (GO:0000151);; Biological Process: MAPK cascade (GO:0000165);; Biological Process: respiratory burst involved in defense response (GO:0002679);; Molecular Function: ubiquitin-protein ligase activity (GO:0004842);; Cellular Component: cytosol (GO:0005829);; Biological Process: protein targeting to membrane (GO:0006612);; Biological Process: cellular mem…	--	sp|Q84TG3|PUB23_ARATH E3 ubiquitin-protein ligase PUB23 OS=Arabidopsis thaliana GN=PUB23 PE=1 SV=1	Spotted leaf protein, putative OS=Ricinus communis (Castor bean) PE=4 SV=1	gi|255566137|ref|XP_002524056.1| Spotted leaf protein, putative [Ricinus communis]	Vitis vinifera contig VV78X060552.11, whole genome shotgun sequence
Maple_Unigene_BMK.33541	0.000526875	-3.31121	down	--	--	Molecular Function: electron carrier activity (GO:0009055);; Biological Process: response to water deprivation (GO:0009414);; Biological Process: response to red or far red light (GO:0009639);; Biological Process: response to chitin (GO:0010200);; Molecular Function: (+)-abscisic acid 8'-hydroxylase activity (GO:0010295);; Molecular Function: oxygen binding (GO:0019825);; Molecular Function: heme…	K09843|3e-35|pop:POPTR_783291|(+)-abscisic acid 8'-hydroxylase [EC:1.14.13.93]	sp|Q9FH76|ABAH3_ARATH Abscisic acid 8&apos;-hydroxylase 3 OS=Arabidopsis thaliana GN=CYP707A3 PE=1 SV=1	Predicted protein GN=POPTRDRAFT_783291 OS=Populus trichocarpa (Western balsam poplar) PE=3 SV=1	gi|224129948|ref|XP_002328843.1| predicted protein [Populus trichocarpa]	Coffea arabica x Coffea canephora clone HT-SSH1-H07 mRNA sequence
Maple_Unigene_BMK.26443	1.76e-08	-3.31046	down	--	--	Cellular Component: cell wall (GO:0005618);; Biological Process: defense response (GO:0006952);; Biological Process: response to abiotic stimulus (GO:0009628);; Cellular Component: membrane (GO:0016020);; Molecular Function: oxidoreductase activity (GO:0016491);; Biological Process: growth (GO:0040007);; Biological Process: response to chemical stimulus (GO:0042221);; Molecular Function: metal io…	--	sp|Q9LEH3|PER15_IPOBA Peroxidase 15 OS=Ipomoea batatas GN=pod PE=1 SV=1	Peroxidase 2 OS=Litchi chinensis (Lychee) PE=2 SV=1	gi|205326621|gb|ACI03400.1| peroxidase 2 [Litchi chinensis]	Litchi chinensis peroxidase 2 mRNA, complete cds
Maple_Unigene_BMK.27058	0	-3.29709	down	--	--	Biological Process: cell morphogenesis (GO:0000902);; Cellular Component: nucleus (GO:0005634);; Biological Process: calcium ion transport (GO:0006816);; Biological Process: Golgi organization (GO:0007030);; Biological Process: megasporogenesis (GO:0009554);; Biological Process: microsporogenesis (GO:0009556);; Biological Process: response to salt stress (GO:0009651);; Biological Process: cell gr…	K06685|1e-140|pop:POPTR_836365|maintenance of ploidy protein MOB1 (MPS1 binder 1)	sp|Q8GYX0|MOB1_ARATH Mps one binder kinase activator-like 1 OS=Arabidopsis thaliana GN=At4g19045 PE=2 SV=1	Mob1 OS=Elaeis guineensis var. tenera (Oil palm) PE=2 SV=1	gi|192910878|gb|ACF06547.1| Mob1 [Elaeis guineensis]	Populus trichocarpa predicted protein, mRNA
Maple_Unigene_BMK.28766	0.00694459	-3.28904	down	--	--	Molecular Function: nucleotide binding (GO:0000166);; Molecular Function: protein kinase activity (GO:0004672);; Biological Process: phosphorylation (GO:0016310);;	--	sp|O64556|Y2923_ARATH Putative leucine-rich repeat receptor-like serine/threonine-protein kinase At2g19230 OS=Arabidopsis thaliana GN=At2g19230 PE=2 SV=3	Putative uncharacterized protein GN=VIT_09s0002g02720 OS=Vitis vinifera (Grape) PE=4 SV=1	gi|255549714|ref|XP_002515908.1| BRASSINOSTEROID INSENSITIVE 1-associated receptor kinase 1 precursor, putative [Ricinus communis]	--
Maple_Unigene_BMK.2461	0.00694459	-3.28904	down	--	--	Cellular Component: plasma membrane (GO:0005886);; Biological Process: aging (GO:0007568);; Biological Process: regulation of cell size (GO:0008361);; Cellular Component: plasmodesma (GO:0009506);; Biological Process: determination of bilateral symmetry (GO:0009855);; Biological Process: auxin polar transport (GO:0009926);; Biological Process: polarity specification of adaxial/abaxial axis (GO:00…	--	--	Predicted protein GN=POPTRDRAFT_836335 OS=Populus trichocarpa (Western balsam poplar) PE=4 SV=1	gi|224138936|ref|XP_002326727.1| predicted protein [Populus trichocarpa]	Ricinus communis conserved hypothetical protein, mRNA
Maple_Unigene_BMK.33309	0.000856609	-3.25478	down	--	--	Molecular Function: protein kinase activity (GO:0004672);; Biological Process: transport (GO:0006810);; Biological Process: signal transduction (GO:0007165);; Biological Process: detection of biotic stimulus (GO:0009595);; Biological Process: regulation of defense response (GO:0031347);; Biological Process: defense response to bacterium (GO:0042742);; Biological Process: cellular metabolic proces…	--	sp|O64483|SIRK_ARATH Senescence-induced receptor-like serine/threonine-protein kinase OS=Arabidopsis thaliana GN=SIRK PE=2 SV=1	Putative uncharacterized protein GN=VIT_09s0002g03030 OS=Vitis vinifera (Grape) PE=3 SV=1	gi|225442394|ref|XP_002276980.1| PREDICTED: hypothetical protein [Vitis vinifera]	Medicago truncatula chromosome 8 clone mth2-71m12 map 6.200cM, complete sequence
Maple_Unigene_BMK.34290	8.33e-09	-3.2419	down	[S]	Function unknown	Molecular Function: catalytic activity (GO:0003824);;	--	sp|C0LGS2|Y4361_ARATH Probable LRR receptor-like serine/threonine-protein kinase At4g36180 OS=Arabidopsis thaliana GN=At4g36180 PE=1 SV=1	Serine-threonine protein kinase, plant-type, putative GN=RCOM_1371710 OS=Ricinus communis (Castor bean) PE=4 SV=1	gi|255581263|ref|XP_002531443.1| serine-threonine protein kinase, plant-type, putative [Ricinus communis]	--
Maple_Unigene_BMK.20754	0	-3.24184	down	--	--	Biological Process: cellular membrane fusion (GO:0006944);; Biological Process: microsporogenesis (GO:0009556);; Biological Process: callose deposition in cell wall (GO:0052543);;	--	sp|Q00451|PRF1_SOLLC 36.4 kDa proline-rich protein OS=Solanum lycopersicum GN=TPRP-F1 PE=2 SV=1	Repetitive proline-rich cell wall protein 2, putative GN=RCOM_0670360 OS=Ricinus communis (Castor bean) PE=4 SV=1	gi|255559090|ref|XP_002520567.1| Repetitive proline-rich cell wall protein 2 precursor, putative [Ricinus communis]	Populus trichocarpa predicted protein, mRNA
Maple_Unigene_BMK.48295	1.43e-06	-3.23632	down	--	--	Cellular Component: membrane (GO:0016020);; Molecular Function: pectate lyase activity (GO:0030570);;	K01728|3e-65|pop:POPTR_712008|pectate lyase [EC:4.2.2.2]	sp|Q944R1|PLY15_ARATH Probable pectate lyase 15 OS=Arabidopsis thaliana GN=At4g13710 PE=2 SV=1	Pectate lyase 1-27 OS=Populus tremula x Populus tremuloides PE=2 SV=1	gi|170293773|gb|ACB12931.1| pectate lyase 1-27 [Populus tremula x Populus tremuloides]	Prunus persica pectase lyase mRNA, complete cds
Maple_Unigene_BMK.25297	2.33e-14	-3.21506	down	--	--	--	--	--	Putative uncharacterized protein GN=VIT_03s0091g00130 OS=Vitis vinifera (Grape) PE=4 SV=1	gi|225429293|ref|XP_002269365.1| PREDICTED: hypothetical protein [Vitis vinifera]	Ricinus communis conserved hypothetical protein, mRNA
Maple_Unigene_BMK.20484	6.44e-07	-3.20474	down	--	--	Molecular Function: inositol hexakisphosphate binding (GO:0000822);; Biological Process: response to molecule of bacterial origin (GO:0002237);; Molecular Function: receptor activity (GO:0004872);; Cellular Component: plasma membrane (GO:0005886);; Biological Process: auxin mediated signaling pathway (GO:0009734);; Molecular Function: auxin binding (GO:0010011);; Biological Process: pollen matura…	--	sp|Q7XVM8|TIR1B_ORYSJ Transport inhibitor response 1-like protein Os04g0395600 OS=Oryza sativa subsp. japonica GN=Os04g0395600 PE=2 SV=1	F-box family protein GN=FBL5 OS=Populus trichocarpa (Western balsam poplar) PE=4 SV=1	gi|224078846|ref|XP_002305651.1| f-box family protein [Populus trichocarpa]	Populus trichocarpa f-box family protein (FBL5), mRNA
Maple_Unigene_BMK.32651	1.84e-09	-3.20216	down	--	--	--	--	sp|Q07488|BCB1_ARATH Blue copper protein OS=Arabidopsis thaliana GN=BCB PE=1 SV=2	Cucumber peeling cupredoxin, putative GN=RCOM_1075030 OS=Ricinus communis (Castor bean) PE=4 SV=1	gi|255572515|ref|XP_002527192.1| Cucumber peeling cupredoxin, putative [Ricinus communis]	Volvox carteri f. nagariensis hypothetical protein, mRNA
Maple_Unigene_BMK.47591	0.00139842	-3.19606	down	--	--	Molecular Function: transporter activity (GO:0005215);; Cellular Component: plasma membrane (GO:0005886);; Biological Process: oligopeptide transport (GO:0006857);; Cellular Component: integral to membrane (GO:0016021);;	--	sp|Q9M331|PTR45_ARATH Probable peptide/nitrate transporter At3g53960 OS=Arabidopsis thaliana GN=At3g53960 PE=2 SV=2	Putative uncharacterized protein GN=VIT_08s0007g01310 OS=Vitis vinifera (Grape) PE=4 SV=1	gi|225440516|ref|XP_002272737.1| PREDICTED: hypothetical protein [Vitis vinifera]	Populus trichocarpa predicted protein, mRNA
Maple_Unigene_BMK.35783	6.43e-11	-3.19215	down	--	--	Cellular Component: Golgi apparatus (GO:0005794);; Molecular Function: methyltransferase activity (GO:0008168);; Biological Process: trichoblast differentiation (GO:0010054);; Biological Process: methylation (GO:0032259);;	--	sp|Q9ZPH9|PMTF_ARATH Probable methyltransferase PMT15 OS=Arabidopsis thaliana GN=At4g00750 PE=1 SV=1	Putative uncharacterized protein GN=VIT_16s0100g00570 OS=Vitis vinifera (Grape) PE=4 SV=1	gi|297741098|emb|CBI31829.3| unnamed protein product [Vitis vinifera]	Populus trichocarpa predicted protein, mRNA
Maple_Unigene_BMK.9648	2.28e-09	-3.18899	down	--	--	Biological Process: defense response (GO:0006952);; Biological Process: response to karrikin (GO:0080167);;	--	--	Putative uncharacterized protein GN=MTR_2g007950 OS=Medicago truncatula (Barrel medic) PE=4 SV=1	gi|255627095|gb|ACU13892.1| unknown [Glycine max]	--
Maple_Unigene_BMK.21602	1.19e-07	-3.17848	down	[R]	General function prediction only	Molecular Function: carboxylesterase activity (GO:0004091);; Molecular Function: retinyl-palmitate esterase activity (GO:0050253);; Molecular Function: methyl indole-3-acetate esterase activity (GO:0080030);; Molecular Function: methyl salicylate esterase activity (GO:0080031);; Molecular Function: methyl jasmonate esterase activity (GO:0080032);;	K06130|1e-163|pop:POPTR_640642|lysophospholipase II [EC:3.1.1.5]	sp|Q9QYL8|LYPA2_RAT Acyl-protein thioesterase 2 OS=Rattus norvegicus GN=Lypla2 PE=1 SV=1	JHL25H03.13 protein GN=JHL25H03.13 OS=Jatropha curcas PE=4 SV=1	gi|317106756|dbj|BAJ53250.1| JHL25H03.13 [Jatropha curcas]	PREDICTED: Vitis vinifera hypothetical protein LOC100246445 (LOC100246445), mRNA
Maple_Unigene_BMK.36060	5.04e-14	-3.1782	down	[S]	Function unknown	--	--	sp|Q9C9H7|RLP12_ARATH Receptor-like protein 12 OS=Arabidopsis thaliana GN=RLP12 PE=2 SV=1	Predicted protein GN=POPTRDRAFT_555046 OS=Populus trichocarpa (Western balsam poplar) PE=4 SV=1	gi|224072885|ref|XP_002303927.1| predicted protein [Populus trichocarpa]	Ricinus communis serine/threonine-protein kinase bri1, putative, mRNA
Maple_Unigene_BMK.3398	2.83e-09	-3.17571	down	[J]	Translation, ribosomal structure and biogenesis	Biological Process: respiratory burst involved in defense response (GO:0002679);; Cellular Component: intracellular (GO:0005622);; Molecular Function: N-acetyltransferase activity (GO:0008080);; Biological Process: ethylene biosynthetic process (GO:0009693);; Biological Process: abscisic acid mediated signaling pathway (GO:0009738);; Biological Process: ethylene mediated signaling pathway (GO:000…	--	sp|P05332|YP20_BACLI Uncharacterized N-acetyltransferase p20 OS=Bacillus licheniformis GN=p20 PE=4 SV=1	Putative uncharacterized protein GN=VIT_05s0020g03690 OS=Vitis vinifera (Grape) PE=4 SV=1	gi|225432712|ref|XP_002282836.1| PREDICTED: hypothetical protein [Vitis vinifera]	Ricinus communis N-acetyltransferase, putative, mRNA
Maple_Unigene_BMK.25528	1.64e-13	-3.16765	down	--	--	Biological Process: MAPK cascade (GO:0000165);; Biological Process: regulation of response to biotic stimulus (GO:0002831);; Molecular Function: iron ion binding (GO:0005506);; Cellular Component: intracellular (GO:0005622);; Biological Process: glycolysis (GO:0006096);; Biological Process: protein targeting to membrane (GO:0006612);; Biological Process: water transport (GO:0006833);; Biological …	--	sp|P17407|21KD_DAUCA 21 kDa protein OS=Daucus carota PE=2 SV=1	21 kDa protein, putative GN=RCOM_1500010 OS=Ricinus communis (Castor bean) PE=4 SV=1	gi|255539735|ref|XP_002510932.1| 21 kDa protein precursor, putative [Ricinus communis]	TSA: Jatropha curcas Contig10493, mRNA sequence
Maple_Unigene_BMK.15562	2.87e-08	-3.16044	down	[M]	Cell wall/membrane/envelope biogenesis	Cellular Component: Golgi apparatus (GO:0005794);; Molecular Function: cellulose synthase (UDP-forming) activity (GO:0016760);; Molecular Function: mannan synthase activity (GO:0051753);;	K13680|0.0|vvi:100251616|beta-mannan synthase [EC:2.4.1.32]	sp|Q9FNI7|CSLA2_ARATH Glucomannan 4-beta-mannosyltransferase 2 OS=Arabidopsis thaliana GN=CSLA2 PE=2 SV=1	Putative uncharacterized protein GN=VIT_06s0061g01230 OS=Vitis vinifera (Grape) PE=4 SV=1	gi|225436353|ref|XP_002269677.1| PREDICTED: hypothetical protein [Vitis vinifera]	Ricinus communis transferase, transferring glycosyl groups, putative, mRNA
Maple_Unigene_BMK.20973	3.95e-06	-3.15397	down	[R]	General function prediction only	Molecular Function: iron ion binding (GO:0005506);; Biological Process: response to wounding (GO:0009611);; Biological Process: response to fungus (GO:0009620);; Biological Process: jasmonic acid biosynthetic process (GO:0009695);; Biological Process: jasmonic acid mediated signaling pathway (GO:0009867);; Molecular Function: oxidoreductase activity, acting on single donors with incorporation of …	--	sp|D4N502|DIOX3_PAPSO Codeine O-demethylase OS=Papaver somniferum GN=CODM PE=1 SV=1	Predicted protein GN=POPTRDRAFT_765579 OS=Populus trichocarpa (Western balsam poplar) PE=3 SV=1	gi|224101153|ref|XP_002312162.1| predicted protein [Populus trichocarpa]	Populus trichocarpa predicted protein, mRNA
Maple_Unigene_BMK.18920	6.4e-05	-3.14799	down	--	--	Biological Process: response to molecule of bacterial origin (GO:0002237);; Molecular Function: protein serine/threonine kinase activity (GO:0004674);; Molecular Function: receptor activity (GO:0004872);; Molecular Function: ATP binding (GO:0005524);; Cellular Component: plasma membrane (GO:0005886);; Biological Process: acetyl-CoA metabolic process (GO:0006084);; Biological Process: protein phos…	--	sp|C0LGR3|Y4265_ARATH Probable LRR receptor-like serine/threonine-protein kinase At4g26540 OS=Arabidopsis thaliana GN=At4g26540 PE=1 SV=1	Receptor protein kinase, putative GN=RCOM_0104460 OS=Ricinus communis (Castor bean) PE=3 SV=1	gi|255582798|ref|XP_002532173.1| receptor protein kinase, putative [Ricinus communis]	Populus trichocarpa predicted protein, mRNA
Maple_Unigene_BMK.28268	6.43e-13	-3.13978	down	--	--	Biological Process: indoleacetic acid biosynthetic process (GO:0009684);; Biological Process: response to ethylene stimulus (GO:0009723);; Biological Process: positive gravitropism (GO:0009958);; Biological Process: maintenance of root meristem identity (GO:0010078);; Biological Process: phloem or xylem histogenesis (GO:0010087);; Biological Process: cotyledon vascular tissue pattern formation (G…	--	sp|Q9S7N2|TAA1_ARATH Tryptophan aminotransferase 1 OS=Arabidopsis thaliana GN=TAA1 PE=1 SV=1	Alliin lyase, putative GN=RCOM_1509450 OS=Ricinus communis (Castor bean) PE=4 SV=1	gi|255540565|ref|XP_002511347.1| Alliin lyase precursor, putative [Ricinus communis]	PREDICTED: Vitis vinifera hypothetical protein LOC100262049 (LOC100262049), mRNA
Maple_Unigene_BMK.24672	5.57e-06	-3.12544	down	--	--	--	K13456|9e-54|pop:POPTR_709976|RPM1-interacting protein 4	sp|Q8GYN5|RIN4_ARATH RPM1-interacting protein 4 OS=Arabidopsis thaliana GN=RIN4 PE=1 SV=1	Predicted protein GN=POPTRDRAFT_709976 OS=Populus trichocarpa (Western balsam poplar) PE=4 SV=1	gi|224065399|ref|XP_002301798.1| predicted protein [Populus trichocarpa]	Ricinus communis hypothetical protein, mRNA
Maple_Unigene_BMK.37631	7.9e-13	-3.12218	down	--	--	Cellular Component: exocyst (GO:0000145);; Cellular Component: nucleus (GO:0005634);; Cellular Component: cytosol (GO:0005829);; Biological Process: vesicle docking involved in exocytosis (GO:0006904);;	K07195|1e-112|pop:POPTR_561517|exocyst complex component 7	sp|O54922|EXOC7_RAT Exocyst complex component 7 OS=Rattus norvegicus GN=Exoc7 PE=2 SV=1	Predicted protein GN=POPTRDRAFT_561517 OS=Populus trichocarpa (Western balsam poplar) PE=4 SV=1	gi|224088585|ref|XP_002308485.1| predicted protein [Populus trichocarpa]	PREDICTED: Vitis vinifera hypothetical protein LOC100267121 (LOC100267121), mRNA
Maple_Unigene_BMK.24998	2.13e-05	-3.11834	down	--	--	Molecular Function: sequence-specific DNA binding transcription factor activity (GO:0003700);; Biological Process: regulation of transcription, DNA-dependent (GO:0006355);; Molecular Function: sequence-specific DNA binding (GO:0043565);;	--	sp|Q9C519|WRKY6_ARATH WRKY transcription factor 6 OS=Arabidopsis thaliana GN=WRKY6 PE=1 SV=1	WRKY transcription factor, putative GN=RCOM_1225970 OS=Ricinus communis (Castor bean) PE=4 SV=1	gi|255567719|ref|XP_002524838.1| WRKY transcription factor, putative [Ricinus communis]	Ricinus communis WRKY transcription factor, putative, mRNA
Maple_Unigene_BMK.1455	9.6e-05	-3.10854	down	--	--	--	--	--	Predicted protein GN=POPTRDRAFT_651446 OS=Populus trichocarpa (Western balsam poplar) PE=4 SV=1	gi|224084958|ref|XP_002307455.1| predicted protein [Populus trichocarpa]	Populus trichocarpa clone POP027-H05, complete sequence
Maple_Unigene_BMK.22791	2.31e-06	-3.10532	down	[S]	Function unknown	Cellular Component: cell wall (GO:0005618);; Biological Process: defense response (GO:0006952);; Biological Process: signal transduction (GO:0007165);; Cellular Component: plasmodesma (GO:0009506);; Cellular Component: chloroplast (GO:0009507);; Cellular Component: membrane (GO:0016020);; Molecular Function: kinase activity (GO:0016301);; Biological Process: phosphorylation (GO:0016310);; Molecul…	--	sp|Q00874|DR100_ARATH DNA-damage-repair/toleration protein DRT100 OS=Arabidopsis thaliana GN=DRT100 PE=2 SV=2	Leucine rich repeat protein OS=Glycine max (Soybean) PE=2 SV=1	gi|223452540|gb|ACM89597.1| leucine rich repeat protein [Glycine max]	Glycine max clone cw165 leucine rich repeat protein mRNA, complete cds
Maple_Unigene_BMK.12305	1.67e-08	-3.10291	down	--	--	Cellular Component: exocyst (GO:0000145);; Cellular Component: nucleus (GO:0005634);; Cellular Component: cytosol (GO:0005829);; Biological Process: iron ion transport (GO:0006826);; Biological Process: amino acid transport (GO:0006865);; Biological Process: vesicle docking involved in exocytosis (GO:0006904);; Biological Process: cellular response to iron ion starvation (GO:0010106);; Biological…	--	--	Putative uncharacterized protein (Fragment) GN=RCOM_2073750 OS=Ricinus communis (Castor bean) PE=4 SV=1	gi|255606674|ref|XP_002538611.1| conserved hypothetical protein [Ricinus communis]	Solanum lycopersicum chromosome 9 clone C09HBa0113I06, complete sequence
Maple_Unigene_BMK.4598	1.14e-10	-3.09861	down	[O]	Posttranslational modification, protein turnover, chaperones	Molecular Function: arsenate reductase (glutaredoxin) activity (GO:0008794);; Molecular Function: electron carrier activity (GO:0009055);; Molecular Function: protein disulfide oxidoreductase activity (GO:0015035);; Biological Process: methylglyoxal catabolic process to D-lactate (GO:0019243);; Biological Process: cell redox homeostasis (GO:0045454);; Biological Process: anther development (GO:00…	--	sp|Q8L8Z8|GRXS2_ARATH Monothiol glutaredoxin-S2 OS=Arabidopsis thaliana GN=GRXS2 PE=2 SV=1	Glutaredoxin GN=PtrGrx14 OS=Populus trichocarpa (Western balsam poplar) PE=4 SV=1	gi|224110588|ref|XP_002315567.1| glutaredoxin [Populus trichocarpa]	Lotus japonicus genomic DNA, chromosome 1, clone: LjT09O08, TM0231b, complete sequence
Maple_Unigene_BMK.23244	1.02e-13	-3.09821	down	[G]	Carbohydrate transport and metabolism	Molecular Function: glucokinase activity (GO:0004340);; Molecular Function: protein binding (GO:0005515);; Molecular Function: ATP binding (GO:0005524);; Cellular Component: mitochondrion (GO:0005739);; Biological Process: glycolysis (GO:0006096);; Molecular Function: fructokinase activity (GO:0008865);; Biological Process: response to cold (GO:0009409);; Cellular Component: plastid (GO:0009536);…	K00844|0.0|pop:POPTR_797614|hexokinase [EC:2.7.1.1]	sp|Q9LPS1|HXK3_ARATH Hexokinase-3 OS=Arabidopsis thaliana GN=At1g50460 PE=1 SV=1	Predicted protein GN=POPTRDRAFT_797614 OS=Populus trichocarpa (Western balsam poplar) PE=3 SV=1	gi|224054514|ref|XP_002298298.1| predicted protein [Populus trichocarpa]	Populus trichocarpa predicted protein, mRNA
Maple_Unigene_BMK.20229	7.88e-06	-3.09634	down	--	--	Molecular Function: transferase activity, transferring glycosyl groups (GO:0016757);;	--	sp|Q9FI99|CNGT1_ARATH Cytokinin-N-glucosyltransferase 1 OS=Arabidopsis thaliana GN=UGT76C1 PE=1 SV=1	Putative uncharacterized protein GN=VIT_14s0068g00460 OS=Vitis vinifera (Grape) PE=4 SV=1	gi|225451707|ref|XP_002279299.1| PREDICTED: hypothetical protein [Vitis vinifera]	PREDICTED: Vitis vinifera hypothetical protein LOC100242993 (LOC100242993), mRNA
Maple_Unigene_BMK.45067	7.88e-06	-3.09634	down	--	--	--	--	sp|O94317|YH5D_SCHPO Uncharacterized serine-rich protein C215.13 OS=Schizosaccharomyces pombe GN=SPBC215.13 PE=1 SV=1	Putative uncharacterized protein GN=VITISV_026166 OS=Vitis vinifera (Grape) PE=4 SV=1	gi|147783375|emb|CAN59884.1| hypothetical protein VITISV_026166 [Vitis vinifera]	--
Maple_Unigene_BMK.25669	3.23e-14	-3.0955	down	--	--	Cellular Component: mitochondrion (GO:0005739);; Cellular Component: vacuolar membrane (GO:0005774);; Cellular Component: plasma membrane (GO:0005886);; Biological Process: response to nitrate (GO:0010167);; Biological Process: nitrate transport (GO:0015706);; Biological Process: cysteine biosynthetic process (GO:0019344);;	--	sp|Q6CGU8|MCH1_YARLI Probable transporter MCH1 OS=Yarrowia lipolytica GN=MCH1 PE=3 SV=1	Putative uncharacterized protein GN=RCOM_1676810 OS=Ricinus communis (Castor bean) PE=4 SV=1	gi|255536871|ref|XP_002509502.1| conserved hypothetical protein [Ricinus communis]	Ricinus communis conserved hypothetical protein, mRNA
Maple_Unigene_BMK.43447	0.000529431	-3.09414	down	--	--	Molecular Function: polyneuridine-aldehyde esterase activity (GO:0050529);;	--	sp|Q0JG99|PIR7B_ORYSJ Esterase PIR7B OS=Oryza sativa subsp. japonica GN=PIR7B PE=2 SV=2	Polyneuridine-aldehyde esterase, putative GN=RCOM_0603110 OS=Ricinus communis (Castor bean) PE=4 SV=1	gi|255562693|ref|XP_002522352.1| Polyneuridine-aldehyde esterase precursor, putative [Ricinus communis]	Populus trichocarpa predicted protein, mRNA
Maple_Unigene_BMK.14266	6.11e-15	-3.09058	down	--	--	Biological Process: very long-chain fatty acid metabolic process (GO:0000038);; Cellular Component: endoplasmic reticulum (GO:0005783);; Biological Process: fatty acid biosynthetic process (GO:0006633);; Biological Process: response to cold (GO:0009409);; Biological Process: response to light stimulus (GO:0009416);; Biological Process: epidermal cell differentiation (GO:0009913);; Cellular Compon…	--	sp|Q570B4|KCS10_ARATH 3-ketoacyl-CoA synthase 10 OS=Arabidopsis thaliana GN=FDH PE=1 SV=2	3-ketoacyl-CoA synthase GN=FDH OS=Gossypium hirsutum (Upland cotton) PE=2 SV=1	gi|18447765|gb|AAL67993.1| fiddlehead-like protein [Gossypium hirsutum]	Populus trichocarpa beta-ketoacyl-coa synthase family protein, mRNA
Maple_Unigene_BMK.26355	4.31e-11	-3.0864	down	--	--	--	--	--	Putative uncharacterized protein GN=VITISV_027858 OS=Vitis vinifera (Grape) PE=4 SV=1	gi|147822078|emb|CAN77048.1| hypothetical protein VITISV_027858 [Vitis vinifera]	--
Maple_Unigene_BMK.14837	3.1e-05	-3.08445	down	--	--	Molecular Function: hydrolase activity (GO:0016787);;	--	sp|Q9LRR5|DRL21_ARATH Putative disease resistance protein At3g14460 OS=Arabidopsis thaliana GN=At3g14460 PE=2 SV=1	Leucine-rich repeat containing protein, putative GN=RCOM_1516110 OS=Ricinus communis (Castor bean) PE=4 SV=1	gi|255565992|ref|XP_002523984.1| leucine-rich repeat containing protein, putative [Ricinus communis]	PREDICTED: Vitis vinifera hypothetical protein LOC100245433 (LOC100245433), mRNA
Maple_Unigene_BMK.23102	4.91e-07	-3.07622	down	--	--	Biological Process: gene silencing (GO:0016458);; Biological Process: regulation of gene expression, epigenetic (GO:0040029);;	--	--	Putative uncharacterized protein GN=VIT_02s0025g01190 OS=Vitis vinifera (Grape) PE=4 SV=1	gi|225426014|ref|XP_002271107.1| PREDICTED: hypothetical protein [Vitis vinifera]	Vitis vinifera contig VV78X023669.8, whole genome shotgun sequence
Maple_Unigene_BMK.20320	0.00376958	-3.07091	down	[E]	Amino acid transport and metabolism	Biological Process: amino acid transmembrane transport (GO:0003333);; Molecular Function: amino acid transmembrane transporter activity (GO:0015171);; Cellular Component: integral to membrane (GO:0016021);;	--	sp|Q9US40|YFZ1_SCHPO Uncharacterized amino-acid permease C1039.01 OS=Schizosaccharomyces pombe GN=SPAC1039.01 PE=2 SV=1	Amino acid transporter GN=POPTRDRAFT_562518 OS=Populus trichocarpa (Western balsam poplar) PE=4 SV=1	gi|224093575|ref|XP_002309938.1| amino acid transporter [Populus trichocarpa]	Populus trichocarpa amino acid transporter, mRNA
Maple_Unigene_BMK.43992	1.12e-05	-3.06663	down	--	--	--	--	--	--	--	Soybean clone JCVI-FLGm-6D7 unknown mRNA
Maple_Unigene_BMK.2598	6.55e-07	-3.05487	down	--	--	Biological Process: signal transduction (GO:0007165);; Molecular Function: phosphatidylinositol binding (GO:0035091);;	--	--	Predicted protein GN=POPTRDRAFT_854211 OS=Populus trichocarpa (Western balsam poplar) PE=4 SV=1	gi|224071105|ref|XP_002303358.1| predicted protein [Populus trichocarpa]	Ricinus communis conserved hypothetical protein, mRNA
Maple_Unigene_BMK.3726	6.55e-07	-3.05487	down	--	--	Biological Process: cell wall biogenesis (GO:0042546);;	--	--	Predicted protein GN=POPTRDRAFT_595021 OS=Populus trichocarpa (Western balsam poplar) PE=4 SV=1	gi|224132456|ref|XP_002328279.1| predicted protein [Populus trichocarpa]	TSA: Jatropha curcas Contig4128, mRNA sequence
Maple_Unigene_BMK.9692	4.42e-06	-3.05292	down	--	--	Cellular Component: nucleus (GO:0005634);; Biological Process: protein targeting to membrane (GO:0006612);; Biological Process: response to ethylene stimulus (GO:0009723);; Biological Process: abscisic acid mediated signaling pathway (GO:0009738);; Biological Process: salicylic acid mediated signaling pathway (GO:0009863);; Biological Process: jasmonic acid mediated signaling pathway (GO:0009867)…	--	--	Putative uncharacterized protein GN=VIT_01s0150g00410 OS=Vitis vinifera (Grape) PE=4 SV=1	gi|225425322|ref|XP_002273940.1| PREDICTED: hypothetical protein [Vitis vinifera]	Populus trichocarpa predicted protein, mRNA
Maple_Unigene_BMK.21385	4.52e-05	-3.04974	down	--	--	--	--	sp|O80327|TLP1_PYRPY Thaumatin-like protein 1 OS=Pyrus pyrifolia GN=TL1 PE=1 SV=1	Thaumatin-like protein (Precursor) OS=Malus domestica (Apple) PE=4 SV=1	gi|25091401|sp|O80327.1|TLP1_PYRPY RecName: Full=Thaumatin-like protein 1; Flags: Precursor	Malus x domestica thaumatine-like protein (PR-5a) mRNA, partial cds
Maple_Unigene_BMK.31440	5.77e-15	-3.04176	down	[R]	General function prediction only	Cellular Component: cytoplasm (GO:0005737);; Biological Process: plant-type hypersensitive response (GO:0009626);; Cellular Component: membrane (GO:0016020);; Molecular Function: lipase activity (GO:0016298);; Biological Process: oxylipin biosynthetic process (GO:0031408);; Biological Process: response to cadmium ion (GO:0046686);; Biological Process: defense response to virus (GO:0051607);;	--	sp|Q42502|PT2K3_SOLTU Patatin-2-Kuras 3 OS=Solanum tuberosum GN=pat2-k3 PE=1 SV=1	Patatin-like protein GN=Pat1 OS=Gossypium hirsutum (Upland cotton) PE=2 SV=1	gi|62766606|gb|AAX99411.1| patatin-like protein [Gossypium hirsutum]	TSA: Jatropha curcas Contig8640, mRNA sequence
Maple_Unigene_BMK.32838	4.43e-14	-3.03201	down	[J]	Translation, ribosomal structure and biogenesis	Cellular Component: plastid small ribosomal subunit (GO:0000312);; Molecular Function: structural constituent of ribosome (GO:0003735);; Molecular Function: protein binding (GO:0005515);; Cellular Component: mitochondrial small ribosomal subunit (GO:0005763);; Cellular Component: plasma membrane (GO:0005886);; Biological Process: generation of precursor metabolites and energy (GO:0006091);; Biolo…	K02982|1e-105|ath:ArthCp061|small subunit ribosomal protein S3	sp|A4QJW9|RR3_OLIPU 30S ribosomal protein S3, chloroplastic OS=Olimarabidopsis pumila GN=rps3 PE=3 SV=1	50S ribosomal protein L2-B GN=MTR_4g034730 OS=Medicago truncatula (Barrel medic) PE=3 SV=1	gi|262400803|gb|ACY66292.1| ribosomal protein S3 [Brassica napus]	Limnanthes floccosa subsp. floccosa chloroplast sequence
Maple_Unigene_BMK.23286	6.02e-10	-3.02257	down	--	--	--	--	sp|P08770|TRA1_MAIZE Putative AC transposase OS=Zea mays PE=2 SV=2	HAT family dimerisation domain containing protein GN=LOC_Os11g42780 OS=Oryza sativa subsp. japonica (Rice) PE=4 SV=1	gi|77552320|gb|ABA95117.1| hAT family dimerisation domain containing protein [Oryza sativa Japonica Group]	--
Maple_Unigene_BMK.25340	6.6e-05	-3.01418	down	[Q]	Secondary metabolites biosynthesis, transport and catabolism	Molecular Function: monooxygenase activity (GO:0004497);; Molecular Function: iron ion binding (GO:0005506);; Molecular Function: oxidoreductase activity, acting on paired donors, with incorporation or reduction of molecular oxygen (GO:0016705);;	--	sp|O49859|C82A4_SOYBN Cytochrome P450 82A4 OS=Glycine max GN=CYP82A4 PE=2 SV=1	Putative uncharacterized protein GN=VIT_18s0001g11500 OS=Vitis vinifera (Grape) PE=3 SV=1	gi|225458446|ref|XP_002282035.1| PREDICTED: hypothetical protein [Vitis vinifera]	Populus trichocarpa cytochrome P450 (CYP82D2), mRNA
Maple_Unigene_BMK.23961	9.76e-11	-3.01351	down	[J]	Translation, ribosomal structure and biogenesis	Biological Process: respiratory burst involved in defense response (GO:0002679);; Cellular Component: intracellular (GO:0005622);; Molecular Function: N-acetyltransferase activity (GO:0008080);; Biological Process: ethylene biosynthetic process (GO:0009693);; Biological Process: abscisic acid mediated signaling pathway (GO:0009738);; Biological Process: ethylene mediated signaling pathway (GO:000…	--	sp|P05332|YP20_BACLI Uncharacterized N-acetyltransferase p20 OS=Bacillus licheniformis GN=p20 PE=4 SV=1	Predicted protein GN=POPTRDRAFT_726530 OS=Populus trichocarpa (Western balsam poplar) PE=4 SV=1	gi|224111148|ref|XP_002315763.1| predicted protein [Populus trichocarpa]	Ricinus communis N-acetyltransferase, putative, mRNA
Maple_Unigene_BMK.19404	0.00621937	-3.00402	down	[Q]	Secondary metabolites biosynthesis, transport and catabolism	Molecular Function: electron carrier activity (GO:0009055);; Molecular Function: oxygen binding (GO:0019825);; Molecular Function: heme binding (GO:0020037);; Molecular Function: licodione synthase activity (GO:0033771);; Biological Process: oxidation-reduction process (GO:0055114);;	--	sp|Q42798|C93A1_SOYBN Cytochrome P450 93A1 OS=Glycine max GN=CYP93A1 PE=2 SV=1	Predicted protein GN=POPTRDRAFT_811528 OS=Populus trichocarpa (Western balsam poplar) PE=3 SV=1	gi|224120228|ref|XP_002330996.1| predicted protein [Populus trichocarpa]	Populus trichocarpa predicted protein, mRNA
Maple_Unigene_BMK.32108	0.00621937	-3.00402	down	--	--	--	--	sp|P08770|TRA1_MAIZE Putative AC transposase OS=Zea mays PE=2 SV=2	Putative uncharacterized protein OS=Zea mays (Maize) PE=2 SV=1	gi|212721956|ref|NP_001132357.1| hypothetical protein LOC100193801 [Zea mays]	Morus alba 3-hydroxy-3-methylglutaryl-coenzyme A reductase (HMGR) gene, complete cds
Maple_Unigene_BMK.30767	8.62e-08	-2.99376	down	[RTKL]	--	Molecular Function: protein tyrosine kinase activity (GO:0004713);; Molecular Function: receptor activity (GO:0004872);; Molecular Function: ATP binding (GO:0005524);; Cellular Component: plasma membrane (GO:0005886);; Biological Process: protein phosphorylation (GO:0006468);; Biological Process: oligopeptide transport (GO:0006857);; Biological Process: cellular response to nitrogen starvation (G…	--	sp|Q8VZG8|Y4885_ARATH Probable LRR receptor-like serine/threonine-protein kinase At4g08850 OS=Arabidopsis thaliana GN=At4g08850 PE=1 SV=3	Putative uncharacterized protein GN=VITISV_008862 OS=Vitis vinifera (Grape) PE=4 SV=1	gi|147767326|emb|CAN68996.1| hypothetical protein VITISV_008862 [Vitis vinifera]	Vitis vinifera, whole genome shotgun sequence, contig VV78X111461.16, clone ENTAV 115
Maple_Unigene_BMK.18625	0.00130557	-2.99131	down	--	--	--	--	sp|P13240|DR206_PEA Disease resistance response protein 206 OS=Pisum sativum GN=PI206 PE=2 SV=2	Disease resistance response protein, putative GN=RCOM_1467510 OS=Ricinus communis (Castor bean) PE=4 SV=1	gi|255547099|ref|XP_002514607.1| Disease resistance response protein, putative [Ricinus communis]	Ricinus communis Disease resistance response protein, putative, mRNA
Maple_Unigene_BMK.27117	1.21e-08	-2.98383	down	[C]	Energy production and conversion	Biological Process: transport (GO:0006810);; Cellular Component: chloroplast thylakoid membrane (GO:0009535);; Molecular Function: oxidoreductase activity, acting on NADH or NADPH, quinone or similar compound as acceptor (GO:0016655);; Biological Process: photosynthesis, light reaction (GO:0019684);; Molecular Function: quinone binding (GO:0048038);; Molecular Function: NAD binding (GO:0051287);;…	K05579|0.0|vvi:4025072|NADH dehydrogenase I subunit 7 [EC:1.6.5.3]	sp|B1A990|NDHH_CARPA NAD(P)H-quinone oxidoreductase subunit H, chloroplastic OS=Carica papaya GN=ndhH PE=3 SV=1	NADH dehydrogenase subunit 7 GN=ndhH OS=Gossypium raimondii (New World cotton) PE=4 SV=1	gi|167391854|ref|YP_001671738.1| NADH dehydrogenase subunit 7 [Carica papaya]	Citrus sinensis chloroplast, complete genome
Maple_Unigene_BMK.32510	6.3e-08	-2.97555	down	[S]	Function unknown	Biological Process: systemic acquired resistance (GO:0009627);; Biological Process: regulation of defense response (GO:0031347);;	--	sp|O13737|YDR2_SCHPO Uncharacterized endoplasmic reticulum membrane protein C16E8.02 OS=Schizosaccharomyces pombe GN=SPAC16E8.02 PE=2 SV=2	Putative uncharacterized protein OS=Populus trichocarpa (Western balsam poplar) PE=2 SV=1	gi|118485204|gb|ABK94463.1| unknown [Populus trichocarpa]	TSA: Cajanus cajan cultivar UPAS 120 contig19219.UPAS mRNA sequence
Maple_Unigene_BMK.26319	4.25e-14	-2.96805	down	--	--	Biological Process: microtubule nucleation (GO:0007020);; Cellular Component: plant-type cell wall (GO:0009505);; Cellular Component: plasmodesma (GO:0009506);; Biological Process: response to karrikin (GO:0080167);;	--	sp|P45481|CBP_MOUSE CREB-binding protein OS=Mus musculus GN=Crebbp PE=1 SV=2	Putative uncharacterized protein GN=RCOM_0600270 OS=Ricinus communis (Castor bean) PE=4 SV=1	gi|255572411|ref|XP_002527143.1| conserved hypothetical protein [Ricinus communis]	Fragaria vesca subsp. americana clone fosmid 01L02, complete sequence
Maple_Unigene_BMK.23287	1.62e-10	-2.96051	down	--	--	--	--	sp|P08770|TRA1_MAIZE Putative AC transposase OS=Zea mays PE=2 SV=2	Putative uncharacterized protein GN=OsJ_23821 OS=Oryza sativa subsp. japonica (Rice) PE=4 SV=1	gi|222636820|gb|EEE66952.1| hypothetical protein OsJ_23821 [Oryza sativa Japonica Group]	--
Maple_Unigene_BMK.26352	5.31e-09	-2.9566	down	--	--	--	--	--	Putative uncharacterized protein GN=VIT_00s0265g00060 OS=Vitis vinifera (Grape) PE=4 SV=1	gi|224126567|ref|XP_002329586.1| predicted protein [Populus trichocarpa]	--
Maple_Unigene_BMK.18919	3.26e-10	-2.94607	down	[RTKL]	--	Biological Process: response to molecule of bacterial origin (GO:0002237);; Molecular Function: protein serine/threonine kinase activity (GO:0004674);; Molecular Function: receptor activity (GO:0004872);; Molecular Function: ATP binding (GO:0005524);; Cellular Component: plasma membrane (GO:0005886);; Biological Process: protein phosphorylation (GO:0006468);; Biological Process: signal transducti…	--	sp|C0LGR3|Y4265_ARATH Probable LRR receptor-like serine/threonine-protein kinase At4g26540 OS=Arabidopsis thaliana GN=At4g26540 PE=1 SV=1	Predicted protein GN=POPTRDRAFT_798285 OS=Populus trichocarpa (Western balsam poplar) PE=3 SV=1	gi|224056849|ref|XP_002299054.1| predicted protein [Populus trichocarpa]	Ricinus communis receptor protein kinase, putative, mRNA
Maple_Unigene_BMK.21319	0.000500013	-2.93897	down	--	--	Biological Process: xylem development (GO:0010089);; Biological Process: cellular cell wall macromolecule metabolic process (GO:0010382);;	--	--	Putative uncharacterized protein GN=RCOM_0888480 OS=Ricinus communis (Castor bean) PE=4 SV=1	gi|255560321|ref|XP_002521177.1| conserved hypothetical protein [Ricinus communis]	Ricinus communis conserved hypothetical protein, mRNA
Maple_Unigene_BMK.13306	0.000500013	-2.93897	down	[R]	General function prediction only	Biological Process: respiratory burst involved in defense response (GO:0002679);; Molecular Function: chitinase activity (GO:0004568);; Cellular Component: cell wall (GO:0005618);; Biological Process: chitin catabolic process (GO:0006032);; Biological Process: amino acid transport (GO:0006865);; Biological Process: response to nitrate (GO:0010167);; Biological Process: response to chitin (GO:0010…	--	sp|Q5NB11|CHI10_ORYSJ Chitinase 10 OS=Oryza sativa subsp. japonica GN=Cht10 PE=2 SV=1	Predicted protein (Fragment) GN=POPTRDRAFT_245331 OS=Populus trichocarpa (Western balsam poplar) PE=4 SV=1	gi|224130822|ref|XP_002320933.1| predicted protein [Populus trichocarpa]	Populus trichocarpa predicted protein, mRNA
Maple_Unigene_BMK.7793	0.0020596	-2.93701	down	--	--	Biological Process: signal transduction (GO:0007165);; Molecular Function: kinase activity (GO:0016301);; Biological Process: phosphorylation (GO:0016310);; Molecular Function: 2-alkenal reductase [NAD(P)] activity (GO:0032440);; Biological Process: oxidation-reduction process (GO:0055114);;	--	sp|C0LGQ5|GSO1_ARATH LRR receptor-like serine/threonine-protein kinase GSO1 OS=Arabidopsis thaliana GN=GSO1 PE=2 SV=1	Predicted protein GN=POPTRDRAFT_798045 OS=Populus trichocarpa (Western balsam poplar) PE=4 SV=1	gi|224056184|ref|XP_002298744.1| predicted protein [Populus trichocarpa]	Populus trichocarpa predicted protein, mRNA
Maple_Unigene_BMK.36431	3.3e-12	-2.92994	down	[S]	Function unknown	--	--	sp|Q9C9H7|RLP12_ARATH Receptor-like protein 12 OS=Arabidopsis thaliana GN=RLP12 PE=2 SV=1	Serine/threonine-protein kinase bri1, putative GN=RCOM_1452420 OS=Ricinus communis (Castor bean) PE=4 SV=1	gi|255543977|ref|XP_002513051.1| serine/threonine-protein kinase bri1, putative [Ricinus communis]	--
Maple_Unigene_BMK.7358	1.76e-13	-2.92974	down	[M]	Cell wall/membrane/envelope biogenesis	Molecular Function: nucleotide binding (GO:0000166);; Molecular Function: protein binding (GO:0005515);; Cellular Component: cytosol (GO:0005829);; Biological Process: glucose catabolic process (GO:0006007);; Molecular Function: GDP-mannose 4,6-dehydratase activity (GO:0008446);; Biological Process: unidimensional cell growth (GO:0009826);; Biological Process: GDP-mannose metabolic process (GO:00…	K01711|0.0|pop:POPTR_1083784|GDPmannose 4,6-dehydratase [EC:4.2.1.47]	sp|Q9SNY3|GMD1_ARATH GDP-mannose 4,6 dehydratase 1 OS=Arabidopsis thaliana GN=GMD1 PE=2 SV=1	GDP-mannose 4,6-dehydratase GN=GMD OS=Nicotiana tabacum (Common tobacco) PE=2 SV=1	gi|305632921|dbj|BAJ16176.1| GDP-mannose 4,6-dehydratase [Nicotiana tabacum]	Brassica rapa subsp. pekinensis clone KBrS001M03, complete sequence
Maple_Unigene_BMK.34973	3.8e-06	-2.91967	down	[P]	Inorganic ion transport and metabolism	Biological Process: respiratory burst involved in defense response (GO:0002679);; Molecular Function: calcium-transporting ATPase activity (GO:0005388);; Molecular Function: calmodulin binding (GO:0005516);; Molecular Function: ATP binding (GO:0005524);; Biological Process: ATP biosynthetic process (GO:0006754);; Biological Process: cellular zinc ion homeostasis (GO:0006882);; Biological Process:…	--	sp|Q9LY77|ACA12_ARATH Calcium-transporting ATPase 12, plasma membrane-type OS=Arabidopsis thaliana GN=ACA12 PE=2 SV=1	Cation-transporting atpase plant, putative GN=RCOM_0990740 OS=Ricinus communis (Castor bean) PE=3 SV=1	gi|255559867|ref|XP_002520952.1| cation-transporting atpase plant, putative [Ricinus communis]	Ricinus communis cation-transporting atpase plant, putative, mRNA
Maple_Unigene_BMK.24166	3.8e-06	-2.91967	down	--	--	--	--	--	Predicted protein OS=Populus trichocarpa (Western balsam poplar) PE=4 SV=1	gi|224075102|ref|XP_002304558.1| predicted protein [Populus trichocarpa]	--
Maple_Unigene_BMK.21190	9.12e-08	-2.915	down	--	--	Molecular Function: copper ion binding (GO:0005507);; Cellular Component: cytosol (GO:0005829);; Molecular Function: L-ascorbate oxidase activity (GO:0008447);; Cellular Component: plant-type cell wall (GO:0009505);; Cellular Component: plasmodesma (GO:0009506);; Cellular Component: membrane (GO:0016020);; Biological Process: sterol biosynthetic process (GO:0016126);; Cellular Component: apoplast…	--	sp|Q00624|ASOL_BRANA L-ascorbate oxidase homolog OS=Brassica napus GN=Bp10 PE=2 SV=1	Putative uncharacterized protein GN=VIT_18s0001g00470 OS=Vitis vinifera (Grape) PE=4 SV=1	gi|225459808|ref|XP_002285913.1| PREDICTED: hypothetical protein [Vitis vinifera]	Prunus dulcis clone Pdbcs-E31 putative pectin esterase mRNA, partial cds
Maple_Unigene_BMK.27746	2.25e-09	-2.90881	down	[J]	Translation, ribosomal structure and biogenesis	Molecular Function: structural constituent of ribosome (GO:0003735);; Cellular Component: ribosome (GO:0005840);; Biological Process: translation (GO:0006412);; Cellular Component: chloroplast (GO:0009507);;	K02913|3e-34|ath:ArthCp043|large subunit ribosomal protein L33	sp|A6MM57|RK33_BUXMI 50S ribosomal protein L33, chloroplastic OS=Buxus microphylla GN=rpl33 PE=3 SV=1	50S ribosomal protein L33, chloroplastic GN=rpl33 OS=Nelumbo lutea (American lotus) PE=3 SV=1	gi|290487592|gb|ADD30180.1| ribosomal protein L33 [Nelumbo nucifera]	Citrus sinensis chloroplast, complete genome
Maple_Unigene_BMK.28743	2.68e-10	-2.8992	down	--	--	Molecular Function: DNA binding (GO:0003677);; Molecular Function: sequence-specific DNA binding transcription factor activity (GO:0003700);; Biological Process: regulation of transcription, DNA-dependent (GO:0006355);; Biological Process: multicellular organismal development (GO:0007275);;	--	sp|Q7GCL7|NAC74_ORYSJ NAC domain-containing protein 74 OS=Oryza sativa subsp. japonica GN=NAC74 PE=2 SV=1	Transcription factor, putative GN=RCOM_0865060 OS=Ricinus communis (Castor bean) PE=4 SV=1	gi|255557623|ref|XP_002519841.1| transcription factor, putative [Ricinus communis]	Populus trichocarpa NAC domain protein, IPR003441 (NAC010), mRNA
Maple_Unigene_BMK.26657	8.25e-11	-2.88698	down	[P]	Inorganic ion transport and metabolism	Molecular Function: secondary active sulfate transmembrane transporter activity (GO:0008271);; Biological Process: sulfate transport (GO:0008272);; Cellular Component: integral to membrane (GO:0016021);; Biological Process: transmembrane transport (GO:0055085);;	--	sp|P53393|SUT3_STYHA Low affinity sulfate transporter 3 OS=Stylosanthes hamata GN=ST3 PE=2 SV=1	Sulfate transporter, putative GN=RCOM_1033840 OS=Ricinus communis (Castor bean) PE=4 SV=1	gi|255545632|ref|XP_002513876.1| sulfate transporter, putative [Ricinus communis]	Ricinus communis sulfate transporter, putative, mRNA
Maple_Unigene_BMK.34891	3.26e-05	-2.88323	down	--	--	Molecular Function: metalloendopeptidase activity (GO:0004222);; Biological Process: proteolysis (GO:0006508);; Molecular Function: zinc ion binding (GO:0008270);; Cellular Component: extracellular matrix (GO:0031012);;	--	sp|P29136|MEP1_SOYBN Metalloendoproteinase 1 OS=Glycine max PE=1 SV=2	Metalloendoproteinase 1, putative GN=RCOM_0852690 OS=Ricinus communis (Castor bean) PE=4 SV=1	gi|255552736|ref|XP_002517411.1| Metalloendoproteinase 1 precursor, putative [Ricinus communis]	--
Maple_Unigene_BMK.45988	0.003258	-2.88058	down	--	--	Molecular Function: carboxypeptidase activity (GO:0004180);;	--	sp|Q9CAU0|SCP6_ARATH Serine carboxypeptidase-like 6 OS=Arabidopsis thaliana GN=SCPL6 PE=2 SV=1	Serine carboxypeptidase, putative GN=RCOM_1995380 OS=Ricinus communis (Castor bean) PE=4 SV=1	gi|255591057|ref|XP_002535430.1| serine carboxypeptidase, putative [Ricinus communis]	--
Maple_Unigene_BMK.11257	3.16e-13	-2.87677	down	--	--	Molecular Function: monooxygenase activity (GO:0004497);; Molecular Function: electron carrier activity (GO:0009055);; Cellular Component: chloroplast (GO:0009507);; Molecular Function: oxidoreductase activity, acting on paired donors, with incorporation or reduction of molecular oxygen (GO:0016705);; Molecular Function: heme binding (GO:0020037);; Biological Process: oxidation-reduction process …	--	sp|Q49KT9|YCF68_EUCGG Uncharacterized protein ycf68 OS=Eucalyptus globulus subsp. globulus GN=ycf68-1 PE=3 SV=1	Ycf68 GN=MTR_4g129360 OS=Medicago truncatula (Barrel medic) PE=4 SV=1	gi|55168340|gb|AAV44205.1| unknow protein [Oryza sativa Japonica Group]	Citrus sinensis chloroplast, complete genome
Maple_Unigene_BMK.35046	4.69e-07	-2.87568	down	--	--	Cellular Component: chloroplast (GO:0009507);; Cellular Component: photosystem I (GO:0009522);; Biological Process: photosynthesis (GO:0015979);; Cellular Component: integral to membrane (GO:0016021);; Molecular Function: metal ion binding (GO:0046872);;	--	sp|Q0ZJ20|PSAA_VITVI Photosystem I P700 chlorophyll a apoprotein A1 OS=Vitis vinifera GN=psaA PE=3 SV=1	Putative uncharacterized protein ORF4 GN=ORF4 OS=Cucumis melo subsp. melo PE=4 SV=1	gi|14627103|emb|CAC44035.1| PSI P700 apoprotein A1 [Daucus carota]	Acer palmatum chloroplast partial mRNA for photosystem1 subunit A (psaA gene)
Maple_Unigene_BMK.36584	4.81e-13	-2.8685	down	--	--	Molecular Function: iron ion binding (GO:0005506);; Molecular Function: protein binding (GO:0005515);; Biological Process: DNA-dependent transcription, elongation (GO:0006354);; Cellular Component: photosystem II (GO:0009523);; Cellular Component: chloroplast thylakoid membrane (GO:0009535);; Biological Process: response to herbicide (GO:0009635);; Biological Process: photosynthetic electron tran…	K02703|0.0|ath:ArthCp002|photosystem II P680 reaction center D1 protein	sp|P69556|PSBA_TOBAC Photosystem Q(B) protein OS=Nicotiana tabacum GN=psbA PE=3 SV=2	Photosystem Q(B) protein GN=psbA OS=Nicotiana glutinosa (Tobacco) PE=3 SV=1	gi|112030956|gb|ABH88068.1| photosystem II protein D1 [Phaseolus vulgaris]	Aesculus hippocastanum voucher Kew 00-69.11289-263 trnH-trnK intergenic spacer, partial sequence; chloroplast
Maple_Unigene_BMK.26421	2.64e-12	-2.86491	down	--	--	Biological Process: response to abscisic acid stimulus (GO:0009737);; Biological Process: seed germination (GO:0009845);; Molecular Function: 2-alkenal reductase [NAD(P)] activity (GO:0032440);; Biological Process: inositol trisphosphate metabolic process (GO:0032957);; Biological Process: phosphatidylinositol phosphorylation (GO:0046854);; Biological Process: inositol phosphate dephosphorylation…	--	sp|Q9FUR2|IP5P2_ARATH Type I inositol-1,4,5-trisphosphate 5-phosphatase 2 OS=Arabidopsis thaliana GN=IP5P2 PE=1 SV=2	Type I inositol polyphosphate 5-phosphatase, putative GN=RCOM_1278010 OS=Ricinus communis (Castor bean) PE=4 SV=1	gi|255573423|ref|XP_002527637.1| type I inositol polyphosphate 5-phosphatase, putative [Ricinus communis]	Populus trichocarpa predicted protein, mRNA
Maple_Unigene_BMK.25574	1.14e-09	-2.86193	down	--	--	Biological Process: respiratory burst involved in defense response (GO:0002679);; Molecular Function: chitinase activity (GO:0004568);; Cellular Component: cell wall (GO:0005618);; Biological Process: chitin catabolic process (GO:0006032);; Molecular Function: chitin binding (GO:0008061);; Biological Process: plant-type hypersensitive response (GO:0009626);; Biological Process: response to nitrat…	K01183|1e-165|pop:POPTR_1116414|chitinase [EC:3.2.1.14]	sp|P27054|CHI4_PHAVU Endochitinase PR4 OS=Phaseolus vulgaris GN=CHI4 PE=2 SV=1	Class IV chitinase OS=Pyrus pyrifolia (Chinese pear) PE=2 SV=1	gi|222139394|gb|ACM45716.1| class IV chitinase [Pyrus pyrifolia]	Pyrus pyrifolia class IV chitinase mRNA, complete cds
Maple_Unigene_BMK.18600	7.02e-09	-2.85771	down	--	--	Molecular Function: oxygen transporter activity (GO:0005344);; Biological Process: fatty acid metabolic process (GO:0006631);; Biological Process: response to cytokinin stimulus (GO:0009735);; Biological Process: oxygen transport (GO:0015671);; Biological Process: triglyceride biosynthetic process (GO:0019432);; Molecular Function: oxygen binding (GO:0019825);; Molecular Function: heme binding (G…	--	sp|Q93Y92|HBL2_GOSHI Non-symbiotic hemoglobin 2 OS=Gossypium hirsutum GN=HB2 PE=3 SV=1	Non-symbiotic hemoglobin 2 GN=AHB2 OS=Arabidopsis lyrata subsp. lyrata (Lyre-leaved rock-cress) PE=3 SV=1	gi|22001640|sp|Q93Y92.1|HBL2_GOSHI RecName: Full=Non-symbiotic hemoglobin 2; AltName: Full=GOShi GLB2; Short=Hb2	Ricinus communis non-symbiotic hemoglobin, putative, mRNA
Maple_Unigene_BMK.15082	4.03e-06	-2.85612	down	[L]	Replication, recombination and repair	Biological Process: base-excision repair (GO:0006284);; Biological Process: DNA methylation (GO:0006306);; Molecular Function: DNA-3-methyladenine glycosylase activity (GO:0008725);; Cellular Component: plastid (GO:0009536);; Biological Process: response to blue light (GO:0009637);; Biological Process: regulation of proton transport (GO:0010155);; Biological Process: protein autophosphorylation (…	K01246|1e-126|pop:POPTR_1084717|DNA-3-methyladenine glycosylase I [EC:3.2.2.20]	sp|P05100|3MG1_ECOLI DNA-3-methyladenine glycosylase 1 OS=Escherichia coli (strain K12) GN=tag PE=1 SV=1	Predicted protein GN=POPTRDRAFT_1084717 OS=Populus trichocarpa (Western balsam poplar) PE=2 SV=1	gi|224101295|ref|XP_002312220.1| predicted protein [Populus trichocarpa]	Populus trichocarpa predicted protein, mRNA
Maple_Unigene_BMK.16481	4.57e-05	-2.85291	down	--	--	--	--	--	Predicted protein GN=POPTRDRAFT_590322 OS=Populus trichocarpa (Western balsam poplar) PE=4 SV=1	gi|224146215|ref|XP_002336294.1| predicted protein [Populus trichocarpa]	Solanum phureja sieve element occlusion c (SEOc) mRNA, complete cds
Maple_Unigene_BMK.25050	2.34e-10	-2.85261	down	[C]	Energy production and conversion	Biological Process: transport (GO:0006810);; Molecular Function: NADH dehydrogenase (ubiquinone) activity (GO:0008137);; Cellular Component: chloroplast thylakoid membrane (GO:0009535);; Cellular Component: integral to membrane (GO:0016021);; Molecular Function: quinone binding (GO:0048038);; Biological Process: oxidation-reduction process (GO:0055114);;	K05578|1e-103|vvi:4025042|NADH dehydrogenase I subunit 6 [EC:1.6.5.3]	sp|Q09MC3|NU6C_CITSI NAD(P)H-quinone oxidoreductase subunit 6, chloroplastic OS=Citrus sinensis GN=ndhG PE=3 SV=1	NAD(P)H-quinone oxidoreductase subunit 6, chloroplastic GN=ndhG OS=Berberidopsis corallina PE=3 SV=1	gi|114329710|ref|YP_740530.1| NADH-plastoquinone oxidoreductase subunit 6 [Citrus sinensis]	Gonystylus bancanus chloroplast, partial genome
Maple_Unigene_BMK.26007	2.21e-08	-2.84523	down	[RTKL]	--	Molecular Function: protein serine/threonine kinase activity (GO:0004674);; Molecular Function: non-membrane spanning protein tyrosine kinase activity (GO:0004715);; Molecular Function: receptor activity (GO:0004872);; Molecular Function: ATP binding (GO:0005524);; Cellular Component: plasma membrane (GO:0005886);; Biological Process: circadian rhythm (GO:0007623);; Biological Process: cell wall …	--	sp|Q3EDL4|Y1154_ARATH Probable serine/threonine-protein kinase At1g01540 OS=Arabidopsis thaliana GN=At1g01540 PE=1 SV=2	Putative uncharacterized protein GN=VIT_07s0031g00480 OS=Vitis vinifera (Grape) PE=3 SV=1	gi|255565232|ref|XP_002523608.1| BRASSINOSTEROID INSENSITIVE 1-associated receptor kinase 1 precursor, putative [Ricinus communis]	Ricinus communis BRASSINOSTEROID INSENSITIVE 1-associated receptor kinase 1 precursor, putative, mRNA
Maple_Unigene_BMK.18895	3.39e-08	-2.84026	down	--	--	--	--	--	Predicted protein GN=POPTRDRAFT_548708 OS=Populus trichocarpa (Western balsam poplar) PE=4 SV=1	gi|224054232|ref|XP_002298157.1| predicted protein [Populus trichocarpa]	--
Maple_Unigene_BMK.14905	0.000136093	-2.83959	down	--	--	--	K13909|8e-08|pon:100457429|mucin-7	sp|Q8TAX7|MUC7_HUMAN Mucin-7 OS=Homo sapiens GN=MUC7 PE=1 SV=2	Tracheary element differentiation-related 7B GN=TED7B OS=Zinnia elegans (Zinnia) PE=2 SV=1	gi|229002017|dbj|BAH57855.1| tracheary element differentiation-related 7B [Zinnia violacea]	--
Maple_Unigene_BMK.22035	2.41e-12	-2.8186	down	--	--	Molecular Function: superoxide dismutase activity (GO:0004784);; Cellular Component: nucleus (GO:0005634);; Biological Process: response to cold (GO:0009409);; Cellular Component: plant-type cell wall (GO:0009505);; Biological Process: stomatal complex morphogenesis (GO:0010103);; Biological Process: photosynthesis, light reaction (GO:0019684);; Biological Process: cellular cation homeostasis (GO…	--	sp|Q9ZRA4|AB19A_PRUPE Auxin-binding protein ABP19a OS=Prunus persica GN=ABP19A PE=3 SV=1	Germin-like protein 6 GN=GER6 OS=Vitis vinifera (Grape) PE=2 SV=1	gi|225444754|ref|XP_002279259.1| PREDICTED: germin-like protein 6 [Vitis vinifera]	Populus trichocarpa predicted protein, mRNA
Maple_Unigene_BMK.26604	7.6e-10	-2.81196	down	--	--	Cellular Component: extracellular region (GO:0005576);; Biological Process: syncytium formation (GO:0006949);; Biological Process: plant-type cell wall organization (GO:0009664);; Cellular Component: membrane (GO:0016020);;	--	sp|O22874|EXPA8_ARATH Expansin-A8 OS=Arabidopsis thaliana GN=EXPA8 PE=2 SV=1	Putative uncharacterized protein PtrEXPA12 GN=PtrEXPA12 OS=Populus trichocarpa (Western balsam poplar) PE=3 SV=1	gi|224146217|ref|XP_002325925.1| hypothetical protein POPTRDRAFT_665631 [Populus trichocarpa]	Dimocarpus longan expansin 3 (Exp3) mRNA, complete cds
Maple_Unigene_BMK.2043	4.85e-10	-2.78984	down	--	--	--	--	--	Putative uncharacterized protein GN=VIT_16s0050g00400 OS=Vitis vinifera (Grape) PE=4 SV=1	gi|225470749|ref|XP_002267610.1| PREDICTED: hypothetical protein [Vitis vinifera]	Ricinus communis conserved hypothetical protein, mRNA
Maple_Unigene_BMK.27310	1.27e-08	-2.78805	down	--	--	Molecular Function: protein kinase activity (GO:0004672);; Biological Process: phosphorylation (GO:0016310);;	--	sp|Q39688|EP1G_DAUCA Epidermis-specific secreted glycoprotein EP1 OS=Daucus carota GN=EP1 PE=1 SV=1	S-locus-specific glycoprotein, putative GN=RCOM_0539160 OS=Ricinus communis (Castor bean) PE=4 SV=1	gi|255569831|ref|XP_002525879.1| S-locus-specific glycoprotein precursor, putative [Ricinus communis]	Populus trichocarpa predicted protein, mRNA
Maple_Unigene_BMK.28119	1.31e-12	-2.7862	down	--	--	--	--	sp|P32765|ASP_THECC 21 kDa seed protein OS=Theobroma cacao GN=ASP PE=2 SV=1	Vegetative storage protein GN=VSP1 OS=Litchi chinensis (Lychee) PE=2 SV=1	gi|109895416|gb|ABG47463.1| vegetative storage protein [Litchi chinensis]	--
Maple_Unigene_BMK.3840	4.47e-05	-2.77935	down	--	--	Molecular Function: protein kinase activity (GO:0004672);; Biological Process: ion transport (GO:0006811);; Biological Process: response to stress (GO:0006950);; Biological Process: phosphorylation (GO:0016310);; Biological Process: response to chemical stimulus (GO:0042221);; Biological Process: primary metabolic process (GO:0044238);; Biological Process: cellular macromolecule metabolic process…	--	sp|Q9M0X5|CRK25_ARATH Cysteine-rich receptor-like protein kinase 25 OS=Arabidopsis thaliana GN=CRK25 PE=2 SV=1	Predicted protein OS=Populus trichocarpa (Western balsam poplar) PE=4 SV=1	gi|224109230|ref|XP_002333290.1| predicted protein [Populus trichocarpa]	Ricinus communis serine-threonine protein kinase, plant-type, putative, mRNA
Maple_Unigene_BMK.26427	1.67e-12	-2.77684	down	--	--	Molecular Function: peroxidase activity (GO:0004601);; Biological Process: response to oxidative stress (GO:0006979);; Cellular Component: plant-type cell wall (GO:0009505);; Biological Process: glucuronoxylan metabolic process (GO:0010413);; Molecular Function: heme binding (GO:0020037);; Biological Process: xylan biosynthetic process (GO:0045492);; Biological Process: oxidation-reduction proces…	K00430|1e-178|rcu:RCOM_1599320|peroxidase [EC:1.11.1.7]	sp|Q43872|PER64_ARATH Peroxidase 64 OS=Arabidopsis thaliana GN=PER64 PE=1 SV=1	Peroxidase 64, putative GN=RCOM_1599320 OS=Ricinus communis (Castor bean) PE=3 SV=1	gi|255539044|ref|XP_002510587.1| Peroxidase 64 precursor, putative [Ricinus communis]	PREDICTED: Vitis vinifera hypothetical protein LOC100250514 (LOC100250514), mRNA
Maple_Unigene_BMK.26605	3.35e-06	-2.77208	down	--	--	Cellular Component: extracellular region (GO:0005576);; Biological Process: plant-type cell wall organization (GO:0009664);; Cellular Component: membrane (GO:0016020);;	--	sp|O22874|EXPA8_ARATH Expansin-A8 OS=Arabidopsis thaliana GN=EXPA8 PE=2 SV=1	Expansin (Fragment) GN=MdEXPA1 OS=Malus domestica (Apple) PE=2 SV=1	gi|37951213|dbj|BAD00015.1| expansin [Malus x domestica]	Dimocarpus longan expansin 3 (Exp3) mRNA, complete cds
Maple_Unigene_BMK.32040	0.000283442	-2.76757	down	--	--	Molecular Function: transporter activity (GO:0005215);; Biological Process: oligopeptide transport (GO:0006857);; Cellular Component: membrane (GO:0016020);;	--	sp|Q8LPL2|PTR32_ARATH Probable peptide/nitrate transporter At3g16180 OS=Arabidopsis thaliana GN=At3g16180 PE=2 SV=2	Nitrate transporter, putative GN=RCOM_1493010 OS=Ricinus communis (Castor bean) PE=3 SV=1	gi|255549914|ref|XP_002516008.1| nitrate transporter, putative [Ricinus communis]	Populus trichocarpa predicted protein, mRNA
Maple_Unigene_BMK.14789	0.000283442	-2.76757	down	--	--	Molecular Function: nucleotide binding (GO:0000166);; Molecular Function: protein kinase activity (GO:0004672);; Biological Process: phosphorylation (GO:0016310);;	--	sp|Q39529|LEC2_CLALU Agglutinin-2 OS=Cladrastis lutea PE=1 SV=1	Kinase, putative GN=RCOM_0818920 OS=Ricinus communis (Castor bean) PE=3 SV=1	gi|255554623|ref|XP_002518350.1| kinase, putative [Ricinus communis]	--
Maple_Unigene_BMK.44599	2.09e-06	-2.76616	down	--	--	Biological Process: metabolic process (GO:0008152);; Molecular Function: anthocyanidin 3-O-glucosyltransferase activity (GO:0047213);; Molecular Function: trans-zeatin O-beta-D-glucosyltransferase activity (GO:0050403);; Molecular Function: cis-zeatin O-beta-D-glucosyltransferase activity (GO:0050502);;	--	sp|Q9SK82|COGT2_ARATH Cytokinin-O-glucosyltransferase 2 OS=Arabidopsis thaliana GN=UGT85A1 PE=1 SV=1	UDP-glucuronosyltransferase, putative GN=RCOM_1036420 OS=Ricinus communis (Castor bean) PE=3 SV=1	gi|255545758|ref|XP_002513939.1| UDP-glucuronosyltransferase, putative [Ricinus communis]	Ricinus communis UDP-glucuronosyltransferase, putative, mRNA
Maple_Unigene_BMK.31332	1.28e-05	-2.76312	down	[S]	Function unknown	--	--	sp|Q9FL28|FLS2_ARATH LRR receptor-like serine/threonine-protein kinase FLS2 OS=Arabidopsis thaliana GN=FLS2 PE=1 SV=1	Putative uncharacterized protein GN=VITISV_022039 OS=Vitis vinifera (Grape) PE=4 SV=1	gi|147804670|emb|CAN66864.1| hypothetical protein VITISV_022039 [Vitis vinifera]	--
Maple_Unigene_BMK.19868	1.41e-11	-2.75347	down	--	--	Molecular Function: carboxylesterase activity (GO:0004091);; Cellular Component: extracellular space (GO:0005615);; Biological Process: systemic acquired resistance (GO:0009627);; Biological Process: response to salicylic acid stimulus (GO:0009751);; Biological Process: defense response to fungus, incompatible interaction (GO:0009817);; Biological Process: induced systemic resistance, ethylene me…	--	sp|Q9FLN0|GLIP1_ARATH GDSL esterase/lipase 1 OS=Arabidopsis thaliana GN=GLIP1 PE=1 SV=1	Esterase, putative GN=RCOM_0309620 OS=Ricinus communis (Castor bean) PE=4 SV=1	gi|255588375|ref|XP_002534586.1| Esterase precursor, putative [Ricinus communis]	--
Maple_Unigene_BMK.43731	7.4e-08	-2.74713	down	--	--	Biological Process: defense response (GO:0006952);; Biological Process: response to biotic stimulus (GO:0009607);;	--	sp|P43177|BEV1D_BETPN Major pollen allergen Bet v 1-D/H OS=Betula pendula GN=BETV1D PE=1 SV=2	Predicted protein GN=POPTRDRAFT_817750 OS=Populus trichocarpa (Western balsam poplar) PE=3 SV=1	gi|224076763|ref|XP_002304993.1| predicted protein [Populus trichocarpa]	Ricinus communis Major pollen allergen Bet v 1-D/H, putative, mRNA
Maple_Unigene_BMK.11998	1.71e-06	-2.74308	down	--	--	Biological Process: transcription, DNA-dependent (GO:0006351);; Biological Process: response to cold (GO:0009409);; Biological Process: response to water deprivation (GO:0009414);; Cellular Component: plastid (GO:0009536);; Biological Process: response to abscisic acid stimulus (GO:0009737);;	--	sp|Q1ECI2|ERF23_ARATH Ethylene-responsive transcription factor ERF023 OS=Arabidopsis thaliana GN=ERF023 PE=2 SV=1	Transcriptional factor TINY, putative GN=RCOM_0717590 OS=Ricinus communis (Castor bean) PE=4 SV=1	gi|255564667|ref|XP_002523328.1| Transcriptional factor TINY, putative [Ricinus communis]	Malus x domestica AP2 domain class transcription factor (AP2D33) mRNA, complete cds
Maple_Unigene_BMK.42606	0.00100685	-2.73719	down	--	--	--	--	--	Predicted protein GN=POPTRDRAFT_591232 OS=Populus trichocarpa (Western balsam poplar) PE=4 SV=1	gi|224110458|ref|XP_002333084.1| predicted protein [Populus trichocarpa]	Citrullus lanatus mitochondrion, complete genome
Maple_Unigene_BMK.18258	4.04e-12	-2.73429	down	--	--	Molecular Function: enzyme inhibitor activity (GO:0004857);; Cellular Component: intracellular (GO:0005622);; Biological Process: protein targeting to membrane (GO:0006612);; Biological Process: water transport (GO:0006833);; Cellular Component: plant-type cell wall (GO:0009505);; Biological Process: response to salt stress (GO:0009651);; Biological Process: response to fructose stimulus (GO:0009…	--	sp|Q9M3B0|PME34_ARATH Probable pectinesterase/pectinesterase inhibitor 34 OS=Arabidopsis thaliana GN=PME34 PE=2 SV=1	Pectinesterase GN=POPTRDRAFT_1100752 OS=Populus trichocarpa (Western balsam poplar) PE=3 SV=1	gi|224135163|ref|XP_002321999.1| predicted protein [Populus trichocarpa]	Cicer arietinum partial mRNA for pectin methylesterase (pme2 gene)
Maple_Unigene_BMK.18695	0.00041029	-2.73016	down	--	--	--	--	sp|Q9M1I2|PTR46_ARATH Probable peptide/nitrate transporter At3g54450 OS=Arabidopsis thaliana GN=At3g54450 PE=2 SV=1	Putative uncharacterized protein GN=VIT_08s0007g02020 OS=Vitis vinifera (Grape) PE=4 SV=1	gi|297740232|emb|CBI30414.3| unnamed protein product [Vitis vinifera]	--
Maple_Unigene_BMK.17852	1.58e-10	-2.72902	down	--	--	--	--	sp|Q9SUP6|WRK53_ARATH Probable WRKY transcription factor 53 OS=Arabidopsis thaliana GN=WRKY53 PE=1 SV=1	Putative uncharacterized protein GN=RCOM_1691430 OS=Ricinus communis (Castor bean) PE=4 SV=1	gi|255537749|ref|XP_002509941.1| hypothetical protein RCOM_1691430 [Ricinus communis]	Ricinus communis hypothetical protein, mRNA
Maple_Unigene_BMK.21040	8e-10	-2.7243	down	--	--	Biological Process: response to chitin (GO:0010200);;	--	sp|Q17RH7|TPRXL_HUMAN Putative protein TPRXL OS=Homo sapiens GN=TPRXL PE=5 SV=2	Putative uncharacterized protein GN=RCOM_1674160 OS=Ricinus communis (Castor bean) PE=4 SV=1	gi|255536791|ref|XP_002509462.1| conserved hypothetical protein [Ricinus communis]	Arabidopsis thaliana VQ motif-containing protein (AT1G28280) mRNA, complete cds
Maple_Unigene_BMK.27242	5.67e-10	-2.69964	down	[G]	Carbohydrate transport and metabolism	Biological Process: RNA splicing, via endonucleolytic cleavage and ligation (GO:0000394);; Cellular Component: vacuole (GO:0005773);; Cellular Component: cytosol (GO:0005829);; Biological Process: carbohydrate metabolic process (GO:0005975);; Biological Process: methionine biosynthetic process (GO:0009086);; Cellular Component: plant-type cell wall (GO:0009505);; Molecular Function: carbohydrate …	K01187|0.0|pop:POPTR_569295|alpha-glucosidase [EC:3.2.1.20]	sp|O04893|AGLU_SPIOL Alpha-glucosidase OS=Spinacia oleracea PE=1 SV=1	Predicted protein GN=POPTRDRAFT_569295 OS=Populus trichocarpa (Western balsam poplar) PE=4 SV=1	gi|224117828|ref|XP_002317678.1| predicted protein [Populus trichocarpa]	PREDICTED: Vitis vinifera misc_RNA (LOC100264744), miscRNA
Maple_Unigene_BMK.4659	0.00417201	-2.69445	down	--	--	--	--	--	--	--	Nephelium ramboutan-ake simple sequence repeat NRA4
Maple_Unigene_BMK.21745	1.97e-11	-2.6921	down	[C]	Energy production and conversion	Molecular Function: ATP binding (GO:0005524);; Molecular Function: hydrogen-exporting ATPase activity, phosphorylative mechanism (GO:0008553);; Cellular Component: chloroplast thylakoid membrane (GO:0009535);; Biological Process: ATP synthesis coupled proton transport (GO:0015986);; Biological Process: ATP hydrolysis coupled proton transport (GO:0015991);; Cellular Component: proton-transporting …	K02112|0.0|vvi:4025008|F-type H+-transporting ATPase subunit beta [EC:3.6.3.14]	sp|Q09X10|ATPB_MORIN ATP synthase subunit beta, chloroplastic OS=Morus indica GN=atpB PE=3 SV=1	ATP synthase subunit beta (Fragment) GN=atpB OS=Pistacia vera (Pistachio) PE=3 SV=2	gi|56675679|emb|CAB63702.2| atp synthase beta subunit [Pistacia vera]	Citrus sinensis chloroplast, complete genome
Maple_Unigene_BMK.1841	0.000595053	-2.69176	down	--	--	--	--	sp|Q39967|ALL5_HEVBR Major latex allergen Hev b 5 OS=Hevea brasiliensis PE=1 SV=3	Putative uncharacterized protein OS=Populus trichocarpa (Western balsam poplar) PE=2 SV=1	gi|118481471|gb|ABK92678.1| unknown [Populus trichocarpa]	Hevea brasiliensis isolate SSH3 mRNA sequence
Maple_Unigene_BMK.14616	8.18e-08	-2.68653	down	--	--	Biological Process: response to stress (GO:0006950);; Biological Process: response to chemical stimulus (GO:0042221);; Biological Process: regulation of cellular process (GO:0050794);;	--	--	Predicted protein GN=POPTRDRAFT_575987 OS=Populus trichocarpa (Western balsam poplar) PE=4 SV=1	gi|224139566|ref|XP_002323172.1| predicted protein [Populus trichocarpa]	Glycine max strain Williams 82 clone GM_WBb0082B18, complete sequence
Maple_Unigene_BMK.26354	4.18e-07	-2.67347	down	--	--	Cellular Component: chloroplast (GO:0009507);; Cellular Component: membrane (GO:0016020);; Cellular Component: cytoplasmic membrane-bounded vesicle (GO:0016023);;	--	--	Putative uncharacterized protein GN=VIT_19s0014g02770 OS=Vitis vinifera (Grape) PE=4 SV=1	gi|302143012|emb|CBI20307.3| unnamed protein product [Vitis vinifera]	--
Maple_Unigene_BMK.13558	4.57e-06	-2.66914	down	--	--	--	--	--	AP2 domain transcription factor RAP2.3, putative GN=RCOM_1438370 OS=Ricinus communis (Castor bean) PE=4 SV=1	gi|255543212|ref|XP_002512669.1| AP2 domain transcription factor RAP2.3, putative [Ricinus communis]	--
Maple_Unigene_BMK.22825	7.5e-06	-2.66807	down	--	--	Molecular Function: glucan exo-1,3-beta-glucosidase activity (GO:0004338);;	--	sp|P23535|E13B_PHAVU Glucan endo-1,3-beta-glucosidase, basic isoform OS=Phaseolus vulgaris PE=2 SV=1	Glucanase (Fragment) GN=PR2 OS=Rosa roxburghii PE=3 SV=1	gi|82754321|gb|ABB89957.1| glucanase [Rosa roxburghii]	--
Maple_Unigene_BMK.25622	2.97e-09	-2.66762	down	--	--	Cellular Component: intracellular (GO:0005622);; Cellular Component: plasma membrane (GO:0005886);; Biological Process: protein targeting to membrane (GO:0006612);; Biological Process: response to insect (GO:0009625);; Biological Process: systemic acquired resistance, salicylic acid mediated signaling pathway (GO:0009862);; Biological Process: positive regulation of flavonoid biosynthetic process…	--	sp|Q94BT2|AIR12_ARATH Auxin-induced in root cultures protein 12 OS=Arabidopsis thaliana GN=AIR12 PE=1 SV=3	Predicted protein GN=POPTRDRAFT_664838 OS=Populus trichocarpa (Western balsam poplar) PE=4 SV=1	gi|224129114|ref|XP_002320504.1| predicted protein [Populus trichocarpa]	Ricinus communis dopamine beta-monooxygenase, putative, mRNA
Maple_Unigene_BMK.32659	6.29e-09	-2.66521	down	--	--	Biological Process: MAPK cascade (GO:0000165);; Biological Process: regulation of response to biotic stimulus (GO:0002831);; Molecular Function: calmodulin binding (GO:0005516);; Cellular Component: Golgi apparatus (GO:0005794);; Cellular Component: plasma membrane (GO:0005886);; Biological Process: protein targeting to membrane (GO:0006612);; Cellular Component: plasmodesma (GO:0009506);; Biolog…	--	sp|Q94KB7|MLO6_ARATH MLO-like protein 6 OS=Arabidopsis thaliana GN=MLO6 PE=2 SV=2	Protein MLO, putative GN=RCOM_1401100 OS=Ricinus communis (Castor bean) PE=4 SV=1	gi|255570839|ref|XP_002526372.1| Protein MLO, putative [Ricinus communis]	Ricinus communis Protein MLO, putative, mRNA
Maple_Unigene_BMK.26812	1.34e-08	-2.66261	down	--	--	--	--	sp|P14918|EXTN_MAIZE Extensin OS=Zea mays GN=HRGP PE=2 SV=1	Putative uncharacterized protein GN=RCOM_0144270 OS=Ricinus communis (Castor bean) PE=4 SV=1	gi|255585261|ref|XP_002533331.1| conserved hypothetical protein [Ricinus communis]	Solanum lycopersicum cDNA, clone: LEFL1021CF05, HTC in leaf
Maple_Unigene_BMK.29619	4.94e-10	-2.66145	down	--	--	Cellular Component: intracellular (GO:0005622);; Biological Process: protein targeting to membrane (GO:0006612);; Biological Process: anion transport (GO:0006820);; Biological Process: oligopeptide transport (GO:0006857);; Biological Process: nucleotide transport (GO:0006862);; Biological Process: ER to Golgi vesicle-mediated transport (GO:0006888);; Biological Process: cellular membrane fusion (…	--	sp|Q9FG72|OPT1_ARATH Oligopeptide transporter 1 OS=Arabidopsis thaliana GN=OPT1 PE=2 SV=1	Putative uncharacterized protein GN=VITISV_040328 OS=Vitis vinifera (Grape) PE=4 SV=1	gi|147865338|emb|CAN79818.1| hypothetical protein VITISV_040328 [Vitis vinifera]	Populus trichocarpa oligopeptide transporter OPT family, mRNA
Maple_Unigene_BMK.23800	3.59e-10	-2.65983	down	--	--	Biological Process: response to organic substance (GO:0010033);; Molecular Function: hydrolase activity, acting on ester bonds (GO:0016788);; Biological Process: response to other organism (GO:0051707);;	--	sp|Q9FLN0|GLIP1_ARATH GDSL esterase/lipase 1 OS=Arabidopsis thaliana GN=GLIP1 PE=1 SV=1	Zinc finger protein, putative GN=RCOM_0309210 OS=Ricinus communis (Castor bean) PE=4 SV=1	gi|255588373|ref|XP_002534585.1| zinc finger protein, putative [Ricinus communis]	--
Maple_Unigene_BMK.34348	0.000365063	-2.65619	down	--	--	--	--	sp|P13983|EXTN_TOBAC Extensin OS=Nicotiana tabacum GN=HRGPNT3 PE=2 SV=1	Putative uncharacterized protein GN=RCOM_0189850 OS=Ricinus communis (Castor bean) PE=4 SV=1	gi|255582356|ref|XP_002531967.1| conserved hypothetical protein [Ricinus communis]	--
Maple_Unigene_BMK.32178	9.62e-08	-2.64519	down	--	--	Biological Process: metabolic process (GO:0008152);; Biological Process: response to sucrose stimulus (GO:0009744);; Biological Process: response to fructose stimulus (GO:0009750);; Molecular Function: amino acid binding (GO:0016597);;	--	--	Amino acid binding protein, putative GN=RCOM_0464870 OS=Ricinus communis (Castor bean) PE=4 SV=1	gi|255575072|ref|XP_002528441.1| amino acid binding protein, putative [Ricinus communis]	Populus trichocarpa predicted protein, mRNA
Maple_Unigene_BMK.37581	0.00641395	-2.64015	down	--	--	--	--	--	Predicted protein GN=POPTRDRAFT_1108909 OS=Populus trichocarpa (Western balsam poplar) PE=4 SV=1	gi|224069164|ref|XP_002326290.1| predicted protein [Populus trichocarpa]	--
Maple_Unigene_BMK.18415	8.85e-08	-2.63642	down	--	--	--	--	--	--	--	Solanum lycopersicum cv. Heinz 1706, chromosome 11 BAC clone C11SLe0053P22, complete sequence
Maple_Unigene_BMK.27744	6.5e-08	-2.63002	down	[OU]	--	Molecular Function: serine-type endopeptidase activity (GO:0004252);; Molecular Function: ATP binding (GO:0005524);; Biological Process: proteolysis (GO:0006508);; Cellular Component: chloroplast (GO:0009507);;	--	sp|A0A360|CLPP_COFAR ATP-dependent Clp protease proteolytic subunit OS=Coffea arabica GN=clpP PE=3 SV=1	ATP-dependent Clp protease proteolytic subunit (Fragment) OS=Prunus dulcis (Almond) PE=2 SV=1	gi|148807233|gb|ABR13326.1| putative ATP-dependent protease proteolytic subunit [Prunus dulcis]	Berberidopsis corallina voucher FLAS:M.J. Moore 326 clp protease proteolytic subunit protein (clpP) gene, complete cds; chloroplast
Maple_Unigene_BMK.24807	8.17e-08	-2.62819	down	--	--	--	--	sp|Q7XJM8|SCL27_ARATH Scarecrow-like protein 27 OS=Arabidopsis thaliana GN=SCL27 PE=2 SV=1	Putative uncharacterized protein GN=RCOM_1062060 OS=Ricinus communis (Castor bean) PE=4 SV=1	gi|255576090|ref|XP_002528940.1| conserved hypothetical protein [Ricinus communis]	PREDICTED: Vitis vinifera hypothetical protein LOC100252271 (LOC100252271), mRNA
Maple_Unigene_BMK.29948	4.12e-11	-2.62288	down	--	--	Cellular Component: photosystem II (GO:0009523);; Cellular Component: chloroplast thylakoid membrane (GO:0009535);; Biological Process: photosynthetic electron transport chain (GO:0009767);; Cellular Component: integral to membrane (GO:0016021);; Molecular Function: chlorophyll binding (GO:0016168);; Biological Process: protein-chromophore linkage (GO:0018298);;	K02704|0.0|vvi:4025125|photosystem II CP47 chlorophyll apoprotein	sp|B1A961|PSBB_CARPA Photosystem II CP47 chlorophyll apoprotein OS=Carica papaya GN=psbB PE=3 SV=1	Photosystem II CP47 chlorophyll apoprotein GN=psbB OS=Heuchera sanguinea (Coralbells) PE=3 SV=1	gi|157689773|gb|ABV65498.1| photosystem II CP47 chlorophyll apoprotein [Heuchera sanguinea]	Cupaniopsis anacardioides photosystem II CP47 chlorophyll apoprotein (psbB) gene, partial cds; photosystem II protein T (psbT) and photosystem II protein N (psbN) genes, complete cds; and photosystem II phosphoprotein (psbH) gene, partial cds; chloroplast
Maple_Unigene_BMK.17801	9.54e-08	-2.61828	down	--	--	Cellular Component: nucleus (GO:0005634);; Cellular Component: cytoplasm (GO:0005737);;	--	sp|Q8MP30|Y7791_DICDI Uncharacterized histidine-rich protein DDB_G0274557 OS=Dictyostelium discoideum GN=DDB_G0274557 PE=4 SV=1	Putative uncharacterized protein GN=RCOM_0530890 OS=Ricinus communis (Castor bean) PE=4 SV=1	gi|255571994|ref|XP_002526938.1| hypothetical protein RCOM_0530890 [Ricinus communis]	TSA: Arachis duranensis DurSNP_c6028.Ardu mRNA sequence
Maple_Unigene_BMK.21807	3.04e-07	-2.61683	down	[K]	Transcription	Molecular Function: transcription regulatory region sequence-specific DNA binding (GO:0000976);; Molecular Function: sequence-specific DNA binding transcription factor activity (GO:0003700);; Cellular Component: nucleus (GO:0005634);; Biological Process: regulation of transcription, DNA-dependent (GO:0006355);; Biological Process: response to blue light (GO:0009637);; Biological Process: response…	--	sp|Q9FN29|ATB52_ARATH Homeobox-leucine zipper protein ATHB-52 OS=Arabidopsis thaliana GN=ATHB-52 PE=2 SV=1	Predicted protein GN=POPTRDRAFT_594622 OS=Populus trichocarpa (Western balsam poplar) PE=3 SV=1	gi|224133390|ref|XP_002328030.1| predicted protein [Populus trichocarpa]	--
Maple_Unigene_BMK.19926	8.61e-11	-2.61272	down	[Z]	Cytoskeleton	--	K10355|1e-58|osa:4349863|actin, other eukaryote	sp|P24902|ACT_PINCO Actin (Fragment) OS=Pinus contorta PE=3 SV=1	Actin (Fragment) OS=Viscum album (European mistletoe) PE=2 SV=1	gi|56961766|gb|AAW31852.1| actin [Vitis vinifera]	TSA: Panax ginseng strain Shi Zhu Shen contig03670.Pagi mRNA sequence
Maple_Unigene_BMK.22709	0.00125845	-2.61175	down	--	--	Molecular Function: protein kinase activity (GO:0004672);; Molecular Function: ATP binding (GO:0005524);; Cellular Component: plasma membrane (GO:0005886);; Biological Process: protein phosphorylation (GO:0006468);; Molecular Function: chitin binding (GO:0008061);; Biological Process: cell wall macromolecule catabolic process (GO:0016998);; Biological Process: innate immune response (GO:0045087);;	--	--	Predicted protein GN=POPTRDRAFT_563086 OS=Populus trichocarpa (Western balsam poplar) PE=4 SV=1	gi|224096894|ref|XP_002310777.1| predicted protein [Populus trichocarpa]	Populus trichocarpa predicted protein, mRNA
Maple_Unigene_BMK.35743	4.19e-10	-2.60548	down	[S]	Function unknown	--	--	sp|Q9C9H7|RLP12_ARATH Receptor-like protein 12 OS=Arabidopsis thaliana GN=RLP12 PE=2 SV=1	Putative uncharacterized protein GN=VITISV_036826 OS=Vitis vinifera (Grape) PE=4 SV=1	gi|147782974|emb|CAN66148.1| hypothetical protein VITISV_036826 [Vitis vinifera]	Vitis vinifera contig VV78X027958.4, whole genome shotgun sequence
Maple_Unigene_BMK.23718	0.000151724	-2.60405	down	--	--	Biological Process: cell differentiation (GO:0030154);; Biological Process: auxin transport (GO:0060918);;	--	sp|O23969|SF21_HELAN Pollen-specific protein SF21 OS=Helianthus annuus GN=SF21 PE=2 SV=1	Putative uncharacterized protein GN=VIT_14s0030g01790 OS=Vitis vinifera (Grape) PE=4 SV=1	gi|225451275|ref|XP_002277583.1| PREDICTED: hypothetical protein [Vitis vinifera]	PREDICTED: Vitis vinifera hypothetical protein LOC100262295 (LOC100262295), mRNA
Maple_Unigene_BMK.24207	8.13e-08	-2.60373	down	--	--	--	K13424|1e-54|pop:POPTR_577093|WRKY transcription factor 33	sp|Q9C5T3|WRK26_ARATH Probable WRKY transcription factor 26 OS=Arabidopsis thaliana GN=WRKY26 PE=2 SV=2	WRKY transcription factor 17 (Fragment) OS=Dimocarpus longan PE=2 SV=1	gi|224140533|ref|XP_002323637.1| predicted protein [Populus trichocarpa]	Nicotiana benthamiana NbWRKY8 mRNA for double WRKY type transfactor, complete cds
Maple_Unigene_BMK.31554	0.0033414	-2.6	down	[S]	Function unknown	Molecular Function: catalytic activity (GO:0003824);;	--	sp|Q8VZG8|Y4885_ARATH Probable LRR receptor-like serine/threonine-protein kinase At4g08850 OS=Arabidopsis thaliana GN=At4g08850 PE=1 SV=3	Predicted protein GN=POPTRDRAFT_779665 OS=Populus trichocarpa (Western balsam poplar) PE=4 SV=1	gi|224142513|ref|XP_002324601.1| predicted protein [Populus trichocarpa]	--
Maple_Unigene_BMK.28373	2.42e-07	-2.5997	down	[C]	Energy production and conversion	Cellular Component: plasma membrane (GO:0005886);; Cellular Component: chloroplast thylakoid membrane (GO:0009535);; Cellular Component: integral to membrane (GO:0016021);; Biological Process: plasma membrane ATP synthesis coupled proton transport (GO:0042777);; Cellular Component: proton-transporting ATP synthase complex, coupling factor F(o) (GO:0045263);; Molecular Function: hydrogen ion trans…	K02108|1e-160|vvi:4025095|F-type H+-transporting ATPase subunit a [EC:3.6.3.14]	sp|B1A923|ATPI_CARPA ATP synthase subunit a, chloroplastic OS=Carica papaya GN=atpI PE=3 SV=1	ATP synthase subunit a, chloroplastic GN=atpI OS=Gonystylus bancanus PE=3 SV=1	gi|167391793|ref|YP_001671671.1| ATP synthase CF0 A subunit [Carica papaya]	Citrus sinensis chloroplast, complete genome
Maple_Unigene_BMK.13559	2.47e-06	-2.59522	down	--	--	Biological Process: amino acid transport (GO:0006865);; Biological Process: toxin catabolic process (GO:0009407);; Biological Process: response to water deprivation (GO:0009414);; Biological Process: response to salt stress (GO:0009651);; Biological Process: response to ethylene stimulus (GO:0009723);; Biological Process: response to abscisic acid stimulus (GO:0009737);; Biological Process: respo…	--	sp|Q9FH54|EF114_ARATH Ethylene-responsive transcription factor ERF114 OS=Arabidopsis thaliana GN=ERF114 PE=2 SV=1	AP2 domain transcription factor RAP2.3, putative GN=RCOM_1438370 OS=Ricinus communis (Castor bean) PE=4 SV=1	gi|255543212|ref|XP_002512669.1| AP2 domain transcription factor RAP2.3, putative [Ricinus communis]	Ricinus communis AP2 domain transcription factor RAP2.3, putative, mRNA
Maple_Unigene_BMK.741	0.000323527	-2.5952	down	[S]	Function unknown	Biological Process: immune response-regulating signaling pathway (GO:0002764);; Molecular Function: protein kinase activity (GO:0004672);; Molecular Function: protein binding (GO:0005515);; Biological Process: plant-type hypersensitive response (GO:0009626);; Biological Process: defense response signaling pathway, resistance gene-independent (GO:0010204);; Biological Process: regulation of anion …	--	sp|C0LGT6|EFR_ARATH LRR receptor-like serine/threonine-protein kinase EFR OS=Arabidopsis thaliana GN=EFR PE=1 SV=1	Serine-threonine protein kinase, plant-type, putative GN=RCOM_0550400 OS=Ricinus communis (Castor bean) PE=4 SV=1	gi|255583729|ref|XP_002532618.1| serine-threonine protein kinase, plant-type, putative [Ricinus communis]	--
Maple_Unigene_BMK.13414	0.00986913	-2.58372	down	--	--	Molecular Function: mannan synthase activity (GO:0051753);;	K13680|3e-27|pop:POPTR_594843|beta-mannan synthase [EC:2.4.1.32]	sp|Q9LQC9|CSLA3_ARATH Probable mannan synthase 3 OS=Arabidopsis thaliana GN=CSLA3 PE=2 SV=1	Predicted protein GN=POPTRDRAFT_594843 OS=Populus trichocarpa (Western balsam poplar) PE=4 SV=1	gi|297734855|emb|CBI17089.3| unnamed protein product [Vitis vinifera]	Populus trichocarpa predicted protein, mRNA
Maple_Unigene_BMK.32780	2.9e-10	-2.57678	down	--	--	--	--	--	Calmodulin-binding protein OS=Populus euphratica (Euphrates poplar) PE=2 SV=1	gi|224091673|ref|XP_002309326.1| predicted protein [Populus trichocarpa]	Populus trichocarpa predicted protein, mRNA
Maple_Unigene_BMK.11879	3.79e-05	-2.57674	down	[M]	Cell wall/membrane/envelope biogenesis	Cellular Component: Golgi apparatus (GO:0005794);; Cellular Component: plant-type cell wall (GO:0009505);; Cellular Component: plasmodesma (GO:0009506);; Biological Process: trichoblast differentiation (GO:0010054);; Biological Process: brassinosteroid biosynthetic process (GO:0016132);; Cellular Component: anchored to plasma membrane (GO:0046658);;	--	sp|Q9FFH6|FLA13_ARATH Fasciclin-like arabinogalactan protein 13 OS=Arabidopsis thaliana GN=FLA13 PE=1 SV=1	Putative uncharacterized protein GN=RCOM_1171550 OS=Ricinus communis (Castor bean) PE=4 SV=1	gi|255553599|ref|XP_002517840.1| conserved hypothetical protein [Ricinus communis]	Lotus japonicus genomic DNA, chromosome 1, clone: LjT45O08, TM2015, complete sequence
Maple_Unigene_BMK.30637	9.87e-11	-2.5764	down	[E]	Amino acid transport and metabolism	Molecular Function: transporter activity (GO:0005215);; Biological Process: oligopeptide transport (GO:0006857);; Cellular Component: membrane (GO:0016020);;	--	sp|Q9SX20|PTR18_ARATH Probable nitrite transporter At1g68570 OS=Arabidopsis thaliana GN=At1g68570 PE=2 SV=1	Peptide transporter PTR GN=MTR_5g055000 OS=Medicago truncatula (Barrel medic) PE=4 SV=1	gi|312281607|dbj|BAJ33669.1| unnamed protein product [Thellungiella halophila]	Ricinus communis nitrate transporter, putative, mRNA
Maple_Unigene_BMK.18494	1.7e-06	-2.57497	down	--	--	Cellular Component: chloroplast (GO:0009507);;	--	sp|P36069|PMU1_YEAST Probable phosphomutase PMU1 OS=Saccharomyces cerevisiae GN=PMU1 PE=1 SV=1	Putative uncharacterized protein GN=VITISV_033511 OS=Vitis vinifera (Grape) PE=4 SV=1	gi|225459002|ref|XP_002285596.1| PREDICTED: hypothetical protein [Vitis vinifera]	Ricinus communis catalytic, putative, mRNA
Maple_Unigene_BMK.24208	5.72e-08	-2.57371	down	--	--	Molecular Function: sequence-specific DNA binding transcription factor activity (GO:0003700);; Biological Process: regulation of transcription, DNA-dependent (GO:0006355);; Molecular Function: sequence-specific DNA binding (GO:0043565);;	K13424|6e-90|pop:POPTR_577093|WRKY transcription factor 33	sp|Q8S8P5|WRK33_ARATH Probable WRKY transcription factor 33 OS=Arabidopsis thaliana GN=WRKY33 PE=1 SV=2	WRKY transcription factor 17 (Fragment) OS=Dimocarpus longan PE=2 SV=1	gi|34101213|gb|AAQ57645.1| WRKY 10 [Theobroma cacao]	Malus x domestica WRKY domain class transcription factor (WRKY9) mRNA, complete cds
Maple_Unigene_BMK.21759	2.4e-08	-2.57081	down	[C]	Energy production and conversion	Biological Process: transport (GO:0006810);; Molecular Function: NADH dehydrogenase (ubiquinone) activity (GO:0008137);; Cellular Component: chloroplast thylakoid membrane (GO:0009535);; Molecular Function: metal ion binding (GO:0046872);; Molecular Function: quinone binding (GO:0048038);; Molecular Function: 4 iron, 4 sulfur cluster binding (GO:0051539);; Biological Process: oxidation-reduction …	K05582|1e-140|vvi:4025142|NADH dehydrogenase I subunit K [EC:1.6.5.3]	sp|Q09MH4|NDHK_CITSI NAD(P)H-quinone oxidoreductase subunit K, chloroplastic OS=Citrus sinensis GN=ndhK PE=3 SV=1	NAD(P)H-quinone oxidoreductase subunit K, chloroplastic GN=ndhK OS=Berberidopsis corallina PE=3 SV=1	gi|114329660|ref|YP_740479.1| NADH-plastoquinone oxidoreductase subunit K [Citrus sinensis]	Citrus sinensis chloroplast, complete genome
Maple_Unigene_BMK.19925	1.41e-10	-2.57074	down	[Z]	Cytoskeleton	Molecular Function: ATP binding (GO:0005524);; Cellular Component: cell wall (GO:0005618);; Cellular Component: nucleolus (GO:0005730);; Cellular Component: mitochondrion (GO:0005739);; Cellular Component: cytoskeleton (GO:0005856);; Cellular Component: plasma membrane (GO:0005886);; Biological Process: response to light stimulus (GO:0009416);; Biological Process: response to wounding (GO:0009611…	--	sp|O81221|ACT_GOSHI Actin OS=Gossypium hirsutum PE=3 SV=1	Putative uncharacterized protein GN=OsI_18129 OS=Oryza sativa subsp. indica (Rice) PE=3 SV=1	gi|218195939|gb|EEC78366.1| hypothetical protein OsI_18129 [Oryza sativa Indica Group]	PREDICTED: Vitis vinifera hypothetical protein LOC100246825 (LOC100246825), mRNA
Maple_Unigene_BMK.32592	7.47e-06	-2.56667	down	--	--	Cellular Component: plastid (GO:0009536);;	K03689|1e-09|sbi:SobiCp011|cytochrome b6-f complex subunit 8	sp|B5LMM3|PETN_CICAR Cytochrome b6-f complex subunit 8 OS=Cicer arietinum GN=petN PE=3 SV=1	Putative uncharacterized protein GN=ARALYDRAFT_893970 OS=Arabidopsis lyrata subsp. lyrata (Lyre-leaved rock-cress) PE=4 SV=1	gi|297840943|ref|XP_002888353.1| hypothetical protein ARALYDRAFT_893970 [Arabidopsis lyrata subsp. lyrata]	Citrus sinensis chloroplast, complete genome
Maple_Unigene_BMK.34555	0.000452357	-2.56209	down	--	--	--	--	sp|P14381|YTX2_XENLA Transposon TX1 uncharacterized 149 kDa protein OS=Xenopus laevis PE=4 SV=1	Putative uncharacterized protein OS=Beta vulgaris subsp. vulgaris PE=4 SV=1	gi|242070283|ref|XP_002450418.1| hypothetical protein SORBIDRAFT_05g005061 [Sorghum bicolor]	--
Maple_Unigene_BMK.22038	7.16e-09	-2.55259	down	[RTKL]	--	Molecular Function: protein serine/threonine kinase activity (GO:0004674);; Molecular Function: transmembrane receptor protein tyrosine kinase activity (GO:0004714);; Molecular Function: ATP binding (GO:0005524);; Biological Process: protein phosphorylation (GO:0006468);; Biological Process: recognition of pollen (GO:0048544);;	--	sp|Q9FLV4|Y5248_ARATH G-type lectin S-receptor-like serine/threonine-protein kinase At5g24080 OS=Arabidopsis thaliana GN=At5g24080 PE=1 SV=1	ATP binding protein, putative GN=RCOM_1148780 OS=Ricinus communis (Castor bean) PE=3 SV=1	gi|255573210|ref|XP_002527534.1| ATP binding protein, putative [Ricinus communis]	Ricinus communis ATP binding protein, putative, mRNA
Maple_Unigene_BMK.30896	7.65e-10	-2.54744	down	--	--	Molecular Function: signal transducer activity (GO:0004871);; Biological Process: polyamine catabolic process (GO:0006598);; Biological Process: cell-cell signaling (GO:0007267);; Cellular Component: plant-type cell wall (GO:0009505);; Cellular Component: plasmodesma (GO:0009506);; Biological Process: phenylpropanoid metabolic process (GO:0009698);; Biological Process: response to brassinosteroid…	--	--	Rapid alkalinization factor OS=Litchi chinensis (Lychee) PE=2 SV=1	gi|154269428|gb|ABS72341.1| rapid alkalinization factor precursor [Litchi chinensis]	Litchi chinensis rapid alkalinization factor precursor, mRNA, complete cds
Maple_Unigene_BMK.5538	4.83e-10	-2.54013	down	--	--	Cellular Component: mitochondrion (GO:0005739);; Cellular Component: chloroplast (GO:0009507);;	--	sp|Q3BAI2|YCX91_PHAAO Uncharacterized protein ORF91 OS=Phalaenopsis aphrodite subsp. formosana PE=4 SV=1	Cell wall-associated hydrolase (Fragment) GN=MTR_069s1001 OS=Medicago truncatula (Barrel medic) PE=4 SV=1	gi|78103323|ref|YP_358637.1| hypothetical protein PhapfoPp091 [Phalaenopsis aphrodite subsp. formosana]	Mangifera indica large single copy region, partial sequence; and inverted repeat, complete sequence; chloroplast
Maple_Unigene_BMK.5499	7.22e-10	-2.53114	down	--	--	Biological Process: MAPK cascade (GO:0000165);; Biological Process: response to reactive oxygen species (GO:0000302);; Cellular Component: intracellular (GO:0005622);; Biological Process: protein targeting to membrane (GO:0006612);; Biological Process: response to cold (GO:0009409);; Biological Process: response to wounding (GO:0009611);; Biological Process: abscisic acid mediated signaling pathw…	--	sp|Q39644|LEA5_CITSI Late embryogenesis abundant protein Lea5 OS=Citrus sinensis GN=LEA5 PE=2 SV=1	Group 5 late embryogenesis abundant protein GN=LEA5 OS=Citrus unshiu (Satsuma mandarin) PE=4 SV=1	gi|22653808|sp|Q39644.1|LEA5_CITSI RecName: Full=Late embryogenesis abundant protein Lea5	C.sinensis mRNA for Lea5 protein
Maple_Unigene_BMK.26587	2.44e-10	-2.52921	down	--	--	Molecular Function: dicarboxylic acid transmembrane transporter activity (GO:0005310);; Cellular Component: mitochondrial inner membrane (GO:0005743);; Biological Process: dicarboxylic acid transport (GO:0006835);; Biological Process: mitochondrial transport (GO:0006839);; Biological Process: response to wounding (GO:0009611);; Biological Process: response to mechanical stimulus (GO:0009612);; Bi…	--	sp|Q54PY7|M2OM_DICDI Probable mitochondrial 2-oxoglutarate/malate carrier protein OS=Dictyostelium discoideum GN=ucpC PE=3 SV=1	Putative uncharacterized protein GN=VIT_18s0001g07320 OS=Vitis vinifera (Grape) PE=3 SV=1	gi|225459119|ref|XP_002285693.1| PREDICTED: hypothetical protein [Vitis vinifera]	Lotus japonicus cDNA, clone: LjFL2-037-BE06, HTC
Maple_Unigene_BMK.26231	0.000633392	-2.5282	down	--	--	Biological Process: metabolic process (GO:0008152);; Molecular Function: kinase activity (GO:0016301);;	--	sp|Q8GT95|PGIP1_ORYSJ Polygalacturonase inhibitor 1 OS=Oryza sativa subsp. japonica GN=FOR1 PE=2 SV=1	Predicted protein GN=POPTRDRAFT_555046 OS=Populus trichocarpa (Western balsam poplar) PE=4 SV=1	gi|224072885|ref|XP_002303927.1| predicted protein [Populus trichocarpa]	--
Maple_Unigene_BMK.44924	1.99e-05	-2.5202	down	[G]	Carbohydrate transport and metabolism	Cellular Component: membrane (GO:0016020);; Molecular Function: pectate lyase activity (GO:0030570);;	K01728|1e-152|pop:POPTR_575272|pectate lyase [EC:4.2.2.2]	sp|Q9C5M8|PLY18_ARATH Probable pectate lyase 18 OS=Arabidopsis thaliana GN=At4g24780 PE=2 SV=2	Putative uncharacterized protein OS=Populus trichocarpa (Western balsam poplar) PE=2 SV=1	gi|118481166|gb|ABK92535.1| unknown [Populus trichocarpa]	Populus trichocarpa predicted protein, mRNA
Maple_Unigene_BMK.27505	4.87e-10	-2.51637	down	--	--	--	--	--	Putative uncharacterized protein GN=RCOM_0559550 OS=Ricinus communis (Castor bean) PE=4 SV=1	gi|255558454|ref|XP_002520252.1| conserved hypothetical protein [Ricinus communis]	Ricinus communis conserved hypothetical protein, mRNA
Maple_Unigene_BMK.16533	0.00150851	-2.50836	down	--	--	Biological Process: DNA repair (GO:0006281);; Biological Process: DNA methylation (GO:0006306);; Molecular Function: hydrolase activity, acting on glycosyl bonds (GO:0016798);;	--	--	Predicted protein GN=POPTRDRAFT_711860 OS=Populus trichocarpa (Western balsam poplar) PE=4 SV=1	gi|224072406|ref|XP_002303720.1| predicted protein [Populus trichocarpa]	Ricinus communis DNA-3-methyladenine glycosylase, putative, mRNA
Maple_Unigene_BMK.30129	4.05e-09	-2.50671	down	[P]	Inorganic ion transport and metabolism	Cellular Component: endoplasmic reticulum (GO:0005783);; Biological Process: protein targeting to vacuole (GO:0006623);; Biological Process: cation transport (GO:0006812);; Biological Process: regulation of pH (GO:0006885);; Cellular Component: endomembrane system (GO:0012505);; Molecular Function: sodium:hydrogen antiporter activity (GO:0015385);; Cellular Component: integral to membrane (GO:001…	--	sp|Q9M353|CHX20_ARATH Cation/H(+) antiporter 20 OS=Arabidopsis thaliana GN=CHX20 PE=2 SV=1	Putative uncharacterized protein GN=VIT_08s0007g00030 OS=Vitis vinifera (Grape) PE=4 SV=1	gi|225440302|ref|XP_002269591.1| PREDICTED: hypothetical protein [Vitis vinifera]	Medicago truncatula chromosome 7 clone mth2-70c24, complete sequence
Maple_Unigene_BMK.23808	4.03e-10	-2.50361	down	--	--	Molecular Function: carboxylesterase activity (GO:0004091);; Cellular Component: extracellular region (GO:0005576);; Cellular Component: Golgi apparatus (GO:0005794);; Cellular Component: cytosol (GO:0005829);; Cellular Component: plant-type cell wall (GO:0009505);; Cellular Component: plasmodesma (GO:0009506);; Biological Process: pollen exine formation (GO:0010584);; Cellular Component: membran…	--	--	Predicted protein GN=POPTRDRAFT_549850 OS=Populus trichocarpa (Western balsam poplar) PE=4 SV=1	gi|224055948|ref|XP_002298705.1| predicted protein [Populus trichocarpa]	TSA: Jatropha curcas Contig11257, mRNA sequence
Maple_Unigene_BMK.29455	4.36e-10	-2.50086	down	[G]	Carbohydrate transport and metabolism	Molecular Function: starch synthase activity (GO:0009011);; Biological Process: glucan biosynthetic process (GO:0009250);;	K13679|0.0|vvi:100243677|granule-bound starch synthase [EC:2.4.1.242]	sp|O82627|SSG1_ANTMA Granule-bound starch synthase 1, chloroplastic/amyloplastic OS=Antirrhinum majus GN=WAXY PE=2 SV=1	Granule-bound starch synthase 1 OS=Gossypium hirsutum (Upland cotton) PE=2 SV=1	gi|258489621|gb|ACV72639.1| granule-bound starch synthase 1 [Gossypium hirsutum]	Gossypium hirsutum granule-bound starch synthase 1 mRNA, complete cds
Maple_Unigene_BMK.7471	0.00748516	-2.5007	down	[G]	Carbohydrate transport and metabolism	Cellular Component: membrane (GO:0016020);; Molecular Function: pectate lyase activity (GO:0030570);;	K01728|1e-76|rcu:RCOM_1022270|pectate lyase [EC:4.2.2.2]	sp|Q944R1|PLY15_ARATH Probable pectate lyase 15 OS=Arabidopsis thaliana GN=At4g13710 PE=2 SV=1	Pectate lyase, putative GN=RCOM_1022270 OS=Ricinus communis (Castor bean) PE=4 SV=1	gi|255554212|ref|XP_002518146.1| Pectate lyase precursor, putative [Ricinus communis]	Populus trichocarpa clone WS0128_O03 unknown mRNA
Maple_Unigene_BMK.23812	0.00748516	-2.5007	down	--	--	--	--	--	Ring finger protein, putative GN=RCOM_0337900 OS=Ricinus communis (Castor bean) PE=4 SV=1	gi|255587015|ref|XP_002534099.1| ring finger protein, putative [Ricinus communis]	--
Maple_Unigene_BMK.17398	0.000253911	-2.50043	down	--	--	Molecular Function: binding (GO:0005488);; Biological Process: regulation of transcription, DNA-dependent (GO:0006355);;	--	sp|Q9FM03|DOF56_ARATH Dof zinc finger protein DOF5.6 OS=Arabidopsis thaliana GN=DOF5.6 PE=2 SV=2	F-box family protein GN=POPTRDRAFT_575167 OS=Populus trichocarpa (Western balsam poplar) PE=4 SV=1	gi|224133542|ref|XP_002321600.1| f-box family protein [Populus trichocarpa]	Populus trichocarpa f-box family protein, mRNA
Maple_Unigene_BMK.21746	0.000253911	-2.50043	down	--	--	--	--	--	--	--	Acer pycnanthum voucher MBK:IOS10029 atpB-rbcL intergenic spacer, partial sequence; chloroplast
Maple_Unigene_BMK.26353	1.32e-07	-2.49529	down	--	--	Cellular Component: intracellular membrane-bounded organelle (GO:0043231);; Cellular Component: cytoplasmic part (GO:0044444);;	--	--	Putative uncharacterized protein GN=VIT_19s0014g02770 OS=Vitis vinifera (Grape) PE=4 SV=1	gi|224126567|ref|XP_002329586.1| predicted protein [Populus trichocarpa]	--
Maple_Unigene_BMK.25644	0.000888079	-2.49349	down	[K]	Transcription	Molecular Function: DNA binding (GO:0003677);; Molecular Function: DNA-directed RNA polymerase activity (GO:0003899);; Biological Process: transcription, DNA-dependent (GO:0006351);; Cellular Component: chloroplast (GO:0009507);;	K03046|1e-170|vvi:4025098|DNA-directed RNA polymerase subunit beta' [EC:2.7.7.6]	sp|Q8S8Y0|RPOC1_ATRBE DNA-directed RNA polymerase subunit beta&apos; OS=Atropa belladonna GN=rpoC1 PE=3 SV=2	DNA-directed RNA polymerase GN=rpoC1 OS=Berberidopsis corallina PE=3 SV=1	gi|225280|prf||1211235Q rpoC-like ORF 548	Berberidopsis corallina voucher FLAS:M.J. Moore 326 RNA polymerase beta' subunit protein (rpoC1) gene, complete cds; chloroplast
Maple_Unigene_BMK.28744	2.67e-08	-2.49212	down	--	--	Biological Process: selenium compound metabolic process (GO:0001887);; Cellular Component: cytosol (GO:0005829);; Biological Process: biosynthetic process (GO:0009058);; Molecular Function: pyridoxal phosphate binding (GO:0030170);; Molecular Function: methionine S-methyltransferase activity (GO:0030732);; Biological Process: methylation (GO:0032259);; Biological Process: S-adenosylmethionine met…	--	sp|Q9LTB2|MMT1_ARATH Methionine S-methyltransferase OS=Arabidopsis thaliana GN=MMT1 PE=2 SV=1	Methionine S-methyltransferase, putative GN=RCOM_0825000 OS=Ricinus communis (Castor bean) PE=4 SV=1	gi|255569806|ref|XP_002525867.1| Methionine S-methyltransferase, putative [Ricinus communis]	PREDICTED: Vitis vinifera hypothetical protein LOC100264437 (LOC100264437), mRNA
Maple_Unigene_BMK.19299	2.92e-09	-2.48287	down	--	--	Cellular Component: mitochondrion (GO:0005739);; Cellular Component: chloroplast thylakoid membrane (GO:0009535);; Biological Process: response to blue light (GO:0009637);; Biological Process: photosynthesis, light harvesting (GO:0009765);; Cellular Component: chloroplast envelope (GO:0009941);; Biological Process: response to red light (GO:0010114);; Biological Process: response to far red light…	K08912|1e-179|rcu:RCOM_1344080|light-harvesting complex II chlorophyll a/b binding protein 1	sp|P07369|CB2G_SOLLC Chlorophyll a-b binding protein 3C, chloroplastic OS=Solanum lycopersicum GN=CAB3C PE=3 SV=1	Chlorophyll A/B binding protein, putative GN=RCOM_1344080 OS=Ricinus communis (Castor bean) PE=4 SV=1	gi|255548299|ref|XP_002515206.1| chlorophyll A/B binding protein, putative [Ricinus communis]	Vitis vinifera, whole genome shotgun sequence, contig VV78X216174.26, clone ENTAV 115
Maple_Unigene_BMK.19603	0.000114728	-2.48063	down	--	--	Cellular Component: mitochondrion (GO:0005739);; Cellular Component: plant-type cell wall (GO:0009505);; Biological Process: gibberellic acid mediated signaling pathway (GO:0009740);; Biological Process: seed dormancy process (GO:0010162);; Biological Process: chlorophyll biosynthetic process (GO:0015995);; Cellular Component: cytoplasmic membrane-bounded vesicle (GO:0016023);; Biological Process…	--	--	Putative uncharacterized protein GN=RCOM_0965260 OS=Ricinus communis (Castor bean) PE=4 SV=1	gi|255553512|ref|XP_002517797.1| conserved hypothetical protein [Ricinus communis]	Ricinus communis conserved hypothetical protein, mRNA
Maple_Unigene_BMK.15173	0.00215825	-2.46891	down	--	--	--	--	--	Putative uncharacterized protein OS=Zea mays (Maize) PE=4 SV=1	gi|195610860|gb|ACG27260.1| hypothetical protein [Zea mays]	--
Maple_Unigene_BMK.13343	0.000225562	-2.46283	down	--	--	Biological Process: amino acid transport (GO:0006865);; Cellular Component: chloroplast (GO:0009507);; Molecular Function: amino acid transmembrane transporter activity (GO:0015171);; Biological Process: amine transport (GO:0015837);; Cellular Component: integral to membrane (GO:0016021);; Molecular Function: hydrolase activity (GO:0016787);;	--	sp|P47082|AVT1_YEAST Vacuolar amino acid transporter 1 OS=Saccharomyces cerevisiae GN=AVT1 PE=1 SV=1	Amino acid transporter, putative GN=RCOM_1538610 OS=Ricinus communis (Castor bean) PE=4 SV=1	gi|255557208|ref|XP_002519635.1| amino acid transporter, putative [Ricinus communis]	PREDICTED: Vitis vinifera hypothetical protein LOC100260071 (LOC100260071), mRNA
Maple_Unigene_BMK.27119	0.000225562	-2.46283	down	--	--	--	--	--	--	--	Gonystylus bancanus chloroplast, partial genome
Maple_Unigene_BMK.26723	1.11e-05	-2.45782	down	[E]	Amino acid transport and metabolism	Molecular Function: transporter activity (GO:0005215);; Molecular Function: calcium ion binding (GO:0005509);; Cellular Component: plasma membrane (GO:0005886);; Biological Process: oligopeptide transport (GO:0006857);; Biological Process: response to nematode (GO:0009624);;	--	sp|Q8H157|PTR19_ARATH Nitrate transporter 1.2 OS=Arabidopsis thaliana GN=NRT1.2 PE=1 SV=1	Putative uncharacterized protein GN=VIT_01s0026g01570 OS=Vitis vinifera (Grape) PE=4 SV=1	gi|224100445|ref|XP_002311879.1| predicted protein [Populus trichocarpa]	Populus trichocarpa predicted protein, mRNA
Maple_Unigene_BMK.30054	8.97e-07	-2.45779	down	--	--	Biological Process: response to molecule of bacterial origin (GO:0002237);; Biological Process: respiratory burst involved in defense response (GO:0002679);; Cellular Component: intracellular (GO:0005622);; Cellular Component: plasma membrane (GO:0005886);; Biological Process: response to oxidative stress (GO:0006979);; Biological Process: response to wounding (GO:0009611);; Biological Process: r…	--	--	Putative uncharacterized protein GN=VIT_09s0002g04620 OS=Vitis vinifera (Grape) PE=4 SV=1	gi|255550060|ref|XP_002516081.1| conserved hypothetical protein [Ricinus communis]	--
Maple_Unigene_BMK.18236	7.88e-07	-2.45494	down	--	--	--	--	sp|P40631|MLH_TETTH Micronuclear linker histone polyprotein OS=Tetrahymena thermophila GN=MLH PE=1 SV=2	Predicted protein GN=POPTRDRAFT_754257 OS=Populus trichocarpa (Western balsam poplar) PE=4 SV=1	gi|224066321|ref|XP_002302082.1| predicted protein [Populus trichocarpa]	Ricinus communis hypothetical protein, mRNA
Maple_Unigene_BMK.25508	2.65e-08	-2.44505	down	[P]	Inorganic ion transport and metabolism	Biological Process: MAPK cascade (GO:0000165);; Biological Process: response to molecule of bacterial origin (GO:0002237);; Biological Process: regulation of response to biotic stimulus (GO:0002831);; Cellular Component: intracellular (GO:0005622);; Cellular Component: plasma membrane (GO:0005886);; Biological Process: protein targeting to membrane (GO:0006612);; Biological Process: anion transpo…	--	sp|Q9M6N7|AMT2_ARATH Ammonium transporter 2 OS=Arabidopsis thaliana GN=AMT2 PE=1 SV=2	Ammonium transporter GN=PtrAMT2-1 OS=Populus trichocarpa (Western balsam poplar) PE=4 SV=1	gi|224091028|ref|XP_002309151.1| ammonium transporter [Populus trichocarpa]	Lotus japonicus putative ammonium transporter AMT2 mRNA, complete cds
Maple_Unigene_BMK.24961	2.36e-09	-2.43829	down	--	--	Molecular Function: nucleotide binding (GO:0000166);; Cellular Component: soluble fraction (GO:0005625);; Cellular Component: cytosol (GO:0005829);; Cellular Component: plasma membrane (GO:0005886);; Molecular Function: dTDP-4-dehydrorhamnose 3,5-epimerase activity (GO:0008830);; Molecular Function: dTDP-4-dehydrorhamnose reductase activity (GO:0008831);; Cellular Component: plasmodesma (GO:00095…	K12451|1e-107|vvi:100254814|3,5-epimerase/4-reductase [EC:5.1.3.- 1.1.1.-]	sp|Q9SYM5|RHM1_ARATH Probable rhamnose biosynthetic enzyme 1 OS=Arabidopsis thaliana GN=RHM1 PE=1 SV=1	UDP-L-rhamnose synthase OS=Gossypium hirsutum (Upland cotton) PE=2 SV=1	gi|211906440|gb|ACJ11713.1| UDP-L-rhamnose synthase [Gossypium hirsutum]	Populus trichocarpa predicted protein, mRNA
Maple_Unigene_BMK.22247	0.00572659	-2.43704	down	--	--	Biological Process: immune system process (GO:0002376);; Molecular Function: ubiquitin-protein ligase activity (GO:0004842);; Cellular Component: cytosol (GO:0005829);; Cellular Component: ribosome (GO:0005840);; Biological Process: amino acid transport (GO:0006865);; Biological Process: defense response (GO:0006952);; Biological Process: signal transduction (GO:0007165);; Biological Process: mul…	--	sp|Q9SLC3|ATL41_ARATH E3 ubiquitin-protein ligase ATL41 OS=Arabidopsis thaliana GN=ATL41 PE=1 SV=1	Ring finger protein, putative GN=RCOM_0554190 OS=Ricinus communis (Castor bean) PE=4 SV=1	gi|255568331|ref|XP_002525140.1| ring finger protein, putative [Ricinus communis]	PREDICTED: Vitis vinifera hypothetical protein LOC100248798 (LOC100248798), mRNA
Maple_Unigene_BMK.36664	2.1e-08	-2.43684	down	[J]	Translation, ribosomal structure and biogenesis	Cellular Component: nucleus (GO:0005634);; Biological Process: reciprocal meiotic recombination (GO:0007131);; Cellular Component: plastid (GO:0009536);; Biological Process: cytokinin biosynthetic process (GO:0009691);; Molecular Function: AMP dimethylallyltransferase activity (GO:0009824);; Molecular Function: ATP dimethylallyltransferase activity (GO:0052622);; Molecular Function: ADP dimethyla…	K10760|1e-143|pop:POPTR_246143|adenylate isopentenyltransferase (cytokinin synthase)	sp|Q93WC9|IPT3_ARATH Adenylate isopentenyltransferase 3, chloroplastic OS=Arabidopsis thaliana GN=IPT3 PE=1 SV=1	Cytokinin biosynthetic isopentenyltransferase (Fragment) GN=POPTRDRAFT_246143 OS=Populus trichocarpa (Western balsam poplar) PE=3 SV=1	gi|224131344|ref|XP_002321061.1| cytokinin biosynthetic isopentenyltransferase [Populus trichocarpa]	Arabidopsis lyrata subsp. lyrata ATIPT3, mRNA
Maple_Unigene_BMK.26329	1.58e-08	-2.4333	down	--	--	Molecular Function: protein binding (GO:0005515);; Cellular Component: endoplasmic reticulum (GO:0005783);; Cellular Component: cytosol (GO:0005829);; Biological Process: ER to Golgi vesicle-mediated transport (GO:0006888);; Molecular Function: oxysterol binding (GO:0008142);; Biological Process: steroid metabolic process (GO:0008202);; Biological Process: double fertilization forming a zygote an…	--	sp|Q9SR33|ORP3B_ARATH Oxysterol-binding protein-related protein 3B OS=Arabidopsis thaliana GN=ORP3B PE=2 SV=1	Oxysterol-binding family protein GN=ARALYDRAFT_478245 OS=Arabidopsis lyrata subsp. lyrata (Lyre-leaved rock-cress) PE=3 SV=1	gi|297829460|ref|XP_002882612.1| oxysterol-binding family protein [Arabidopsis lyrata subsp. lyrata]	Populus trichocarpa predicted protein, mRNA
Maple_Unigene_BMK.35289	2.2e-09	-2.4328	down	[S]	Function unknown	Molecular Function: nucleotide binding (GO:0000166);; Biological Process: response to molecule of bacterial origin (GO:0002237);; Molecular Function: protein kinase activity (GO:0004672);; Cellular Component: plasma membrane (GO:0005886);; Biological Process: signal transduction (GO:0007165);; Cellular Component: plant-type cell wall (GO:0009505);; Cellular Component: plasmodesma (GO:0009506);; B…	--	sp|C0LGK4|Y2165_ARATH Probable LRR receptor-like serine/threonine-protein kinase At2g16250 OS=Arabidopsis thaliana GN=At2g16250 PE=1 SV=1	Lrr receptor protein kinase, putative GN=RCOM_1594390 OS=Ricinus communis (Castor bean) PE=4 SV=1	gi|255538650|ref|XP_002510390.1| lrr receptor protein kinase, putative [Ricinus communis]	Ricinus communis lrr receptor protein kinase, putative, mRNA
Maple_Unigene_BMK.11995	2.5e-07	-2.43207	down	--	--	Molecular Function: peroxidase activity (GO:0004601);; Biological Process: iron ion transport (GO:0006826);; Biological Process: response to oxidative stress (GO:0006979);; Cellular Component: plant-type cell wall (GO:0009505);; Biological Process: cellular response to iron ion starvation (GO:0010106);; Biological Process: response to nitrate (GO:0010167);; Biological Process: regulation of anion…	--	sp|Q43735|PER27_ARATH Peroxidase 27 OS=Arabidopsis thaliana GN=PER27 PE=1 SV=1	Putative uncharacterized protein GN=VIT_12s0059g02410 OS=Vitis vinifera (Grape) PE=3 SV=1	gi|297739304|emb|CBI28955.3| unnamed protein product [Vitis vinifera]	Vitis vinifera, whole genome shotgun sequence, contig VV78X020520.5, clone ENTAV 115
Maple_Unigene_BMK.20501	2.29e-06	-2.4316	down	--	--	Cellular Component: intracellular (GO:0005622);; Biological Process: protein targeting to membrane (GO:0006612);; Biological Process: response to wounding (GO:0009611);; Biological Process: response to mechanical stimulus (GO:0009612);; Biological Process: ethylene biosynthetic process (GO:0009693);; Biological Process: plant-type cell wall modification (GO:0009827);; Biological Process: pollen t…	--	--	Putative uncharacterized protein GN=VIT_02s0025g00330 OS=Vitis vinifera (Grape) PE=4 SV=1	gi|225426158|ref|XP_002278707.1| PREDICTED: hypothetical protein [Vitis vinifera]	Ricinus communis conserved hypothetical protein, mRNA
Maple_Unigene_BMK.13468	0.0030912	-2.42835	down	--	--	Cellular Component: extracellular region (GO:0005576);; Biological Process: syncytium formation (GO:0006949);; Cellular Component: plant-type cell wall (GO:0009505);; Biological Process: plant-type cell wall organization (GO:0009664);; Cellular Component: membrane (GO:0016020);;	--	sp|O48818|EXPA4_ARATH Expansin-A4 OS=Arabidopsis thaliana GN=EXPA4 PE=1 SV=1	Alpha-expansin 4, putative GN=RCOM_0001490 OS=Ricinus communis (Castor bean) PE=4 SV=1	gi|255584879|ref|XP_002533155.1| Alpha-expansin 4 precursor, putative [Ricinus communis]	Ricinus communis Alpha-expansin 4 precursor, putative, mRNA
Maple_Unigene_BMK.28406	2.33e-09	-2.42347	down	--	--	Cellular Component: plasma membrane (GO:0005886);; Biological Process: response to stress (GO:0006950);; Biological Process: response to fungus (GO:0009620);; Cellular Component: anchored to membrane (GO:0031225);;	--	sp|Q07488|BCB1_ARATH Blue copper protein OS=Arabidopsis thaliana GN=BCB PE=1 SV=2	Predicted protein GN=POPTRDRAFT_1107304 OS=Populus trichocarpa (Western balsam poplar) PE=4 SV=1	gi|224144188|ref|XP_002325213.1| predicted protein [Populus trichocarpa]	--
Maple_Unigene_BMK.32397	0.00175227	-2.42147	down	--	--	Molecular Function: transferase activity (GO:0016740);;	--	sp|Q9LYN8|EXS_ARATH Leucine-rich repeat receptor protein kinase EXS OS=Arabidopsis thaliana GN=EXS PE=1 SV=1	Serine-threonine protein kinase, plant-type, putative GN=RCOM_0155180 OS=Ricinus communis (Castor bean) PE=3 SV=1	gi|255578886|ref|XP_002530297.1| serine-threonine protein kinase, plant-type, putative [Ricinus communis]	--
Maple_Unigene_BMK.29350	2.49e-09	-2.4164	down	[E]	Amino acid transport and metabolism	Biological Process: oligopeptide transport (GO:0006857);; Biological Process: response to stress (GO:0006950);; Biological Process: response to nematode (GO:0009624);; Biological Process: response to hormone stimulus (GO:0009725);; Molecular Function: oligopeptide transporter activity (GO:0015198);; Cellular Component: membrane (GO:0016020);; Biological Process: response to amino acid stimulus (G…	--	sp|Q8VZR7|PTR30_ARATH Probable peptide/nitrate transporter At2g40460 OS=Arabidopsis thaliana GN=At2g40460 PE=2 SV=2	Oligopeptide transporter, putative GN=RCOM_0688830 OS=Ricinus communis (Castor bean) PE=4 SV=1	gi|255559629|ref|XP_002520834.1| oligopeptide transporter, putative [Ricinus communis]	Ricinus communis oligopeptide transporter, putative, mRNA
Maple_Unigene_BMK.36341	2.33e-09	-2.41326	down	[RTKL]	--	Biological Process: MAPK cascade (GO:0000165);; Biological Process: activation of MAPKK activity (GO:0000186);; Molecular Function: MAP kinase kinase kinase activity (GO:0004709);; Molecular Function: ATP binding (GO:0005524);; Cellular Component: plasma membrane (GO:0005886);; Molecular Function: 2-alkenal reductase [NAD(P)] activity (GO:0032440);; Biological Process: oxidation-reduction process…	--	sp|C0LGG8|Y5343_ARATH Probable LRR receptor-like serine/threonine-protein kinase At1g53430 OS=Arabidopsis thaliana GN=At1g53430 PE=1 SV=1	Putative uncharacterized protein GN=VIT_19s0014g00830 OS=Vitis vinifera (Grape) PE=4 SV=1	gi|302142859|emb|CBI20154.3| unnamed protein product [Vitis vinifera]	Populus trichocarpa predicted protein, mRNA
Maple_Unigene_BMK.23732	0.000406004	-2.40741	down	--	--	Cellular Component: photosystem I (GO:0009522);; Cellular Component: chloroplast thylakoid membrane (GO:0009535);; Biological Process: photosynthesis (GO:0015979);; Cellular Component: integral to membrane (GO:0016021);;	--	sp|Q2L913|YCF4_GOSHI Photosystem I assembly protein ycf4 OS=Gossypium hirsutum GN=ycf4 PE=3 SV=1	Photosystem I assembly protein Ycf4 GN=ycf4 OS=Liquidambar styraciflua (Amberboom) PE=3 SV=1	gi|290488802|gb|ADD30785.1| photosystem I assembly protein ycf4 [Liquidambar styraciflua]	Citrus sinensis chloroplast, complete genome
Maple_Unigene_BMK.20416	0.000266414	-2.40411	down	[E]	Amino acid transport and metabolism	Molecular Function: transporter activity (GO:0005215);; Biological Process: oligopeptide transport (GO:0006857);; Cellular Component: membrane (GO:0016020);;	--	sp|Q9SX20|PTR18_ARATH Probable nitrite transporter At1g68570 OS=Arabidopsis thaliana GN=At1g68570 PE=2 SV=1	Nitrate transporter, putative GN=RCOM_1631200 OS=Ricinus communis (Castor bean) PE=4 SV=1	gi|255552447|ref|XP_002517267.1| nitrate transporter, putative [Ricinus communis]	Ricinus communis nitrate transporter, putative, mRNA
Maple_Unigene_BMK.30309	1.15e-07	-2.40325	down	[I]	Lipid transport and metabolism	Molecular Function: hydroxymethylglutaryl-CoA reductase (NADPH) activity (GO:0004420);; Cellular Component: endoplasmic reticulum (GO:0005783);; Biological Process: isoprenoid biosynthetic process (GO:0008299);; Biological Process: coenzyme A metabolic process (GO:0015936);; Cellular Component: integral to membrane (GO:0016021);; Biological Process: sterol biosynthetic process (GO:0016126);; Mole…	K00021|0.0|rcu:RCOM_1602200|hydroxymethylglutaryl-CoA reductase (NADPH) [EC:1.1.1.34]	sp|P29057|HMDH1_HEVBR 3-hydroxy-3-methylglutaryl-coenzyme A reductase 1 OS=Hevea brasiliensis GN=HMGR1 PE=2 SV=1	3-hydroxy-3-methylglutaryl coenzyme A reductase 1 GN=HMG1 OS=Litchi chinensis (Lychee) PE=2 SV=2	gi|255539334|ref|XP_002510732.1| hmg-CoA reductase, putative [Ricinus communis]	Populus trichocarpa predicted protein, mRNA
Maple_Unigene_BMK.28695	6.39e-09	-2.39549	down	[T]	Signal transduction mechanisms	Cellular Component: cytosol (GO:0005829);; Biological Process: protein dephosphorylation (GO:0006470);; Biological Process: transport (GO:0006810);; Biological Process: response to salt stress (GO:0009651);; Biological Process: post-embryonic development (GO:0009791);; Biological Process: response to UV-B (GO:0010224);; Biological Process: response to UV-C (GO:0010225);; Molecular Function: MAP k…	--	sp|Q9PW71|DUS4_CHICK Dual specificity protein phosphatase 4 OS=Gallus gallus GN=DUSP4 PE=2 SV=1	Putative uncharacterized protein GN=VIT_01s0137g00600 OS=Vitis vinifera (Grape) PE=4 SV=1	gi|225424627|ref|XP_002285484.1| PREDICTED: hypothetical protein [Vitis vinifera]	Vitis vinifera, whole genome shotgun sequence, contig VV78X020120.4, clone ENTAV 115
Maple_Unigene_BMK.27938	1.39e-08	-2.3944	down	--	--	--	--	--	--	--	Lotus japonicus cDNA, clone: LjFL1-035-AD12, HTC
Maple_Unigene_BMK.27515	4.61e-08	-2.39284	down	[RTKL]	--	Molecular Function: protein serine/threonine kinase activity (GO:0004674);; Molecular Function: ATP binding (GO:0005524);; Cellular Component: plasma membrane (GO:0005886);; Cellular Component: plasmodesma (GO:0009506);; Biological Process: brassinosteroid mediated signaling pathway (GO:0009742);; Biological Process: post-embryonic development (GO:0009791);; Biological Process: protein autophosph…	--	sp|Q9LK35|THE1_ARATH Receptor-like protein kinase THESEUS 1 OS=Arabidopsis thaliana GN=THE1 PE=1 SV=1	Predicted protein GN=POPTRDRAFT_568958 OS=Populus trichocarpa (Western balsam poplar) PE=3 SV=1	gi|224115046|ref|XP_002316926.1| predicted protein [Populus trichocarpa]	Dimocarpus longan THESEUS1 mRNA, partial cds
Maple_Unigene_BMK.19991	0.00838091	-2.38984	down	[O]	Posttranslational modification, protein turnover, chaperones	Molecular Function: serine-type endopeptidase activity (GO:0004252);; Cellular Component: extracellular region (GO:0005576);; Cellular Component: cell wall (GO:0005618);; Biological Process: proteolysis (GO:0006508);; Biological Process: response to auxin stimulus (GO:0009733);; Biological Process: lateral root morphogenesis (GO:0010102);; Cellular Component: cytoplasmic membrane-bounded vesicle …	--	sp|O65351|SUBL_ARATH Subtilisin-like protease OS=Arabidopsis thaliana GN=ARA12 PE=1 SV=1	Predicted protein GN=POPTRDRAFT_573140 OS=Populus trichocarpa (Western balsam poplar) PE=4 SV=1	gi|224129258|ref|XP_002320540.1| predicted protein [Populus trichocarpa]	Populus trichocarpa predicted protein, mRNA
Maple_Unigene_BMK.20616	3.97e-07	-2.38237	down	--	--	--	--	sp|Q9SUP6|WRK53_ARATH Probable WRKY transcription factor 53 OS=Arabidopsis thaliana GN=WRKY53 PE=1 SV=1	Predicted protein GN=POPTRDRAFT_834779 OS=Populus trichocarpa (Western balsam poplar) PE=4 SV=1	gi|224130498|ref|XP_002320852.1| predicted protein [Populus trichocarpa]	Populus trichocarpa predicted protein, mRNA
Maple_Unigene_BMK.36253	4.13e-09	-2.38197	down	--	--	Cellular Component: chloroplast (GO:0009507);;	--	--	Predicted protein GN=POPTRDRAFT_580121 OS=Populus trichocarpa (Western balsam poplar) PE=4 SV=1	gi|224126567|ref|XP_002329586.1| predicted protein [Populus trichocarpa]	Vitis vinifera, whole genome shotgun sequence, contig VV78X217256.5, clone ENTAV 115
Maple_Unigene_BMK.26740	0.000112904	-2.37492	down	--	--	Biological Process: metabolic process (GO:0008152);; Molecular Function: peptidase activity (GO:0008233);; Biological Process: response to stimulus (GO:0050896);;	K01365|1e-106|pop:POPTR_555684|cathepsin L [EC:3.4.22.15]	sp|O23791|BROM1_ANACO Fruit bromelain OS=Ananas comosus PE=1 SV=1	Predicted protein GN=POPTRDRAFT_555684 OS=Populus trichocarpa (Western balsam poplar) PE=3 SV=1	gi|224076970|ref|XP_002305073.1| predicted protein [Populus trichocarpa]	Populus trichocarpa predicted protein, mRNA
Maple_Unigene_BMK.36430	5.89e-05	-2.37358	down	--	--	Molecular Function: catalytic activity (GO:0003824);;	--	--	Receptor-like protein kinase GN=MTR_6g051800 OS=Medicago truncatula (Barrel medic) PE=4 SV=1	gi|255543959|ref|XP_002513042.1| serine-threonine protein kinase, plant-type, putative [Ricinus communis]	--
Maple_Unigene_BMK.33665	4.37e-05	-2.37301	down	[H]	Coenzyme transport and metabolism	Molecular Function: enzyme activator activity (GO:0008047);; Molecular Function: quinolinate synthetase A activity (GO:0008987);; Biological Process: aerobic respiration (GO:0009060);; Biological Process: NAD biosynthetic process (GO:0009435);; Cellular Component: chloroplast (GO:0009507);; Biological Process: iron-sulfur cluster assembly (GO:0016226);; Biological Process: quinolinate biosyntheti…	K03517|0.0|pop:POPTR_776169|quinolinate synthase [EC:2.5.1.72]	sp|Q97ZC4|NADA_SULSO Quinolinate synthase A OS=Sulfolobus solfataricus GN=nadA PE=3 SV=1	Predicted protein GN=POPTRDRAFT_776169 OS=Populus trichocarpa (Western balsam poplar) PE=4 SV=1	gi|224135969|ref|XP_002322206.1| predicted protein [Populus trichocarpa]	Populus trichocarpa predicted protein, mRNA
Maple_Unigene_BMK.35788	6.47e-09	-2.36981	down	[I]	Lipid transport and metabolism	Biological Process: metabolic process (GO:0008152);; Molecular Function: hydrolase activity (GO:0016787);; Biological Process: root hair cell differentiation (GO:0048765);;	--	sp|Q9SX78|CXE2_ARATH Probable carboxylesterase 2 OS=Arabidopsis thaliana GN=CXE2 PE=2 SV=1	Predicted protein GN=POPTRDRAFT_591916 OS=Populus trichocarpa (Western balsam poplar) PE=4 SV=1	gi|224137430|ref|XP_002327124.1| predicted protein [Populus trichocarpa]	Ricinus communis catalytic, putative, mRNA
Maple_Unigene_BMK.35048	8.71e-09	-2.36694	down	--	--	Molecular Function: magnesium ion binding (GO:0000287);; Molecular Function: electron carrier activity (GO:0009055);; Cellular Component: photosystem I (GO:0009522);; Cellular Component: chloroplast thylakoid membrane (GO:0009535);; Biological Process: photosynthesis (GO:0015979);; Cellular Component: integral to membrane (GO:0016021);; Molecular Function: chlorophyll binding (GO:0016168);; Molec…	K02690|0.0|vvi:4025090|photosystem I P700 chlorophyll a apoprotein A2	sp|A6MMK6|PSAB_DIOEL Photosystem I P700 chlorophyll a apoprotein A2 OS=Dioscorea elephantipes GN=psaB PE=3 SV=1	Photosystem I P700 chlorophyll a apoprotein A2 GN=psaB OS=Corynocarpus laevigatus (Karaka tree) PE=3 SV=1	gi|317046172|ref|YP_004072461.1| PSI P700 apoprotein A2 [Corynocarpus laevigata]	Citrus sinensis chloroplast, complete genome
Maple_Unigene_BMK.32654	2.79e-07	-2.36637	down	[G]	Carbohydrate transport and metabolism	Biological Process: selenium compound metabolic process (GO:0001887);; Cellular Component: cytosol (GO:0005829);; Biological Process: biosynthetic process (GO:0009058);; Molecular Function: pyridoxal phosphate binding (GO:0030170);; Molecular Function: methionine S-methyltransferase activity (GO:0030732);; Biological Process: methylation (GO:0032259);; Biological Process: S-adenosylmethionine met…	--	sp|Q9LTB2|MMT1_ARATH Methionine S-methyltransferase OS=Arabidopsis thaliana GN=MMT1 PE=2 SV=1	Methionine s-methyltransferase GN=MMT OS=Populus trichocarpa (Western balsam poplar) PE=4 SV=1	gi|224129814|ref|XP_002328809.1| methionine s-methyltransferase [Populus trichocarpa]	Ricinus communis Methionine S-methyltransferase, putative, mRNA
Maple_Unigene_BMK.29618	5.64e-08	-2.36074	down	--	--	Cellular Component: intracellular (GO:0005622);; Biological Process: protein targeting to membrane (GO:0006612);; Biological Process: anion transport (GO:0006820);; Biological Process: oligopeptide transport (GO:0006857);; Biological Process: nucleotide transport (GO:0006862);; Biological Process: ER to Golgi vesicle-mediated transport (GO:0006888);; Biological Process: cellular membrane fusion (…	--	sp|Q9SUA4|OPT5_ARATH Oligopeptide transporter 5 OS=Arabidopsis thaliana GN=OPT5 PE=2 SV=1	Oligopeptide transporter OPT family GN=POPTRDRAFT_753301 OS=Populus trichocarpa (Western balsam poplar) PE=4 SV=1	gi|224056485|ref|XP_002298879.1| oligopeptide transporter OPT family [Populus trichocarpa]	Vitis vinifera contig VV78X177495.5, whole genome shotgun sequence
Maple_Unigene_BMK.30181	0.000102931	-2.35347	down	[R]	General function prediction only	Molecular Function: triglyceride lipase activity (GO:0004806);; Biological Process: lipid catabolic process (GO:0016042);; Molecular Function: retinyl-palmitate esterase activity (GO:0050253);;	--	sp|Q67ZU1|LIP2_ARATH Triacylglycerol lipase 2 OS=Arabidopsis thaliana GN=LIP2 PE=2 SV=1	Predicted protein GN=POPTRDRAFT_899740 OS=Populus trichocarpa (Western balsam poplar) PE=4 SV=1	gi|224129070|ref|XP_002320493.1| predicted protein [Populus trichocarpa]	Populus trichocarpa predicted protein, mRNA
Maple_Unigene_BMK.20159	0.000309433	-2.35157	down	--	--	Biological Process: MAPK cascade (GO:0000165);; Biological Process: response to hypoxia (GO:0001666);; Biological Process: response to molecule of bacterial origin (GO:0002237);; Molecular Function: sequence-specific DNA binding transcription factor activity (GO:0003700);; Molecular Function: calmodulin binding (GO:0005516);; Cellular Component: nucleus (GO:0005634);; Biological Process: regulati…	--	--	Predicted protein GN=POPTRDRAFT_823284 OS=Populus trichocarpa (Western balsam poplar) PE=4 SV=1	gi|224121274|ref|XP_002318542.1| predicted protein [Populus trichocarpa]	Populus trichocarpa predicted protein, mRNA
Maple_Unigene_BMK.14109	0.00118528	-2.34865	down	--	--	Molecular Function: serine-type endopeptidase activity (GO:0004252);; Biological Process: proteolysis (GO:0006508);; Cellular Component: plant-type cell wall (GO:0009505);; Cellular Component: cytoplasmic membrane-bounded vesicle (GO:0016023);; Molecular Function: identical protein binding (GO:0042802);; Biological Process: negative regulation of catalytic activity (GO:0043086);; Cellular Compone…	--	sp|O65351|SUBL_ARATH Subtilisin-like protease OS=Arabidopsis thaliana GN=ARA12 PE=1 SV=1	Xylem serine proteinase 1, putative GN=RCOM_0396690 OS=Ricinus communis (Castor bean) PE=4 SV=1	gi|255584904|ref|XP_002533167.1| Xylem serine proteinase 1 precursor, putative [Ricinus communis]	Brassica rapa subsp. pekinensis chromosome Cytogenetic chromosome 1 clone KBrH097M21, complete sequence
Maple_Unigene_BMK.29875	0.00198669	-2.3473	down	--	--	Molecular Function: nucleotide binding (GO:0000166);; Molecular Function: protein serine/threonine kinase activity (GO:0004674);; Cellular Component: plasma membrane (GO:0005886);; Biological Process: N-terminal protein myristoylation (GO:0006499);; Biological Process: amino acid transport (GO:0006865);; Cellular Component: plasmodesma (GO:0009506);; Biological Process: endoplasmic reticulum unfo…	--	sp|Q10KY3|CAMK1_ORYSJ Calcium/calmodulin-dependent serine/threonine-protein kinase 1 OS=Oryza sativa subsp. japonica GN=CAMK1 PE=1 SV=1	Calcium-dependent protein kinase, putative GN=RCOM_1370990 OS=Ricinus communis (Castor bean) PE=4 SV=1	gi|255549160|ref|XP_002515635.1| calcium-dependent protein kinase, putative [Ricinus communis]	Populus trichocarpa CPK related kinase 4 (CRK4), mRNA
Maple_Unigene_BMK.12325	0.00347118	-2.34567	down	--	--	Biological Process: lipid transport (GO:0006869);;	--	--	Putative uncharacterized protein GN=VIT_02s0236g00020 OS=Vitis vinifera (Grape) PE=4 SV=1	gi|224126435|ref|XP_002329553.1| predicted protein [Populus trichocarpa]	--
Maple_Unigene_BMK.30332	3.81e-08	-2.33663	down	[C]	Energy production and conversion	Cellular Component: peroxisome (GO:0005777);; Biological Process: response to wounding (GO:0009611);; Biological Process: response to fungus (GO:0009620);; Biological Process: jasmonic acid biosynthetic process (GO:0009695);; Molecular Function: FMN binding (GO:0010181);; Biological Process: response to ozone (GO:0010193);; Molecular Function: 12-oxophytodienoate reductase activity (GO:0016629);;…	--	sp|Q9FEW9|OPR3_SOLLC 12-oxophytodienoate reductase 3 OS=Solanum lycopersicum GN=OPR3 PE=1 SV=1	12-oxophytodienoate reductase opr, putative GN=RCOM_0712140 OS=Ricinus communis (Castor bean) PE=4 SV=1	gi|255550473|ref|XP_002516287.1| 12-oxophytodienoate reductase opr, putative [Ricinus communis]	Hevea brasiliensis 12-oxophytodienoate reductase (opr) mRNA, complete cds
Maple_Unigene_BMK.32538	4.4e-08	-2.32513	down	[Q]	Secondary metabolites biosynthesis, transport and catabolism	Molecular Function: copper ion binding (GO:0005507);; Molecular Function: L-ascorbate oxidase activity (GO:0008447);; Biological Process: lignin catabolic process (GO:0046274);; Cellular Component: apoplast (GO:0048046);; Molecular Function: hydroquinone:oxygen oxidoreductase activity (GO:0052716);; Biological Process: oxidation-reduction process (GO:0055114);;	--	sp|Q941X2|LAC3_ORYSJ Laccase-3 OS=Oryza sativa subsp. japonica GN=LAC3 PE=2 SV=1	Laccase, putative GN=RCOM_0647160 OS=Ricinus communis (Castor bean) PE=4 SV=1	gi|255567618|ref|XP_002524788.1| laccase, putative [Ricinus communis]	Ricinus communis laccase, putative, mRNA
Maple_Unigene_BMK.26433	2.45e-08	-2.32347	down	[U]	Intracellular trafficking, secretion, and vesicular transport	Molecular Function: endopeptidase activity (GO:0004175);; Biological Process: signal peptide processing (GO:0006465);; Biological Process: proteolysis (GO:0006508);; Molecular Function: serine-type peptidase activity (GO:0008236);; Cellular Component: chloroplast thylakoid (GO:0009534);; Cellular Component: integral to membrane (GO:0016021);;	K03100|1e-160|vvi:100243802|signal peptidase I [EC:3.4.21.89]	sp|Q9M9Z2|TPP2_ARATH Probable thylakoidal processing peptidase 2, chloroplastic OS=Arabidopsis thaliana GN=TPP2 PE=2 SV=1	Putative uncharacterized protein GN=VITISV_021649 OS=Vitis vinifera (Grape) PE=3 SV=1	gi|225458489|ref|XP_002284120.1| PREDICTED: hypothetical protein [Vitis vinifera]	PREDICTED: Vitis vinifera hypothetical protein LOC100243802 (LOC100243802), mRNA
Maple_Unigene_BMK.27645	4.59e-07	-2.32079	down	[S]	Function unknown	Cellular Component: membrane (GO:0016020);; Biological Process: response to stimulus (GO:0050896);;	--	sp|Q9C9H7|RLP12_ARATH Receptor-like protein 12 OS=Arabidopsis thaliana GN=RLP12 PE=2 SV=1	Putative uncharacterized protein GN=VITISV_022039 OS=Vitis vinifera (Grape) PE=4 SV=1	gi|147804670|emb|CAN66864.1| hypothetical protein VITISV_022039 [Vitis vinifera]	--
Maple_Unigene_BMK.20047	1.45e-06	-2.31664	down	--	--	Molecular Function: ferric-chelate reductase activity (GO:0000293);; Molecular Function: binding (GO:0005488);; Cellular Component: plasma membrane (GO:0005886);; Biological Process: response to light stimulus (GO:0009416);; Cellular Component: chloroplast (GO:0009507);; Biological Process: photosynthetic electron transport chain (GO:0009767);;	--	sp|Q9ES45|DUOX2_RAT Dual oxidase 2 OS=Rattus norvegicus GN=Duox2 PE=2 SV=1	Putative uncharacterized protein GN=VIT_12s0035g02150 OS=Vitis vinifera (Grape) PE=4 SV=1	gi|297739426|emb|CBI29608.3| unnamed protein product [Vitis vinifera]	Vitis vinifera contig VV78X113361.11, whole genome shotgun sequence
Maple_Unigene_BMK.30372	6.02e-07	-2.31238	down	--	--	Molecular Function: hydrolase activity, hydrolyzing O-glycosyl compounds (GO:0004553);; Biological Process: carbohydrate metabolic process (GO:0005975);; Molecular Function: carbohydrate binding (GO:0030246);;	--	sp|Q42059|GUN6_ARATH Endoglucanase 6 OS=Arabidopsis thaliana GN=At1g64390 PE=2 SV=2	Endo-beta-1,4-glucanase GN=eg4 OS=Prunus persica (Peach) PE=2 SV=1	gi|90017357|emb|CAI68020.1| endo-beta-1,4-glucanase [Prunus persica]	Dimocarpus longan endo-1,4-beta-glucanase (EG1) mRNA, complete cds
Maple_Unigene_BMK.32282	4.49e-08	-2.31222	down	[G]	Carbohydrate transport and metabolism	Molecular Function: beta-N-acetylhexosaminidase activity (GO:0004563);; Cellular Component: vacuole (GO:0005773);; Cellular Component: cytosol (GO:0005829);; Cellular Component: plasma membrane (GO:0005886);; Biological Process: carbohydrate metabolic process (GO:0005975);; Cellular Component: plant-type cell wall (GO:0009505);; Cellular Component: cytoplasmic membrane-bounded vesicle (GO:0016023…	K12373|0.0|rcu:RCOM_1076600|hexosaminidase [EC:3.2.1.52]	sp|Q54K55|HEXB1_DICDI Beta-hexosaminidase subunit B1 OS=Dictyostelium discoideum GN=hexb1 PE=3 SV=1	Beta-hexosaminidase, putative GN=RCOM_1076600 OS=Ricinus communis (Castor bean) PE=4 SV=1	gi|255547424|ref|XP_002514769.1| beta-hexosaminidase, putative [Ricinus communis]	Ricinus communis beta-hexosaminidase, putative, mRNA
Maple_Unigene_BMK.22720	0.000240881	-2.30788	down	--	--	Biological Process: pattern specification process (GO:0007389);; Biological Process: regulation of cell size (GO:0008361);; Cellular Component: plant-type cell wall (GO:0009505);; Biological Process: plant-type cell wall organization (GO:0009664);; Biological Process: plant-type cell wall biogenesis (GO:0009832);; Biological Process: auxin polar transport (GO:0009926);; Biological Process: root m…	--	sp|Q9LZX4|FLA10_ARATH Fasciclin-like arabinogalactan protein 10 OS=Arabidopsis thaliana GN=FLA10 PE=1 SV=1	Predicted protein GN=POPTRDRAFT_730906 OS=Populus trichocarpa (Western balsam poplar) PE=4 SV=1	gi|224130034|ref|XP_002320736.1| predicted protein [Populus trichocarpa]	Lotus japonicus cDNA, clone: LjFL1-022-CE01, HTC
Maple_Unigene_BMK.36495	2.36e-08	-2.2963	down	[C]	Energy production and conversion	Biological Process: polysaccharide catabolic process (GO:0000272);; Molecular Function: protein kinase activity (GO:0004672);; Biological Process: starch metabolic process (GO:0005982);; Biological Process: glycerol metabolic process (GO:0006071);; Biological Process: lipid metabolic process (GO:0006629);; Biological Process: cell adhesion (GO:0007155);; Molecular Function: glycerophosphodiester …	--	sp|Q9FJ62|GLPQ1_ARATH Probable glycerophosphoryl diester phosphodiesterase 1 OS=Arabidopsis thaliana GN=GPDL1 PE=1 SV=1	Glycerophosphoryl diester phosphodiesterase, putative GN=RCOM_0046160 OS=Ricinus communis (Castor bean) PE=4 SV=1	gi|255576268|ref|XP_002529027.1| glycerophosphoryl diester phosphodiesterase, putative [Ricinus communis]	Ricinus communis glycerophosphoryl diester phosphodiesterase, putative, mRNA
Maple_Unigene_BMK.27747	3.65e-06	-2.29093	down	--	--	Cellular Component: chloroplast inner membrane (GO:0009706);; Molecular Function: hydrogen ion transmembrane transporter activity (GO:0015078);; Biological Process: proton transport (GO:0015992);; Cellular Component: integral to membrane (GO:0016021);;	--	sp|Q2L922|CEMA_GOSHI Chloroplast envelope membrane protein OS=Gossypium hirsutum GN=cemA PE=3 SV=1	envelope membrane protein, chloroplastic GN=cemA OS=Theobroma cacao (Cacao) PE=3 SV=1	gi|313199714|ref|YP_004021328.1| chloroplast envelope membrane protein [Theobroma cacao]	Citrus sinensis chloroplast, complete genome
Maple_Unigene_BMK.24206	6.6e-07	-2.28497	down	--	--	Biological Process: MAPK cascade (GO:0000165);; Biological Process: respiratory burst involved in defense response (GO:0002679);; Biological Process: regulation of response to biotic stimulus (GO:0002831);; Molecular Function: sequence-specific DNA binding transcription factor activity (GO:0003700);; Molecular Function: protein binding (GO:0005515);; Cellular Component: nucleus (GO:0005634);; Bio…	K13424|5e-49|rcu:RCOM_0849600|WRKY transcription factor 33	sp|Q8S8P5|WRK33_ARATH Probable WRKY transcription factor 33 OS=Arabidopsis thaliana GN=WRKY33 PE=1 SV=2	WRKY transcription factor 17 (Fragment) OS=Dimocarpus longan PE=2 SV=1	gi|255571505|ref|XP_002526700.1| transcription factor, putative [Ricinus communis]	Ricinus communis transcription factor, putative, mRNA
Maple_Unigene_BMK.14617	0.00220995	-2.28317	down	--	--	Molecular Function: lysozyme activity (GO:0003796);; Biological Process: carbohydrate metabolic process (GO:0005975);; Cellular Component: cytoplasmic membrane-bounded vesicle (GO:0016023);; Molecular Function: cation binding (GO:0043169);;	--	sp|P23472|CHLY_HEVBR Hevamine-A OS=Hevea brasiliensis PE=1 SV=2	Putative uncharacterized protein GN=VIT_15s0046g01710 OS=Vitis vinifera (Grape) PE=3 SV=1	gi|225454383|ref|XP_002279147.1| PREDICTED: hypothetical protein [Vitis vinifera]	Dimocarpus longan class III chitinase mRNA, partial cds
Maple_Unigene_BMK.35569	0.00220995	-2.28317	down	[RTKL]	--	--	--	sp|Q8VZG8|Y4885_ARATH Probable LRR receptor-like serine/threonine-protein kinase At4g08850 OS=Arabidopsis thaliana GN=At4g08850 PE=1 SV=3	Putative uncharacterized protein GN=VITISV_033633 OS=Vitis vinifera (Grape) PE=4 SV=1	gi|147834735|emb|CAN59749.1| hypothetical protein VITISV_033633 [Vitis vinifera]	Lotus japonicus genomic DNA, clone: LjT44E18, TM1828, complete sequence
Maple_Unigene_BMK.24223	1.13e-07	-2.28314	down	[GEPR]	--	Molecular Function: sugar:hydrogen symporter activity (GO:0005351);; Cellular Component: vacuolar membrane (GO:0005774);; Biological Process: carbohydrate transport (GO:0008643);; Cellular Component: chloroplast (GO:0009507);; Cellular Component: integral to membrane (GO:0016021);; Molecular Function: 2-alkenal reductase [NAD(P)] activity (GO:0032440);; Biological Process: transmembrane transport…	--	sp|Q8LBI9|EDL16_ARATH Sugar transporter ERD6-like 16 OS=Arabidopsis thaliana GN=At5g18840 PE=2 SV=2	Putative uncharacterized protein GN=VIT_05s0020g02170 OS=Vitis vinifera (Grape) PE=3 SV=1	gi|225432432|ref|XP_002278197.1| PREDICTED: hypothetical protein [Vitis vinifera]	Populus trichocarpa predicted protein, mRNA
Maple_Unigene_BMK.28576	9.22e-08	-2.28179	down	--	--	Cellular Component: chloroplast (GO:0009507);; Biological Process: photosynthesis, light harvesting (GO:0009765);; Cellular Component: membrane (GO:0016020);;	K08912|2e-41|vvi:100250504|light-harvesting complex II chlorophyll a/b binding protein 1	sp|P12333|CB2A_SPIOL Chlorophyll a-b binding protein, chloroplastic OS=Spinacia oleracea PE=1 SV=1	Putative chloroplast chlorophyll a/b-binding protein GN=ABC OS=Carya cathayensis PE=2 SV=1	gi|94404555|gb|ABF17940.1| putative chloroplast chlorophyll a/b-binding protein [Carya cathayensis]	Fagus sylvatica putative chlorophyll a/b-binding protein mRNA, partial cds
Maple_Unigene_BMK.29413	3.02e-08	-2.28178	down	[M]	Cell wall/membrane/envelope biogenesis	Molecular Function: nucleotide binding (GO:0000166);; Cellular Component: soluble fraction (GO:0005625);; Cellular Component: cytosol (GO:0005829);; Molecular Function: dTDP-glucose 4,6-dehydratase activity (GO:0008460);; Molecular Function: dTDP-4-dehydrorhamnose reductase activity (GO:0008831);; Cellular Component: plasmodesma (GO:0009506);; Biological Process: response to sucrose stimulus (GO:…	K12450|0.0|vvi:100260586|UDP-glucose 4,6-dehydratase [EC:4.2.1.76]	sp|Q9SYM5|RHM1_ARATH Probable rhamnose biosynthetic enzyme 1 OS=Arabidopsis thaliana GN=RHM1 PE=1 SV=1	Putative uncharacterized protein GN=VIT_19s0014g00290 OS=Vitis vinifera (Grape) PE=4 SV=1	gi|225461808|ref|XP_002285634.1| PREDICTED: hypothetical protein [Vitis vinifera]	Gossypium hirsutum clone RHM1 rhamnose synthase mRNA, complete cds
Maple_Unigene_BMK.29949	1.5e-05	-2.28129	down	[J]	Translation, ribosomal structure and biogenesis	Molecular Function: DNA binding (GO:0003677);; Molecular Function: DNA-directed RNA polymerase activity (GO:0003899);; Biological Process: transcription, DNA-dependent (GO:0006351);; Cellular Component: chloroplast (GO:0009507);; Molecular Function: protein dimerization activity (GO:0046983);;	K03040|1e-112|vvi:4025131|DNA-directed RNA polymerase subunit alpha [EC:2.7.7.6]	sp|Q2VEE8|RPOA_SOLTU DNA-directed RNA polymerase subunit alpha OS=Solanum tuberosum GN=rpoA PE=3 SV=1	30S ribosomal protein S11 GN=MTR_4g034800 OS=Medicago truncatula (Barrel medic) PE=3 SV=1	gi|313199734|ref|YP_004021348.1| RNA polymerase alpha subunit [Theobroma cacao]	Citrus sinensis chloroplast, complete genome
Maple_Unigene_BMK.27155	0.00046137	-2.27962	down	--	--	Molecular Function: voltage-gated potassium channel activity (GO:0005249);; Molecular Function: calmodulin binding (GO:0005516);; Biological Process: potassium ion transport (GO:0006813);; Cellular Component: integral to membrane (GO:0016021);; Molecular Function: cyclic nucleotide binding (GO:0030551);; Biological Process: transmembrane transport (GO:0055085);;	--	sp|Q9SL29|CNG15_ARATH Putative cyclic nucleotide-gated ion channel 15 OS=Arabidopsis thaliana GN=CNGC15 PE=2 SV=1	Putative uncharacterized protein GN=VIT_06s0004g02670 OS=Vitis vinifera (Grape) PE=4 SV=1	gi|297746274|emb|CBI16330.3| unnamed protein product [Vitis vinifera]	Ricinus communis Cyclic nucleotide-gated ion channel, putative, mRNA
Maple_Unigene_BMK.31490	2.92e-05	-2.27175	down	--	--	Cellular Component: mitochondrion (GO:0005739);; Cellular Component: Golgi apparatus (GO:0005794);; Biological Process: protein glycosylation (GO:0006486);; Cellular Component: integral to membrane (GO:0016021);; Molecular Function: galactosylxylosylprotein 3-beta-galactosyltransferase activity (GO:0047220);; Molecular Function: beta-1,3-galactosyltransferase activity (GO:0048531);;	--	sp|Q6NQB7|B3GT7_ARATH Beta-1,3-galactosyltransferase 7 OS=Arabidopsis thaliana GN=B3GALT7 PE=2 SV=1	Avr9 elicitor response protein GN=MTR_3g073370 OS=Medicago truncatula (Barrel medic) PE=4 SV=1	gi|217071894|gb|ACJ84307.1| unknown [Medicago truncatula]	TSA: Cajanus cajan cultivar Asha contig05958.Asha mRNA sequence
Maple_Unigene_BMK.36055	0.000273818	-2.26741	down	--	--	Biological Process: respiratory burst involved in defense response (GO:0002679);; Molecular Function: protein serine/threonine kinase activity (GO:0004674);; Molecular Function: ATP binding (GO:0005524);; Cellular Component: plasma membrane (GO:0005886);; Biological Process: protein phosphorylation (GO:0006468);; Biological Process: protein targeting to membrane (GO:0006612);; Biological Process:…	--	sp|P47735|RLK5_ARATH Receptor-like protein kinase 5 OS=Arabidopsis thaliana GN=RLK5 PE=1 SV=1	Predicted protein (Fragment) GN=POPTRDRAFT_262103 OS=Populus trichocarpa (Western balsam poplar) PE=3 SV=1	gi|224142219|ref|XP_002324456.1| predicted protein [Populus trichocarpa]	Populus trichocarpa predicted protein, mRNA
Maple_Unigene_BMK.24124	3.9e-07	-2.26039	down	--	--	Molecular Function: aspartic-type endopeptidase activity (GO:0004190);; Biological Process: proteolysis (GO:0006508);; Cellular Component: plant-type cell wall (GO:0009505);;	--	sp|Q766C2|NEP2_NEPGR Aspartic proteinase nepenthesin-2 OS=Nepenthes gracilis GN=nep2 PE=1 SV=1	Predicted protein GN=POPTRDRAFT_757017 OS=Populus trichocarpa (Western balsam poplar) PE=3 SV=1	gi|224074147|ref|XP_002304273.1| predicted protein [Populus trichocarpa]	Populus trichocarpa predicted protein, mRNA
Maple_Unigene_BMK.30360	0.00179455	-2.25877	down	--	--	Molecular Function: protein kinase activity (GO:0004672);; Biological Process: metabolic process (GO:0008152);; Biological Process: response to bacterium (GO:0009617);; Biological Process: response to organic substance (GO:0010033);; Biological Process: cellular response to stress (GO:0033554);; Biological Process: innate immune response (GO:0045087);;	--	sp|Q8H199|CRK14_ARATH Cysteine-rich receptor-like protein kinase 14 OS=Arabidopsis thaliana GN=CRK14 PE=2 SV=2	Predicted protein GN=POPTRDRAFT_771112 OS=Populus trichocarpa (Western balsam poplar) PE=3 SV=1	gi|224113951|ref|XP_002316624.1| predicted protein [Populus trichocarpa]	Vitis vinifera contig VV78X220857.5, whole genome shotgun sequence
Maple_Unigene_BMK.7528	5.1e-08	-2.25227	down	--	--	Molecular Function: nucleotide binding (GO:0000166);; Molecular Function: nuclease activity (GO:0004518);; Molecular Function: transporter activity (GO:0005215);; Cellular Component: intracellular (GO:0005622);; Biological Process: DNA repair (GO:0006281);; Biological Process: transport (GO:0006810);; Molecular Function: zinc ion binding (GO:0008270);; Biological Process: cyclic nucleotide biosyn…	--	sp|Q552X2|MED26_DICDI Putative mediator of RNA polymerase II transcription subunit 26 OS=Dictyostelium discoideum GN=med26 PE=3 SV=2	Putative uncharacterized protein GN=VOLCADRAFT_117426 OS=Volvox carteri (Green alga) PE=4 SV=1	gi|189093976|ref|XP_444741.1| hypothetical protein CaO19.63 [Candida albicans SC5314]	--
Maple_Unigene_BMK.30501	2.65e-05	-2.25114	down	--	--	Cellular Component: plastid (GO:0009536);;	--	--	Putative uncharacterized protein OS=Medicago truncatula (Barrel medic) PE=4 SV=1	gi|29565662|ref|NP_817244.1| ORF45d [Pinus koraiensis]	Acer amoenum chloroplast tRNA-Leu gene (partial) for transfer RNA-Leu and trnL-trnF intergenic spacer, strain acc. 2
Maple_Unigene_BMK.32842	5.09e-07	-2.25101	down	[S]	Function unknown	Molecular Function: protein kinase activity (GO:0004672);; Biological Process: N-terminal protein myristoylation (GO:0006499);; Biological Process: systemic acquired resistance (GO:0009627);; Biological Process: salicylic acid biosynthetic process (GO:0009697);; Biological Process: salicylic acid mediated signaling pathway (GO:0009863);; Cellular Component: membrane (GO:0016020);; Biological Proc…	--	sp|Q9M0G7|PXL2_ARATH Leucine-rich repeat receptor-like protein kinase PXL2 OS=Arabidopsis thaliana GN=PXL2 PE=2 SV=1	Predicted protein GN=POPTRDRAFT_574291 OS=Populus trichocarpa (Western balsam poplar) PE=4 SV=1	gi|224145191|ref|XP_002325559.1| predicted protein [Populus trichocarpa]	Populus trichocarpa predicted protein, mRNA
Maple_Unigene_BMK.31901	0.000926996	-2.24673	down	--	--	--	--	--	Putative uncharacterized protein GN=RCOM_0851380 OS=Ricinus communis (Castor bean) PE=4 SV=1	gi|255552636|ref|XP_002517361.1| conserved hypothetical protein [Ricinus communis]	--
Maple_Unigene_BMK.17748	1.89e-07	-2.24626	down	[U]	Intracellular trafficking, secretion, and vesicular transport	Biological Process: MAPK cascade (GO:0000165);; Biological Process: respiratory burst involved in defense response (GO:0002679);; Biological Process: regulation of response to biotic stimulus (GO:0002831);; Molecular Function: SNAP receptor activity (GO:0005484);; Cellular Component: trans-Golgi network (GO:0005802);; Cellular Component: plasma membrane (GO:0005886);; Biological Process: regulati…	--	sp|Q9ZSD4|SY121_ARATH Syntaxin-121 OS=Arabidopsis thaliana GN=SYP121 PE=1 SV=1	Syntaxin, putative GN=RCOM_0420140 OS=Ricinus communis (Castor bean) PE=3 SV=1	gi|255566161|ref|XP_002524068.1| syntaxin, putative [Ricinus communis]	Ricinus communis syntaxin, putative, mRNA
Maple_Unigene_BMK.20760	0.00529547	-2.23788	down	[C]	Energy production and conversion	Molecular Function: ATP binding (GO:0005524);; Cellular Component: mitochondrion (GO:0005739);; Biological Process: ATP synthesis coupled proton transport (GO:0015986);; Cellular Component: proton-transporting ATP synthase complex, catalytic core F(1) (GO:0045261);; Molecular Function: hydrogen ion transporting ATP synthase activity, rotational mechanism (GO:0046933);; Molecular Function: proton-…	--	sp|P05493|ATPAM_PEA ATP synthase subunit alpha, mitochondrial OS=Pisum sativum GN=ATPA PE=3 SV=2	F1-ATPase alpha subunit (Fragment) GN=atpA OS=Gymnosiphon divaricatus PE=4 SV=1	gi|189017720|gb|ACD71529.1| F1-ATPase alpha subunit [Gymnosiphon divaricatus]	Cupaniopsis anacardioides Atp1 (atp1) gene, partial cds; mitochondrial
Maple_Unigene_BMK.26813	1.05e-07	-2.23636	down	[G]	Carbohydrate transport and metabolism	Biological Process: polysaccharide biosynthetic process (GO:0000271);; Biological Process: defense response, incompatible interaction (GO:0009814);; Biological Process: cell tip growth (GO:0009932);; Biological Process: regulation of hormone levels (GO:0010817);; Molecular Function: pectate lyase activity (GO:0030570);; Biological Process: cell wall modification involved in multidimensional cell …	K01728|0.0|rcu:RCOM_1010900|pectate lyase [EC:4.2.2.2]	sp|Q93Z04|PLY13_ARATH Probable pectate lyase 13 OS=Arabidopsis thaliana GN=PMR6 PE=1 SV=1	Pectate lyase, putative GN=RCOM_1010900 OS=Ricinus communis (Castor bean) PE=4 SV=1	gi|255586803|ref|XP_002534016.1| Pectate lyase precursor, putative [Ricinus communis]	Vitis vinifera cultivar Cabernet Sauvignon pectate lyase-like protein 1 mRNA, complete cds
Maple_Unigene_BMK.36013	3.84e-07	-2.2315	down	[S]	Function unknown	Biological Process: MAPK cascade (GO:0000165);; Molecular Function: protein serine/threonine kinase activity (GO:0004674);; Molecular Function: ATP binding (GO:0005524);; Cellular Component: intracellular (GO:0005622);; Cellular Component: plasma membrane (GO:0005886);; Biological Process: protein phosphorylation (GO:0006468);; Biological Process: oligopeptide transport (GO:0006857);; Biological …	--	sp|Q9LP24|Y1571_ARATH Probable leucine-rich repeat receptor-like protein kinase At1g35710 OS=Arabidopsis thaliana GN=At1g35710 PE=2 SV=1	Receptor protein kinase, putative GN=RCOM_1035000 OS=Ricinus communis (Castor bean) PE=4 SV=1	gi|225456161|ref|XP_002278590.1| PREDICTED: hypothetical protein [Vitis vinifera]	Ricinus communis receptor protein kinase, putative, mRNA
Maple_Unigene_BMK.35093	4.56e-06	-2.23131	down	--	--	--	--	sp|Q9C9H7|RLP12_ARATH Receptor-like protein 12 OS=Arabidopsis thaliana GN=RLP12 PE=2 SV=1	Predicted protein GN=POPTRDRAFT_577078 OS=Populus trichocarpa (Western balsam poplar) PE=4 SV=1	gi|224140517|ref|XP_002323629.1| predicted protein [Populus trichocarpa]	Vitis vinifera contig VV78X084942.9, whole genome shotgun sequence
Maple_Unigene_BMK.33135	2.42e-07	-2.23028	down	[H]	Coenzyme transport and metabolism	Molecular Function: uroporphyrin-III C-methyltransferase activity (GO:0004851);; Biological Process: threonine catabolic process (GO:0006567);; Cellular Component: chloroplast (GO:0009507);; Biological Process: siroheme biosynthetic process (GO:0019354);; Biological Process: methylation (GO:0032259);; Molecular Function: precorrin-2 dehydrogenase activity (GO:0043115);; Biological Process: oxidat…	--	sp|Q2Y6L7|CYSG_NITMU Siroheme synthase OS=Nitrosospira multiformis (strain ATCC 25196 / NCIMB 11849) GN=cysG PE=3 SV=2	Predicted protein GN=POPTRDRAFT_1116791 OS=Populus trichocarpa (Western balsam poplar) PE=3 SV=1	gi|224120852|ref|XP_002330842.1| predicted protein [Populus trichocarpa]	Populus trichocarpa predicted protein, mRNA
Maple_Unigene_BMK.28205	9.48e-05	-2.22615	down	[GEPR]	--	Molecular Function: sugar:hydrogen symporter activity (GO:0005351);; Molecular Function: galactose transmembrane transporter activity (GO:0005354);; Cellular Component: plasma membrane (GO:0005886);; Biological Process: galactose transport (GO:0015757);; Cellular Component: integral to membrane (GO:0016021);; Cellular Component: cytoplasmic membrane-bounded vesicle (GO:0016023);; Molecular Functi…	--	sp|Q8GW61|STP14_ARATH Sugar transport protein 14 OS=Arabidopsis thaliana GN=STP14 PE=2 SV=2	Sugar transporter, putative GN=RCOM_0911690 OS=Ricinus communis (Castor bean) PE=3 SV=1	gi|255552117|ref|XP_002517103.1| sugar transporter, putative [Ricinus communis]	Populus trichocarpa predicted protein, mRNA
Maple_Unigene_BMK.39922	3.78e-05	-2.22342	down	[Z]	Cytoskeleton	Molecular Function: GTPase activity (GO:0003924);; Molecular Function: structural molecule activity (GO:0005198);; Molecular Function: GTP binding (GO:0005525);; Cellular Component: cytoplasm (GO:0005737);; Cellular Component: microtubule (GO:0005874);; Biological Process: GTP catabolic process (GO:0006184);; Biological Process: microtubule-based movement (GO:0007018);; Biological Process: protei…	K07374|1e-101|vvi:100247366|tubulin alpha	sp|Q9ZRR5|TBA3_HORVU Tubulin alpha-3 chain OS=Hordeum vulgare GN=TUBA3 PE=2 SV=1	Alpha-tubulin (Fragment) GN=tua OS=Cucumis sativus (Cucumber) PE=2 SV=1	gi|297739393|emb|CBI29424.3| unnamed protein product [Vitis vinifera]	Camellia sinensis alpha tubulin 1 (Tua1) mRNA, complete cds
Maple_Unigene_BMK.23123	1.26e-07	-2.22071	down	--	--	Cellular Component: nucleus (GO:0005634);; Cellular Component: vacuole (GO:0005773);; Cellular Component: cytosol (GO:0005829);; Cellular Component: plasma membrane (GO:0005886);; Cellular Component: chloroplast (GO:0009507);; Biological Process: brassinosteroid mediated signaling pathway (GO:0009742);; Molecular Function: protein domain specific binding (GO:0019904);; Biological Process: respons…	K06630|5e-74|vvi:100267829|tyrosine 3-monooxygenase/tryptophan 5-monooxygenase activation protein	sp|P46266|1433_PEA 14-3-3-like protein OS=Pisum sativum PE=2 SV=1	Putative uncharacterized protein GN=VIT_18s0001g06330 OS=Vitis vinifera (Grape) PE=3 SV=1	gi|224063273|ref|XP_002301071.1| predicted protein [Populus trichocarpa]	Mangifera indica 14-3-3 mRNA, partial cds
Maple_Unigene_BMK.28785	0.00122181	-2.21929	down	[RTKL]	--	Molecular Function: protein serine/threonine kinase activity (GO:0004674);; Molecular Function: non-membrane spanning protein tyrosine kinase activity (GO:0004715);; Molecular Function: ATP binding (GO:0005524);; Cellular Component: vacuole (GO:0005773);; Cellular Component: plasma membrane (GO:0005886);; Biological Process: protein phosphorylation (GO:0006468);; Biological Process: response to a…	--	sp|Q9T0J1|CRK26_ARATH Cysteine-rich receptor-like protein kinase 26 OS=Arabidopsis thaliana GN=CRK26 PE=2 SV=1	Putative uncharacterized protein (Fragment) GN=VIT_00s2485g00010 OS=Vitis vinifera (Grape) PE=4 SV=1	gi|296083559|emb|CBI23554.3| unnamed protein product [Vitis vinifera]	Populus trichocarpa predicted protein, mRNA
Maple_Unigene_BMK.23408	1.15e-07	-2.2156	down	[G]	Carbohydrate transport and metabolism	Molecular Function: hydrolase activity, hydrolyzing O-glycosyl compounds (GO:0004553);; Cellular Component: cell wall (GO:0005618);; Biological Process: cellular glucan metabolic process (GO:0006073);; Biological Process: phloem or xylem histogenesis (GO:0010087);; Biological Process: fruit development (GO:0010154);; Molecular Function: xyloglucan:xyloglucosyl transferase activity (GO:0016762);; …	K08235|1e-144|pop:POPTR_720800|xyloglucan:xyloglucosyl transferase [EC:2.4.1.207]	sp|Q8LDS2|XTH27_ARATH Probable xyloglucan endotransglucosylase/hydrolase protein 27 OS=Arabidopsis thaliana GN=XTH27 PE=2 SV=2	Xyloglucan endotransglycosylase/hydrolase XTH-39 OS=Populus tremula (European aspen) PE=2 SV=1	gi|124109193|gb|ABM91072.1| xyloglucan endotransglycosylase/hydrolase precursor XTH-39 [Populus tremula]	Populus trichocarpa predicted protein, mRNA
Maple_Unigene_BMK.38502	0.0041308	-2.21457	down	--	--	Cellular Component: Golgi apparatus (GO:0005794);; Biological Process: cellular cell wall organization (GO:0007047);; Molecular Function: zinc ion binding (GO:0008270);; Biological Process: primary cell wall biogenesis (GO:0009833);; Biological Process: seed coat development (GO:0010214);; Cellular Component: integral to membrane (GO:0016021);; Biological Process: cell growth (GO:0016049);; Molec…	K10999|2e-41|pop:POPTR_706420|cellulose synthase A [EC:2.4.1.12]	sp|Q84M43|CESA2_ORYSJ Probable cellulose synthase A catalytic subunit 2 [UDP-forming] OS=Oryza sativa subsp. japonica GN=CESA2 PE=2 SV=1	Cellulose synthase GN=POPTRDRAFT_706420 OS=Populus trichocarpa (Western balsam poplar) PE=4 SV=1	gi|224055195|ref|XP_002298432.1| cellulose synthase [Populus trichocarpa]	Ricinus communis Cellulose synthase A catalytic subunit 6 [UDP-forming], putative, mRNA
Maple_Unigene_BMK.28579	2.6e-07	-2.21342	down	--	--	Cellular Component: mitochondrion (GO:0005739);; Cellular Component: photosystem I (GO:0009522);; Cellular Component: photosystem II (GO:0009523);; Cellular Component: chloroplast thylakoid membrane (GO:0009535);; Biological Process: response to blue light (GO:0009637);; Biological Process: photosynthesis, light harvesting (GO:0009765);; Cellular Component: chloroplast envelope (GO:0009941);; Bio…	K08912|9e-75|vvi:100250504|light-harvesting complex II chlorophyll a/b binding protein 1	sp|P08222|CB22_CUCSA Chlorophyll a-b binding protein of LHCII type 1 (Fragment) OS=Cucumis sativus PE=2 SV=1	Chlorophyll a/b binding protein-like protein (Fragment) GN=TfCAB2 OS=Torenia fournieri PE=2 SV=1	gi|305377032|dbj|BAJ15879.1| chlorophyll a/b binding protein-like protein [Torenia fournieri]	Fagus sylvatica putative chlorophyll a/b-binding protein mRNA, partial cds
Maple_Unigene_BMK.17651	2.73e-05	-2.21202	down	[R]	General function prediction only	Molecular Function: nucleotide binding (GO:0000166);; Biological Process: mRNA splicing, via spliceosome (GO:0000398);; Molecular Function: RNA binding (GO:0003723);; Cellular Component: cytoplasm (GO:0005737);; Biological Process: plant-type hypersensitive response (GO:0009626);; Biological Process: positive regulation of salicylic acid mediated signaling pathway (GO:0080151);;	--	sp|A0JM51|CELF5_XENTR CUGBP Elav-like family member 5 OS=Xenopus tropicalis GN=celf5 PE=2 SV=1	RNA binding protein, putative GN=RCOM_0556860 OS=Ricinus communis (Castor bean) PE=4 SV=1	gi|255559360|ref|XP_002520700.1| RNA binding protein, putative [Ricinus communis]	Ricinus communis RNA binding protein, putative, mRNA
Maple_Unigene_BMK.24406	5.07e-06	-2.21155	down	[G]	Carbohydrate transport and metabolism	Cellular Component: protein storage vacuole (GO:0000326);; Cellular Component: plasma membrane (GO:0005886);; Biological Process: water transport (GO:0006833);; Cellular Component: plant-type cell wall (GO:0009505);; Cellular Component: plant-type vacuole membrane (GO:0009705);; Cellular Component: chloroplast envelope (GO:0009941);; Molecular Function: methylammonium transmembrane transporter ac…	--	sp|Q41951|TIP21_ARATH Aquaporin TIP2-1 OS=Arabidopsis thaliana GN=TIP2-1 PE=1 SV=2	Putative uncharacterized protein OS=Glycine max (Soybean) PE=2 SV=1	gi|255627519|gb|ACU14104.1| unknown [Glycine max]	Ricinus communis tonoplast intrinsic protein, putative, mRNA
Maple_Unigene_BMK.23174	0.000116396	-2.20909	down	--	--	Biological Process: carbohydrate metabolic process (GO:0005975);; Biological Process: catabolic process (GO:0009056);; Molecular Function: hydrolase activity, acting on glycosyl bonds (GO:0016798);; Biological Process: macromolecule metabolic process (GO:0043170);;	--	sp|O04138|CHI4_ORYSJ Chitinase 4 OS=Oryza sativa subsp. japonica GN=Cht4 PE=2 SV=2	Class IV chitinase OS=Corylus heterophylla PE=2 SV=1	gi|189014948|gb|ACD69683.1| chitinase [Mangifera indica]	Citrus sinensis chitinase CHI1 (chi1) mRNA, complete cds
Maple_Unigene_BMK.11880	0.00196413	-2.20798	down	--	--	Cellular Component: Golgi apparatus (GO:0005794);; Cellular Component: plant-type cell wall (GO:0009505);; Cellular Component: plasmodesma (GO:0009506);; Cellular Component: anchored to plasma membrane (GO:0046658);;	--	sp|Q9FFH6|FLA13_ARATH Fasciclin-like arabinogalactan protein 13 OS=Arabidopsis thaliana GN=FLA13 PE=1 SV=1	Putative uncharacterized protein GN=RCOM_1171550 OS=Ricinus communis (Castor bean) PE=4 SV=1	gi|255553599|ref|XP_002517840.1| conserved hypothetical protein [Ricinus communis]	--
Maple_Unigene_BMK.30449	0.000242366	-2.20493	down	--	--	--	--	--	Putative uncharacterized protein GN=VIT_00s0780g00030 OS=Vitis vinifera (Grape) PE=4 SV=1	gi|296090665|emb|CBI41065.3| unnamed protein product [Vitis vinifera]	--
Maple_Unigene_BMK.26984	4.97e-06	-2.20154	down	[RTKL]	--	Biological Process: MAPK cascade (GO:0000165);; Molecular Function: protein serine/threonine kinase activity (GO:0004674);; Molecular Function: non-membrane spanning protein tyrosine kinase activity (GO:0004715);; Molecular Function: ATP binding (GO:0005524);; Cellular Component: intracellular (GO:0005622);; Cellular Component: plasma membrane (GO:0005886);; Biological Process: regulation of tran…	--	sp|O80939|LRK41_ARATH L-type lectin-domain containing receptor kinase IV.1 OS=Arabidopsis thaliana GN=LECRK41 PE=1 SV=1	Predicted protein GN=POPTRDRAFT_762394 OS=Populus trichocarpa (Western balsam poplar) PE=3 SV=1	gi|224090779|ref|XP_002309078.1| predicted protein [Populus trichocarpa]	Populus trichocarpa clone POP015-B18, complete sequence
Maple_Unigene_BMK.26983	2.01e-06	-2.20099	down	[RTKL]	--	Biological Process: MAPK cascade (GO:0000165);; Molecular Function: protein serine/threonine kinase activity (GO:0004674);; Molecular Function: non-membrane spanning protein tyrosine kinase activity (GO:0004715);; Molecular Function: ATP binding (GO:0005524);; Cellular Component: plasma membrane (GO:0005886);; Biological Process: regulation of transcription, DNA-dependent (GO:0006355);; Biologica…	--	sp|O80939|LRK41_ARATH L-type lectin-domain containing receptor kinase IV.1 OS=Arabidopsis thaliana GN=LECRK41 PE=1 SV=1	Putative uncharacterized protein GN=VITISV_019444 OS=Vitis vinifera (Grape) PE=3 SV=1	gi|147808029|emb|CAN77672.1| hypothetical protein VITISV_019444 [Vitis vinifera]	Populus trichocarpa predicted protein, mRNA
Maple_Unigene_BMK.27957	1.16e-07	-2.19963	down	--	--	Molecular Function: carboxylesterase activity (GO:0004091);; Cellular Component: plant-type cell wall (GO:0009505);; Cellular Component: membrane (GO:0016020);; Cellular Component: cytoplasmic membrane-bounded vesicle (GO:0016023);;	--	sp|Q8R116|NOTUM_MOUSE Protein notum homolog OS=Mus musculus GN=Notum PE=2 SV=2	PAE OS=Litchi chinensis (Lychee) PE=2 SV=1	gi|192764525|gb|ACF05806.1| PAE [Litchi chinensis]	Litchi chinensis PAE mRNA, complete cds
Maple_Unigene_BMK.21430	0.0073468	-2.19947	down	--	--	Biological Process: defense response (GO:0006952);; Molecular Function: ADP binding (GO:0043531);;	--	--	Cc-nbs-lrr resistance protein GN=POPTRDRAFT_586349 OS=Populus trichocarpa (Western balsam poplar) PE=4 SV=1	gi|224115620|ref|XP_002332101.1| cc-nbs-lrr resistance protein [Populus trichocarpa]	--
Maple_Unigene_BMK.4781	2.49e-05	-2.19747	down	--	--	Cellular Component: vacuole (GO:0005773);; Molecular Function: high affinity copper ion transmembrane transporter activity (GO:0015089);; Biological Process: high-affinity copper ion transport (GO:0015678);; Cellular Component: integral to membrane (GO:0016021);; Cellular Component: anchored to plasma membrane (GO:0046658);; Biological Process: pollen sperm cell differentiation (GO:0048235);; Bio…	K14686|2e-56|pop:POPTR_558005|solute carrier family 31 (copper transporter), member 1	sp|Q39065|COPT1_ARATH Copper transporter 1 OS=Arabidopsis thaliana GN=COPT1 PE=2 SV=2	Copper transporter GN=POPTRDRAFT_558005 OS=Populus trichocarpa (Western balsam poplar) PE=4 SV=1	gi|224104365|ref|XP_002313412.1| copper transporter [Populus trichocarpa]	Populus trichocarpa copper transporter, mRNA
Maple_Unigene_BMK.10663	0.000343584	-2.19631	down	--	--	Cellular Component: nucleus (GO:0005634);; Cellular Component: cytosol (GO:0005829);; Cellular Component: plasma membrane (GO:0005886);; Biological Process: glycolysis (GO:0006096);; Biological Process: water transport (GO:0006833);; Biological Process: hyperosmotic response (GO:0006972);; Biological Process: Golgi organization (GO:0007030);; Molecular Function: carboxymethylenebutenolidase activ…	--	--	Endo-1,3-1,4-beta-d-glucanase, putative GN=RCOM_0678150 OS=Ricinus communis (Castor bean) PE=4 SV=1	gi|255551491|ref|XP_002516791.1| endo-1,3-1,4-beta-d-glucanase, putative [Ricinus communis]	TSA: Cajanus cajan cultivar Asha contig11777.Asha mRNA sequence
Maple_Unigene_BMK.6996	1.28e-07	-2.19609	down	--	--	Biological Process: polysaccharide biosynthetic process (GO:0000271);; Cellular Component: mitochondrion (GO:0005739);; Cellular Component: plasma membrane (GO:0005886);; Biological Process: water transport (GO:0006833);; Biological Process: pattern specification process (GO:0007389);; Biological Process: regulation of cell size (GO:0008361);; Biological Process: response to salt stress (GO:00096…	--	sp|Q6J163|5NG4_PINTA Auxin-induced protein 5NG4 OS=Pinus taeda PE=2 SV=1	JHL18I08.9 protein GN=JHL18I08.9 OS=Jatropha curcas PE=4 SV=1	gi|317106672|dbj|BAJ53175.1| JHL18I08.9 [Jatropha curcas]	Populus trichocarpa mtn21-like protein (N21L12), mRNA
Maple_Unigene_BMK.35791	1.78e-07	-2.19098	down	[RTKL]	--	Biological Process: respiratory burst involved in defense response (GO:0002679);; Molecular Function: protein serine/threonine kinase activity (GO:0004674);; Molecular Function: non-membrane spanning protein tyrosine kinase activity (GO:0004715);; Molecular Function: ATP binding (GO:0005524);; Biological Process: protein phosphorylation (GO:0006468);; Biological Process: iron ion transport (GO:00…	--	sp|C0LGG3|Y5182_ARATH Probable LRR receptor-like serine/threonine-protein kinase At1g51820 OS=Arabidopsis thaliana GN=At1g51820 PE=2 SV=1	Putative uncharacterized protein T14L22.6 GN=T14L22.6 OS=Arabidopsis thaliana (Mouse-ear cress) PE=3 SV=1	gi|225442387|ref|XP_002276837.1| PREDICTED: hypothetical protein, partial [Vitis vinifera]	PREDICTED: Vitis vinifera hypothetical protein LOC100266960 (LOC100266960), mRNA
Maple_Unigene_BMK.23146	0.000864405	-2.18872	down	--	--	Cellular Component: plasma membrane (GO:0005886);; Biological Process: anaerobic respiration (GO:0009061);; Biological Process: ethylene biosynthetic process (GO:0009693);; Biological Process: response to stimulus (GO:0050896);;	--	--	Putative uncharacterized protein GN=RCOM_0517320 OS=Ricinus communis (Castor bean) PE=4 SV=1	gi|255575719|ref|XP_002528759.1| conserved hypothetical protein [Ricinus communis]	TSA: Jatropha curcas Contig6384, mRNA sequence
Maple_Unigene_BMK.19869	6.45e-07	-2.18711	down	--	--	Molecular Function: hydrolase activity (GO:0016787);; Biological Process: response to other organism (GO:0051707);;	--	sp|Q7XA74|GDL21_ARATH GDSL esterase/lipase At1g54030 OS=Arabidopsis thaliana GN=At1g54030 PE=2 SV=1	Predicted protein GN=POPTRDRAFT_763780 OS=Populus trichocarpa (Western balsam poplar) PE=4 SV=1	gi|224095632|ref|XP_002310421.1| predicted protein [Populus trichocarpa]	--
Maple_Unigene_BMK.27154	0.000303446	-2.18505	down	--	--	Molecular Function: intracellular cyclic nucleotide activated cation channel activity (GO:0005221);; Molecular Function: inward rectifier potassium channel activity (GO:0005242);; Molecular Function: calmodulin binding (GO:0005516);; Biological Process: potassium ion transport (GO:0006813);; Biological Process: calcium ion transport (GO:0006816);; Biological Process: cellular calcium ion homeosta…	--	sp|Q9SL29|CNG15_ARATH Putative cyclic nucleotide-gated ion channel 15 OS=Arabidopsis thaliana GN=CNGC15 PE=2 SV=1	Putative uncharacterized protein GN=VIT_06s0004g02670 OS=Vitis vinifera (Grape) PE=4 SV=1	gi|297746274|emb|CBI16330.3| unnamed protein product [Vitis vinifera]	Ricinus communis Cyclic nucleotide-gated ion channel, putative, mRNA
Maple_Unigene_BMK.24555	7.13e-06	-2.17631	down	--	--	Molecular Function: chaperone binding (GO:0051087);;	--	--	Putative uncharacterized protein GN=VIT_10s0003g04270 OS=Vitis vinifera (Grape) PE=4 SV=1	gi|225443974|ref|XP_002280537.1| PREDICTED: hypothetical protein [Vitis vinifera]	Ricinus communis conserved hypothetical protein, mRNA
Maple_Unigene_BMK.33185	1.15e-05	-2.17231	down	--	--	Cellular Component: Golgi apparatus (GO:0005794);; Cellular Component: cytosol (GO:0005829);; Cellular Component: plant-type cell wall (GO:0009505);; Biological Process: response to brassinosteroid stimulus (GO:0009741);; Biological Process: sterol biosynthetic process (GO:0016126);;	--	--	Predicted protein GN=POPTRDRAFT_551592 OS=Populus trichocarpa (Western balsam poplar) PE=4 SV=1	gi|224063251|ref|XP_002301062.1| predicted protein [Populus trichocarpa]	Ricinus communis conserved hypothetical protein, mRNA
Maple_Unigene_BMK.27810	2.24e-06	-2.17142	down	--	--	Molecular Function: transmembrane signaling receptor activity (GO:0004888);; Molecular Function: extracellular ligand-gated ion channel activity (GO:0005230);; Biological Process: transport (GO:0006810);; Biological Process: cell surface receptor signaling pathway (GO:0007166);; Cellular Component: membrane (GO:0016020);; Cellular Component: cell part (GO:0044464);;	--	sp|Q8LGN0|GLR27_ARATH Glutamate receptor 2.7 OS=Arabidopsis thaliana GN=GLR2.7 PE=2 SV=3	Glutamate receptor GN=POPTRDRAFT_578647 OS=Populus trichocarpa (Western balsam poplar) PE=3 SV=1	gi|224142293|ref|XP_002324493.1| glutamate-gated kainate-type ion channel receptor subunit GluR5 [Populus trichocarpa]	Populus trichocarpa glutamate-gated kainate-type ion channel receptor subunit GluR5, mRNA
Maple_Unigene_BMK.14168	0.000632411	-2.16434	down	--	--	--	--	--	Predicted protein GN=POPTRDRAFT_558785 OS=Populus trichocarpa (Western balsam poplar) PE=4 SV=1	gi|224081487|ref|XP_002306431.1| predicted protein [Populus trichocarpa]	Ricinus communis conserved hypothetical protein, mRNA
Maple_Unigene_BMK.11807	0.0021262	-2.16278	down	--	--	Cellular Component: plastid (GO:0009536);;	--	--	Putative uncharacterized protein GN=RCOM_1618130 OS=Ricinus communis (Castor bean) PE=4 SV=1	gi|255541838|ref|XP_002511983.1| conserved hypothetical protein [Ricinus communis]	Populus trichocarpa predicted protein, mRNA
Maple_Unigene_BMK.15596	0.000144784	-2.15772	down	--	--	Cellular Component: intracellular (GO:0005622);; Cellular Component: plasma membrane (GO:0005886);; Biological Process: ER to Golgi vesicle-mediated transport (GO:0006888);; Cellular Component: plasmodesma (GO:0009506);; Biological Process: systemic acquired resistance (GO:0009627);; Cellular Component: integral to membrane (GO:0016021);; Biological Process: response to endoplasmic reticulum stre…	--	sp|Q6CGU8|MCH1_YARLI Probable transporter MCH1 OS=Yarrowia lipolytica GN=MCH1 PE=3 SV=1	Putative uncharacterized protein GN=VIT_13s0019g05070 OS=Vitis vinifera (Grape) PE=4 SV=1	gi|225448934|ref|XP_002272074.1| PREDICTED: hypothetical protein [Vitis vinifera]	Ricinus communis conserved hypothetical protein, mRNA
Maple_Unigene_BMK.34467	1.5e-05	-2.15321	down	--	--	Cellular Component: extracellular region (GO:0005576);; Cellular Component: Golgi apparatus (GO:0005794);; Cellular Component: cytosol (GO:0005829);; Cellular Component: plant-type cell wall (GO:0009505);; Cellular Component: plasmodesma (GO:0009506);; Biological Process: unidimensional cell growth (GO:0009826);; Biological Process: plant-type cell wall loosening (GO:0009828);; Cellular Component…	--	sp|Q9SVE5|EXLA2_ARATH Expansin-like A2 OS=Arabidopsis thaliana GN=EXLA2 PE=2 SV=1	Beta-expansin 1a, putative GN=RCOM_0235100 OS=Ricinus communis (Castor bean) PE=3 SV=1	gi|255587002|ref|XP_002534094.1| Beta-expansin 1a precursor, putative [Ricinus communis]	Quercus robur partial mRNA for expansin-like protein (ORF1)
Maple_Unigene_BMK.34784	1.2e-06	-2.15201	down	[OC]	--	Cellular Component: vacuolar membrane (GO:0005774);; Cellular Component: endoplasmic reticulum (GO:0005783);; Biological Process: protein folding (GO:0006457);; Biological Process: response to heat (GO:0009408);; Cellular Component: chloroplast (GO:0009507);; Biological Process: systemic acquired resistance (GO:0009627);; Biological Process: response to high light intensity (GO:0009644);; Biologi…	--	sp|Q8VX13|PDI13_ARATH Protein disulfide isomerase-like 1-3 OS=Arabidopsis thaliana GN=PDIL1-3 PE=2 SV=1	Putative uncharacterized protein OS=Populus trichocarpa (Western balsam poplar) PE=2 SV=1	gi|118487805|gb|ABK95726.1| unknown [Populus trichocarpa]	Litchi chinensis cultivar Maguili clone MG-AG-7 microsatellite sequence
Maple_Unigene_BMK.33069	3.63e-07	-2.14866	down	--	--	Biological Process: oligopeptide transport (GO:0006857);; Molecular Function: oligopeptide transporter activity (GO:0015198);; Cellular Component: membrane (GO:0016020);; Biological Process: transmembrane transport (GO:0055085);; Biological Process: response to karrikin (GO:0080167);;	--	sp|Q9FME8|OPT4_ARATH Oligopeptide transporter 4 OS=Arabidopsis thaliana GN=OPT4 PE=2 SV=1	Oligopeptide transporter, putative GN=RCOM_0818100 OS=Ricinus communis (Castor bean) PE=4 SV=1	gi|255554579|ref|XP_002518328.1| Oligopeptide transporter, putative [Ricinus communis]	Populus trichocarpa oligopeptide transporter OPT family, mRNA
Maple_Unigene_BMK.21728	0.00047643	-2.14445	down	--	--	Molecular Function: peroxidase activity (GO:0004601);; Molecular Function: iron ion binding (GO:0005506);; Molecular Function: calcium ion binding (GO:0005509);; Cellular Component: vacuole (GO:0005773);; Cellular Component: Golgi apparatus (GO:0005794);; Cellular Component: integral to plasma membrane (GO:0005887);; Biological Process: osmosensory signaling pathway (GO:0007231);; Molecular Funct…	--	sp|Q9FIJ0|RBOHD_ARATH Respiratory burst oxidase homolog protein D OS=Arabidopsis thaliana GN=RBOHD PE=1 SV=1	Predicted protein GN=POPTRDRAFT_712105 OS=Populus trichocarpa (Western balsam poplar) PE=4 SV=1	gi|224072447|ref|XP_002303736.1| predicted protein [Populus trichocarpa]	Ricinus communis respiratory burst oxidase, putative, mRNA
Maple_Unigene_BMK.23845	3.29e-05	-2.13929	down	[E]	Amino acid transport and metabolism	Biological Process: oligopeptide transport (GO:0006857);; Biological Process: response to nematode (GO:0009624);; Molecular Function: amino acid transmembrane transporter activity (GO:0015171);; Biological Process: amine transport (GO:0015837);; Cellular Component: membrane (GO:0016020);; Cellular Component: cytoplasmic membrane-bounded vesicle (GO:0016023);;	--	sp|Q9SRI2|PTR31_ARATH Putative peptide/nitrate transporter At3g01350 OS=Arabidopsis thaliana GN=At3g01350 PE=2 SV=1	Predicted protein GN=POPTRDRAFT_585877 OS=Populus trichocarpa (Western balsam poplar) PE=4 SV=1	gi|224116474|ref|XP_002331906.1| predicted protein [Populus trichocarpa]	Populus trichocarpa predicted protein, mRNA
Maple_Unigene_BMK.16543	0.000265408	-2.13876	down	--	--	--	--	--	Putative uncharacterized protein GN=RCOM_0532160 OS=Ricinus communis (Castor bean) PE=4 SV=1	gi|255572046|ref|XP_002526964.1| conserved hypothetical protein [Ricinus communis]	Ricinus communis conserved hypothetical protein, mRNA
Maple_Unigene_BMK.14394	4.71e-07	-2.13303	down	--	--	Cellular Component: cell wall (GO:0005618);; Biological Process: cellular cell wall organization (GO:0007047);; Molecular Function: glycogenin glucosyltransferase activity (GO:0008466);; Cellular Component: cell junction (GO:0030054);; Biological Process: cellulose biosynthetic process (GO:0030244);;	K13379|0.0|rcu:RCOM_1468610|reversibly glycosylated polypeptide/UDP-arabinopyranose mutase [EC:2.4.1.- 5.4.99.-]	sp|O04300|UPTG_PEA Alpha-1,4-glucan-protein synthase [UDP-forming] OS=Pisum sativum GN=UPTG PE=1 SV=1	GRP-like protein 2 GN=GRPL2 OS=Gossypium hirsutum (Upland cotton) PE=2 SV=1	gi|110559491|gb|ABG76000.1| GRP-like protein 2 [Gossypium hirsutum]	Populus trichocarpa predicted protein, mRNA
Maple_Unigene_BMK.32970	4.02e-05	-2.13264	down	[RTKL]	--	Molecular Function: protein serine/threonine kinase activity (GO:0004674);; Molecular Function: ATP binding (GO:0005524);; Cellular Component: mitochondrion (GO:0005739);; Biological Process: protein phosphorylation (GO:0006468);; Cellular Component: cytoplasmic membrane-bounded vesicle (GO:0016023);;	--	sp|Q3ECH2|Y1670_ARATH Probable receptor-like protein kinase At1g67000 OS=Arabidopsis thaliana GN=At1g67000 PE=2 SV=2	Putative uncharacterized protein GN=VIT_01s0011g04290 OS=Vitis vinifera (Grape) PE=3 SV=1	gi|224108395|ref|XP_002314832.1| predicted protein [Populus trichocarpa]	Carica papaya putative serine/threonine receptor protein kinase STK5-like gene, partial sequence
Maple_Unigene_BMK.17782	8.21e-07	-2.13041	down	[RTKL]	--	Molecular Function: protein kinase C activity (GO:0004697);; Molecular Function: protein tyrosine kinase activity (GO:0004713);; Molecular Function: ATP binding (GO:0005524);; Cellular Component: nucleus (GO:0005634);; Cellular Component: cytosol (GO:0005829);; Cellular Component: plasma membrane (GO:0005886);; Biological Process: protein phosphorylation (GO:0006468);; Cellular Component: phragmo…	--	sp|Q2LZZ7|TRC_DROPS Serine/threonine-protein kinase tricorner OS=Drosophila pseudoobscura pseudoobscura GN=trc PE=3 SV=1	Predicted protein GN=POPTRDRAFT_816476 OS=Populus trichocarpa (Western balsam poplar) PE=4 SV=1	gi|224063515|ref|XP_002301182.1| predicted protein [Populus trichocarpa]	Lotus japonicus cDNA, clone: LjFL2-027-DA05, HTC
Maple_Unigene_BMK.26781	0.00596024	-2.12774	down	[C]	Energy production and conversion	Molecular Function: NADH dehydrogenase (ubiquinone) activity (GO:0008137);; Cellular Component: chloroplast thylakoid membrane (GO:0009535);; Cellular Component: integral to membrane (GO:0016021);; Biological Process: ATP synthesis coupled electron transport (GO:0042773);; Molecular Function: quinone binding (GO:0048038);;	K05575|1e-116|vvi:4025039|NADH dehydrogenase I subunit 4 [EC:1.6.5.3]	sp|Q09MC6|NU4C_CITSI NAD(P)H-quinone oxidoreductase chain 4, chloroplastic OS=Citrus sinensis GN=ndhD PE=3 SV=1	NAD(P)H-quinone oxidoreductase chain 4, chloroplastic GN=ndhD OS=Cucumis melo subsp. melo PE=3 SV=1	gi|114329707|ref|YP_740527.1| NADH-plastoquinone oxidoreductase subunit 4 [Citrus sinensis]	Citrus sinensis chloroplast, complete genome
Maple_Unigene_BMK.34721	1.12e-06	-2.12343	down	--	--	Cellular Component: nucleus (GO:0005634);; Biological Process: regulation of transcription, DNA-dependent (GO:0006355);;	--	sp|O64647|TCP9_ARATH Transcription factor TCP9 OS=Arabidopsis thaliana GN=TCP9 PE=2 SV=1	Putative uncharacterized protein GN=RCOM_1613050 OS=Ricinus communis (Castor bean) PE=4 SV=1	gi|255541422|ref|XP_002511775.1| conserved hypothetical protein [Ricinus communis]	Vitis vinifera, whole genome shotgun sequence, contig VV78X118486.3, clone ENTAV 115
Maple_Unigene_BMK.21479	5.76e-07	-2.12341	down	--	--	Cellular Component: plasma membrane (GO:0005886);; Cellular Component: plasmodesma (GO:0009506);; Molecular Function: protein histidine kinase binding (GO:0043424);;	--	sp|C6SZP8|U497A_SOYBN UPF0497 membrane protein 10 OS=Glycine max PE=2 SV=1	Predicted protein GN=POPTRDRAFT_590593 OS=Populus trichocarpa (Western balsam poplar) PE=3 SV=1	gi|224081523|ref|XP_002335530.1| predicted protein [Populus trichocarpa]	--
Maple_Unigene_BMK.24196	6.54e-05	-2.12287	down	--	--	Cellular Component: chloroplast thylakoid membrane (GO:0009535);;	--	--	Putative uncharacterized protein GN=VITISV_038531 OS=Vitis vinifera (Grape) PE=4 SV=1	gi|147771520|emb|CAN75690.1| hypothetical protein VITISV_038531 [Vitis vinifera]	Vitis vinifera contig VV78X125253.13, whole genome shotgun sequence
Maple_Unigene_BMK.21024	0.000133744	-2.12195	down	--	--	Biological Process: signal transduction (GO:0007165);; Cellular Component: plastid (GO:0009536);; Molecular Function: Rac GTPase activator activity (GO:0030675);;	--	sp|Q54Y72|GACA_DICDI Rho GTPase-activating protein gacA OS=Dictyostelium discoideum GN=gacA PE=3 SV=1	Gtpase activating protein, putative GN=RCOM_1281750 OS=Ricinus communis (Castor bean) PE=4 SV=1	gi|255565663|ref|XP_002523821.1| gtpase activating protein, putative [Ricinus communis]	Ricinus communis gtpase activating protein, putative, mRNA
Maple_Unigene_BMK.9261	4.54e-07	-2.12148	down	[S]	Function unknown	Cellular Component: plasma membrane (GO:0005886);; Biological Process: oligopeptide transport (GO:0006857);; Biological Process: amino acid transport (GO:0006865);; Molecular Function: oligopeptide transporter activity (GO:0015198);; Biological Process: transmembrane transport (GO:0055085);;	--	sp|Q9SHY2|YSL7_ARATH Probable metal-nicotianamine transporter YSL7 OS=Arabidopsis thaliana GN=YSL7 PE=2 SV=1	Oligopeptide transporter, putative GN=RCOM_0786860 OS=Ricinus communis (Castor bean) PE=4 SV=1	gi|255582642|ref|XP_002532101.1| oligopeptide transporter, putative [Ricinus communis]	Ricinus communis oligopeptide transporter, putative, mRNA
Maple_Unigene_BMK.29677	1.45e-06	-2.11718	down	[E]	Amino acid transport and metabolism	Molecular Function: L-tyrosine:2-oxoglutarate aminotransferase activity (GO:0004838);; Biological Process: cellular amino acid metabolic process (GO:0006520);; Biological Process: iron ion transport (GO:0006826);; Cellular Component: plastid (GO:0009536);; Biological Process: vitamin E biosynthetic process (GO:0010189);; Molecular Function: pyridoxal phosphate binding (GO:0030170);; Molecular Fun…	K00815|0.0|pop:POPTR_568851|tyrosine aminotransferase [EC:2.6.1.5]	sp|Q9ST03|NAATB_HORVU Nicotianamine aminotransferase B OS=Hordeum vulgare GN=naat-B PE=1 SV=2	Aminotransferase family protein GN=AMT7 OS=Populus trichocarpa (Western balsam poplar) PE=4 SV=1	gi|224117120|ref|XP_002317481.1| aminotransferase family protein [Populus trichocarpa]	Populus trichocarpa aminotransferase family protein (AMT7), mRNA
Maple_Unigene_BMK.32997	1.67e-05	-2.11568	down	[H]	Coenzyme transport and metabolism	Molecular Function: L-aspartate oxidase activity (GO:0008734);; Molecular Function: electron carrier activity (GO:0009055);; Biological Process: NAD biosynthetic process (GO:0009435);; Cellular Component: chloroplast (GO:0009507);; Biological Process: cellular macromolecule metabolic process (GO:0044260);; Molecular Function: L-aspartate:fumarate oxidoreductase activity (GO:0044318);; Biological …	K00278|0.0|vvi:100242339|L-aspartate oxidase [EC:1.4.3.16]	sp|Q8XWM7|NADB1_RALSO L-aspartate oxidase 1 OS=Ralstonia solanacearum GN=nadB1 PE=3 SV=1	Putative uncharacterized protein GN=VIT_14s0066g01240 OS=Vitis vinifera (Grape) PE=4 SV=1	gi|225452458|ref|XP_002274361.1| PREDICTED: similar to AO (L-ASPARTATE OXIDASE); L-aspartate oxidase [Vitis vinifera]	PREDICTED: Vitis vinifera similar to AO (L-ASPARTATE OXIDASE); L-aspartate oxidase (LOC100242339), mRNA
Maple_Unigene_BMK.34848	9.23e-07	-2.11524	down	[P]	Inorganic ion transport and metabolism	Molecular Function: manganese ion transmembrane transporter activity (GO:0005384);; Molecular Function: calcium:sodium antiporter activity (GO:0005432);; Cellular Component: mitochondrion (GO:0005739);; Cellular Component: vacuolar membrane (GO:0005774);; Biological Process: cation transport (GO:0006812);; Biological Process: organ senescence (GO:0010260);; Molecular Function: potassium ion trans…	K13754|0.0|rcu:RCOM_1321050|solute carrier family 24 (sodium/potassium/calcium exchanger), member 6	sp|Q9SYG9|CCX4_ARATH Cation/calcium exchanger 4 OS=Arabidopsis thaliana GN=CCX4 PE=2 SV=1	Putative uncharacterized protein GN=VIT_08s0056g01480 OS=Vitis vinifera (Grape) PE=4 SV=1	gi|255569430|ref|XP_002525682.1| Sodium/potassium/calcium exchanger 6 precursor, putative [Ricinus communis]	Ricinus communis Sodium/potassium/calcium exchanger 6 precursor, putative, mRNA
Maple_Unigene_BMK.2982	0.00466709	-2.11502	down	[Z]	Cytoskeleton	Molecular Function: GTPase activity (GO:0003924);; Molecular Function: structural molecule activity (GO:0005198);; Molecular Function: GTP binding (GO:0005525);; Cellular Component: cytoplasm (GO:0005737);; Cellular Component: microtubule (GO:0005874);; Biological Process: GTP catabolic process (GO:0006184);; Biological Process: microtubule-based movement (GO:0007018);; Biological Process: protei…	--	sp|Q9ZRB0|TBB3_WHEAT Tubulin beta-3 chain OS=Triticum aestivum GN=TUBB3 PE=2 SV=1	Predicted protein (Fragment) OS=Hordeum vulgare var. distichum (Two-rowed barley) PE=2 SV=1	gi|314998966|gb|ADT65424.1| beta-tubulin [Caulerpa cf. racemosa GG-2009]	Populus trichocarpa tubulin, beta chain (TUB10), mRNA
Maple_Unigene_BMK.26782	0.00187401	-2.11219	down	[C]	Energy production and conversion	Molecular Function: NADH dehydrogenase (ubiquinone) activity (GO:0008137);; Cellular Component: chloroplast thylakoid membrane (GO:0009535);; Cellular Component: integral to membrane (GO:0016021);; Biological Process: ATP synthesis coupled electron transport (GO:0042773);; Molecular Function: quinone binding (GO:0048038);;	K05575|0.0|vvi:4025039|NADH dehydrogenase I subunit 4 [EC:1.6.5.3]	sp|B1A984|NU4C_CARPA NAD(P)H-quinone oxidoreductase chain 4, chloroplastic OS=Carica papaya GN=ndhD PE=3 SV=1	NAD(P)H-quinone oxidoreductase chain 4, chloroplastic GN=ndhD OS=Gonystylus bancanus PE=3 SV=1	gi|194132144|gb|ACF33398.1| NADH-plastoquinone oxidoreductase subunit 4 [Gonystylus bancanus]	Citrus sinensis chloroplast, complete genome
Maple_Unigene_BMK.20408	0.000749506	-2.10267	down	[J]	Translation, ribosomal structure and biogenesis	Molecular Function: structural constituent of ribosome (GO:0003735);; Cellular Component: ribosome (GO:0005840);; Biological Process: translation (GO:0006412);; Cellular Component: chloroplast (GO:0009507);;	--	sp|P10359|RR16_SINAL 30S ribosomal protein S16, chloroplastic OS=Sinapis alba GN=rps16 PE=3 SV=1	30S ribosomal protein S16, chloroplastic GN=rps16 OS=Lepidium virginicum (Virginia pepperweed) PE=3 SV=1	gi|133812|sp|P10359.1|RR16_SINAL RecName: Full=30S ribosomal protein S16, chloroplastic	Acer japonicum chloroplast rps16 gene, partial sequence, isolate: AHAUT1968
Maple_Unigene_BMK.46923	9.41e-07	-2.10256	down	[G]	Carbohydrate transport and metabolism	Molecular Function: magnesium ion binding (GO:0000287);; Molecular Function: monooxygenase activity (GO:0004497);; Cellular Component: chloroplast (GO:0009507);; Biological Process: photorespiration (GO:0009853);; Molecular Function: ribulose-bisphosphate carboxylase activity (GO:0016984);; Biological Process: reductive pentose-phosphate cycle (GO:0019253);; Biological Process: oxidation-reductio…	K01601|0.0|pop:Poptr_cp030|ribulose-bisphosphate carboxylase large chain [EC:4.1.1.39]	sp|Q49KZ0|RBL_EUCGG Ribulose bisphosphate carboxylase large chain OS=Eucalyptus globulus subsp. globulus GN=rbcL PE=3 SV=1	Ribulose bisphosphate carboxylase large chain GN=rbcL OS=Leitneria floridana PE=3 SV=1	gi|154814229|gb|ABS87166.1| ribulose-1,5-bisphosphate carboxylase/oxygenase large subunit [Leitneria floridana]	Acer palmatum ribulose-1,5-bisphosphate carboxylase/oxygenase large subunit (rbcL) gene, partial cds; chloroplast
Maple_Unigene_BMK.26408	9.1e-07	-2.10209	down	--	--	Cellular Component: endoplasmic reticulum (GO:0005783);; Cellular Component: plasma membrane (GO:0005886);; Cellular Component: chloroplast (GO:0009507);; Biological Process: systemic acquired resistance (GO:0009627);; Molecular Function: oligosaccharide transmembrane transporter activity (GO:0015157);; Cellular Component: cytoplasmic membrane-bounded vesicle (GO:0016023);; Biological Process: re…	K12669|1e-172|rcu:RCOM_0905660|oligosaccharyltransferase complex subunit gamma	sp|P34669|YO13_CAEEL Uncharacterized protein ZK686.3 OS=Caenorhabditis elegans GN=ZK686.3 PE=2 SV=1	Tumor suppressor candidate, putative GN=RCOM_0905660 OS=Ricinus communis (Castor bean) PE=4 SV=1	gi|255554977|ref|XP_002518526.1| Tumor suppressor candidate, putative [Ricinus communis]	Brassica rapa clone 55 unknown mRNA
Maple_Unigene_BMK.31270	0.000146839	-2.10171	down	--	--	Biological Process: MAPK cascade (GO:0000165);; Molecular Function: protein serine/threonine kinase activity (GO:0004674);; Molecular Function: ATP binding (GO:0005524);; Cellular Component: intracellular (GO:0005622);; Biological Process: protein phosphorylation (GO:0006468);; Biological Process: transmembrane receptor protein tyrosine kinase signaling pathway (GO:0007169);; Biological Process: …	--	sp|Q9LP24|Y1571_ARATH Probable leucine-rich repeat receptor-like protein kinase At1g35710 OS=Arabidopsis thaliana GN=At1g35710 PE=2 SV=1	Putative uncharacterized protein GN=VIT_17s0000g02360 OS=Vitis vinifera (Grape) PE=4 SV=1	gi|225456161|ref|XP_002278590.1| PREDICTED: hypothetical protein [Vitis vinifera]	--
Maple_Unigene_BMK.27513	3.64e-05	-2.10108	down	--	--	Molecular Function: protein serine/threonine kinase activity (GO:0004674);; Molecular Function: ATP binding (GO:0005524);; Cellular Component: plasma membrane (GO:0005886);; Biological Process: chromosome segregation (GO:0007059);; Biological Process: meiosis I (GO:0007127);; Cellular Component: plasmodesma (GO:0009506);; Biological Process: brassinosteroid mediated signaling pathway (GO:0009742)…	--	sp|Q9LK35|THE1_ARATH Receptor-like protein kinase THESEUS 1 OS=Arabidopsis thaliana GN=THE1 PE=1 SV=1	ATP binding protein, putative (Fragment) GN=RCOM_0240950 OS=Ricinus communis (Castor bean) PE=4 SV=1	gi|255589531|ref|XP_002534993.1| ATP binding protein, putative [Ricinus communis]	Populus trichocarpa predicted protein, mRNA
Maple_Unigene_BMK.20530	0.00298166	-2.0943	down	--	--	--	--	--	Werner syndrome ATP-dependent helicase GN=MTR_1g086720 OS=Medicago truncatula (Barrel medic) PE=4 SV=1	gi|225440185|ref|XP_002278268.1| PREDICTED: hypothetical protein [Vitis vinifera]	--
Maple_Unigene_BMK.32653	1.98e-06	-2.09074	down	--	--	Molecular Function: sequence-specific DNA binding transcription factor activity (GO:0003700);; Biological Process: regulation of transcription, DNA-dependent (GO:0006355);; Biological Process: cell differentiation (GO:0030154);; Biological Process: regulation of shoot development (GO:0048831);;	--	sp|O23210|SCL15_ARATH Scarecrow-like protein 15 OS=Arabidopsis thaliana GN=SCL15 PE=2 SV=2	GRAS family transcription factor GN=GRAS65 OS=Populus trichocarpa (Western balsam poplar) PE=4 SV=1	gi|224133860|ref|XP_002327698.1| GRAS family transcription factor [Populus trichocarpa]	Ricinus communis DNA binding protein, putative, mRNA
Maple_Unigene_BMK.36124	1.77e-06	-2.08832	down	--	--	Molecular Function: iron ion binding (GO:0005506);; Biological Process: response to wounding (GO:0009611);; Biological Process: response to abscisic acid stimulus (GO:0009737);; Biological Process: response to jasmonic acid stimulus (GO:0009753);; Biological Process: defense response to bacterium, incompatible interaction (GO:0009816);; Molecular Function: lipoxygenase activity (GO:0016165);; Bio…	--	sp|P38415|LOXA_SOLLC Lipoxygenase A OS=Solanum lycopersicum GN=LOX1.1 PE=2 SV=1	Lipoxygenase GN=POPTRDRAFT_782901 OS=Populus trichocarpa (Western balsam poplar) PE=3 SV=1	gi|224131548|ref|XP_002328567.1| predicted protein [Populus trichocarpa]	Populus trichocarpa predicted protein, mRNA
Maple_Unigene_BMK.34754	2.21e-06	-2.08372	down	--	--	Molecular Function: glucose-6-phosphate dehydrogenase activity (GO:0004345);; Molecular Function: protein binding (GO:0005515);; Biological Process: pentose-phosphate shunt, oxidative branch (GO:0009051);; Cellular Component: chloroplast (GO:0009507);; Molecular Function: NADP binding (GO:0050661);;	K00036|0.0|pop:POPTR_708767|glucose-6-phosphate 1-dehydrogenase [EC:1.1.1.49]	sp|Q43793|G6PDC_TOBAC Glucose-6-phosphate 1-dehydrogenase, chloroplastic OS=Nicotiana tabacum PE=2 SV=1	Glucose-6-phosphate 1-dehydrogenase GN=POPTRDRAFT_708767 OS=Populus trichocarpa (Western balsam poplar) PE=3 SV=1	gi|224053521|ref|XP_002297854.1| predicted protein [Populus trichocarpa]	Populus trichocarpa predicted protein, mRNA
Maple_Unigene_BMK.18490	0.00623013	-2.08265	down	[RTKL]	--	Molecular Function: protein serine/threonine kinase activity (GO:0004674);; Molecular Function: ATP binding (GO:0005524);; Cellular Component: plasma membrane (GO:0005886);; Biological Process: protein phosphorylation (GO:0006468);; Biological Process: transmembrane receptor protein tyrosine kinase signaling pathway (GO:0007169);; Cellular Component: integral to membrane (GO:0016021);;	--	sp|Q9M9C5|Y1680_ARATH Probable leucine-rich repeat receptor-like protein kinase At1g68400 OS=Arabidopsis thaliana GN=At1g68400 PE=1 SV=1	Predicted protein GN=POPTRDRAFT_589556 OS=Populus trichocarpa (Western balsam poplar) PE=4 SV=1	gi|224069764|ref|XP_002326408.1| predicted protein [Populus trichocarpa]	Ricinus communis Protein kinase APK1A, chloroplast precursor, putative, mRNA
Maple_Unigene_BMK.36404	0.000160505	-2.08254	down	[S]	Function unknown	--	--	sp|Q40392|TMVRN_NICGU TMV resistance protein N OS=Nicotiana glutinosa GN=N PE=1 SV=1	Putative uncharacterized protein GN=POPTRDRAFT_838042 OS=Populus trichocarpa (Western balsam poplar) PE=4 SV=1	gi|224120756|ref|XP_002330944.1| hypothetical protein POPTRDRAFT_838042 [Populus trichocarpa]	--
Maple_Unigene_BMK.27528	2.58e-06	-2.08138	down	[E]	Amino acid transport and metabolism	Molecular Function: cysteine synthase activity (GO:0004124);; Molecular Function: copper ion binding (GO:0005507);; Cellular Component: mitochondrion (GO:0005739);; Biological Process: glycolysis (GO:0006096);; Biological Process: cysteine biosynthetic process from serine (GO:0006535);; Biological Process: water transport (GO:0006833);; Biological Process: hyperosmotic response (GO:0006972);; Bio…	K13034|0.0|pop:POPTR_644475|L-3-cyanoalanine synthase/ cysteine synthase [EC:2.5.1.47 4.4.1.9]	sp|P32260|CYSKP_SPIOL Cysteine synthase, chloroplastic/chromoplastic OS=Spinacia oleracea GN=CYSK PE=1 SV=2	Cysteine synthase GN=POPTRDRAFT_644475 OS=Populus trichocarpa (Western balsam poplar) PE=3 SV=1	gi|224064041|ref|XP_002301362.1| predicted protein [Populus trichocarpa]	Populus trichocarpa predicted protein, mRNA
Maple_Unigene_BMK.19137	1.05e-06	-2.0787	down	--	--	Biological Process: transcription from RNA polymerase I promoter (GO:0006360);;	--	sp|Q10110|RRN3_SCHPO RNA polymerase I-specific transcription initiation factor rrn3 OS=Schizosaccharomyces pombe GN=rrn3 PE=2 SV=1	Putative uncharacterized protein GN=VIT_04s0044g01700 OS=Vitis vinifera (Grape) PE=4 SV=1	gi|296088515|emb|CBI37506.3| unnamed protein product [Vitis vinifera]	Ricinus communis transcription initiation factor ia, putative, mRNA
Maple_Unigene_BMK.19899	0.00199819	-2.07815	down	--	--	Biological Process: cation transport (GO:0006812);; Molecular Function: cation transmembrane transporter activity (GO:0008324);; Cellular Component: integral to membrane (GO:0016021);; Biological Process: transmembrane transport (GO:0055085);;	--	sp|Q8H329|MTP8_ORYSJ Metal tolerance protein 8 OS=Oryza sativa subsp. japonica GN=MTP8 PE=2 SV=2	Cation efflux protein/ zinc transporter, putative GN=RCOM_0852720 OS=Ricinus communis (Castor bean) PE=4 SV=1	gi|255552742|ref|XP_002517414.1| cation efflux protein/ zinc transporter, putative [Ricinus communis]	PREDICTED: Vitis vinifera hypothetical protein LOC100252487 (LOC100252487), mRNA
Maple_Unigene_BMK.24990	0.000135643	-2.07456	down	--	--	Cellular Component: mitochondrion (GO:0005739);; Cellular Component: plastid (GO:0009536);;	--	--	ATP synthase subunit alpha GN=MTR_1g006010 OS=Medicago truncatula (Barrel medic) PE=3 SV=1	gi|94502665|ref|YP_588403.1| hypothetical protein ZeamMp158 [Zea mays subsp. mays]	Citrus sinensis clone G05 small subunit ribosomal RNA gene, partial sequence; mitochondrial
Maple_Unigene_BMK.32174	0.000344712	-2.06882	down	--	--	Biological Process: metabolic process (GO:0008152);; Molecular Function: oxidoreductase activity (GO:0016491);;	--	sp|Q9LRT1|Y3804_ARATH Probably inactive leucine-rich repeat receptor-like protein kinase At3g28040 OS=Arabidopsis thaliana GN=At3g28040 PE=2 SV=1	Serine/threonine-protein kinase bri1, putative GN=RCOM_1452420 OS=Ricinus communis (Castor bean) PE=4 SV=1	gi|255543977|ref|XP_002513051.1| serine/threonine-protein kinase bri1, putative [Ricinus communis]	Malus floribunda clone M18-6As M18-6p gene, complete cds
Maple_Unigene_BMK.23616	7.89e-06	-2.06642	down	--	--	Molecular Function: transferase activity, transferring glycosyl groups (GO:0016757);;	--	--	Predicted protein GN=POPTRDRAFT_762397 OS=Populus trichocarpa (Western balsam poplar) PE=4 SV=1	gi|224090783|ref|XP_002309080.1| predicted protein [Populus trichocarpa]	Lotus japonicus genomic DNA, chromosome 1, clone: LjT34B12, TM0147b, complete sequence
Maple_Unigene_BMK.14269	0.0038991	-2.06577	down	--	--	Molecular Function: sequence-specific DNA binding transcription factor activity (GO:0003700);; Biological Process: regulation of transcription, DNA-dependent (GO:0006355);; Biological Process: response to nematode (GO:0009624);; Biological Process: response to auxin stimulus (GO:0009733);; Molecular Function: sequence-specific DNA binding (GO:0043565);;	--	sp|O22900|WRK23_ARATH Probable WRKY transcription factor 23 OS=Arabidopsis thaliana GN=WRKY23 PE=2 SV=1	WRKY1 GN=WRKY1 OS=Hevea brasiliensis (Para rubber tree) PE=2 SV=1	gi|255548389|ref|XP_002515251.1| WRKY transcription factor, putative [Ricinus communis]	(Populus tomentosa x P. bolleana) x P. tomentosa WRKY transcription factor 13 mRNA, complete cds
Maple_Unigene_BMK.34358	2.76e-05	-2.06384	down	--	--	Molecular Function: structural constituent of cell wall (GO:0005199);; Biological Process: plant-type cell wall organization (GO:0009664);;	--	sp|P06599|EXTN_DAUCA Extensin OS=Daucus carota PE=2 SV=1	Putative extensin GN=At2g43150 OS=Arabidopsis thaliana (Mouse-ear cress) PE=2 SV=1	gi|15224236|ref|NP_181844.1| proline-rich extensin-like family protein [Arabidopsis thaliana]	Manihot esculenta CRANTZ hydroxyproline-rich glycoprotein mRNA, complete cds
Maple_Unigene_BMK.23061	1.3e-06	-2.05988	down	[Q]	Secondary metabolites biosynthesis, transport and catabolism	Biological Process: defense response (GO:0006952);; Molecular Function: electron carrier activity (GO:0009055);; Biological Process: response to bacterium (GO:0009617);; Molecular Function: oxidoreductase activity, acting on paired donors, with incorporation or reduction of molecular oxygen, NADH or NADPH as one donor, and incorporation of one atom of oxygen (GO:0016709);; Molecular Function: hem…	--	sp|P24465|C71A1_PERAE Cytochrome P450 71A1 OS=Persea americana GN=CYP71A1 PE=1 SV=2	Putative uncharacterized protein GN=VIT_17s0000g09610 OS=Vitis vinifera (Grape) PE=3 SV=1	gi|224133724|ref|XP_002321645.1| cytochrome P450 [Populus trichocarpa]	Populus trichocarpa cytochrome P450 (CYP71AP4), mRNA
Maple_Unigene_BMK.31024	2.04e-05	-2.05988	down	[RTKL]	--	Molecular Function: protein serine/threonine kinase activity (GO:0004674);; Molecular Function: non-membrane spanning protein tyrosine kinase activity (GO:0004715);; Molecular Function: ATP binding (GO:0005524);; Cellular Component: nucleolus (GO:0005730);; Cellular Component: plasma membrane (GO:0005886);; Cellular Component: plastid (GO:0009536);; Biological Process: protein autophosphorylation…	--	sp|Q06548|APK1A_ARATH Protein kinase APK1A, chloroplastic OS=Arabidopsis thaliana GN=APK1A PE=2 SV=1	Protein kinase APK1B, chloroplast, putative GN=RCOM_0000910 OS=Ricinus communis (Castor bean) PE=3 SV=1	gi|255584865|ref|XP_002533148.1| Protein kinase APK1B, chloroplast precursor, putative [Ricinus communis]	PREDICTED: Vitis vinifera hypothetical protein LOC100246192 (LOC100246192), mRNA
Maple_Unigene_BMK.2079	6e-05	-2.05614	down	--	--	Biological Process: MAPK cascade (GO:0000165);; Molecular Function: protein binding (GO:0005515);; Biological Process: cellular response to nitrogen starvation (GO:0006995);; Cellular Component: chloroplast (GO:0009507);; Biological Process: salicylic acid biosynthetic process (GO:0009697);; Biological Process: defense response to bacterium, incompatible interaction (GO:0009816);; Biological Proc…	--	--	Predicted protein GN=POPTRDRAFT_825049 OS=Populus trichocarpa (Western balsam poplar) PE=4 SV=1	gi|224137696|ref|XP_002322621.1| predicted protein [Populus trichocarpa]	Vitis vinifera contig VV78X183590.7, whole genome shotgun sequence
Maple_Unigene_BMK.17687	1.46e-06	-2.05293	down	--	--	Cellular Component: extracellular space (GO:0005615);; Biological Process: calcium ion transport (GO:0006816);; Biological Process: Golgi organization (GO:0007030);; Biological Process: response to salt stress (GO:0009651);; Biological Process: cysteine biosynthetic process (GO:0019344);; Biological Process: cell wall biogenesis (GO:0042546);;	--	sp|P33050|PSC13_MAIZE Pollen-specific protein C13 OS=Zea mays GN=MGS1 PE=2 SV=1	Pollen-specific protein C13, putative GN=RCOM_1034130 OS=Ricinus communis (Castor bean) PE=4 SV=1	gi|255545650|ref|XP_002513885.1| Pollen-specific protein C13 precursor, putative [Ricinus communis]	Vitis pseudoreticulata pollen-specific protein mRNA, complete cds
Maple_Unigene_BMK.27177	0.000417997	-2.05196	down	--	--	Biological Process: signal transduction (GO:0007165);; Cellular Component: cytoplasmic membrane-bounded vesicle (GO:0016023);;	--	sp|Q9ZQQ7|Y2144_ARATH Putative leucine-rich repeat receptor-like serine/threonine-protein kinase At2g14440 OS=Arabidopsis thaliana GN=At2g14440 PE=1 SV=1	Putative uncharacterized protein GN=VIT_05s0020g03030 OS=Vitis vinifera (Grape) PE=4 SV=1	gi|225432596|ref|XP_002281432.1| PREDICTED: hypothetical protein [Vitis vinifera]	Populus EST from mild drought-stressed leaves
Maple_Unigene_BMK.20574	0.00831535	-2.04953	down	--	--	Biological Process: response to gibberellin stimulus (GO:0009739);;	--	sp|Q17RH7|TPRXL_HUMAN Putative protein TPRXL OS=Homo sapiens GN=TPRXL PE=5 SV=2	Putative uncharacterized protein GN=VIT_02s0025g04120 OS=Vitis vinifera (Grape) PE=4 SV=1	gi|225426832|ref|XP_002276651.1| PREDICTED: hypothetical protein [Vitis vinifera]	Vitis vinifera contig VV78X072496.9, whole genome shotgun sequence
Maple_Unigene_BMK.22770	2.28e-06	-2.04461	down	[M]	Cell wall/membrane/envelope biogenesis	Molecular Function: UDP-glucose 6-dehydrogenase activity (GO:0003979);; Cellular Component: cell wall (GO:0005618);; Cellular Component: nucleus (GO:0005634);; Cellular Component: cytosol (GO:0005829);; Biological Process: glucose catabolic process (GO:0006007);; Biological Process: Golgi organization (GO:0007030);; Biological Process: vacuole organization (GO:0007033);; Biological Process: D-xyl…	K00012|0.0|vvi:100264653|UDPglucose 6-dehydrogenase [EC:1.1.1.22]	sp|Q96558|UGDH_SOYBN UDP-glucose 6-dehydrogenase OS=Glycine max PE=2 SV=1	UDP-glucose 6-dehydrogenase GN=MTR_7g012950 OS=Medicago truncatula (Barrel medic) PE=3 SV=1	gi|315258127|gb|ADT91651.1| putative uridine diphosphate glucose dehydrogenase [Galega orientalis]	Vitis vinifera contig VV78X211477.3, whole genome shotgun sequence
Maple_Unigene_BMK.6308	1.65e-06	-2.04345	down	--	--	Molecular Function: peroxidase activity (GO:0004601);; Cellular Component: vacuole (GO:0005773);; Biological Process: response to oxidative stress (GO:0006979);; Cellular Component: plant-type cell wall (GO:0009505);; Cellular Component: plasmodesma (GO:0009506);; Biological Process: regulation of meristem growth (GO:0010075);; Cellular Component: membrane (GO:0016020);; Molecular Function: heme …	--	sp|Q96520|PER12_ARATH Peroxidase 12 OS=Arabidopsis thaliana GN=PER12 PE=1 SV=1	Peroxidase 4 OS=Litchi chinensis (Lychee) PE=2 SV=1	gi|218138216|gb|ACK57683.1| peroxidase 4 [Litchi chinensis]	Litchi chinensis peroxidase 4 mRNA, complete cds
Maple_Unigene_BMK.38918	0.00646485	-2.04267	down	--	--	Biological Process: signal transduction (GO:0007165);; Molecular Function: kinase activity (GO:0016301);; Biological Process: phosphorylation (GO:0016310);; Molecular Function: 2-alkenal reductase [NAD(P)] activity (GO:0032440);; Biological Process: oxidation-reduction process (GO:0055114);;	--	sp|C0LGF5|Y1341_ARATH Probable LRR receptor-like serine/threonine-protein kinase At1g34110 OS=Arabidopsis thaliana GN=At1g34110 PE=2 SV=2	Serine-threonine protein kinase, plant-type, putative GN=RCOM_0811600 OS=Ricinus communis (Castor bean) PE=4 SV=1	gi|255555307|ref|XP_002518690.1| serine-threonine protein kinase, plant-type, putative [Ricinus communis]	Populus trichocarpa predicted protein, mRNA
Maple_Unigene_BMK.22620	0.00148354	-2.03764	down	[E]	Amino acid transport and metabolism	Molecular Function: L-aspartate:2-oxoglutarate aminotransferase activity (GO:0004069);; Molecular Function: copper ion binding (GO:0005507);; Cellular Component: cell wall (GO:0005618);; Cellular Component: peroxisome (GO:0005777);; Cellular Component: cytosol (GO:0005829);; Cellular Component: plasma membrane (GO:0005886);; Biological Process: cellular amino acid metabolic process (GO:0006520);;…	K00813|4e-60|pop:POPTR_835881|aspartate aminotransferase [EC:2.6.1.1]	sp|P28734|AATC_DAUCA Aspartate aminotransferase, cytoplasmic OS=Daucus carota PE=2 SV=1	Aspartate aminotransferase GN=POPTRDRAFT_835881 OS=Populus trichocarpa (Western balsam poplar) PE=2 SV=1	gi|224143559|ref|XP_002324997.1| predicted protein [Populus trichocarpa]	Populus trichocarpa predicted protein, mRNA
Maple_Unigene_BMK.30323	8.39e-05	-2.03698	down	--	--	Molecular Function: catalytic activity (GO:0003824);;	--	sp|Q9FL28|FLS2_ARATH LRR receptor-like serine/threonine-protein kinase FLS2 OS=Arabidopsis thaliana GN=FLS2 PE=1 SV=1	Predicted protein GN=POPTRDRAFT_555046 OS=Populus trichocarpa (Western balsam poplar) PE=4 SV=1	gi|224072885|ref|XP_002303927.1| predicted protein [Populus trichocarpa]	--
Maple_Unigene_BMK.36427	2.96e-06	-2.03466	down	--	--	Molecular Function: DNA binding (GO:0003677);; Molecular Function: protein binding (GO:0005515);; Cellular Component: nucleus (GO:0005634);; Cellular Component: vacuole (GO:0005773);; Cellular Component: cytosol (GO:0005829);; Biological Process: brassinosteroid mediated signaling pathway (GO:0009742);; Biological Process: negative regulation of transcription, DNA-dependent (GO:0045892);;	--	sp|Q94A43|BEH2_ARATH BES1/BZR1 homolog protein 2 OS=Arabidopsis thaliana GN=BEH2 PE=1 SV=1	Predicted protein GN=POPTRDRAFT_719435 OS=Populus trichocarpa (Western balsam poplar) PE=2 SV=1	gi|224094697|ref|XP_002310201.1| predicted protein [Populus trichocarpa]	TSA: Jatropha curcas Contig7645, mRNA sequence
Maple_Unigene_BMK.24942	3.29e-06	-2.02175	down	[G]	Carbohydrate transport and metabolism	Molecular Function: protein binding (GO:0005515);; Cellular Component: vacuole (GO:0005773);; Cellular Component: plasma membrane (GO:0005886);; Biological Process: iron ion transport (GO:0006826);; Biological Process: water transport (GO:0006833);; Biological Process: response to osmotic stress (GO:0006970);; Biological Process: response to desiccation (GO:0009269);; Cellular Component: chloropl…	--	sp|Q9SV31|PIP25_ARATH Probable aquaporin PIP2-5 OS=Arabidopsis thaliana GN=PIP2-5 PE=1 SV=1	Aquaporin protein GN=PIP2-1 OS=Vitis pseudoreticulata PE=2 SV=1	gi|85376638|gb|ABC70536.1| aquaporin protein [Vitis pseudoreticulata]	Pyrus communis Py-PIP2-2 mRNA for plasma membrane intrinsic protein 2-2, complete cds
Maple_Unigene_BMK.32104	2.72e-06	-2.01814	down	[G]	Carbohydrate transport and metabolism	Molecular Function: beta-mannosidase activity (GO:0004567);; Biological Process: carbohydrate metabolic process (GO:0005975);; Cellular Component: plant-type cell wall (GO:0009505);; Cellular Component: cytoplasmic membrane-bounded vesicle (GO:0016023);; Cellular Component: cytosolic ribosome (GO:0022626);; Molecular Function: cation binding (GO:0043169);; Molecular Function: amygdalin beta-gluco…	--	sp|Q9LV33|BGL44_ARATH Beta-glucosidase 44 OS=Arabidopsis thaliana GN=BGLU44 PE=2 SV=1	Putative uncharacterized protein OS=Glycine max (Soybean) PE=2 SV=1	gi|255648156|gb|ACU24532.1| unknown [Glycine max]	Populus trichocarpa predicted protein, mRNA
Maple_Unigene_BMK.19867	4.38e-05	-2.0161	down	--	--	Cellular Component: endoplasmic reticulum (GO:0005783);; Biological Process: endoplasmic reticulum organization (GO:0007029);; Cellular Component: plasmodesma (GO:0009506);; Cellular Component: plant-type vacuole membrane (GO:0009705);; Biological Process: response to organic substance (GO:0010033);; Cellular Component: ER body (GO:0010168);; Molecular Function: hydrolase activity, acting on este…	--	sp|Q7XA74|GDL21_ARATH GDSL esterase/lipase At1g54030 OS=Arabidopsis thaliana GN=At1g54030 PE=2 SV=1	Zinc finger protein, putative GN=RCOM_0354380 OS=Ricinus communis (Castor bean) PE=4 SV=1	gi|255586576|ref|XP_002533923.1| zinc finger protein, putative [Ricinus communis]	--
Maple_Unigene_BMK.33986	4.21e-05	-2.01489	down	--	--	Biological Process: regulation of transcription, DNA-dependent (GO:0006355);;	--	sp|Q69VG1|CIGR1_ORYSJ Chitin-inducible gibberellin-responsive protein 1 OS=Oryza sativa subsp. japonica GN=CIGR1 PE=2 SV=1	GRAS family transcription factor GN=GRAS56 OS=Populus trichocarpa (Western balsam poplar) PE=4 SV=1	gi|224126261|ref|XP_002319796.1| GRAS family transcription factor [Populus trichocarpa]	Populus trichocarpa GRAS family transcription factor (GRAS55), mRNA
Maple_Unigene_BMK.19927	0.00853649	-2.01101	down	[Z]	Cytoskeleton	Molecular Function: ATP binding (GO:0005524);;	--	sp|O81221|ACT_GOSHI Actin OS=Gossypium hirsutum PE=3 SV=1	Actin 2 (Fragment) GN=PsACT2 OS=Papaver somniferum (Opium poppy) PE=2 SV=1	gi|305682526|dbj|BAJ16350.1| actin 2 [Papaver somniferum]	Bruguiera gymnorhiza BgAct1 mRNA for beta actin, partial cds
Maple_Unigene_BMK.36395	1.04e-05	-2.00883	down	--	--	Molecular Function: serine-type endopeptidase activity (GO:0004252);; Cellular Component: plant-type cell wall (GO:0009505);; Cellular Component: extracellular matrix (GO:0031012);; Cellular Component: apoplast (GO:0048046);; Biological Process: mucilage metabolic process involved seed coat development (GO:0048359);; Biological Process: mucilage extrusion from seed coat (GO:0080001);;	--	sp|O65351|SUBL_ARATH Subtilisin-like protease OS=Arabidopsis thaliana GN=ARA12 PE=1 SV=1	Predicted protein GN=POPTRDRAFT_730951 OS=Populus trichocarpa (Western balsam poplar) PE=3 SV=1	gi|296089128|emb|CBI38831.3| unnamed protein product [Vitis vinifera]	PREDICTED: Vitis vinifera hypothetical protein LOC100257393 (LOC100257393), mRNA
Maple_Unigene_BMK.25620	3.8e-06	-2.00707	down	--	--	Cellular Component: photosystem II (GO:0009523);; Cellular Component: chloroplast thylakoid membrane (GO:0009535);; Biological Process: photosynthetic electron transport in photosystem II (GO:0009772);; Cellular Component: integral to membrane (GO:0016021);; Molecular Function: chlorophyll binding (GO:0016168);; Biological Process: protein-chromophore linkage (GO:0018298);; Cellular Component: li…	K02705|0.0|vvi:4025084|photosystem II CP43 chlorophyll apoprotein	sp|B1NWE6|PSBC_MANES Photosystem II CP43 chlorophyll apoprotein OS=Manihot esculenta GN=psbC PE=3 SV=1	Photosystem II protein CP43 (Fragment) GN=psbC OS=Mollugo verticillata PE=4 SV=1	gi|260677380|ref|YP_003208174.1| photosystem II CP43 chlorophyll apoprotein [Coix lacryma-jobi]	Citrus sinensis chloroplast, complete genome
Maple_Unigene_BMK.27838	4.52e-05	-2.00555	down	--	--	Cellular Component: extracellular region (GO:0005576);; Biological Process: syncytium formation (GO:0006949);; Cellular Component: plant-type cell wall (GO:0009505);; Biological Process: plant-type cell wall organization (GO:0009664);; Biological Process: response to red light (GO:0010114);; Biological Process: regulation of stomatal movement (GO:0010119);; Cellular Component: membrane (GO:001602…	--	sp|Q9C554|EXPA1_ARATH Expansin-A1 OS=Arabidopsis thaliana GN=EXPA1 PE=2 SV=1	Expansin GN=EXP4 OS=Fragaria ananassa (Strawberry) PE=2 SV=1	gi|77167275|gb|ABA62612.1| expansin [Fragaria x ananassa]	Dimocarpus longan expansin 2 (Exp2) mRNA, complete cds
Maple_Unigene_BMK.36392	5.31e-06	-2.00126	down	--	--	Molecular Function: serine-type endopeptidase activity (GO:0004252);; Cellular Component: cell wall (GO:0005618);; Biological Process: metabolic process (GO:0008152);; Cellular Component: extracellular matrix (GO:0031012);; Cellular Component: apoplast (GO:0048046);;	--	sp|O65351|SUBL_ARATH Subtilisin-like protease OS=Arabidopsis thaliana GN=ARA12 PE=1 SV=1	Putative uncharacterized protein GN=VITISV_018252 OS=Vitis vinifera (Grape) PE=4 SV=1	gi|147851957|emb|CAN82246.1| hypothetical protein VITISV_018252 [Vitis vinifera]	PREDICTED: Vitis vinifera hypothetical protein LOC100262514 (LOC100262514), mRNA
Maple_Unigene_BMK.25334	3.3e-06	-2.00076	down	[RTKL]	--	Biological Process: defense response to oomycetes (GO:0002229);; Molecular Function: protein serine/threonine kinase activity (GO:0004674);; Molecular Function: MAP kinase kinase activity (GO:0004708);; Molecular Function: protein binding (GO:0005515);; Molecular Function: ATP binding (GO:0005524);; Biological Process: tryptophan catabolic process (GO:0006569);; Biological Process: multicellular …	--	sp|Q8RXG3|M2K5_ARATH Mitogen-activated protein kinase kinase 5 OS=Arabidopsis thaliana GN=MKK5 PE=1 SV=2	Putative uncharacterized protein OS=Populus trichocarpa x Populus deltoides PE=2 SV=1	gi|118489678|gb|ABK96640.1| unknown [Populus trichocarpa x Populus deltoides]	Vitis vinifera contig VV78X157108.5, whole genome shotgun sequence
Maple_Unigene_BMK.32833	5.5e-05	-1.99913	down	--	--	Molecular Function: transporter activity (GO:0005215);; Cellular Component: plasma membrane (GO:0005886);; Biological Process: oligopeptide transport (GO:0006857);; Biological Process: response to karrikin (GO:0080167);;	--	sp|Q9LV10|PTR53_ARATH Probable peptide/nitrate transporter At5g62680 OS=Arabidopsis thaliana GN=At5g62680 PE=2 SV=1	Putative uncharacterized protein GN=VIT_14s0066g02590 OS=Vitis vinifera (Grape) PE=4 SV=1	gi|225452684|ref|XP_002276806.1| PREDICTED: hypothetical protein [Vitis vinifera]	PREDICTED: Vitis vinifera hypothetical protein LOC100244038 (LOC100244038), mRNA
Maple_Unigene_BMK.24231	9.88e-05	-1.99896	down	[O]	Posttranslational modification, protein turnover, chaperones	Molecular Function: ATP binding (GO:0005524);; Cellular Component: chloroplast (GO:0009507);; Molecular Function: ATPase activity (GO:0016887);; Biological Process: protein metabolic process (GO:0019538);;	--	sp|O22034|CFXQ2_CYACA Protein cfxQ homolog OS=Cyanidium caldarium GN=cfxQ PE=3 SV=1	Putative uncharacterized protein GN=VIT_11s0016g03900 OS=Vitis vinifera (Grape) PE=4 SV=1	gi|225445236|ref|XP_002280965.1| PREDICTED: hypothetical protein [Vitis vinifera]	Ricinus communis Protein cbxX, chromosomal, putative, mRNA
Maple_Unigene_BMK.29355	0.000579832	-1.99652	down	--	--	Biological Process: multicellular organismal development (GO:0007275);;	--	sp|O49816|LEA1_CICAR Late embryogenesis abundant protein 1 OS=Cicer arietinum PE=2 SV=1	Late embryogenesis abundant protein group 3 protein GN=LEA3-1 OS=Arachis hypogaea (Peanut) PE=2 SV=1	gi|24418488|sp|O49816.1|LEA1_CICAR RecName: Full=Late embryogenesis abundant protein 1; AltName: Full=CapLEA-1	Daucus carota Lea1P mRNA, complete cds
Maple_Unigene_BMK.33267	3.91e-06	-1.99471	down	[GEPR]	--	Molecular Function: sugar:hydrogen symporter activity (GO:0005351);; Cellular Component: nucleus (GO:0005634);; Cellular Component: vacuole (GO:0005773);; Cellular Component: plasma membrane (GO:0005886);; Biological Process: carbohydrate transport (GO:0008643);; Cellular Component: plasmodesma (GO:0009506);; Biological Process: response to nematode (GO:0009624);; Biological Process: systemic acq…	--	sp|Q41144|STC_RICCO Sugar carrier protein C OS=Ricinus communis GN=STC PE=2 SV=1	Hexose transporter GN=HT1 OS=Vitis vinifera (Grape) PE=3 SV=1	gi|225468155|ref|XP_002270364.1| PREDICTED: hypothetical protein [Vitis vinifera]	Hevea brasiliensis mRNA for putative hexose transporter protein (hxt1 gene)
Maple_Unigene_BMK.32204	1.54e-05	-1.99383	down	--	--	Biological Process: amino acid transport (GO:0006865);; Molecular Function: hydrolase activity (GO:0016787);;	--	sp|Q680C0|GDL62_ARATH GDSL esterase/lipase At4g10955 OS=Arabidopsis thaliana GN=At4g10955 PE=2 SV=1	Predicted protein GN=POPTRDRAFT_646766 OS=Populus trichocarpa (Western balsam poplar) PE=4 SV=1	gi|224072212|ref|XP_002303655.1| predicted protein [Populus trichocarpa]	Populus trichocarpa predicted protein, mRNA
Maple_Unigene_BMK.32930	0.000459628	-1.99334	down	--	--	Molecular Function: peroxidase activity (GO:0004601);; Molecular Function: iron ion binding (GO:0005506);; Molecular Function: calcium ion binding (GO:0005509);; Cellular Component: Golgi apparatus (GO:0005794);; Biological Process: osmosensory signaling pathway (GO:0007231);; Molecular Function: electron carrier activity (GO:0009055);; Biological Process: response to heat (GO:0009408);; Biologic…	K13447|0.0|rcu:RCOM_1438900|respiratory burst oxidase [EC:1.6.3.- 1.11.1.-]	sp|Q9FIJ0|RBOHD_ARATH Respiratory burst oxidase homolog protein D OS=Arabidopsis thaliana GN=RBOHD PE=1 SV=1	Respiratory burst oxidase, putative GN=RCOM_1438900 OS=Ricinus communis (Castor bean) PE=4 SV=1	gi|255543278|ref|XP_002512702.1| respiratory burst oxidase, putative [Ricinus communis]	Populus trichocarpa predicted protein, mRNA
Maple_Unigene_BMK.26728	0.000335524	-1.98928	down	[I]	Lipid transport and metabolism	Molecular Function: carboxylesterase activity (GO:0004091);; Cellular Component: cytosol (GO:0005829);;	--	sp|Q9SMN0|CXE12_ARATH Probable carboxylesterase 12 OS=Arabidopsis thaliana GN=CXE12 PE=2 SV=1	Predicted protein GN=POPTRDRAFT_596314 OS=Populus trichocarpa (Western balsam poplar) PE=4 SV=1	gi|224143293|ref|XP_002336023.1| predicted protein [Populus trichocarpa]	Lotus japonicus genomic DNA, chromosome 4, clone: LjT13P22, TM0079c, complete sequence
Maple_Unigene_BMK.23124	4.88e-06	-1.9891	down	[T]	Signal transduction mechanisms	Cellular Component: nucleus (GO:0005634);; Cellular Component: vacuole (GO:0005773);; Cellular Component: cytosol (GO:0005829);; Cellular Component: plasma membrane (GO:0005886);; Cellular Component: chloroplast (GO:0009507);; Biological Process: brassinosteroid mediated signaling pathway (GO:0009742);; Molecular Function: protein domain specific binding (GO:0019904);; Biological Process: respons…	K06630|1e-41|pop:POPTR_651251|tyrosine 3-monooxygenase/tryptophan 5-monooxygenase activation protein	sp|P46266|1433_PEA 14-3-3-like protein OS=Pisum sativum PE=2 SV=1	Predicted protein GN=POPTRDRAFT_651251 OS=Populus trichocarpa (Western balsam poplar) PE=2 SV=1	gi|224084622|ref|XP_002307363.1| predicted protein [Populus trichocarpa]	TSA: Cajanus cajan cultivar Asha contig06085.Asha mRNA sequence
Maple_Unigene_BMK.36494	0.00120799	-1.98531	down	--	--	--	--	sp|Q7XA40|RGA3_SOLBU Putative disease resistance protein RGA3 OS=Solanum bulbocastanum GN=RGA3 PE=2 SV=2	Putative uncharacterized protein GN=VITISV_018646 OS=Vitis vinifera (Grape) PE=4 SV=1	gi|147815462|emb|CAN66086.1| hypothetical protein VITISV_018646 [Vitis vinifera]	--
Maple_Unigene_BMK.23486	8.01e-05	-1.98395	down	[RTKL]	--	Molecular Function: protein serine/threonine kinase activity (GO:0004674);; Molecular Function: protein tyrosine kinase activity (GO:0004713);; Molecular Function: signal transducer activity (GO:0004871);; Molecular Function: ATP binding (GO:0005524);; Biological Process: protein phosphorylation (GO:0006468);; Molecular Function: carbohydrate binding (GO:0030246);;	--	sp|Q9LXA5|LRK91_ARATH L-type lectin-domain containing receptor kinase IX.1 OS=Arabidopsis thaliana GN=LECRK91 PE=2 SV=1	Kinase, putative GN=RCOM_0818920 OS=Ricinus communis (Castor bean) PE=3 SV=1	gi|255554623|ref|XP_002518350.1| kinase, putative [Ricinus communis]	Ricinus communis kinase, putative, mRNA
Maple_Unigene_BMK.11982	0.000792993	-1.98121	down	[R]	General function prediction only	Cellular Component: nucleus (GO:0005634);; Cellular Component: cytosol (GO:0005829);; Biological Process: fatty acid beta-oxidation (GO:0006635);; Cellular Component: proteasome regulatory particle, lid subcomplex (GO:0008541);; Biological Process: toxin catabolic process (GO:0009407);; Biological Process: leaf morphogenesis (GO:0009965);; Biological Process: seed dormancy process (GO:0010162);; …	K03038|2e-39|pop:POPTR_820395|26S proteasome regulatory subunit N8	sp|O24412|PSD7_ARATH Probable 26S proteasome non-ATPase regulatory subunit 7 OS=Arabidopsis thaliana GN=RPN8 PE=2 SV=1	Predicted protein GN=POPTRDRAFT_820395 OS=Populus trichocarpa (Western balsam poplar) PE=4 SV=1	gi|224101105|ref|XP_002312144.1| predicted protein [Populus trichocarpa]	Soybean clone JCVI-FLGm-22B3 unknown mRNA
Maple_Unigene_BMK.31217	1.51e-05	-1.97977	down	[Q]	Secondary metabolites biosynthesis, transport and catabolism	Molecular Function: electron carrier activity (GO:0009055);; Molecular Function: heme binding (GO:0020037);; Molecular Function: isoflavone 2'-hydroxylase activity (GO:0033773);; Biological Process: oxidation-reduction process (GO:0055114);;	--	sp|P93147|C81E1_GLYEC Isoflavone 2&apos;-hydroxylase OS=Glycyrrhiza echinata GN=CYP81E1 PE=1 SV=2	Putative uncharacterized protein GN=VIT_18s0001g09510 OS=Vitis vinifera (Grape) PE=3 SV=1	gi|225458768|ref|XP_002285105.1| PREDICTED: hypothetical protein [Vitis vinifera]	TSA: Artemisia annua strain Madagascar Contig2632.Mt mRNA sequence
Maple_Unigene_BMK.32039	0.00871923	-1.97664	down	--	--	Molecular Function: transporter activity (GO:0005215);; Cellular Component: plasma membrane (GO:0005886);; Biological Process: oligopeptide transport (GO:0006857);; Cellular Component: integral to membrane (GO:0016021);;	--	sp|Q8LPL2|PTR32_ARATH Probable peptide/nitrate transporter At3g16180 OS=Arabidopsis thaliana GN=At3g16180 PE=2 SV=2	Predicted protein GN=POPTRDRAFT_751814 OS=Populus trichocarpa (Western balsam poplar) PE=4 SV=1	gi|224059108|ref|XP_002299719.1| predicted protein [Populus trichocarpa]	Populus trichocarpa predicted protein, mRNA
Maple_Unigene_BMK.12704	0.00684609	-1.97488	down	--	--	Molecular Function: ATP binding (GO:0005524);; Cellular Component: nucleus (GO:0005634);; Cellular Component: vacuole (GO:0005773);; Cellular Component: plasma membrane (GO:0005886);; Biological Process: ATP catabolic process (GO:0006200);; Biological Process: ATP biosynthetic process (GO:0006754);; Biological Process: cation transport (GO:0006812);; Molecular Function: hydrogen-exporting ATPase …	K01535|1e-146|pop:POPTR_743411|H+-transporting ATPase [EC:3.6.3.6]	sp|Q03194|PMA4_NICPL Plasma membrane ATPase 4 OS=Nicotiana plumbaginifolia GN=PMA4 PE=2 SV=1	Proton-exporting ATPase (Fragment) GN=ha2 OS=Cucumis sativus (Cucumber) PE=2 SV=1	gi|53828191|emb|CAG28306.1| proton-exporting ATPase [Cucumis sativus]	Sesbania rostrata srha4 mRNA for plasma membrane H+-ATPase, complete cds
Maple_Unigene_BMK.25984	1.43e-05	-1.97295	down	--	--	Cellular Component: ubiquitin ligase complex (GO:0000151);; Molecular Function: ubiquitin-protein ligase activity (GO:0004842);; Cellular Component: kinesin complex (GO:0005871);; Cellular Component: chloroplast (GO:0009507);; Biological Process: protein ubiquitination (GO:0016567);; Molecular Function: kinesin binding (GO:0019894);; Molecular Function: transmembrane receptor protein serine/threo…	--	sp|O48700|PUB6_ARATH U-box domain-containing protein 6 OS=Arabidopsis thaliana GN=PUB6 PE=2 SV=2	Predicted protein GN=POPTRDRAFT_726064 OS=Populus trichocarpa (Western balsam poplar) PE=4 SV=1	gi|224107629|ref|XP_002314542.1| predicted protein [Populus trichocarpa]	Populus trichocarpa predicted protein, mRNA
Maple_Unigene_BMK.42910	0.00438852	-1.97192	down	[C]	Energy production and conversion	Molecular Function: cytochrome-c oxidase activity (GO:0004129);; Molecular Function: copper ion binding (GO:0005507);; Cellular Component: mitochondrial inner membrane (GO:0005743);; Molecular Function: electron carrier activity (GO:0009055);; Cellular Component: integral to membrane (GO:0016021);; Molecular Function: heme binding (GO:0020037);; Biological Process: respiratory electron transport …	K02261|2e-91|rcu:RCOM_2040580|cytochrome c oxidase subunit II [EC:1.9.3.1]	sp|P93285|COX2_ARATH Cytochrome c oxidase subunit 2 OS=Arabidopsis thaliana GN=COX2 PE=1 SV=2	Cytochrome c oxidase subunit 2 (Fragment) GN=cox2 OS=Millettia pinnata PE=3 SV=1	gi|2687657|gb|AAB88867.1| cytochrome c oxidase subunit II [Raphanus sativus]	Nicotiana tabacum mitochondrial DNA, complete genome
Maple_Unigene_BMK.14712	0.00438852	-1.97192	down	--	--	Molecular Function: transferase activity, transferring glycosyl groups (GO:0016757);;	--	sp|Q9ZQ94|COGT3_ARATH Cytokinin-O-glucosyltransferase 3 OS=Arabidopsis thaliana GN=UGT73C5 PE=2 SV=1	Putative uncharacterized protein GN=VIT_02s0033g00240 OS=Vitis vinifera (Grape) PE=3 SV=1	gi|147768453|emb|CAN78332.1| hypothetical protein VITISV_034975 [Vitis vinifera]	Medicago truncatula chromosome 5 clone mth4-28c15, COMPLETE SEQUENCE
Maple_Unigene_BMK.27836	0.00438852	-1.97192	down	--	--	Biological Process: transcription, DNA-dependent (GO:0006351);; Biological Process: response to cold (GO:0009409);;	--	sp|P93835|DRE1B_ARATH Dehydration-responsive element-binding protein 1B OS=Arabidopsis thaliana GN=DREB1B PE=2 SV=2	AP2/ERF domain-containing transcription factor GN=DREB70 OS=Populus trichocarpa (Western balsam poplar) PE=4 SV=1	gi|224122476|ref|XP_002318846.1| AP2/ERF domain-containing transcription factor [Populus trichocarpa]	Ammopiptanthus mongolicus C-repeat binding factor 1 (CBF1) mRNA, complete cds
Maple_Unigene_BMK.1905	1.81e-05	-1.97124	down	--	--	--	K07374|8e-11|vvi:100247081|tubulin alpha	sp|Q9FT36|TBA_DAUCA Tubulin alpha chain OS=Daucus carota GN=TBA PE=2 SV=1	Alpha-tubulin (Fragment) OS=Pinus taeda (Loblolly pine) PE=2 SV=1	gi|13926087|gb|AAK49527.1| alpha-tubulin [Pinus taeda]	Betula pendula mRNA for alpha-tubulin (atub gene)
Maple_Unigene_BMK.31043	1.67e-05	-1.97012	down	[R]	General function prediction only	Molecular Function: acid phosphatase activity (GO:0003993);;	--	sp|P27061|PPA1_SOLLC Acid phosphatase 1 OS=Solanum lycopersicum GN=APS1 PE=2 SV=1	Predicted protein GN=POPTRDRAFT_705836 OS=Populus trichocarpa (Western balsam poplar) PE=4 SV=1	gi|224059158|ref|XP_002299744.1| predicted protein [Populus trichocarpa]	Vitis hybrid cultivar Tam-RVIP3 mRNA for hypothetical protein, complete cds
Maple_Unigene_BMK.35354	2.79e-05	-1.96419	down	--	--	--	--	--	Putative uncharacterized protein GN=VIT_05s0102g01130 OS=Vitis vinifera (Grape) PE=4 SV=1	gi|225433980|ref|XP_002269508.1| PREDICTED: hypothetical protein [Vitis vinifera]	Populus trichocarpa predicted protein, mRNA
Maple_Unigene_BMK.35764	7.08e-06	-1.95727	down	[E]	Amino acid transport and metabolism	Molecular Function: 5-methyltetrahydropteroyltriglutamate-homocysteine S-methyltransferase activity (GO:0003871);; Molecular Function: copper ion binding (GO:0005507);; Cellular Component: vacuolar membrane (GO:0005774);; Cellular Component: peroxisome (GO:0005777);; Cellular Component: Golgi apparatus (GO:0005794);; Cellular Component: cytosol (GO:0005829);; Cellular Component: plasma membrane (…	K00549|2e-96|pop:POPTR_679841|5-methyltetrahydropteroyltriglutamate--homocysteine methyltransferase [EC:2.1.1.14]	sp|O50008|METE_ARATH 5-methyltetrahydropteroyltriglutamate--homocysteine methyltransferase OS=Arabidopsis thaliana GN=CIMS PE=1 SV=1	5-methyltetrahydropteroyltriglutamate-homocysteine methyltransferase, putative, expressed GN=LOC_Os12g42884 OS=Oryza sativa subsp. japonica (Rice) PE=4 SV=1	gi|108862994|gb|ABG22097.1| 5-methyltetrahydropteroyltriglutamate-homocysteine methyltransferase, putative, expressed [Oryza sativa Japonica Group]	Populus trichocarpa vitamin-b12 independent methionine synthase, 5-methyltetrahydropteroyltriglutamate-homocysteine (MS4), mRNA
Maple_Unigene_BMK.14572	3.28e-05	-1.95288	down	--	--	Biological Process: response to hypoxia (GO:0001666);; Molecular Function: DNA binding (GO:0003677);; Cellular Component: nucleus (GO:0005634);; Biological Process: regulation of transcription, DNA-dependent (GO:0006355);; Biological Process: regulation of cell size (GO:0008361);; Biological Process: response to light stimulus (GO:0009416);; Biological Process: response to wounding (GO:0009611);;…	--	sp|Q39013|NAC2_ARATH NAC domain-containing protein 2 OS=Arabidopsis thaliana GN=NAC002 PE=2 SV=2	NAC domain protein GN=NAC OS=Citrus sinensis (Sweet orange) PE=2 SV=1	gi|148615629|gb|ABQ96643.1| NAC domain protein [Citrus sinensis]	Citrus sinensis NAC domain protein (NAC) mRNA, complete cds
Maple_Unigene_BMK.33342	8.24e-06	-1.95118	down	[HC]	--	Biological Process: metabolic process (GO:0008152);; Molecular Function: oxidoreductase activity, acting on paired donors, with incorporation or reduction of molecular oxygen, NADH or NADPH as one donor, and incorporation of one atom of oxygen (GO:0016709);; Biological Process: defense response to fungus (GO:0050832);;	--	sp|Q40412|ABA2_NICPL Zeaxanthin epoxidase, chloroplastic OS=Nicotiana plumbaginifolia GN=ABA2 PE=1 SV=1	Monoxygenase, putative GN=RCOM_0009590 OS=Ricinus communis (Castor bean) PE=4 SV=1	gi|255578424|ref|XP_002530077.1| monoxygenase, putative [Ricinus communis]	Ricinus communis monoxygenase, putative, mRNA
Maple_Unigene_BMK.20848	1.29e-05	-1.95054	down	[F]	Nucleotide transport and metabolism	Molecular Function: cytidylate kinase activity (GO:0004127);; Molecular Function: uridine kinase activity (GO:0004849);; Molecular Function: ATP binding (GO:0005524);; Cellular Component: nucleus (GO:0005634);; Cellular Component: cytosol (GO:0005829);; Molecular Function: uridylate kinase activity (GO:0009041);; Biological Process: pyrimidine ribonucleoside monophosphate metabolic process (GO:00…	K13800|1e-125|rcu:RCOM_0658900|UMP-CMP kinase [EC:2.7.4.- 2.7.4.14]	sp|O04905|UMPK_ARATH Uridylate kinase OS=Arabidopsis thaliana GN=PYR6 PE=1 SV=1	Uridylate kinase GN=MTR_8g009520 OS=Medicago truncatula (Barrel medic) PE=2 SV=1	gi|217075148|gb|ACJ85934.1| unknown [Medicago truncatula]	Ricinus communis uridylate kinase plant, putative, mRNA
Maple_Unigene_BMK.10180	0.00452626	-1.94604	down	--	--	--	--	sp|O10341|Y091_NPVOP Uncharacterized 29.3 kDa protein OS=Orgyia pseudotsugata multicapsid polyhedrosis virus GN=ORF92 PE=4 SV=1	Predicted protein GN=POPTRDRAFT_814116 OS=Populus trichocarpa (Western balsam poplar) PE=4 SV=1	gi|224104645|ref|XP_002313513.1| predicted protein [Populus trichocarpa]	Populus trichocarpa predicted protein, mRNA
Maple_Unigene_BMK.23846	0.00886954	-1.94577	down	[E]	Amino acid transport and metabolism	Biological Process: oligopeptide transport (GO:0006857);; Biological Process: response to nematode (GO:0009624);; Molecular Function: amino acid transmembrane transporter activity (GO:0015171);; Biological Process: amine transport (GO:0015837);; Cellular Component: membrane (GO:0016020);; Cellular Component: cytoplasmic membrane-bounded vesicle (GO:0016023);;	--	sp|Q9SRI2|PTR31_ARATH Putative peptide/nitrate transporter At3g01350 OS=Arabidopsis thaliana GN=At3g01350 PE=2 SV=1	Predicted protein GN=POPTRDRAFT_585877 OS=Populus trichocarpa (Western balsam poplar) PE=4 SV=1	gi|224116474|ref|XP_002331906.1| predicted protein [Populus trichocarpa]	Populus trichocarpa predicted protein, mRNA
Maple_Unigene_BMK.21260	0.000145844	-1.93758	down	--	--	Biological Process: very long-chain fatty acid metabolic process (GO:0000038);; Molecular Function: protein binding (GO:0005515);; Cellular Component: endoplasmic reticulum (GO:0005783);; Biological Process: fatty acid biosynthetic process (GO:0006633);; Biological Process: intra-Golgi vesicle-mediated transport (GO:0006891);; Biological Process: cellular membrane fusion (GO:0006944);; Molecular …	--	sp|Q4R4P4|FA2H_MACFA Fatty acid 2-hydroxylase OS=Macaca fascicularis GN=FA2H PE=2 SV=1	Sphingolipid fatty acid alpha hydroxylase GN=RCOM_1336080 OS=Ricinus communis (Castor bean) PE=4 SV=1	gi|255564345|ref|XP_002523169.1| sphingolipid fatty acid alpha hydroxylase [Ricinus communis]	Ricinus communis sphingolipid fatty acid alpha hydroxylase, mRNA
Maple_Unigene_BMK.35957	1.64e-05	-1.93737	down	--	--	Molecular Function: carboxylesterase activity (GO:0004091);;	--	sp|Q0ZPV7|CXE1_ACTER Carboxylesterase 1 OS=Actinidia eriantha GN=CXE1 PE=1 SV=1	Predicted protein GN=POPTRDRAFT_808220 OS=Populus trichocarpa (Western balsam poplar) PE=4 SV=1	gi|224136894|ref|XP_002322442.1| predicted protein [Populus trichocarpa]	Medicago truncatula clone MTYFD_FE_FF_FG1G-J-1 unknown mRNA
Maple_Unigene_BMK.14245	3.57e-05	-1.93653	down	[IQR]	--	Molecular Function: nucleotide binding (GO:0000166);; Molecular Function: 3-oxoacyl-[acyl-carrier-protein] reductase (NADPH) activity (GO:0004316);; Cellular Component: plastid (GO:0009536);; Molecular Function: androstan-3-alpha,17-beta-diol dehydrogenase activity (GO:0047044);; Biological Process: diterpene phytoalexin precursor biosynthetic process pathway (GO:0051504);; Biological Process: ox…	--	sp|Q7FAE1|MOMAS_ORYSJ Momilactone A synthase OS=Oryza sativa subsp. japonica GN=Os04g0179200 PE=2 SV=1	Predicted protein GN=POPTRDRAFT_666348 OS=Populus trichocarpa (Western balsam poplar) PE=3 SV=1	gi|224135649|ref|XP_002322126.1| predicted protein [Populus trichocarpa]	PREDICTED: Vitis vinifera hypothetical protein LOC100265634 (LOC100265634), mRNA
Maple_Unigene_BMK.11431	2.05e-05	-1.93575	down	--	--	--	--	--	Putative uncharacterized protein OS=Phalaenopsis aphrodite subsp. formosana (Moth orchid) PE=4 SV=1	gi|296082454|emb|CBI21459.3| unnamed protein product [Vitis vinifera]	Citrus sinensis chloroplast, complete genome
Maple_Unigene_BMK.35976	4.96e-05	-1.93484	down	[R]	General function prediction only	Molecular Function: nucleotide binding (GO:0000166);; Biological Process: mRNA splicing, via spliceosome (GO:0000398);; Molecular Function: RNA binding (GO:0003723);;	--	sp|Q76LC6|RBM24_DANRE RNA-binding protein 24 OS=Danio rerio GN=rbm24 PE=2 SV=1	Predicted protein GN=POPTRDRAFT_671061 OS=Populus trichocarpa (Western balsam poplar) PE=4 SV=1	gi|224127746|ref|XP_002329167.1| predicted protein [Populus trichocarpa]	Populus trichocarpa predicted protein, mRNA
Maple_Unigene_BMK.19459	0.000100043	-1.93103	down	[E]	Amino acid transport and metabolism	Molecular Function: sarcosine oxidase activity (GO:0008115);; Biological Process: tetrahydrofolate metabolic process (GO:0046653);; Biological Process: oxidation-reduction process (GO:0055114);;	--	sp|Q9SJA7|SOX_ARATH Probable sarcosine oxidase OS=Arabidopsis thaliana GN=At2g24580 PE=2 SV=1	Sarcosine oxidase GN=SOX1 OS=Populus trichocarpa (Western balsam poplar) PE=4 SV=1	gi|224142069|ref|XP_002324381.1| sarcosine oxidase [Populus trichocarpa]	Populus trichocarpa sarcosine oxidase (SOX2), mRNA
Maple_Unigene_BMK.36417	4.27e-05	-1.9304	down	--	--	Molecular Function: catalytic activity (GO:0003824);;	--	sp|Q9C9H7|RLP12_ARATH Receptor-like protein 12 OS=Arabidopsis thaliana GN=RLP12 PE=2 SV=1	Putative uncharacterized protein GN=VIT_12s0057g00760 OS=Vitis vinifera (Grape) PE=4 SV=1	gi|224140505|ref|XP_002323623.1| predicted protein [Populus trichocarpa]	--
Maple_Unigene_BMK.35763	1.16e-05	-1.92764	down	[E]	Amino acid transport and metabolism	Molecular Function: 5-methyltetrahydropteroyltriglutamate-homocysteine S-methyltransferase activity (GO:0003871);; Molecular Function: copper ion binding (GO:0005507);; Cellular Component: peroxisome (GO:0005777);; Cellular Component: cytosol (GO:0005829);; Cellular Component: plasma membrane (GO:0005886);; Molecular Function: zinc ion binding (GO:0008270);; Molecular Function: methionine synthas…	K00549|0.0|rcu:RCOM_1321820|5-methyltetrahydropteroyltriglutamate--homocysteine methyltransferase [EC:2.1.1.14]	sp|Q42699|METE_CATRO 5-methyltetrahydropteroyltriglutamate--homocysteine methyltransferase OS=Catharanthus roseus GN=METE PE=2 SV=1	Methionine synthase OS=Carica papaya (Papaya) PE=2 SV=1	gi|151347486|gb|ABS01352.1| methionine synthase [Carica papaya]	Carica papaya clone Cp38 methionine synthase mRNA, complete cds
Maple_Unigene_BMK.11323	0.00189806	-1.92731	down	--	--	Biological Process: lipid transport (GO:0006869);;	--	sp|Q43681|NLTP_VIGUN Probable non-specific lipid-transfer protein AKCS9 OS=Vigna unguiculata PE=2 SV=1	Putative uncharacterized protein GN=VIT_17s0000g03280 OS=Vitis vinifera (Grape) PE=4 SV=1	gi|255628557|gb|ACU14623.1| unknown [Glycine max]	Populus trichocarpa clone WS01118_A01 unknown mRNA
Maple_Unigene_BMK.30407	1.22e-05	-1.92517	down	[RTKL]	--	Cellular Component: ubiquitin ligase complex (GO:0000151);; Molecular Function: protein serine/threonine kinase activity (GO:0004674);; Molecular Function: protein tyrosine kinase activity (GO:0004713);; Molecular Function: ubiquitin-protein ligase activity (GO:0004842);; Molecular Function: receptor activity (GO:0004872);; Molecular Function: ATP binding (GO:0005524);; Biological Process: protei…	--	sp|Q9SW11|PUB35_ARATH U-box domain-containing protein 35 OS=Arabidopsis thaliana GN=PUB35 PE=1 SV=2	Putative uncharacterized protein GN=VITISV_021538 OS=Vitis vinifera (Grape) PE=3 SV=1	gi|147858097|emb|CAN78862.1| hypothetical protein VITISV_021538 [Vitis vinifera]	Ricinus communis receptor protein kinase, putative, mRNA
Maple_Unigene_BMK.11428	1.31e-05	-1.91766	down	[C]	Energy production and conversion	Molecular Function: formamidase activity (GO:0004328);; Cellular Component: vacuole (GO:0005773);; Biological Process: metabolic process (GO:0008152);; Biological Process: systemic acquired resistance (GO:0009627);; Biological Process: regulation of defense response (GO:0031347);;	K01455|0.0|pop:POPTR_818419|formamidase [EC:3.5.1.49]	sp|Q50228|FMDA_METME Formamidase OS=Methylophilus methylotrophus GN=fmdA PE=1 SV=1	Putative uncharacterized protein GN=VIT_07s0129g00310 OS=Vitis vinifera (Grape) PE=4 SV=1	gi|225438972|ref|XP_002284310.1| PREDICTED: hypothetical protein isoform 2 [Vitis vinifera]	PREDICTED: Vitis vinifera hypothetical protein LOC100250701 (LOC100250701), mRNA
Maple_Unigene_BMK.22778	0.000211963	-1.91742	down	--	--	--	--	--	Putative uncharacterized protein GN=VIT_14s0066g01890 OS=Vitis vinifera (Grape) PE=4 SV=1	gi|225452568|ref|XP_002280628.1| PREDICTED: hypothetical protein [Vitis vinifera]	--
Maple_Unigene_BMK.32539	6.41e-05	-1.91615	down	--	--	Molecular Function: copper ion binding (GO:0005507);; Molecular Function: L-ascorbate oxidase activity (GO:0008447);; Biological Process: lignin catabolic process (GO:0046274);; Cellular Component: apoplast (GO:0048046);; Molecular Function: hydroquinone:oxygen oxidoreductase activity (GO:0052716);; Biological Process: oxidation-reduction process (GO:0055114);;	--	sp|Q2QYS3|LAC23_ORYSJ Laccase-23 OS=Oryza sativa subsp. japonica GN=LAC23 PE=2 SV=1	Laccase, putative GN=RCOM_0647160 OS=Ricinus communis (Castor bean) PE=4 SV=1	gi|255567618|ref|XP_002524788.1| laccase, putative [Ricinus communis]	--
Maple_Unigene_BMK.4832	0.000307464	-1.91399	down	--	--	Cellular Component: plastid (GO:0009536);;	--	--	Putative uncharacterized protein GN=RCOM_0837580 OS=Ricinus communis (Castor bean) PE=4 SV=1	gi|255562932|ref|XP_002522471.1| conserved hypothetical protein [Ricinus communis]	Vitis vinifera contig VV78X200170.12, whole genome shotgun sequence
Maple_Unigene_BMK.33071	0.000257335	-1.91092	down	--	--	--	--	sp|Q8TGM7|ART2_YEAST Putative uncharacterized protein ART2 OS=Saccharomyces cerevisiae GN=ART2 PE=5 SV=1	Putative uncharacterized protein GN=MTR_5g051000 OS=Medicago truncatula (Barrel medic) PE=4 SV=1	gi|224144195|ref|XP_002325216.1| predicted protein [Populus trichocarpa]	Cercidiphyllum japonicum 26S ribosomal RNA gene, complete sequence
Maple_Unigene_BMK.20065	0.00169505	-1.91089	down	--	--	Cellular Component: plasma membrane (GO:0005886);; Cellular Component: plastid (GO:0009536);; Biological Process: root hair elongation (GO:0048767);;	--	--	Predicted protein GN=POPTRDRAFT_644105 OS=Populus trichocarpa (Western balsam poplar) PE=4 SV=1	gi|224063499|ref|XP_002301174.1| predicted protein [Populus trichocarpa]	Populus trichocarpa predicted protein, mRNA
Maple_Unigene_BMK.26081	1.52e-05	-1.90972	down	--	--	Cellular Component: cell wall (GO:0005618);; Biological Process: cellular process (GO:0009987);; Molecular Function: hydrolase activity, acting on ester bonds (GO:0016788);; Biological Process: regulation of metabolic process (GO:0019222);; Biological Process: response to stimulus (GO:0050896);;	--	sp|Q3E989|PME54_ARATH Probable pectinesterase/pectinesterase inhibitor 54 OS=Arabidopsis thaliana GN=PME54 PE=2 SV=1	Pectinesterase GN=RCOM_0708510 OS=Ricinus communis (Castor bean) PE=3 SV=1	gi|255550291|ref|XP_002516196.1| Pectinesterase-2 precursor, putative [Ricinus communis]	C.papaya mRNA for pectinesterase
Maple_Unigene_BMK.24941	1.47e-05	-1.90825	down	[G]	Carbohydrate transport and metabolism	Cellular Component: vacuole (GO:0005773);; Cellular Component: plasma membrane (GO:0005886);; Biological Process: water transport (GO:0006833);; Biological Process: response to osmotic stress (GO:0006970);; Biological Process: response to desiccation (GO:0009269);; Cellular Component: plasmodesma (GO:0009506);; Cellular Component: chloroplast (GO:0009507);; Biological Process: response to nematod…	--	sp|P43287|PIP22_ARATH Aquaporin PIP2-2 OS=Arabidopsis thaliana GN=PIP2-2 PE=1 SV=2	Aquaporin 2 GN=Aqp2 OS=Samanea saman (Rain tree) PE=2 SV=1	gi|3158476|gb|AAC17529.1| aquaporin 2 [Samanea saman]	Juglans regia plasma intrinsic protein 2;3 mRNA, complete cds
Maple_Unigene_BMK.14262	0.00072014	-1.90533	down	--	--	Molecular Function: microtubule motor activity (GO:0003777);; Molecular Function: ATP binding (GO:0005524);; Cellular Component: nucleus (GO:0005634);; Cellular Component: Golgi stack (GO:0005795);; Cellular Component: microtubule (GO:0005874);; Cellular Component: plasma membrane (GO:0005886);; Biological Process: microtubule-based movement (GO:0007018);; Cellular Component: plastid (GO:0009536)…	K10393|1e-70|rcu:RCOM_1053050|kinesin family member 2/24	--	Putative uncharacterized protein GN=VIT_11s0016g03960 OS=Vitis vinifera (Grape) PE=3 SV=1	gi|297738831|emb|CBI28076.3| unnamed protein product [Vitis vinifera]	Ricinus communis kif4, putative, mRNA
Maple_Unigene_BMK.29649	2.07e-05	-1.90502	down	[E]	Amino acid transport and metabolism	Molecular Function: 3-dehydroquinate dehydratase activity (GO:0003855);; Molecular Function: shikimate 3-dehydrogenase (NADP+) activity (GO:0004764);; Cellular Component: cytosol (GO:0005829);; Biological Process: amino acid transport (GO:0006865);; Cellular Component: chloroplast stroma (GO:0009570);; Biological Process: embryo development ending in seed dormancy (GO:0009793);; Biological Proces…	K13832|0.0|pop:POPTR_570919|3-dehydroquinate dehydratase / shikimate dehydrogenase [EC:4.2.1.10 1.1.1.25]	sp|Q9SQT8|DHQSD_ARATH Bifunctional 3-dehydroquinate dehydratase/shikimate dehydrogenase, chloroplastic OS=Arabidopsis thaliana GN=EMB3004 PE=1 SV=1	Dehydroquinate dehydratase/ shikimate dehydrogenase GN=DHQD2 OS=Populus trichocarpa (Western balsam poplar) PE=3 SV=1	gi|224125422|ref|XP_002319582.1| dehydroquinate dehydratase/ shikimate dehydrogenase [Populus trichocarpa]	Populus trichocarpa dehydroquinate dehydratase/ shikimate dehydrogenase (DHQD2), mRNA
Maple_Unigene_BMK.33538	0.000299754	-1.90481	down	[Q]	Secondary metabolites biosynthesis, transport and catabolism	Molecular Function: electron carrier activity (GO:0009055);; Biological Process: response to water deprivation (GO:0009414);; Biological Process: response to red or far red light (GO:0009639);; Biological Process: response to chitin (GO:0010200);; Molecular Function: (+)-abscisic acid 8'-hydroxylase activity (GO:0010295);; Molecular Function: oxygen binding (GO:0019825);; Molecular Function: heme…	K09843|1e-137|pop:POPTR_783291|(+)-abscisic acid 8'-hydroxylase [EC:1.14.13.93]	sp|Q949P1|ABAH1_ARATH Abscisic acid 8&apos;-hydroxylase 1 OS=Arabidopsis thaliana GN=CYP707A1 PE=2 SV=1	Predicted protein GN=POPTRDRAFT_783291 OS=Populus trichocarpa (Western balsam poplar) PE=3 SV=1	gi|224129948|ref|XP_002328843.1| predicted protein [Populus trichocarpa]	Prunus avium ABA 8'-hydroxylase (CYP707A1) mRNA, partial cds
Maple_Unigene_BMK.13232	1.79e-05	-1.90271	down	[GEPR]	--	Molecular Function: sugar:hydrogen symporter activity (GO:0005351);; Biological Process: carbohydrate transport (GO:0008643);; Cellular Component: integral to membrane (GO:0016021);; Molecular Function: 2-alkenal reductase [NAD(P)] activity (GO:0032440);; Biological Process: transmembrane transport (GO:0055085);; Biological Process: oxidation-reduction process (GO:0055114);;	--	sp|Q0WVE9|PLST1_ARATH Probable plastidic glucose transporter 1 OS=Arabidopsis thaliana GN=At1g05030 PE=2 SV=2	Putative uncharacterized protein GN=VIT_12s0059g01260 OS=Vitis vinifera (Grape) PE=3 SV=1	gi|225447125|ref|XP_002271129.1| PREDICTED: hypothetical protein [Vitis vinifera]	PREDICTED: Vitis vinifera hypothetical protein LOC100261947 (LOC100261947), mRNA
Maple_Unigene_BMK.21724	1.67e-05	-1.90171	down	[RTKL]	--	Molecular Function: protein serine/threonine kinase activity (GO:0004674);; Molecular Function: protein tyrosine kinase activity (GO:0004713);; Molecular Function: ATP binding (GO:0005524);; Cellular Component: nucleolus (GO:0005730);; Cellular Component: cytoplasm (GO:0005737);; Cellular Component: plasma membrane (GO:0005886);; Biological Process: protein autophosphorylation (GO:0046777);; Biol…	--	sp|Q06548|APK1A_ARATH Protein kinase APK1A, chloroplastic OS=Arabidopsis thaliana GN=APK1A PE=2 SV=1	Predicted protein GN=POPTRDRAFT_549167 OS=Populus trichocarpa (Western balsam poplar) PE=3 SV=1	gi|224059486|ref|XP_002299870.1| predicted protein [Populus trichocarpa]	Populus trichocarpa predicted protein, mRNA
Maple_Unigene_BMK.35482	1.93e-05	-1.90084	down	[RTKL]	--	Molecular Function: calmodulin-dependent protein kinase activity (GO:0004683);; Molecular Function: protein tyrosine kinase activity (GO:0004713);; Molecular Function: receptor activity (GO:0004872);; Molecular Function: ATP binding (GO:0005524);; Cellular Component: plasma membrane (GO:0005886);; Biological Process: protein phosphorylation (GO:0006468);; Biological Process: transmembrane recepto…	--	sp|Q9SKB2|SBIR1_ARATH Leucine-rich repeat receptor-like serine/threonine/tyrosine-protein kinase SOBIR1 OS=Arabidopsis thaliana GN=SOBIR1 PE=1 SV=1	Predicted protein GN=POPTRDRAFT_662077 OS=Populus trichocarpa (Western balsam poplar) PE=4 SV=1	gi|224119518|ref|XP_002318094.1| predicted protein [Populus trichocarpa]	Ricinus communis BRASSINOSTEROID INSENSITIVE 1-associated receptor kinase 1 precursor, putative, mRNA
Maple_Unigene_BMK.44697	0.000417732	-1.90071	down	--	--	Cellular Component: cytoplasmic membrane-bounded vesicle (GO:0016023);; Biological Process: metal ion transport (GO:0030001);; Molecular Function: metal ion binding (GO:0046872);;	--	sp|Q8STA9|Y5G8_ENCCU UPF0329 protein ECU05_1680/ECU11_0050 OS=Encephalitozoon cuniculi GN=ECU05_1680 PE=3 SV=1	Putative uncharacterized protein GN=VIT_16s0050g00140 OS=Vitis vinifera (Grape) PE=4 SV=1	gi|225470181|ref|XP_002268244.1| PREDICTED: similar to Os04g0533900 [Vitis vinifera]	PREDICTED: Vitis vinifera similar to Os04g0533900 (LOC100250657), mRNA
Maple_Unigene_BMK.22659	0.00477056	-1.90043	down	--	--	Molecular Function: phospholipase C activity (GO:0004629);; Biological Process: response to stress (GO:0006950);; Biological Process: signal transduction (GO:0007165);; Biological Process: response to abiotic stimulus (GO:0009628);; Biological Process: response to chemical stimulus (GO:0042221);; Cellular Component: cell part (GO:0044464);;	K05857|1e-139|pop:POPTR_752026|phospholipase C, delta [EC:3.1.4.11]	sp|Q39032|PLCD1_ARATH Phosphoinositide phospholipase C 1 OS=Arabidopsis thaliana GN=PLC1 PE=2 SV=1	Predicted protein GN=POPTRDRAFT_752026 OS=Populus trichocarpa (Western balsam poplar) PE=4 SV=1	gi|224059280|ref|XP_002299804.1| predicted protein [Populus trichocarpa]	Brassica rapa subsp. pekinensis clone KBrF056C18, complete sequence
Maple_Unigene_BMK.23040	0.00584952	-1.89808	down	--	--	Cellular Component: Golgi apparatus (GO:0005794);; Molecular Function: methyltransferase activity (GO:0008168);; Biological Process: trichoblast differentiation (GO:0010054);; Biological Process: methylation (GO:0032259);;	--	sp|O80844|PMTG_ARATH Probable methyltransferase PMT16 OS=Arabidopsis thaliana GN=At2g45750 PE=2 SV=1	ATP binding protein, putative GN=RCOM_1613790 OS=Ricinus communis (Castor bean) PE=4 SV=1	gi|255541466|ref|XP_002511797.1| ATP binding protein, putative [Ricinus communis]	Solanum lycopersicum cDNA, clone: LEFL1009AC03, HTC in leaf
Maple_Unigene_BMK.26928	2.29e-05	-1.8921	down	--	--	Biological Process: response to stress (GO:0006950);; Biological Process: aging (GO:0007568);; Biological Process: response to fungus (GO:0009620);;	--	sp|P20144|WUN1_SOLTU Wound-induced protein 1 OS=Solanum tuberosum GN=WUN1 PE=2 SV=1	Putative uncharacterized protein GN=RCOM_0688560 OS=Ricinus communis (Castor bean) PE=4 SV=1	gi|255559595|ref|XP_002520817.1| conserved hypothetical protein [Ricinus communis]	Ricinus communis conserved hypothetical protein, mRNA
Maple_Unigene_BMK.33783	0.000160928	-1.89113	down	[V]	Defense mechanisms	Biological Process: MAPK cascade (GO:0000165);; Biological Process: regulation of response to biotic stimulus (GO:0002831);; Molecular Function: protein tyrosine phosphatase activity (GO:0004725);; Molecular Function: ATP binding (GO:0005524);; Cellular Component: mitochondrion (GO:0005739);; Cellular Component: vacuolar membrane (GO:0005774);; Cellular Component: cytosol (GO:0005829);; Cellular …	--	sp|Q9XIE2|AB36G_ARATH ABC transporter G family member 36 OS=Arabidopsis thaliana GN=ABCG36 PE=1 SV=1	Putative uncharacterized protein GN=VIT_09s0002g03570 OS=Vitis vinifera (Grape) PE=4 SV=1	gi|297743196|emb|CBI36063.3| unnamed protein product [Vitis vinifera]	Populus trichocarpa ABC transporter family, pleiotropic drug resistance protein (PDR8), mRNA
Maple_Unigene_BMK.27186	3.05e-05	-1.88847	down	--	--	Molecular Function: anthranilate N-benzoyltransferase activity (GO:0047672);; Biological Process: response to karrikin (GO:0080167);;	--	sp|Q9FF86|DCR_ARATH BAHD acyltransferase DCR OS=Arabidopsis thaliana GN=DCR PE=2 SV=1	Predicted protein GN=POPTRDRAFT_576934 OS=Populus trichocarpa (Western balsam poplar) PE=4 SV=1	gi|224139040|ref|XP_002322965.1| predicted protein [Populus trichocarpa]	Ricinus communis Anthocyanin 5-aromatic acyltransferase, putative, mRNA
Maple_Unigene_BMK.35873	0.000332198	-1.886	down	[RTKL]	--	Molecular Function: nucleotide binding (GO:0000166);; Molecular Function: protein kinase activity (GO:0004672);; Biological Process: phosphorylation (GO:0016310);; Cellular Component: intracellular membrane-bounded organelle (GO:0043231);; Cellular Component: cytoplasmic part (GO:0044444);;	--	sp|Q8RWZ5|SD25_ARATH G-type lectin S-receptor-like serine/threonine-protein kinase SD2-5 OS=Arabidopsis thaliana GN=SD25 PE=1 SV=1	Kinase, putative GN=RCOM_0577550 OS=Ricinus communis (Castor bean) PE=3 SV=1	gi|255570697|ref|XP_002526303.1| kinase, putative [Ricinus communis]	Vitis vinifera, whole genome shotgun sequence, contig VV78X217952.5, clone ENTAV 115
Maple_Unigene_BMK.22996	0.00336547	-1.88587	down	--	--	--	--	--	ATP synthase subunit alpha GN=MTR_1g006010 OS=Medicago truncatula (Barrel medic) PE=3 SV=1	--	Nicotiana tabacum mitochondrial DNA, complete genome
Maple_Unigene_BMK.29471	0.00403405	-1.88317	down	--	--	Biological Process: MAPK cascade (GO:0000165);; Biological Process: regulation of response to biotic stimulus (GO:0002831);; Molecular Function: calmodulin binding (GO:0005516);; Cellular Component: Golgi apparatus (GO:0005794);; Cellular Component: plasma membrane (GO:0005886);; Biological Process: protein targeting to membrane (GO:0006612);; Cellular Component: plasmodesma (GO:0009506);; Biolog…	--	sp|Q94KB9|MLO3_ARATH MLO-like protein 3 OS=Arabidopsis thaliana GN=MLO3 PE=2 SV=1	Predicted protein GN=POPTRDRAFT_1109159 OS=Populus trichocarpa (Western balsam poplar) PE=4 SV=1	gi|224069386|ref|XP_002326345.1| predicted protein [Populus trichocarpa]	Populus trichocarpa predicted protein, mRNA
Maple_Unigene_BMK.30300	0.000226124	-1.87835	down	[R]	General function prediction only	Molecular Function: auxin:hydrogen symporter activity (GO:0009672);; Biological Process: auxin polar transport (GO:0009926);; Biological Process: proline transport (GO:0015824);; Cellular Component: integral to membrane (GO:0016021);; Biological Process: cysteine biosynthetic process (GO:0019344);; Biological Process: transmembrane transport (GO:0055085);;	--	sp|O14197|YDQ4_SCHPO Uncharacterized transporter C5D6.04 OS=Schizosaccharomyces pombe GN=SPAC5D6.04 PE=2 SV=1	Predicted protein GN=POPTRDRAFT_753848 OS=Populus trichocarpa (Western balsam poplar) PE=4 SV=1	gi|224065633|ref|XP_002301894.1| predicted protein [Populus trichocarpa]	Populus trichocarpa predicted protein, mRNA
Maple_Unigene_BMK.26080	3.12e-05	-1.87752	down	--	--	Molecular Function: enzyme inhibitor activity (GO:0004857);; Cellular Component: cell wall (GO:0005618);; Molecular Function: pectinesterase activity (GO:0030599);; Biological Process: cell wall modification (GO:0042545);; Biological Process: negative regulation of catalytic activity (GO:0043086);; Molecular Function: aspartyl esterase activity (GO:0045330);;	--	sp|Q9SRX4|PME7_ARATH Probable pectinesterase/pectinesterase inhibitor 7 OS=Arabidopsis thaliana GN=PME7 PE=2 SV=1	Pectinesterase GN=POPTRDRAFT_589355 OS=Populus trichocarpa (Western balsam poplar) PE=3 SV=1	gi|224069260|ref|XP_002326314.1| predicted protein [Populus trichocarpa]	Populus trichocarpa predicted protein, mRNA
Maple_Unigene_BMK.12260	0.00735204	-1.87345	down	--	--	Biological Process: acetyl-CoA metabolic process (GO:0006084);; Cellular Component: plastid (GO:0009536);; Biological Process: regulation of meristem growth (GO:0010075);; Biological Process: sterol biosynthetic process (GO:0016126);; Biological Process: brassinosteroid biosynthetic process (GO:0016132);; Cellular Component: anchored to membrane (GO:0031225);;	--	sp|Q9C5S0|AGP9_ARATH Classical arabinogalactan protein 9 OS=Arabidopsis thaliana GN=AGP9 PE=1 SV=2	Putative uncharacterized protein OS=Populus trichocarpa (Western balsam poplar) PE=2 SV=1	gi|224105659|ref|XP_002313891.1| predicted protein [Populus trichocarpa]	Populus trichocarpa predicted protein, mRNA
Maple_Unigene_BMK.30213	2.61e-05	-1.87304	down	--	--	Cellular Component: Golgi apparatus (GO:0005794);; Cellular Component: plasma membrane (GO:0005886);; Molecular Function: methyltransferase activity (GO:0008168);; Cellular Component: plant-type cell wall (GO:0009505);; Molecular Function: kinase activity (GO:0016301);; Biological Process: phosphorylation (GO:0016310);; Biological Process: methylation (GO:0032259);;	--	sp|B9DFI7|PMT2_ARATH Probable methyltransferase PMT2 OS=Arabidopsis thaliana GN=At1g26850 PE=1 SV=2	Putative uncharacterized protein OS=Malus domestica (Apple) PE=2 SV=1	gi|6752888|gb|AAF27920.1|AF220204_1 unknown [Malus x domestica]	Populus trichocarpa predicted protein, mRNA
Maple_Unigene_BMK.35201	7.26e-05	-1.87275	down	[T]	Signal transduction mechanisms	Molecular Function: receptor activity (GO:0004872);; Biological Process: phosphate ion transport (GO:0006817);; Cellular Component: integral to membrane (GO:0016021);; Biological Process: cellular response to phosphate starvation (GO:0016036);;	--	sp|Q9LJW0|PHO19_ARATH Phosphate transporter PHO1 homolog 9 OS=Arabidopsis thaliana GN=PHO1-H9 PE=2 SV=1	Pho1-like protein GN=POPTRDRAFT_577675 OS=Populus trichocarpa (Western balsam poplar) PE=4 SV=1	gi|224141421|ref|XP_002324071.1| pho1-like protein [Populus trichocarpa]	Ricinus communis xenotropic and polytropic murine leukemia virus receptor pho1, putative, mRNA
Maple_Unigene_BMK.21079	2.54e-05	-1.87109	down	[RTKL]	--	Molecular Function: calmodulin-dependent protein kinase activity (GO:0004683);; Molecular Function: protein tyrosine kinase activity (GO:0004713);; Molecular Function: ATP binding (GO:0005524);; Biological Process: protein phosphorylation (GO:0006468);; Biological Process: signal transduction (GO:0007165);; Biological Process: response to cold (GO:0009409);; Biological Process: response to woundi…	--	sp|Q9MAM1|CIPK9_ARATH CBL-interacting serine/threonine-protein kinase 9 OS=Arabidopsis thaliana GN=CIPK9 PE=1 SV=2	Predicted protein GN=CIPK12 OS=Populus trichocarpa (Western balsam poplar) PE=2 SV=1	gi|296088995|emb|CBI38698.3| unnamed protein product [Vitis vinifera]	Vitis vinifera CBL-interacting protein kinase 12 (CIPK12) mRNA, complete cds
Maple_Unigene_BMK.32988	2.71e-05	-1.86976	down	--	--	Biological Process: metabolic process (GO:0008152);; Molecular Function: anthocyanidin 3-O-glucosyltransferase activity (GO:0047213);; Molecular Function: trans-zeatin O-beta-D-glucosyltransferase activity (GO:0050403);; Molecular Function: cis-zeatin O-beta-D-glucosyltransferase activity (GO:0050502);;	--	sp|Q9SK82|COGT2_ARATH Cytokinin-O-glucosyltransferase 2 OS=Arabidopsis thaliana GN=UGT85A1 PE=1 SV=1	Putative uncharacterized protein GN=VIT_00s0324g00070 OS=Vitis vinifera (Grape) PE=3 SV=1	gi|225468664|ref|XP_002268845.1| PREDICTED: hypothetical protein [Vitis vinifera]	Vitis vinifera contig VV78X073525.10, whole genome shotgun sequence
Maple_Unigene_BMK.23335	3.23e-05	-1.86442	down	[V]	Defense mechanisms	Cellular Component: vacuolar membrane (GO:0005774);; Cellular Component: plasma membrane (GO:0005886);; Biological Process: drug transmembrane transport (GO:0006855);; Molecular Function: phosphoric diester hydrolase activity (GO:0008081);; Molecular Function: GTP diphosphokinase activity (GO:0008728);; Biological Process: response to water deprivation (GO:0009414);; Cellular Component: chloropla…	--	sp|Q9LYT3|TT12_ARATH Protein TRANSPARENT TESTA 12 OS=Arabidopsis thaliana GN=TT12 PE=2 SV=1	Multidrug resistance pump, putative GN=RCOM_0024820 OS=Ricinus communis (Castor bean) PE=4 SV=1	gi|255574013|ref|XP_002527924.1| multidrug resistance pump, putative [Ricinus communis]	Ricinus communis multidrug resistance pump, putative, mRNA
Maple_Unigene_BMK.34540	0.000732061	-1.85304	down	--	--	Molecular Function: protein kinase activity (GO:0004672);;	--	sp|O64793|Y1675_ARATH G-type lectin S-receptor-like serine/threonine-protein kinase At1g67520 OS=Arabidopsis thaliana GN=At1g67520 PE=2 SV=3	Receptor protein kinase, putative GN=RCOM_1494620 OS=Ricinus communis (Castor bean) PE=4 SV=1	gi|255550034|ref|XP_002516068.1| receptor protein kinase, putative [Ricinus communis]	Ricinus communis Serine/threonine-protein kinase PBS1, putative, mRNA
Maple_Unigene_BMK.27883	0.000128967	-1.84928	down	[R]	General function prediction only	Molecular Function: nucleotide binding (GO:0000166);; Cellular Component: heterotrimeric G-protein complex (GO:0005834);; Biological Process: oligopeptide transport (GO:0006857);; Biological Process: response to brassinosteroid stimulus (GO:0009741);; Molecular Function: myosin heavy chain kinase activity (GO:0016905);;	--	sp|P90648|MHCKB_DICDI Myosin heavy chain kinase B OS=Dictyostelium discoideum GN=mhkB PE=2 SV=1	F-box and wd40 domain protein, putative GN=RCOM_1083360 OS=Ricinus communis (Castor bean) PE=4 SV=1	gi|255547986|ref|XP_002515050.1| F-box and wd40 domain protein, putative [Ricinus communis]	Populus trichocarpa clone POP018-B03, complete sequence
Maple_Unigene_BMK.30979	0.000116129	-1.84921	down	--	--	--	--	--	Predicted protein GN=POPTRDRAFT_553930 OS=Populus trichocarpa (Western balsam poplar) PE=4 SV=1	gi|224074221|ref|XP_002304307.1| predicted protein [Populus trichocarpa]	Populus trichocarpa predicted protein, mRNA
Maple_Unigene_BMK.44624	0.00923771	-1.84839	down	[R]	General function prediction only	Biological Process: tryptophan biosynthetic process (GO:0000162);; Molecular Function: tryptophan synthase activity (GO:0004834);; Cellular Component: plastid (GO:0009536);; Molecular Function: pyridoxal phosphate binding (GO:0030170);; Molecular Function: protein homodimerization activity (GO:0042803);; Molecular Function: L-serine hydro-lyase (adding indole, L-tryptophan-forming) activity (GO:0…	K06001|0.0|pop:POPTR_266088|tryptophan synthase beta chain [EC:4.2.1.20]	sp|O67409|TRPB2_AQUAE Tryptophan synthase beta chain 2 OS=Aquifex aeolicus GN=trpB2 PE=3 SV=1	Predicted protein (Fragment) GN=POPTRDRAFT_266088 OS=Populus trichocarpa (Western balsam poplar) PE=3 SV=1	gi|224127344|ref|XP_002329254.1| predicted protein [Populus trichocarpa]	Populus trichocarpa predicted protein, mRNA
Maple_Unigene_BMK.25945	9.23e-05	-1.84807	down	[H]	Coenzyme transport and metabolism	Molecular Function: methionine adenosyltransferase activity (GO:0004478);; Molecular Function: copper ion binding (GO:0005507);; Molecular Function: ATP binding (GO:0005524);; Cellular Component: cytosol (GO:0005829);; Cellular Component: plasma membrane (GO:0005886);; Biological Process: S-adenosylmethionine biosynthetic process (GO:0006556);; Biological Process: polyamine catabolic process (GO:…	K00789|1e-108|rcu:RCOM_1354270|S-adenosylmethionine synthetase [EC:2.5.1.6]	sp|P50302|METK2_ACTCH S-adenosylmethionine synthase 2 OS=Actinidia chinensis GN=SAM2 PE=2 SV=1	S-adenosylmethionine synthase GN=SAMS OS=Chrysanthemum coronarium (Crown daisy) PE=2 SV=1	gi|217315773|gb|ACK37352.1| S-adenosyl-L-methionine synthetase [Chrysanthemum coronarium]	Populus trichocarpa s-adenosylmethionine synthetase 6 (AdoMet6), mRNA
Maple_Unigene_BMK.34769	6.76e-05	-1.84651	down	[A]	RNA processing and modification	Cellular Component: nucleus (GO:0005634);; Cellular Component: cytoplasm (GO:0005737);; Biological Process: protein targeting to vacuole (GO:0006623);; Molecular Function: zinc ion binding (GO:0008270);; Biological Process: vesicle-mediated transport (GO:0016192);;	--	sp|Q8BRX9|MARH3_MOUSE E3 ubiquitin-protein ligase MARCH3 OS=Mus musculus GN=March3 PE=2 SV=1	Membrane associated ring finger 1,8, putative GN=RCOM_0836410 OS=Ricinus communis (Castor bean) PE=4 SV=1	gi|255562860|ref|XP_002522435.1| membrane associated ring finger 1,8, putative [Ricinus communis]	Ricinus communis membrane associated ring finger 1,8, putative, mRNA
Maple_Unigene_BMK.21082	6.59e-05	-1.8458	down	[I]	Lipid transport and metabolism	Biological Process: metabolic process (GO:0008152);; Molecular Function: hydrolase activity (GO:0016787);;	--	sp|Q9SMN0|CXE12_ARATH Probable carboxylesterase 12 OS=Arabidopsis thaliana GN=CXE12 PE=2 SV=1	Catalytic, putative GN=RCOM_0913940 OS=Ricinus communis (Castor bean) PE=4 SV=1	gi|255552323|ref|XP_002517206.1| catalytic, putative [Ricinus communis]	TSA: Jatropha curcas Contig4361, mRNA sequence
Maple_Unigene_BMK.30734	0.000117446	-1.84267	down	--	--	Molecular Function: double-stranded RNA binding (GO:0003725);; Cellular Component: cytoplasm (GO:0005737);; Biological Process: production of ta-siRNAs involved in RNA interference (GO:0010267);; Biological Process: production of miRNAs involved in gene silencing by miRNA (GO:0035196);; Molecular Function: identical protein binding (GO:0042802);; Biological Process: defense response to virus (GO:…	--	sp|Q9SKN2|DRB2_ARATH Double-stranded RNA-binding protein 2 OS=Arabidopsis thaliana GN=DRB2 PE=1 SV=1	Putative uncharacterized protein OS=Glycine max (Soybean) PE=2 SV=1	gi|255644888|gb|ACU22944.1| unknown [Glycine max]	Ricinus communis double-stranded RNA binding protein, putative, mRNA
Maple_Unigene_BMK.23919	0.00308242	-1.841	down	[O]	Posttranslational modification, protein turnover, chaperones	Molecular Function: ATP binding (GO:0005524);; Cellular Component: mitochondrion (GO:0005739);; Cellular Component: plasma membrane (GO:0005886);; Biological Process: response to wounding (GO:0009611);; Biological Process: response to mechanical stimulus (GO:0009612);; Biological Process: systemic acquired resistance (GO:0009627);; Biological Process: salicylic acid biosynthetic process (GO:00096…	--	sp|Q54DY9|BCS1B_DICDI Probable mitochondrial chaperone BCS1-B OS=Dictyostelium discoideum GN=bcsl1b PE=3 SV=1	Cell division protease ftsH-like protein GN=MTR_5g020980 OS=Medicago truncatula (Barrel medic) PE=3 SV=1	gi|224134228|ref|XP_002327787.1| predicted protein [Populus trichocarpa]	Populus trichocarpa predicted protein, mRNA
Maple_Unigene_BMK.11643	5.57e-05	-1.83882	down	[F]	Nucleotide transport and metabolism	Molecular Function: ribonucleoside-diphosphate reductase activity, thioredoxin disulfide as acceptor (GO:0004748);; Biological Process: DNA-dependent DNA replication (GO:0006261);; Biological Process: DNA repair (GO:0006281);; Biological Process: multicellular organismal development (GO:0007275);; Biological Process: nucleotide biosynthetic process (GO:0009165);; Biological Process: deoxyribonucl…	K10808|0.0|rcu:RCOM_1677000|ribonucleoside-diphosphate reductase subunit M2 [EC:1.17.4.1]	sp|P49730|RIR2_TOBAC Ribonucleoside-diphosphate reductase small chain OS=Nicotiana tabacum PE=2 SV=1	Ribonucleoside-diphosphate reductase small chain, putative GN=RCOM_1677000 OS=Ricinus communis (Castor bean) PE=4 SV=1	gi|255536887|ref|XP_002509510.1| ribonucleoside-diphosphate reductase small chain, putative [Ricinus communis]	Populus trichocarpa predicted protein, mRNA
Maple_Unigene_BMK.27312	0.000171344	-1.83665	down	--	--	Molecular Function: aspartic-type endopeptidase activity (GO:0004190);; Cellular Component: plasma membrane (GO:0005886);; Biological Process: proteolysis (GO:0006508);; Cellular Component: plasmodesma (GO:0009506);; Biological Process: plant-type cell wall modification (GO:0009827);; Biological Process: pollen tube growth (GO:0009860);; Cellular Component: cytoplasmic membrane-bounded vesicle (G…	--	sp|Q9S9K4|ASPL2_ARATH Aspartic proteinase-like protein 2 OS=Arabidopsis thaliana GN=At1g65240 PE=1 SV=2	Aspartic proteinase Asp1, putative GN=RCOM_1077820 OS=Ricinus communis (Castor bean) PE=4 SV=1	gi|255547548|ref|XP_002514831.1| Aspartic proteinase Asp1 precursor, putative [Ricinus communis]	Ricinus communis Aspartic proteinase Asp1 precursor, putative, mRNA
Maple_Unigene_BMK.34543	4.44e-05	-1.8353	down	[RTKL]	--	Molecular Function: nucleotide binding (GO:0000166);; Molecular Function: protein serine/threonine kinase activity (GO:0004674);; Cellular Component: mitochondrion (GO:0005739);; Biological Process: phosphorylation (GO:0016310);; Molecular Function: oxidoreductase activity (GO:0016491);;	--	sp|Q8RY67|WAKLO_ARATH Wall-associated receptor kinase-like 14 OS=Arabidopsis thaliana GN=WAKL14 PE=2 SV=2	Kinase, putative GN=RCOM_0603670 OS=Ricinus communis (Castor bean) PE=3 SV=1	gi|255562745|ref|XP_002522378.1| kinase, putative [Ricinus communis]	Ricinus communis kinase, putative, mRNA
Maple_Unigene_BMK.33366	6.49e-05	-1.83514	down	[C]	Energy production and conversion	Molecular Function: magnesium ion binding (GO:0000287);; Molecular Function: inorganic diphosphatase activity (GO:0004427);; Cellular Component: nucleus (GO:0005634);; Cellular Component: cytosol (GO:0005829);; Biological Process: phosphate-containing compound metabolic process (GO:0006796);; Cellular Component: membrane (GO:0016020);; Biological Process: response to cadmium ion (GO:0046686);;	K01507|1e-107|pop:POPTR_652945|inorganic pyrophosphatase [EC:3.6.1.1]	sp|Q43187|IPYR_SOLTU Soluble inorganic pyrophosphatase OS=Solanum tuberosum GN=PPA PE=2 SV=1	Predicted protein GN=POPTRDRAFT_652945 OS=Populus trichocarpa (Western balsam poplar) PE=3 SV=1	gi|224090639|ref|XP_002309043.1| predicted protein [Populus trichocarpa]	Populus trichocarpa predicted protein, mRNA
Maple_Unigene_BMK.33812	6.22e-05	-1.82912	down	[C]	Energy production and conversion	Biological Process: respiratory burst involved in defense response (GO:0002679);; Cellular Component: mitochondrion (GO:0005739);; Cellular Component: vacuole (GO:0005773);; Cellular Component: cytosol (GO:0005829);; Cellular Component: plasma membrane (GO:0005886);; Biological Process: protein targeting to membrane (GO:0006612);; Biological Process: cellular membrane fusion (GO:0006944);; Biolog…	--	sp|Q9SVG4|RETOL_ARATH Reticuline oxidase-like protein OS=Arabidopsis thaliana GN=At4g20830 PE=1 SV=2	Reticuline oxidase, putative GN=RCOM_1335460 OS=Ricinus communis (Castor bean) PE=4 SV=1	gi|255564321|ref|XP_002523157.1| Reticuline oxidase precursor, putative [Ricinus communis]	Populus trichocarpa predicted protein, mRNA
Maple_Unigene_BMK.36436	4.82e-05	-1.82886	down	[S]	Function unknown	--	--	sp|Q9FL28|FLS2_ARATH LRR receptor-like serine/threonine-protein kinase FLS2 OS=Arabidopsis thaliana GN=FLS2 PE=1 SV=1	Predicted protein GN=POPTRDRAFT_555046 OS=Populus trichocarpa (Western balsam poplar) PE=4 SV=1	gi|224072885|ref|XP_002303927.1| predicted protein [Populus trichocarpa]	Ricinus communis serine/threonine-protein kinase bri1, putative, mRNA
Maple_Unigene_BMK.36102	0.000599338	-1.82755	down	--	--	--	--	sp|Q9PLI5|Y114_CHLMU Uncharacterized protein TC_0114 OS=Chlamydia muridarum GN=TC_0114 PE=4 SV=2	Mitochondrial protein, putative GN=MTR_1g006300 OS=Medicago truncatula (Barrel medic) PE=4 SV=1	gi|145408595|ref|YP_001152219.1| ORF58f [Pinus koraiensis]	Carica papaya mitochondrion, complete genome
Maple_Unigene_BMK.20965	0.00146423	-1.82599	down	--	--	--	--	sp|P21260|YPRO_OWEFU Uncharacterized proline-rich protein (Fragment) OS=Owenia fusiformis PE=4 SV=1	Serine-threonine protein kinase, plant-type, putative GN=RCOM_0812190 OS=Ricinus communis (Castor bean) PE=4 SV=1	gi|255555345|ref|XP_002518709.1| serine-threonine protein kinase, plant-type, putative [Ricinus communis]	Brassica rapa subsp. pekinensis clone KBrH005C21, complete sequence
Maple_Unigene_BMK.26099	7.41e-05	-1.82452	down	--	--	Molecular Function: binding (GO:0005488);; Cellular Component: nucleus (GO:0005634);; Biological Process: pollen tube growth (GO:0009860);; Biological Process: transmitting tissue development (GO:0010500);;	--	sp|Q8VWG3|TT1_ARATH Protein TRANSPARENT TESTA 1 OS=Arabidopsis thaliana GN=TT1 PE=2 SV=1	Putative uncharacterized protein GN=VIT_08s0007g08070 OS=Vitis vinifera (Grape) PE=4 SV=1	gi|225441744|ref|XP_002277537.1| PREDICTED: hypothetical protein [Vitis vinifera]	Populus trichocarpa predicted protein, mRNA
Maple_Unigene_BMK.18706	0.00622809	-1.82274	down	--	--	Molecular Function: enzyme inhibitor activity (GO:0004857);; Cellular Component: plasma membrane (GO:0005886);; Cellular Component: plant-type cell wall (GO:0009505);; Biological Process: regulation of meristem growth (GO:0010075);; Molecular Function: pectinesterase activity (GO:0030599);; Biological Process: cell wall modification (GO:0042545);; Biological Process: negative regulation of cataly…	--	sp|Q9LXD9|PME51_ARATH Probable pectinesterase/pectinesterase inhibitor 51 OS=Arabidopsis thaliana GN=PME51 PE=2 SV=1	Putative uncharacterized protein GN=VIT_04s0044g01000 OS=Vitis vinifera (Grape) PE=3 SV=1	gi|119507463|dbj|BAF42039.1| pectin methylesterase 2 [Pyrus communis]	Populus trichocarpa predicted protein, mRNA
Maple_Unigene_BMK.14304	0.0037135	-1.82264	down	--	--	--	--	--	Putative uncharacterized protein GN=VIT_16s0098g01640 OS=Vitis vinifera (Grape) PE=4 SV=1	--	--
Maple_Unigene_BMK.32736	0.000364974	-1.82021	down	--	--	Cellular Component: plasma membrane (GO:0005886);; Molecular Function: L-proline transmembrane transporter activity (GO:0015193);; Biological Process: amine transport (GO:0015837);; Cellular Component: integral to membrane (GO:0016021);; Biological Process: proline transmembrane transport (GO:0035524);; Biological Process: amino acid import (GO:0043090);;	--	sp|Q9SS86|LHTL4_ARATH Lysine histidine transporter-like 4 OS=Arabidopsis thaliana GN=At3g01760 PE=3 SV=2	Proline transporter GN=PtrProT2 OS=Populus trichocarpa (Western balsam poplar) PE=4 SV=1	gi|224112617|ref|XP_002316242.1| proline transporter [Populus trichocarpa]	Ricinus communis amino acid transporter, putative, mRNA
Maple_Unigene_BMK.28157	9.9e-05	-1.81918	down	[G]	Carbohydrate transport and metabolism	Molecular Function: trehalose-phosphatase activity (GO:0004805);; Biological Process: trehalose biosynthetic process (GO:0005992);;	--	sp|A0QKN5|OTSB_MYCA1 Trehalose-phosphate phosphatase OS=Mycobacterium avium (strain 104) GN=otsB PE=3 SV=1	Putative uncharacterized protein GN=VIT_16s0022g00660 OS=Vitis vinifera (Grape) PE=4 SV=1	gi|225466095|ref|XP_002265679.1| PREDICTED: hypothetical protein [Vitis vinifera]	Ricinus communis trehalose-6-phosphate synthase, putative, mRNA
Maple_Unigene_BMK.29520	0.000113223	-1.81842	down	--	--	Molecular Function: beta-1,4-mannosylglycoprotein 4-beta-N-acetylglucosaminyltransferase activity (GO:0003830);; Biological Process: protein N-linked glycosylation (GO:0006487);; Cellular Component: membrane (GO:0016020);;	K00737|0.0|vvi:100254142|beta-1,4-mannosyl-glycoprotein beta-1,4-N-acetylglucosaminyltransferase [EC:2.4.1.144]	sp|Q02527|MGAT3_RAT Beta-1,4-mannosyl-glycoprotein 4-beta-N-acetylglucosaminyltransferase OS=Rattus norvegicus GN=Mgat3 PE=1 SV=2	Putative uncharacterized protein GN=VIT_01s0137g00810 OS=Vitis vinifera (Grape) PE=4 SV=1	gi|225424663|ref|XP_002285541.1| PREDICTED: hypothetical protein [Vitis vinifera]	PREDICTED: Vitis vinifera hypothetical protein LOC100254142 (LOC100254142), mRNA
Maple_Unigene_BMK.34651	7.28e-05	-1.81724	down	--	--	Cellular Component: vacuole (GO:0005773);; Cellular Component: chloroplast (GO:0009507);; Biological Process: red, far-red light phototransduction (GO:0009585);; Biological Process: systemic acquired resistance (GO:0009627);; Biological Process: photomorphogenesis (GO:0009640);; Biological Process: jasmonic acid metabolic process (GO:0009694);; Biological Process: response to auxin stimulus (GO:0…	K14487|1e-133|pop:POPTR_816623|auxin responsive GH3 gene family	sp|Q6I581|GH35_ORYSJ Probable indole-3-acetic acid-amido synthetase GH3.5 OS=Oryza sativa subsp. japonica GN=GH3.5 PE=2 SV=1	Auxin-regulated protein OS=Cucumis melo subsp. melo PE=4 SV=1	gi|307136360|gb|ADN34174.1| auxin-regulated protein [Cucumis melo subsp. melo]	Populus trichocarpa GH3 family protein (GH3-12), mRNA
Maple_Unigene_BMK.23814	0.00758521	-1.81715	down	[O]	Posttranslational modification, protein turnover, chaperones	Biological Process: response to molecule of fungal origin (GO:0002238);; Molecular Function: ubiquitin-protein ligase activity (GO:0004842);; Cellular Component: plasma membrane (GO:0005886);; Biological Process: signal transduction (GO:0007165);; Biological Process: response to bacterium (GO:0009617);; Biological Process: systemic acquired resistance (GO:0009627);; Biological Process: response t…	--	sp|Q9LX93|ATL55_ARATH E3 ubiquitin-protein ligase RING1 OS=Arabidopsis thaliana GN=ATL55 PE=1 SV=1	Ring finger protein, putative GN=RCOM_0337900 OS=Ricinus communis (Castor bean) PE=4 SV=1	gi|255587015|ref|XP_002534099.1| ring finger protein, putative [Ricinus communis]	Ricinus communis ring finger protein, putative, mRNA
Maple_Unigene_BMK.26550	0.000678221	-1.81714	down	--	--	Molecular Function: sequence-specific DNA binding transcription factor activity (GO:0003700);; Biological Process: regulation of transcription, DNA-dependent (GO:0006355);; Biological Process: multicellular organismal development (GO:0007275);; Biological Process: response to chitin (GO:0010200);;	--	sp|Q9FMR3|NAC90_ARATH NAC domain-containing protein 90 OS=Arabidopsis thaliana GN=NAC090 PE=2 SV=1	NAC domain protein, IPR003441 OS=Populus trichocarpa (Western balsam poplar) PE=4 SV=1	gi|224054472|ref|XP_002298277.1| NAC domain protein, IPR003441 [Populus trichocarpa]	Ricinus communis conserved hypothetical protein, mRNA
Maple_Unigene_BMK.30052	0.00049317	-1.81544	down	--	--	Cellular Component: intracellular (GO:0005622);; Cellular Component: plasma membrane (GO:0005886);; Biological Process: protein targeting to membrane (GO:0006612);; Biological Process: response to wounding (GO:0009611);; Biological Process: response to mechanical stimulus (GO:0009612);; Biological Process: response to absence of light (GO:0009646);; Biological Process: salicylic acid mediated sig…	--	--	Predicted protein GN=POPTRDRAFT_591893 OS=Populus trichocarpa (Western balsam poplar) PE=4 SV=1	gi|224137370|ref|XP_002327109.1| predicted protein [Populus trichocarpa]	Quercus robur partial mRNA for pheromone receptor-like protein (ORF1)
Maple_Unigene_BMK.29438	0.000531078	-1.81299	down	[S]	Function unknown	Molecular Function: catalytic activity (GO:0003824);;	--	sp|O22476|BRI1_ARATH Protein BRASSINOSTEROID INSENSITIVE 1 OS=Arabidopsis thaliana GN=BRI1 PE=1 SV=1	Predicted protein GN=POPTRDRAFT_555046 OS=Populus trichocarpa (Western balsam poplar) PE=4 SV=1	gi|224072885|ref|XP_002303927.1| predicted protein [Populus trichocarpa]	Ricinus communis leucine-rich repeat receptor protein kinase exs precursor, putative, mRNA
Maple_Unigene_BMK.23241	6.33e-05	-1.81063	down	[RTKL]	--	Biological Process: MAPK cascade (GO:0000165);; Biological Process: activation of MAPK activity involved in osmosensory signaling pathway (GO:0000169);; Biological Process: response to hypoxia (GO:0001666);; Biological Process: regulation of response to biotic stimulus (GO:0002831);; Molecular Function: MAP kinase activity (GO:0004707);; Molecular Function: protein tyrosine kinase activity (GO:00…	K04371|0.0|pop:POPTR_833180|extracellular signal-regulated kinase 1/2 [EC:2.7.11.24]	sp|Q39023|MPK3_ARATH Mitogen-activated protein kinase 3 OS=Arabidopsis thaliana GN=MPK3 PE=1 SV=2	Mitogen-activated protein kinase GN=MAP OS=Citrus sinensis (Sweet orange) PE=2 SV=1	gi|122894104|gb|ABM67698.1| mitogen-activated protein kinase [Citrus sinensis]	Citrus sinensis mitogen-activated protein kinase (MAP) mRNA, complete cds
Maple_Unigene_BMK.29132	0.000126046	-1.81022	down	[Q]	Secondary metabolites biosynthesis, transport and catabolism	Molecular Function: copper ion binding (GO:0005507);; Biological Process: lignin biosynthetic process (GO:0009809);; Biological Process: lignin catabolic process (GO:0046274);; Biological Process: response to copper ion (GO:0046688);; Cellular Component: apoplast (GO:0048046);; Molecular Function: hydroquinone:oxygen oxidoreductase activity (GO:0052716);; Biological Process: oxidation-reduction p…	--	sp|Q84J37|LAC15_ARATH Laccase-15 OS=Arabidopsis thaliana GN=TT10 PE=1 SV=1	Predicted protein GN=POPTRDRAFT_863937 OS=Populus trichocarpa (Western balsam poplar) PE=4 SV=1	gi|224085288|ref|XP_002307537.1| predicted protein [Populus trichocarpa]	PREDICTED: Vitis vinifera hypothetical protein LOC100244203 (LOC100244203), mRNA
Maple_Unigene_BMK.24596	0.000671942	-1.80504	down	[S]	Function unknown	Molecular Function: catalytic activity (GO:0003824);;	--	sp|Q9C9H7|RLP12_ARATH Receptor-like protein 12 OS=Arabidopsis thaliana GN=RLP12 PE=2 SV=1	Predicted protein GN=POPTRDRAFT_555046 OS=Populus trichocarpa (Western balsam poplar) PE=4 SV=1	gi|224072885|ref|XP_002303927.1| predicted protein [Populus trichocarpa]	--
Maple_Unigene_BMK.29423	7.58e-05	-1.79885	down	[R]	General function prediction only	Molecular Function: ubiquitin-protein ligase activity (GO:0004842);; Cellular Component: plasma membrane (GO:0005886);; Molecular Function: zinc ion binding (GO:0008270);; Biological Process: cytokinin metabolic process (GO:0009690);;	--	sp|Q55874|Y103_SYNY3 Uncharacterized protein sll0103 OS=Synechocystis sp. (strain ATCC 27184 / PCC 6803 / N-1) GN=sll0103 PE=4 SV=1	Putative uncharacterized protein GN=VIT_06s0004g02630 OS=Vitis vinifera (Grape) PE=4 SV=1	gi|225435353|ref|XP_002285265.1| PREDICTED: hypothetical protein isoform 1 [Vitis vinifera]	Vitis vinifera contig VV78X277016.10, whole genome shotgun sequence
Maple_Unigene_BMK.27267	0.000366401	-1.78748	down	--	--	Biological Process: maltose metabolic process (GO:0000023);; Molecular Function: ferric-chelate reductase activity (GO:0000293);; Molecular Function: iron ion binding (GO:0005506);; Cellular Component: mitochondrion (GO:0005739);; Cellular Component: plasma membrane (GO:0005886);; Biological Process: response to bacterium (GO:0009617);; Biological Process: iron chelate transport (GO:0015688);; Ce…	--	sp|Q86GL4|NOXB_DICDI Superoxide-generating NADPH oxidase heavy chain subunit B OS=Dictyostelium discoideum GN=noxB PE=2 SV=1	Predicted protein GN=POPTRDRAFT_824700 OS=Populus trichocarpa (Western balsam poplar) PE=4 SV=1	gi|224133654|ref|XP_002321628.1| predicted protein [Populus trichocarpa]	Populus trichocarpa predicted protein, mRNA
Maple_Unigene_BMK.35770	9.23e-05	-1.78718	down	--	--	Biological Process: cytokinin metabolic process (GO:0009690);; Biological Process: leaf senescence (GO:0010150);; Biological Process: response to arsenic-containing substance (GO:0046685);; Molecular Function: cytokinin 7-beta-glucosyltransferase activity (GO:0047807);; Biological Process: seed development (GO:0048316);; Biological Process: defense response to fungus (GO:0050832);; Molecular Func…	--	sp|Q9FIA0|CNGT2_ARATH Cytokinin-N-glucosyltransferase 2 OS=Arabidopsis thaliana GN=UGT76C2 PE=1 SV=1	Putative uncharacterized protein GN=VIT_13s0019g02810 OS=Vitis vinifera (Grape) PE=4 SV=1	gi|225449296|ref|XP_002281324.1| PREDICTED: hypothetical protein [Vitis vinifera]	Populus trichocarpa clone JGIACSB09-H15, complete sequence
Maple_Unigene_BMK.20832	0.000125496	-1.78657	down	--	--	Molecular Function: DNA binding (GO:0003677);; Biological Process: transport (GO:0006810);;	--	sp|Q9ZSI7|WRK47_ARATH Probable WRKY transcription factor 47 OS=Arabidopsis thaliana GN=WRKY47 PE=2 SV=2	WRKY transcription factor, putative GN=RCOM_1343180 OS=Ricinus communis (Castor bean) PE=4 SV=1	gi|255548239|ref|XP_002515176.1| WRKY transcription factor, putative [Ricinus communis]	PREDICTED: Vitis vinifera hypothetical protein LOC100264000 (LOC100264000), mRNA
Maple_Unigene_BMK.14682	0.00769611	-1.78609	down	[Z]	Cytoskeleton	Molecular Function: ATP binding (GO:0005524);; Cellular Component: cell wall (GO:0005618);; Cellular Component: nucleus (GO:0005634);; Cellular Component: cytoplasm (GO:0005737);; Cellular Component: cytoskeleton (GO:0005856);; Cellular Component: plasma membrane (GO:0005886);; Biological Process: root hair elongation (GO:0048767);;	--	sp|O81221|ACT_GOSHI Actin OS=Gossypium hirsutum PE=3 SV=1	Actin (Fragment) OS=Liriodendron tulipifera (Tuliptree) PE=2 SV=1	gi|291463997|gb|ADE05541.1| actin [Liriodendron tulipifera]	Dimocarpus longan actin mRNA, partial cds
Maple_Unigene_BMK.28259	0.000242869	-1.78536	down	--	--	Biological Process: nitrogen compound metabolic process (GO:0006807);; Biological Process: response to nitrate (GO:0010167);; Biological Process: nitrate transport (GO:0015706);; Biological Process: sterol biosynthetic process (GO:0016126);; Biological Process: simple leaf morphogenesis (GO:0060776);;	--	sp|Q9SN23|LBD38_ARATH LOB domain-containing protein 38 OS=Arabidopsis thaliana GN=LBD38 PE=2 SV=1	LOB domain-containing protein, putative GN=RCOM_0578520 OS=Ricinus communis (Castor bean) PE=4 SV=1	gi|255568563|ref|XP_002525255.1| LOB domain-containing protein, putative [Ricinus communis]	Lotus japonicus cDNA, clone: LjFL1-012-DD04, HTC
Maple_Unigene_BMK.23610	0.00538923	-1.7852	down	--	--	--	--	--	Predicted protein GN=POPTRDRAFT_577765 OS=Populus trichocarpa (Western balsam poplar) PE=4 SV=1	gi|224141087|ref|XP_002323906.1| predicted protein [Populus trichocarpa]	Populus trichocarpa predicted protein, mRNA
Maple_Unigene_BMK.20068	0.00298196	-1.78387	down	[M]	Cell wall/membrane/envelope biogenesis	Molecular Function: protein binding (GO:0005515);; Cellular Component: nucleus (GO:0005634);; Cellular Component: mitochondrion (GO:0005739);; Cellular Component: Golgi apparatus (GO:0005794);; Cellular Component: plasma membrane (GO:0005886);; Molecular Function: cellulose synthase (UDP-forming) activity (GO:0016760);;	--	sp|Q9LJP4|CSLC4_ARATH Xyloglucan glycosyltransferase 4 OS=Arabidopsis thaliana GN=CSLC4 PE=1 SV=1	Transferase, transferring glycosyl groups, putative GN=RCOM_0851910 OS=Ricinus communis (Castor bean) PE=4 SV=1	gi|18405677|ref|NP_566835.1| ATCSLC04 (CELLULOSE-SYNTHASE LIKE C4); cellulose synthase/ transferase, transferring glycosyl groups [Arabidopsis thaliana]	Ricinus communis transferase, transferring glycosyl groups, putative, mRNA
Maple_Unigene_BMK.29091	0.000353136	-1.78253	down	--	--	Molecular Function: sequence-specific DNA binding transcription factor activity (GO:0003700);; Biological Process: response to cold (GO:0009409);; Biological Process: response to red or far red light (GO:0009639);; Biological Process: response to salt stress (GO:0009651);; Biological Process: response to ethylene stimulus (GO:0009723);; Biological Process: response to auxin stimulus (GO:0009733);…	--	sp|Q6R0H1|LHY_ARATH Protein LHY OS=Arabidopsis thaliana GN=LHY PE=1 SV=2	Late elongated hypocotyl GN=LHY OS=Castanea sativa (Sweet chestnut) PE=2 SV=1	gi|51980218|gb|AAU20773.1| late elongated hypocotyl [Castanea sativa]	Castanea sativa late elongated hypocotyl (LHY) mRNA, complete cds
Maple_Unigene_BMK.36088	0.00937977	-1.77906	down	[I]	Lipid transport and metabolism	Molecular Function: fructose-bisphosphate aldolase activity (GO:0004332);; Molecular Function: binding (GO:0005488);; Cellular Component: nucleus (GO:0005634);; Biological Process: glycolysis (GO:0006096);; Biological Process: nucleobase-containing compound metabolic process (GO:0006139);; Molecular Function: oxidoreductase activity, acting on the CH-OH group of donors, NAD or NADP as acceptor (G…	K00120|1e-161|vvi:100262718|[EC:1.1.-.-]	sp|P44979|Y1010_HAEIN Uncharacterized oxidoreductase HI_1010 OS=Haemophilus influenzae (strain ATCC 51907 / DSM 11121 / KW20 / Rd) GN=HI_1010 PE=3 SV=1	Ketose-bisphosphate aldolase class-II family protein GN=ARALYDRAFT_472044 OS=Arabidopsis lyrata subsp. lyrata (Lyre-leaved rock-cress) PE=4 SV=1	gi|297850224|ref|XP_002892993.1| ketose-bisphosphate aldolase class-II family protein [Arabidopsis lyrata subsp. lyrata]	Arabidopsis lyrata subsp. lyrata ketose-bisphosphate aldolase class-II family protein, mRNA
Maple_Unigene_BMK.19996	0.000552309	-1.77814	down	--	--	Cellular Component: plasma membrane (GO:0005886);; Biological Process: tryptophan catabolic process (GO:0006569);; Biological Process: indoleacetic acid biosynthetic process (GO:0009684);; Biological Process: response to nitrate (GO:0010167);; Biological Process: nitrate transport (GO:0015706);;	--	--	Putative uncharacterized protein GN=RCOM_0519540 OS=Ricinus communis (Castor bean) PE=4 SV=1	gi|255575740|ref|XP_002528769.1| conserved hypothetical protein [Ricinus communis]	Ricinus communis conserved hypothetical protein, mRNA
Maple_Unigene_BMK.30782	0.000106139	-1.77613	down	[G]	Carbohydrate transport and metabolism	Molecular Function: beta-galactosidase activity (GO:0004565);; Cellular Component: cytosol (GO:0005829);; Biological Process: carbohydrate metabolic process (GO:0005975);; Cellular Component: plant-type cell wall (GO:0009505);; Cellular Component: plasmodesma (GO:0009506);; Molecular Function: carbohydrate binding (GO:0030246);; Biological Process: regulation of protein localization (GO:0032880);…	--	sp|Q9SCW1|BGAL1_ARATH Beta-galactosidase 1 OS=Arabidopsis thaliana GN=BGAL1 PE=1 SV=1	Beta-galactosidase OS=Populus trichocarpa x Populus deltoides PE=2 SV=1	gi|118488890|gb|ABK96254.1| unknown [Populus trichocarpa x Populus deltoides]	Ricinus communis beta-galactosidase, putative, mRNA
Maple_Unigene_BMK.27392	0.000263189	-1.77102	down	[T]	Signal transduction mechanisms	Molecular Function: protein serine/threonine phosphatase activity (GO:0004722);; Cellular Component: nucleus (GO:0005634);; Biological Process: response to osmotic stress (GO:0006970);; Biological Process: metabolic process (GO:0008152);; Biological Process: response to cold (GO:0009409);; Cellular Component: plastid (GO:0009536);; Biological Process: response to wounding (GO:0009611);; Biologica…	--	sp|Q9XEE8|P2C30_ARATH Probable protein phosphatase 2C 30 OS=Arabidopsis thaliana GN=PP2C5 PE=2 SV=1	Predicted protein GN=POPTRDRAFT_549422 OS=Populus trichocarpa (Western balsam poplar) PE=3 SV=1	gi|224055331|ref|XP_002298484.1| predicted protein [Populus trichocarpa]	Populus trichocarpa predicted protein, mRNA
Maple_Unigene_BMK.23315	0.000358653	-1.76777	down	[T]	Signal transduction mechanisms	Biological Process: response to molecule of fungal origin (GO:0002238);; Biological Process: iron ion transport (GO:0006826);; Biological Process: cellular response to iron ion starvation (GO:0010106);; Biological Process: response to nitrate (GO:0010167);; Biological Process: nitrate transport (GO:0015706);;	--	sp|Q8LGG8|USPAL_ARATH Universal stress protein A-like protein OS=Arabidopsis thaliana GN=At3g01520 PE=1 SV=2	Predicted protein GN=POPTRDRAFT_830248 OS=Populus trichocarpa (Western balsam poplar) PE=4 SV=1	gi|224067048|ref|XP_002302337.1| predicted protein [Populus trichocarpa]	Populus trichocarpa predicted protein, mRNA
Maple_Unigene_BMK.21539	0.00407373	-1.76238	down	--	--	Molecular Function: phosphatidylinositol phospholipase C activity (GO:0004435);; Molecular Function: signal transducer activity (GO:0004871);; Molecular Function: calcium ion binding (GO:0005509);; Cellular Component: intracellular (GO:0005622);; Cellular Component: plasma membrane (GO:0005886);; Biological Process: lipid metabolic process (GO:0006629);; Biological Process: actin filament-based m…	K05857|0.0|pop:POPTR_815304|phospholipase C, delta [EC:3.1.4.11]	sp|Q944C1|PLCD4_ARATH Phosphoinositide phospholipase C 4 OS=Arabidopsis thaliana GN=PLC4 PE=2 SV=2	Predicted protein GN=POPTRDRAFT_815304 OS=Populus trichocarpa (Western balsam poplar) PE=4 SV=1	gi|224059284|ref|XP_002299806.1| predicted protein [Populus trichocarpa]	Ricinus communis 1-phosphatidylinositol-4,5-bisphosphate phosphodiesterase, putative, mRNA
Maple_Unigene_BMK.26130	0.000141156	-1.75934	down	[E]	Amino acid transport and metabolism	Molecular Function: iron ion binding (GO:0005506);; Biological Process: glutamate biosynthetic process (GO:0006537);; Biological Process: nitrogen compound metabolic process (GO:0006807);; Cellular Component: chloroplast stroma (GO:0009570);; Molecular Function: FMN binding (GO:0010181);; Molecular Function: disulfide oxidoreductase activity (GO:0015036);; Molecular Function: glutamate synthase (…	K00264|0.0|rcu:RCOM_1579610|glutamate synthase (NADPH/NADH) [EC:1.4.1.13 1.4.1.14]	sp|Q03460|GLSN_MEDSA Glutamate synthase [NADH], amyloplastic OS=Medicago sativa PE=1 SV=1	Glutamate synthase, putative GN=RCOM_1579610 OS=Ricinus communis (Castor bean) PE=4 SV=1	gi|255544986|ref|XP_002513554.1| glutamate synthase, putative [Ricinus communis]	Ricinus communis glutamate synthase, putative, mRNA
Maple_Unigene_BMK.20796	0.00248732	-1.75671	down	--	--	Cellular Component: plasma membrane (GO:0005886);; Cellular Component: chloroplast thylakoid membrane (GO:0009535);; Biological Process: response to blue light (GO:0009637);; Biological Process: photosynthesis, light harvesting (GO:0009765);; Cellular Component: chloroplast envelope (GO:0009941);; Biological Process: response to red light (GO:0010114);; Biological Process: response to far red lig…	K08913|0.0|pop:POPTR_830495|light-harvesting complex II chlorophyll a/b binding protein 2	sp|P12062|CB26_PETSP Chlorophyll a-b binding protein 37, chloroplastic OS=Petunia sp. GN=CAB37 PE=3 SV=1	Light-harvesting complex II protein Lhcb2 GN=Lhcb2-2 OS=Populus trichocarpa (Western balsam poplar) PE=2 SV=1	gi|224064850|ref|XP_002301582.1| light-harvesting complex II protein Lhcb2 [Populus trichocarpa]	G.hirsutum cab gene for chlorophyll ab binding protein
Maple_Unigene_BMK.25296	0.000140532	-1.75578	down	--	--	Cellular Component: membrane (GO:0016020);; Cellular Component: cytoplasmic membrane-bounded vesicle (GO:0016023);;	--	--	Putative uncharacterized protein GN=RCOM_0618380 OS=Ricinus communis (Castor bean) PE=4 SV=1	gi|255575888|ref|XP_002528841.1| conserved hypothetical protein [Ricinus communis]	Vitis vinifera, whole genome shotgun sequence, contig VV78X249037.7, clone ENTAV 115
Maple_Unigene_BMK.32066	0.000607856	-1.75551	down	--	--	Cellular Component: cell wall (GO:0005618);; Molecular Function: beta-glucosidase activity (GO:0008422);; Molecular Function: xylan 1,4-beta-xylosidase activity (GO:0009044);; Cellular Component: cytoplasmic membrane-bounded vesicle (GO:0016023);; Biological Process: xylan catabolic process (GO:0045493);; Cellular Component: apoplast (GO:0048046);;	--	sp|A5JTQ3|XYL2_MEDSV Beta-xylosidase/alpha-L-arabinofuranosidase 2 OS=Medicago sativa subsp. varia GN=Xyl2 PE=2 SV=1	Predicted protein (Fragment) GN=POPTRDRAFT_171426 OS=Populus trichocarpa (Western balsam poplar) PE=4 SV=1	gi|224054312|ref|XP_002298197.1| predicted protein [Populus trichocarpa]	Populus trichocarpa predicted protein, mRNA
Maple_Unigene_BMK.17701	0.000485073	-1.75376	down	[QR]	--	Molecular Function: protein binding (GO:0005515);; Cellular Component: nucleolus (GO:0005730);; Cellular Component: cytosol (GO:0005829);; Molecular Function: histone-arginine N-methyltransferase activity (GO:0008469);; Biological Process: regulation of flower development (GO:0009909);; Biological Process: histone lysine methylation (GO:0034968);; Biological Process: histone arginine methylation …	K11434|0.0|rcu:RCOM_1048110|protein arginine N-methyltransferase 1 [EC:2.1.1.-]	sp|Q9SU94|ANM11_ARATH Protein arginine N-methyltransferase 1.1 OS=Arabidopsis thaliana GN=PRMT11 PE=1 SV=1	Protein arginine n-methyltransferase 1, putative GN=RCOM_1048110 OS=Ricinus communis (Castor bean) PE=4 SV=1	gi|255546199|ref|XP_002514159.1| protein arginine n-methyltransferase 1, putative [Ricinus communis]	Populus trichocarpa arginine methyltransferease (PtrRMT902), mRNA
Maple_Unigene_BMK.35511	0.00014867	-1.75181	down	--	--	Molecular Function: protein serine/threonine kinase activity (GO:0004674);; Molecular Function: receptor activity (GO:0004872);; Molecular Function: ATP binding (GO:0005524);; Cellular Component: plasma membrane (GO:0005886);; Biological Process: signal transduction (GO:0007165);; Biological Process: multicellular organismal development (GO:0007275);; Cellular Component: plastid (GO:0009536);; Bi…	--	sp|Q9LV48|PERK1_ARATH Proline-rich receptor-like protein kinase PERK1 OS=Arabidopsis thaliana GN=PERK1 PE=1 SV=1	ATP binding protein, putative GN=RCOM_1052700 OS=Ricinus communis (Castor bean) PE=3 SV=1	gi|255546475|ref|XP_002514297.1| ATP binding protein, putative [Ricinus communis]	Ricinus communis ATP binding protein, putative, mRNA
Maple_Unigene_BMK.19695	0.000164463	-1.75125	down	[O]	Posttranslational modification, protein turnover, chaperones	Molecular Function: thioredoxin-disulfide reductase activity (GO:0004791);; Cellular Component: mitochondrial matrix (GO:0005759);; Cellular Component: cytosol (GO:0005829);; Biological Process: pollen germination (GO:0009846);; Cellular Component: chloroplast envelope (GO:0009941);; Biological Process: cell growth (GO:0016049);; Biological Process: removal of superoxide radicals (GO:0019430);; B…	K00384|0.0|ath:AT2G17420|thioredoxin reductase (NADPH) [EC:1.8.1.9]	sp|Q39242|TRXB2_ARATH Thioredoxin reductase 2 OS=Arabidopsis thaliana GN=NTR2 PE=2 SV=2	Thioredoxin reductase GN=RCOM_0612980 OS=Ricinus communis (Castor bean) PE=3 SV=1	gi|110741056|dbj|BAE98622.1| putative thioredoxin reductase [Arabidopsis thaliana]	Ricinus communis disulfide oxidoreductase, putative, mRNA
Maple_Unigene_BMK.7636	0.0055795	-1.74974	down	--	--	Cellular Component: mitochondrion (GO:0005739);; Molecular Function: transferase activity, transferring glycosyl groups (GO:0016757);;	--	--	Predicted protein GN=POPTRDRAFT_569780 OS=Populus trichocarpa (Western balsam poplar) PE=4 SV=1	gi|224118736|ref|XP_002317893.1| predicted protein [Populus trichocarpa]	Lotus japonicus genomic DNA, chromosome 4, clone: LjT06K07, TM1749, complete sequence
Maple_Unigene_BMK.23132	0.000173104	-1.74867	down	[F]	Nucleotide transport and metabolism	Molecular Function: guanylate kinase activity (GO:0004385);; Biological Process: purine nucleotide metabolic process (GO:0006163);; Biological Process: response to chitin (GO:0010200);; Biological Process: phosphorylation (GO:0016310);; Biological Process: endoplasmic reticulum unfolded protein response (GO:0030968);; Biological Process: defense response to fungus (GO:0050832);;	K00942|0.0|rcu:RCOM_0751830|guanylate kinase [EC:2.7.4.8]	sp|Q54XF2|KGUA_DICDI Guanylate kinase OS=Dictyostelium discoideum GN=guk1 PE=3 SV=1	Guanylate kinase, putative GN=RCOM_0751830 OS=Ricinus communis (Castor bean) PE=4 SV=1	gi|255577505|ref|XP_002529631.1| guanylate kinase, putative [Ricinus communis]	Ricinus communis guanylate kinase, putative, mRNA
Maple_Unigene_BMK.22997	0.00363934	-1.74855	down	--	--	Cellular Component: chloroplast (GO:0009507);;	--	--	ATP synthase subunit alpha GN=MTR_1g006010 OS=Medicago truncatula (Barrel medic) PE=3 SV=1	gi|55168340|gb|AAV44205.1| unknow protein [Oryza sativa Japonica Group]	Panax ginseng 18S ribosomal RNA gene, partial sequence; mitochondrial
Maple_Unigene_BMK.26348	0.000241684	-1.74843	down	[V]	Defense mechanisms	Biological Process: MAPK cascade (GO:0000165);; Biological Process: regulation of response to biotic stimulus (GO:0002831);; Molecular Function: protein tyrosine phosphatase activity (GO:0004725);; Molecular Function: ATP binding (GO:0005524);; Cellular Component: mitochondrion (GO:0005739);; Cellular Component: vacuolar membrane (GO:0005774);; Cellular Component: cytosol (GO:0005829);; Cellular …	--	sp|Q9XIE2|AB36G_ARATH ABC transporter G family member 36 OS=Arabidopsis thaliana GN=ABCG36 PE=1 SV=1	Putative uncharacterized protein GN=VIT_09s0002g03640 OS=Vitis vinifera (Grape) PE=4 SV=1	gi|297743203|emb|CBI36070.3| unnamed protein product [Vitis vinifera]	Ricinus communis ATP-binding cassette transporter, putative, mRNA
Maple_Unigene_BMK.22041	0.00125038	-1.74811	down	[R]	General function prediction only	Molecular Function: GTP binding (GO:0005525);; Cellular Component: vacuole (GO:0005773);; Cellular Component: plasma membrane (GO:0005886);; Biological Process: small GTPase mediated signal transduction (GO:0007264);; Biological Process: ethylene mediated signaling pathway (GO:0009873);; Biological Process: protein transport (GO:0015031);;	K07901|8e-29|zma:100273382|Ras-related protein Rab-8A	sp|Q39433|RB1BV_BETVU Ras-related protein RAB1BV OS=Beta vulgaris GN=RAB1BV PE=2 SV=1	Putative uncharacterized protein (Fragment) OS=Glycine max (Soybean) PE=2 SV=1	gi|255645965|gb|ACU23471.1| unknown [Glycine max]	Populus trichocarpa predicted protein, mRNA
Maple_Unigene_BMK.34307	0.000227668	-1.74715	down	[RTKL]	--	Molecular Function: nucleotide binding (GO:0000166);; Molecular Function: protein serine/threonine kinase activity (GO:0004674);; Biological Process: protein phosphorylation (GO:0006468);; Biological Process: cell communication (GO:0007154);; Cellular Component: membrane (GO:0016020);; Cellular Component: cytoplasmic membrane-bounded vesicle (GO:0016023);;	--	sp|Q8RWZ5|SD25_ARATH G-type lectin S-receptor-like serine/threonine-protein kinase SD2-5 OS=Arabidopsis thaliana GN=SD25 PE=1 SV=1	Predicted protein GN=POPTRDRAFT_855146 OS=Populus trichocarpa (Western balsam poplar) PE=3 SV=1	gi|224079025|ref|XP_002305722.1| predicted protein [Populus trichocarpa]	Populus trichocarpa predicted protein, mRNA
Maple_Unigene_BMK.31924	0.0001757	-1.74652	down	--	--	Biological Process: cell adhesion (GO:0007155);; Biological Process: trichome morphogenesis (GO:0010090);; Cellular Component: mediator complex (GO:0016592);; Biological Process: actin nucleation (GO:0045010);; Biological Process: root hair cell differentiation (GO:0048765);; Biological Process: cell wall organization (GO:0071555);; Biological Process: regulation of phenylpropanoid metabolic proc…	--	--	Putative uncharacterized protein GN=RCOM_0678130 OS=Ricinus communis (Castor bean) PE=4 SV=1	gi|255551487|ref|XP_002516789.1| conserved hypothetical protein [Ricinus communis]	Populus trichocarpa predicted protein, mRNA
Maple_Unigene_BMK.20723	0.000213961	-1.74617	down	[G]	Carbohydrate transport and metabolism	Cellular Component: protein storage vacuole (GO:0000326);; Cellular Component: endoplasmic reticulum (GO:0005783);; Cellular Component: plasma membrane (GO:0005886);; Biological Process: glycolysis (GO:0006096);; Biological Process: polyamine catabolic process (GO:0006598);; Biological Process: calcium ion transport (GO:0006816);; Biological Process: water transport (GO:0006833);; Biological Proc…	--	sp|P25818|TIP11_ARATH Aquaporin TIP1-1 OS=Arabidopsis thaliana GN=TIP1-1 PE=1 SV=1	Tonoplast intrinsic protein, putative GN=RCOM_1353420 OS=Ricinus communis (Castor bean) PE=3 SV=1	gi|255556846|ref|XP_002519456.1| tonoplast intrinsic protein, putative [Ricinus communis]	TSA: Jatropha curcas Contig8403, mRNA sequence
Maple_Unigene_BMK.24657	0.00322986	-1.74528	down	[C]	Energy production and conversion	Biological Process: galactose metabolic process (GO:0006012);; Molecular Function: UDP-glucose:hexose-1-phosphate uridylyltransferase activity (GO:0008108);; Molecular Function: zinc ion binding (GO:0008270);; Molecular Function: UTP:galactose-1-phosphate uridylyltransferase activity (GO:0017103);; Molecular Function: ribose-5-phosphate adenylyltransferase activity (GO:0047345);; Biological Proce…	K00965|0.0|pop:POPTR_561702|UDPglucose--hexose-1-phosphate uridylyltransferase [EC:2.7.7.12]	sp|Q9FK51|GALT_ARATH Probable galactose-1-phosphate uridyl transferase OS=Arabidopsis thaliana GN=At5g18200 PE=1 SV=1	Galactose-1-phosphate uridylyltransferase GN=POPTRDRAFT_561702 OS=Populus trichocarpa (Western balsam poplar) PE=3 SV=1	gi|224092228|ref|XP_002309518.1| predicted protein [Populus trichocarpa]	Populus trichocarpa predicted protein, mRNA
Maple_Unigene_BMK.18979	0.000449831	-1.74281	down	--	--	Biological Process: transcription, DNA-dependent (GO:0006351);;	K09286|1e-50|pop:POPTR_747254|EREBP-like factor	sp|Q40478|ERF5_TOBAC Ethylene-responsive transcription factor 5 OS=Nicotiana tabacum GN=ERF5 PE=2 SV=1	Ethylene-responsive element binding factor 6 OS=Citrus medica var. sarcodactylis PE=2 SV=1	gi|320097164|gb|ADW09319.1| ethylene-responsive element binding factor 6 [Citrus medica var. sarcodactylis]	Soybean clone JCVI-FLGm-15G18 unknown mRNA
Maple_Unigene_BMK.32603	0.00211082	-1.74219	down	--	--	--	--	--	Putative uncharacterized protein OS=Populus trichocarpa x Populus deltoides PE=2 SV=1	gi|118481694|gb|ABK92787.1| unknown [Populus trichocarpa]	--
Maple_Unigene_BMK.29919	0.0002294	-1.73465	down	[MG]	--	Cellular Component: cytosol (GO:0005829);; Biological Process: nucleotide-sugar biosynthetic process (GO:0009226);; Molecular Function: UDP-glucuronate decarboxylase activity (GO:0048040);; Cellular Component: apoplast (GO:0048046);; Molecular Function: NAD binding (GO:0051287);;	K12449|1e-158|vvi:100262362|UDP-apiose/xylose synthase	sp|Q6D2F1|ARNA_ERWCT Bifunctional polymyxin resistance protein ArnA OS=Erwinia carotovora subsp. atroseptica GN=arnA PE=3 SV=1	Putative uncharacterized protein GN=VIT_03s0017g00680 OS=Vitis vinifera (Grape) PE=4 SV=1	gi|225465764|ref|XP_002266630.1| PREDICTED: hypothetical protein [Vitis vinifera]	Gossypium hirsutum clone SpotAXS1 UDP-D-apiose/UPD-D-xylose synthetase mRNA, complete cds
Maple_Unigene_BMK.28246	0.000259869	-1.73269	down	[Z]	Cytoskeleton	Molecular Function: GTPase activity (GO:0003924);; Molecular Function: structural molecule activity (GO:0005198);; Molecular Function: GTP binding (GO:0005525);; Cellular Component: cytoplasm (GO:0005737);; Cellular Component: microtubule (GO:0005874);; Biological Process: GTP catabolic process (GO:0006184);; Biological Process: microtubule-based movement (GO:0007018);; Biological Process: protei…	--	sp|P33630|TBB1_ANEPH Tubulin beta-1 chain OS=Anemia phyllitidis GN=TUBB1 PE=2 SV=1	Putative uncharacterized protein GN=VIT_16s0050g00280 OS=Vitis vinifera (Grape) PE=4 SV=1	gi|302143867|emb|CBI22728.3| unnamed protein product [Vitis vinifera]	Gossypium hirsutum beta-tubulin 16 mRNA, complete cds
Maple_Unigene_BMK.17531	0.00182994	-1.73103	down	--	--	Cellular Component: anchored to membrane (GO:0031225);;	--	sp|Q9LUI1|LRX6_ARATH Leucine-rich repeat extensin-like protein 6 OS=Arabidopsis thaliana GN=LRX6 PE=2 SV=1	Nutrient reservoir, putative GN=RCOM_0842980 OS=Ricinus communis (Castor bean) PE=4 SV=1	gi|255570102|ref|XP_002526013.1| nutrient reservoir, putative [Ricinus communis]	--
Maple_Unigene_BMK.28617	0.000526027	-1.72656	down	--	--	--	--	--	Putative uncharacterized protein GN=VIT_12s0035g02020 OS=Vitis vinifera (Grape) PE=4 SV=1	gi|225465304|ref|XP_002271971.1| PREDICTED: hypothetical protein [Vitis vinifera]	--
Maple_Unigene_BMK.28146	0.0027106	-1.72462	down	--	--	Biological Process: defense response (GO:0006952);; Biological Process: regulation of biological process (GO:0050789);; Biological Process: response to other organism (GO:0051707);;	--	sp|Q9SAH7|WRK40_ARATH Probable WRKY transcription factor 40 OS=Arabidopsis thaliana GN=WRKY40 PE=1 SV=1	WRKY transcription factor 5 (Fragment) OS=Dimocarpus longan PE=2 SV=1	gi|224072727|ref|XP_002303852.1| predicted protein [Populus trichocarpa]	Solanum lycopersicum cDNA, clone: LEFL2007L18, HTC in fruit
Maple_Unigene_BMK.22632	0.000551658	-1.72406	down	--	--	Cellular Component: vacuole (GO:0005773);; Biological Process: signal transduction (GO:0007165);; Biological Process: chlorophyll catabolic process (GO:0015996);; Biological Process: regulation of cellular metabolic process (GO:0031323);; Biological Process: regulation of defense response (GO:0031347);; Biological Process: cellular macromolecule metabolic process (GO:0044260);; Biological Process…	--	sp|Q94LX1|CLH1_CITUN Chlorophyllase-1, chloroplastic OS=Citrus unshiu PE=2 SV=1	Chlorophyllase GN=Chlase1 OS=Citrus limon (Lemon) PE=2 SV=1	gi|30912720|sp|Q94LX1.1|CLH1_CITUN RecName: Full=Chlorophyllase-1, chloroplastic; AltName: Full=Chlorophyll-chlorophyllido hydrolase 1; Short=Chlase 1; Flags: Precursor	Populus trichocarpa predicted protein, mRNA
Maple_Unigene_BMK.24928	0.00173747	-1.7232	down	--	--	Molecular Function: DNA binding (GO:0003677);; Molecular Function: aspartic-type endopeptidase activity (GO:0004190);; Biological Process: proteolysis (GO:0006508);; Biological Process: response to chitin (GO:0010200);; Cellular Component: cytoplasmic membrane-bounded vesicle (GO:0016023);; Biological Process: defense response to fungus (GO:0050832);;	--	sp|Q766C2|NEP2_NEPGR Aspartic proteinase nepenthesin-2 OS=Nepenthes gracilis GN=nep2 PE=1 SV=1	Basic 7S globulin 2 small subunit, putative GN=RCOM_1192560 OS=Ricinus communis (Castor bean) PE=3 SV=1	gi|255558694|ref|XP_002520371.1| basic 7S globulin 2 precursor small subunit, putative [Ricinus communis]	Ricinus communis basic 7S globulin 2 precursor small subunit, putative, mRNA
Maple_Unigene_BMK.24782	0.00173747	-1.7232	down	--	--	Cellular Component: mitochondrion (GO:0005739);; Cellular Component: membrane (GO:0016020);;	--	sp|O59729|SLPI_SCHPO Uncharacterized protein slp1 OS=Schizosaccharomyces pombe GN=slp1 PE=2 SV=1	Putative uncharacterized protein GN=RCOM_1044140 OS=Ricinus communis (Castor bean) PE=4 SV=1	gi|255564940|ref|XP_002523463.1| conserved hypothetical protein [Ricinus communis]	PREDICTED: Vitis vinifera hypothetical protein LOC100249908 (LOC100249908), mRNA
Maple_Unigene_BMK.14346	0.000453262	-1.7205	down	[GEPR]	--	Cellular Component: integral to plasma membrane (GO:0005887);; Molecular Function: sucrose:hydrogen symporter activity (GO:0008506);; Biological Process: phloem sucrose loading (GO:0009915);; Biological Process: transmembrane transport (GO:0055085);;	--	sp|Q39231|SUC2_ARATH Sucrose transport protein SUC2 OS=Arabidopsis thaliana GN=SUC2 PE=1 SV=2	Sucrose proton symporter (Fragment) GN=POPTRDRAFT_249755 OS=Populus trichocarpa (Western balsam poplar) PE=4 SV=1	gi|224146425|ref|XP_002326003.1| sucrose proton symporter [Populus trichocarpa]	Daucus carota sut2 gene for sucrose/proton symporter, exons 1-4
Maple_Unigene_BMK.14258	0.000251057	-1.71895	down	--	--	Biological Process: polysaccharide biosynthetic process (GO:0000271);; Biological Process: tryptophan catabolic process (GO:0006569);; Cellular Component: plant-type cell wall (GO:0009505);; Biological Process: indoleacetic acid biosynthetic process (GO:0009684);; Biological Process: response to abscisic acid stimulus (GO:0009737);; Biological Process: response to gibberellin stimulus (GO:0009739…	--	sp|P46689|GASA1_ARATH Gibberellin-regulated protein 1 OS=Arabidopsis thaliana GN=GASA1 PE=1 SV=2	GAST-like protein OS=Litchi chinensis (Lychee) PE=4 SV=1	gi|192764522|gb|ACF05805.1| GAST-like protein [Litchi chinensis]	Litchi chinensis GAST-like protein mRNA, complete cds
Maple_Unigene_BMK.24932	0.00101277	-1.71796	down	--	--	Biological Process: autophagy (GO:0006914);; Cellular Component: plasmodesma (GO:0009506);; Biological Process: defense response to bacterium (GO:0042742);;	--	sp|Q9ZU94|CRR12_ARATH Cysteine-rich repeat secretory protein 12 OS=Arabidopsis thaliana GN=CRRSP12 PE=2 SV=2	DUF26 domain-containing protein 1, putative GN=RCOM_0597560 OS=Ricinus communis (Castor bean) PE=4 SV=1	gi|255570037|ref|XP_002525981.1| DUF26 domain-containing protein 1 precursor, putative [Ricinus communis]	PREDICTED: Vitis vinifera hypothetical protein LOC100247591 (LOC100247591), mRNA
Maple_Unigene_BMK.18980	0.00387286	-1.7146	down	--	--	Biological Process: regulation of transcription, DNA-dependent (GO:0006355);; Biological Process: response to stress (GO:0006950);; Biological Process: response to organic substance (GO:0010033);;	K09286|7e-35|pop:POPTR_747254|EREBP-like factor	sp|Q8VZ91|EF103_ARATH Ethylene-responsive transcription factor 6 OS=Arabidopsis thaliana GN=ERF6 PE=2 SV=2	Ethylene-responsive element binding factor 6 OS=Citrus medica var. sarcodactylis PE=2 SV=1	gi|320097164|gb|ADW09319.1| ethylene-responsive element binding factor 6 [Citrus medica var. sarcodactylis]	Citrus medica var. sarcodactylis ethylene-responsive element binding factor 6 mRNA, complete cds
Maple_Unigene_BMK.20515	0.00310772	-1.71192	down	--	--	Molecular Function: oxidoreductase activity (GO:0016491);;	--	sp|Q9FN69|GL3_ARATH Transcription factor GLABRA 3 OS=Arabidopsis thaliana GN=GL3 PE=1 SV=1	MYC2 OS=Citrus sinensis (Sweet orange) PE=4 SV=1	gi|150416421|gb|ABR68793.1| MYC2 [Citrus sinensis]	Citrus sinensis cultivar Valencia MYC2 gene, complete cds
Maple_Unigene_BMK.30585	0.000624772	-1.71167	down	--	--	Biological Process: polysaccharide catabolic process (GO:0000272);; Biological Process: starch metabolic process (GO:0005982);; Biological Process: cell adhesion (GO:0007155);; Molecular Function: phosphoric diester hydrolase activity (GO:0008081);; Cellular Component: plasmodesma (GO:0009506);; Biological Process: plant-type cell wall biogenesis (GO:0009832);; Biological Process: regulation of m…	--	sp|Q9SZ11|GLPQ2_ARATH Probable glycerophosphoryl diester phosphodiesterase 2 OS=Arabidopsis thaliana GN=GPDL2 PE=1 SV=2	Predicted protein GN=POPTRDRAFT_672907 OS=Populus trichocarpa (Western balsam poplar) PE=4 SV=1	gi|224163646|ref|XP_002338580.1| predicted protein [Populus trichocarpa]	--
Maple_Unigene_BMK.27837	0.000320625	-1.70727	down	--	--	Cellular Component: extracellular region (GO:0005576);; Biological Process: syncytium formation (GO:0006949);; Cellular Component: plant-type cell wall (GO:0009505);; Biological Process: plant-type cell wall organization (GO:0009664);; Biological Process: response to red light (GO:0010114);; Biological Process: regulation of stomatal movement (GO:0010119);; Cellular Component: membrane (GO:001602…	--	sp|Q9C554|EXPA1_ARATH Expansin-A1 OS=Arabidopsis thaliana GN=EXPA1 PE=2 SV=1	Expansin (Fragment) GN=MdEXPA4 OS=Malus domestica (Apple) PE=2 SV=1	gi|37951207|dbj|BAD00012.1| expansin [Malus x domestica]	Dimocarpus longan expansin 2 (Exp2) mRNA, complete cds
Maple_Unigene_BMK.35769	0.000535768	-1.70483	down	--	--	Biological Process: DNA repair (GO:0006281);; Biological Process: DNA recombination (GO:0006310);; Biological Process: leaf senescence (GO:0010150);; Biological Process: response to arsenic-containing substance (GO:0046685);; Molecular Function: anthocyanidin 3-O-glucosyltransferase activity (GO:0047213);; Molecular Function: cytokinin 7-beta-glucosyltransferase activity (GO:0047807);; Biological…	--	sp|Q9FI99|CNGT1_ARATH Cytokinin-N-glucosyltransferase 1 OS=Arabidopsis thaliana GN=UGT76C1 PE=1 SV=1	Putative uncharacterized protein GN=VIT_13s0019g02810 OS=Vitis vinifera (Grape) PE=4 SV=1	gi|296086138|emb|CBI31579.3| unnamed protein product [Vitis vinifera]	PREDICTED: Vitis vinifera hypothetical protein LOC100254764 (LOC100254764), mRNA
Maple_Unigene_BMK.12295	0.000464345	-1.70268	down	[I]	Lipid transport and metabolism	Biological Process: lipid metabolic process (GO:0006629);; Molecular Function: oxidoreductase activity, acting on paired donors, with oxidation of a pair of donors resulting in the reduction of molecular oxygen to two molecules of water (GO:0016717);; Molecular Function: delta12-fatty acid dehydrogenase activity (GO:0016720);; Molecular Function: omega-6 fatty acid desaturase activity (GO:0045485…	K10256|0.0|rcu:RCOM_0503360|omega-6 fatty acid desaturase (delta-12 desaturase) [EC:1.14.19.-]	sp|P48631|FD6E2_SOYBN Omega-6 fatty acid desaturase, endoplasmic reticulum isozyme 2 OS=Glycine max GN=FAD2-2 PE=2 SV=1	Delta 12 oleic acid desaturase FAD2 OS=Vernicia fordii (Tung) PE=2 SV=1	gi|27261181|gb|AAN87573.1| delta 12 oleic acid desaturase FAD2 [Vernicia fordii]	Vernicia fordii delta 12 oleic acid desaturase FAD2 mRNA, complete cds
Maple_Unigene_BMK.29263	0.00102587	-1.70009	down	[G]	Carbohydrate transport and metabolism	Molecular Function: beta-galactosidase activity (GO:0004565);; Biological Process: carbohydrate metabolic process (GO:0005975);; Biological Process: acetyl-CoA metabolic process (GO:0006084);; Biological Process: sterol biosynthetic process (GO:0016126);; Biological Process: brassinosteroid biosynthetic process (GO:0016132);; Molecular Function: carbohydrate binding (GO:0030246);; Molecular Funct…	--	sp|Q9MAJ7|BGAL5_ARATH Beta-galactosidase 5 OS=Arabidopsis thaliana GN=BGAL5 PE=2 SV=1	Beta-galactosidase GN=RCOM_1595960 OS=Ricinus communis (Castor bean) PE=3 SV=1	gi|255538780|ref|XP_002510455.1| beta-galactosidase, putative [Ricinus communis]	Populus trichocarpa predicted protein, mRNA
Maple_Unigene_BMK.28260	0.000431458	-1.70005	down	--	--	Biological Process: metabolic process (GO:0008152);;	--	sp|Q9SN23|LBD38_ARATH LOB domain-containing protein 38 OS=Arabidopsis thaliana GN=LBD38 PE=2 SV=1	LOB domain-containing protein, putative GN=RCOM_0578520 OS=Ricinus communis (Castor bean) PE=4 SV=1	gi|255568563|ref|XP_002525255.1| LOB domain-containing protein, putative [Ricinus communis]	Medicago truncatula chromosome 2 BAC clone mth2-18d17, complete sequence
Maple_Unigene_BMK.29039	0.00794347	-1.69532	down	--	--	--	--	--	Putative uncharacterized protein GN=VITISV_013736 OS=Vitis vinifera (Grape) PE=3 SV=1	gi|147826488|emb|CAN66212.1| hypothetical protein VITISV_013736 [Vitis vinifera]	Populus trichocarpa clone POP103-G02, complete sequence
Maple_Unigene_BMK.31611	0.00453508	-1.69324	down	[U]	Intracellular trafficking, secretion, and vesicular transport	--	--	sp|Q9S7V4|HA22A_ARATH HVA22-like protein a OS=Arabidopsis thaliana GN=HVA22A PE=2 SV=1	Putative uncharacterized protein GN=VIT_03s0132g00040 OS=Vitis vinifera (Grape) PE=4 SV=1	gi|296088794|emb|CBI38244.3| unnamed protein product [Vitis vinifera]	Vitis vinifera contig VV78X253581.15, whole genome shotgun sequence
Maple_Unigene_BMK.19033	0.00036706	-1.69204	down	--	--	Molecular Function: dicarboxylic acid transmembrane transporter activity (GO:0005310);; Cellular Component: mitochondrial inner membrane (GO:0005743);; Biological Process: dicarboxylic acid transport (GO:0006835);; Biological Process: mitochondrial transport (GO:0006839);; Biological Process: response to chitin (GO:0010200);; Cellular Component: integral to membrane (GO:0016021);; Biological Proc…	--	sp|Q54PY7|M2OM_DICDI Probable mitochondrial 2-oxoglutarate/malate carrier protein OS=Dictyostelium discoideum GN=ucpC PE=3 SV=1	Putative uncharacterized protein OS=Vitis vinifera (Grape) PE=3 SV=1	gi|225469774|ref|XP_002274117.1| PREDICTED: hypothetical protein [Vitis vinifera]	Ricinus communis mitochondrial dicarboxylate carrier protein, putative, mRNA
Maple_Unigene_BMK.26125	0.00296185	-1.69183	down	--	--	Molecular Function: peroxidase activity (GO:0004601);; Molecular Function: protein binding (GO:0005515);; Cellular Component: cell wall (GO:0005618);; Cellular Component: Golgi apparatus (GO:0005794);; Cellular Component: cytosol (GO:0005829);; Molecular Function: heme binding (GO:0020037);; Biological Process: hydrogen peroxide catabolic process (GO:0042744);; Cellular Component: apoplast (GO:00…	K00430|1e-111|vvi:100257059|peroxidase [EC:1.11.1.7]	sp|Q9FLC0|PER52_ARATH Peroxidase 52 OS=Arabidopsis thaliana GN=PER52 PE=2 SV=1	Peroxidase GN=POD OS=Capsicum annuum (Bell pepper) PE=2 SV=1	gi|222159967|gb|ACM47317.1| peroxidase [Capsicum annuum]	Gossypium hirsutum class III peroxidase (pod7) mRNA, complete cds
Maple_Unigene_BMK.28749	0.000639985	-1.69165	down	--	--	Molecular Function: ubiquitin-protein ligase activity (GO:0004842);; Molecular Function: protein binding (GO:0005515);; Cellular Component: nucleus (GO:0005634);; Biological Process: ubiquitin-dependent protein catabolic process (GO:0006511);; Biological Process: response to auxin stimulus (GO:0009733);; Biological Process: negative regulation of ethylene mediated signaling pathway (GO:0010105);;…	K14515|0.0|pop:POPTR_561896|EIN3-binding F-box protein	sp|Q9SKK0|EBF1_ARATH EIN3-binding F-box protein 1 OS=Arabidopsis thaliana GN=EBF1 PE=1 SV=1	Ein3-binding f-box protein 3 GN=EBF3 OS=Populus trichocarpa (Western balsam poplar) PE=4 SV=1	gi|224089259|ref|XP_002308665.1| ein3-binding f-box protein 3 [Populus trichocarpa]	Populus trichocarpa ein3-binding f-box protein 3 (EBF3), mRNA
Maple_Unigene_BMK.36103	0.00331165	-1.68603	down	--	--	--	--	--	Mitochondrial protein, putative GN=MTR_1g006300 OS=Medicago truncatula (Barrel medic) PE=4 SV=1	gi|224122946|ref|XP_002330403.1| predicted protein [Populus trichocarpa]	Phyllostachys edulis clone 00077 genomic sequence
Maple_Unigene_BMK.26070	0.00100321	-1.68534	down	[R]	General function prediction only	Cellular Component: endoplasmic reticulum (GO:0005783);; Cellular Component: plasma membrane (GO:0005886);;	--	sp|Q6AWW5|Y5262_ARATH Ankyrin repeat-containing protein At5g02620 OS=Arabidopsis thaliana GN=At5g02620 PE=1 SV=1	Predicted protein GN=POPTRDRAFT_760039 OS=Populus trichocarpa (Western balsam poplar) PE=4 SV=1	gi|224081056|ref|XP_002306279.1| predicted protein [Populus trichocarpa]	Populus trichocarpa predicted protein, mRNA
Maple_Unigene_BMK.12995	0.000640449	-1.68281	down	--	--	--	--	sp|P75330|P30_MYCPN P30 adhesin OS=Mycoplasma pneumoniae GN=p30 PE=4 SV=1	Putative uncharacterized protein GN=RCOM_0790500 OS=Ricinus communis (Castor bean) PE=4 SV=1	gi|255569926|ref|XP_002525926.1| conserved hypothetical protein [Ricinus communis]	Populus trichocarpa predicted protein, mRNA
Maple_Unigene_BMK.22173	0.00106307	-1.68204	down	[T]	Signal transduction mechanisms	Molecular Function: two-component sensor activity (GO:0000155);; Molecular Function: two-component response regulator activity (GO:0000156);; Molecular Function: ATP binding (GO:0005524);; Cellular Component: endoplasmic reticulum membrane (GO:0005789);; Biological Process: regulation of transcription, DNA-dependent (GO:0006355);; Biological Process: ethylene mediated signaling pathway (GO:000987…	K14509|0.0|pop:POPTR_566121|ethylene receptor [EC:2.7.13.-]	sp|Q0WPQ2|ETR2_ARATH Ethylene receptor 2 OS=Arabidopsis thaliana GN=ETR2 PE=1 SV=1	Ethylene response 2 GN=ETR2 OS=Citrus hybrid cultivar PE=2 SV=1	gi|283520944|gb|ADB25214.1| ethylene response 2 [Citrus sinensis]	Citrus hybrid cultivar ethylene response 2 (ETR2) mRNA, complete cds
Maple_Unigene_BMK.15518	0.00523609	-1.67931	down	--	--	--	--	--	Predicted protein GN=POPTRDRAFT_549973 OS=Populus trichocarpa (Western balsam poplar) PE=2 SV=1	gi|224060684|ref|XP_002300253.1| predicted protein [Populus trichocarpa]	--
Maple_Unigene_BMK.19358	0.000605478	-1.67208	down	[H]	Coenzyme transport and metabolism	Molecular Function: methyltransferase activity (GO:0008168);; Molecular Function: ribonuclease inhibitor activity (GO:0008428);; Biological Process: methylation (GO:0032259);; Biological Process: regulation of RNA metabolic process (GO:0051252);;	K02553|9e-92|rcu:RCOM_0364170|regulator of ribonuclease activity A	sp|Q9FH13|RRAA3_ARATH Regulator of ribonuclease-like protein 3 OS=Arabidopsis thaliana GN=At5g56260 PE=2 SV=1	Regulator of ribonuclease activity A, putative GN=RCOM_0364170 OS=Ricinus communis (Castor bean) PE=3 SV=1	gi|255576633|ref|XP_002529206.1| Regulator of ribonuclease activity A, putative [Ricinus communis]	Vitis vinifera contig VV78X163375.15, whole genome shotgun sequence
Maple_Unigene_BMK.30344	0.000480627	-1.67161	down	--	--	Cellular Component: plasma membrane (GO:0005886);; Molecular Function: ligase activity (GO:0016874);;	--	sp|Q9SNC6|PUB13_ARATH U-box domain-containing protein 13 OS=Arabidopsis thaliana GN=PUB13 PE=1 SV=1	Predicted protein GN=POPTRDRAFT_558578 OS=Populus trichocarpa (Western balsam poplar) PE=4 SV=1	gi|224083759|ref|XP_002307113.1| predicted protein [Populus trichocarpa]	Ricinus communis ubiquitin-protein ligase, putative, mRNA
Maple_Unigene_BMK.28356	0.00228649	-1.67155	down	[RTKL]	--	Molecular Function: protein serine/threonine kinase activity (GO:0004674);; Molecular Function: non-membrane spanning protein tyrosine kinase activity (GO:0004715);; Molecular Function: ATP binding (GO:0005524);; Cellular Component: plasma membrane (GO:0005886);; Biological Process: protein phosphorylation (GO:0006468);; Biological Process: cellular response to nitrogen starvation (GO:0006995);; …	--	sp|P27450|CX32_ARATH Probable serine/threonine-protein kinase Cx32, chloroplastic OS=Arabidopsis thaliana GN=At4g35600 PE=1 SV=2	Serine/threonine-protein kinase cx32, putative GN=RCOM_0513180 OS=Ricinus communis (Castor bean) PE=3 SV=1	gi|255572432|ref|XP_002527153.1| serine/threonine-protein kinase cx32, putative [Ricinus communis]	Ricinus communis serine/threonine-protein kinase cx32, putative, mRNA
Maple_Unigene_BMK.35762	0.000531524	-1.66907	down	[E]	Amino acid transport and metabolism	Molecular Function: 5-methyltetrahydropteroyltriglutamate-homocysteine S-methyltransferase activity (GO:0003871);; Molecular Function: copper ion binding (GO:0005507);; Cellular Component: peroxisome (GO:0005777);; Cellular Component: cytosol (GO:0005829);; Cellular Component: plasma membrane (GO:0005886);; Molecular Function: zinc ion binding (GO:0008270);; Molecular Function: methionine synthas…	K00549|1e-146|vvi:100248500|5-methyltetrahydropteroyltriglutamate--homocysteine methyltransferase [EC:2.1.1.14]	sp|Q42662|METE_SOLSC 5-methyltetrahydropteroyltriglutamate--homocysteine methyltransferase OS=Solenostemon scutellarioides GN=MET PE=1 SV=2	Methionine synthase (Fragment) OS=Coffea arabica (Arabian coffee) PE=2 SV=1	gi|6716760|gb|AAF26735.1| methionine synthase [Coffea arabica]	PREDICTED: Vitis vinifera hypothetical protein LOC100248500 (LOC100248500), mRNA
Maple_Unigene_BMK.33242	0.00345692	-1.66901	down	--	--	Cellular Component: intracellular (GO:0005622);; Biological Process: regulation of transcription, DNA-dependent (GO:0006355);; Biological Process: defense response (GO:0006952);; Biological Process: signal transduction (GO:0007165);; Molecular Function: zinc ion binding (GO:0008270);; Biological Process: response to gibberellin stimulus (GO:0009739);; Biological Process: post-embryonic developmen…	--	sp|Q39264|ZFP5_ARATH Zinc finger protein 5 OS=Arabidopsis thaliana GN=ZFP5 PE=2 SV=1	Nucleic acid binding protein, putative GN=RCOM_0042390 OS=Ricinus communis (Castor bean) PE=4 SV=1	gi|255580708|ref|XP_002531176.1| nucleic acid binding protein, putative [Ricinus communis]	Vitis vinifera contig VV78X028183.5, whole genome shotgun sequence
Maple_Unigene_BMK.29090	0.00236673	-1.66274	down	[R]	General function prediction only	Molecular Function: DNA binding (GO:0003677);; Biological Process: regulation of transcription, DNA-dependent (GO:0006355);; Biological Process: response to stress (GO:0006950);; Biological Process: response to light stimulus (GO:0009416);; Biological Process: response to hormone stimulus (GO:0009725);; Biological Process: regulation of circadian rhythm (GO:0042752);;	--	sp|Q6R0H1|LHY_ARATH Protein LHY OS=Arabidopsis thaliana GN=LHY PE=1 SV=2	Late elongated hypocotyl GN=LHY OS=Castanea sativa (Sweet chestnut) PE=2 SV=1	gi|51980218|gb|AAU20773.1| late elongated hypocotyl [Castanea sativa]	Populus nigra PnLHY2 mRNA for transcription factor LHY, complete cds
Maple_Unigene_BMK.33365	0.000941975	-1.66014	down	--	--	--	--	--	Predicted protein GN=POPTRDRAFT_814906 OS=Populus trichocarpa (Western balsam poplar) PE=4 SV=1	gi|224053517|ref|XP_002297852.1| predicted protein [Populus trichocarpa]	Populus trichocarpa predicted protein, mRNA
Maple_Unigene_BMK.31454	0.000538664	-1.65982	down	--	--	Molecular Function: DNA binding (GO:0003677);;	--	sp|Q93WT0|WRK31_ARATH Probable WRKY transcription factor 31 OS=Arabidopsis thaliana GN=WRKY31 PE=2 SV=1	WRKY transcription factor, putative GN=RCOM_0903720 OS=Ricinus communis (Castor bean) PE=4 SV=1	gi|255554813|ref|XP_002518444.1| WRKY transcription factor, putative [Ricinus communis]	Populus trichocarpa predicted protein, mRNA
Maple_Unigene_BMK.30602	0.00103894	-1.6564	down	[S]	Function unknown	Biological Process: response to molecule of bacterial origin (GO:0002237);; Molecular Function: protein serine/threonine kinase activity (GO:0004674);; Molecular Function: receptor activity (GO:0004872);; Molecular Function: ATP binding (GO:0005524);; Cellular Component: plasma membrane (GO:0005886);; Biological Process: N-terminal protein myristoylation (GO:0006499);; Biological Process: protein…	--	sp|Q9LJM4|IKU2_ARATH Receptor-like protein kinase HAIKU2 OS=Arabidopsis thaliana GN=IKU2 PE=1 SV=1	Predicted protein GN=POPTRDRAFT_1087454 OS=Populus trichocarpa (Western balsam poplar) PE=3 SV=1	gi|224105823|ref|XP_002313944.1| predicted protein [Populus trichocarpa]	Populus trichocarpa predicted protein, mRNA
Maple_Unigene_BMK.30733	0.000572283	-1.65595	down	--	--	--	K13456|1e-109|pop:POPTR_709976|RPM1-interacting protein 4	sp|Q8GYN5|RIN4_ARATH RPM1-interacting protein 4 OS=Arabidopsis thaliana GN=RIN4 PE=1 SV=1	Predicted protein GN=POPTRDRAFT_709976 OS=Populus trichocarpa (Western balsam poplar) PE=4 SV=1	gi|224065399|ref|XP_002301798.1| predicted protein [Populus trichocarpa]	TSA: Jatropha curcas Contig10037, mRNA sequence
Maple_Unigene_BMK.21821	0.00060063	-1.65456	down	[M]	Cell wall/membrane/envelope biogenesis	--	--	sp|Q9T0K5|LRX3_ARATH Leucine-rich repeat extensin-like protein 3 OS=Arabidopsis thaliana GN=LRX3 PE=1 SV=1	Metal ion binding protein, putative GN=RCOM_0473020 OS=Ricinus communis (Castor bean) PE=4 SV=1	gi|255565413|ref|XP_002523697.1| metal ion binding protein, putative [Ricinus communis]	Ricinus communis metal ion binding protein, putative, mRNA
Maple_Unigene_BMK.19995	0.00935084	-1.6545	down	--	--	Cellular Component: plasma membrane (GO:0005886);; Biological Process: tryptophan catabolic process (GO:0006569);; Biological Process: indoleacetic acid biosynthetic process (GO:0009684);; Biological Process: response to nitrate (GO:0010167);; Biological Process: nitrate transport (GO:0015706);;	--	--	Putative uncharacterized protein GN=RCOM_0519540 OS=Ricinus communis (Castor bean) PE=4 SV=1	gi|255575740|ref|XP_002528769.1| conserved hypothetical protein [Ricinus communis]	Ricinus communis conserved hypothetical protein, mRNA
Maple_Unigene_BMK.36364	0.00697799	-1.65104	down	[S]	Function unknown	Molecular Function: catalytic activity (GO:0003824);;	--	sp|Q9LHP4|RCH2_ARATH Receptor-like protein kinase 2 OS=Arabidopsis thaliana GN=RCH2 PE=1 SV=1	Serine-threonine protein kinase, plant-type, putative GN=RCOM_1452230 OS=Ricinus communis (Castor bean) PE=4 SV=1	gi|255543959|ref|XP_002513042.1| serine-threonine protein kinase, plant-type, putative [Ricinus communis]	--
[truncated: 369 more rows]

## Sheet: S2
Table S2. Distribution of small RNAs among different samples
Type	Number	Percentage	Number	Percentage
mapped	1630672	0.1279	1374966	0.1252
rRNA	2861211	0.2244	2104734	0.1917
scRNA	2	0	1	0
snRNA	1597	0.0001	1190	0.0001
snoRNA	386	0	469	0
tRNA	155894	0.0122	116736	0.0106
repbase	9044	0.0007	6542	0.0006
other	8091338	0.6346	7373257	0.6716
clean_reads	12750144	1	10977895	1

## Sheet: S3
Table S3. Structure and expression of miRNA
miRNA name	group	mature MiRNA id	mature length	mature sequence	precursor sequence	prcursor reads	mature reads	YF mature reads	GS mature reads	target
[truncated: 67 more rows]

## Sheet: S4
Table S4. Annotation of miRNA targets
[truncated: 58 more rows]
